# Supplementary material for: Organocatalytic atroposelective construction of axially chiral N, N- and N, S-1,2-azoles through novel ring formation approach
Source: PubMed Central journal article supplement (PMC9001698; doi:10.1038/s41467-022-29557-1), 2022-04-11
Supplement: 41467_2022_29557_MOESM1_ESM.pdf [file 41467_2022_29557_MOESM1_ESM.pdf]

*Supplementary Information for*

**Organocatalytic atroposelective construction of axially chiral N, N- and N, S-1,2-azoles through novel ring formation approach**

Yu Chang<sup>1,2</sup>, Chuandong Xie<sup>1,2</sup>, Hong Liu<sup>1</sup>, Shengli Huang<sup>1</sup>, Pengfei Wang<sup>1</sup>, Wenling Qin<sup>1\*</sup> and Hailong Yan<sup>1\*</sup>

<sup>1</sup>*Chongqing Key Laboratory of Natural Product Synthesis and Drug Research, School of Pharmaceutical Sciences, Chongqing University, Chongqing 401331, P. R. China.*

<sup>2</sup>These authors contributed equally: Yu Chang, Chuandong Xie.

Corresponding author e-mail: [wenling.qin@cqu.edu.cn](mailto:wenling.qin@cqu.edu.cn)

[yhl198151@cqu.edu.cn](mailto:yhl198151@cqu.edu.cn)

**Table of Contents**

|               |                                                                |            |
|---------------|----------------------------------------------------------------|------------|
| <b>I.</b>     | <b>General information</b> .....                               | <b>2</b>   |
| <b>II.</b>    | <b>General procedure for the synthesis of substrate</b> .....  | <b>3</b>   |
| <b>III.</b>   | <b>Optimization of the reaction conditions</b> .....           | <b>13</b>  |
| <b>IV.</b>    | <b>General procedure for the asymmetric reaction</b> .....     | <b>17</b>  |
| <b>V.</b>     | <b>Racemization studies</b> .....                              | <b>65</b>  |
| <b>VI.</b>    | <b>Control experiments and plausible catalytic cycle</b> ..... | <b>69</b>  |
| <b>VII.</b>   | <b><sup>1</sup>H and <sup>13</sup>C NMR spectra</b> .....      | <b>74</b>  |
| <b>VIII.</b>  | <b>X-ray crystallographic information</b> .....                | <b>187</b> |
| <b>IX.</b>    | <b>COX-2 inhibitory assay</b> .....                            | <b>191</b> |
| <b>X.</b>     | <b>Cell culture</b> .....                                      | <b>191</b> |
| <b>XI.</b>    | <b>Anti-proliferation assay</b> .....                          | <b>191</b> |
| <b>XII.</b>   | <b>Cell apoptosis analysis</b> .....                           | <b>192</b> |
| <b>XIII.</b>  | <b>Cell cycle analysis</b> .....                               | <b>192</b> |
| <b>XIV.</b>   | <b>ROS measurement</b> .....                                   | <b>193</b> |
| <b>XV.</b>    | <b>Mitochondrial membrane potential evaluation</b> .....       | <b>193</b> |
| <b>XVI.</b>   | <b>Western blot analysis</b> .....                             | <b>194</b> |
| <b>XVII.</b>  | <b>Druglikeness and activity cliff</b> .....                   | <b>194</b> |
| <b>XVIII.</b> | <b>Supplementary References</b> .....                          | <b>196</b> |

## I. General information

$^1\text{H}$  and  $^{13}\text{C}$  NMR spectra were recorded on Agilent 400MR DD2 (400 MHz) spectrometer. Chemical shifts were reported in parts per million (ppm), and tetramethylsilane or the residual solvent peak was used as an internal reference:  $^1\text{H}$  (tetramethylsilane  $\delta$  0.00 ppm, acetone  $\delta$  2.05 ppm, Dimethyl sulfoxide  $\delta$  2.50 ppm),  $^{13}\text{C}$  (chloroform  $\delta$  77.00 ppm, acetone  $\delta$  29.70 ppm, Dimethyl sulfoxide  $\delta$  39.52 ppm). All deuterated reagents were purchased from Adamas-beta<sup>®</sup>. Data are reported as follows: chemical shift, multiplicity (s = singlet, d = doublet, t = triplet, q = quartet, m = multiplet, br = broad), coupling constants (Hz) and integration. Enantiomeric excesses (ee) were determined by HPLC analysis on Hitachi Chromaster using DAICEL CHIRALCEL AD-H, 4.6 mm  $\Phi$   $\times$  250 mmL, DAICEL CHIRALCEL OD-H, 4.6 mm  $\Phi$   $\times$  250 mmL, DAICEL CHIRALCEL OJ-H, 4.6 mm  $\Phi$   $\times$  250 mmL, DAICEL CHIRALCEL IA-H, 4.6 mm  $\Phi$   $\times$  250 mmL, DAICEL CHIRALCEL IB-H, 4.6 mm  $\Phi$   $\times$  250 mmL and DAICEL CHIRALCEL IC-H, 4.6 mm  $\Phi$   $\times$  250 mmL. High resolution mass spectra (HRMS) were performed on Bruker Solarix 7.0 T. X-ray crystallography analysis of single crystal was performed on an Agilent SuperNova-CCD X-Ray diffractometer. Optical rotations were measured on a Rudolph Autopol I polarimeter and are reported as follows:  $[\alpha]_{\text{D}}^{20}$  ( $c$  in g per 100 mL solvent). Unless otherwise stated, all reagents were purchased from commercial suppliers and used without further purification. (PE: Petroleum ether; EA: Ethyl acetate). The instruments, reagents and materials used in the biological evaluation experiment can be found in **IX-XVII** of contents.

## II. General procedure for the synthesis of substrate

### General procedure for the synthesis of 1a-1u, 1x

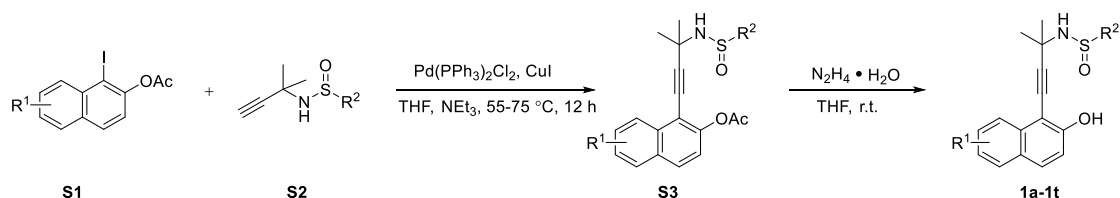

Starting materials **S1** and **S2** were prepared according to the known literatures.<sup>[1],[2],[3],[4]</sup>

**Step1:** **S2** (1.5 equiv) was dissolved in THF (3.0 mmol/mL) and dropwise added to a solution of the **S1** (1.0 equiv), Pd(PPh<sub>3</sub>)<sub>2</sub>Cl<sub>2</sub> (0.02 equiv), CuI (0.04 equiv), and NEt<sub>3</sub> (5.0 equiv) in THF (0.45 mmol/mL) at 55-75 °C under N<sub>2</sub> atmosphere. The mixture was stirred for 12 h. Then the mixture was filtered through a pad of celite. Removal of the solvent under reduced pressure. The crude product was purified by column chromatography on silica gel (PE: EA = 5:1) to afford **S3**.

**Step2:** **S3** (1.0 equiv) was dissolved in THF (0.02 mmol/mL) and hydrazinium hydroxide solution (3.0 equiv) was dropwise added in the mixture. The mixture stirred 15 min in room temperature. After the reaction was completed by TLC monitored. The reaction was quenched by pouring into cooled saturated NH<sub>4</sub>Cl aqueous and the mixture was extracted with EA. The organic phases were combined, washed with brine, dried over Na<sub>2</sub>SO<sub>4</sub>, and concentrated to afford the crude product. The purification of the crude mixture by flash column chromatography (PE/EA = 3:1-8:1) provided **1a-1u, 1x**.

(±)-**1v** was prepared according to the literature.<sup>[5]</sup> **1w** was prepared according to the literature.<sup>[2]</sup>

### General procedure for the synthesis of 3a-3p

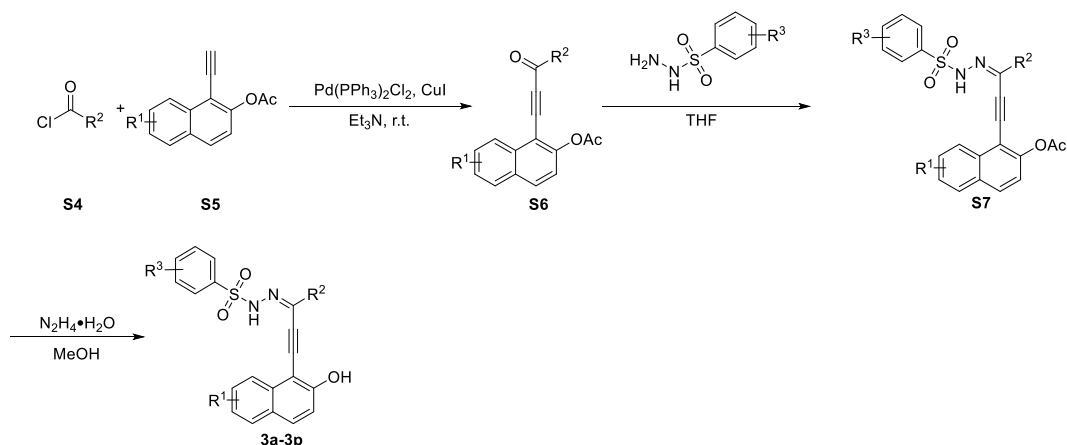

**Step1:** The preparation of **S3** was followed the literature procedure.<sup>[6]</sup> A mixture of the corresponding acyl chloride **S4** (1.2 equiv), Pd(PPh<sub>3</sub>)<sub>2</sub>Cl<sub>2</sub> (0.02 equiv) and NEt<sub>3</sub> (1.2 equiv) in anhydrous THF were stirred for 10 min at 25 °C under N<sub>2</sub> atmosphere. CuI (0.04 equiv) was then added and the reaction mixture was stirred for another 10 min. Terminal alkyne **S5** (1.0 equiv) was then added in one portion, the resulting mixture was stirred at 25 °C for 5 h. After the reaction was complete, EA was added, and the resulting solution was washed with 0.1N HCl in a separatory funnel. After the layers were separated, the organic phase was dried over Na<sub>2</sub>SO<sub>4</sub> and evaporated on a rotary evaporator to give the crude product, which was purified by flash chromatography on silica gel using PE/EA as the eluent to afford the corresponding  $\alpha$ ,  $\beta$ -alkynic ketones **S6**.

**Step2:** This step was carried out according to some literature methods<sup>[7],[8],[9]</sup> with some modification. To a solution of **S6** (1.0 equiv) and benzenesulfonyl hydrazide in a mixture of THF (1.0 mmol/mL) and stirred for 48 h. The reaction mixture was extracted with EA and the combined organic layer was washed with H<sub>2</sub>O and brine, dried over Na<sub>2</sub>SO<sub>4</sub>, filtered, and concentrated. The crude product was purified by flash chromatography (PE/EA = 20:1) to afford **S7**.

## Analytical dates of 3a-3p

### (Z)-N'-(1-(2-hydroxynaphthalen-1-yl)-4,4-dimethylpent-1-yn-3-ylidene)-4-methylbenzenesulfonohydrazide (3a)

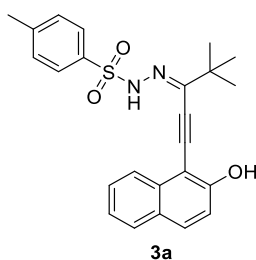

**Appearance:** white solid.

**<sup>1</sup>H NMR** (400 MHz, CDCl<sub>3</sub>) δ 7.98 (d, *J* = 8.3 Hz, 1H), 7.89 (d, *J* = 8.2 Hz, 2H), 7.76 (t, *J* = 9.2 Hz, 2H), 7.53 (t, *J* = 7.6 Hz, 1H), 7.36 (t, *J* = 7.5 Hz, 1H), 7.30 (d, *J* = 8.9 Hz, 1H), 7.26 (d, *J* = 7.1 Hz, 2H), 2.37 (s, 3H), 1.26 (s, 9H).

**<sup>13</sup>C NMR** (100 MHz, CDCl<sub>3</sub>) δ 157.96, 148.21, 143.93, 135.49, 129.51, 128.40, 128.20, 127.88, 127.74, 124.37, 124.27, 116.86, 101.55, 100.75, 100.69, 89.56, 88.88, 37.12, 28.21, 21.54.

**HRMS (ESI)** *m/z* Calcd for [C<sub>24</sub>H<sub>24</sub>N<sub>2</sub>NaO<sub>3</sub>S, M + Na]<sup>+</sup>: 443.1400, Found: 443.1407.

### (Z)-N'-(4-(2-hydroxynaphthalen-1-yl)but-3-yn-2-ylidene)-4-methylbenzenesulfonohydrazide (3b)

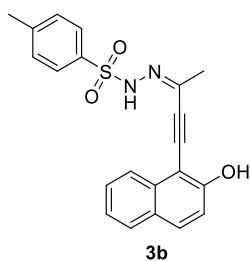

**Appearance:** white solid.

**<sup>1</sup>H NMR** (400 MHz, acetone-*d*<sub>6</sub>) δ 10.17 (s, 1H), 9.71 (s, 1H), 8.07 (d, *J* = 8.4 Hz, 1H), 7.98 (d, *J* = 9.0 Hz, 1H), 7.90 (d, *J* = 8.1 Hz, 1H), 7.82 (d, *J* = 8.2 Hz, 2H), 7.60 (t, *J* = 7.5 Hz, 1H), 7.42 (dd, *J* = 14.7, 8.0 Hz, 4H), 2.41 (s, 3H), 2.19 (s, 3H).

**<sup>13</sup>C NMR** (100 MHz, acetone-*d*<sub>6</sub>) δ 206.19, 159.79, 144.74, 137.60, 135.46, 134.24, 133.53, 130.46, 129.39, 129.03, 128.89, 128.48, 125.13, 125.06, 118.03, 101.79, 98.42, 90.78, 29.85, 22.21, 21.44.

**HRMS (ESI)** *m/z* Calcd for [C<sub>21</sub>H<sub>18</sub>N<sub>2</sub>NaO<sub>3</sub>S, M + Na]<sup>+</sup>: 401.0930, Found: 401.0935.

### (Z)-N'-(1-(2-hydroxynaphthalen-1-yl)pent-1-yn-3-ylidene)-4-methylbenzenesulfonohydrazide (3c)

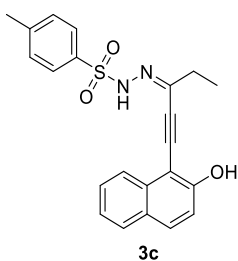

**Appearance:** white solid.

**<sup>1</sup>H NMR** (400 MHz, CDCl<sub>3</sub>) δ 7.98 (d, *J* = 8.1 Hz, 1H), 7.90 (d, *J* = 7.0 Hz, 2H), 7.74 (t, *J* = 9.0 Hz, 2H), 7.52 (t, *J* = 7.0 Hz, 1H), 7.33 (dd, *J* = 19.0, 8.2 Hz, 2H), 7.24 (d, *J* = 7.3 Hz, 2H), 2.52 (q, *J* = 7.2, 6.6 Hz, 2H), 2.35 (s, 3H), 1.24 (t, *J* = 7.5 Hz, 3H).

**<sup>13</sup>C NMR** (100 MHz, CDCl<sub>3</sub>) δ 158.27, 144.01, 141.68, 135.45, 132.87, 132.55, 129.66, 128.33, 128.05, 127.63, 124.33, 124.22, 116.84, 101.23, 99.84, 89.83, 28.71, 21.52, 11.53.

**HRMS (ESI)** *m/z* Calcd for [C<sub>22</sub>H<sub>20</sub>N<sub>2</sub>NaO<sub>3</sub>S, M + Na]<sup>+</sup>: 415.1087, Found: 415.1080.

### (Z)-N'-(1-(2-hydroxynaphthalen-1-yl)-4-methylpent-1-yn-3-ylidene)-4-methylbenzenesulfonohydrazide (3d)

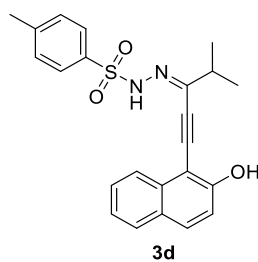

**Appearance:** white solid.

**<sup>1</sup>H NMR** (400 MHz, CDCl<sub>3</sub>) δ 7.98 (d, *J* = 8.2 Hz, 1H), 7.91 (d, *J* = 8.1 Hz, 2H), 7.75 (t, *J* = 9.0 Hz, 2H), 7.53 (d, *J* = 7.2 Hz, 1H), 7.34 (dd, *J* = 10.9, 7.2 Hz, 2H), 7.24 (d, *J* = 6.1 Hz, 2H), 2.79 (dt, *J* = 13.4, 6.7 Hz, 1H), 2.35 (s, 3H), 1.23 (d, *J* = 6.7 Hz, 6H).

**<sup>13</sup>C NMR** (100 MHz, CDCl<sub>3</sub>) δ 158.25, 146.14, 144.01, 135.38, 132.84, 132.54, 129.62, 128.36, 128.09, 127.82, 127.64, 124.31, 124.23, 116.86, 101.32, 100.75, 88.86, 34.07, 21.53, 20.55.

**HRMS (ESI)** *m/z* Calcd for [C<sub>23</sub>H<sub>22</sub>N<sub>2</sub>NaO<sub>3</sub>S, M + Na]<sup>+</sup>: 429.1243, Found: 429.1240.

**(Z)-N'-(4-ethyl-1-(2-hydroxynaphthalen-1-yl)hex-1-yn-3-ylidene)-4-methylbenzenesulfonohydrazide (3e)**

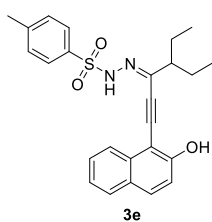

**Appearance:** white solid.

**<sup>1</sup>H NMR** (400 MHz, CDCl<sub>3</sub>) δ 9.91 (s, 1H), 8.62 (s, 1H), 7.96 (d, *J* = 8.3 Hz, 1H), 7.90 (d, *J* = 8.2 Hz, 2H), 7.77 (dd, *J* = 14.8, 8.6 Hz, 2H), 7.53 (t, *J* = 7.6 Hz, 1H), 7.36 (dd, *J* = 8.0, 4.9 Hz, 2H), 7.23 (d, *J* = 8.1 Hz, 2H), 2.34 (m, 4H), 1.61 (dq, *J* = 13.8, 6.8 Hz, 4H), 0.71 (t, *J* = 7.4 Hz, 6H).

**<sup>13</sup>C NMR** (100 MHz, CDCl<sub>3</sub>) δ 158.45, 145.48, 144.01, 135.24, 132.86, 132.63, 129.98, 129.65, 128.39, 128.31, 128.10, 127.86, 127.68, 124.31, 124.25, 116.90, 101.34, 100.64, 88.60, 48.51, 26.35, 21.49, 11.51.

**HRMS (ESI)** *m/z* Calcd for [C<sub>25</sub>H<sub>26</sub>N<sub>2</sub>NaO<sub>3</sub>S, M + Na]<sup>+</sup>: 457.1556, Found: 457.1558.

**(Z)-N'-(1-cyclopentyl-3-(2-hydroxynaphthalen-1-yl)prop-2-yn-1-ylidene)-4-methylbenzenesulfonohydrazide (3f)**

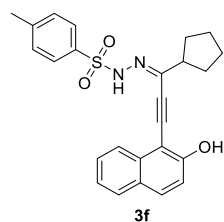

**Appearance:** white solid.

**<sup>1</sup>H NMR** (600 MHz, CDCl<sub>3</sub>) δ 9.71 (s, 1H), 8.09 (s, 1H), 7.96 (d, *J* = 8.2 Hz, 1H), 7.90 (d, *J* = 7.9 Hz, 2H), 7.78 (d, *J* = 9.5 Hz, 1H), 7.76 (d, *J* = 8.3 Hz, 1H), 7.53 (t, *J* = 7.8 Hz, 1H), 7.37 (t, *J* = 7.7 Hz, 1H), 7.31 (d, *J* = 8.8 Hz, 1H), 7.28 – 7.24 (m, 2H), 2.95 (p, *J* = 8.0 Hz, 1H), 2.37 (s, 3H), 1.96 – 1.88 (m, 2H), 1.84 – 1.73 (m, 4H), 1.68 – 1.59 (m, 2H).

**<sup>13</sup>C NMR** (150 MHz, CDCl<sub>3</sub>) δ 158.05, 144.61, 144.00, 135.57, 132.93, 132.57, 129.65, 128.42, 128.21, 127.92, 127.72, 124.34, 116.84, 101.37, 99.87, 89.25, 44.90, 31.16, 25.55, 21.56.

**HRMS (ESI)** *m/z* Calcd for [C<sub>25</sub>H<sub>24</sub>N<sub>2</sub>NaO<sub>3</sub>S, M + Na]<sup>+</sup>: 455.1400, Found: 455.1405.

**(Z)-N'-(1-cyclohexyl-3-(2-hydroxynaphthalen-1-yl)prop-2-yn-1-ylidene)-4-methylbenzenesulfonohydrazide (3g)**

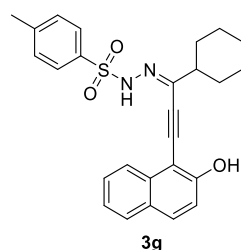

**Appearance:** yellow solid.

**<sup>1</sup>H NMR** (400 MHz, CDCl<sub>3</sub>) δ 9.83 (s, 1H), 8.37 (s, 1H), 7.98 (d, *J* = 8.3 Hz, 1H), 7.90 (d, *J* = 8.2 Hz, 2H), 7.76 (t, *J* = 9.1 Hz, 2H), 7.54 (t, *J* = 7.5 Hz, 1H), 7.41 – 7.30 (m, 2H), 7.28 – 7.21 (m, 2H), 2.48 (t, *J* = 11.5, 3.3 Hz, 1H), 2.36 (s, 3H), 1.89 (dd, *J* = 12.3 Hz, 2H), 1.79 (dd, *J* = 12.5 Hz, 2H), 1.70 (dd, *J* = 10.9 Hz, 1H), 1.56 – 1.43 (m, 2H), 1.30 (td, *J* = 23.2, 21.8, 13.2 Hz, 3H).

**<sup>13</sup>C NMR** (100 MHz, CDCl<sub>3</sub>) δ 158.16, 145.23, 143.99, 135.46, 132.86, 132.53, 129.65, 128.38, 128.13, 127.84, 127.65, 124.38, 124.26, 116.85, 101.40, 100.51, 89.35, 43.29, 30.72, 25.78, 25.63, 21.56.

**HRMS (ESI)** *m/z* Calcd for [C<sub>26</sub>H<sub>26</sub>N<sub>2</sub>NaO<sub>3</sub>S, M + Na]<sup>+</sup>: 469.1556, Found: 469.1561.

**N'-(Z)-1-((3*r*,5*r*,7*r*)-adamantan-1-yl)-3-(2-hydroxynaphthalen-1-yl) prop-2-yn-1-ylidene)-4 methylbenzenesulfonohydrazide (3h)**

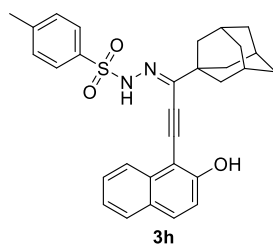

**Appearance:** white solid.

**<sup>1</sup>H NMR** (400 MHz, CDCl<sub>3</sub>) δ 9.79 (s, 1H), 8.35 (s, 1H), 7.99 (d, *J* = 8.3 Hz, 1H), 7.91 (d, *J* = 8.0 Hz, 2H), 7.75 (t, *J* = 8.1 Hz, 2H), 7.54 (t, *J* = 7.5 Hz, 1H), 7.35 (t, *J* = 7.8 Hz, 2H), 7.26 (d, *J* = 8.4 Hz, 2H), 2.37 (s, 3H), 2.07 (m, 3H), 1.89 (m, 6H), 1.75 (m, *J* = 12.4 Hz, 6H).

**<sup>13</sup>C NMR** (100 MHz, CDCl<sub>3</sub>) δ 158.05, 148.60, 143.92, 135.41, 132.88, 132.38, 129.54, 128.37, 128.14, 127.81, 127.68, 124.38, 124.20, 116.88, 101.56, 100.94, 88.74, 40.36,

38.75, 36.61, 28.20, 21.56.

**HRMS (ESI)** *m/z* Calcd for [C<sub>30</sub>H<sub>30</sub>N<sub>2</sub>NaO<sub>3</sub>S, M + Na]<sup>+</sup>: 521.1869, Found: 521.1863.

**(Z)-N'-(3-(2-hydroxynaphthalen-1-yl)-1-phenylprop-2-yn-1-ylidene)-4-methylbenzenesulfonohydrazide (3i)**

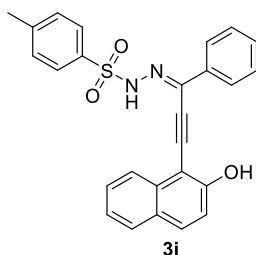

**Appearance:** white solid.

**<sup>1</sup>H NMR** (400 MHz, CDCl<sub>3</sub>) δ 10.27 (s, 1H), 8.61 (s, 1H), 8.09 (d, *J* = 8.1 Hz, 1H), 7.99 (dd, *J* = 13.7, 7.3 Hz, 4H), 7.77 (dd, *J* = 15.7, 8.5 Hz, 2H), 7.57 (t, *J* = 7.2 Hz, 1H), 7.50 – 7.30 (m, 5H), 7.26 (d, *J* = 8.2 Hz, 3H), 2.34 (s, 3H).

**<sup>13</sup>C NMR** (100 MHz, CDCl<sub>3</sub>) δ 158.12, 144.27, 136.92, 135.55, 133.63, 132.86, 132.74, 130.07, 129.82, 128.46, 128.20, 127.98, 127.71, 126.70, 124.50, 124.39, 116.78, 101.74, 101.51, 88.86, 21.56.

**HRMS (ESI)** *m/z* Calcd for [C<sub>26</sub>H<sub>20</sub>N<sub>2</sub>NaO<sub>3</sub>S, M + Na]<sup>+</sup>: 463.1087, Found: 463.1080.

**(Z)-N'-(1-(2-hydroxynaphthalen-1-yl)-4,4-dimethylpent-1-yn-3-ylidene) benzenesulfonohydrazide (3j)**

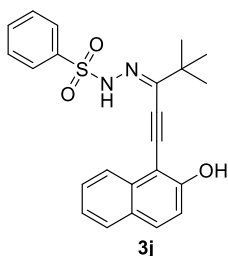

**Appearance:** white solid.

**<sup>1</sup>H NMR** (400 MHz, CDCl<sub>3</sub>) δ 9.73 (s, 1H), 8.25 (s, 1H), 8.00 (dd, *J* = 15.7, 8.2 Hz, 3H), 7.77 (dd, *J* = 12.4, 8.7 Hz, 2H), 7.52 (dq, *J* = 21.6, 6.9 Hz, 4H), 7.37 (t, *J* = 7.5 Hz, 1H), 7.31 (d, *J* = 8.9 Hz, 1H), 1.25 (s, 9H).

**<sup>13</sup>C NMR** (100 MHz, CDCl<sub>3</sub>) δ 157.93, 148.54, 138.37, 133.10, 132.95, 132.51, 128.91, 128.41, 128.20, 127.93, 127.71, 124.38, 124.32, 116.78, 101.53, 100.87, 88.88, 37.13, 28.18.

**HRMS (ESI)** *m/z* Calcd for [C<sub>23</sub>H<sub>22</sub>N<sub>2</sub>NaO<sub>3</sub>S, M + Na]<sup>+</sup>: 429.1243, Found: 429.1248.

**(Z)-N'-(3-(2-hydroxynaphthalen-1-yl)-1-(p-tolyl)prop-2-yn-1-ylidene) benzenesulfonohydrazide (3k)**

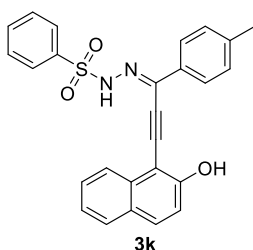

**Appearance:** white solid.

**<sup>1</sup>H NMR** (400 MHz, acetone-*d*<sub>6</sub>) δ 8.20 (d, *J* = 8.3 Hz, 1H), 8.03 (dd, *J* = 12.2, 8.3 Hz, 3H), 7.93 (t, *J* = 9.1 Hz, 3H), 7.63 (p, *J* = 7.0 Hz, 4H), 7.50 – 7.41 (m, 2H), 7.30 (d, *J* = 7.9 Hz, 2H), 2.37 (s, 3H).

**<sup>13</sup>C NMR** (100 MHz, acetone-*d*<sub>6</sub>) δ 206.24, 160.12, 141.17, 140.40, 136.83, 134.14, 134.01, 133.69, 132.25, 130.18, 130.03, 129.43, 129.04, 129.01, 128.45, 127.21, 125.15, 118.00, 101.87, 101.69, 88.99, 30.42, 30.22, 30.03, 29.84, 29.65, 29.45, 29.26, 21.35.

**HRMS (ESI)** *m/z* Calcd for [C<sub>26</sub>H<sub>20</sub>N<sub>2</sub>NaO<sub>3</sub>S, M + Na]<sup>+</sup>: 463.1087, Found: 463.1082.

**(Z)-N'-(1-(2-hydroxynaphthalen-1-yl)-4,4-dimethylpent-1-yn-3-ylidene)-2,4,6-trimethylbenzenesulfonohydrazide (3l)**

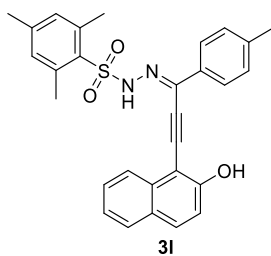

**Appearance:** white solid.

**<sup>1</sup>H NMR** (400 MHz, acetone-*d*<sub>6</sub>) δ 8.23 (d, *J* = 8.3 Hz, 1H), 8.01 (d, *J* = 9.0 Hz, 1H), 7.90 (dd, *J* = 14.2, 8.2 Hz, 3H), 7.66 (t, *J* = 7.6 Hz, 1H), 7.52 – 7.41 (m, 2H), 7.28 (d, *J* = 7.9 Hz, 2H), 7.02 (s, 2H), 2.77 (s, 6H), 2.35 (s, 3H), 2.23 (s, 3H).

**<sup>13</sup>C NMR** (100 MHz, acetone-*d*<sub>6</sub>) δ 206.36, 160.19, 143.83, 141.01, 140.58, 135.41, 134.42, 134.11, 133.71, 132.65, 132.19, 130.21, 129.47, 129.08, 129.02, 126.98, 125.17, 125.08, 117.87, 101.95, 101.83, 88.67, 29.85, 23.36, 21.34, 20.87.

**HRMS (ESI)** *m/z* Calcd for [C<sub>29</sub>H<sub>26</sub>N<sub>2</sub>NaO<sub>3</sub>S, M + Na]<sup>+</sup>: 505.1556, Found: 505.1550.

**(Z)-N'-(1-(2-hydroxynaphthalen-1-yl)-4,4-dimethylpent-1-yn-3-ylidene)-4-(trifluoromethyl)benzenesulfonohydra-zide (3m)**

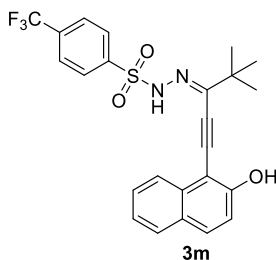

**Appearance:** white solid.

**<sup>1</sup>H NMR** (400 MHz, CDCl<sub>3</sub>) δ 9.86 (s, 1H), 8.14 (d, *J* = 7.9 Hz, 2H), 8.09 (d, *J* = 9.1 Hz, 1H), 7.98 (d, *J* = 8.1 Hz, 1H), 7.83 – 7.68 (m, 4H), 7.54 (t, *J* = 7.3 Hz, 1H), 7.39 (q, *J* = 7.7, 7.2 Hz, 1H), 7.31 (d, *J* = 8.9 Hz, 1H), 1.27 (s, 9H).

**<sup>13</sup>C NMR** (100 MHz, CDCl<sub>3</sub>) δ 157.97, 149.34, 141.88, 134.80, 134.47, 132.94, 132.61, 128.29 (q, *J* = 22.4 Hz), 128.25, 127.99, 126.00 (q, *J* = 3.5 Hz), 124.47, 124.35 (q, *J* = 8.3 Hz), 121.83 (q, *J* = 240.1 Hz), 116.74, 101.47, 88.74, 77.00, 37.17, 29.85, 28.14.

**HRMS (ESI)** *m/z* Calcd for [C<sub>24</sub>H<sub>21</sub>F<sub>3</sub>N<sub>2</sub>NaO<sub>3</sub>S, M + Na]<sup>+</sup>: 497.1117, Found: 497.1113.

**(Z)-4-chloro-N'-(1-(2-hydroxynaphthalen-1-yl)-4,4-dimethylpent-1-yn-3-ylidene)benzenesulfonohydra-zide (3n)**

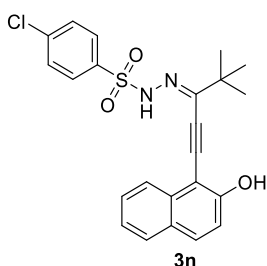

**Appearance:** white solid.

**<sup>1</sup>H NMR** (400 MHz, CDCl<sub>3</sub>) δ 9.83 (s, 1H), 8.20 (s, 1H), 7.96 (t, *J* = 8.5 Hz, 3H), 7.76 (dd, *J* = 12.3, 8.8 Hz, 2H), 7.53 (t, *J* = 7.5 Hz, 1H), 7.43 (d, *J* = 8.4 Hz, 2H), 7.39 – 7.28 (m, 2H), 1.27 (s, 9H).

**<sup>13</sup>C NMR** (100 MHz, CDCl<sub>3</sub>) δ 157.88, 149.14, 139.73, 136.68, 132.88, 132.61, 129.24, 129.12, 128.40, 128.17, 127.96, 124.37, 116.70, 101.47, 101.27, 88.81, 37.15, 28.18.

**HRMS (ESI)** *m/z* Calcd for [C<sub>23</sub>H<sub>21</sub>ClN<sub>2</sub>NaO<sub>3</sub>S, M + Na]<sup>+</sup>: 463.0854, Found: 463.0850.

**(Z)-N'-(1-(7-bromo-2-hydroxynaphthalen-1-yl)-4,4-dimethylpent-1-yn-3-ylidene)-4-chlorobenzenesulfono-hydra-zide (3o)**

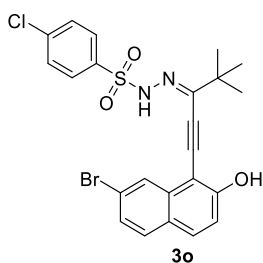

**Appearance:** white solid.

**<sup>1</sup>H NMR** (400 MHz, acetone-*d*<sub>6</sub>) δ 10.47 (s, 1H), 9.66 (s, 1H), 8.19 (s, 1H), 8.00 (d, *J* = 9.1 Hz, 1H), 7.97 – 7.91 (m, 2H), 7.86 (d, *J* = 8.6 Hz, 1H), 7.67 (d, *J* = 8.6 Hz, 2H), 7.53 (dd, *J* = 8.7, 2.0 Hz, 1H), 7.44 (d, *J* = 9.0 Hz, 1H), 1.28 (s, 9H).

**<sup>13</sup>C NMR** (100 MHz, acetone-*d*<sub>6</sub>) δ 206.20, 160.56, 148.30, 139.65, 138.82, 135.45, 133.46, 131.46, 130.30, 130.06, 128.24, 127.45, 127.11, 123.05, 118.61, 101.30, 100.24, 89.08, 37.97, 29.85, 28.47.

**HRMS (ESI)** *m/z* Calcd for [C<sub>23</sub>H<sub>20</sub>BrClN<sub>2</sub>NaO<sub>3</sub>S, M + Na]<sup>+</sup>: 540.9959, Found: 540.9952.

**(Z)-N'-(1-(7-bromo-2-hydroxynaphthalen-1-yl)-4,4-dimethylpent-1-yn-3-ylidene)-4-methylbenzenesulfono-hydra-zide (3p)**

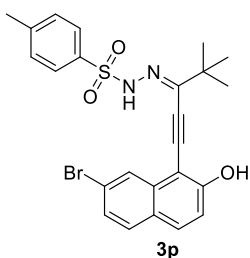

**Appearance:** yellow solid.

**<sup>1</sup>H NMR** (400 MHz, CDCl<sub>3</sub>) δ 9.76 (s, 1H), 8.62 (s, 1H), 8.06 (s, 1H), 7.91 (d, *J* = 7.9 Hz, 2H), 7.71 (d, *J* = 8.9 Hz, 1H), 7.58 (d, *J* = 8.6 Hz, 1H), 7.39 (dd, *J* = 19.1, 8.7 Hz, 2H), 7.27 (d, *J* = 8.4 Hz, 2H), 2.38 (s, 3H), 1.27 (s, 9H).

**<sup>13</sup>C NMR** (100 MHz, CDCl<sub>3</sub>) δ 158.66, 148.41, 144.13, 135.20, 134.08, 132.26, 129.91, 129.60, 127.68, 126.71, 126.51, 122.46, 117.29, 100.85, 100.23, 89.10, 37.08, 28.19, 21.58.

**HRMS (ESI)** *m/z* Calcd for [C<sub>24</sub>H<sub>23</sub>BrN<sub>2</sub>NaO<sub>3</sub>S, M + Na]<sup>+</sup>: 521.0505, Found: 521.0509.



## General procedure for the synthesis of 3q-3aa

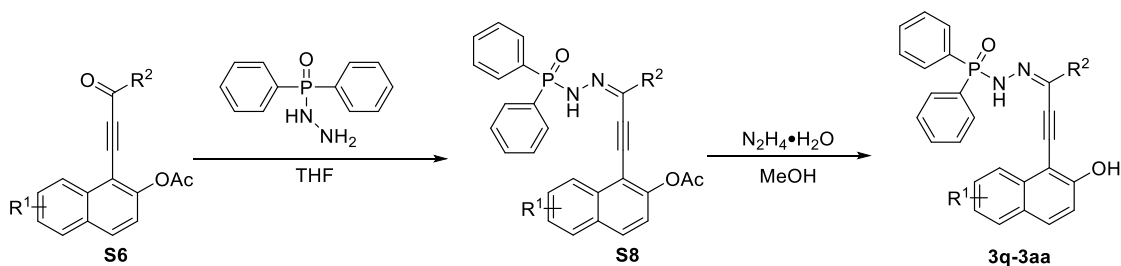

### Starting materials S6 from General procedure for the synthesis of 3a-3p

**Step1:** This step was carried out according to reported literature methods<sup>[7],[8]</sup> with some modification. Dissolve crude S6 (1.0 equiv) and *P, P*-Diphenylphosphinic hydrazide in THF (1.0 mmol/mL). The mixture stirred 48 hours in room temperature. The reaction was quenched by pouring into cooled saturated NH<sub>4</sub>Cl aqueous and the mixture was extracted with EA. The organic phases were combined, washed with brine, dried over Na<sub>2</sub>SO<sub>4</sub>, and concentrated to afford the crude product. The crude product was purified by flash chromatography (PE/EA = 20:1) to afford S8.

**Step2:** This step was carried out according to a literature method<sup>[9]</sup> with some modification. Dissolve crude S8 (1.0 equiv) in MeOH and hydrazinium hydroxide solution (3.0 equiv) was dropwise added in the mixture. The mixture stirred 15 min in room temperature. After the reaction was completed by TLC monitored. The reaction was quenched by pouring into cooled saturated NH<sub>4</sub>Cl aqueous and the mixture was extracted with EA. The organic phases were combined, washed with brine, dried over Na<sub>2</sub>SO<sub>4</sub>, and concentrated to afford the crude product. The purification of the crude mixture by flash column chromatography (PE/EA = 10:1) provided 3q-3aa.

### Analytical dates of 3a-3p

#### (*Z*)-*N'*-(1-(2-hydroxynaphthalen-1-yl)-4,4-dimethylpent-1-yn-3-ylidene)-*P, P*-diphenylphosphinic hydrazide (3q)

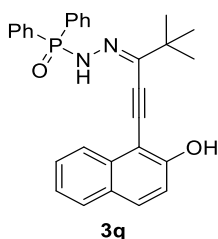

**Appearance:** white solid.

**<sup>1</sup>H NMR** (400 MHz, DMSO-*d*<sub>6</sub>) δ 11.06 (s, 1H), 8.48 (d, *J* = 20.7 Hz, 1H), 7.97 (d, *J* = 8.3 Hz, 1H), 7.94 – 7.75 (m, 6H), 7.64 – 7.58 (m, 2H), 7.54 (t, *J* = 7.7 Hz, 5H), 7.38 (t, *J* = 7.4 Hz, 1H), 7.28 (d, *J* = 9.0 Hz, 1H), 1.20 (s, 9H).

**<sup>13</sup>C NMR** (100 MHz, DMSO-*d*<sub>6</sub>) δ 159.24, 144.10, 143.95, 133.12, 132.67, 132.07, 131.73, 131.64, 131.40, 128.60, 128.48, 127.96, 127.33, 123.81, 123.48, 117.71, 100.48, 99.37, 87.62, 39.50, 36.87, 28.24.

**HRMS** (ESI) *m/z* Calcd for [C<sub>29</sub>H<sub>27</sub>N<sub>2</sub>NaO<sub>2</sub>P, M + Na]<sup>+</sup>: 489.1702, Found: 489.1707.

**(Z)-N'-(4-ethyl-1-(2-hydroxynaphthalen-1-yl)hex-1-yn-3-ylidene)-P,Pdiphenylphosphinic hydrazide (3r)**

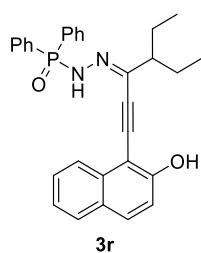

**Appearance:** white solid.

**<sup>1</sup>H NMR** (400 MHz, DMSO-*d*<sub>6</sub>) δ 10.91 (s, 1H), 8.60 (d, *J* = 21.1 Hz, 1H), 8.02 – 7.77 (m, 7H), 7.67 – 7.50 (m, 7H), 7.40 (t, *J* = 7.4 Hz, 1H), 7.28 (d, *J* = 9.0 Hz, 1H), 2.27 – 2.16 (t, 1H), 1.63 (dtq, *J* = 20.4, 13.2, 7.2 Hz, 4H), 0.83 (t, *J* = 7.3 Hz, 6H).

**<sup>13</sup>C NMR** (100 MHz, DMSO-*d*<sub>6</sub>) δ 159.22, 140.64, 140.49, 133.15, 132.60, 132.16, 132.13, 132.11, 131.81, 131.71, 131.33, 128.68, 128.60, 128.55, 127.99, 127.35, 123.85, 123.42, 117.77, 100.39, 98.12, 87.49, 48.53, 39.50, 25.94, 11.73.

**HRMS (ESI)** *m/z* Calcd for [C<sub>30</sub>H<sub>29</sub>N<sub>2</sub>NaO<sub>2</sub>P, M + Na]<sup>+</sup>: 503.1859, Found: 503.1854.

**(Z)-N'-(1-cyclopropyl-3-(2-hydroxynaphthalen-1-yl)prop-2-yn-1-ylidene)-P,P-diphenylphosphinic hydrazide (3s)**

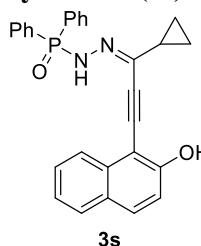

**Appearance:** white solid.

**<sup>1</sup>H NMR** (400 MHz, DMSO-*d*<sub>6</sub>) δ 11.02 (s, 1H), 8.48 (d, *J* = 19.7 Hz, 1H), 8.00 – 7.70 (m, 7H), 7.54 (dd, *J* = 41.2, 6.8 Hz, 7H), 7.41 – 7.33 (m, 1H), 7.28 (d, *J* = 8.7 Hz, 1H), 1.86 (s, 1H), 0.89 (d, *J* = 9.6 Hz, 4H).

**<sup>13</sup>C NMR** (100 MHz, DMSO-*d*<sub>6</sub>) δ 159.46, 140.10, 139.94, 133.12, 132.54, 132.25, 132.12, 131.87, 131.78, 131.26, 128.77, 128.58, 127.94, 127.29, 123.83, 123.45, 117.78, 100.06, 97.85, 85.94, 39.50, 15.68, 6.03.

**HRMS (ESI)** *m/z* Calcd for [C<sub>28</sub>H<sub>23</sub>N<sub>2</sub>NaO<sub>2</sub>P, M + Na]<sup>+</sup>: 473.1389, Found: 473.1382.

**(Z)-N'-(1-cyclobutyl-3-(2-hydroxynaphthalen-1-yl)prop-2-yn-1-ylidene)-P,P-diphenylphosphinic hydrazide (3t)**

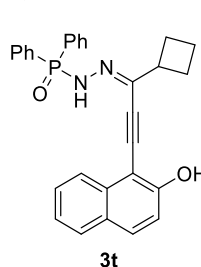

**Appearance:** white solid.

**<sup>1</sup>H NMR** (400 MHz, DMSO-*d*<sub>6</sub>) δ 10.88 (s, 1H), 8.53 (d, *J* = 20.3 Hz, 1H), 7.99 (d, *J* = 8.3 Hz, 1H), 7.94 – 7.75 (m, 6H), 7.61 – 7.48 (m, 6H), 7.36 (t, *J* = 7.4 Hz, 1H), 7.26 (d, *J* = 9.0 Hz, 1H), 3.29 (m, *J* = 8.4 Hz, 1H), 2.32 – 2.20 (m, 2H), 2.19 – 2.09 (m, 2H), 1.99 – 1.87 (m, 1H), 1.86 – 1.76 (m, 1H).

**<sup>13</sup>C NMR** (100 MHz, DMSO-*d*<sub>6</sub>): δ 159.18, 140.44, 140.29, 133.21, 132.50, 132.22, 132.17, 132.14, 131.86, 131.77, 131.22, 128.76, 128.63, 128.61, 127.97, 127.39, 123.88, 123.55, 100.37, 98.44, 87.91, 39.50, 26.31, 17.91.

**HRMS (ESI)** *m/z* Calcd for [C<sub>29</sub>H<sub>25</sub>N<sub>2</sub>NaO<sub>2</sub>P, M + Na]<sup>+</sup>: 487.1546, Found: 487.1541.

**(Z)-N'-(1-cyclohexyl-3-(2-hydroxynaphthalen-1-yl)prop-2-yn-1-ylidene)-P,P-diphenylphosphinic hydrazide (3u)**

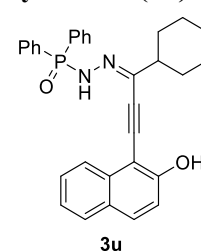

**Appearance:** white solid.

**<sup>1</sup>H NMR** (400 MHz, DMSO-*d*<sub>6</sub>) δ 11.00 (s, 1H), 8.51 (d, *J* = 20.4 Hz, 1H), 7.97 (d, *J* = 8.3 Hz, 1H), 7.93 – 7.65 (m, 6H), 7.64 – 7.48 (m, 6H), 7.38 (t, *J* = 7.3 Hz, 1H), 7.27 (d, *J* = 8.9 Hz, 1H), 2.40 (m, 1H), 1.89 – 1.78 (m, 2H), 1.77 – 1.68 (m, 2H), 1.67 – 1.58 (m, 1H), 1.48 (m, *J* = 12.2, 3.2 Hz, 2H), 1.37 – 1.11 (m, 3H).

**<sup>13</sup>C NMR** (100 MHz, DMSO-*d*<sub>6</sub>) δ 159.20, 141.38, 141.23, 133.15, 132.58, 132.11, 131.80, 131.71, 131.31, 128.71, 128.58, 127.95, 127.34, 123.83, 123.52, 117.77, 100.40, 98.53,

88.09, 43.16, 39.50, 30.59, 25.54, 25.15.

**HRMS (ESI)** *m/z* Calcd for [C<sub>31</sub>H<sub>29</sub>N<sub>2</sub>NaO<sub>2</sub>P, M + Na]<sup>+</sup>: 515.1859, Found: 515.1853.

***N'*-((*Z*)-1-((3*r*,5*r*,7*r*)-adamantan-1-yl)-3-(2-hydroxynaphthalen-1-yl)prop-2-yn-1-ylidene)-*P*, *P*-diphenylphosphinic hydrazide (**3v**)**

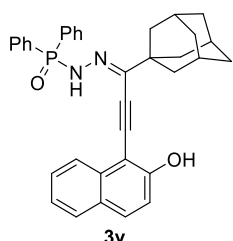

**Appearance:** white solid.

**<sup>1</sup>H NMR** (400 MHz, DMSO-*d*<sub>6</sub>) δ 10.97 (s, 1H), 8.49 (d, *J* = 20.7 Hz, 1H), 8.00 (d, *J* = 8.3 Hz, 1H), 7.90 (dd, *J* = 13.8, 8.6 Hz, 2H), 7.82 (dd, *J* = 11.7, 7.5 Hz, 4H), 7.66 – 7.50 (m, 7H), 7.39 (t, *J* = 7.4 Hz, 1H), 7.27 (d, *J* = 9.0 Hz, 1H), 2.02 (m, 3H), 1.84 (m, 6H), 1.69 (m, *J* = 12.0 Hz, 6H).

**<sup>13</sup>C NMR** (100 MHz, DMSO-*d*<sub>6</sub>) δ 159.14, 144.55, 144.40, 133.09, 132.69, 132.07, 132.03, 131.73, 131.64, 131.42, 128.63, 128.50, 127.97, 127.36, 123.84, 123.51, 117.69, 100.54, 99.24, 87.46, 40.32, 39.50, 38.47, 36.21, 27.70.

**HRMS (ESI)** *m/z* Calcd for [C<sub>35</sub>H<sub>33</sub>N<sub>2</sub>NaO<sub>2</sub>P, M + Na]<sup>+</sup>: 567.2172, Found: 567.2168.

***Z*-*N'*-(3-(2-hydroxynaphthalen-1-yl)-1-(*p*-tolyl)prop-2-yn-1-ylidene)-*P*,*P*-diphenylphosphinic hydrazide (**3w**)**

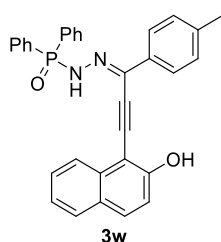

**Appearance:** white solid.

**<sup>1</sup>H NMR** (400 MHz, DMSO-*d*<sub>6</sub>) δ 11.16 (s, 1H), 8.99 (d, *J* = 21.0 Hz, 1H), 8.10 (d, *J* = 8.3 Hz, 1H), 8.02 – 7.82 (m, 6H), 7.74 (d, *J* = 7.9 Hz, 2H), 7.69 – 7.49 (m, 7H), 7.40 (t, *J* = 7.4 Hz, 1H), 7.33 (d, *J* = 9.0 Hz, 1H), 7.26 (d, *J* = 7.8 Hz, 2H), 2.31 (s, 3H).

**<sup>13</sup>C NMR** (100 MHz, DMSO-*d*<sub>6</sub>) δ 159.48, 139.11, 134.19, 134.03, 133.12, 132.39, 132.28, 131.88, 131.79, 131.14, 129.37, 128.78, 128.65, 128.06, 127.39, 125.61, 123.92, 123.78, 117.71, 100.38, 99.95, 87.57, 39.50, 20.92.

**HRMS (ESI)** *m/z* Calcd for [C<sub>32</sub>H<sub>25</sub>N<sub>2</sub>NaO<sub>2</sub>P, M + Na]<sup>+</sup>: 523.1546, Found: 523.1540.

***Z*-*N'*-(1-cyclopropyl-3-(2-hydroxy-7-methoxynaphthalen-1-yl) prop-2-yn-1-ylidene)-*P*, *P*-diphenylphosphinic hydrazide (**3x**)**

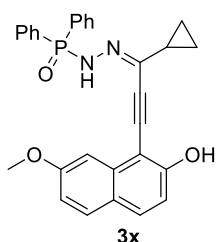

**Appearance:** white solid.

**<sup>1</sup>H NMR** (400 MHz, DMSO-*d*<sub>6</sub>) δ 10.91 (s, 1H), 8.47 (d, *J* = 19.5 Hz, 1H), 7.97 – 7.69 (m, 6H), 7.68 – 7.44 (m, 6H), 7.24 (s, 1H), 7.06 (d, *J* = 8.9 Hz, 1H), 7.01 (d, *J* = 8.3 Hz, 1H), 3.82 (s, 3H), 1.90 – 1.81 (m, 1H), 1.07 – 0.82 (m, 4H).

**<sup>13</sup>C NMR** (100 MHz, DMSO-*d*<sub>6</sub>) δ 160.22, 159.07, 140.17, 140.01, 135.06, 132.55, 132.13, 132.06, 131.86, 131.77, 131.27, 130.27, 128.78, 128.66, 122.42, 115.76, 115.13, 102.61, 99.40, 98.32, 85.80, 54.95, 15.70, 5.96.

**HRMS (ESI)** *m/z* Calcd for [C<sub>29</sub>H<sub>25</sub>N<sub>2</sub>NaO<sub>3</sub>P, M + Na]<sup>+</sup>: 503.1495, Found: 503.1491.

***Z*-*N'*-(1-(7-bromo-2-hydroxynaphthalen-1-yl)-4,4-dimethylpent-1-yn-3-ylidene)-*P*, *P*-diphenylphosphinic hydrazide (**3y**)**

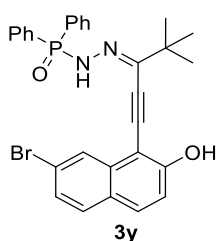

**Appearance:** white solid.

**<sup>1</sup>H NMR** (400 MHz, DMSO-*d*<sub>6</sub>) δ 11.21 (s, 1H), 8.52 (d, *J* = 20.6 Hz, 1H), 8.14 (s, 1H), 7.94 (d, *J* = 9.0 Hz, 1H), 7.89 – 7.75 (m, 5H), 7.65 – 7.48 (m, 7H), 7.29 (d, *J* = 9.0 Hz, 1H), 1.19 (s, 9H).

**<sup>13</sup>C NMR** (100 MHz, DMSO-*d*<sub>6</sub>) δ 159.80, 143.66, 143.51, 134.51, 132.66, 132.08, 131.73, 131.63, 131.39, 130.86, 128.61, 128.48, 126.78, 125.90, 125.62, 121.73, 118.38, 99.88, 98.24, 87.87, 36.94, 28.19.

**HRMS (ESI)** *m/z* Calcd for [C<sub>29</sub>H<sub>26</sub>BrN<sub>2</sub>NaO<sub>2</sub>P, M + Na]<sup>+</sup>: 567.0807, Found: 567.0801.

**(Z)-N'-(1-(6-bromo-2-hydroxynaphthalen-1-yl)-4,4-dimethylpent-1-yn-3-ylidene)-P, P-diphenylphosphinic hydrazide (3z)**

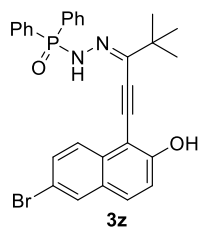

**Appearance:** white solid.

**<sup>1</sup>H NMR** (400 MHz, DMSO-*d*<sub>6</sub>) δ 11.53 (s, 1H), 8.49 (d, *J* = 20.7 Hz, 1H), 8.14 (s, 1H), 7.98 – 7.67 (m, 6H), 7.58 (dd, *J* = 19.6, 13.4 Hz, 7H), 7.41 – 7.21 (m, 2H), 1.19 (s, 9H).

**<sup>13</sup>C NMR** (100 MHz, DMSO-*d*<sub>6</sub>) δ 159.88, 144.00, 143.85, 132.63, 132.03, 131.82, 131.74, 131.65, 131.36, 131.06, 130.61, 130.30, 128.59, 128.47, 125.75, 119.05, 116.40, 100.67, 98.77, 87.77, 39.50, 36.89, 28.23.

**HRMS (ESI)** *m/z* Calcd for [C<sub>29</sub>H<sub>26</sub>BrN<sub>2</sub>NaO<sub>2</sub>P, M + Na]<sup>+</sup>: 567.0807, Found: 567.0812.

**(Z)-N'-(1-(7-bromo-2-hydroxynaphthalen-1-yl)-4-ethylhex-1-yn-3-ylidene)-P,P-diphenylphosphinic hydrazide (3aa)**

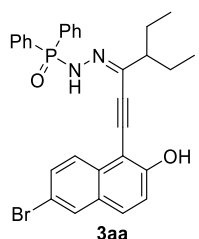

**Appearance:** white solid.

**<sup>1</sup>H NMR** (400 MHz, DMSO-*d*<sub>6</sub>) δ 11.10 (s, 1H), 8.64 (d, *J* = 21.0 Hz, 1H), 8.15 (s, 1H), 7.97 – 7.74 (m, 6H), 7.71 – 7.45 (m, 7H), 7.31 (d, *J* = 9.1 Hz, 1H), 2.18 (t, *J* = 9.4, 5.2 Hz, 1H), 1.71 – 1.46 (m, 4H), 0.80 (t, *J* = 7.3 Hz, 6H).

**<sup>13</sup>C NMR** (100 MHz, DMSO-*d*<sub>6</sub>) δ 159.83, 140.26, 140.11, 134.63, 132.61, 132.19, 132.11, 131.82, 131.72, 131.33, 130.87, 128.69, 128.57, 126.79, 125.91, 125.56, 121.76, 118.54, 99.76, 97.01, 87.78, 48.60, 39.50, 25.98, 11.73.

**HRMS (ESI)** *m/z* Calcd for [C<sub>30</sub>H<sub>28</sub>BrN<sub>2</sub>NaO<sub>2</sub>P, M + Na]<sup>+</sup>: 581.0964, Found: 581.0959.

### III. Optimization of the reaction conditions

Supplementary Table 1. Optimization of the reaction conditions for 2a<sup>a</sup>

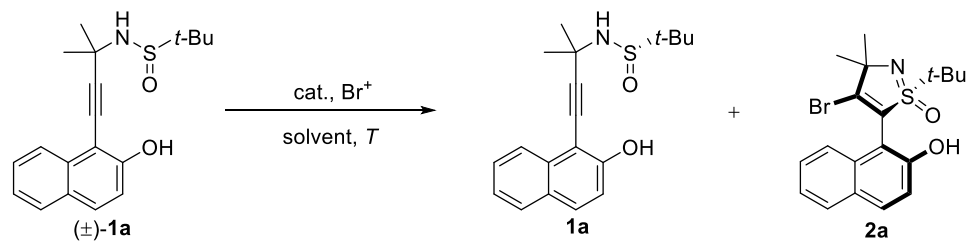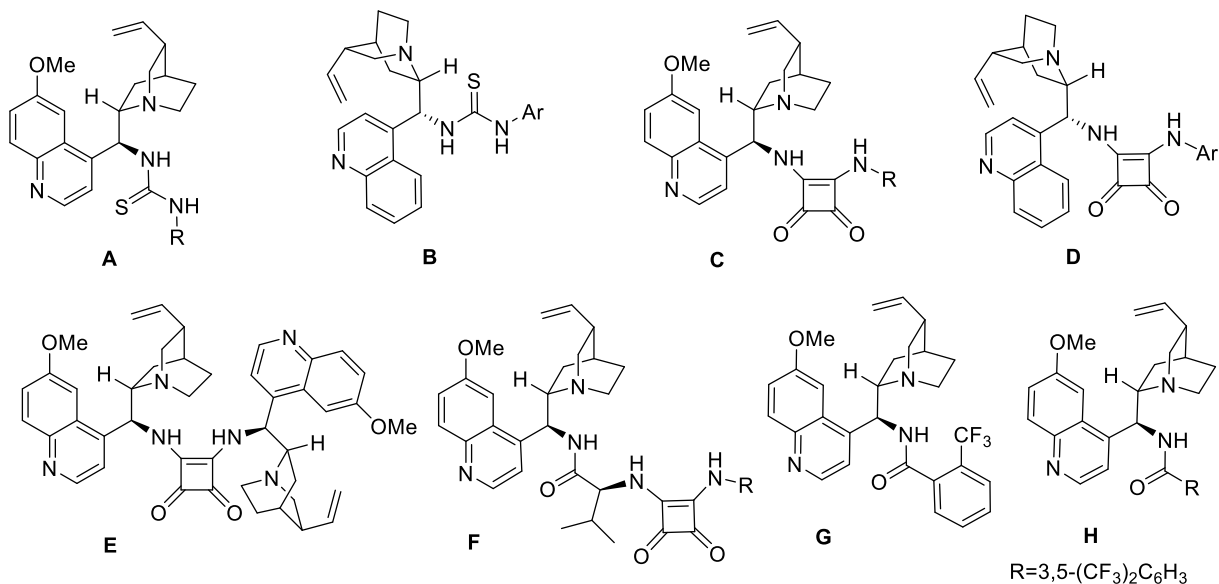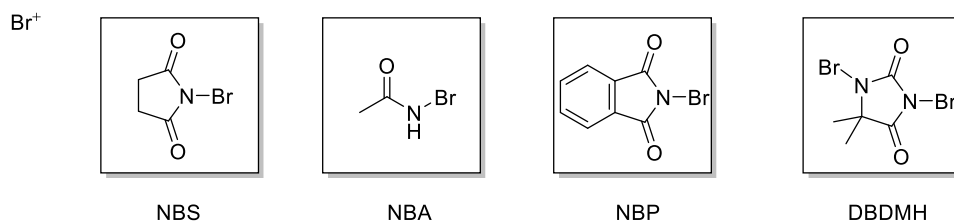

| entry | catalyst | solvent            | additive | <i>T</i><br>(°C) | d.r. <sup>b</sup> | ee (%) <sup>c</sup> |           | conv. (%) <sup>d</sup> | S <sup>e</sup> |
|-------|----------|--------------------|----------|------------------|-------------------|---------------------|-----------|------------------------|----------------|
|       |          |                    |          |                  |                   | <b>1a</b>           | <b>2a</b> |                        |                |
| 1     | <b>A</b> | toluene            | NBS      | -40              | >20:1             | < 5                 | < 5       | -                      | -              |
| 2     | <b>B</b> | toluene            | NBS      | -40              | >20:1             | 16                  | 36        | 31                     | <b>2</b>       |
| 3     | <b>C</b> | toluene            | NBS      | -40              | >20:1             | 9                   | -18       | 34                     | <b>2</b>       |
| 4     | <b>D</b> | toluene            | NBS      | -40              | >20:1             | 68                  | 86        | 44                     | <b>27</b>      |
| 5     | <b>E</b> | toluene            | NBS      | -40              | >20:1             | 26                  | 50        | 34                     | <b>4</b>       |
| 6     | <b>F</b> | toluene            | NBS      | -40              | >20:1             | -9                  | -13       | 41                     | <b>1</b>       |
| 7     | <b>G</b> | toluene            | NBS      | -40              | >20:1             | 26                  | 50        | 34                     | <b>4</b>       |
| 8     | <b>H</b> | toluene            | NBS      | -40              | >20:1             | -9                  | -13       | 41                     | <b>1</b>       |
|       | <b>F</b> | <i>m</i> -xylene   | NBS      | -40              | >20:1             | 48                  | 77        | 38                     | <b>12</b>      |
| 8     | <b>F</b> | Mesitylene         | NBS      | -40              | >20:1             | 22                  | 58        | 28                     | <b>5</b>       |
| 9     | <b>F</b> | <i>i</i> -PrOH     | NBS      | -40              | >20:1             | 12                  | 56        | 18                     | <b>4</b>       |
| 10    | <b>F</b> | CH <sub>3</sub> CN | NBS      | -40              | >20:1             | 25                  | 90        | 22                     | <b>24</b>      |
| 11    | <b>F</b> | EA                 | NBS      | -40              | >20:1             | 50                  | 73        | 41                     | <b>10</b>      |
| 12    | <b>F</b> | DCM                | NBS      | -40              | >20:1             | 74                  | 84        | 47                     | <b>25</b>      |
| 13    | <b>F</b> | THF                | NBS      | -40              | >20:1             | 16                  | 46        | 26                     | <b>3</b>       |
| 14    | <b>F</b> | DCM                | NBS      | 0                | >20:1             | 41                  | 79        | 34                     | <b>13</b>      |
| 15    | <b>F</b> | DCM                | NBS      | -40              | >20:1             | 74                  | 84        | 47                     | <b>25</b>      |
| 16    | <b>F</b> | DCM                | NBS      | -60              | >20:1             | 53                  | 93        | 36                     | <b>47</b>      |
| 14    | <b>F</b> | DCM                | NBS      | -78              | >20:1             | 76                  | 95        | 44                     | <b>90</b>      |
| 15    | <b>F</b> | DCM <sup>f</sup>   | NBS      | -78              | >20:1             | 70                  | 89        | 44                     | <b>36</b>      |
| 16    | <b>F</b> | DCM <sup>g</sup>   | NBS      | -78              | >20:1             | 80                  | 93        | 46                     | <b>68</b>      |
| 17    | <b>F</b> | DCM <sup>g</sup>   | NBA      | -78              | >20:1             | 3                   | 17        | 15                     | <b>2</b>       |
| 18    | <b>F</b> | DCM <sup>g</sup>   | NBP      | -78              | >20:1             | 71                  | 96        | 43                     | <b>104</b>     |
| 19    | <b>F</b> | DCM <sup>g</sup>   | DMDBH    | -78              | >20:1             | 38                  | 58        | 40                     | <b>5</b>       |

<sup>a</sup>Reaction conditions: (±)-**1a** (0.05 mmol), catalyst (10 mol%) in solvent (1.0 mL) at corresponding temperature for 10 min, then brominating reagents (0.0275 mmol, 0.55 equiv) were added at corresponding temperature, after the reaction was completed monitored by TLC, unless otherwise specified. Notes: *N*-bromosuccinimide (NBS); *N*-bromoacetamide (NBA); *N*-bromophthalimide (NBP); 1,3-dibromo-5,5-dimethylhydantoin (DBDMH). <sup>b</sup>Diastereomeric ratio (d.r.) was determined by HPLC. <sup>c</sup>Enantiomeric excess (ee) were determined by HPLC. <sup>d</sup>Conversion ratio was calculated by the methods of Fiaud: conv. = ee<sub>1a</sub>/(ee<sub>1a</sub> + ee<sub>2a</sub>). <sup>e</sup>Selectivity values were calculated by the methods of Fiaud: S = ln[(1 - conv.)(1 - ee<sub>1a</sub>)]/ln[(1 - conv.)(1 + ee<sub>1a</sub>)]. <sup>f</sup>0.5 mL DCM. <sup>g</sup>2.0 mL DCM.

**Supplementary Table 2. Optimization of the reaction conditions for 4a<sup>a</sup>**

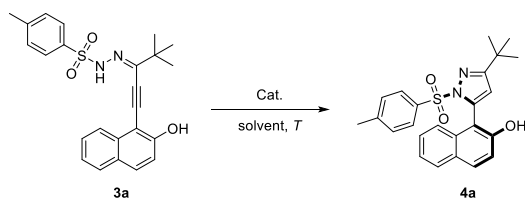

| entry | catalyst | solvent          | yield (%) <sup>b</sup> | ee (%) <sup>c</sup> |
|-------|----------|------------------|------------------------|---------------------|
| 1     | A        | DCM              | 80                     | 83                  |
| 2     | B        | DCM              | 75                     | -60                 |
| 3     | C        | DCM              | 83                     | 91                  |
| 4     | D        | DCM              | 81                     | -85                 |
| 5     | E        | DCM              | 79                     | 89                  |
| 6     | F        | DCM              | 70                     | -25                 |
| 7     | C        | DCE              | 80                     | 79                  |
| 8     | C        | chloroform       | 83                     | 75                  |
| 9     | C        | toluene          | 75                     | 68                  |
| 10    | C        | trifluorotoluene | 70                     | 61                  |
| 11    | C        | acetone          | 82                     | 47                  |
| 12    | C        | THF              | 81                     | 20                  |
| 13    | C        | 1,4-dioxane      | 70                     | 26                  |
| 14    | C        | acetonitrile     | 75                     | 10                  |
| 15    | C        | DCM <sup>d</sup> | 80                     | 89                  |
| 16    | C        | DCM <sup>e</sup> | 82                     | 87                  |

<sup>a</sup>Reaction conditions: **3a** (0.05 mmol), catalyst (10 mol%) in solvent (2.0 mL) at 25 °C for 12 h, unless otherwise specified. <sup>b</sup>Isolated yield after purification by silica gel column chromatography. <sup>c</sup>Enantiomeric excess (ee) were determined by HPLC. <sup>d</sup>1.0 mL DCM. <sup>e</sup>4.0 mL DCM.

Supplementary Table 3. Optimization of the reaction conditions for 4q<sup>a</sup>

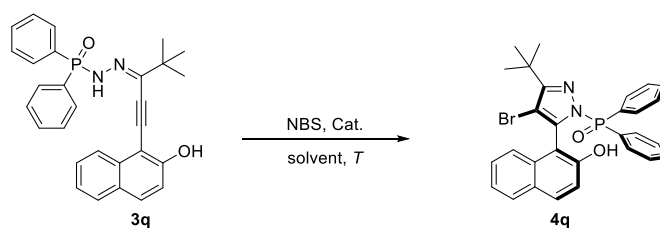

| entry | catalyst       | solvent              | <i>T</i> (°C) | yield (%) <sup>b</sup> | ee (%) <sup>c</sup> |
|-------|----------------|----------------------|---------------|------------------------|---------------------|
| 1     | A              | DCM                  | -40           | 75                     | 11                  |
| 2     | B              | DCM                  | -40           | 77                     | -13                 |
| 3     | C              | DCM                  | -40           | 77                     | 24                  |
| 4     | D              | DCM                  | -40           | 73                     | -24                 |
| 5     | E              | DCM                  | -40           | 75                     | 55                  |
| 6     | E              | DCE                  | -40           | 71                     | 40                  |
| 7     | E              | chloroform           | -40           | 75                     | 64                  |
| 8     | E              | toluene              | -40           | 74                     | 96                  |
| 9     | E              | chlorobenzene        | -40           | 70                     | 71                  |
| 10    | E              | acetone              | -40           | 75                     | 49                  |
| 11    | E              | acetonitrile         | -40           | 70                     | 78                  |
| 12    | E              | THF                  | -40           | 72                     | 13                  |
| 13    | E              | toluene              | -60           | 75                     | 92                  |
| 14    | E              | toluene              | -20           | 76                     | 92                  |
| 15    | E              | toluene              | 25            | 74                     | 94                  |
| 16    | E              | toluene <sup>d</sup> | 25            | 74                     | 94                  |
| 17    | E              | toluene <sup>e</sup> | 25            | 75                     | 90                  |
| 18    | E <sup>f</sup> | toluene              | 25            | 74                     | 92                  |
| 19    | E <sup>g</sup> | toluene              | 25            | 76                     | 91                  |

<sup>a</sup>Reaction conditions: 3a (0.05 mmol), catalyst (20 mol%), NBS (0.0525 mmol) in solvent (2.0 mL) at corresponding temperature for 1 h, unless otherwise specified. <sup>b</sup>Isolated yields after purification by silica gel column chromatography. <sup>c</sup>The ee value was determined by HPLC analysis. <sup>d</sup>1.0 mL toluene. <sup>e</sup>4.0 mL toluene. <sup>f</sup>10 mol% catalyst. <sup>g</sup>5 mol% catalyst.



## IV. General procedure for the asymmetric reaction

### General procedure for the asymmetric synthesis of compounds 2a-2x

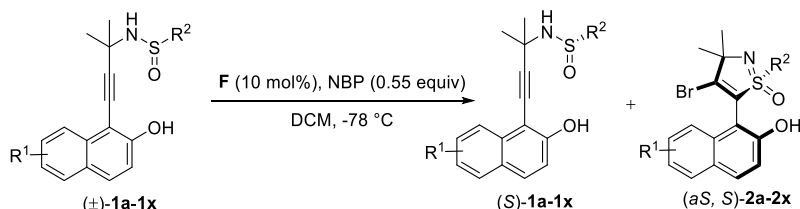

A flame-dried Schlenk tube equipped with a magnetic stirring bar, was charged with **(±)-1a-1x** (0.3 mmol, 1.0 equiv), and catalyst **F** (10 mol%), DCM (12.0 mL) was injected into the tube at -78 °C. After stirring for 10min, the NBP (0.165 mmol, 0.55 equiv) was added into the mixture, after the reaction was completed, monitored by TLC. The reaction was quenched with saturated ammonium chloride solution, and extracted with DCM (3×5.0 mL), all organic layer was removed under reduced pressure, and the residue was purified by column chromatography (PE:EA=3:1-6:1) to afford *(S)*-**1a-1x** and *(aS, S)*-**2a-2x**. Racemic samples were prepared without the addition of the catalyst.

### Analytical dates of 1a-1x and 2a-2x

#### *(S)*-*N*-(4-(2-hydroxynaphthalen-1-yl)-2-methylbut-3-yn-2-yl)-2-methylpropane-2-sulfonamide (**1a**)

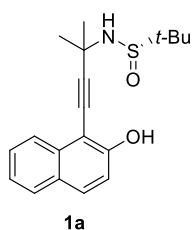

**Appearance:** white solid.

**Yield:** 46%, 45 mg. **ee** = 71%.

**<sup>1</sup>H NMR** (400 MHz, CDCl<sub>3</sub>) δ 9.35 (s, 1H), 8.01 (d, *J* = 8.3 Hz, 1H), 7.70 (d, *J* = 8.1 Hz, 1H), 7.66 (d, *J* = 8.9 Hz, 1H), 7.47 (t, *J* = 7.6 Hz, 1H), 7.29 (t, *J* = 7.5 Hz, 1H), 7.15 (d, *J* = 8.9 Hz, 1H), 3.56 (s, 1H), 1.67 (s, 3H), 1.66 (s, 3H), 1.25 (s, 9H).

**<sup>13</sup>C NMR** (100 MHz, CDCl<sub>3</sub>) δ 158.80, 133.46, 130.09, 127.97, 127.78, 126.69, 124.37, 123.25, 118.39, 103.13, 101.53, 78.64, 55.83, 49.97, 31.39, 29.82, 22.26.

**HRMS (ESI)** *m/z* Calcd for [C<sub>19</sub>H<sub>23</sub>NNaO<sub>2</sub>S, M + Na]<sup>+</sup>: 352.1342, Found: 352.1347.

**Optical Rotation:** [α]<sub>D</sub><sup>25</sup> = 118.3° (*c* = 1.0, DCM).

**HPLC analysis:** Chiralcel IA-H (Hexane/*i*-PrOH = 93:7, flow rate = 1.0 mL/min, wave length = 254 nm), *t<sub>R</sub>* = 5.640 min (minor), *t<sub>R</sub>* = 8.700 min (major).

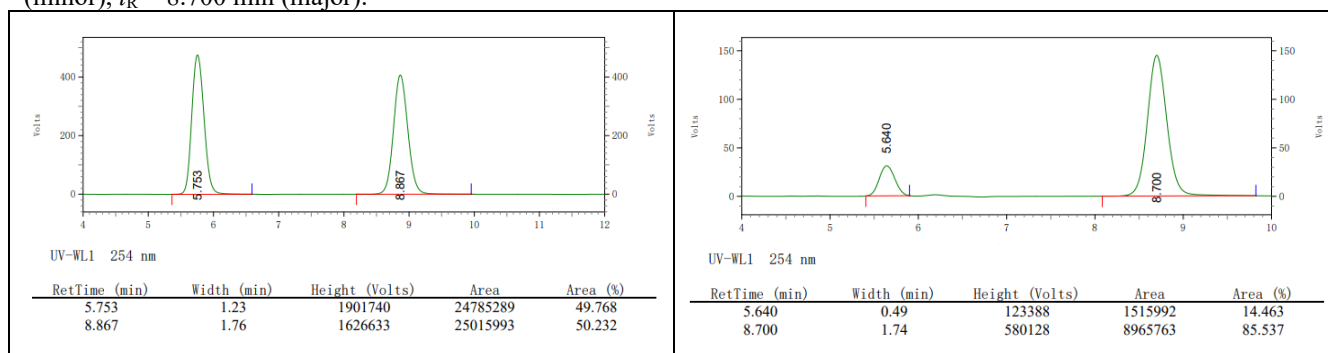

**(*αS, S*)-4-bromo-1-(*tert*-butyl)-5-(2-hydroxynaphthalen-1-yl)-3,3-dimethyl-3H-1λ<sup>6</sup>-isothiazole 1-oxide(2a)**

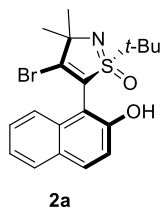

2a

**Appearance:** white solid.

**Yield:** 44%, 50 mg. **ee** = 96%.

**<sup>1</sup>H NMR** (400 MHz, CDCl<sub>3</sub>) δ 9.00 (s, 1H), 7.84 (d, *J* = 8.5 Hz, 2H), 7.54 – 7.47 (m, 1H), 7.45 (d, *J* = 8.2 Hz, 1H), 7.39 (t, *J* = 7.1 Hz, 1H), 7.25 (d, *J* = 9.0 Hz, 1H), 1.71 (s, 3H), 1.63 (s, 3H), 1.34 (s, 9H).

**<sup>13</sup>C NMR** (100 MHz, CDCl<sub>3</sub>) δ 156.74, 154.30, 132.27, 130.50, 130.11, 129.06, 127.31, 123.66, 123.36, 120.16, 108.28, 63.12, 30.67, 29.00, 24.27.

**HRMS (ESI)** *m/z* Calcd for [C<sub>19</sub>H<sub>22</sub>BrNNaO<sub>2</sub>S, M + Na]<sup>+</sup>: 430.0447, Found: 430.0452.

**Optical Rotation:** 150.4° (*c* = 1.0, DCM).

**HPLC analysis:** Chiralcel OJ-H (Hexane/*i*-PrOH = 96.5:3.5, flow rate = 1.0 mL/min, wave length = 254 nm), *t<sub>R</sub>* = 5.170 min (major), *t<sub>R</sub>* = 7.397 min (minor).

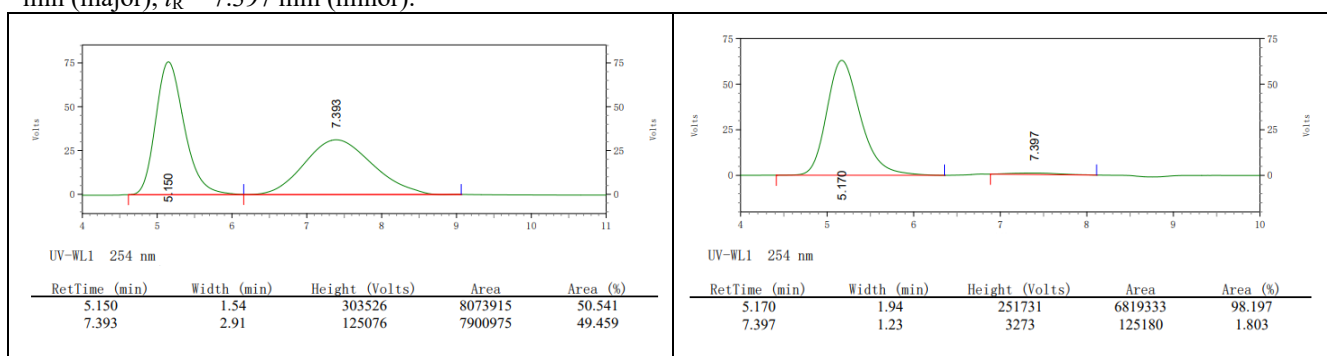

**(*S*)-*N*-(4-(2-hydroxy-3-methoxynaphthalen-1-yl)-2-methylbut-3-yn-2-yl)-2-methylpropane-2-sulfonamide(1b)**

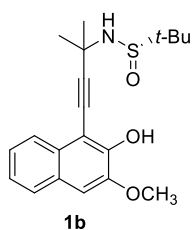

1b

**Appearance:** white solid.

**Yield:** 53%, 56 mg. **ee** = 31%.

**<sup>1</sup>H NMR** (400 MHz, CDCl<sub>3</sub>) δ 9.63 (s, 1H), 7.94 (d, *J* = 8.3 Hz, 1H), 7.68 – 7.60 (m, 1H), 7.36 (ddd, *J* = 8.2, 6.9, 1.4 Hz, 1H), 7.30 (ddd, *J* = 8.1, 6.9, 1.5 Hz, 1H), 7.08 (s, 1H), 3.97 (s, 3H), 3.53 (s, 1H), 1.69 (s, 6H), 1.26 (s, 9H).

**<sup>13</sup>C NMR** (100 MHz, CDCl<sub>3</sub>) δ 151.02, 148.94, 128.61, 128.23, 126.62, 124.42, 124.21, 123.90, 107.51, 103.07, 102.62, 78.76, 55.81, 50.19, 31.44, 30.01, 22.37.

**HRMS (ESI)** *m/z* Calcd for [C<sub>20</sub>H<sub>25</sub>NNaO<sub>3</sub>S, M + Na]<sup>+</sup>: 382.1447, Found: 382.1442.

**Optical Rotation:** [α]<sub>D</sub><sup>25</sup> = 67.4° (*c* = 1.0, DCM).

**HPLC analysis:** Chiralcel AD-H (Hexane/*i*-PrOH = 90: 10, flow rate = 1.0 mL/min, wave length = 254 nm), *t<sub>R</sub>* = 9.243 min (minor), *t<sub>R</sub>* = 10.463 min (major).

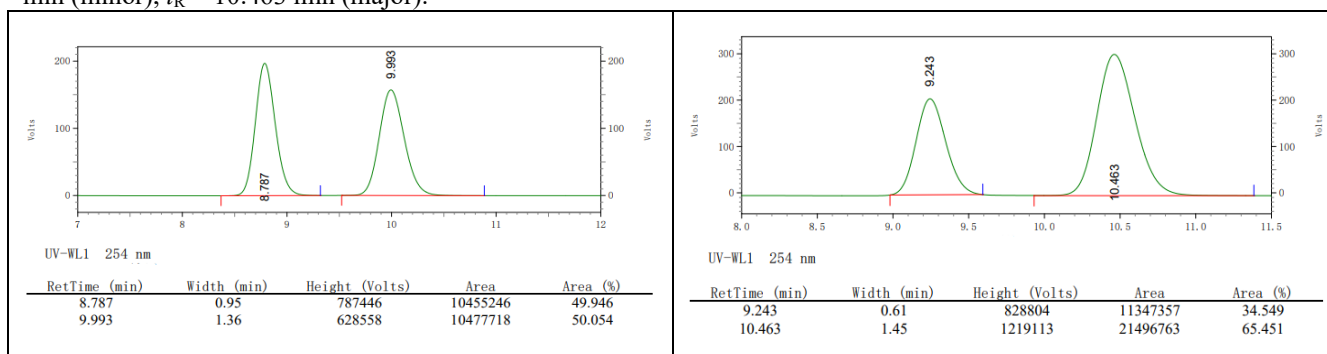

**(*a,S,S*)-4-bromo-1-(*tert*-butyl)-5-(2-hydroxy-3-methoxynaphthalen-1-yl)-3,3-dimethyl-3H-1 $\lambda$ <sup>6</sup>-isothiazole 1-oxide(2b)**

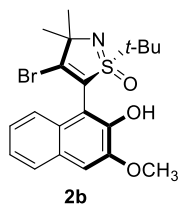

**Appearance:** white solid.

**Yield:** 23%, 30 mg. **ee** = 96%.

**<sup>1</sup>H NMR** (400 MHz, CDCl<sub>3</sub>) δ 9.17 (s, 1H), 7.76 (dd, *J* = 6.7, 3.4 Hz, 1H), 7.38 (d, *J* = 3.4 Hz, 3H), 7.23 (s, 1H), 4.02 (s, 3H), 1.71 (s, 3H), 1.62 (s, 3H), 1.34 (s, 9H).

**<sup>13</sup>C NMR** (100 MHz, CDCl<sub>3</sub>) δ 157.04, 149.35, 146.38, 129.82, 129.42, 127.63, 125.27, 124.91, 124.29, 123.18, 109.51, 108.89, 63.16, 55.87, 30.67, 28.88, 24.29.

**HRMS (ESI)** *m/z* Calcd for [C<sub>20</sub>H<sub>24</sub>BrNNaO<sub>3</sub>S, M + Na]<sup>+</sup>: 460.0552, Found: 460.0559.

**Optical Rotation:** [α]<sub>D</sub><sup>25</sup> = 124.7° (*c* = 1.0, DCM).

**HPLC analysis:** Chiralcel OD-H (Hexane/*i*-PrOH = 85:15, flow rate = 1.0 mL/min, wave length = 254 nm), *t*<sub>R</sub> = 5.297 min (major), *t*<sub>R</sub> = 5.873 min (minor).

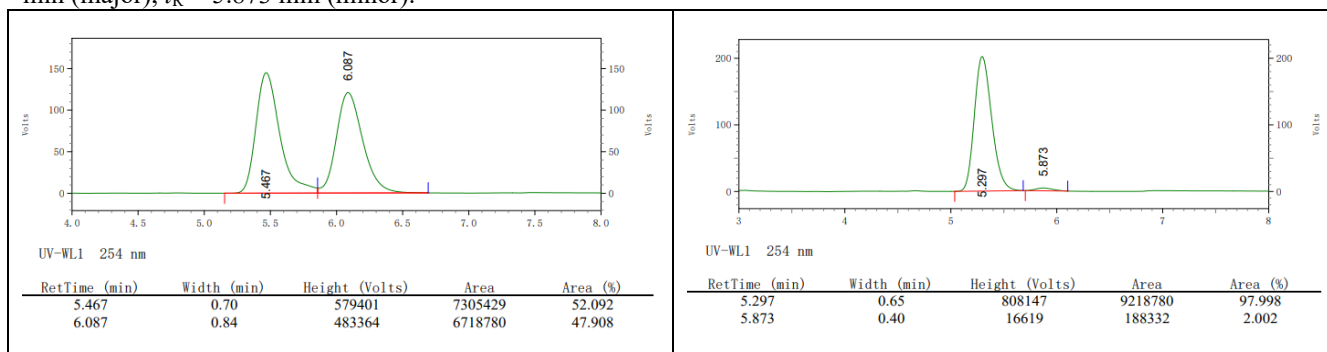

**(*S*)-*N*-(4-(6-ethyl-2-hydroxynaphthalen-1-yl)-2-methylbut-3-yn-2-yl)-2-methylpropane-2-sulfinamide (1c)**

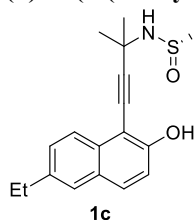

**Appearance:** white solid.

**Yield:** 46%, 49 mg. **ee** = 82%.

**<sup>1</sup>H NMR** (400 MHz, CDCl<sub>3</sub>) δ 9.18 (s, 1H), 7.93 (d, *J* = 8.5 Hz, 1H), 7.61 (d, *J* = 8.9 Hz, 1H), 7.50 (d, *J* = 1.7 Hz, 1H), 7.34 (dd, *J* = 8.6, 1.8 Hz, 1H), 7.11 (d, *J* = 8.9 Hz, 1H), 3.52 (s, 1H), 2.76 (q, *J* = 7.6 Hz, 2H), 1.68 (d, *J* = 3.1 Hz, 6H), 1.30 (d, *J* = 7.6 Hz, 3H), 1.27 (s, 9H).

**<sup>13</sup>C NMR** (100 MHz, CDCl<sub>3</sub>) δ 158.34, 139.12, 131.91, 129.70, 128.10, 127.87, 125.89, 124.44,

118.38, 102.95, 101.49, 78.96, 55.91, 50.10, 31.58, 29.93, 28.66, 22.39, 15.59.

**HRMS (ESI)** *m/z* Calcd for [C<sub>21</sub>H<sub>27</sub>NNaO<sub>2</sub>S, M + Na]<sup>+</sup>: 380.1655, Found: 380.1650.

**Optical Rotation:** [α]<sub>D</sub><sup>25</sup> = 15.0° (*c* = 1.0, DCM).

**HPLC analysis:** Chiralcel OD-H (Hexane/*i*-PrOH = 85:15, flow rate = 1.0 mL/min, wave length = 254 nm), *t*<sub>R</sub> = 3.970 min (minor), *t*<sub>R</sub> = 5.193 min (major).

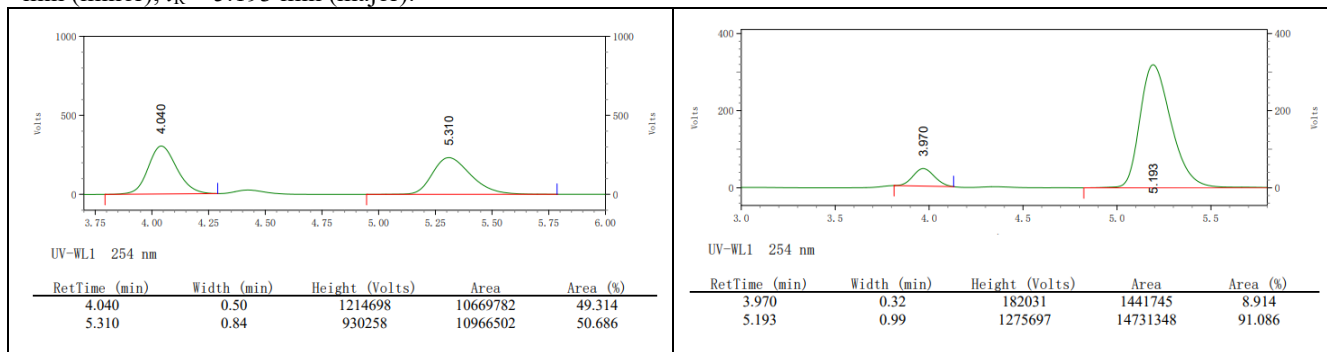

**(aS, S)-4-bromo-1-(tert-butyl)-5-(6-ethyl-2-hydroxynaphthalen-1-yl)-3,3-dimethyl-3H-1λ<sup>6</sup>-isothiazole 1-oxide (2c)**

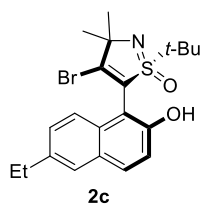

**Appearance:** white solid.

**Yield:** 45%, 58.7 mg. **ee** = 90%.

**<sup>1</sup>H NMR** (400 MHz, CDCl<sub>3</sub>) δ 8.91 (s, 1H), 7.78 (d, *J* = 8.8 Hz, 1H), 7.63 (s, 1H), 7.37 (s, 2H), 7.22 (d, *J* = 8.9 Hz, 1H), 2.80 (q, *J* = 7.4 Hz, 2H), 1.71 (s, 3H), 1.62 (s, 3H), 1.34 (s, 12H).

**<sup>13</sup>C NMR** (100 MHz, CDCl<sub>3</sub>) δ 156.50, 153.64, 139.42, 134.26, 131.80, 130.25, 129.26, 128.81, 128.45, 126.83, 123.54, 123.38, 120.06, 108.16, 63.09, 30.66, 29.01, 28.44, 24.29, 15.18.

**HRMS (ESI)** *m/z* Calcd for [C<sub>21</sub>H<sub>26</sub>BrNNaO<sub>2</sub>S, M + Na]<sup>+</sup>: 458.0760, Found: 458.0754.

**Optical Rotation:** [α]<sub>D</sub><sup>25</sup> = 130.5° (*c* = 1.0, DCM).

**HPLC analysis:** Chiralcel AD-H (Hexane/*i*-PrOH = 99:1, flow rate = 1.0 mL/min, wave length = 254 nm), *t*<sub>R</sub> = 14.673 min (minor), *t*<sub>R</sub> = 16.830 min (major).

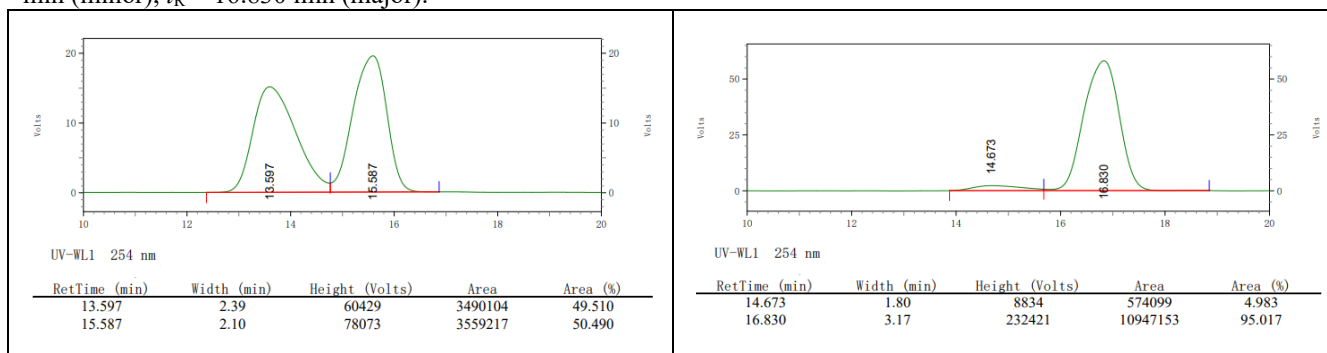

**(S)-N-(4-(2-hydroxy-6-phenylnaphthalen-1-yl)-2-methylbut-3-yn-2-yl)-2-methylpropane-2-sulfinamide (1d)**

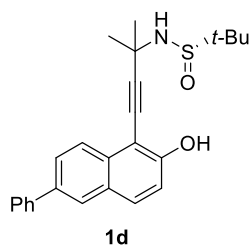

**Appearance:** white solid.

**Yield:** 50%, 60.8 mg. **ee** = 74%.

**<sup>1</sup>H NMR** (400 MHz, CDCl<sub>3</sub>) δ 9.36 (s, 1H), 8.07 (d, *J* = 8.6 Hz, 1H), 7.96 – 7.90 (m, 1H), 7.80 – 7.70 (m, 2H), 7.68 (d, *J* = 7.8 Hz, 2H), 7.46 (t, *J* = 7.6 Hz, 2H), 7.35 (t, *J* = 7.4 Hz, 1H), 7.18 (d, *J* = 8.9 Hz, 1H), 3.55 (s, 1H), 1.70 (d, *J* = 2.5 Hz, 6H), 1.28 (s, 9H).

**<sup>13</sup>C NMR** (100 MHz, CDCl<sub>3</sub>) δ 159.04, 141.07, 136.11, 132.80, 130.47, 128.78, 128.14, 127.15, 127.02, 126.35, 126.03, 125.06, 118.97, 103.19, 101.59, 78.78, 55.96, 50.13, 31.56, 29.92, 22.40.

**HRMS (ESI)** *m/z* Calcd for [C<sub>25</sub>H<sub>27</sub>NNaO<sub>2</sub>S, M + Na]<sup>+</sup>: 428.1655, Found: 428.1660.

**Optical Rotation:** [α]<sub>D</sub><sup>25</sup> = 44.0° (*c* = 1.0, DCM).

**HPLC analysis:** Chiralcel IA-H (Hexane/*i*-PrOH = 85:15, flow rate = 1.0 mL/min, wave length = 254 nm), *t*<sub>R</sub> = 4.903 min (minor), *t*<sub>R</sub> = 8.563 min (major).

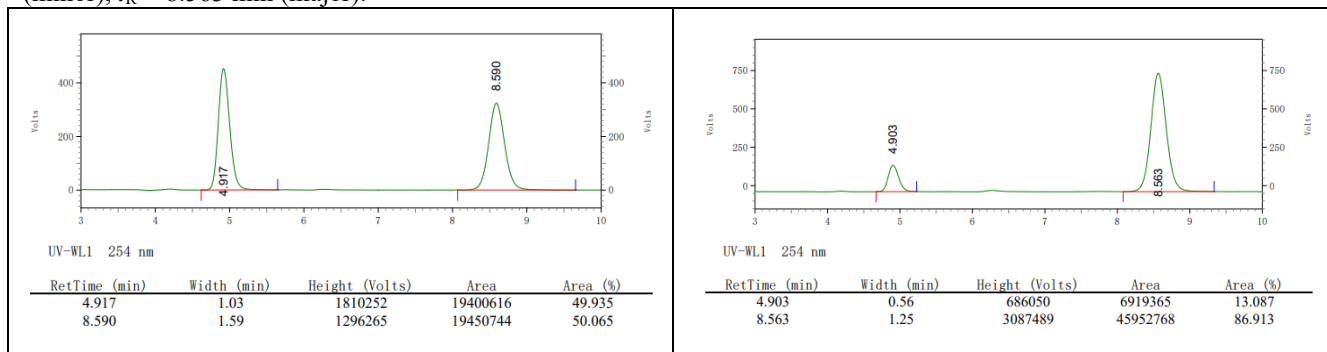

**(*aS*, *S*)-4-bromo-1-(*tert*-butyl)-5-(2-hydroxy-6-phenylnaphthalen-1-yl)-3,3-dimethyl-3H-1 $\lambda$ -isothiazole 1-oxide (2d)**

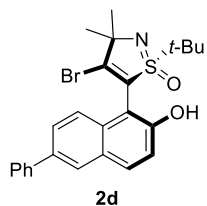

**Appearance:** white solid.

**Yield:** 42%, 60.8 mg. **ee** = 95%.

**<sup>1</sup>H NMR** (400 MHz, CDCl<sub>3</sub>)  $\delta$  9.04 (s, 1H), 8.08 – 8.01 (m, 1H), 7.88 (dd,  $J$  = 12.2, 7.4 Hz, 2H), 7.83 – 7.73 (m, 2H), 7.71 (d,  $J$  = 7.7 Hz, 2H), 7.58 – 7.43 (m, 3H), 7.37 (t,  $J$  = 7.3 Hz, 1H), 7.26 (s, 1H), 1.73 (s, 3H), 1.64 (s, 3H), 1.36 (s, 9H).

**<sup>13</sup>C NMR** (100 MHz, CDCl<sub>3</sub>)  $\delta$  167.93, 156.80, 154.39, 140.37, 136.40, 134.26, 132.54, 130.08, 129.69, 129.34, 128.88, 127.34, 127.09, 126.90, 126.85, 123.99, 123.54, 120.63, 108.25, 63.16, 30.67, 29.02, 24.31.

**HRMS (ESI)**  $m/z$  Calcd for [C<sub>25</sub>H<sub>26</sub>BrNNaO<sub>2</sub>S, M + Na]<sup>+</sup>: 506.0760, Found: 506.0767.

**Optical Rotation:** [ $\alpha$ ]<sub>D</sub><sup>25</sup> = 50.4° ( $c$  = 1.0, DCM).

**HPLC analysis:** Chiralcel IC-H (Hexane/*i*-PrOH = 85:15, flow rate = 1.0 mL/min, wave length = 254 nm),  $t_R$  = 8.737 min (minor),  $t_R$  = 13.577 min (major).

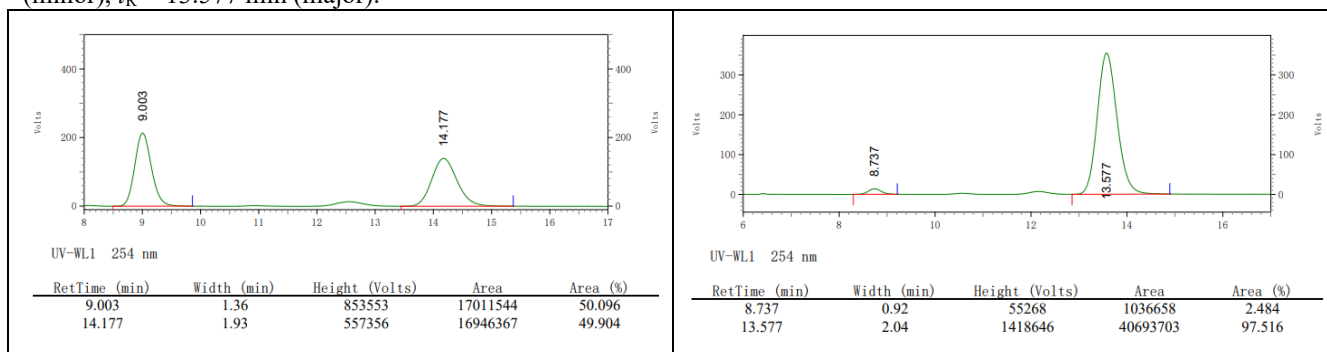

**(*S*)-*N*-(4-(6-bromo-2-hydroxynaphthalen-1-yl)-2-methylbut-3-yn-2-yl)-2-methylpropane-2-sulfinamide (1e)**

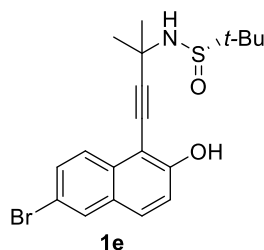

**Appearance:** white solid.

**Yield:** 49%, 60 mg. **ee** = 82%.

**<sup>1</sup>H NMR** (400 MHz, CDCl<sub>3</sub>)  $\delta$  9.45 (s, 1H), 7.86 (d,  $J$  = 8.7 Hz, 2H), 7.56 (d,  $J$  = 9.0 Hz, 1H), 7.51 (dd,  $J$  = 8.9, 1.7 Hz, 1H), 7.15 (d,  $J$  = 9.0 Hz, 1H), 3.54 (s, 1H), 1.68 (d,  $J$  = 2.6 Hz, 6H), 1.27 (s, 9H).

**<sup>13</sup>C NMR** (100 MHz, CDCl<sub>3</sub>)  $\delta$  159.15, 132.10, 129.92, 129.11, 126.33, 119.66, 116.86, 103.53, 101.87, 78.31, 55.97, 50.05, 31.44, 29.81, 22.35.

**HRMS (ESI)**  $m/z$  Calcd for [C<sub>19</sub>H<sub>22</sub>BrNNaO<sub>2</sub>S, M + Na]<sup>+</sup>: 430.0447, Found: 430.0450.

**Optical Rotation:** [ $\alpha$ ]<sub>D</sub><sup>25</sup> = 34.0° ( $c$  = 1.0, DCM).

**HPLC analysis:** Chiralcel IA-H (Hexane/*i*-PrOH = 85:15, flow rate = 1.0 mL/min, wave length = 254 nm),  $t_R$  = 4.127 min (minor),  $t_R$  = 7.377 min (major).

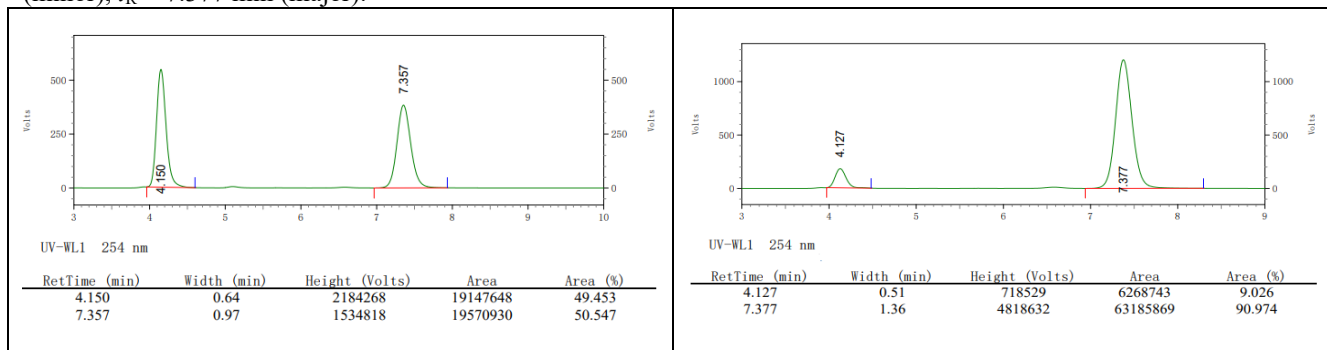

**(aS, S)-4-bromo-5-(6-bromo-2-hydroxynaphthalen-1-yl)-1-(tert-butyl)-3,3-dimethyl-3H-1λ<sup>6</sup>-isothiazole 1-oxide (2e)**

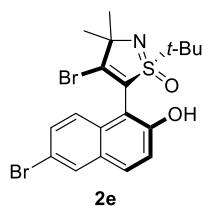

**Appearance:** white solid.

**Yield:** 43%, 62.8 mg. **ee** = 94%.

**<sup>1</sup>H NMR** (400 MHz, CDCl<sub>3</sub>) δ 9.09 (s, 1H), 7.99 (d, *J* = 1.7 Hz, 1H), 7.75 (d, *J* = 9.0 Hz, 1H), 7.57 (dd, *J* = 9.0, 1.9 Hz, 1H), 7.31 (d, *J* = 9.0 Hz, 1H), 7.29 – 7.23 (m, 1H), 1.71 (s, 3H), 1.61 (s, 3H), 1.33 (s, 9H).

**<sup>13</sup>C NMR** (100 MHz, CDCl<sub>3</sub>) δ 157.14, 154.63, 131.27, 131.11, 130.53, 130.17, 129.74, 129.12, 125.17, 121.44, 117.40, 108.56, 63.16, 30.63, 28.99, 24.28.

**HRMS (ESI)** *m/z* Calcd for [C<sub>19</sub>H<sub>21</sub>Br<sub>2</sub>NNaO<sub>2</sub>S, M + Na]<sup>+</sup>: 507.9552, Found: 507.9550.

**Optical Rotation:** [α]<sub>D</sub><sup>25</sup> = 80.4° (*c* = 1.0, DCM).

**HPLC analysis:** Chiralcel IC-H (Hexane/*i*-PrOH = 94:6, flow rate = 1.0 mL/min, wave length = 254 nm), *t*<sub>R</sub> = 11.577 min (minor), *t*<sub>R</sub> = 16.223 min (major).

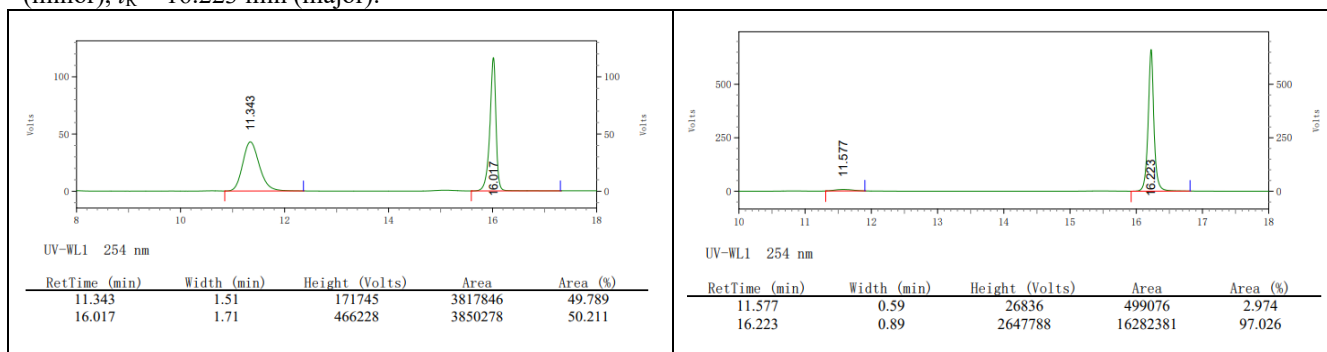

**(S)-N-(4-(2-hydroxy-7-methoxynaphthalen-1-yl)-2-methylbut-3-yn-2-yl)-2-methylpropane-2-sulfonamide (1f)**

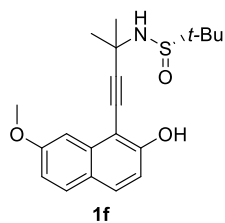

**Appearance:** white solid.

**Yield:** 41%, 44 mg. **ee** = 82 %.

**<sup>1</sup>H NMR** (400 MHz, CDCl<sub>3</sub>) δ 9.21 (s, 1H), 7.60 (t, *J* = 8.8 Hz, 2H), 7.34 (d, *J* = 1.9 Hz, 1H), 7.06 – 6.89 (m, 2H), 3.92 (s, 3H), 3.53 (s, 1H), 1.68 (d, *J* = 4.6 Hz, 6H), 1.27 (s, 9H).

**<sup>13</sup>C NMR** (100 MHz, CDCl<sub>3</sub>) δ 159.43, 158.70, 135.07, 130.01, 129.67, 123.23, 115.94, 114.89, 104.11, 103.29, 100.87, 78.92, 55.95, 55.14, 50.10, 31.69, 30.02, 22.40.

**HRMS (ESI)** *m/z* Calcd for [C<sub>20</sub>H<sub>25</sub>NNaO<sub>3</sub>S, M + Na]<sup>+</sup>: 382.1447, Found: 382.1450.

**Optical Rotation:** [α]<sub>D</sub><sup>25</sup> = 34.3° (*c* = 1.0, DCM).

**HPLC analysis:** Chiralcel IA-H (Hexane/*i*-PrOH = 85:15, flow rate = 1.0 mL/min, wave length = 254 nm), *t*<sub>R</sub> = 4.377 min (minor), *t*<sub>R</sub> = 5.933 min (major).

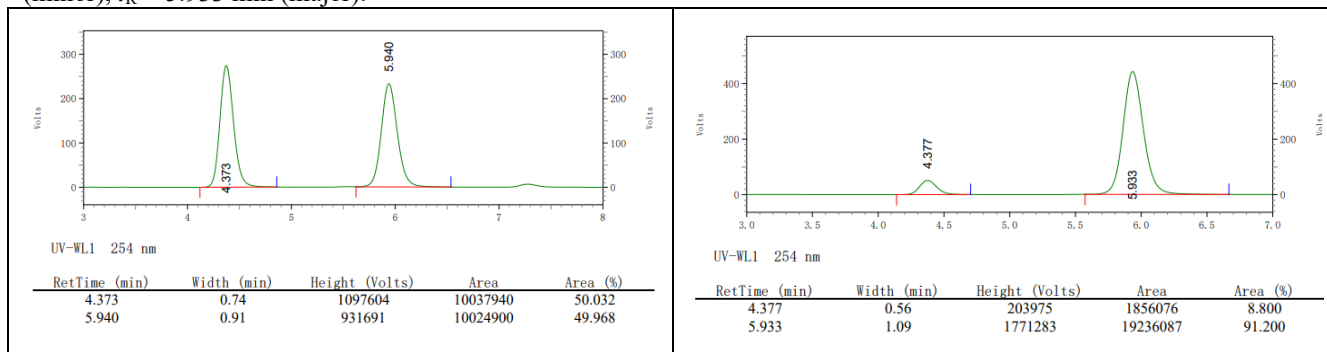

**(*aS,S*)-4-bromo-1-(tert-butyl)-5-(2-hydroxy-7-methoxynaphthalen-1-yl)-3,3-dimethyl-3H-1 $\lambda$ <sup>6</sup>-isothiazole 1-oxide (2f)**

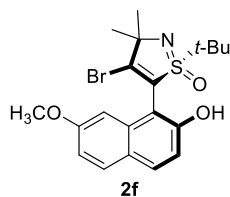

**Appearance:** white solid.

**Yield:** 43%, 56 mg. **ee** = 92%.

**<sup>1</sup>H NMR** (400 MHz, CDCl<sub>3</sub>)  $\delta$  8.91 (s, 1H), 7.74 (t, *J* = 10.0 Hz, 2H), 7.06 (dd, *J* = 20.2, 8.4 Hz, 2H), 6.77 (s, 1H), 3.81 (s, 3H), 1.72 (s, 3H), 1.61 (s, 3H), 1.36 (s, 9H).

**<sup>13</sup>C NMR** (100 MHz, CDCl<sub>3</sub>)  $\delta$  158.90, 156.36, 154.93, 132.00, 130.53, 124.21, 117.47, 115.75, 107.46, 102.91, 63.04, 54.93, 30.47, 29.13, 24.29.

**HRMS (ESI)** *m/z* Calcd for [C<sub>20</sub>H<sub>24</sub>BrNNaO<sub>3</sub>S, M + Na]<sup>+</sup>: 460.0552, Found: 460.0557.

**Optical Rotation:** [ $\alpha$ ]<sub>D</sub><sup>25</sup> = 80.6° (*c* = 1.0, DCM).

**HPLC analysis:** Chiralcel AD-H (Hexane/*i*-PrOH = 97:3, flow rate = 1.0 mL/min, wave length = 254 nm), *t*<sub>R</sub> = 10.140 min (minor), *t*<sub>R</sub> = 11.063 min (major).

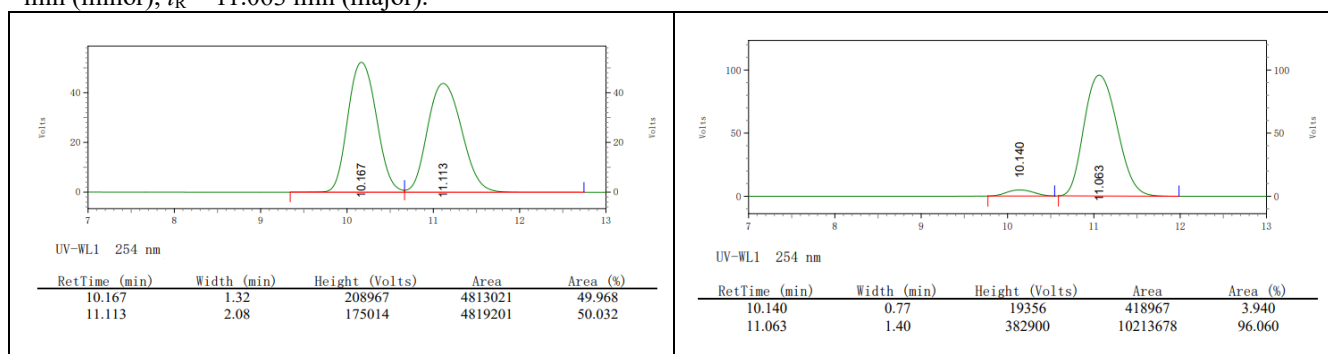

**(*S*)-*N*-(4-(2-hydroxy-7-phenylnaphthalen-1-yl)-2-methylbut-3-yn-2-yl)-2-methylpropane-2-sulfinamide (1g)**

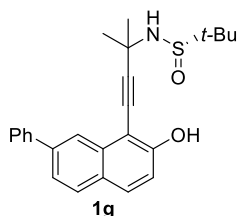

**Appearance:** white solid.

**Yield:** 50%, 60.8 mg. **ee** = 66%.

**<sup>1</sup>H NMR** (400 MHz, CDCl<sub>3</sub>)  $\delta$  9.33 (s, 1H), 8.20 (s, 1H), 7.79 (d, *J* = 8.4 Hz, 1H), 7.71 (t, *J* = 8.8 Hz, 3H), 7.56 (d, *J* = 8.4 Hz, 1H), 7.50 (t, *J* = 7.5 Hz, 2H), 7.39 (t, *J* = 7.3 Hz, 1H), 7.16 (d, *J* = 9.1 Hz, 1H), 3.56 (s, 1H), 1.70 (d, *J* = 4.8 Hz, 6H), 1.28 (s, 9H).

**<sup>13</sup>C NMR** (100 MHz, CDCl<sub>3</sub>)  $\delta$  159.30, 141.59, 139.52, 133.82, 129.91, 128.80, 128.56, 127.50, 127.25, 127.13, 123.14, 122.58, 118.55, 103.52, 101.93, 78.76, 55.95, 50.14, 31.62, 29.91, 22.39.

**HRMS (ESI)** *m/z* Calcd for [C<sub>25</sub>H<sub>27</sub>NNaO<sub>2</sub>S, M + Na]<sup>+</sup>: 428.1655, Found: 428.1650.

**Optical Rotation:** [ $\alpha$ ]<sub>D</sub><sup>25</sup> = 90.2° (*c* = 1.0, DCM).

**HPLC analysis:** Chiralcel IA-H (Hexane/*i*-PrOH = 85:15, flow rate = 1.0 mL/min, wave length = 254 nm), *t*<sub>R</sub> = 4.197 min (minor), *t*<sub>R</sub> = 6.273 min (major).

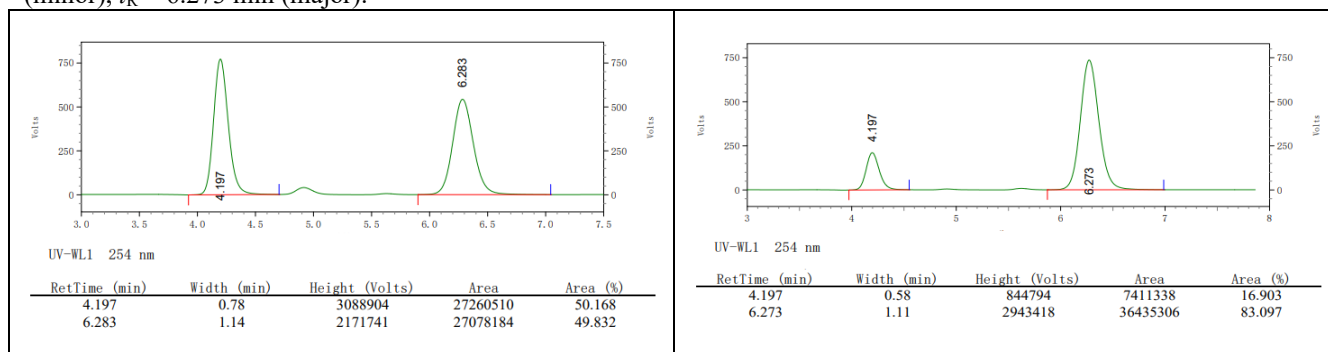

**(aS,S)-4-bromo-1-(tert-butyl)-5-(2-hydroxy-7-phenylnaphthalen-1-yl)-3,3-dimethyl-3H-1λ<sup>6</sup>-isothiazole 1-oxide (2g)**

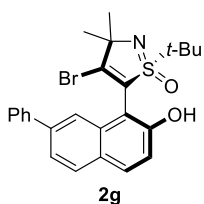

**Appearance:** white solid.

**Yield:** 37%, 53 mg. **ee** = 90%.

**<sup>1</sup>H NMR** (400 MHz, CDCl<sub>3</sub>) δ 9.04 (s, 1H), 7.92 – 7.85 (m, 2H), 7.80 – 7.70 (m, 1H), 7.67 (s, 1H), 7.63 (d, *J* = 8.1 Hz, 2H), 7.47 (t, *J* = 7.5 Hz, 2H), 7.38 (t, *J* = 7.3 Hz, 1H), 7.24 (d, *J* = 8.7 Hz, 1H), 1.73 (s, 3H), 1.63 (s, 3H), 1.35 (s, 9H).

**<sup>13</sup>C NMR** (100 MHz, CDCl<sub>3</sub>) δ 156.77, 154.73, 140.98, 139.78, 134.25, 132.62, 132.01, 130.67,

130.23, 129.56, 129.00, 128.21, 127.59, 127.02, 123.53, 123.37, 121.53, 120.14, 108.36, 63.14, 30.48, 29.05, 24.32.

**HRMS (ESI)** *m/z* Calcd for [C<sub>25</sub>H<sub>26</sub>BrNNaO<sub>2</sub>S, M + Na]<sup>+</sup>: 506.0760, Found: 506.0767.

**Optical Rotation:** [α]<sub>D</sub><sup>25</sup> = 150.9° (*c* = 1.0, DCM).

**HPLC analysis:** Chiralcel AD-H (Hexane/*i*-PrOH = 95:5, flow rate = 1.0 mL/min, wave length = 254 nm), *t*<sub>R</sub> = 8.560 min (major), *t*<sub>R</sub> = 13.413 min (minor).

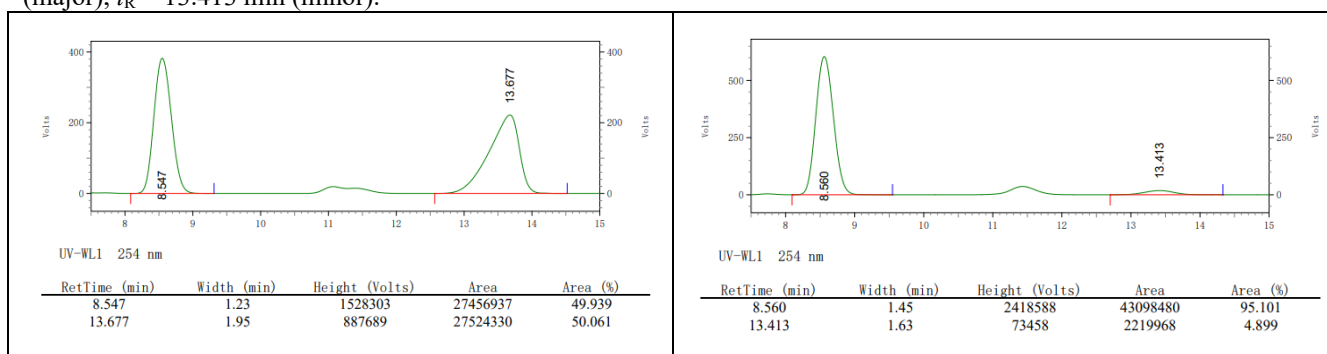

**(S)-N-(4-(7-bromo-2-hydroxynaphthalen-1-yl)-2-methylbut-3-yn-2-yl)-2-methylpropane-2-sulfinamide (1h)**

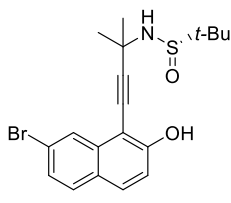

**1h**

**Appearance:** white solid.

**Yield:** 46%, 56 mg. **ee** = 86%.

**<sup>1</sup>H NMR** (400 MHz, CDCl<sub>3</sub>) δ 9.54 (s, 1H), 8.12 (s, 1H), 7.62 (d, *J* = 9.0 Hz, 1H), 7.56 (d, *J* = 8.6 Hz, 1H), 7.37 (dd, *J* = 8.6, 1.7 Hz, 1H), 7.14 (d, *J* = 8.9 Hz, 1H), 3.55 (s, 1H), 1.70 (s, 6H), 1.27 (s, 9H).

**<sup>13</sup>C NMR** (100 MHz, CDCl<sub>3</sub>) δ 159.61, 134.78, 130.02, 129.64, 126.63, 126.26, 121.35, 118.99,

103.52, 100.97, 78.13, 55.96, 50.06, 31.41, 29.76, 22.33.

**HRMS (ESI)** *m/z* Calcd for [C<sub>19</sub>H<sub>22</sub>BrNNaO<sub>2</sub>S, M + Na]<sup>+</sup>: 430.0447, Found: 430.0442.

**Optical Rotation:** [α]<sub>D</sub><sup>25</sup> = 67.1° (*c* = 1.0, DCM).

**HPLC analysis:** Chiralcel IA-H (Hexane/*i*-PrOH = 85:15, flow rate = 1.0 mL/min, wave length = 254 nm), *t*<sub>R</sub> = 3.880 min (minor), *t*<sub>R</sub> = 6.830 min (major).

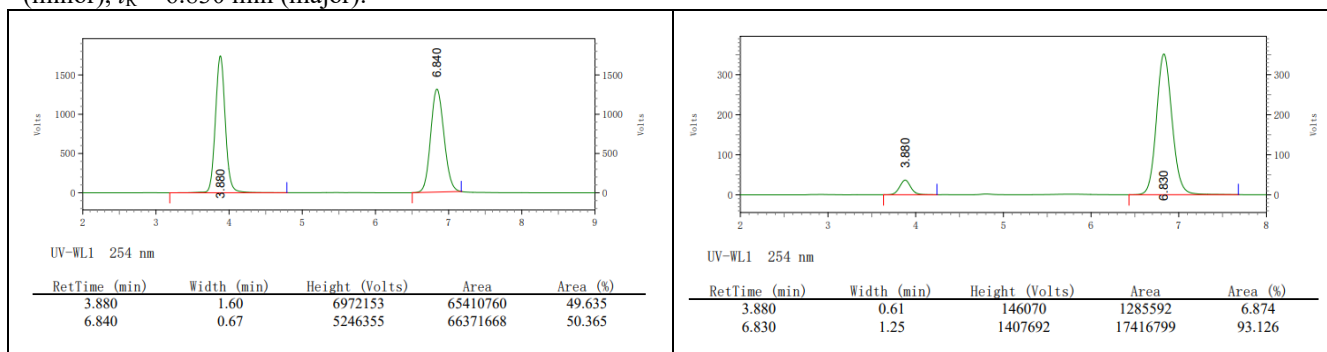



**(*aS,S*)-4-bromo-5-(7-bromo-2-hydroxynaphthalen-1-yl)-1-(tert-butyl)-3,3-dimethyl-3H-1 $\lambda$ 6-isothiazole 1-oxide (2h)**

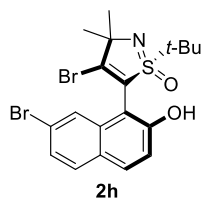

**Appearance:** white solid.

**Yield:** 43%, 62.5 mg. **ee** = 93%.

**<sup>1</sup>H NMR** (400 MHz, CDCl<sub>3</sub>)  $\delta$  9.10 (s, 1H), 7.80 (d, *J* = 8.9 Hz, 1H), 7.70 (d, *J* = 8.6 Hz, 1H), 7.58 (d, *J* = 1.9 Hz, 1H), 7.46 (dd, *J* = 8.5, 1.8 Hz, 1H), 7.25 (d, *J* = 9.0 Hz, 1H), 1.71 (s, 3H), 1.63 (s, 3H), 1.35 (s, 9H).

**<sup>13</sup>C NMR** (100 MHz, CDCl<sub>3</sub>)  $\delta$  157.41, 155.15, 132.12, 131.83, 130.58, 129.61, 127.42, 127.02, 125.87, 121.88, 120.66, 107.59, 63.23, 30.58, 28.99, 24.27.

**HRMS (ESI)** *m/z* Calcd for [C<sub>19</sub>H<sub>21</sub>Br<sub>2</sub>NNaO<sub>2</sub>S, M + Na]<sup>+</sup>: 507.9552, Found: 507.9550.

**Optical Rotation:** [ $\alpha$ ]<sub>D</sub><sup>25</sup> = 120.0° (*c* = 1.0, DCM).

**HPLC analysis:** Chiralcel IA-H (Hexane/*i*-PrOH = 98:2, flow rate = 1.0 mL/min, wave length = 254 nm), *t*<sub>R</sub> = 11.500 min (major), *t*<sub>R</sub> = 12.583 min (minor).

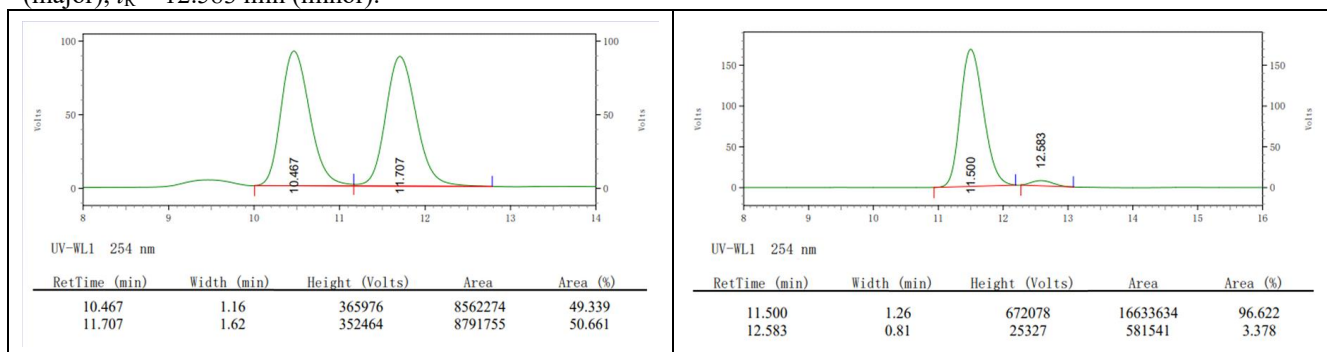

**(*S*)-*N*-(4-(6-hydroxyquinolin-5-yl)-2-methylbut-3-yn-2-yl)-2-methylpropane-2-sulfonamide (1i)**

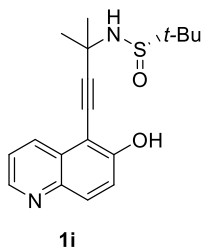

**Appearance:** white solid.

**Yield:** 43%, 42.6 mg. **ee** = 97%.

**<sup>1</sup>H NMR** (400 MHz, CDCl<sub>3</sub>)  $\delta$  9.62 (s, 1H), 8.73 (dd, *J* = 4.0, 1.6 Hz, 1H), 8.31 (d, *J* = 8.3 Hz, 1H), 7.94 (d, *J* = 9.2 Hz, 1H), 7.42 – 7.30 (m, 2H), 3.63 (s, 1H), 1.68 (d, *J* = 3.3 Hz, 6H), 1.28 (s, 9H).

**<sup>13</sup>C NMR** (100 MHz, CDCl<sub>3</sub>)  $\delta$  159.07, 147.48, 143.32, 132.71, 131.56, 128.66, 122.23, 121.49, 103.40, 101.30, 77.89, 56.02, 50.04, 31.36, 29.81, 22.35.

**HRMS (ESI)** *m/z* Calcd for [C<sub>18</sub>H<sub>22</sub>N<sub>2</sub>NaO<sub>2</sub>S, M + Na]<sup>+</sup>: 353.1294, Found: 353.1299.

**Optical Rotation:** [ $\alpha$ ]<sub>D</sub><sup>25</sup> = 45.8° (*c* = 1.0, DCM).

**HPLC analysis:** Chiralcel OD-H (Hexane/*i*-PrOH = 90:10, flow rate = 1.0 mL/min, wave length = 254 nm), *t*<sub>R</sub> = 5.663 min (minor), *t*<sub>R</sub> = 9.177 min (major).

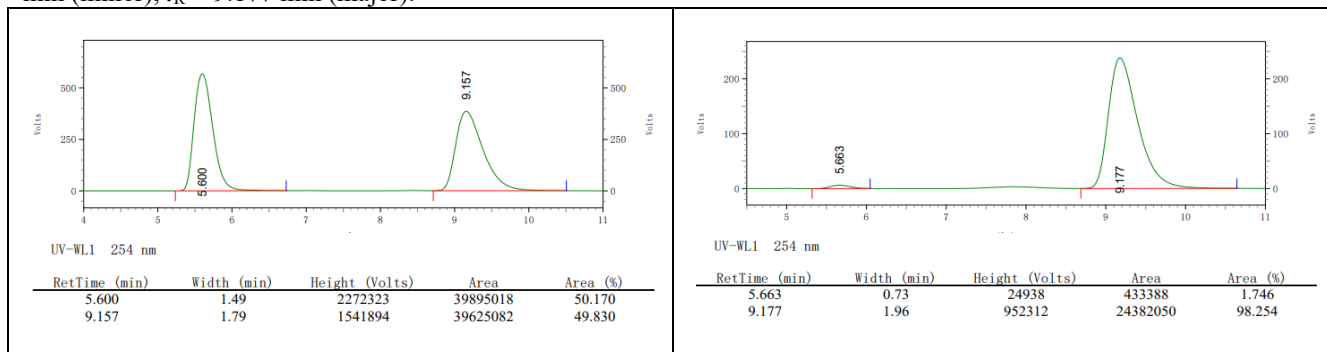

**(*aS,S*)-4-bromo-1-(*tert*-butyl)-5-(6-hydroxyquinolin-5-yl)-3,3-dimethyl-3H-1 $\lambda$ 6-isothiazole 1-oxide (2i)**

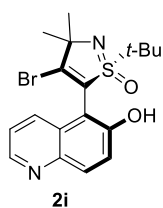

**Appearance:** white solid.

**Yield:** 47%, 57.5 mg. **ee** = 93%.

**<sup>1</sup>H NMR** (400 MHz, CDCl<sub>3</sub>) δ 9.20 (s, 1H), 8.83 (d, *J* = 3.0 Hz, 1H), 8.12 (d, *J* = 9.2 Hz, 1H), 7.76 (d, *J* = 8.4 Hz, 1H), 7.48 (d, *J* = 9.2 Hz, 1H), 7.43 (dd, *J* = 8.6, 4.2 Hz, 1H), 1.72 (s, 3H), 1.62 (s, 3H), 1.34 (s, 9H).

**<sup>13</sup>C NMR** (100 MHz, CDCl<sub>3</sub>) δ 157.27, 154.62, 147.83, 144.38, 133.64, 131.51, 129.22, 125.64, 123.92, 121.83, 107.77, 63.14, 30.58, 29.04, 24.26.

**HRMS (ESI)** *m/z* Calcd for [C<sub>18</sub>H<sub>21</sub>BrN<sub>2</sub>NaO<sub>2</sub>S, M + Na]<sup>+</sup>: 431.0399, Found: 431.0393.

**Optical Rotation:** [α]<sub>D</sub><sup>25</sup> = 190.9° (*c* = 1.0, DCM).

**HPLC analysis:** Chiralcel IA-H (Hexane/*i*-PrOH = 90:10, flow rate = 1.0 mL/min, wave length = 254 nm), *t*<sub>R</sub> = 8.887 min (minor), *t*<sub>R</sub> = 9.910 min (major).

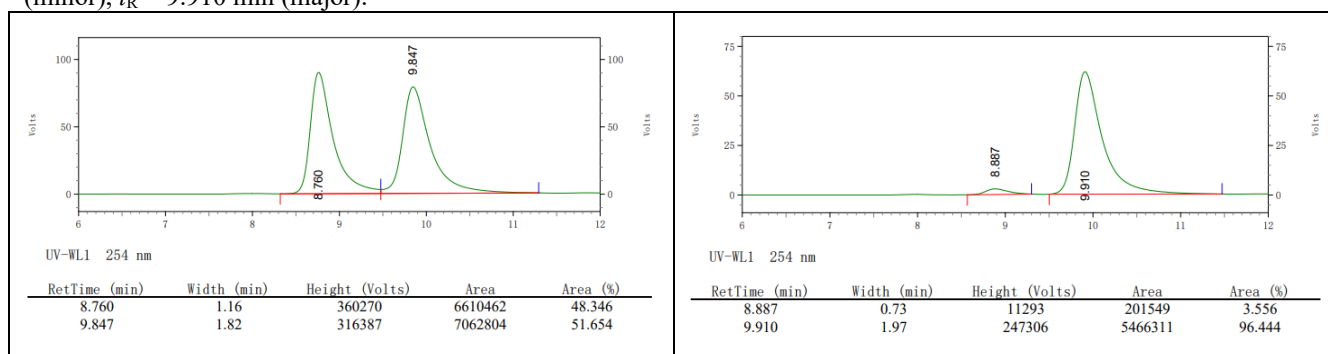

**(*S*)-*N*-(4-(2-hydroxynaphthalen-1-yl)-2-methylbut-3-yn-2-yl)propane-2-sulfonamide (1j)**

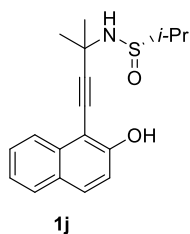

**Appearance:** white solid.

**Yield:** 49%, 46 mg. **ee** = 35%.

**<sup>1</sup>H NMR** (400 MHz, CDCl<sub>3</sub>) δ 9.19 (s, 1H), 8.00 (d, *J* = 8.3 Hz, 1H), 7.70 (dd, *J* = 16.9, 8.5 Hz, 2H), 7.47 (t, *J* = 7.5 Hz, 1H), 7.31 (t, *J* = 7.3 Hz, 1H), 7.14 (d, *J* = 8.9 Hz, 1H), 3.97 (s, 1H), 2.87 (p, *J* = 6.7, 5.9 Hz, 1H), 1.69 (d, *J* = 4.6 Hz, 6H), 1.30 (d, *J* = 6.8 Hz, 3H), 1.26 (d, *J* = 6.8 Hz, 3H).

**<sup>13</sup>C NMR** (100 MHz, CDCl<sub>3</sub>) δ 158.96, 133.57, 130.21, 128.06, 127.91, 126.79, 124.45, 123.34, 118.45, 103.28, 101.60, 78.71, 54.40, 50.06, 31.53, 29.91, 15.19, 15.11.

**HRMS (ESI)** *m/z* Calcd for [C<sub>18</sub>H<sub>21</sub>NNaO<sub>2</sub>S, M + Na]<sup>+</sup>: 338.1185, Found: 338.1181.

**Optical Rotation:** [α]<sub>D</sub><sup>25</sup> = 4.1° (*c* = 1.0, DCM).

**HPLC analysis:** Chiralcel OD-H (Hexane/*i*-PrOH = 85:15, flow rate = 1.0 mL/min, wave length = 254 nm), *t*<sub>R</sub> = 4.793 min (minor), *t*<sub>R</sub> = 6.703 min (major).

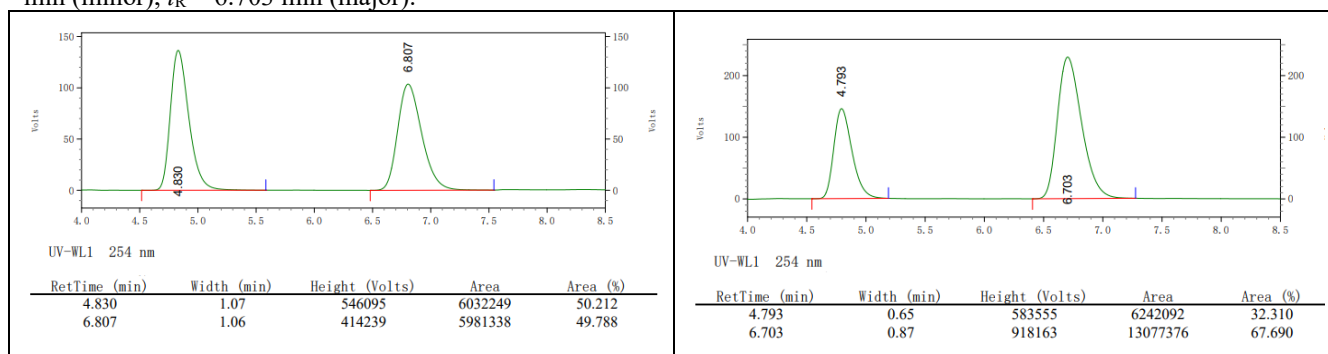

**(*aS,S*)-4-bromo-5-(2-hydroxynaphthalen-1-yl)-1-isopropyl-3,3-dimethyl-3H-1λ<sup>6</sup>-isothiazole 1-oxide (2j)**

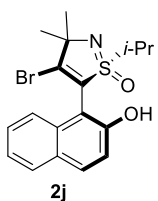

**Appearance:** white solid.

**Yield:** 39%, 46 mg. **ee** = 52%.

**<sup>1</sup>H NMR** (400 MHz, CDCl<sub>3</sub>) δ 8.79 (s, 1H), 7.85 (dd, *J* = 8.3, 4.4 Hz, 2H), 7.53 – 7.46 (m, 1H), 7.40 (dd, *J* = 14.5, 7.4 Hz, 2H), 7.29 – 7.24 (m, 1H), 3.42 (p, *J* = 6.9 Hz, 1H), 1.72 (s, 3H), 1.65 (s, 3H), 1.39 (d, *J* = 7.0 Hz, 3H), 1.22 (d, *J* = 6.8 Hz, 3H).

**<sup>13</sup>C NMR** (100 MHz, CDCl<sub>3</sub>) δ 156.79, 154.41, 132.40, 130.87, 130.21, 129.04, 127.35, 123.73, 123.04, 120.19, 106.88, 55.51, 30.54, 29.44, 16.97, 15.77, 14.15.

**HRMS (ESI)** *m/z* Calcd for [C<sub>18</sub>H<sub>20</sub>BrNNaO<sub>2</sub>S, M + Na]<sup>+</sup>: 416.0290, Found: 416.0290.

**Optical Rotation:** [α]<sub>D</sub><sup>25</sup> = 2.0° (*c* = 1.0, DCM).

**HPLC analysis:** Chiralcel IA-H (Hexane/*i*-PrOH = 90:10, flow rate = 1.0 mL/min, wave length = 254 nm), *t*<sub>R</sub> = 6.600 min (minor), *t*<sub>R</sub> = 8.993 min (major).

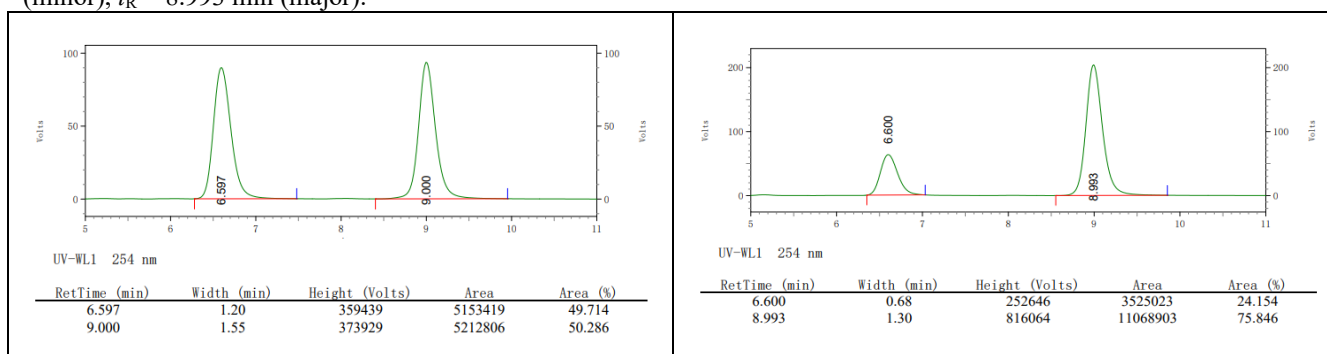

**(*S*)-*N*-(4-(2-hydroxynaphthalen-1-yl)-2-methylbut-3-yn-2-yl)benzenesulfonamide (1k)**

**Appearance:** white solid.

**Yield:** 48%, 50.3 mg. **ee** = 74%.

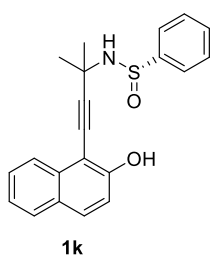

**<sup>1</sup>H NMR** (400 MHz, CDCl<sub>3</sub>) δ 8.97 (s, 1H), 8.02 (d, *J* = 8.3 Hz, 1H), 7.81 – 7.75 (m, 2H), 7.73 (d, *J* = 8.1 Hz, 1H), 7.70 (d, *J* = 8.9 Hz, 1H), 7.55 – 7.45 (m, 4H), 7.32 (t, *J* = 7.5 Hz, 1H), 7.18 (d, *J* = 8.9 Hz, 1H), 4.37 (s, 1H), 1.91 (s, 3H), 1.70 (s, 3H).

**<sup>13</sup>C NMR** (100 MHz, CDCl<sub>3</sub>) δ 158.95, 144.41, 133.56, 131.26, 130.31, 128.95, 128.09, 127.97, 126.85, 125.57, 124.47, 123.42, 118.25, 103.34, 101.65, 78.72, 50.48, 31.73, 29.73.

**HRMS (ESI)** *m/z* Calcd for [C<sub>21</sub>H<sub>19</sub>NNaO<sub>2</sub>S, M + Na]<sup>+</sup>: 372.1029, Found: 372.1026

**Optical Rotation:** [α]<sub>D</sub><sup>25</sup> = 118.2° (*c* = 1.0, DCM).

**HPLC analysis:** Chiralcel AD-H (Hexane/*i*-PrOH = 85:15, flow rate = 1.0 mL/min, wave length = 254 nm), *t*<sub>R</sub> = 7.000 min (minor), *t*<sub>R</sub> = 7.903 min (major).

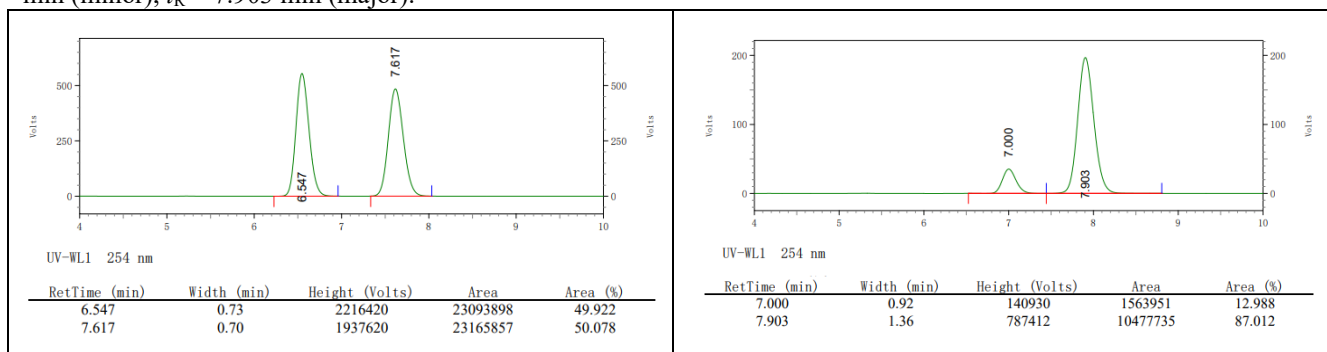

**(*aS*, *S*)-4-bromo-5-(2-hydroxynaphthalen-1-yl)-3,3-dimethyl-1-phenyl-3H-isothiazole 1-oxide (2k)**

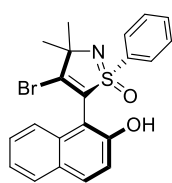

**2k**

**Appearance:** white solid.

**Yield:** 41%, 53 mg. **ee** = 92%.

**<sup>1</sup>H NMR** (400 MHz, DMSO-*d*<sub>6</sub>) δ 10.12 (s, 1H), 7.82 (d, *J* = 8.9 Hz, 1H), 7.68 (d, *J* = 8.2 Hz, 1H), 7.61 (d, *J* = 7.8 Hz, 2H), 7.53 (t, *J* = 7.5 Hz, 1H), 7.38 (t, *J* = 7.6 Hz, 2H), 7.25 (d, *J* = 8.9 Hz, 1H), 7.06 (t, *J* = 7.5 Hz, 1H), 6.82 (t, *J* = 7.6 Hz, 1H), 6.46 (d, *J* = 8.4 Hz, 1H), 1.72 (s, 3H), 1.67 (s, 3H).

**<sup>13</sup>C NMR** (100 MHz, DMSO-*d*<sub>6</sub>) δ 154.92, 153.37, 139.35, 134.35, 133.49, 132.06, 131.36, 129.51, 129.14, 127.95, 127.23, 126.04, 122.55, 121.98, 118.24, 105.95, 74.33, 30.77, 28.73.

**HRMS (ESI)** *m/z* Calcd for [C<sub>21</sub>H<sub>18</sub>BrNNaO<sub>2</sub>S, M + Na]<sup>+</sup>: 450.0134, Found: 450.0137.

**Optical Rotation:** [α]<sub>D</sub><sup>25</sup> = 179.0° (*c* = 1.0, DCM).

**HPLC analysis:** Chiralcel OD-H (Hexane/*i*-PrOH = 85:15, flow rate = 1.0 mL/min, wave length = 254 nm), *t*<sub>R</sub> = 5.510 min (minor), *t*<sub>R</sub> = 8.270 min (major).

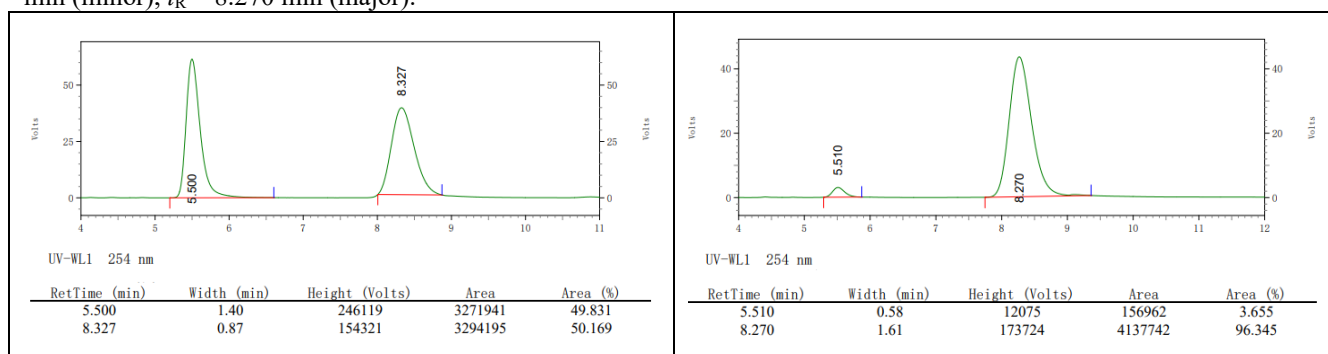

**(*S*)-*N*-(4-(2-hydroxynaphthalen-1-yl)-2-methylbut-3-yn-2-yl)-4-methylbenzenesulfonamide (1l)**

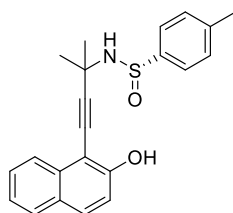

**1l**

**Appearance:** white solid.

**Yield:** 47%, 51 mg. **ee** = 62%.

**<sup>1</sup>H NMR** (400 MHz, CDCl<sub>3</sub>) δ 9.02 (s, 1H), 8.01 (d, *J* = 8.3 Hz, 1H), 7.71 (dd, *J* = 13.9, 8.5 Hz, 2H), 7.64 (d, *J* = 8.2 Hz, 2H), 7.48 (t, *J* = 7.6 Hz, 1H), 7.31 (t, *J* = 7.9 Hz, 3H), 7.18 (d, *J* = 9.0 Hz, 1H), 4.32 (s, 1H), 2.40 (s, 3H), 1.90 (s, 3H), 1.69 (s, 3H).

**<sup>13</sup>C NMR** (100 MHz, CDCl<sub>3</sub>) δ 158.99, 141.74, 141.34, 133.57, 130.25, 129.62, 128.08, 127.96, 126.82, 125.49, 124.48, 123.39, 118.29, 103.40, 101.69, 78.68, 50.36, 31.73, 29.74, 21.32.

**HRMS (ESI)** *m/z* Calcd for [C<sub>22</sub>H<sub>21</sub>NNaO<sub>2</sub>S, M + Na]<sup>+</sup>: 386.1185, Found: 386.1190.

**Optical Rotation:** [α]<sub>D</sub><sup>25</sup> = 85.9° (*c* = 1.0, DCM).

**HPLC analysis:** Chiralcel AD-H (Hexane/*i*-PrOH = 85:15, flow rate = 1.0 mL/min, wave length = 254 nm), *t*<sub>R</sub> = 9.657 min (minor), *t*<sub>R</sub> = 11.357 min (major).

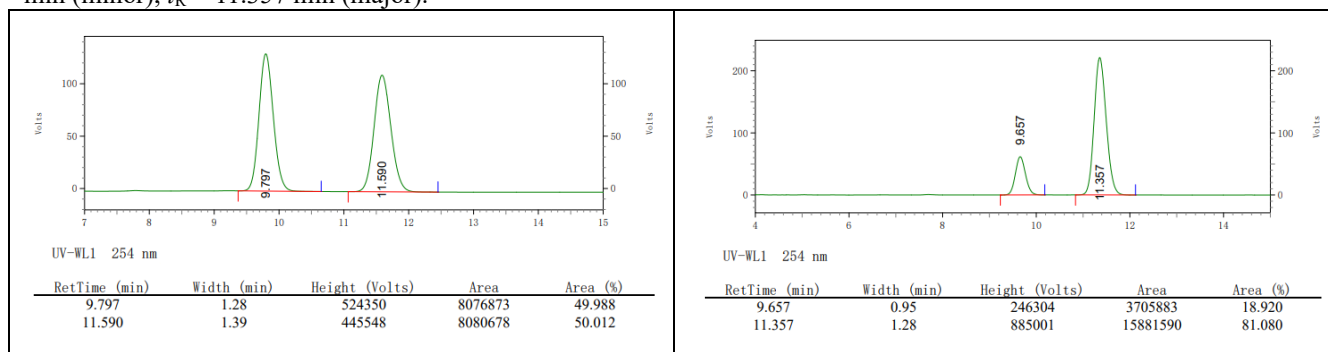

**(*aS,S*)-4-bromo-5-(2-hydroxynaphthalen-1-yl)-3,3-dimethyl-1-(*p*-tolyl)-3H-isothiazole 1-oxide (2l)**

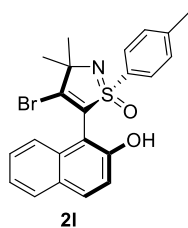

**Appearance:** white solid.

**Yield:** 38%, 50 mg. **ee** = 90%.

**<sup>1</sup>H NMR** (400 MHz, CDCl<sub>3</sub>) δ 8.42 (s, 1H), 7.73 (dd, *J* = 11.0, 8.5 Hz, 3H), 7.68 (dd, *J* = 6.3, 3.3 Hz, 1H), 7.25 (s, 1H), 7.24 – 7.19 (m, 2H), 7.12 (d, *J* = 8.0 Hz, 2H), 7.02 – 6.90 (m, 1H), 2.25 (s, 3H), 1.82 (s, 6H).

**<sup>13</sup>C NMR** (100 MHz, CDCl<sub>3</sub>) δ 154.54, 153.91, 145.42, 134.20, 133.74, 133.32, 132.04, 131.63, 130.04, 129.87, 128.67, 128.37, 127.02, 123.48, 122.40, 119.65, 106.80, 30.54, 29.46, 21.49.

**HRMS (ESI)** *m/z* Calcd for [C<sub>22</sub>H<sub>20</sub>BrNNaO<sub>2</sub>S, M + Na]<sup>+</sup>: 464.0290, Found: 464.0295.

**Optical Rotation:** [α]<sub>D</sub><sup>25</sup> = 70.8° (*c* = 1.0, DCM).

**HPLC analysis:** Chiralcel OD-H (Hexane/*i*-PrOH = 85:15, flow rate = 1.0 mL/min, wave length = 254 nm), *t*<sub>R</sub> = 5.577 min (minor), *t*<sub>R</sub> = 7.870 min (major).

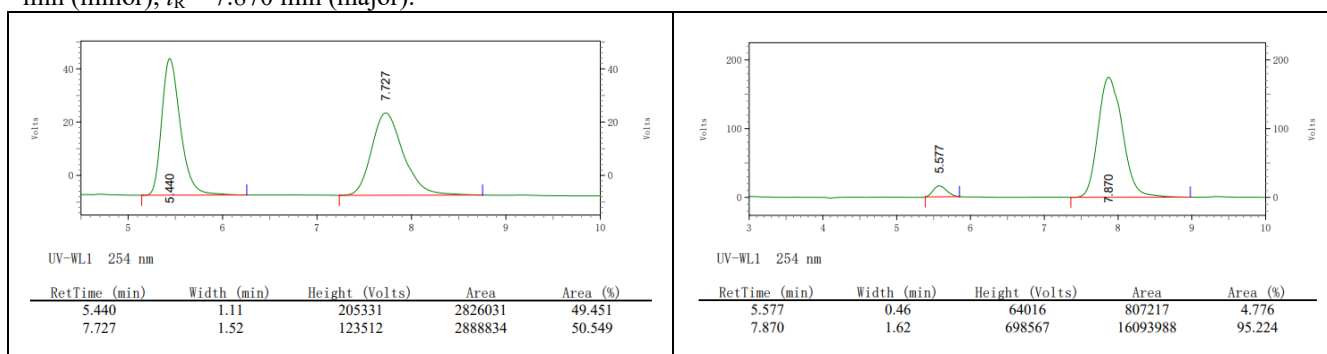

**(*S*)-4-(*tert*-butyl)-N-(4-(2-hydroxynaphthalen-1-yl)-2-methylbut-3-yn-2-yl)benzenesulfonamide (1m)**

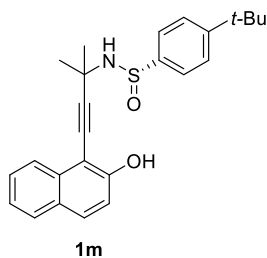

**Appearance:** white solid.

**Yield:** 47%, 57mg. **ee** = 70%.

**<sup>1</sup>H NMR** (400 MHz, CDCl<sub>3</sub>) δ 9.04 (s, 1H), 8.02 (d, *J* = 8.3 Hz, 1H), 7.78 – 7.65 (m, 4H), 7.54 (d, *J* = 8.5 Hz, 2H), 7.51 – 7.45 (m, 1H), 7.36 – 7.29 (m, 1H), 7.19 (d, *J* = 8.9 Hz, 1H), 4.31 (s, 1H), 1.91 (s, 3H), 1.70 (s, 3H), 1.35 (s, 9H).

**<sup>13</sup>C NMR** (100 MHz, CDCl<sub>3</sub>) δ 159.00, 158.99, 154.87, 141.24, 133.56, 130.26, 128.08, 127.96, 127.95, 126.82, 125.98, 125.34, 124.48, 123.39, 118.30, 118.29, 103.39, 101.67, 78.67, 50.35,

50.34, 34.94, 34.93, 31.72, 31.18, 31.17, 29.75.

**HRMS (ESI)** *m/z* Calcd for [C<sub>25</sub>H<sub>27</sub>NNaO<sub>2</sub>S, M + Na]<sup>+</sup>: 428.1655, Found: 428.1660.

**Optical Rotation:** [α]<sub>D</sub><sup>25</sup> = 30.1° (*c* = 1.0, DCM).

**HPLC analysis:** Chiralcel AD-H (Hexane/*i*-PrOH = 85:15, flow rate = 1.0 mL/min, wave length = 254 nm), *t*<sub>R</sub> = 7.810 min (minor), *t*<sub>R</sub> = 13.637 min (major).

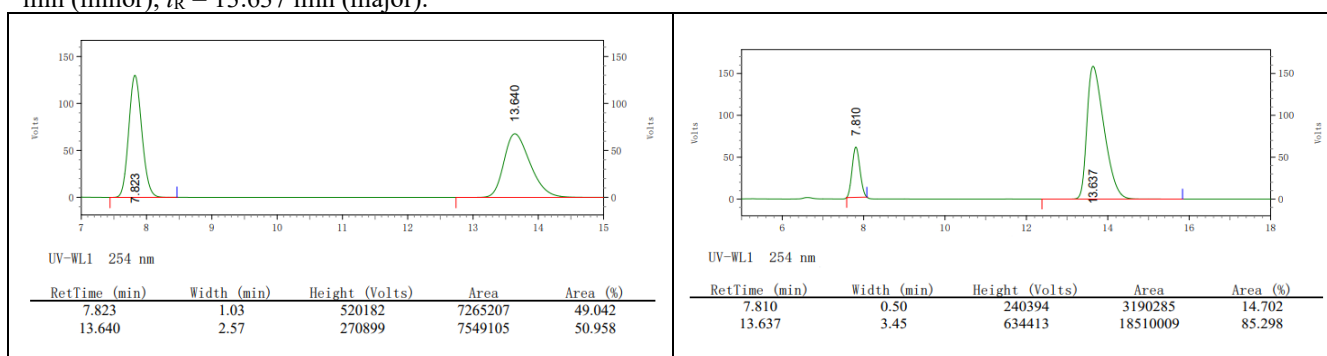

**(a*S,S*)-4-bromo-1-(4-(tert-butyl)phenyl)-5-(2-hydroxynaphthalen-1-yl)-3,3-dimethyl-3*H*-isothiazole 1-oxide (2*m*)**

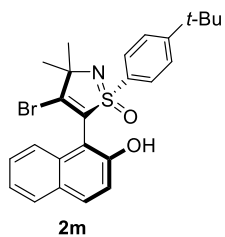

**Appearance:** white solid.

**Yield:** 39%, 56.5 mg. **ee** = 91%.

**<sup>1</sup>H NMR** (400 MHz, CDCl<sub>3</sub>) δ 8.29 (s, 1H), 7.90 – 7.83 (m, 1H), 7.75 (t, *J* = 10.6 Hz, 3H), 7.69 (d, *J* = 7.6 Hz, 1H), 7.34 (d, *J* = 8.2 Hz, 2H), 7.19 (dt, *J* = 15.4, 6.7 Hz, 2H), 6.90 (d, *J* = 8.0 Hz, 1H), 1.82 (s, 6H), 1.19 (s, 9H).

**<sup>13</sup>C NMR** (100 MHz, CDCl<sub>3</sub>) δ 167.95, 158.28, 154.65, 153.91, 134.26, 133.72, 133.41, 132.61, 132.02, 131.75, 129.84, 128.66, 128.29, 126.90, 126.23, 123.55, 123.47, 122.44, 119.64, 106.97, 35.12, 30.84, 30.61, 29.39.

**HRMS (ESI)** *m/z* Calcd for [C<sub>20</sub>H<sub>17</sub>NNaO<sub>2</sub>S, M + Na]<sup>+</sup>: 506.0760, Found: 506.0765.

**Optical Rotation:** [α]<sub>D</sub><sup>25</sup> = 105° (*c* = 1.0, DCM).

**HPLC analysis:** Chiralcel AD-H (Hexane/*i*-PrOH = 85:15, flow rate = 1.0 mL/min, wave length = 254 nm), *t*<sub>R</sub> = 5.460 min (minor), *t*<sub>R</sub> = 18.550 min (major).

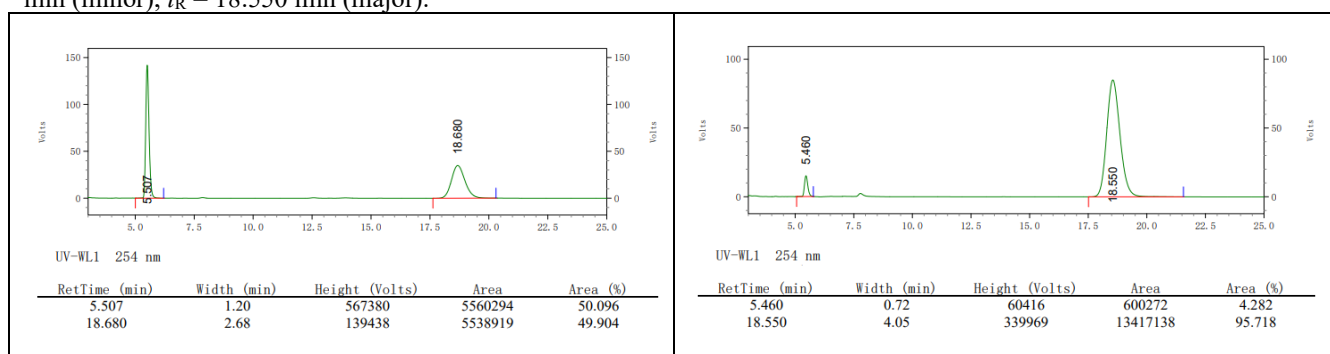

**(*S*)-4-chloro-N-(4-(2-hydroxynaphthalen-1-yl)-2-methylbut-3-yn-2-yl)benzenesulfonamide (1*n*)**

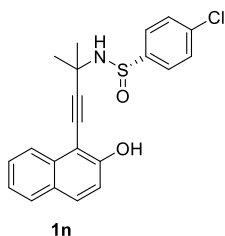

**Appearance:** white solid.

**Yield:** 42%, 55 mg. **ee** = 14%.

**<sup>1</sup>H NMR** (400 MHz, CDCl<sub>3</sub>) δ 8.80 (s, 1H), 8.00 (d, *J* = 8.3 Hz, 1H), 7.83 – 7.59 (m, 4H), 7.59 – 7.39 (m, 3H), 7.32 (t, *J* = 7.4 Hz, 1H), 7.16 (d, *J* = 8.9 Hz, 1H), 4.41 (s, 1H), 1.90 (s, 3H), 1.70 (s, 3H).

**<sup>13</sup>C NMR** (100 MHz, CDCl<sub>3</sub>) δ 158.83, 142.86, 137.72, 133.53, 130.41, 129.19, 128.13, 128.00, 127.13, 126.92, 124.44, 123.49, 118.16, 103.18, 101.57, 78.83, 50.61, 31.72, 29.75.

**HRMS (ESI)** *m/z* Calcd for [C<sub>21</sub>H<sub>18</sub>ClNNaO<sub>2</sub>S, M + Na]<sup>+</sup>: 406.0639, Found: 406.0643.

**Optical Rotation:** [α]<sub>D</sub><sup>25</sup> = 4.5° (*c* = 1.0, DCM).

**HPLC analysis:** Chiralcel IA-H (Hexane/*i*-PrOH = 85:15, flow rate = 1.0 mL/min, wave length = 254 nm), *t*<sub>R</sub> = 7.930 min (minor), *t*<sub>R</sub> = 12.527 min (major).

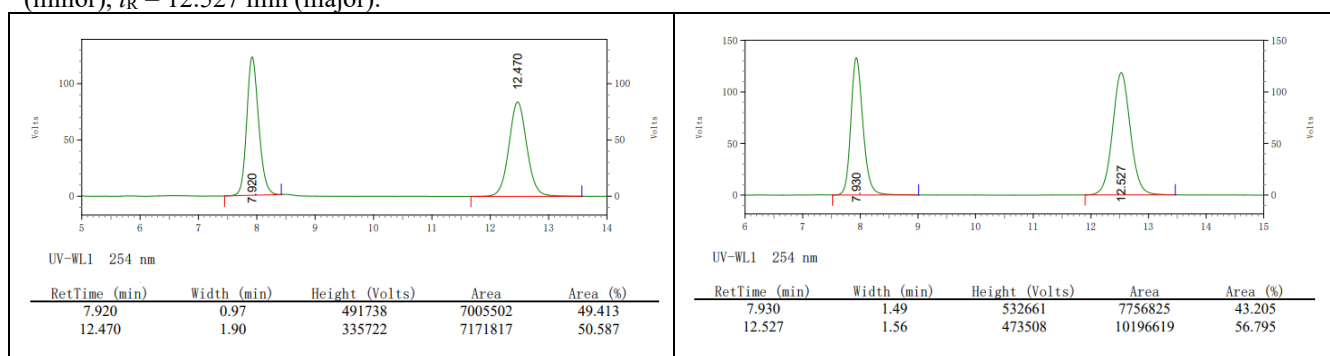

**(*aS,S*)-4-bromo-1-(4-chlorophenyl)-5-(2-hydroxynaphthalen-1-yl)-3,3-dimethyl-3H-isothiazole 1-oxide (2n)**

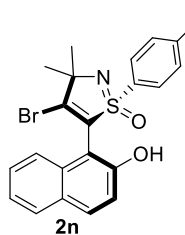

**Appearance:** white solid.

**Yield:** 20%, 28 mg. **ee** = 55%.

**<sup>1</sup>H NMR** (400 MHz, CDCl<sub>3</sub>) δ 8.19 (s, 1H), 7.77 (dd, *J* = 8.7, 6.8 Hz, 3H), 7.73 – 7.67 (m, 1H), 7.30 (d, *J* = 8.3 Hz, 2H), 7.28 – 7.18 (m, 3H), 6.93 – 6.86 (m, 1H), 1.82 (s, 6H).

**<sup>13</sup>C NMR** (100 MHz, CDCl<sub>3</sub>) δ 155.55, 153.96, 141.18, 135.22, 133.30, 132.33, 131.51, 131.29, 129.49, 128.73, 128.54, 127.26, 123.70, 122.04, 119.62, 106.35, 30.55, 29.43.

**HRMS (ESI)** *m/z* Calcd for [C<sub>21</sub>H<sub>17</sub>BrClNNaO<sub>2</sub>S, M + Na]<sup>+</sup>: 483.9744, Found: 483.9740.

**Optical Rotation:** [α]<sub>D</sub><sup>25</sup> = 9.8° (*c* = 1.0, DCM).

**HPLC analysis:** Chiralcel OD-H (Hexane/*i*-PrOH = 85:15, flow rate = 1.0 mL/min, wave length = 254 nm), *t*<sub>R</sub> = 4.873 min (minor), *t*<sub>R</sub> = 9.690 min (major).

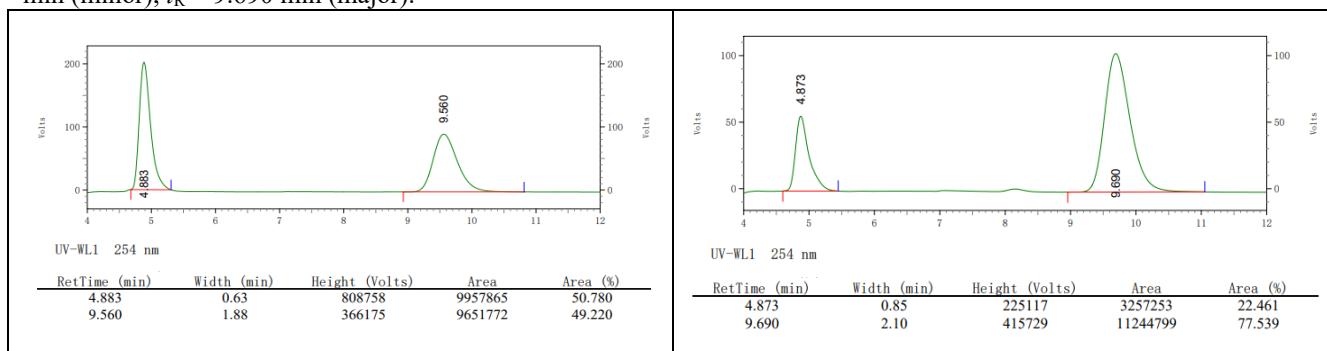

**(*S*)-4-fluoro-*N*-(4-(2-hydroxynaphthalen-1-yl)-2-methylbut-3-yn-2-yl)benzenesulfonamide (1o)**

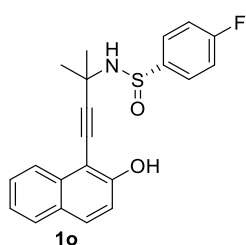

**Appearance:** white solid.

**Yield:** 52%, 57 mg. **ee** = 6%.

**<sup>1</sup>H NMR** (400 MHz, CDCl<sub>3</sub>) δ 8.86 (s, 1H), 8.01 (d, *J* = 8.3 Hz, 1H), 7.81 – 7.67 (m, 4H), 7.49 (t, *J* = 7.5 Hz, 1H), 7.32 (t, *J* = 7.4 Hz, 1H), 7.24 – 7.15 (m, 3H), 4.37 (s, 1H), 1.91 (s, 3H), 1.71 (s, 3H).

**<sup>13</sup>C NMR** (100 MHz, CDCl<sub>3</sub>) δ 164.55 (d, *J* = 250.5 Hz), 158.88, 139.88 (d, *J* = 2.8 Hz), 133.52, 130.40, 128.12, 128.00 (d, *J* = 8.6 Hz), 126.90, 124.44, 123.48, 118.20, 116.20 (d, *J* = 22.8 Hz),

103.18, 101.57, 78.80, 50.52, 31.75, 29.72.

**HRMS (ESI)** *m/z* Calcd for [C<sub>21</sub>H<sub>18</sub>FNNaO<sub>2</sub>S, M + Na]<sup>+</sup>: 390.0934, Found: 390.0930.

**Optical Rotation:** [α]<sub>D</sub><sup>25</sup> = 2.9° (*c* = 1.0, DCM).

**HPLC analysis:** Chiralcel OD-H (Hexane/*i*-PrOH = 80:20, flow rate = 1.0 mL/min, wave length = 254 nm), *t*<sub>R</sub> = 4.950 min (minor), *t*<sub>R</sub> = 11.370 min (major).

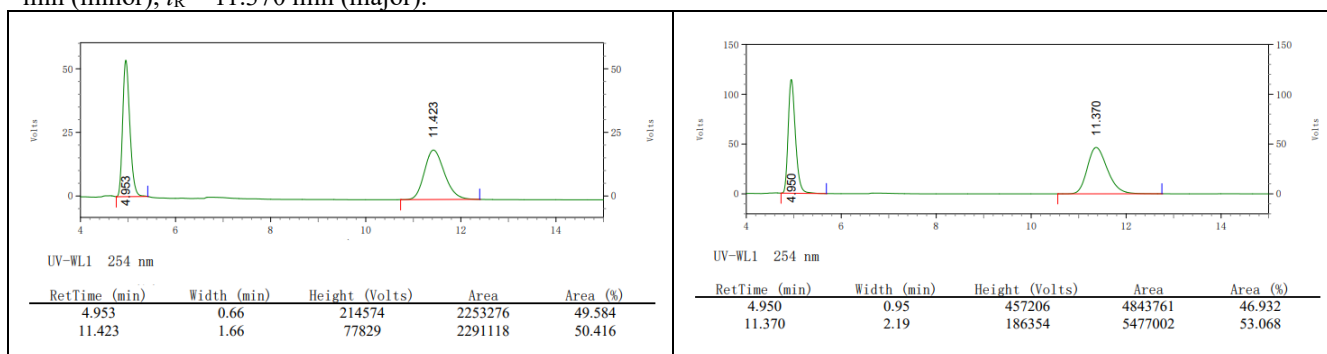

**(*aS,S*)-4-bromo-1-(4-fluorophenyl)-5-(2-hydroxynaphthalen-1-yl)-3,3-dimethyl-3H-isothiazole 1-oxide (2o)**

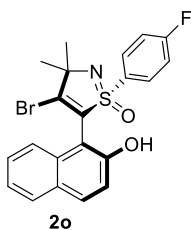

**2o**

**Appearance:** peak solid.

**Yield:** 32%, 43 mg. **ee** = 11%.

**<sup>1</sup>H NMR** (400 MHz, CDCl<sub>3</sub>) δ 8.19 (s, 1H), 7.85 (dd, *J* = 8.5, 5.0 Hz, 2H), 7.78 (d, *J* = 9.0 Hz, 1H), 7.70 (d, *J* = 7.5 Hz, 1H), 7.23 (dd, *J* = 12.0, 6.1 Hz, 3H), 7.01 (t, *J* = 8.4 Hz, 2H), 6.90 (d, *J* = 7.8 Hz, 1H), 1.82 (s, 6H).

**<sup>13</sup>C NMR** (100 MHz, CDCl<sub>3</sub>) δ 166.32 (d, *J* = 256.6 Hz), 155.32, 154.03, 133.53, 132.96 (d, *J* = 9.8 Hz), 132.55 (d, *J* = 2.3 Hz), 132.38, 131.63, 128.81, 128.62, 127.30, 123.78, 122.14, 119.72, 116.65 (d, *J* = 22.7 Hz), 106.54, 77.10, 30.65, 29.51.

**HRMS (ESI)** *m/z* Calcd for [C<sub>21</sub>H<sub>17</sub>BrFNNaO<sub>2</sub>S, M + Na]<sup>+</sup>: 468.0040, Found: 468.0048.

**Optical Rotation:** [α]<sub>D</sub><sup>25</sup> = 3.5° (*c* = 1.0, DCM).

**HPLC analysis:** Chiralcel OD-H (Hexane/*i*-PrOH = 80:20, flow rate = 1.0 mL/min, wave length = 254 nm), *t*<sub>R</sub> = 4.210 min (minor), *t*<sub>R</sub> = 6.493 min (major).

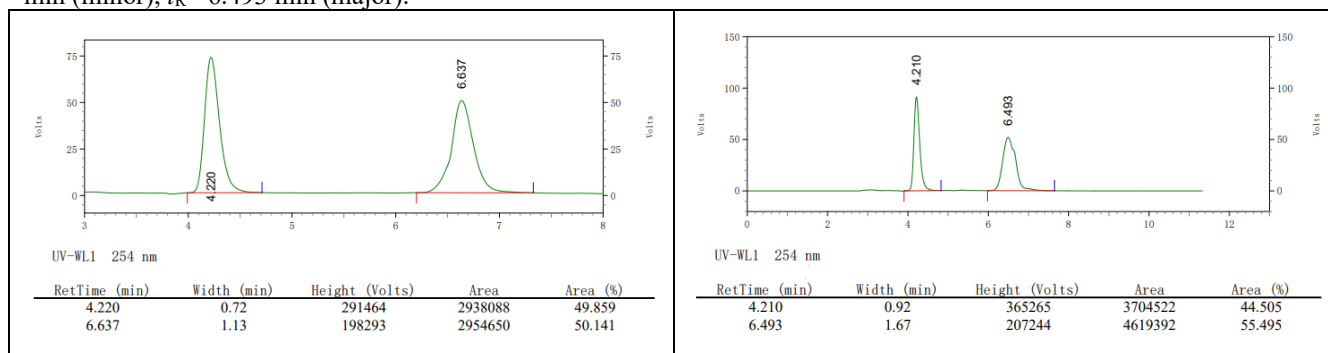

**(*S*)-*N*-(4-(6-bromo-2-hydroxynaphthalen-1-yl)-2-methylbut-3-yn-2-yl)benzenesulfonamide (1p)**

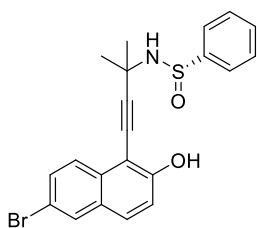

**1p**

**Appearance:** white solid.

**Yield:** 53%, 68 mg. **ee** = 64%.

**<sup>1</sup>H NMR** (400 MHz, CDCl<sub>3</sub>) δ 9.10 (s, 1H), 7.85 (d, *J* = 6.9 Hz, 2H), 7.75 (d, *J* = 4.9 Hz, 2H), 7.59 (d, *J* = 8.9 Hz, 1H), 7.56 – 7.43 (m, 4H), 7.18 (d, *J* = 8.9 Hz, 1H), 4.38 (s, 1H), 1.90 (s, 3H), 1.69 (s, 3H).

**<sup>13</sup>C NMR** (100 MHz, CDCl<sub>3</sub>) δ 159.12, 144.15, 132.04, 131.22, 129.91, 129.19, 128.99, 128.90, 126.31, 125.48, 119.40, 116.94, 103.73, 101.93, 78.15, 50.38, 31.52, 29.60.

**HRMS (ESI)** *m/z* Calcd for [C<sub>21</sub>H<sub>18</sub>BrNNaO<sub>2</sub>S, M + Na]<sup>+</sup>: 450.0134, Found: 450.0139.

**Optical Rotation:** [α]<sub>D</sub><sup>25</sup> = 30.4° (*c* = 1.0, DCM).

**HPLC analysis:** Chiralcel AD-H (Hexane/*i*-PrOH = 85:15, flow rate = 1.0 mL/min, wave length = 254 nm), *t*<sub>R</sub> = 6.837 min (minor), *t*<sub>R</sub> = 10.197 min (major).

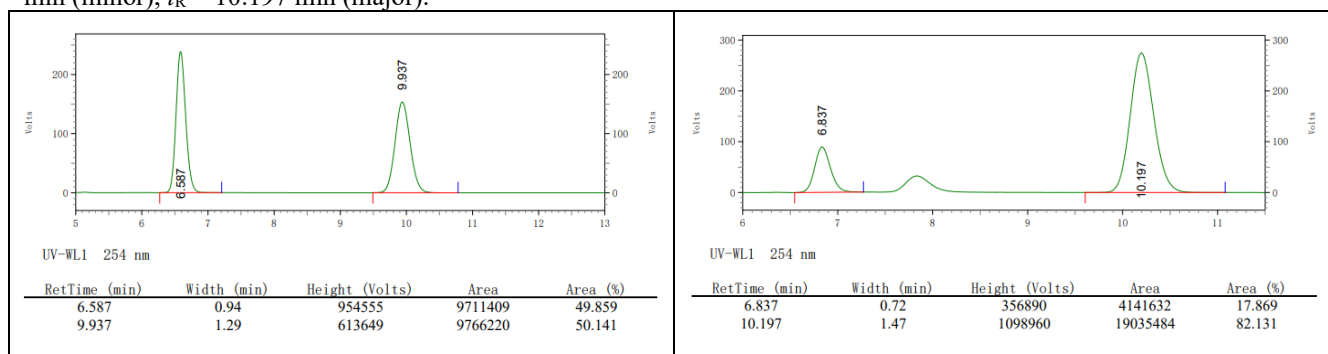



**(*aS,S*)-4-bromo-5-(6-bromo-2-hydroxynaphthalen-1-yl)-3,3-dimethyl-1-phenyl-3H-isothiazole 1-oxide (2p)**

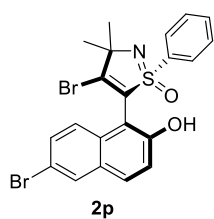

**Appearance:** white solid.

**Yield:** 39%, 59 mg. **ee** = 92%.

**<sup>1</sup>H NMR** (400 MHz, DMSO-*d*<sub>6</sub>) δ 10.35 (s, 1H), 7.97 (s, 1H), 7.83 (d, *J* = 8.8 Hz, 1H), 7.59 (t, *J* = 9.6 Hz, 3H), 7.42 (t, *J* = 7.0 Hz, 2H), 7.30 (d, *J* = 8.8 Hz, 1H), 6.93 (d, *J* = 8.7 Hz, 1H), 6.38 (d, *J* = 8.8 Hz, 1H), 1.68 (d, *J* = 21.4 Hz, 6H).

**<sup>13</sup>C NMR** (100 MHz, DMSO-*d*<sub>6</sub>) δ 155.44, 153.75, 139.12, 133.86, 133.62, 130.73, 130.66, 129.81, 129.50, 129.29, 128.80, 128.47, 124.19, 119.50, 115.28, 106.20, 74.48, 39.52, 30.74, 28.67.

**HRMS (ESI)** *m/z* Calcd for [C<sub>21</sub>H<sub>17</sub>Br<sub>2</sub>NNaO<sub>2</sub>S, M + Na]<sup>+</sup>: 527.9239, Found: 527.9235.

**Optical Rotation:** [α]<sub>D</sub><sup>25</sup> = 40.6° (*c* = 1.0, DCM).

**HPLC analysis:** Chiralcel OD-H (Hexane/*i*-PrOH = 85:15, flow rate = 1.0 mL/min, wave length = 254 nm), *t*<sub>R</sub> = 5.123 min (minor), *t*<sub>R</sub> = 7.557 min (major).

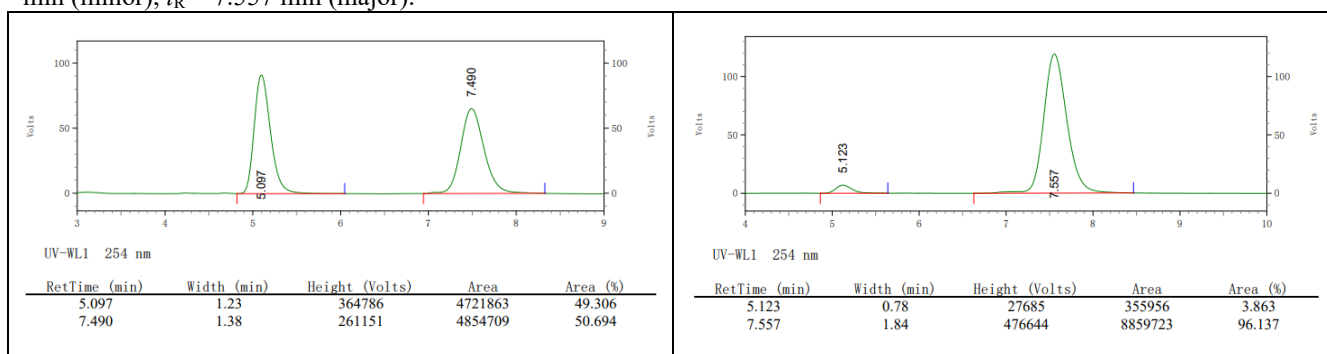

**(*S*)-*N*-(4-(6-bromo-2-hydroxynaphthalen-1-yl)-2-methylbut-3-yn-2-yl)-4-methylbenzenesulfinamide (1q)**

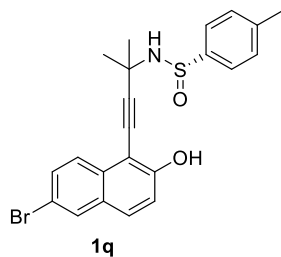

**Appearance:** white solid.

**Yield:** 47 %, 62 mg. **ee** = 65%.

**<sup>1</sup>H NMR** (400 MHz, CDCl<sub>3</sub>) δ 9.17 (s, 1H), 7.86 (d, *J* = 7.9 Hz, 2H), 7.63 (d, *J* = 7.4 Hz, 2H), 7.59 (d, *J* = 9.0 Hz, 1H), 7.52 (d, *J* = 8.8 Hz, 1H), 7.30 (d, *J* = 7.6 Hz, 2H), 7.18 (d, *J* = 8.8 Hz, 1H), 4.35 (s, 1H), 2.39 (s, 3H), 1.89 (s, 3H), 1.68 (s, 3H).

**<sup>13</sup>C NMR** (100 MHz, CDCl<sub>3</sub>) δ 159.25, 141.81, 141.16, 132.12, 129.96, 129.65, 129.20, 129.06, 126.36, 125.47, 119.48, 116.96, 103.77, 101.96, 78.19, 50.31, 31.63, 29.64, 21.33.

**HRMS (ESI)** *m/z* Calcd for [C<sub>22</sub>H<sub>20</sub>BrNNaO<sub>2</sub>S, M + Na]<sup>+</sup>: 464.0290, Found: 464.0297.

**Optical Rotation:** [α]<sub>D</sub><sup>25</sup> = 69.5° (*c* = 1.0, DCM).

**HPLC analysis:** Chiralcel IA-H (Hexane/*i*-PrOH = 90:10, flow rate = 1.0 mL/min, wave length = 254 nm), *t*<sub>R</sub> = 12.043 min (minor), *t*<sub>R</sub> = 17.410 min (major).

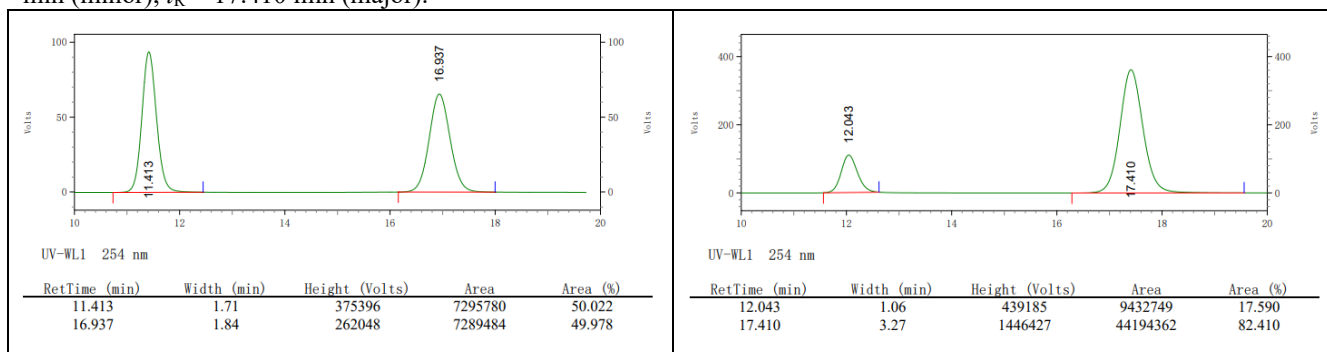

**(*aS,S*)-4-bromo-5-(6-bromo-2-hydroxynaphthalen-1-yl)-3,3-dimethyl-1-(*p*-tolyl)-3H-isothiazole 1-oxide (2q)**

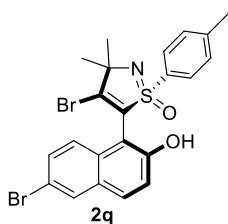

**Appearance:** white solid.

**Yield:** 40%, 62 mg. **ee** = 95%.

**<sup>1</sup>H NMR** (400 MHz, CDCl<sub>3</sub>) δ 8.51 (s, 1H), 7.82 (s, 1H), 7.71 (d, *J* = 8.0 Hz, 2H), 7.65 (d, *J* = 8.9 Hz, 1H), 7.30 – 7.23 (m, 2H), 7.15 (d, *J* = 7.9 Hz, 2H), 6.81 (d, *J* = 8.9 Hz, 1H), 2.29 (s, 3H), 1.81 (s, 6H).

**<sup>13</sup>C NMR** (100 MHz, CDCl<sub>3</sub>) δ 154.84, 154.23, 145.66, 133.36, 133.16, 131.03, 130.36, 130.26, 130.20, 129.98, 129.81, 124.13, 120.90, 117.17, 107.07, 77.32, 76.68, 30.51, 29.42, 21.55.

**HRMS (ESI)** *m/z* Calcd for [C<sub>22</sub>H<sub>19</sub>Br<sub>2</sub>NNaO<sub>2</sub>S, M + Na]<sup>+</sup>: 541.9395, Found: 541.9398.

**Optical Rotation:** [α]<sub>D</sub><sup>25</sup> = 120.3° (*c* = 1.0, DCM).

**HPLC analysis:** Chiralcel OD-H (Hexane/*i*-PrOH = 85:15, flow rate = 1.0 mL/min, wave length = 254 nm), *t*<sub>R</sub> = 5.627 min (minor), *t*<sub>R</sub> = 7.717 min (major).

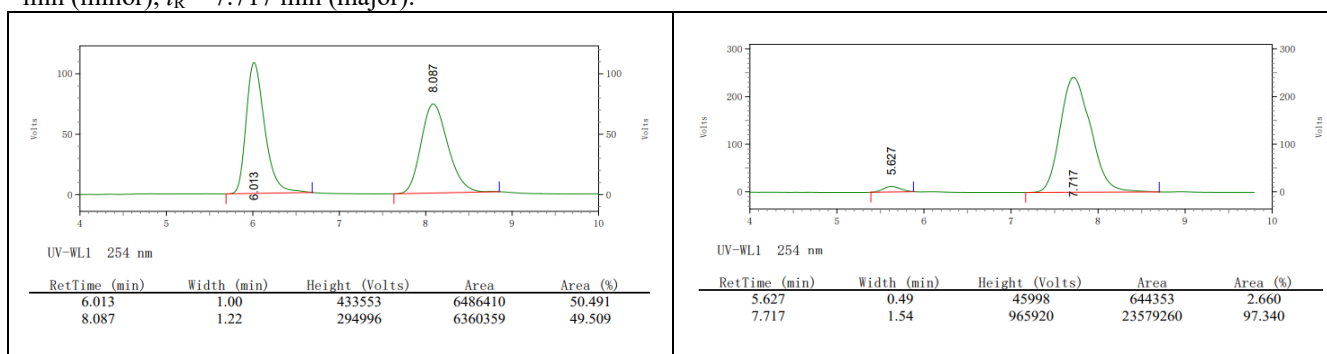

**(*S*)-*N*-(4-(2-hydroxy-7-methoxynaphthalen-1-yl)-2-methylbut-3-yn-2-yl)-4-methylbenzenesulfonamide (1r)**

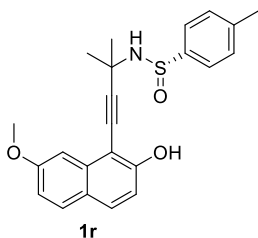

**Appearance:** white solid.

**Yield:** 45%, 52.5 mg. **ee** = 64%.

**<sup>1</sup>H NMR** (400 MHz, CDCl<sub>3</sub>) δ 8.90 (s, 1H), 7.61 (s, 4H), 7.30 (d, *J* = 28.0 Hz, 3H), 7.13 – 6.86 (m, 2H), 4.39 (s, 1H), 3.92 (s, 3H), 2.36 (s, 3H), 1.89 (s, 3H), 1.68 (s, 3H).

**<sup>13</sup>C NMR** (100 MHz, CDCl<sub>3</sub>) δ 159.40, 158.72, 141.65, 141.32, 135.06, 130.01, 129.56, 125.44, 123.25, 115.63, 115.00, 104.05, 103.53, 100.92, 78.72, 55.09, 50.34, 31.79, 29.81, 21.26.

**HRMS (ESI)** *m/z* Calcd for [C<sub>23</sub>H<sub>23</sub>NNaO<sub>3</sub>S, M + Na]<sup>+</sup>: 416.1291, Found: 416.1295.

**Optical Rotation:** [α]<sub>D</sub><sup>25</sup> = 80.2° (*c* = 1.0, DCM).

**HPLC analysis:** Chiralcel AD-H (Hexane/*i*-PrOH = 85:15, flow rate = 1.0 mL/min, wave length = 254 nm), *t*<sub>R</sub> = 12.237 min (minor), *t*<sub>R</sub> = 13.193 min (major).

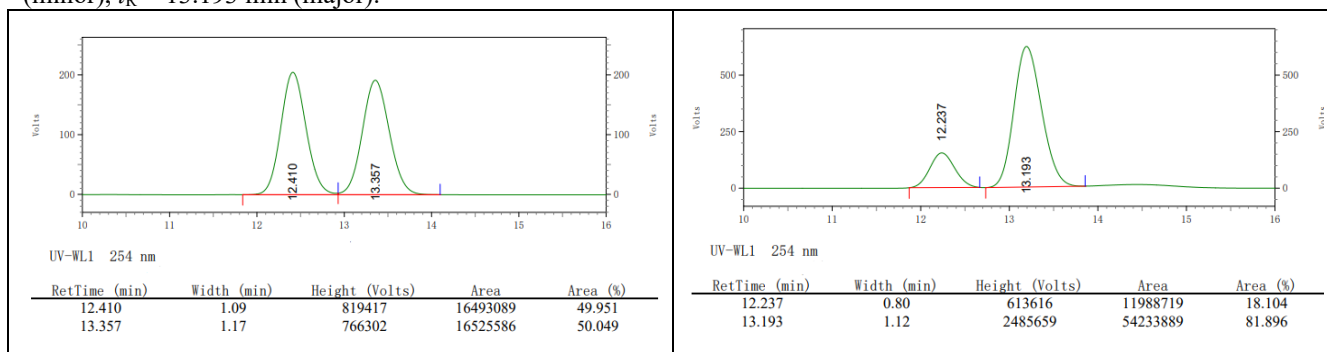

**(a*S,S*)-4-bromo-5-(2-hydroxy-7-methoxynaphthalen-1-yl)-3,3-dimethyl-1-(*p*-tolyl)-3*H*-isothiazole 1-oxide (2r)**

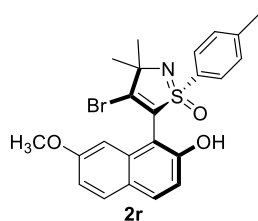

**Appearance:** white solid.

**Yield:** 38%, 53.6 mg. **ee** = 93%.

**<sup>1</sup>H NMR** (400 MHz, CDCl<sub>3</sub>) δ 8.28 (s, 1H), 7.73 (d, *J* = 8.2 Hz, 2H), 7.66 (d, *J* = 8.9 Hz, 1H), 7.55 (d, *J* = 8.9 Hz, 1H), 7.13 (d, *J* = 8.1 Hz, 2H), 7.09 (d, *J* = 8.9 Hz, 1H), 6.85 (dd, *J* = 8.8, 2.2 Hz, 1H), 6.30 – 6.23 (m, 1H), 3.63 (s, 3H), 2.27 (s, 3H), 1.81 (d, *J* = 6.1 Hz, 6H).

**<sup>13</sup>C NMR** (100 MHz, CDCl<sub>3</sub>) δ 158.60, 154.47, 154.38, 145.48, 134.00, 133.66, 133.15, 131.74,

129.94, 129.85, 129.79, 123.88, 116.90, 115.80, 105.98, 101.39, 54.72, 30.35, 29.50, 21.49.

**HRMS (ESI)** *m/z* Calcd for [C<sub>23</sub>H<sub>22</sub>BrNNaO<sub>3</sub>S, M + Na]<sup>+</sup>: 494.0396, Found: 494.0390.

**Optical Rotation:** [α]<sub>D</sub><sup>25</sup> = 44.0° (*c* = 1.0, DCM).

**HPLC analysis:** Chiralcel OD-H (Hexane/*i*-PrOH = 85:15, flow rate = 1.0 mL/min, wave length = 254 nm), *t*<sub>R</sub> = 6.137 min (minor), *t*<sub>R</sub> = 8.073 min (major).

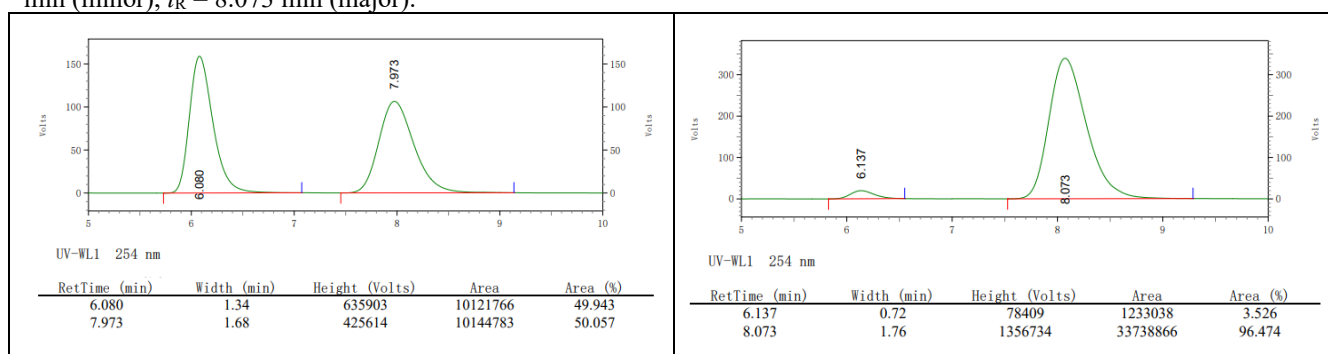

**(*S*)-*N*-(4-(6-hydroxyquinolin-5-yl)-2-methylbut-3-yn-2-yl)benzenesulfinamide (1s)**

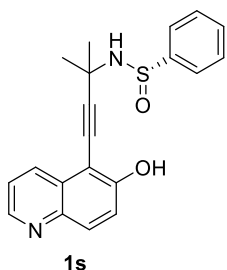

**Appearance:** white solid.

**Yield:** 45%, 47 mg. **ee** = 77%.

**<sup>1</sup>H NMR** (400 MHz, CDCl<sub>3</sub>) δ 9.25 (s, 1H), 8.74 (d, *J* = 4.2 Hz, 1H), 8.31 (d, *J* = 8.4 Hz, 1H), 7.96 (d, *J* = 9.3 Hz, 1H), 7.77 (dd, *J* = 6.5, 3.0 Hz, 2H), 7.56 – 7.48 (m, 3H), 7.42 – 7.35 (m, 2H), 4.41 (s, 1H), 1.92 (s, 3H), 1.70 (s, 3H).

**<sup>13</sup>C NMR** (100 MHz, CDCl<sub>3</sub>) δ 159.14, 147.60, 144.17, 143.40, 132.72, 131.71, 131.31, 128.96, 125.54, 122.00, 121.57, 103.60, 101.37, 77.83, 50.40, 31.56, 29.64.

**HRMS (ESI)** *m/z* Calcd for [C<sub>20</sub>H<sub>18</sub>N<sub>2</sub>NaO<sub>2</sub>S, M + Na]<sup>+</sup>: 373.0981, Found: 373.0977.

**Optical Rotation:** [α]<sub>D</sub><sup>25</sup> = 43.4° (*c* = 1.0, DCM).

**HPLC analysis:** Chiralcel AD-H (Hexane/*i*-PrOH = 85:15, flow rate = 1.0 mL/min, wave length = 254 nm), *t*<sub>R</sub> = 8.047 min (major), *t*<sub>R</sub> = 9.750 min (minor).

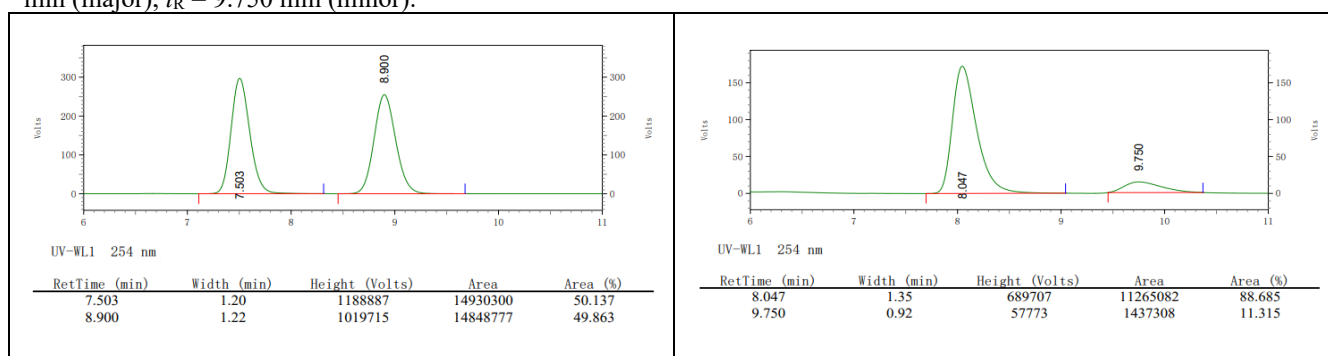

**(*aS,S*)-4-bromo-5-(6-hydroxyquinolin-5-yl)-3,3-dimethyl-1-phenyl-3H-isothiazole 1-oxide (2s)**

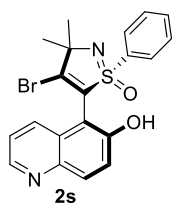

**Appearance:** white solid.

**Yield:** 46%, 59 mg. **ee** = 88%.

**<sup>1</sup>H NMR** (400 MHz, CDCl<sub>3</sub>) δ 8.66 (d, *J* = 4.3 Hz, 1H), 8.54 (s, 1H), 8.04 (d, *J* = 9.2 Hz, 1H), 7.84 (d, *J* = 7.7 Hz, 2H), 7.49 (dd, *J* = 8.6, 5.7 Hz, 2H), 7.38 (t, *J* = 7.7 Hz, 2H), 7.22 (d, *J* = 8.3 Hz, 1H), 7.12 (dd, *J* = 8.5, 4.2 Hz, 1H), 1.83 (s, 6H).

**<sup>13</sup>C NMR** (100 MHz, CDCl<sub>3</sub>) δ 155.58, 154.33, 147.77, 143.98, 136.39, 134.39, 133.45, 132.78, 130.50, 129.87, 129.34, 126.73, 123.51, 121.70, 106.32, 30.57, 29.50.

**HRMS (ESI)** *m/z* Calcd for [C<sub>20</sub>H<sub>17</sub>BrN<sub>2</sub>NaO<sub>2</sub>S, M + Na]<sup>+</sup>: 451.0086, Found: 451.0080.

**Optical Rotation:** [α]<sub>D</sub><sup>25</sup> = 66.3° (*c* = 1.0, DCM).

**HPLC analysis:** Chiralcel OD-H (Hexane/*i*-PrOH = 85:15, flow rate = 1.0 mL/min, wave length = 254 nm), *t*<sub>R</sub> = 5.717 min (minor), *t*<sub>R</sub> = 9.113 min (major).

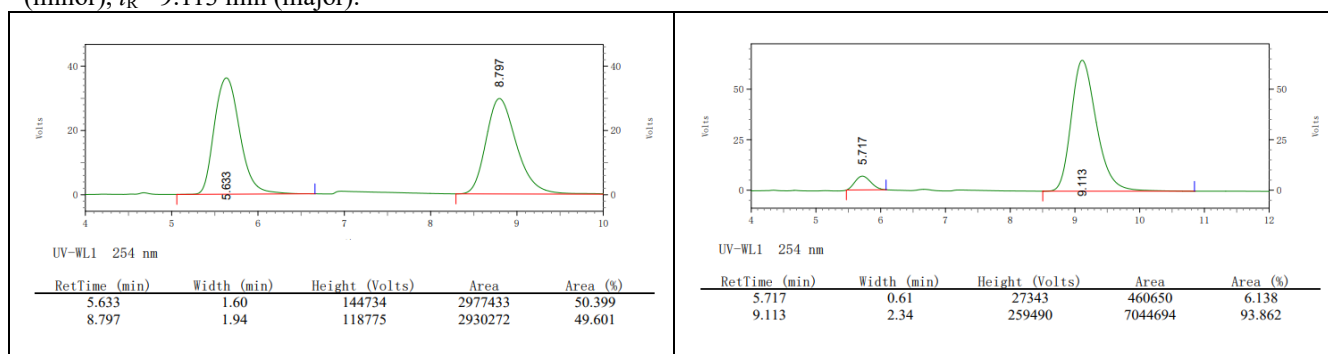

**(*S*)-*N*-(4-(6-bromo-2-hydroxynaphthalen-1-yl)-2-methylbut-3-yn-2-yl)-4-(*tert*-butyl)benzenesulfonamide (1t)**

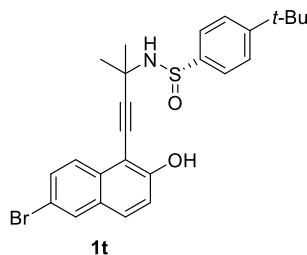

**Appearance:** white solid.

**Yield:** 55%, 80 mg. **ee** = 74%.

**<sup>1</sup>H NMR** (400 MHz, CDCl<sub>3</sub>) δ 9.20 (s, 1H), 7.91 – 7.84 (m, 2H), 7.68 (d, *J* = 8.4 Hz, 2H), 7.60 (d, *J* = 9.0 Hz, 1H), 7.56 – 7.49 (m, 3H), 7.19 (d, *J* = 9.0 Hz, 1H), 4.32 (s, 1H), 1.90 (s, 3H), 1.68 (s, 3H), 1.34 (s, 9H).

**<sup>13</sup>C NMR** (100 MHz, CDCl<sub>3</sub>) δ 159.27, 154.97, 141.05, 132.11, 129.97, 129.22, 129.05, 126.37, 126.02, 125.32, 119.50, 116.96, 103.75, 101.94, 78.21, 50.30, 34.96, 31.65, 31.18,

29.64.

**HRMS (ESI)** *m/z* Calcd for [C<sub>25</sub>H<sub>26</sub>BrNNaO<sub>2</sub>S, M + Na]<sup>+</sup>: 506.0760, Found: 506.0766.

**Optical Rotation:** [α]<sub>D</sub><sup>25</sup> = 45.4° (*c* = 1.0, DCM).

**HPLC analysis:** Chiralcel IA-H (Hexane/*i*-PrOH = 85:15, flow rate = 1.0 mL/min, wave length = 254 nm), *t*<sub>R</sub> = 6.713 min (minor), *t*<sub>R</sub> = 11.660 min (major).

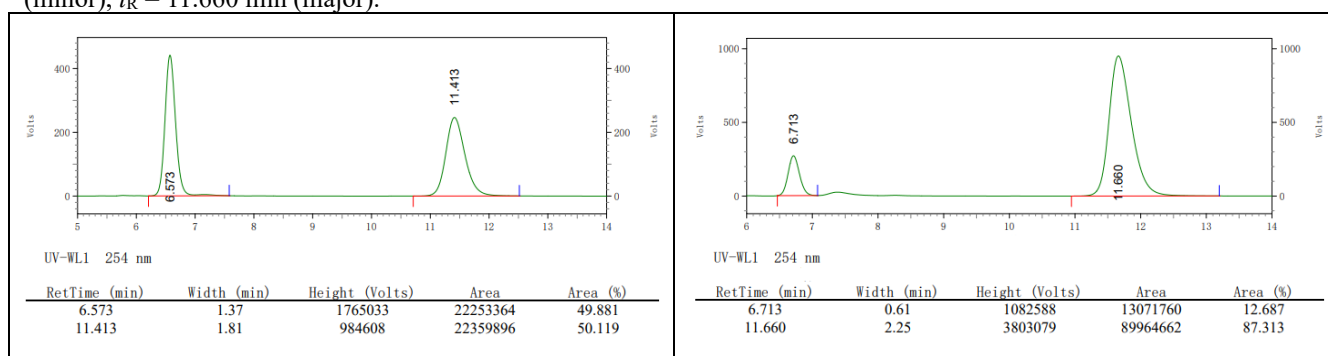

**(*aS,S*)-4-bromo-5-(6-bromo-2-hydroxynaphthalen-1-yl)-1-(4-(*tert*-butyl)phenyl)-3,3-dimethyl-3H-isothiazole 1-oxide (2t)**

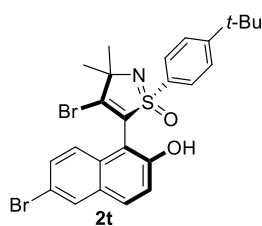

**Appearance:** white solid.

**Yield:** 40%, 67.3 mg. **ee** = 97%.

**<sup>1</sup>H NMR** (400 MHz, CDCl<sub>3</sub>) δ 8.39 (s, 1H), 7.83 (d, *J* = 2.0 Hz, 1H), 7.71 (d, *J* = 8.3 Hz, 2H), 7.67 (d, *J* = 8.9 Hz, 1H), 7.36 (d, *J* = 8.3 Hz, 2H), 7.31 – 7.25 (m, 1H), 7.21 (dd, *J* = 9.1, 1.9 Hz, 1H), 6.72 (d, *J* = 8.9 Hz, 1H), 1.81 (d, *J* = 2.9 Hz, 6H), 1.21 (s, 9H).

**<sup>13</sup>C NMR** (100 MHz, CDCl<sub>3</sub>) δ 158.52, 154.26, 133.32, 133.28, 130.99, 130.26, 130.07, 129.78, 129.75, 126.33, 124.15, 120.83, 117.08, 107.15, 35.16, 30.86, 30.58, 29.32.

**HRMS (ESI)** *m/z* Calcd for [C<sub>25</sub>H<sub>25</sub>Br<sub>2</sub>NNaO<sub>2</sub>S, M + Na]<sup>+</sup>: 583.9865, Found: 583.9860.

**Optical Rotation:** [α]<sub>D</sub><sup>25</sup> = 130.2° (*c* = 1.0, DCM).

**HPLC analysis:** Chiralcel OD-H (Hexane/*i*-PrOH = 85:15, flow rate = 1.0 mL/min, wave length = 254 nm), *t<sub>R</sub>* = 4.770 min (minor), *t<sub>R</sub>* = 5.337 min (major).

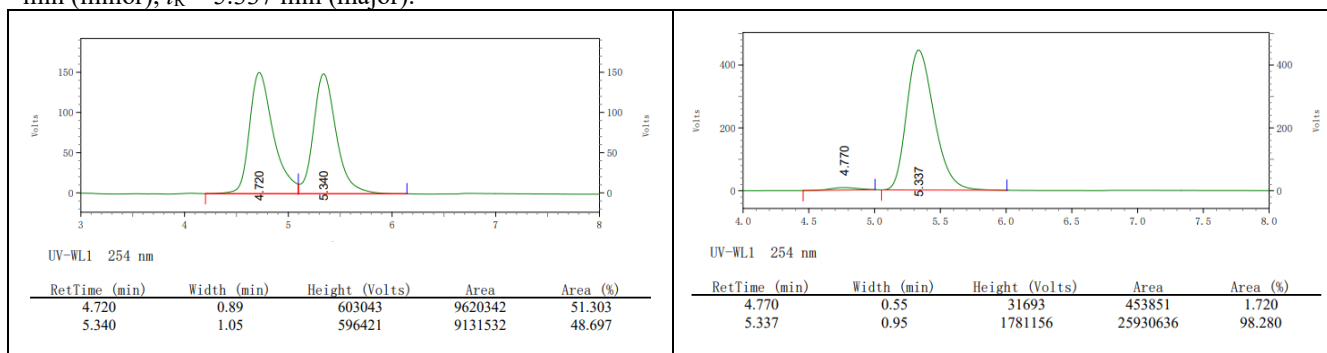

**Analytical dates of 2u-2x**

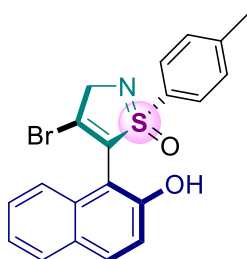

2u

40% ee  
d.r. > 20:1  
40% yield  
45% conv.  
S = 3

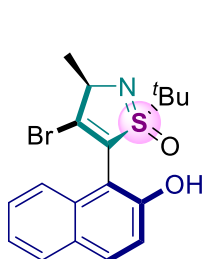

2v

80% ee  
d.r. > 20:1  
45% yield  
48% conv.  
S = 20

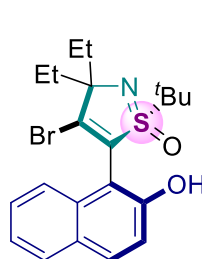

2w

27% ee  
d.r. > 20:1  
25% yield  
28% conv.  
S = 2

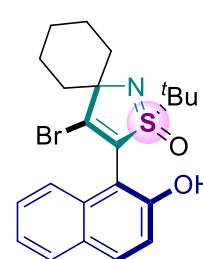

2x

17% ee  
d.r. > 20:1  
25% yield  
29% conv.  
S = 1.5

**(S)-N-(3-(2-hydroxynaphthalen-1-yl)prop-2-yn-1-yl)-4-methylbenzenesulfonamide(1u)**

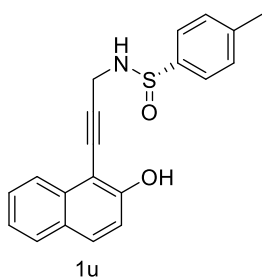

**Appearance:** white solid.

**Yield:** 47%, 47 mg. ee = 33%.

**<sup>1</sup>H NMR** (400 MHz, CDCl<sub>3</sub>) δ 8.21 (s, 1H), 7.92 (d, *J* = 8.3 Hz, 1H), 7.70 (t, *J* = 9.6 Hz, 2H), 7.64 (d, *J* = 8.0 Hz, 2H), 7.43 (t, *J* = 7.6 Hz, 1H), 7.30 (t, *J* = 8.6 Hz, 3H), 7.17 (d, *J* = 9.0 Hz, 1H), 4.90 (s, 1H), 4.07 (s, 1H), 4.05 (s, 1H), 2.37 (s, 3H).

**<sup>13</sup>C NMR** (100 MHz, CDCl<sub>3</sub>) δ 158.83, 141.86, 139.34, 133.41, 130.35, 129.72, 128.05, 127.95, 126.95, 125.93, 124.52, 123.53, 117.67, 101.84, 97.36, 79.32, 32.95, 21.31.

**HRMS (ESI)** *m/z* Calcd for [C<sub>20</sub>H<sub>17</sub>NNaO<sub>2</sub>S, M + Na]<sup>+</sup>: 358.0878, Found: 358.0874.

**Optical Rotation:** [α]<sub>D</sub><sup>25</sup> = 9.05° (*c* = 1.0, DCM).

**HPLC analysis:** Chiralcel IA-H (Hexane/*i*-PrOH = 85:15, flow rate = 1.0 mL/min, wave length = 254 nm), *t*<sub>R</sub> = 9.310 min (major), *t*<sub>R</sub> = 10.707 min (minor).

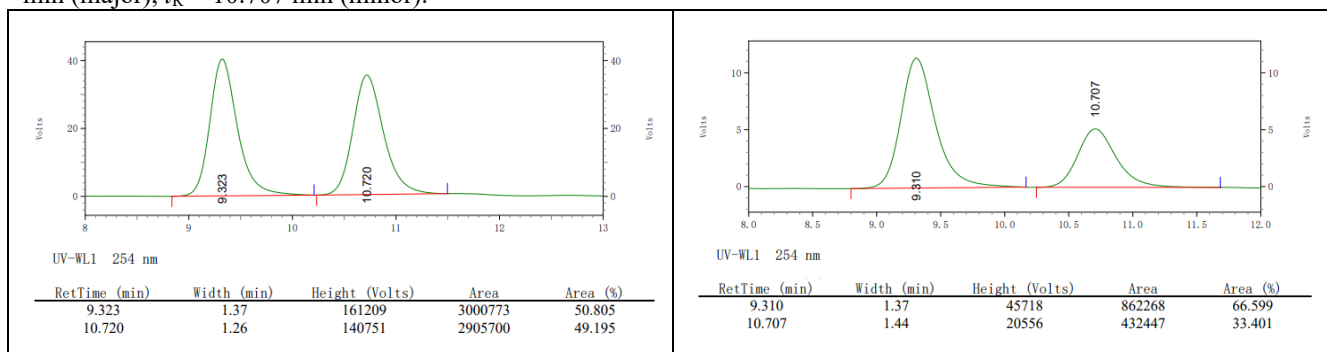

**(a*S*,*S*)-4-bromo-5-(2-hydroxynaphthalen-1-yl)-1-(*p*-tolyl)-3H-isothiazole 1-oxide(2u)**

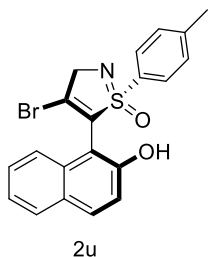

**Appearance:** Yellow solid.

**Yield:** 40%, 49 mg. ee = 40%.

**<sup>1</sup>H NMR** (400 MHz, CDCl<sub>3</sub>) δ 8.23 (s, 1H), 7.87 (dt, *J* = 7.1, 3.6 Hz, 1H), 7.78 (d, *J* = 8.7 Hz, 1H), 7.72 (d, *J* = 8.3 Hz, 2H), 7.33 – 7.19 (m, 3H), 7.14 (d, *J* = 8.0 Hz, 2H), 7.06 – 6.92 (m, 1H), 5.13 – 4.87 (m, 2H), 2.28 (s, 3H).

**<sup>13</sup>C NMR** (100 MHz, CDCl<sub>3</sub>) δ 167.98, 154.03, 145.67, 143.08, 134.28, 133.72, 132.58, 132.23, 131.67, 130.02, 129.90, 128.67, 128.35, 126.99, 123.56, 122.69, 119.62, 106.16, 66.49, 21.56.

**HRMS (ESI)** *m/z* Calcd for [C<sub>20</sub>H<sub>16</sub>BrNNaO<sub>2</sub>S, M + Na]<sup>+</sup>: 435.9983, Found: 435.9989.

**Optical Rotation:** [α]<sub>D</sub><sup>25</sup> = 23.03° (*c* = 1.0, DCM).

**HPLC analysis:** Chiralcel OD-H (Hexane/*i*-PrOH = 85:15, flow rate = 1.0 mL/min, wave length = 254 nm), *t*<sub>R</sub> = 11.853 min (minor), *t*<sub>R</sub> = 14.923 min (major).

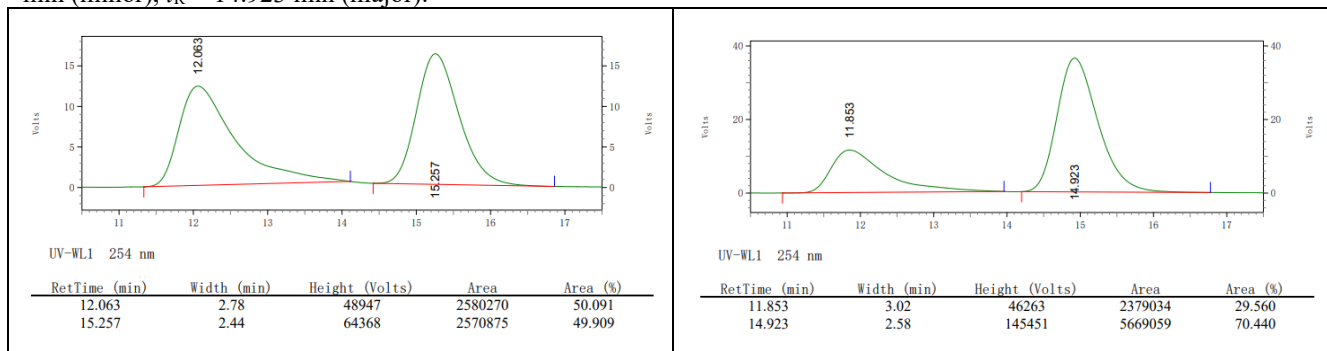

**(S)-N-((S)-4-(2-hydroxynaphthalen-1-yl)but-3-yn-2-yl)-2-methylpropane-sulfonamide (1v)**

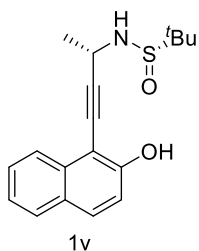

**Appearance:** white solid.

**Yield:** 48%, 45 mg. **ee** = 74%.

**<sup>1</sup>H NMR** (400 MHz, CDCl<sub>3</sub>) δ 9.02 (s, 1H), 8.02 (d, *J* = 8.4 Hz, 1H), 7.73 (d, *J* = 8.2 Hz, 1H), 7.69 (d, *J* = 8.9 Hz, 1H), 7.47 (t, *J* = 7.6 Hz, 1H), 7.31 (t, *J* = 7.5 Hz, 1H), 7.15 (dd, *J* = 8.9, 1.7 Hz, 1H), 4.48 (ddt, *J* = 9.8, 7.0, 3.5 Hz, 1H), 3.89 (s, 1H), 1.66 (d, *J* = 6.9 Hz, 3H), 1.27 (s, 9H).

**<sup>13</sup>C NMR** (100 MHz, CDCl<sub>3</sub>) δ 158.77, 133.52, 130.28, 128.07, 127.91, 126.85, 124.48, 123.40, 118.31, 101.61, 100.37, 80.03, 55.94, 43.06, 22.73, 22.41.

**HRMS (ESI)** *m/z* Calcd for [C<sub>18</sub>H<sub>21</sub>NNaO<sub>2</sub>S, M + Na]<sup>+</sup>: 338.1191, Found: 338.1185.

**Optical Rotation:** [α]<sub>D</sub><sup>25</sup> = 33.53° (*c* = 1.0, DCM).

**HPLC analysis:** Chiralcel IA-H (Hexane/*i*-PrOH = 90:10, flow rate = 1.0 mL/min, wave length = 254 nm), *t*<sub>R</sub> = 7.290 min (minor), *t*<sub>R</sub> = 10.147 min (major).

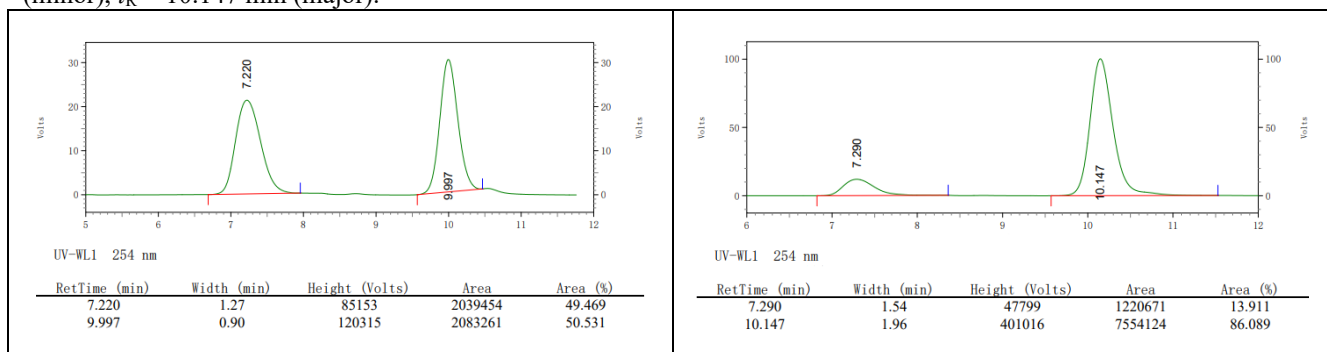

**(aS, 1S, 3R)-4-bromo-1-(tert-butyl)-5-(2-hydroxynaphthalen-1-yl)-3-methyl-3H-1λ<sup>6</sup>-isothiazole 1-oxide (2v)**

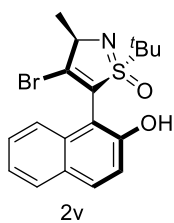

**Appearance:** white solid.

**Yield:** 45%, 53 mg. **ee** = 80%.

**<sup>1</sup>H NMR** (400 MHz, CDCl<sub>3</sub>) δ 8.96 (s, 1H), 7.95 – 7.74 (m, 2H), 7.55 – 7.47 (m, 1H), 7.40 (dd, *J* = 16.0, 8.0 Hz, 2H), 7.25 (d, *J* = 8.0 Hz, 1H), 5.01 (q, *J* = 6.9 Hz, 1H), 1.64 (d, *J* = 6.9 Hz, 3H), 1.35 (s, 9H).

**<sup>13</sup>C NMR** (100 MHz, CDCl<sub>3</sub>) δ 154.41, 151.28, 132.37, 131.05, 130.41, 129.07, 128.99, 127.36, 123.67, 123.24, 120.15, 107.85, 71.61, 62.89, 24.21, 21.99.

**HRMS (ESI)** *m/z* Calcd for [C<sub>18</sub>H<sub>20</sub>BrNNaO<sub>2</sub>S, M + Na]<sup>+</sup>: 416.0296, Found: 416.0289.

**Optical Rotation:** [α]<sub>D</sub><sup>25</sup> = 45.6° (*c* = 1.0, DCM).

**HPLC analysis:** Chiralcel IA-H (Hexane/*i*-PrOH = 95:5, flow rate = 1.0 mL/min, wave length = 254 nm), *t*<sub>R</sub> = 10.927 min (major), *t*<sub>R</sub> = 13.483 min (minor).

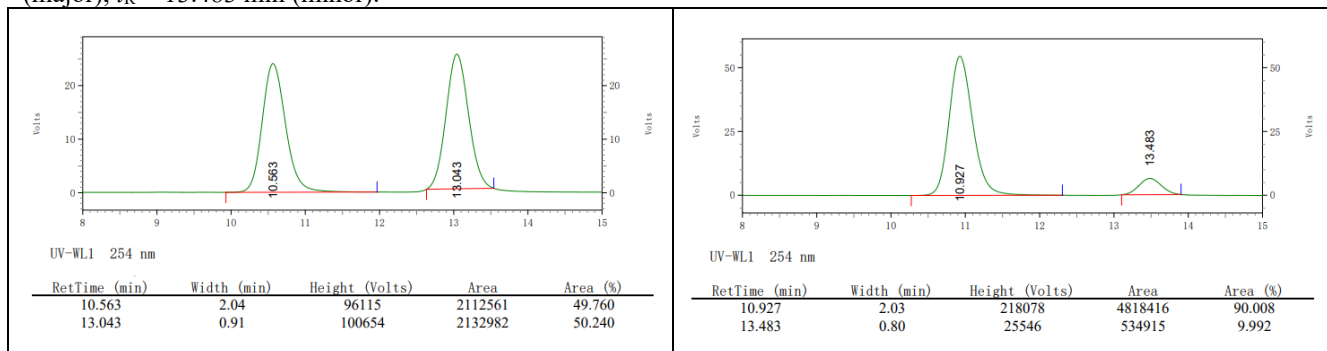

**(S)-N-(3-ethyl-1-(2-hydroxynaphthalen-1-yl)pent-1-yn-3-yl)-2-methylpropane-2-sulfonamide(1w)**

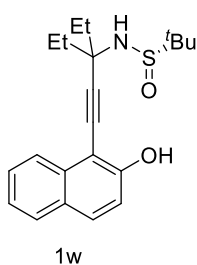

**Appearance:** white solid.

**Yield:** 60%, 64 mg. **ee** = 9%.

**<sup>1</sup>H NMR** (400 MHz, CDCl<sub>3</sub>) δ 9.39 (s, 1H), 8.00 (d, *J* = 8.3 Hz, 1H), 7.72 (d, *J* = 8.1 Hz, 1H), 7.68 (d, *J* = 9.0 Hz, 1H), 7.47 (t, *J* = 7.6 Hz, 1H), 7.30 (t, *J* = 7.5 Hz, 1H), 7.15 (d, *J* = 8.9 Hz, 1H), 3.42 (s, 1H), 2.07 (dt, *J* = 14.5, 7.4 Hz, 1H), 1.94 (dp, *J* = 22.2, 7.7 Hz, 2H), 1.79 (dt, *J* = 13.9, 7.2 Hz, 1H), 1.28 (s, 9H), 1.15 (t, *J* = 7.4 Hz, 3H), 1.07 (t, *J* = 7.4 Hz, 3H).

**<sup>13</sup>C NMR** (100 MHz, CDCl<sub>3</sub>) δ 158.96, 133.75, 130.13, 128.09, 127.94, 126.82, 124.45, 123.28,

118.55, 101.78, 80.84, 57.58, 56.14, 32.14, 31.91, 22.58, 8.48, 8.06.

**HRMS (ESI)** *m/z* Calcd for [C<sub>21</sub>H<sub>27</sub>NNaO<sub>2</sub>S, M + Na]<sup>+</sup>: 380.1660, Found: 380.1665.

**Optical Rotation:** [α]<sub>D</sub><sup>25</sup> = 5.05° (*c* = 1.0, DCM).

**HPLC analysis:** Chiralcel OD-H (Hexane/*i*-PrOH = 85:15, flow rate = 1.0 mL/min, wave length = 254 nm), *t<sub>R</sub>* = 6.207 min (minor), *t<sub>R</sub>* = 10.893 min (major).

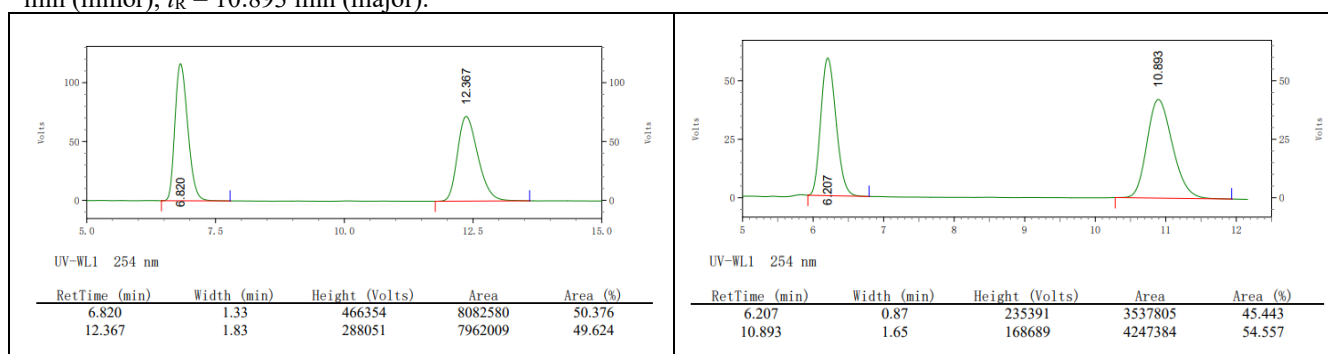

**(aS,S)-4-bromo-1-(tert-butyl)-3,3-diethyl-5-(2-hydroxynaphthalen-1-yl)-3H-1λ<sup>6</sup>-isothiazole 1-oxide(2w)**

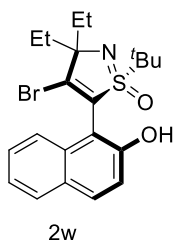

**Appearance:** white solid.

**Yield:** 25%, 33 mg. **ee** = 27%.

**<sup>1</sup>H NMR** (400 MHz, CDCl<sub>3</sub>) δ 9.04 (s, 1H), 7.89 – 7.80 (m, 2H), 7.50 (d, *J* = 4.0 Hz, 2H), 7.38 (dt, *J* = 8.1, 4.0 Hz, 1H), 7.25 (d, *J* = 9.2 Hz, 1H), 2.12 (dq, *J* = 12.7, 6.5, 5.6 Hz, 1H), 2.06 – 1.99 (m, 1H), 1.86 (dt, *J* = 14.0, 7.2 Hz, 1H), 1.74 (dt, *J* = 14.6, 7.5 Hz, 1H), 1.37 (s, 9H), 1.20 (t, *J* = 7.4 Hz, 3H), 0.99 (t, *J* = 7.3 Hz, 3H).

**<sup>13</sup>C NMR** (100 MHz, CDCl<sub>3</sub>) δ 155.39, 154.29, 132.13, 131.61, 130.68, 129.05, 127.24, 123.63, 123.49,

120.25, 108.73, 83.83, 63.91, 34.31, 30.64, 24.70, 9.08, 8.11.

**HRMS (ESI)** *m/z* Calcd for [C<sub>21</sub>H<sub>26</sub>BrNNaO<sub>2</sub>S, M + Na]<sup>+</sup>: 458.0765, Found: 458.0760.

**Optical Rotation:** [α]<sub>D</sub><sup>25</sup> = 17.25° (*c* = 1.0, DCM).

**HPLC analysis:** Chiralcel IC-H (Hexane/*i*-PrOH = 98.5:1.5, flow rate = 1.0 mL/min, wave length = 254 nm), *t<sub>R</sub>* = 13.870 min (major), *t<sub>R</sub>* = 16.013 min (minor).

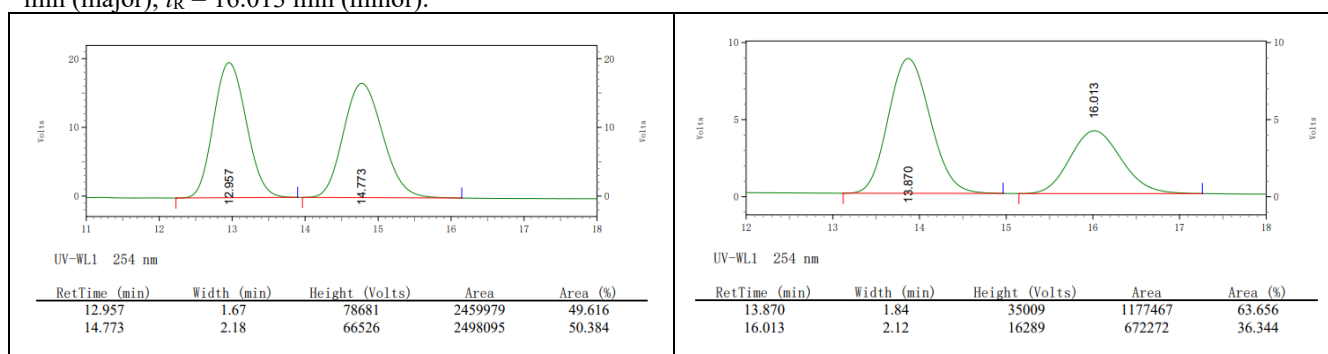



**(S)-N-(1-((2-hydroxynaphthalen-1-yl)ethynyl)cyclohexyl)-2-methylpropane-2-sulfinamide(1x)**

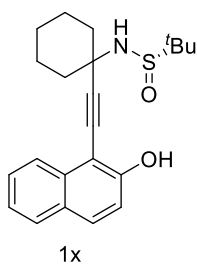

**Appearance:** white solid.

**Yield:** 65%, 72 mg. **ee** = 7%.

**<sup>1</sup>H NMR** (400 MHz, CDCl<sub>3</sub>) δ 9.41 (s, 1H), 8.03 (d, *J* = 8.3 Hz, 1H), 7.73 (d, *J* = 8.1 Hz, 1H), 7.68 (d, *J* = 8.9 Hz, 1H), 7.54 – 7.46 (m, 1H), 7.36 – 7.28 (m, 1H), 7.15 (d, *J* = 9.0 Hz, 1H), 3.48 (s, 1H), 2.33 (d, *J* = 12.7 Hz, 1H), 2.02 (d, *J* = 13.3 Hz, 1H), 1.90 (td, *J* = 11.9, 11.3, 3.8 Hz, 1H), 1.80 (dt, *J* = 9.9, 5.3 Hz, 4H), 1.67 (ddd, *J* = 23.7, 12.1, 5.9 Hz, 2H), 1.40 – 1.32 (m, 1H), 1.28 (s, 9H).

**<sup>13</sup>C NMR** (100 MHz, CDCl<sub>3</sub>) δ 158.89, 133.84, 130.14, 128.11, 127.94, 126.87, 124.46, 123.26,

118.54, 102.28, 101.74, 80.65, 55.89, 54.44, 39.64, 38.52, 25.36, 23.02, 22.63, 22.46.

**HRMS (ESI)** *m/z* Calcd for [C<sub>22</sub>H<sub>27</sub>NNaO<sub>2</sub>S, M + Na]<sup>+</sup>: 392.5128, Found: 392.5135.

**Optical Rotation:** [α]<sub>D</sub><sup>25</sup> = 3.4° (*c* = 1.0, DCM).

**HPLC analysis:** Chiralcel OD-H (Hexane/*i*-PrOH = 90:10, flow rate = 1.0 mL/min, wave length = 254 nm), *t*<sub>R</sub> = 5.847 min (minor), *t*<sub>R</sub> = 10.987 min (major).

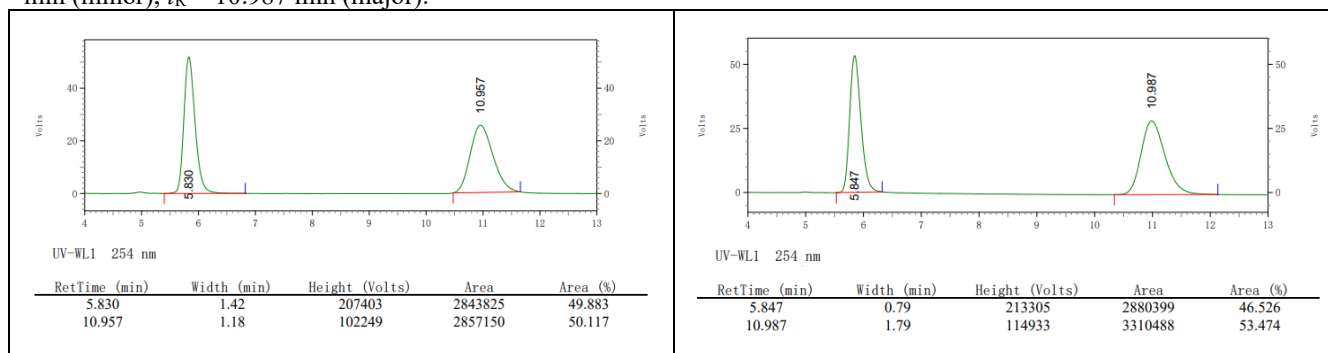

**(aS,S)-4-bromo-2-(tert-butyl)-3-(2-hydroxynaphthalen-1-yl)-2λ<sup>6</sup>-thia-1-azaspiro[4.5]deca-1,3-diene 2-oxide(2x)**

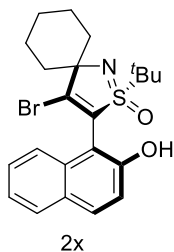

**Appearance:** white solid.

**Yield:** 25%, 33.5 mg. **ee** = 17%.

**<sup>1</sup>H NMR** (400 MHz, CDCl<sub>3</sub>) δ 9.10 (s, 1H), 7.88 – 7.78 (m, 2H), 7.52 – 7.42 (m, 2H), 7.37 (t, *J* = 7.0 Hz, 1H), 7.24 (d, *J* = 8.9 Hz, 1H), 2.14 – 1.96 (m, 4H), 1.85 – 1.72 (m, 3H), 1.69 – 1.63 (m, 1H), 1.54 (d, *J* = 8.4 Hz, 1H), 1.32 (s, 9H), 1.25 (dd, *J* = 9.8, 6.0 Hz, 1H).

**<sup>13</sup>C NMR** (100 MHz, CDCl<sub>3</sub>) δ 157.22, 154.26, 132.05, 130.54, 129.42, 129.00, 127.17, 123.59, 123.57, 120.17, 108.53, 80.07, 62.88, 38.74, 37.12, 25.28, 24.33, 22.93, 22.11.

**HRMS (ESI)** *m/z* Calcd for [C<sub>22</sub>H<sub>26</sub>BrNNaO<sub>2</sub>S, M + Na]<sup>+</sup>: 470.0765, Found: 470.0770.

**Optical Rotation:** [α]<sub>D</sub><sup>25</sup> = 42.1° (*c* = 1.0, DCM).

**HPLC analysis:** Chiralcel OD-H (Hexane/*i*-PrOH = 98:2, flow rate = 1.0 mL/min, wave length = 254 nm), *t*<sub>R</sub> = 4.580 min (major), *t*<sub>R</sub> = 5.593 min (minor).

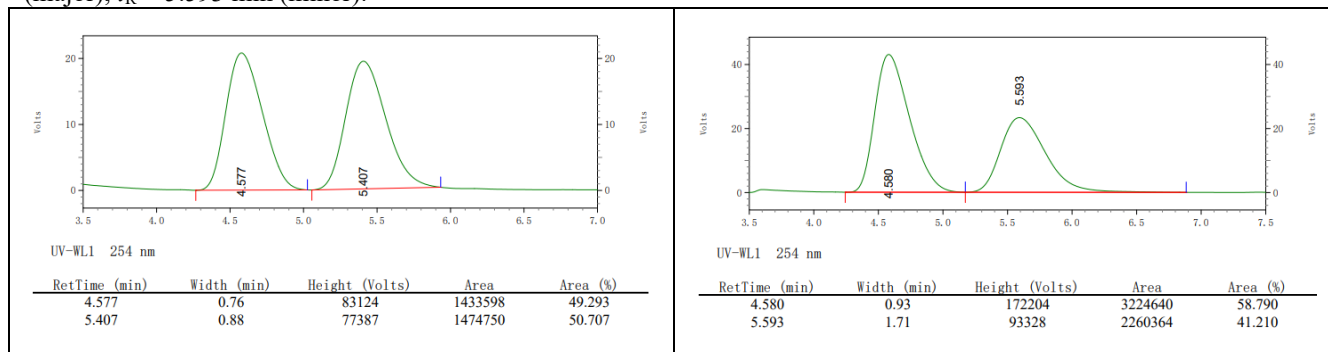

## Preparative gram-scale reaction for **1k**

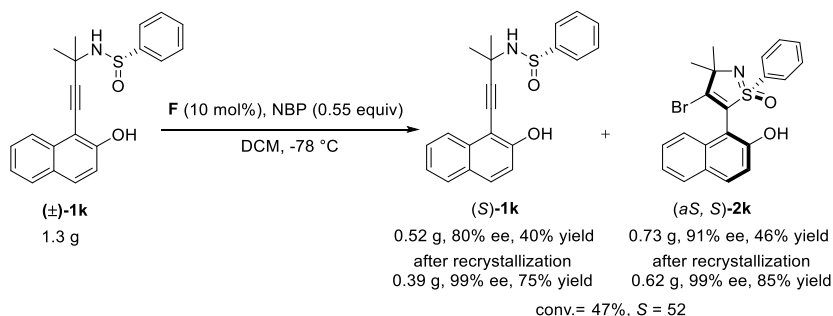

A flame-dried Schlenk tube equipped with a magnetic stirring bar, was charged with **(±)-1k** (1.3 g, 3.72 mmol, 1.0 equiv), and catalyst **F** (10 mol%), DCM (150.0 mL) was injected into the tube at -78 °C. After stirring for 10min, the NBP (464 mg, 2.05 mmol, 0.55 equiv) was added into the mixture, after the reaction was completed, monitored by TLC. The reaction was quenched with saturated ammonium chloride solution, and extracted with DCM (3×50 mL), all organic layer was removed under reduced pressure, and the residue was purified by column chromatography (PE:EA = 4:1) to afford **(S)-1k** (0.52g, 80% ee, 40% yield) and the product **(aS, S)-2k** (0.73g, 91% ee, 46% yield); after recrystallization (Both **(aS, S)-2k** and **(S)-1k** recrystallization conditions were DCM/hexane = 1:1 under room temperature) to afford the desired **(S)-1k** (0.39 g, 99% ee, 75% yield) and **(aS, S)-2k** (0.62 g, 99% ee, 85% yield) all as white solid.

## Transformation experiments of **(S)-1k**

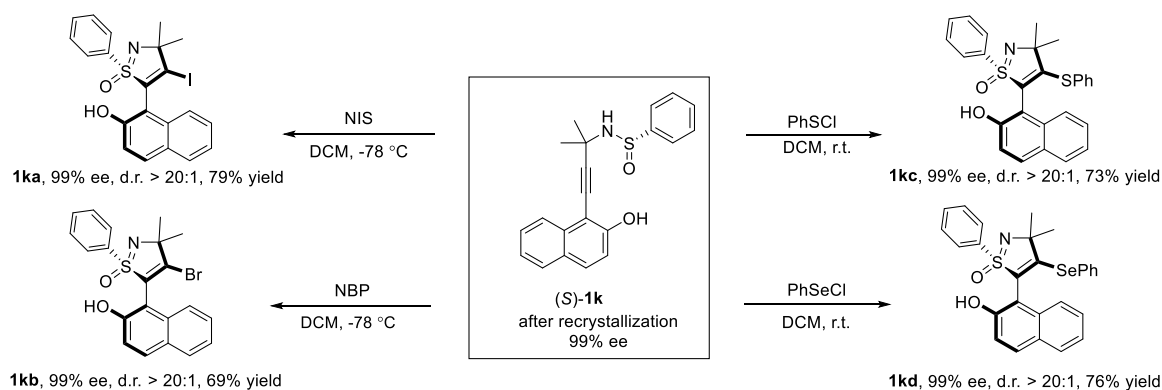

A flame-dried Schlenk tube equipped with a magnetic stirring bar, was charged with **(S)-1k** (0.1 mmol, 1 equiv), DCM (4.0 mL) was injected into the tube at corresponding temperature. After stirring for 5min, the corresponding electrophile reagents (NIS, NBP, PhSCl, PhSeCl, 1.1 equiv) was added into the mixture, after the reaction was completed, monitored by TLC. The reaction was quenched with saturated ammonium chloride solution, and extracted with DCM (3×5.0 mL), all organic layer was removed under reduced pressure, and the residue was purified by column chromatography (PE: EA = 5:1) to afford the desired product **1ka-1kd**.

**(aR, R)-5-(2-hydroxynaphthalen-1-yl)-4-iodo-3,3-dimethyl-1-phenyl-3H-isothiazole 1-oxide (1ka)**

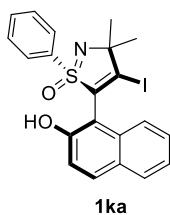

**Appearance:** white solid.

**Yield:** 79%, 37.5 mg. **ee** = 99%.

**<sup>1</sup>H NMR** (400 MHz, CDCl<sub>3</sub>) δ 8.19 (s, 1H), 7.83 (d, *J* = 7.8 Hz, 2H), 7.76 (d, *J* = 8.9 Hz, 1H), 7.67 (d, *J* = 7.8 Hz, 1H), 7.43 (t, *J* = 7.5 Hz, 1H), 7.32 (t, *J* = 7.7 Hz, 2H), 7.27 (d, *J* = 8.1 Hz, 1H), 7.18 (p, *J* = 7.1 Hz, 2H), 6.86 (d, *J* = 8.2 Hz, 1H), 1.80 (s, 6H).

**<sup>13</sup>C NMR** (100 MHz, CDCl<sub>3</sub>) δ 153.70, 136.40, 136.18, 134.08, 132.01, 131.41, 129.96, 129.09, 128.66, 128.35, 126.97, 123.55, 122.35, 119.62, 108.56, 78.86, 31.32, 30.37.

**HRMS (ESI)** *m/z* Calcd for [C<sub>21</sub>H<sub>18</sub>INNaO<sub>2</sub>S, M + Na]<sup>+</sup>: 497.9995, Found: 497.9991.

**Optical Rotation:** [α]<sub>D</sub><sup>25</sup> = -190.0° (*c* = 1.0, DCM).

**HPLC analysis:** Chiralcel OD-H (Hexane/*i*-PrOH = 85:15, flow rate = 1.0 mL/min, wave length = 254 nm), *t*<sub>R</sub> = 5.233 min (major), *t*<sub>R</sub> = 7.997 min (minor).

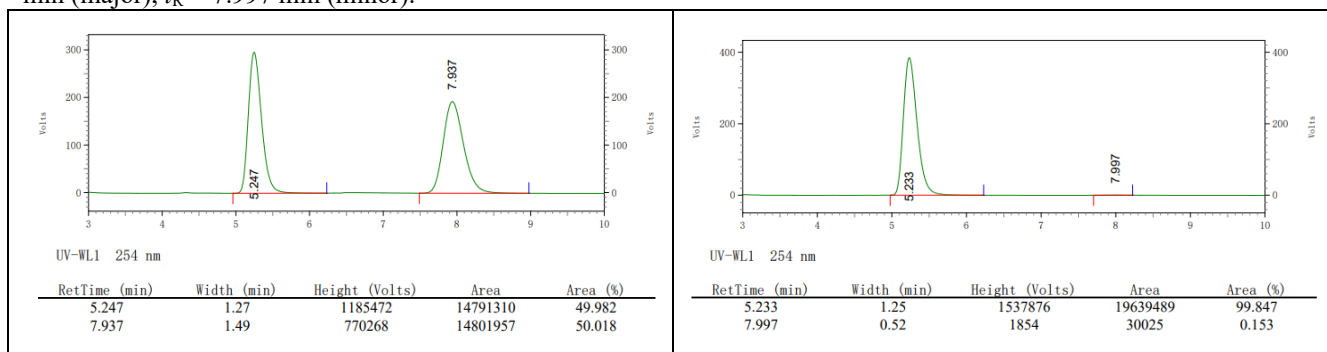

**(aR, R)-4-bromo-5-(2-hydroxynaphthalen-1-yl)-3,3-dimethyl-1-phenyl-3H-isothiazole 1-oxide (1kb)**

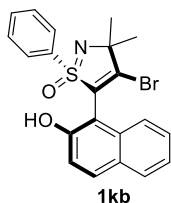

**Appearance:** white solid.

**Yield:** 69%, 29.5 mg. **ee** = 99%.

**<sup>1</sup>H NMR** (400 MHz, DMSO-*d*<sub>6</sub>) δ 10.14 (s, 1H), 7.82 (d, *J* = 9.0 Hz, 1H), 7.68 (d, *J* = 8.1 Hz, 1H), 7.60 (d, *J* = 7.4 Hz, 2H), 7.54 (t, *J* = 7.3 Hz, 1H), 7.39 (t, *J* = 7.7 Hz, 2H), 7.25 (d, *J* = 8.9 Hz, 1H), 7.07 (t, *J* = 7.4 Hz, 1H), 6.82 (t, *J* = 7.6 Hz, 1H), 6.45 (d, *J* = 8.4 Hz, 1H), 1.71 (s, 3H), 1.66 (s, 3H).

**<sup>13</sup>C NMR** (100 MHz, DMSO-*d*<sub>6</sub>) δ 154.95, 153.42, 139.35, 134.36, 133.56, 132.09, 131.40, 129.56, 129.21, 128.00, 127.25, 126.09, 122.59, 122.00, 118.26, 105.95, 74.37, 30.81, 28.76.

**HRMS (ESI)** *m/z* Calcd for [C<sub>21</sub>H<sub>18</sub>BrNNaO<sub>2</sub>S, M + Na]<sup>+</sup>: 450.0134, Found: 450.0139.

**Optical Rotation:** [α]<sub>D</sub><sup>25</sup> = -167.0° (*c* = 1.0, DCM).

**HPLC analysis:** Chiralcel OD-H (Hexane/*i*-PrOH = 85:15, flow rate = 1.0 mL/min, wave length = 254 nm), *t*<sub>R</sub> = 5.477 min (major), *t*<sub>R</sub> = 8.367 min (minor).

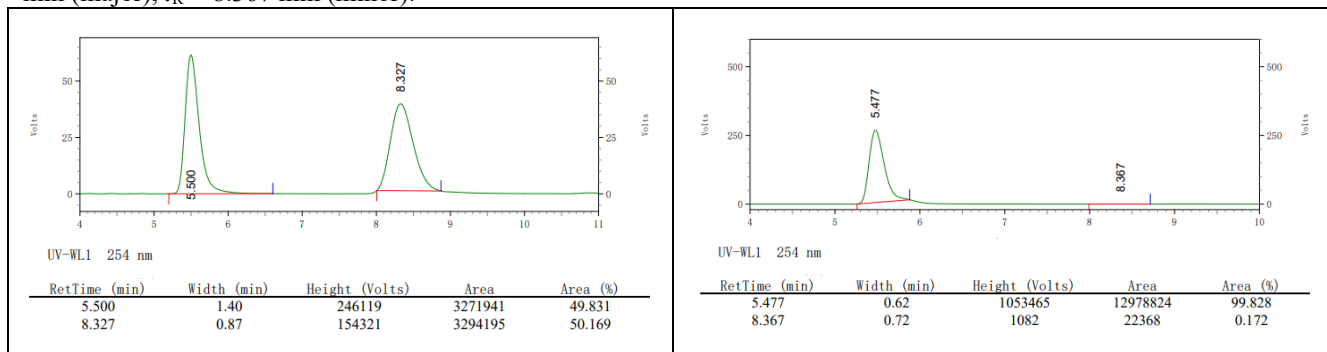

## Physical property comparison of 1kb and 2k by both chiral HPLC and normal HPLC

As shown in Supplementary Figure 1, **1kb**, obtained from **1k**, and **2k** were demonstrated to be enantiomers of each other by mixing either one with **rac-2k** and running chiral HPLC analysis.

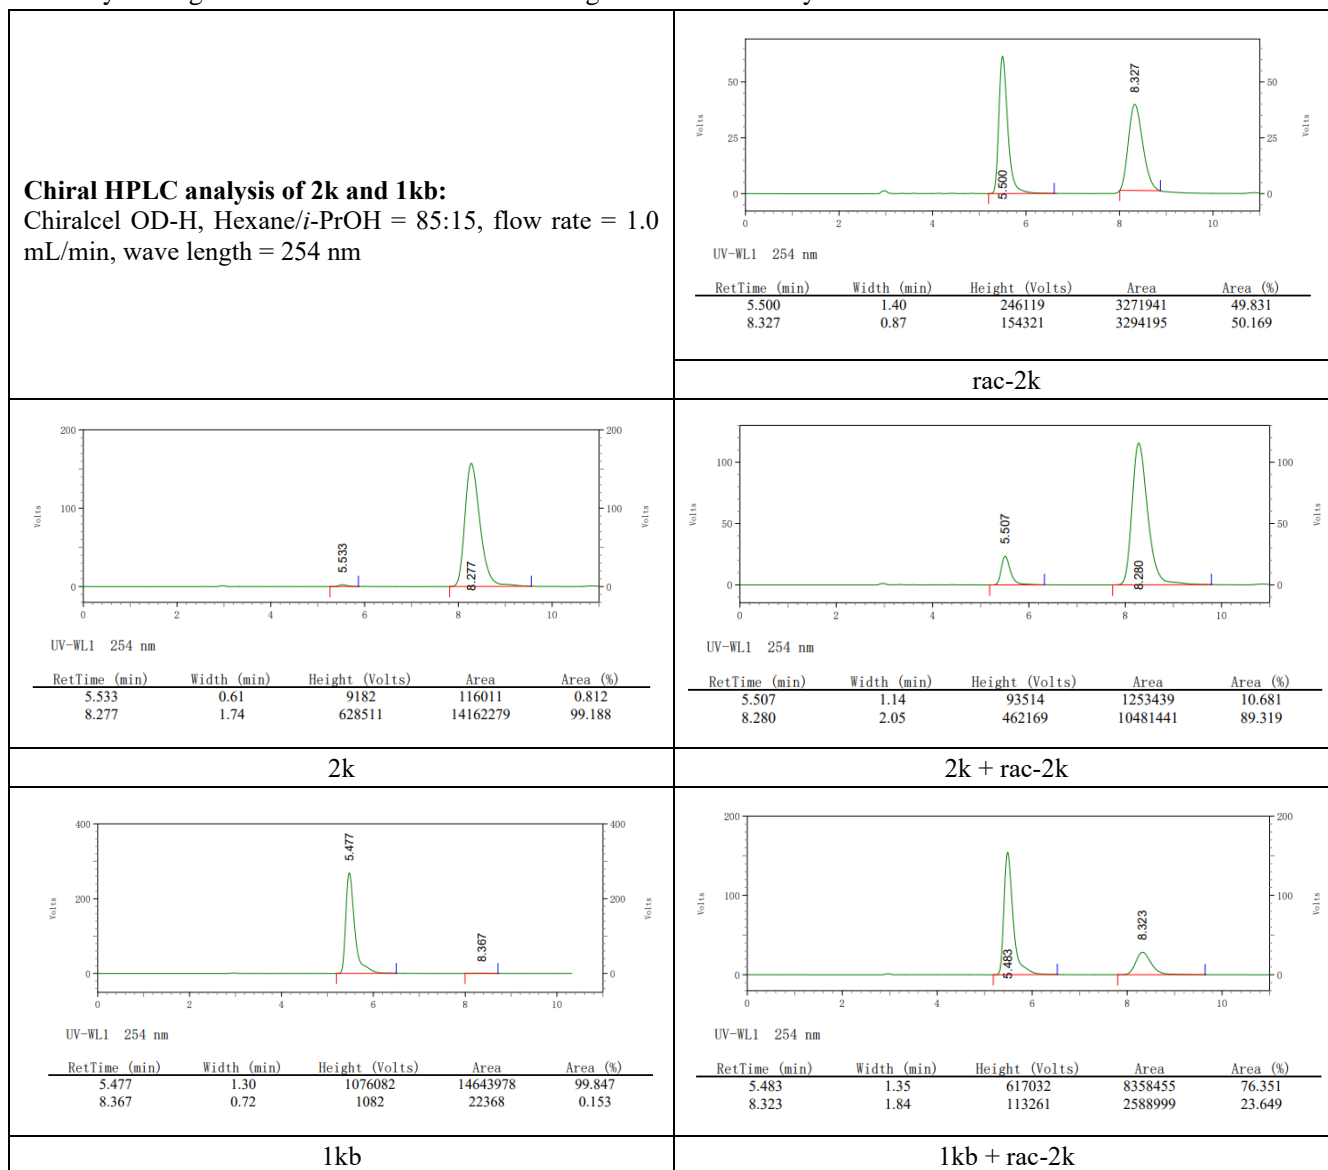

**Supplementary Figure 1. The chiral HPLC analysis of 1kb and 2k.**

Retention times of **1kb**, **2k** and **rac-2k** were identical in normal HPLC chromatograms, suggesting that they are not diastereomers.

**Regular HPLC analysis of 2k and 1kb:**

SHIMADZU(LC-20AD), C18(4.6\*250 mm, 5  $\mu$ m),  
Methanol/H<sub>2</sub>O = 75:25, flow rate = 1.0 mL/min, wave  
length = 254 nm.

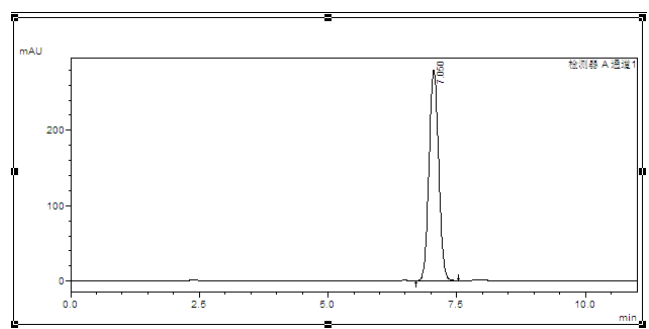

rac-2k,  $t_R = 7.050$  min

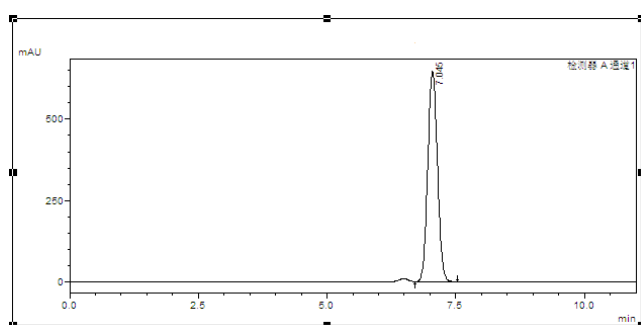

2k,  $t_R = 7.045$  min

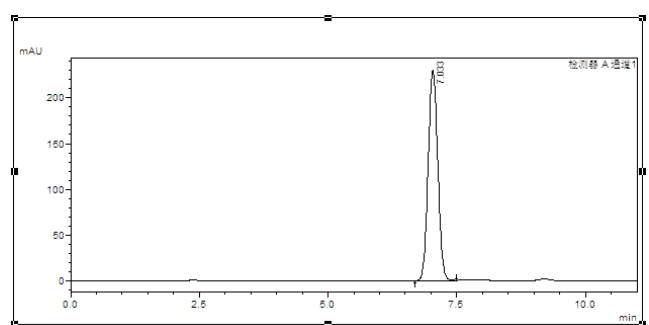

1kb,  $t_R = 7.033$  min

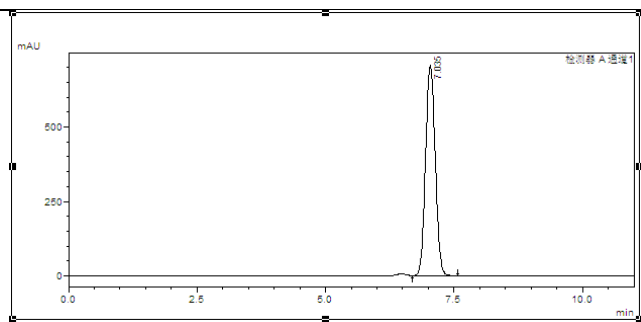

2k + rac-2k,  $t_R = 7.035$  min

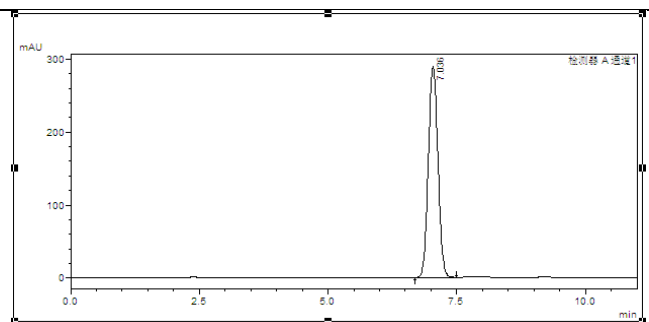

1kb + rac-2k,  $t_R = 7.036$  min

**Supplementary Figure 2. The regular HPLC analysis of 1kb and 2k.**

**(aR, R)-5-(2-hydroxynaphthalen-1-yl)-3,3-dimethyl-1-phenyl-4-(phenylthio)-3H-isothiazole 1-oxide (1kc)**

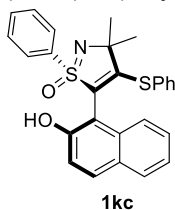

**Appearance:** white solid.

**Yield:** 76%, 33.4 mg. **ee** = 99%.

**<sup>1</sup>H NMR** (400 MHz, CDCl<sub>3</sub>) δ 8.44 (s, 1H), 7.79 – 7.72 (m, 2H), 7.40 (d, *J* = 7.9 Hz, 1H), 7.29 (dd, *J* = 13.6, 8.1 Hz, 2H), 7.25 – 7.17 (m, 3H), 7.15 – 7.09 (m, 1H), 6.95 (d, *J* = 8.4 Hz, 1H), 6.77 (dd, *J* = 6.0, 3.3 Hz, 1H), 6.75 (d, *J* = 8.9 Hz, 1H), 6.62 (q, *J* = 4.6, 3.5 Hz, 4H), 2.03 (s, 3H), 1.86 (s, 3H).

**<sup>13</sup>C NMR** (100 MHz, CDCl<sub>3</sub>) δ 165.70, 153.64, 136.89, 133.47, 132.69, 132.07, 131.24, 129.68, 128.71, 128.53, 128.31, 127.92, 127.72, 126.49, 125.48, 125.28, 123.18, 122.99, 122.76, 119.08, 106.72, 77.90, 33.10, 29.97.

**HRMS (ESI)** *m/z* Calcd for [C<sub>27</sub>H<sub>23</sub>NNaO<sub>2</sub>S<sub>2</sub>, M + Na]<sup>+</sup>: 480.1062, Found: 480.1068.

**Optical Rotation:** [α]<sub>D</sub><sup>25</sup> = -351.0° (*c* = 1.0, DCM).

**HPLC analysis:** Chiralcel OD-H (Hexane/*i*-PrOH = 85:15, flow rate = 1.0 mL/min, wave length = 254 nm), *t*<sub>R</sub> = 4.787 min (major), *t*<sub>R</sub> = 6.457 min (minor).

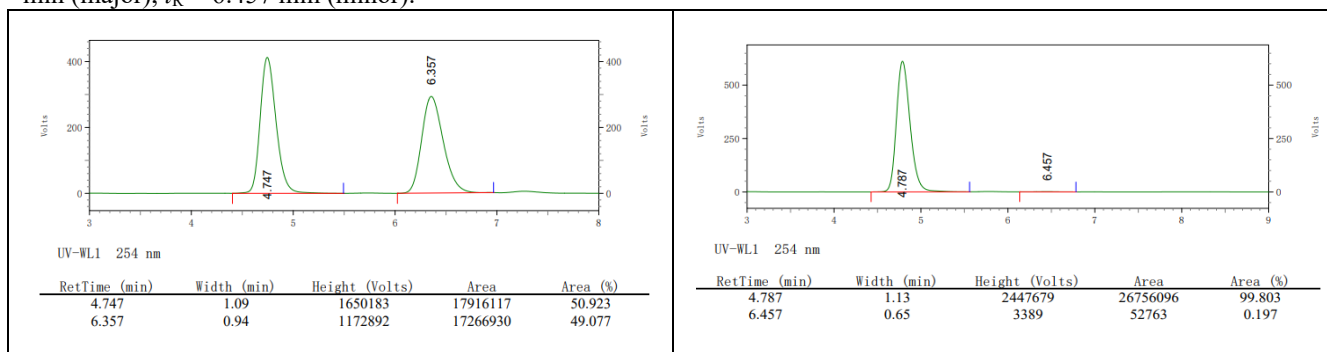

**(aR, R)-5-(2-hydroxynaphthalen-1-yl)-3,3-dimethyl-1-phenyl-4-(phenylselanyl)-3H-isothiazole 1-oxide (1kd)**

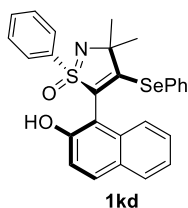

**Appearance:** white solid.

**Yield:** 73%, 38.4 mg. **ee** = 99%.

**<sup>1</sup>H NMR** (400 MHz, CDCl<sub>3</sub>) δ 8.29 (s, 1H), 7.76 (d, *J* = 7.7 Hz, 2H), 7.45 (d, *J* = 7.8 Hz, 1H), 7.36 – 7.28 (m, 2H), 7.23 (t, *J* = 7.6 Hz, 2H), 7.18 (d, *J* = 7.3 Hz, 1H), 7.14 (t, *J* = 7.2 Hz, 1H), 7.00 (d, *J* = 8.2 Hz, 1H), 6.87 (t, *J* = 6.8 Hz, 1H), 6.78 – 6.61 (m, 5H), 2.01 (s, 3H), 1.83 (s, 3H).

**<sup>13</sup>C NMR** (100 MHz, CDCl<sub>3</sub>) δ 164.59, 153.69, 136.74, 134.42, 133.54, 131.72, 131.25, 129.79,

129.59, 128.76, 128.43, 128.18, 127.93, 126.43, 123.03, 122.83, 122.68, 119.19, 106.96, 78.65, 33.30, 30.26.

**HRMS (ESI)** *m/z* Calcd for [C<sub>27</sub>H<sub>23</sub>NNaO<sub>2</sub>SSe, M + Na]<sup>+</sup>: 528.0507, Found: 528.0501.

**Optical Rotation:** [α]<sub>D</sub><sup>25</sup> = -677.0° (*c* = 1.0, DCM).

**HPLC analysis:** Chiralcel AD-H (Hexane/*i*-PrOH = 85:15, flow rate = 1.0 mL/min, wave length = 254 nm), *t*<sub>R</sub> = 6.107 min (major), *t*<sub>R</sub> = 20.987 min (minor).

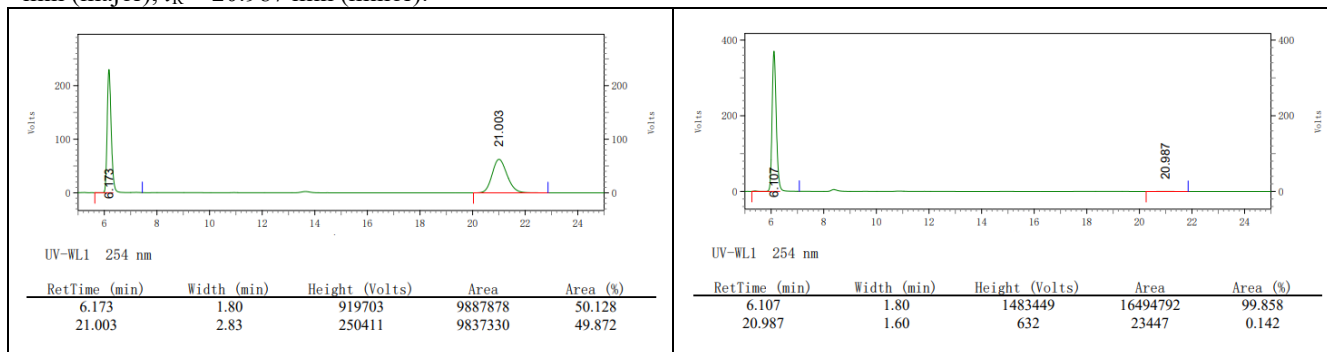

## Transformation experiments of (*aS*, *S*)-2k

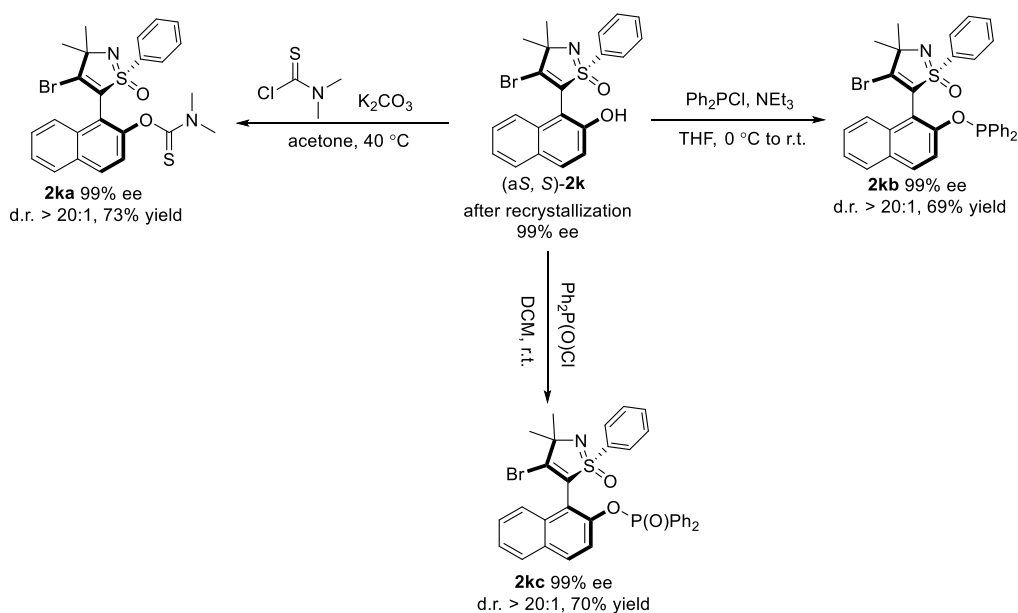

**Synthesis of 2ka:** A solution of (*aS*, *S*)-2k (0.1 mmol, 1 equiv) in 1 mL of acetone containing potassium carbonate (0.5 mmol, 69 mg) was stirred at 40 °C for 30 minutes then dimethylthiocarbamoyl chloride (0.2 mmol, 24.7 mg) was added. The reaction was refluxed overnight. After total disappearance of starting material (monitored by TLC), the solvent was evaporated under reduced pressure, the residue was treated with dichloromethane and washed with water. The organic layer was dried over anhydrous Na<sub>2</sub>SO<sub>4</sub>. The crude white solid obtained after evaporation of the solvent was purified by flash chromatography on silica gel (PE: EA = 5:1) to afford white solid **2ka**.

### (*aS,S*)-O-(1-(4-bromo-3,3-dimethyl-1-oxido-1-phenyl-3H-116-isothiazol-5-yl)naphthalen-2-yl)dimethylcarbamothioate(2ka)

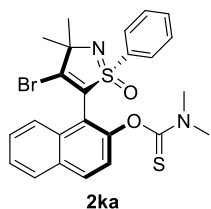

**Appearance:** white solid.

**Yield:** 73%, 38 mg. ee = 99%.

**<sup>1</sup>H NMR** (400 MHz, CDCl<sub>3</sub>) δ 7.88 (d, *J* = 8.9 Hz, 1H), 7.74 (d, *J* = 8.1 Hz, 1H), 7.70 (d, *J* = 7.7 Hz, 2H), 7.55 (d, *J* = 8.9 Hz, 1H), 7.35 (t, *J* = 7.2 Hz, 1H), 7.29 (s, 1H), 7.22 (t, *J* = 7.6 Hz, 2H), 7.00 (t, *J* = 7.5 Hz, 1H), 6.70 (d, *J* = 8.4 Hz, 1H), 3.49 (s, 6H), 1.81 (s, 3H), 1.76 (s, 3H).

**<sup>13</sup>C NMR** (100 MHz, CDCl<sub>3</sub>) δ 186.37, 154.09, 150.49, 138.67, 133.24, 133.16, 131.20, 130.89, 129.96, 129.39, 128.65, 128.16, 126.46, 125.44, 123.75, 123.14, 115.80, 75.11, 43.11, 38.99, 30.85, 29.02.

**HRMS (ESI)** *m/z* Calcd for [C<sub>24</sub>H<sub>23</sub>BrN<sub>2</sub>NaO<sub>2</sub>S<sub>2</sub>, M + Na]<sup>+</sup>: 537.0277, Found: 537.0273.

**Optical Rotation:** [α]<sub>D</sub><sup>25</sup> = 21.1° (*c* = 1.0, DCM).

**HPLC analysis:** Chiralcel OD-H (Hexane/*i*-PrOH = 85:15, flow rate = 1.0 mL/min, wave length = 254 nm), *t*<sub>R</sub> = 10.063 min (minor), *t*<sub>R</sub> = 11.997 min (major).

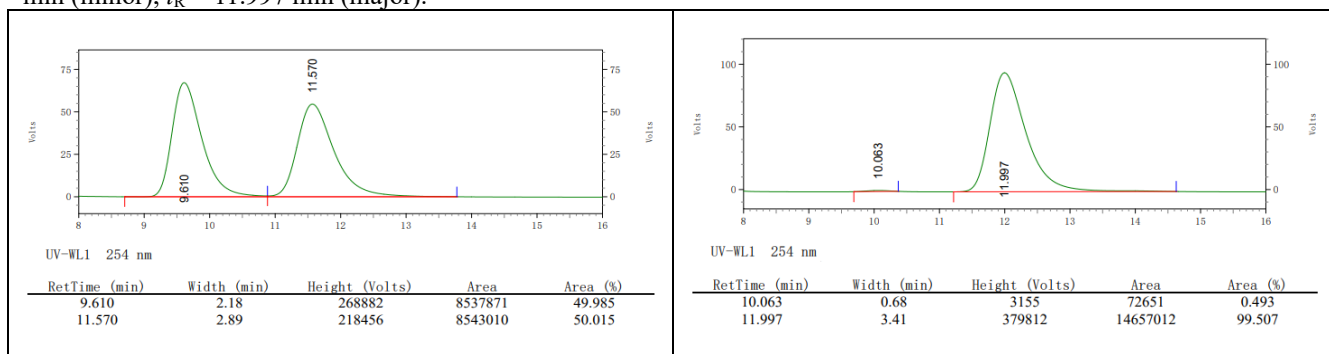

### Synthesis of **2kb**:

The (*aS*, *S*)-**2k** (0.1 mmol, 1.0 equiv) and DMAP (0.15 mmol, 1.5 equiv) were dissolved into 2.0 mL of THF under an argon atmosphere and cooled to 0 °C with an ice bath. A solution of chlorodiphenylphosphine (0.45 mmol, 4.5 equiv) in THF (1 mL) was added dropwise and followed by the addition of triethylamine (1.8 mmol, 18.0 equiv). The reaction mixture was allowed to warm to ambient temperature and stirred for 3.0 h. Filtration of triethylammonium chloride followed by flash column chromatography (PE: EA = 5: 1) on basic silica gel to give desired product **2kb**.

### (*aS,S*)-4-bromo-5-(2-((diphenylphosphanyl)oxy)naphthalen-1-yl)-3,3-dimethyl-1-phenyl-3H-isothiazole 1-oxide (**2kb**)

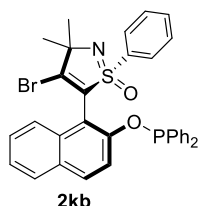

**Appearance:** white solid.

**Yield:** 69%, 42 mg. **ee** = 99%.

**<sup>1</sup>H NMR** (400 MHz, CDCl<sub>3</sub>) δ 8.28 (dd, *J* = 12.7, 7.3 Hz, 2H), 8.12 (dd, *J* = 13.0, 7.4 Hz, 2H), 7.84 (d, *J* = 9.1 Hz, 1H), 7.67 (td, *J* = 15.6, 14.3, 8.7 Hz, 4H), 7.50 (dq, *J* = 12.8, 7.6, 6.9 Hz, 6H), 7.41 (d, *J* = 7.4 Hz, 1H), 7.26 (d, *J* = 4.8 Hz, 2H), 7.16 (t, *J* = 7.6 Hz, 1H), 6.86 (t, *J* = 7.8 Hz, 1H), 6.53 (d, *J* = 8.5 Hz, 1H), 1.78 (s, 3H), 1.51 (s, 3H).

**<sup>13</sup>C NMR** (100 MHz, CDCl<sub>3</sub>) δ 154.27, 149.07, 149.00, 138.90, 133.40, 132.57, 132.47, 131.87, 131.76, 131.67, 131.15, 130.41, 129.82, 129.70, 129.53, 128.85, 128.79, 128.66, 128.59, 128.45, 127.98, 126.51, 124.72, 123.02, 119.01, 112.39, 75.30, 30.10, 29.12.

**HRMS (ESI)** *m/z* Calcd for [C<sub>33</sub>H<sub>27</sub>BrNNaO<sub>2</sub>PS, M + Na]<sup>+</sup>: 634.0576, Found: 634.0574.

**Optical Rotation:** [α]<sub>D</sub><sup>25</sup> = -90° (*c* = 1.0, DCM).

**HPLC analysis:** Chiralcel IA-H (Hexane/*i*-PrOH = 80:20, flow rate = 1.0 mL/min, wave length = 254 nm), *t<sub>R</sub>* = 20.280 min (minor), *t<sub>R</sub>* = 23.493 min (major).

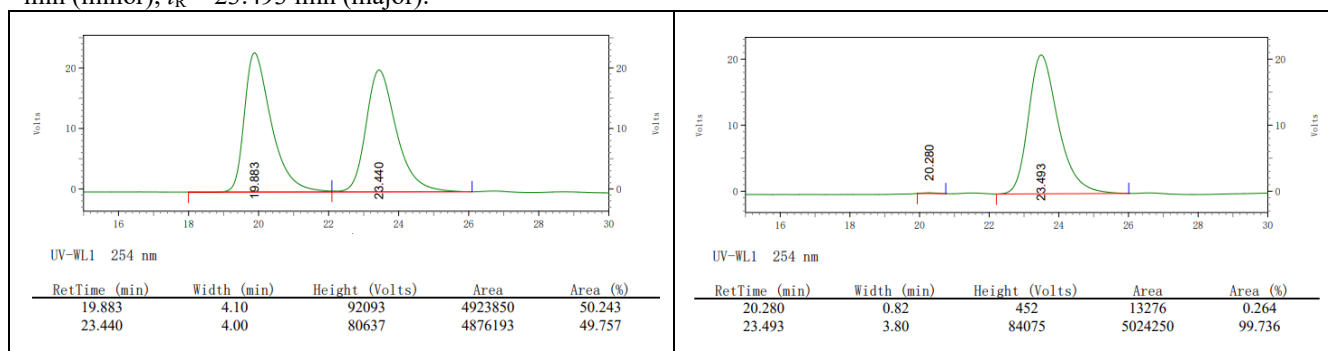



### Synthesis of 2kc:

To a solution of (*aS, S*)-**2k** (0.1 mmol, 1.0 equiv) in DCM (2.0 mL) was added triethylamine (0.13 mmol, 1.3 equiv), followed by catalytic DMAP. Diphenylphosphinic chloride (0.11 mmol, 1.1 equiv) was added dropwise, and the resulting mixture was allowed to stir at r.t. for 3h. The mixture was added to saturated NH<sub>4</sub>Cl solution (5 mL). The layers were separated, and the aqueous layer was extracted with DCM. The combined organic layers were washed with saturated NaHCO<sub>3</sub> and water, then dried over Na<sub>2</sub>SO<sub>4</sub>, filtered, and concentrated in vacuo to afford the crude product, which was purified by flash chromatography on silica gel using PE/EA (5: 1) as the eluent to afford the corresponding **2kc**.

### (*aS, S*)-1-(4-bromo-3,3-dimethyl-1-oxido-1-phenyl-3H-1H6-isothiazol-5-yl)naphthalen-2-yl diphenylphosphinate (**2kc**)

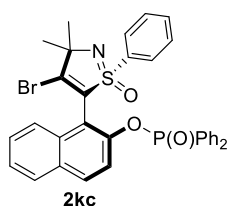

**Appearance:** white solid.

**Yield:** 70%, 42.8 mg. **ee** = 99%.

**<sup>1</sup>H NMR** (400 MHz, CDCl<sub>3</sub>) δ 8.28 (dd, *J* = 12.6, 7.2 Hz, 2H), 8.12 (dd, *J* = 13.0, 7.4 Hz, 2H), 7.83 (d, *J* = 9.1 Hz, 1H), 7.67 (td, *J* = 15.9, 15.0, 8.6 Hz, 4H), 7.50 (dq, *J* = 14.5, 7.8 Hz, 6H), 7.41 (t, *J* = 7.4 Hz, 1H), 7.30 – 7.20 (m, 2H), 7.16 (t, *J* = 7.6 Hz, 1H), 6.86 (t, *J* = 7.7 Hz, 1H), 6.53 (d, *J* = 8.5 Hz, 1H), 1.78 (s, 3H), 1.51 (s, 3H).

**<sup>13</sup>C NMR** (100 MHz, CDCl<sub>3</sub>) δ 154.28, 149.07, 138.95, 133.39, 132.58, 132.48, 131.88, 131.77, 131.67, 131.16, 129.71, 129.54, 128.85, 128.67, 128.60, 128.46, 127.98, 126.52, 124.72, 123.03, 119.04, 77.00, 75.32, 30.12, 29.14.

**HRMS (ESI)** *m/z* Calcd for [C<sub>33</sub>H<sub>27</sub>BrNNaO<sub>3</sub>PS, M + Na]<sup>+</sup>: 650.0525, Found: 650.0529.

**Optical Rotation:** [α]<sub>D</sub><sup>25</sup> = -120.5° (*c* = 1.0, DCM).

**HPLC analysis:** Chiralcel OD-H (Hexane/*i*-PrOH = 85:15, flow rate = 1.0 mL/min, wave length = 254 nm), *t<sub>R</sub>* = 9.283 min (minor), *t<sub>R</sub>* = 10.790 min (major).

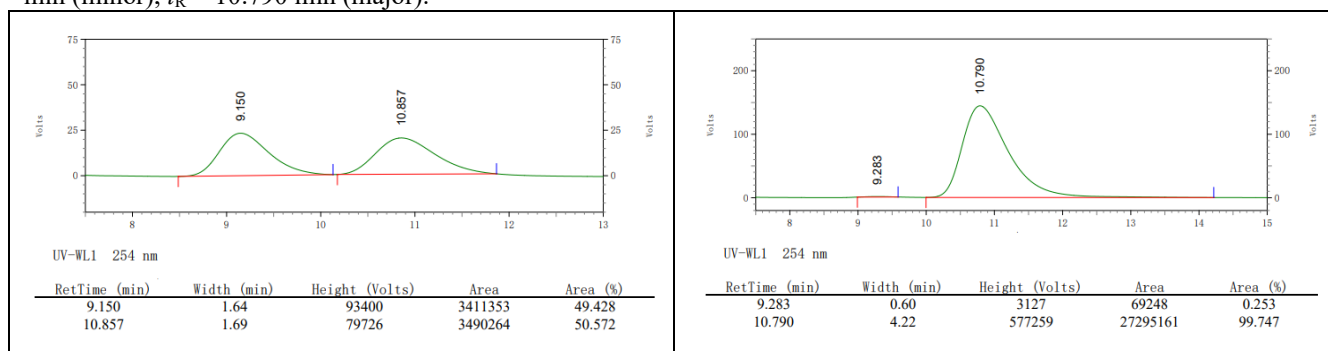

## General procedure for the asymmetric synthesis of compounds (*R*)-4a-4p

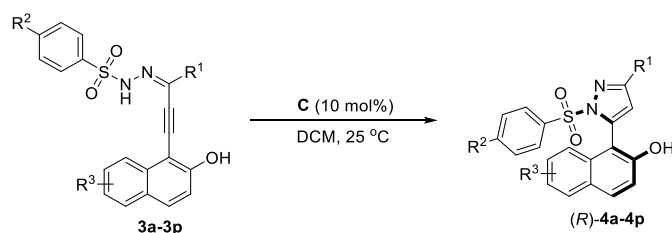

A flame-dried Schlenk tube equipped with a magnetic stirring bar, was charged with **3a-3p** (0.1 mmol, 1 equiv), and catalyst **C** (10 mol%), DCM (4.0 mL) was injected into the tube at 25 °C. After stirring for 12 h, the mixture was filtered and purified by silica gel chromatography (PE/EA = 4:1) to afford the product **(*R*)-4a-4p**. Racemic samples were prepared without the addition of the catalyst.

## Analytical dates of (*S*)-1a-1t and (*R*)-4a-4p

### (*R*)-1-(3-(*tert*-butyl)-1-tosyl-1*H*-pyrazol-5-yl) naphthalen-2-ol (**4a**)

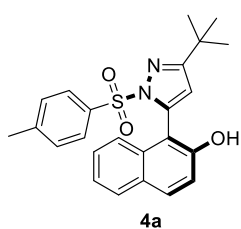

**Appearance:** white solid.

**Yield:** 83%, 34.8 mg. **ee** = 91%.

**<sup>1</sup>H NMR** (400 MHz, CDCl<sub>3</sub>) δ 7.84 (d, *J* = 8.8 Hz, 1H), 7.76 (d, *J* = 8.0 Hz, 1H), 7.43 (d, *J* = 7.9 Hz, 2H), 7.26 (dd, *J* = 20.0, 8.1 Hz, 2H), 7.15 (t, *J* = 7.4 Hz, 1H), 7.00 (d, *J* = 7.8 Hz, 2H), 6.86 (d, *J* = 8.3 Hz, 1H), 6.37 (s, 1H), 5.63 (s, 1H), 2.30 (s, 3H), 1.37 (s, 9H).

**<sup>13</sup>C NMR** (100 MHz, CDCl<sub>3</sub>) δ 166.39, 152.37, 145.05, 139.74, 134.07, 133.52, 131.59, 129.24, 128.41, 128.10, 127.92, 126.68, 123.85, 123.33, 117.77, 111.23, 109.64, 32.80, 29.92, 21.52.

**HRMS (ESI)** *m/z* Calcd for [C<sub>24</sub>H<sub>24</sub>N<sub>2</sub>NaO<sub>3</sub>S, M + Na]<sup>+</sup>: 443.1322, Found: 443.1325.

**Optical Rotation:** [α]<sub>D</sub><sup>25</sup> = 49° (*c* = 1.0, DCM).

**HPLC analysis:** Chiralcel IB-H (Hexane/*i*-PrOH = 80:20, flow rate = 1.0 mL/min, wave length = 254 nm), *t*<sub>R</sub> = 8.608 min (major), *t*<sub>R</sub> = 18.714 min (minor).

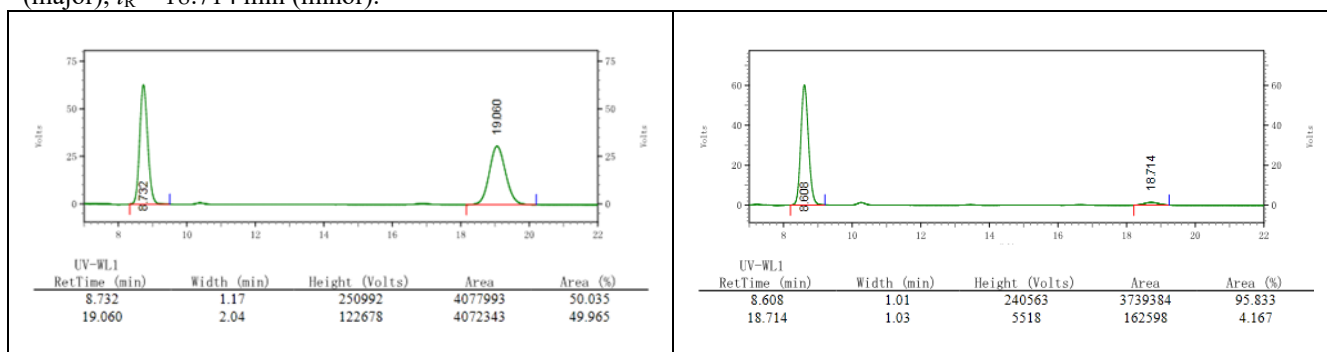

**(R)-1-(3-methyl-1-tosyl-1H-pyrazol-5-yl) naphthalen-2-ol (4b)**

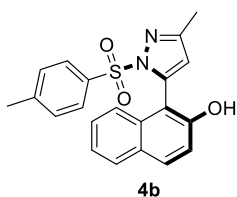

4b

**Appearance:** white solid.

**Yield:** 72%, 27.2 mg. **ee** = 88%.

**<sup>1</sup>H NMR** (400 MHz, CDCl<sub>3</sub>) δ 7.82 (d, *J* = 8.8 Hz, 1H), 7.71 (d, *J* = 8.0 Hz, 1H), 7.33 (d, *J* = 7.8 Hz, 2H), 7.21 (p, *J* = 9.6, 8.4 Hz, 3H), 7.08 (t, *J* = 7.4 Hz, 1H), 6.93 (d, *J* = 7.7 Hz, 2H), 6.80 (d, *J* = 8.3 Hz, 1H), 6.23 (s, 1H), 2.36 (s, 3H), 2.24 (s, 3H).

**<sup>13</sup>C NMR** (100 MHz, CDCl<sub>3</sub>) δ 153.63, 152.41, 145.31, 139.64, 133.92, 133.54, 131.81, 129.42,

128.46, 128.18, 127.94, 126.76, 123.93, 123.46, 117.83, 114.30, 109.39, 21.57, 14.09.

**HRMS (ESI)** *m/z* Calcd for [C<sub>21</sub>H<sub>18</sub>N<sub>2</sub>NaO<sub>3</sub>S, M + Na]<sup>+</sup>: 401.0852, Found: 401.0857.

**Optical Rotation:** [α]<sub>D</sub><sup>25</sup> = 55° (*c* = 1.0, DCM).

**HPLC analysis:** Chiralcel OD-H (Hexane/*i*-PrOH = 85:15, flow rate = 1.0 mL/min, wave length = 254 nm), *t*<sub>R</sub> = 9.094 min (minor), *t*<sub>R</sub> = 11.054 min (major).

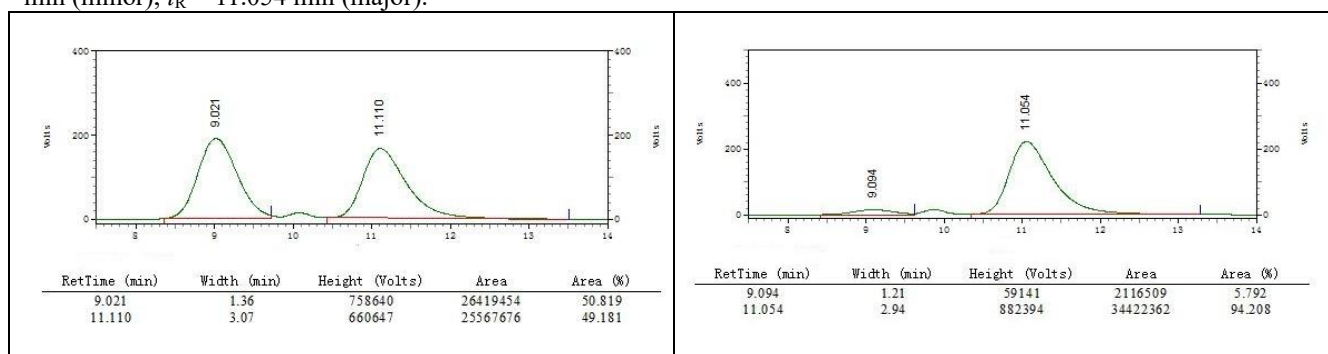

**(R)-1-(3-ethyl-1-tosyl-1H-pyrazol-5-yl) naphthalen-2-ol (4c)**

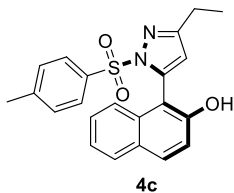

4c

**Appearance:** white solid.

**Yield:** 75%, 29.4 mg. **ee** = 99%.

**<sup>1</sup>H NMR** (400 MHz, CDCl<sub>3</sub>) δ 7.81 (d, *J* = 8.9 Hz, 1H), 7.70 (d, *J* = 8.1 Hz, 1H), 7.32 (d, *J* = 8.0 Hz, 2H), 7.20 (q, *J* = 12.1, 9.8 Hz, 3H), 7.06 (t, *J* = 7.6 Hz, 1H), 6.92 (d, *J* = 8.0 Hz, 2H), 6.77 (d, *J* = 8.4 Hz, 1H), 6.26 (s, 1H), 5.16 (s, 1H), 2.73 (q, *J* = 7.6 Hz, 2H), 2.23 (s, 3H), 1.25 (t, *J* = 7.6

Hz, 3H).

**<sup>13</sup>C NMR** (100 MHz, CDCl<sub>3</sub>) δ 159.25, 152.40, 145.27, 139.57, 133.93, 133.55, 131.79, 129.39, 128.47, 128.17, 127.94, 126.75, 123.92, 123.45, 117.84, 112.90, 109.51, 21.83, 21.56, 13.10.

**HRMS (ESI)** *m/z* Calcd for [C<sub>22</sub>H<sub>20</sub>N<sub>2</sub>NaO<sub>3</sub>S, M + Na]<sup>+</sup>: 415.1009, Found: 415.1003.

**Optical Rotation:** [α]<sub>D</sub><sup>25</sup> = 33° (*c* = 1.0, DCM).

**HPLC analysis:** Chiralcel OD-H (Hexane/*i*-PrOH = 85:15, flow rate = 1.0 mL/min, wave length = 254 nm), *t*<sub>R</sub> = 6.375 min (major), *t*<sub>R</sub> = 7.061 min (minor).

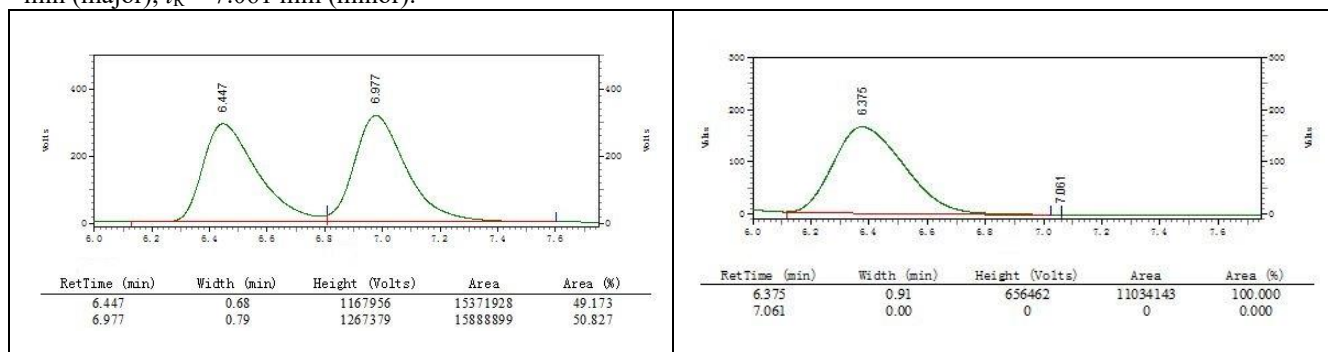

**(R)-1-(3-ethyl-1-tosyl-1H-pyrazol-5-yl) naphthalen-2-ol (4d)**

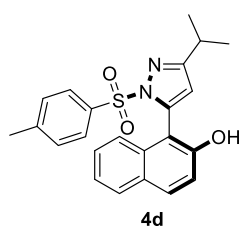

**Appearance:** white solid.

**Yield:** 77%, 31.2 mg. **ee** = 89%.

**<sup>1</sup>H NMR** (400 MHz, CDCl<sub>3</sub>) δ 7.79 (d, *J* = 8.9 Hz, 1H), 7.69 (d, *J* = 8.1 Hz, 1H), 7.32 (d, *J* = 8.0 Hz, 2H), 7.25 – 7.14 (m, 2H), 7.06 (t, *J* = 7.6 Hz, 1H), 6.91 (d, *J* = 7.9 Hz, 2H), 6.75 (d, *J* = 8.4 Hz, 1H), 6.27 (s, 1H), 3.07 (dt, *J* = 13.9, 6.9 Hz, 1H), 2.22 (s, 3H), 1.25 (d, *J* = 6.9 Hz, 6H).

**<sup>13</sup>C NMR** (100 MHz, CDCl<sub>3</sub>) δ 163.56, 152.39, 145.19, 139.58, 133.94, 133.53, 131.74, 129.33,

128.45, 128.13, 127.93, 126.73, 123.86, 123.40, 117.83, 111.55, 109.58, 28.23, 22.23, 21.55.

**HRMS (ESI)** *m/z* Calcd for [C<sub>23</sub>H<sub>22</sub>N<sub>2</sub>NaO<sub>3</sub>S, M + Na]<sup>+</sup>: 429.1165, Found: 429.1168.

**Optical Rotation:** [α]<sub>D</sub><sup>25</sup> = 32° (*c* = 1.0, DCM).

**HPLC analysis:** Chiralcel OD-H (Hexane/*i*-PrOH = 90:10, flow rate = 1.0 mL/min, wave length = 254 nm), *t*<sub>R</sub> = 8.362 min (minor), *t*<sub>R</sub> = 14.429 min (major).

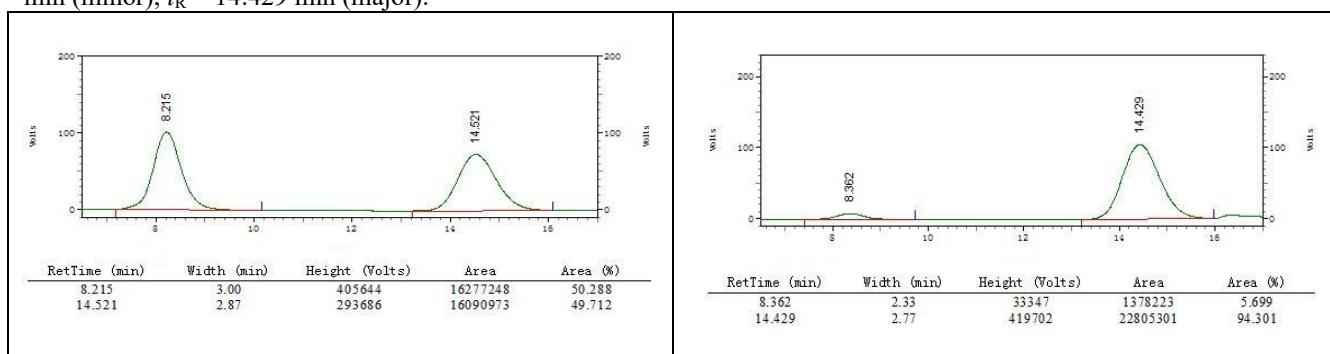

**(R)-1-(3-(pentan-3-yl)-1-tosyl-1H-pyrazol-5-yl) naphthalen-2-ol (4e)**

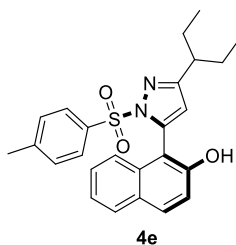

**Appearance:** white solid.

**Yield:** 80%, 34.7 mg. **ee** = 93%.

**<sup>1</sup>H NMR** (400 MHz, CDCl<sub>3</sub>) δ 7.87 (d, *J* = 8.4 Hz, 1H), 7.77 (d, *J* = 7.4 Hz, 1H), 7.37 (d, *J* = 7.2 Hz, 2H), 7.30 (s, 1H), 7.17 – 7.08 (m, 1H), 6.97 (d, *J* = 7.1 Hz, 2H), 6.80 (d, *J* = 7.6 Hz, 1H), 6.30 (s, 1H), 5.43 (s, 1H), 2.74 (s, 1H), 2.29 (s, 3H), 1.81 – 1.67 (m, 2H), 1.65 – 1.50 (m, 2H), 0.84 (s, 6H).

**<sup>13</sup>C NMR** (100 MHz, a CDCl<sub>3</sub>) δ 161.82, 152.27, 145.16, 139.92, 133.86, 133.42, 131.77,

129.29, 128.45, 127.94, 126.78, 123.67, 123.39, 117.81, 112.15, 109.97, 109.53, 42.54, 27.62, 21.54, 11.92.

**HRMS (ESI)** *m/z* Calcd for [C<sub>25</sub>H<sub>26</sub>N<sub>2</sub>NaO<sub>3</sub>S, M + Na]<sup>+</sup>: 457.1556, Found: 457.1550.

**Optical Rotation:** [α]<sub>D</sub><sup>25</sup> = 40° (*c* = 1.0, DCM).

**HPLC analysis:** Chiralcel AD-H (Hexane/*i*-PrOH = 90:10, flow rate = 1.0 mL/min, wave length = 254 nm), *t*<sub>R</sub> = 5.477 min (minor), *t*<sub>R</sub> = 7.242 min (major).

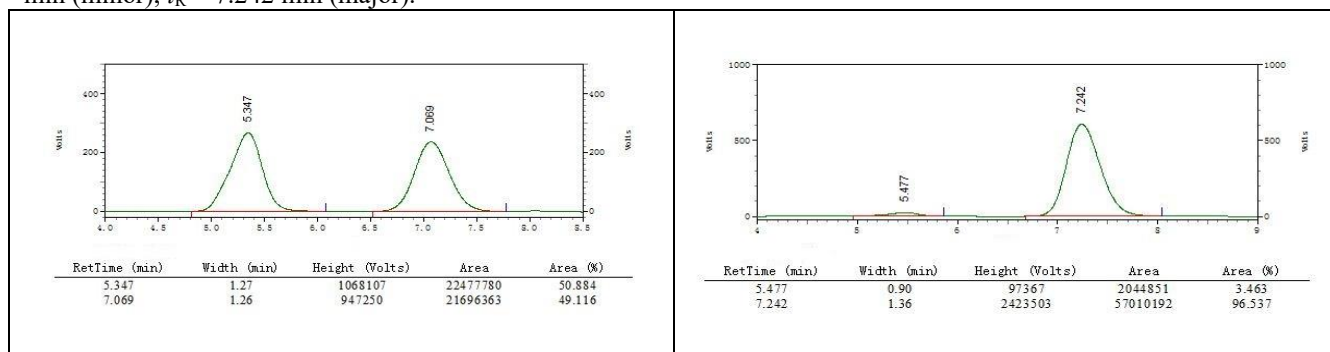

**(R)-1-(3-cyclopentyl-1-tosyl-1H-pyrazol-5-yl) naphthalen-2-ol (4f)**

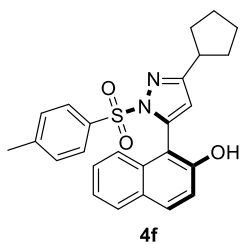

**Appearance:** white solid.

**Yield:** 84%, 36.3 mg. **ee** = 95%.

**<sup>1</sup>H NMR** (400 MHz, CDCl<sub>3</sub>) δ 7.79 (d, *J* = 8.9 Hz, 1H), 7.69 (d, *J* = 8.1 Hz, 1H), 7.32 (d, *J* = 7.9 Hz, 2H), 7.26 – 7.13 (m, 2H), 7.06 (t, *J* = 7.7 Hz, 1H), 6.91 (d, *J* = 8.0 Hz, 2H), 6.76 (d, *J* = 8.5 Hz, 1H), 6.25 (s, 1H), 5.42 (s, 1H), 3.17 (dd, *J* = 10.3, 5.5 Hz, 1H), 2.23 (s, 3H), 2.11 – 1.98 (m, 2H), 1.76 – 1.53 (m, 7H).

**<sup>13</sup>C NMR** (100 MHz, CDCl<sub>3</sub>) δ 162.18, 152.33, 145.19, 139.54, 133.86, 133.49, 131.74, 129.33,

128.41, 128.11, 127.91, 126.72, 123.86, 123.40, 117.79, 112.07, 39.08, 33.02, 25.45, 21.56.

**HRMS (ESI)** *m/z* Calcd for [C<sub>25</sub>H<sub>24</sub>N<sub>2</sub>NaO<sub>3</sub>S, M + Na]<sup>+</sup>: 455.1400, Found: 455.1405.

**Optical Rotation:** [α]<sub>D</sub><sup>25</sup> = 25° (*c* = 1.0, acetone).

**HPLC analysis:** Chiralcel OD-H (Hexane/*i*-PrOH = 90:10, flow rate = 1.0 mL/min, wave length = 254 nm), *t<sub>R</sub>* = 8.172 min (minor), *t<sub>R</sub>* = 11.167 min (major).

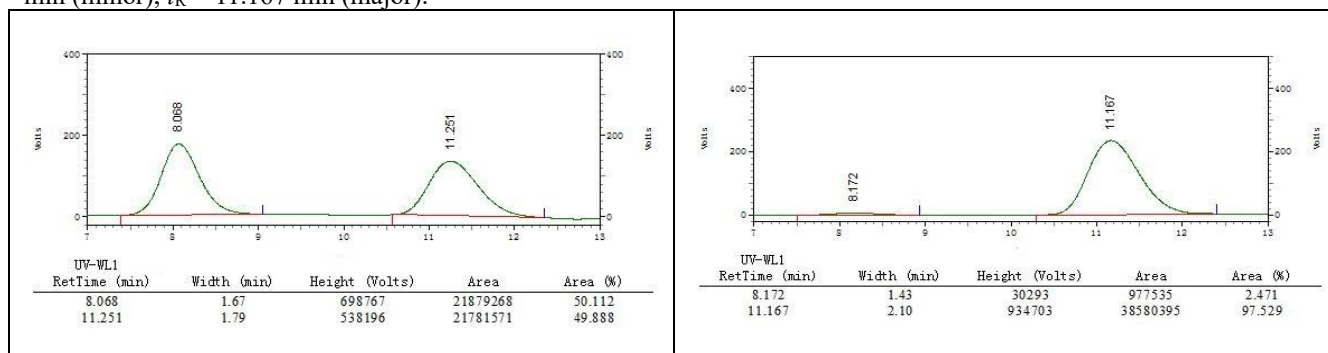

**(R)-1-(3-cyclohexyl-1-tosyl-1H-pyrazol-5-yl) naphthalen-2-ol (4g)**

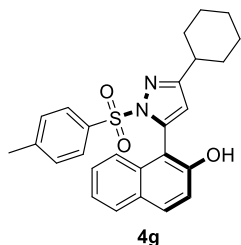

**Appearance:** yellow solid.

**Yield:** 82%, 36.5 mg. **ee** = 96%.

**<sup>1</sup>H NMR** (400 MHz, CDCl<sub>3</sub>) δ 7.86 (d, *J* = 8.9 Hz, 1H), 7.76 (d, *J* = 8.1 Hz, 1H), 7.38 (d, *J* = 8.1 Hz, 2H), 7.32 – 7.22 (m, 2H), 7.12 (t, *J* = 7.6 Hz, 1H), 6.98 (d, *J* = 8.0 Hz, 2H), 6.81 (d, *J* = 8.4 Hz, 1H), 6.32 (s, 1H), 5.29 (s, 1H), 2.90 – 2.77 (m, 1H), 2.29 (s, 3H), 2.05 (d, *J* = 11.4 Hz, 2H), 1.82 (d, *J* = 12.0 Hz, 2H), 1.73 (d, *J* = 12.7 Hz, 1H), 1.43 (dq, *J* = 31.2, 11.4, 10.6 Hz, 4H), 1.30 (s, 1H).

**<sup>13</sup>C NMR** (100 MHz, CDCl<sub>3</sub>) δ 162.68, 152.31, 145.18, 139.28, 133.89, 133.50, 131.75, 129.33, 128.45, 128.09, 127.92, 126.73, 123.86, 123.41, 117.79, 111.85, 109.57, 37.72, 32.55, 32.49, 26.07, 25.90, 21.56.

**HRMS (ESI)** *m/z* Calcd for [C<sub>26</sub>H<sub>26</sub>N<sub>2</sub>NaO<sub>3</sub>S, M + Na]<sup>+</sup>: 469.1556, Found: 469.1551.

**Optical Rotation:** [α]<sub>D</sub><sup>25</sup> = 26° (*c* = 1.0, DCM).

**HPLC analysis:** Chiralcel OD-H (Hexane/*i*-PrOH = 90:10, flow rate = 1.0 mL/min, wave length = 254 nm), *t<sub>R</sub>* = 11.179 min (minor), *t<sub>R</sub>* = 17.919 min (major).

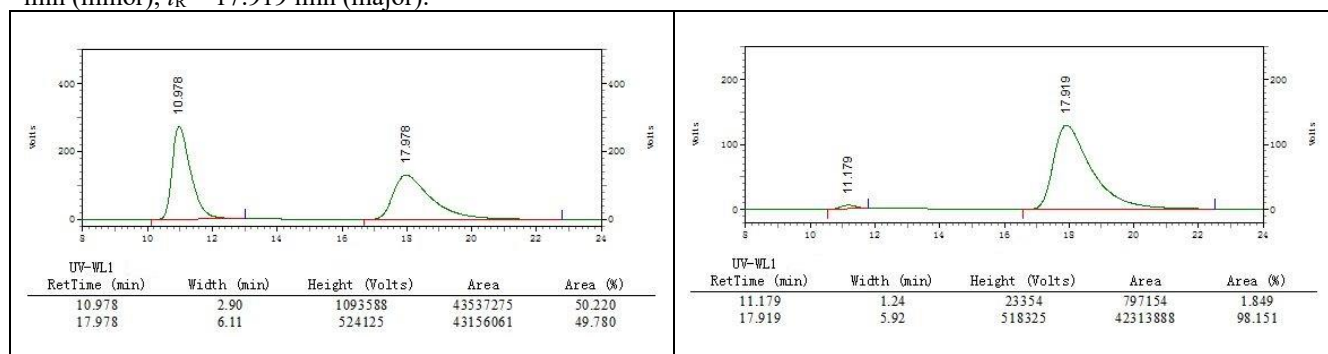

**(R)-1-(3-((3R,5R,7R)-adamantan-1-yl)-1H-pyrazol-5-yl) naphthalen-2-ol (4h)**

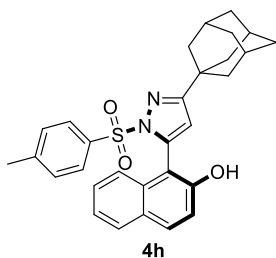

**Appearance:** white solid.

**Yield:** 80%, 39.8 mg. **ee** = 96%.

**<sup>1</sup>H NMR** (400 MHz, CDCl<sub>3</sub>) δ 7.85 (d, *J* = 8.9 Hz, 1H), 7.76 (d, *J* = 8.0 Hz, 1H), 7.40 (d, *J* = 8.2 Hz, 2H), 7.33 – 7.20 (m, 2H), 7.18 – 7.10 (m, 1H), 6.99 (d, *J* = 8.1 Hz, 2H), 6.82 (d, *J* = 8.4 Hz, 1H), 6.36 (s, 1H), 5.39 (s, 1H), 2.30 (s, 3H), 2.09 (m, 3H), 2.02 (m, 6H), 1.78 (m, 6H).

**<sup>13</sup>C NMR** (100 MHz, CDCl<sub>3</sub>) δ 166.42, 152.25, 145.04, 139.33, 133.97, 133.48, 131.62, 129.25, 128.41, 128.04, 127.90, 126.67, 123.88, 123.35, 117.73, 110.87, 109.67, 41.84, 36.59, 34.69, 28.36, 21.55.

**HRMS (ESI)** *m/z* Calcd for [C<sub>30</sub>H<sub>30</sub>N<sub>2</sub>NaO<sub>3</sub>S, M + Na]<sup>+</sup>: 521.1869, Found: 521.1860.

**Optical Rotation:** [α]<sub>D</sub><sup>25</sup> = 32° (*c* = 1.0, DCM).

**HPLC analysis:** Chiralcel OD-H (Hexane/*i*-PrOH = 90:10, flow rate = 1.0 mL/min, wave length = 254 nm), *t*<sub>R</sub> = 10.483 min (minor), *t*<sub>R</sub> = 20.308 min (major).

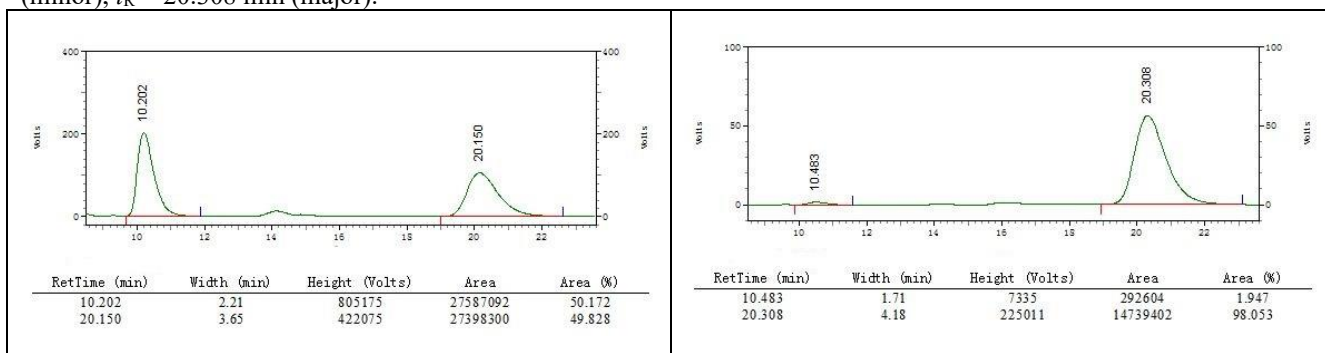

**(R)-1-(3-phenyl-1-tosyl-1H-pyrazol-5-yl) naphthalen-2-ol (4i)**

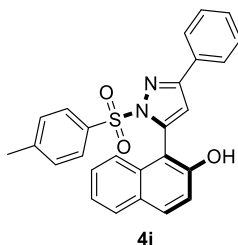

**Appearance:** white solid.

**Yield:** 83%, 37.4mg. **ee** = 83%.

**<sup>1</sup>H NMR** (400 MHz, acetone-*d*<sub>6</sub>) δ 8.94 (s, 1H), 8.02 – 7.92 (m, 3H), 7.87 (d, *J* = 7.5 Hz, 1H), 7.68 (d, *J* = 8.2 Hz, 2H), 7.44 (dt, *J* = 23.8, 7.2 Hz, 3H), 7.36 – 7.23 (m, 5H), 7.15 (d, *J* = 8.0 Hz, 1H), 6.96 (s, 1H), 2.35 (s, 3H).

**<sup>13</sup>C NMR** (100 MHz, acetone-*d*<sub>6</sub>) δ 155.26, 154.80, 146.39, 143.44, 135.90, 135.09, 132.78, 132.05, 130.38, 129.91, 129.64, 129.16, 129.06, 128.84, 127.59, 126.92, 124.69, 123.82, 118.74, 110.82, 110.45, 21.53.

**HRMS (ESI)** *m/z* Calcd for [C<sub>26</sub>H<sub>20</sub>N<sub>2</sub>NaO<sub>3</sub>S, M + Na]<sup>+</sup>: 463.1087, Found: 463.1084.

**Optical Rotation:** [α]<sub>D</sub><sup>25</sup> = 26° (*c* = 1.0, DCM).

**HPLC analysis:** Chiralcel IB-H (Hexane/*i*-PrOH = 70:30, flow rate = 1.0 mL/min, wave length = 254 nm), *t*<sub>R</sub> = 6.626 min (minor), *t*<sub>R</sub> = 8.053 min (major).

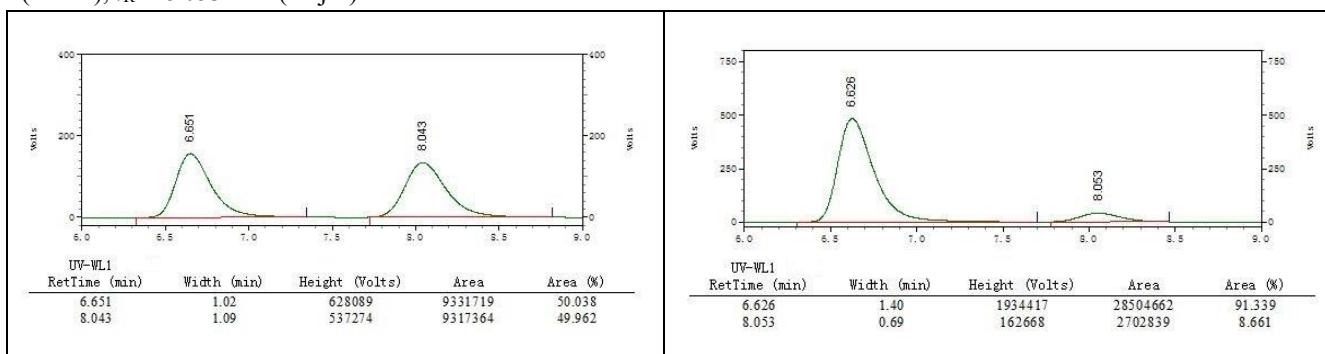

**(R)-1-(3-(tert-butyl)-1-(phenylsulfonyl)-1H-pyrazol-5-yl) naphthalen-2-ol (4j)**

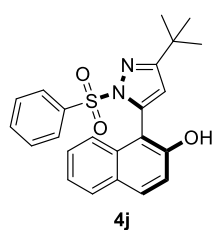

**Appearance:** white solid.

**Yield:** 81%, 32.9 mg. ee = 91%.

**<sup>1</sup>H NMR** (400 MHz, CDCl<sub>3</sub>) δ 7.75 (d, *J* = 8.5 Hz, 1H), 7.67 (d, *J* = 7.5 Hz, 1H), 7.48 (d, *J* = 7.0 Hz, 2H), 7.40 – 7.31 (m, 1H), 7.27 – 7.10 (m, 4H), 7.07 (d, *J* = 7.2 Hz, 1H), 6.79 (d, *J* = 7.8 Hz, 1H), 6.29 (s, 1H), 1.28 (s, 9H).

**<sup>13</sup>C NMR** (100 MHz, CDCl<sub>3</sub>) δ 166.67, 152.52, 140.26, 137.08, 133.85, 133.49, 131.60, 128.61, 128.34, 128.02, 127.95, 126.77, 123.72, 123.36, 117.79, 111.28, 109.53, 32.80, 29.88.

**HRMS (ESI)** *m/z* Calcd for [C<sub>23</sub>H<sub>22</sub>N<sub>2</sub>NaO<sub>3</sub>S, M + Na]<sup>+</sup>: 429.1243, Found: 429.1238.

**Optical Rotation:** [α]<sub>D</sub><sup>25</sup> = 31° (*c* = 1.0, DCM).

**HPLC analysis:** Chiralcel OD-H (Hexane/*i*-PrOH = 90:10, flow rate = 1.0 mL/min, wave length = 254 nm), *t*<sub>R</sub> = 9.923 min (minor), *t*<sub>R</sub> = 12.674 min (major).

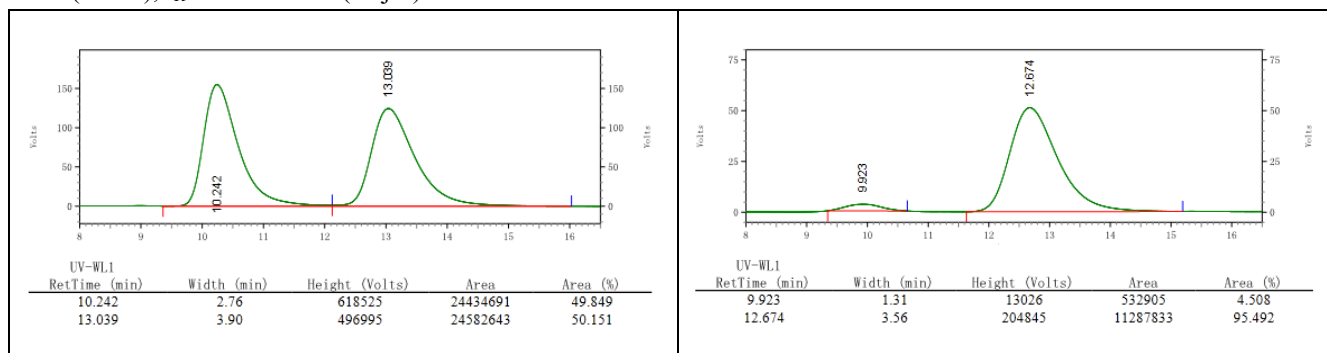

**(R)-1-(1-(phenylsulfonyl)-3-(p-tolyl)-1H-pyrazol-5-yl) naphthalen-2-ol (4k)**

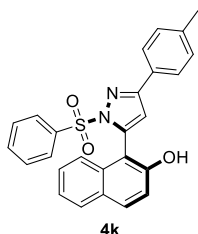

**Appearance:** white solid.

**Yield:** 81%, 35.7 mg. ee = 84%.

**<sup>1</sup>H NMR** (400 MHz, acetone-*d*<sub>6</sub>) δ 8.99 (s, 1H), 7.95 (d, *J* = 8.9 Hz, 1H), 7.86 (dt, *J* = 8.1, 2.4 Hz, 3H), 7.82 (d, *J* = 8.1 Hz, 2H), 7.65 (t, *J* = 7.4 Hz, 1H), 7.48 (t, *J* = 7.4 Hz, 2H), 7.37 – 7.25 (m, 5H), 7.17 (d, *J* = 8.0 Hz, 1H), 6.94 (s, 1H), 2.36 (s, 3H).

**<sup>13</sup>C NMR** (100 MHz, acetone-*d*<sub>6</sub>) 155.58, 154.76, 143.57, 139.88, 138.89, 135.10, 132.05, 130.25, 129.93, 129.86, 129.06, 128.85, 127.63, 126.91, 124.66, 123.86, 118.71, 110.87, 110.45, 29.85, 21.32.

**HRMS (ESI)** *m/z* Calcd for [C<sub>26</sub>H<sub>20</sub>N<sub>2</sub>NaO<sub>3</sub>S, M + Na]<sup>+</sup>: 463.1087, Found: 463.1080.

**Optical Rotation:** [α]<sub>D</sub><sup>25</sup> = 27° (*c* = 1.0, DCM).

**HPLC analysis:** Chiralcel IB-H (Hexane/*i*-PrOH = 90:10, flow rate = 1.0 mL/min, wave length = 254 nm), *t*<sub>R</sub> = 26.136 min (major), *t*<sub>R</sub> = 32.041 min (minor).

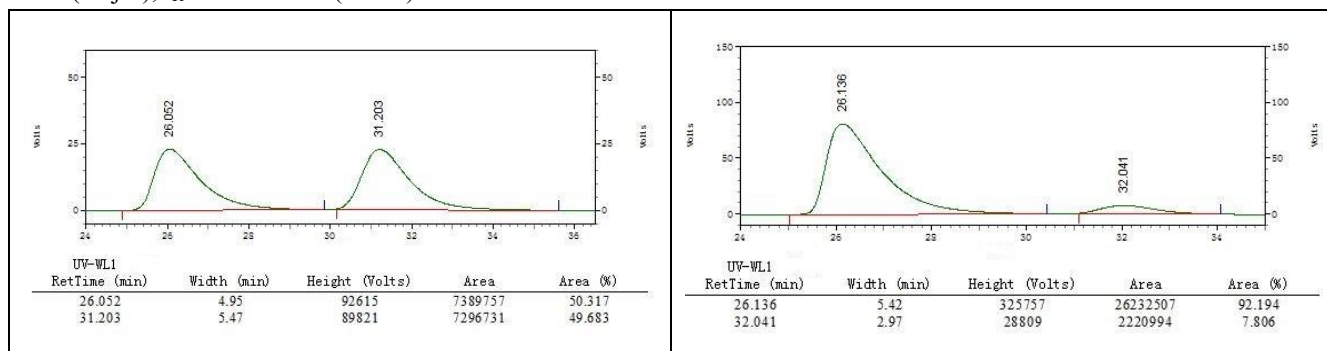

**(R)-1-(1-(mesitylsulfonyl)-3-(p-tolyl)-1H-pyrazol-5-yl) naphthalen-2-ol (4l)**

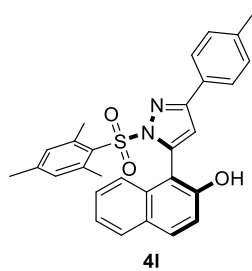

4l

**Appearance:** white solid.

**Yield:** 84%, 40.8 mg. ee = 94%.

**<sup>1</sup>H NMR** (400 MHz, acetone-*d*<sub>6</sub>) δ 8.90 (s, 1H), 7.91 – 7.83 (m, 3H), 7.78 (d, *J* = 8.0 Hz, 1H), 7.28 (d, *J* = 7.8 Hz, 2H), 7.24 (d, *J* = 6.8 Hz, 1H), 7.21 (s, 1H), 7.18 (d, *J* = 6.9 Hz, 1H), 7.12 (d, *J* = 8.3 Hz, 1H), 6.91 (s, 1H), 6.74 (s, 2H), 2.36 (s, 3H), 2.26 (s, 6H), 2.16 (s, 3H).

**<sup>13</sup>C NMR** (100 MHz, acetone-*d*<sub>6</sub>) 155.00, 153.29, 145.04, 142.14, 141.69, 139.47, 134.83, 133.07, 132.51, 132.18, 130.20, 128.85, 128.53, 127.44, 126.74, 124.63, 123.55, 118.63, 110.39,

109.49, 22.62, 21.31, 20.97.

**HRMS (ESI)** *m/z* Calcd for [C<sub>29</sub>H<sub>26</sub>N<sub>2</sub>NaO<sub>3</sub>S, M + Na]<sup>+</sup>: 505.1556, Found: 505.1559.

**Optical Rotation:** [α]<sub>D</sub><sup>25</sup> = 29° (*c* = 1.0, DCM).

**HPLC analysis:** Chiralcel OD-H (Hexane/*i*-PrOH = 90:10, flow rate = 1.0 mL/min, wave length = 254 nm), *t*<sub>R</sub> = 7.874 min (major), *t*<sub>R</sub> = 13.292 min (minor).

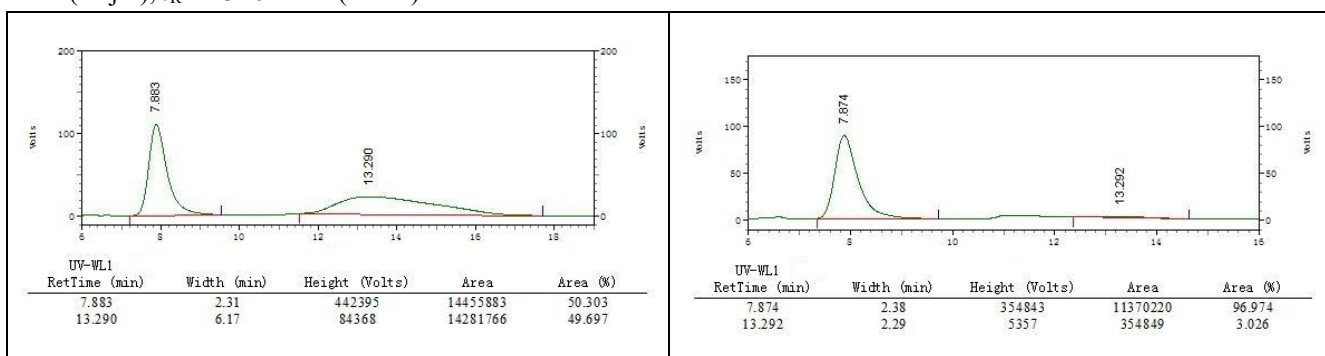

**(R)-1-(3-(tert-butyl)-1-((4-(trifluoromethyl) phenyl) sulfonyl)-1H-pyrazol-5-yl) naphthalen-2-ol (4m)**

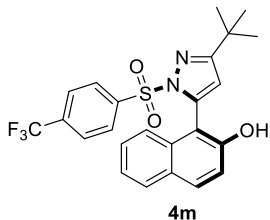

4m

**Appearance:** white solid.

**Yield:** 80%, 37.9 mg. ee = 89%.

**<sup>1</sup>H NMR** (400 MHz, CDCl<sub>3</sub>) δ 7.79 (d, *J* = 8.9 Hz, 1H), 7.69 (d, *J* = 8.1 Hz, 1H), 7.57 (d, *J* = 8.1 Hz, 2H), 7.39 (d, *J* = 8.2 Hz, 2H), 7.24 – 7.13 (m, 2H), 7.03 (t, *J* = 7.6 Hz, 1H), 6.65 (d, *J* = 8.4 Hz, 1H), 6.35 (s, 1H), 1.31 (s, 9H).

**<sup>13</sup>C NMR** (100 MHz, CDCl<sub>3</sub>) δ 167.15, 152.55, 140.42, 140.20, 135.32 (q, *J* = 32.6 Hz), 133.33, 131.92, 128.62, 128.39, 128.11, 126.99, 125.75 (q, *J* = 3.0 Hz) 123.61, 123.26, 122.88 (q, *J* = 272.0 Hz), 117.80, 111.78, 109.04, 32.93, 29.87, 29.68.

**HRMS (ESI)** *m/z* Calcd for [C<sub>24</sub>H<sub>21</sub>F<sub>3</sub>N<sub>2</sub>NaO<sub>3</sub>S, M + Na]<sup>+</sup>: 497.1117, Found: 497.1110.

**Optical Rotation:** [α]<sub>D</sub><sup>25</sup> = 34° (*c* = 1.0, DCM).

**HPLC analysis:** Chiralcel OD-H (Hexane/*i*-PrOH = 85:15, flow rate = 1.0 mL/min, wave length = 254 nm), *t*<sub>R</sub> = 7.457 min (major), *t*<sub>R</sub> = 12.811 min (minor).

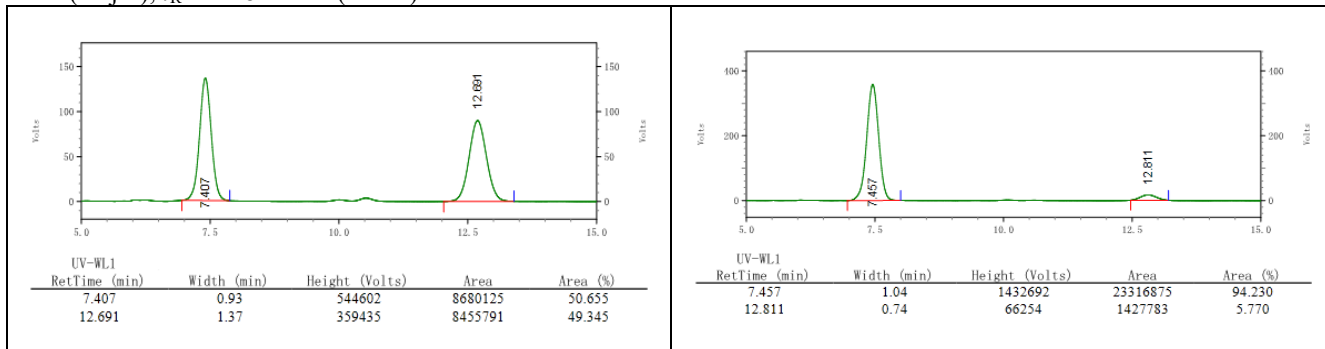



**(R)-1-(3-(tert-butyl)-1-((4-chlorophenyl) sulfonyl)-1H-pyrazol-5-yl) naphthalen-2-ol (4n)**

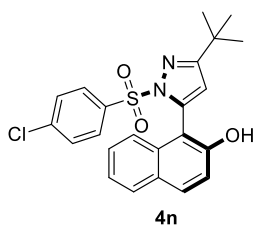

4n

**Appearance:** white solid.

**Yield:** 77%, 33.9 mg. **ee** = 94%.

**<sup>1</sup>H NMR** (400 MHz, CDCl<sub>3</sub>) δ 7.87 (d, *J* = 8.9 Hz, 1H), 7.78 (d, *J* = 8.1 Hz, 1H), 7.47 (d, *J* = 8.5 Hz, 2H), 7.31 (t, *J* = 7.4 Hz, 1H), 7.23 – 7.13 (m, 3H), 6.82 (d, *J* = 8.4 Hz, 1H), 6.41 (s, 1H), 5.39 (s, 1H), 1.38 (s, 9H).

**<sup>13</sup>C NMR** (100 MHz, CDCl<sub>3</sub>) δ 166.93, 152.29, 140.76, 139.76, 135.38, 133.37, 131.87, 129.54,

129.00, 128.46, 128.10, 126.98, 123.59, 117.71, 111.64, 109.27, 32.91, 29.91.

**HRMS (ESI)** *m/z* Calcd for [C<sub>23</sub>H<sub>21</sub>ClN<sub>2</sub>NaO<sub>3</sub>S, M + Na]<sup>+</sup>: 463.0854, Found: 463.0855.

**Optical Rotation:** [α]<sub>D</sub><sup>25</sup> = 40° (*c* = 1.0, DCM).

**HPLC analysis:** Chiralcel OD-H (Hexane/*i*-PrOH = 90:10, flow rate = 1.0 mL/min, wave length = 254 nm), *t*<sub>R</sub> = 6.713 min (minor), *t*<sub>R</sub> = 10.699 min (major).

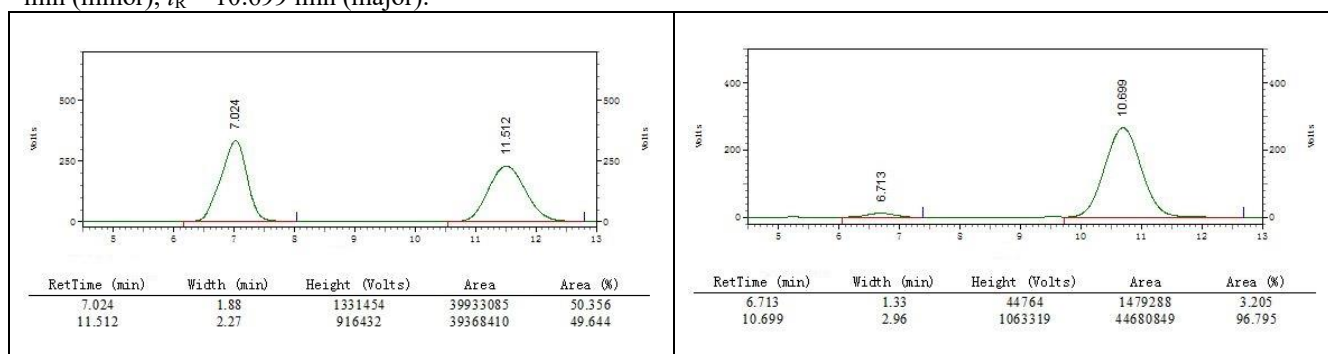

**(R)-7-bromo-1-(3-(tert-butyl)-1-((4-chlorophenyl) sulfonyl)-1H-pyrazol-5-yl) naphthalen-2-ol (4o)**

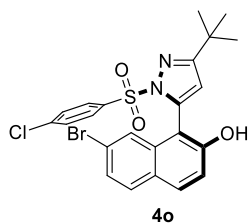

4o

**Appearance:** yellow solid.

**Yield:** 80%, 41.5 mg. **ee** = 87%.

**<sup>1</sup>H NMR** (400 MHz, CDCl<sub>3</sub>) δ 7.84 (d, *J* = 8.9 Hz, 1H), 7.64 (d, *J* = 8.6 Hz, 1H), 7.44 (d, *J* = 8.4 Hz, 2H), 7.38 (d, *J* = 8.4 Hz, 1H), 7.25 (d, *J* = 10.7 Hz, 4H), 6.76 (s, 1H), 6.42 (s, 1H), 5.42 (s, 1H), 1.40 (s, 9H).

**<sup>13</sup>C NMR** (100 MHz, CDCl<sub>3</sub>) δ 166.98, 153.28, 141.10, 138.76, 135.07, 134.48, 131.79, 129.72,

129.30, 129.20, 127.03, 126.79, 125.75, 121.67, 118.24, 111.89, 108.51, 32.95, 29.90.

**HRMS (ESI)** *m/z* Calcd for [C<sub>23</sub>H<sub>20</sub>BrClN<sub>2</sub>NaO<sub>3</sub>S, M + Na]<sup>+</sup>: 540.9959, Found: 540.9952.

**Optical Rotation:** [α]<sub>D</sub><sup>25</sup> = 26° (*c* = 1.0, DCM).

**HPLC analysis:** Chiralcel OD-H (Hexane/*i*-PrOH = 85:15, flow rate = 1.0 mL/min, wave length = 254 nm), *t*<sub>R</sub> = 4.807 min (minor), *t*<sub>R</sub> = 5.703 min (major).

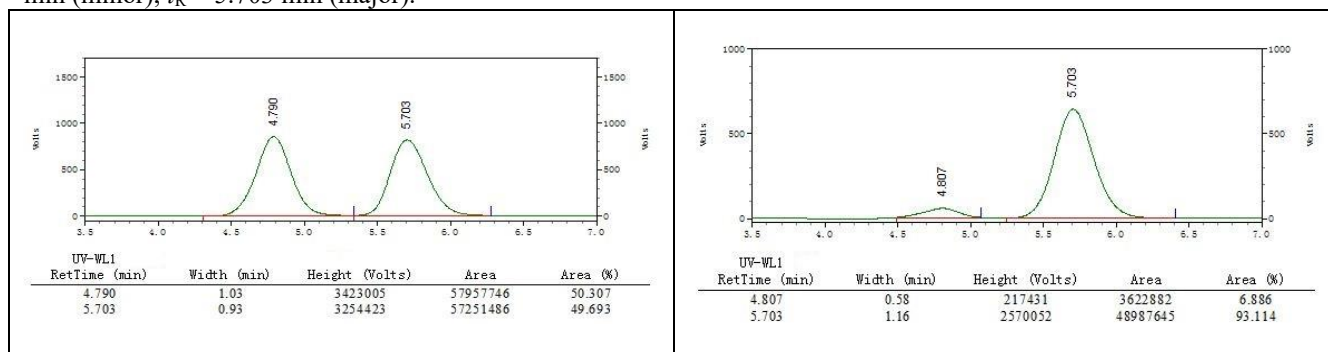

**(R)-5-(4-iodo-1,1-diphenyl-1H-benzo[c][1,2]oxasilin-3-yl) quinolin-6-ol (4p)**

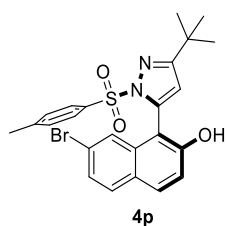

**Appearance:** white solid.

**Yield:** 83%, 41.4 mg. **ee** = 90%.

**<sup>1</sup>H NMR** (400 MHz, CDCl<sub>3</sub>) δ 7.81 (d, *J* = 8.8 Hz, 1H), 7.61 (d, *J* = 8.5 Hz, 1H), 7.33 (t, *J* = 7.0 Hz, 3H), 7.27 (d, *J* = 5.9 Hz, 1H), 7.01 (d, *J* = 7.7 Hz, 2H), 6.70 (s, 1H), 6.38 (s, 1H), 5.65 (s, 1H), 2.33 (s, 3H), 1.40 (s, 9H).

**<sup>13</sup>C NMR** (100 MHz, CDCl<sub>3</sub>) δ 166.42, 153.41, 145.46, 138.60, 134.52, 133.58, 131.60, 129.55, 129.40, 127.78, 126.66, 125.82, 121.35, 118.36, 111.61, 108.80, 32.86, 29.92, 21.68.

**HRMS (ESI)** *m/z* Calcd for [C<sub>24</sub>H<sub>23</sub>BrN<sub>2</sub>NaO<sub>3</sub>S, M + Na]<sup>+</sup>: 521.0505, Found: 521.0502.

**Optical Rotation:** [α]<sub>D</sub><sup>25</sup> = 43° (*c* = 1.0, acetone).

**HPLC analysis:** Chiralcel OD-H (Hexane/*i*-PrOH = 85:15, flow rate = 1.0 mL/min, wave length = 254 nm), *t*<sub>R</sub> = 5.151 min (minor), *t*<sub>R</sub> = 7.005 min (major).

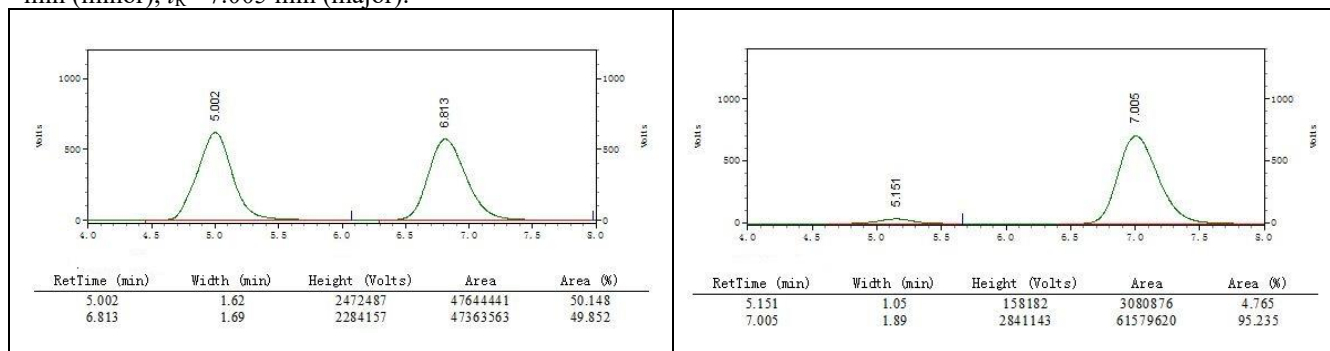

**General procedure for the asymmetric synthesis of compounds (S)-4q-4aa**

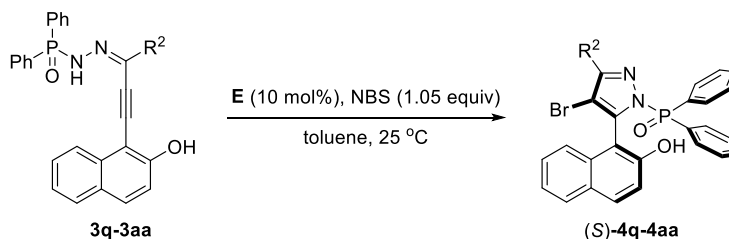

A flame-dried Schlenk tube equipped with a magnetic stirring bar, was charged with **3q-3aa** (0.1 mmol, 1.0 equiv), NBS (0.105 mmol, 1.05 equiv), and catalyst **E** (20 mol%), toluene (2.0 mL) was injected into the tube at 25 °C. After stirring for 1 h, the mixture was filtered and purified by silica gel chromatography (PE/EA = 3:1) to afford the product (*S*)-**4q-4aa**. Racemic samples were prepared without the addition of the catalyst.

## Analytical dates of (S)-4q-4aa

### (S)-(4-bromo-3-(tert-butyl)-5-(2-hydroxynaphthalen-1-yl)-1H-pyrazol-1-yl) diphenylphosphine oxide (4q)

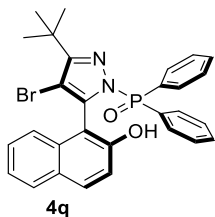

**Appearance:** white solid.

**Yield:** 74%, 40.2 mg. ee = 94%.

**<sup>1</sup>H NMR** (400 MHz, CDCl<sub>3</sub>) δ 7.83 (dd, *J* = 13.0, 8.1 Hz, 2H), 7.47 (dd, *J* = 8.1, 4.2 Hz, 3H), 7.42 – 7.32 (m, 4H), 7.14 – 7.07 (m, 2H), 6.97 (dd, *J* = 12.7, 8.2 Hz, 2H), 6.92 – 6.86 (m, 1H), 6.81 (td, *J* = 7.5, 3.8 Hz, 2H), 1.36 (s, 9H).

**<sup>13</sup>C NMR** (100 MHz, CDCl<sub>3</sub>) δ 154.26, 144.02, 143.95, 133.01, 132.90, 132.77, 132.74, 132.20, 131.93, 131.90, 131.57, 131.50, 131.46, 129.21, 128.46, 128.02, 127.88, 127.84, 127.71, 127.57, 126.54, 126.24, 124.04, 123.11, 120.48, 110.88, 109.98, 100.20, 33.81, 28.54.

**HRMS (ESI)** *m/z* Calcd for [C<sub>29</sub>H<sub>26</sub>BrN<sub>2</sub>NaO<sub>2</sub>P, M + Na]<sup>+</sup>: 567.0807, Found: 567.0802.

**Optical Rotation:** [α]<sub>D</sub><sup>25</sup> = -40.4° (*c* = 1.0, DCM).

**HPLC analysis:** Chiralcel AD-H (Hexane/*i*-PrOH = 90:10, flow rate = 1.0 mL/min, wave length = 254 nm), *t*<sub>R</sub> = 7.138 min (minor), *t*<sub>R</sub> = 12.005 min (major).

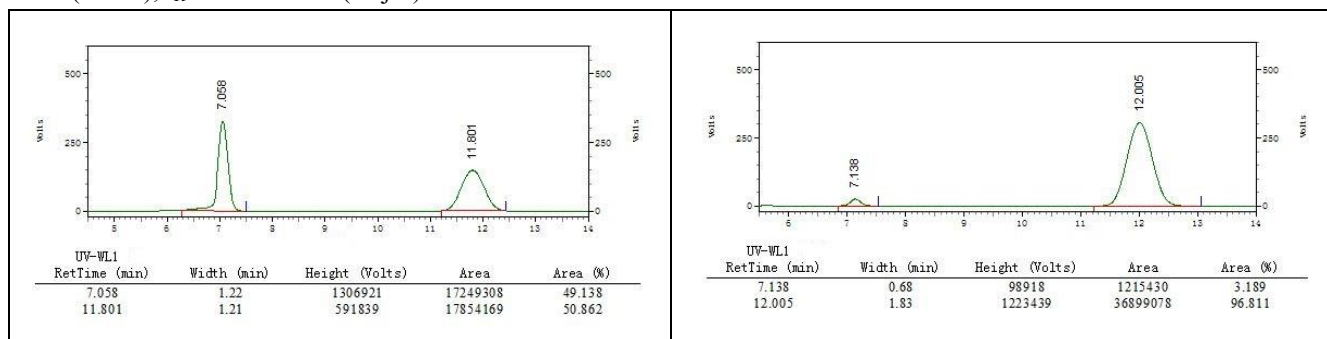

### (S)-(4-bromo-5-(2-hydroxynaphthalen-1-yl)-3-(pentan-3-yl)-1H-pyrazol-1-yl) diphenylphosphine oxide (4r)

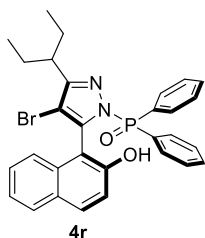

**Appearance:** white solid.

**Yield:** 72%, 40.17 mg. ee = 97%.

**<sup>1</sup>H NMR** (400 MHz, CDCl<sub>3</sub>) δ 7.80 (dd, *J* = 12.9, 7.8 Hz, 2H), 7.50 (d, *J* = 8.2 Hz, 2H), 7.37 (dd, *J* = 12.8, 7.0 Hz, 4H), 7.23 – 7.17 (m, 1H), 7.12 (s, 2H), 7.01 (s, 2H), 6.90 (d, *J* = 23.8 Hz, 3H), 2.71 (t, *J* = 6.3 Hz, 1H), 1.69 (dq, *J* = 20.7, 6.4 Hz, 4H), 0.84 (q, *J* = 7.2 Hz, 6H).

**<sup>13</sup>C NMR** (100 MHz, CDCl<sub>3</sub>) δ 158.34, 154.08, 142.57, 132.88, 132.84, 132.82, 132.78, 132.21, 132.05, 132.02, 131.57, 131.46, 128.61, 128.13, 127.99, 127.90, 127.80, 127.66, 126.33, 123.94, 123.22, 120.53, 111.01, 102.94, 41.19, 26.34, 11.89.

**HRMS (ESI)** *m/z* Calcd for [C<sub>30</sub>H<sub>28</sub>BrN<sub>2</sub>NaO<sub>2</sub>P, M + Na]<sup>+</sup>: 581.0964, Found: 581.0969.

**Optical Rotation:** [α]<sub>D</sub><sup>25</sup> = 44° (*c* = 1.0, DCM).

**HPLC analysis:** Chiralcel AD-H (Hexane/*i*-PrOH = 90:10, flow rate = 1.0 mL/min, wave length = 254 nm), *t*<sub>R</sub> = 21.543 min (minor), *t*<sub>R</sub> = 30.158 min (major).

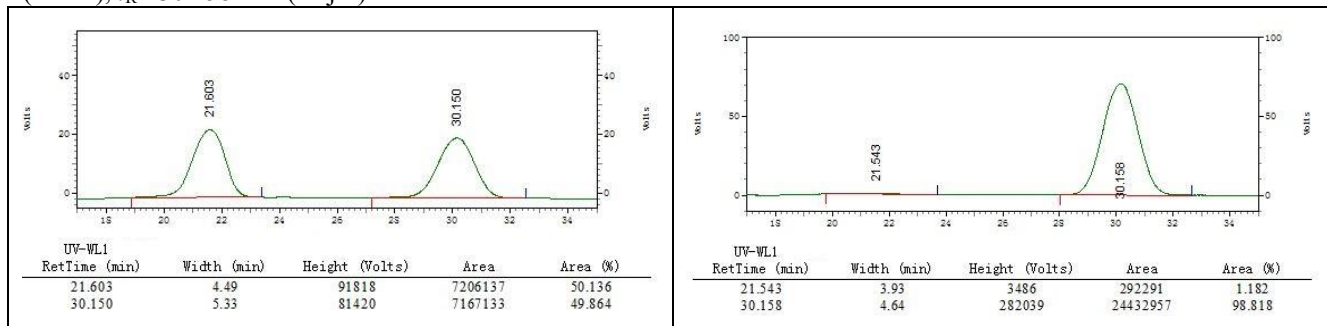

**(S)-(4-bromo-3-cyclopropyl-5-(2-hydroxynaphthalen-1-yl)-1H-pyrazol-1-yl) diphenylphosphine oxide (4s)**

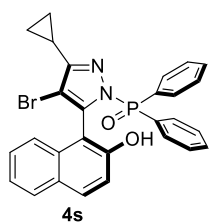

**Appearance:** yellow solid.

**Yield:** 75%, 39.6 mg. **ee** = 94%.

**<sup>1</sup>H NMR** (400 MHz, CDCl<sub>3</sub>) δ 7.77 (dd, *J* = 8.1, 4.2 Hz, 1H), 7.62 (dd, *J* = 12.0, 7.8 Hz, 4H), 7.41 – 7.37 (m, 4H), 7.37 – 7.32 (m, 3H), 7.23 (dd, *J* = 7.9, 3.2 Hz, 3H), 7.19 (d, *J* = 9.0 Hz, 1H), 1.92 (p, *J* = 7.1 Hz, 1H), 0.99 (d, *J* = 6.8 Hz, 4H).

**<sup>13</sup>C NMR** (100 MHz, CDCl<sub>3</sub>) δ 153.28, 148.79, 141.60, 134.24, 132.85, 132.48, 131.55, 131.41, 131.39, 131.14, 131.04, 128.64, 128.23, 128.14, 128.10, 126.77, 124.66, 123.48, 118.39, 108.56, 96.79, 7.32, 7.14.

**HRMS (ESI)** *m/z* Calcd for [C<sub>28</sub>H<sub>22</sub>BrN<sub>2</sub>NaO<sub>2</sub>P, M + Na]<sup>+</sup>: 551.0494, Found: 551.0490

**Optical Rotation:** [α]<sub>D</sub><sup>25</sup> = 36.2° (*c* = 1.0, DCM).

**HPLC analysis:** Chiralcel AD-H (Hexane/*i*-PrOH = 90:10, flow rate = 1.0 mL/min, wave length = 254 nm), *t<sub>R</sub>* = 14.733 min (minor), *t<sub>R</sub>* = 24.682 min (major).

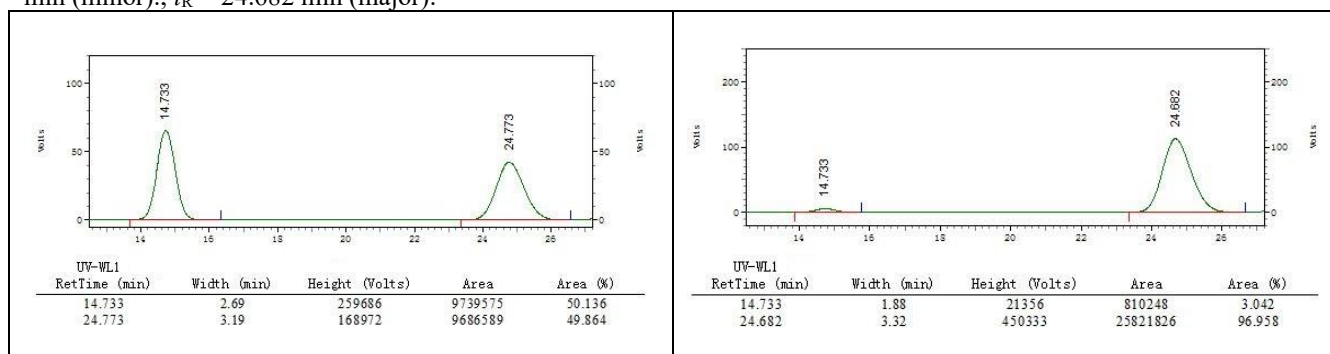

**(S)-(4-bromo-3-cyclobutyl-5-(2-hydroxynaphthalen-1-yl)-1H-pyrazol-1-yl) diphenylphosphine oxide (4t)**

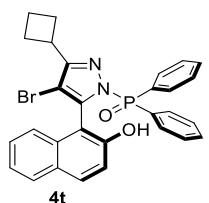

**Appearance:** white solid.

**Yield:** 75%, 40.6 mg. **ee** = 98%.

**<sup>1</sup>H NMR** (400 MHz, DMSO-*d*<sub>6</sub>) δ 9.91 (s, 1H), 7.73 (t, *J* = 8.7 Hz, 2H), 7.65 – 7.47 (m, 6H), 7.46 – 7.34 (m, 4H), 7.25 (p, *J* = 5.8 Hz, 2H), 7.05 (d, *J* = 8.9 Hz, 1H), 6.97 (d, *J* = 7.8 Hz, 1H), 3.61 (p, *J* = 8.4 Hz, 1H), 2.37 – 2.20 (m, 4H), 2.10 – 1.96 (m, 1H), 1.85 (dh, *J* = 11.7, 4.0 Hz, 1H).

**<sup>13</sup>C NMR** (100 MHz, DMSO-*d*<sub>6</sub>) δ 153.94, 135.64, 134.30, 133.60, 131.36, 130.89, 130.79, 130.39, 128.42, 128.29, 127.86, 127.49, 126.60, 123.77, 122.68, 118.10, 93.34, 31.74, 27.83, 18.14.

**HRMS (ESI)** *m/z* Calcd for [C<sub>29</sub>H<sub>24</sub>BrN<sub>2</sub>NaO<sub>2</sub>P, M + Na]<sup>+</sup>: 565.0651, Found: 565.0657.

**Optical Rotation:** [α]<sub>D</sub><sup>25</sup> = 102.0° (*c* = 0.15, DCM).

**HPLC analysis:** Chiralcel AD-H (Hexane/*i*-PrOH = 80:20, flow rate = 1.0 mL/min, wave length = 254 nm), *t<sub>R</sub>* = 6.074 min (minor), *t<sub>R</sub>* = 8.322 min (major).

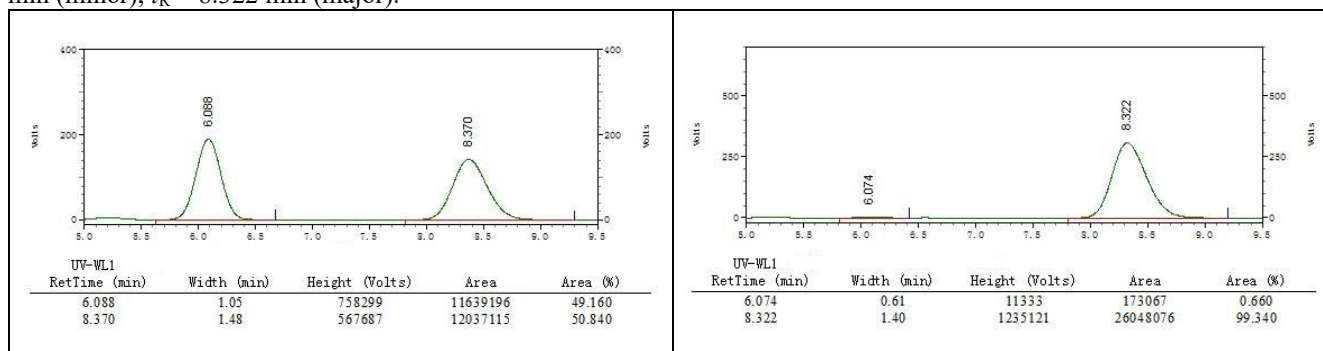

**(S)-(4-bromo-3-cyclohexyl-5-(2-hydroxynaphthalen-1-yl)-1H-pyrazol-1-yl) diphenylphosphine oxide (4u)**

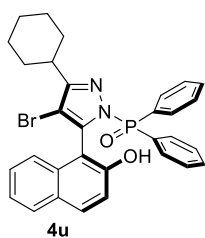

**Appearance:** white solid.

**Yield:** 75%, 42.8 mg. **ee** = 86%.

**<sup>1</sup>H NMR** (400 MHz, CDCl<sub>3</sub>) δ 7.91 (dd, *J* = 12.9, 7.7 Hz, 2H), 7.61 (dd, *J* = 21.5, 8.3 Hz, 3H), 7.52 – 7.34 (m, 4H), 7.22 – 7.16 (m, 2H), 7.03 (t, *J* = 7.4 Hz, 1H), 6.98 – 6.80 (m, 3H), 2.79 (t, *J* = 11.1 Hz, 1H), 2.00 (s, 2H), 1.81 (d, *J* = 11.4 Hz, 2H), 1.70 (d, *J* = 10.4 Hz, 1H), 1.50 (d, *J* = 13.9 Hz, 1H), 1.46 – 1.19 (m, 4H).

**<sup>13</sup>C NMR** (100 MHz, CDCl<sub>3</sub>) δ 159.59, 153.93, 142.27, 133.11, 133.00, 132.93, 132.12, 131.96, 131.75, 131.45, 131.35, 128.85, 128.13, 127.99, 127.85, 127.72, 126.25, 124.29, 123.45, 121.18, 111.91, 36.90, 31.06, 26.20, 26.02.

**HRMS (ESI)** *m/z* Calcd for [C<sub>31</sub>H<sub>28</sub>BrN<sub>2</sub>NaO<sub>2</sub>P, M + Na]<sup>+</sup>: 593.0964, Found: 593.0968.

**Optical Rotation:** [α]<sub>D</sub><sup>25</sup> = 43.2° (*c* = 1.0, acetone).

**HPLC analysis:** Chiralcel AD-H (Hexane/*i*-PrOH = 90:10, flow rate = 1.0 mL/min, wave length = 254 nm), *t*<sub>R</sub> = 11.661 min (minor), *t*<sub>R</sub> = 14.895 min (major).

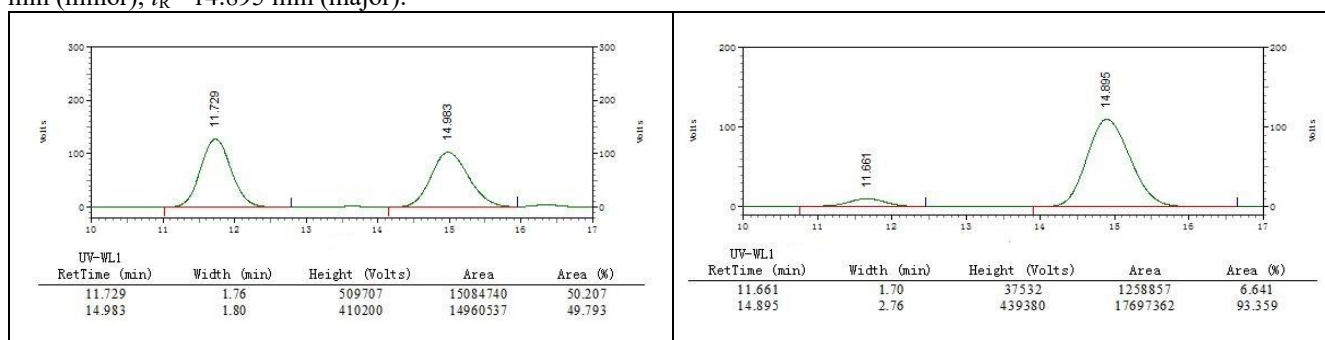

**(S)-(3-((3R,5R,7R)-adamantan-1-yl)-4-bromo-5-(2-hydroxynaphthalen-1-yl)-1H-pyrazol-1-yl) diphenylphosphine oxide (4v)**

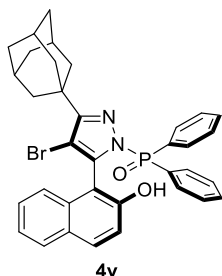

**Appearance:** white solid.

**Yield:** 77%, 44.0 mg. **ee** = 88%.

**<sup>1</sup>H NMR** (400 MHz, CDCl<sub>3</sub>) δ 7.94 (dd, *J* = 13.1, 7.7 Hz, 2H), 7.69 – 7.53 (m, 3H), 7.49 (td, *J* = 7.5, 3.7 Hz, 2H), 7.42 (dd, *J* = 13.0, 7.6 Hz, 2H), 7.20 (dd, *J* = 9.2, 5.8 Hz, 3H), 7.00 (t, *J* = 7.5 Hz, 1H), 6.96 – 6.91 (m, 1H), 6.88 (dt, *J* = 11.5, 5.6 Hz, 2H), 2.14 (m, *J* = 2.8 Hz, 5H), 2.06 (m, 3H), 1.76 (m, *J* = 3.1 Hz, 5H), 1.56 (m, 2H).

**<sup>13</sup>C NMR** (100 MHz, CDCl<sub>3</sub>) δ 153.84, 133.20, 133.09, 132.96, 132.94, 132.08, 131.87, 131.84, 131.80, 131.40, 131.29, 128.91, 128.08, 127.94, 127.80, 127.66, 126.26, 124.36, 123.54, 121.42, 112.38, 39.61, 36.76, 36.06, 28.41.

**HRMS (ESI)** *m/z* Calcd for [C<sub>35</sub>H<sub>32</sub>BrN<sub>2</sub>NaO<sub>2</sub>P, M + Na]<sup>+</sup>: 645.1277, Found: 645.1272.

**Optical Rotation:** [α]<sub>D</sub><sup>25</sup> = 38.0° (*c* = 1.0, acetone).

**HPLC analysis:** Chiralcel AD-H (Hexane/*i*-PrOH = 90:10, flow rate = 1.0 mL/min, wave length = 254 nm), *t*<sub>R</sub> = 8.804 min (minor), *t*<sub>R</sub> = 11.583 min (major).

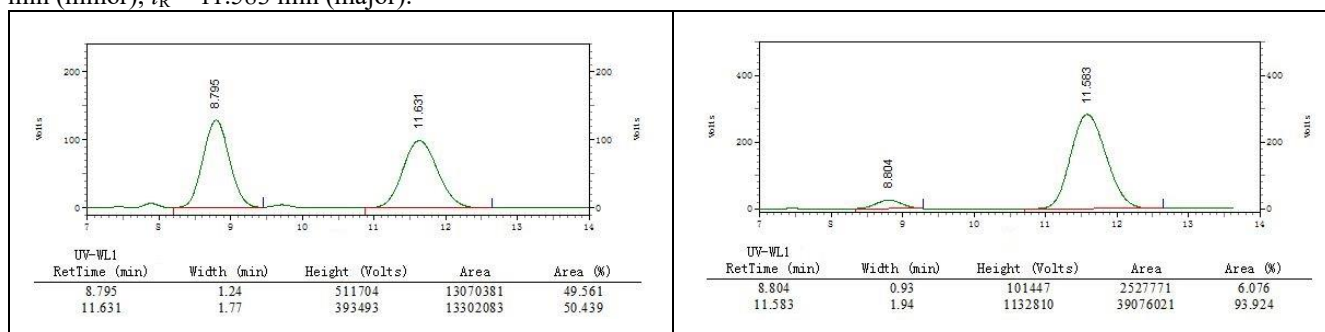

**(S)-(4-bromo-5-(2-hydroxynaphthalen-1-yl)-3-(p-tolyl)-1H-pyrazol-1-yl) diphenylphosphine oxide (4w)**

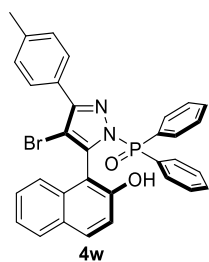

**Appearance:** white solid.

**Yield:** 78%, 45.0 mg. ee = 89%.

**<sup>1</sup>H NMR** (400 MHz, acetone-*d*<sub>6</sub>) δ 8.78 (s, 1H), 7.88 – 7.69 (m, 8H), 7.57 (t, *J* = 7.4 Hz, 1H), 7.50 – 7.41 (m, 3H), 7.34 (td, *J* = 7.5, 3.6 Hz, 2H), 7.28 (dd, *J* = 11.0, 5.4 Hz, 4H), 7.21 – 7.13 (m, 2H), 2.38 (s, 3H).

**<sup>13</sup>C NMR** (100 MHz, acetone-*d*<sub>6</sub>), 155.12, 139.66, 133.62, 133.60, 133.42, 133.40, 133.30, 133.19, 132.98, 132.87, 132.40, 129.89, 129.33, 129.12, 129.03, 128.99, 128.90, 128.81, 128.61, 127.43, 124.87, 123.87, 119.49, 119.32, 21.31.

**HRMS (ESI)** *m/z* Calcd for [C<sub>32</sub>H<sub>24</sub>BrN<sub>2</sub>NaO<sub>2</sub>P, M + Na]<sup>+</sup>: 601.0651, Found: 601.0657.

**Optical Rotation:** [α]<sub>D</sub><sup>25</sup> = 55.2° (*c* = 1.0, acetone).

**HPLC analysis:** Chiralcel AD-H (Hexane/*i*-PrOH = 85:15, flow rate = 1.0 mL/min, wave length = 254 nm), *t*<sub>R</sub> = 11.456 min (major), *t*<sub>R</sub> = 13.226 min (minor).

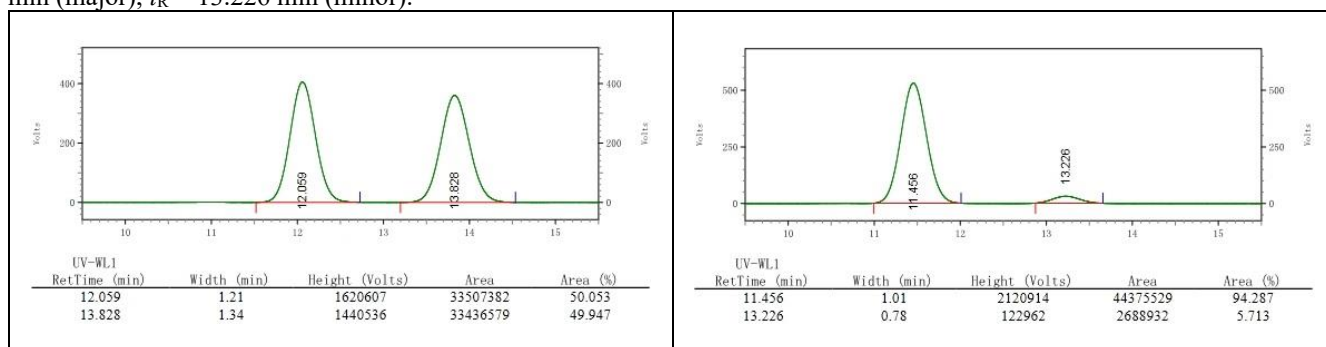

**(S)-(4-bromo-3-cyclopropyl-5-(2-hydroxy-7-methoxynaphthalen-1-yl)-1H-pyrazol-1-yl) diphenylphosphine oxide (4x)**

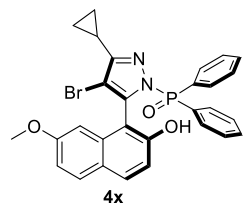

**Appearance:** white solid.

**Yield:** 70%, 39 mg. ee = 96%.

**<sup>1</sup>H NMR** (400 MHz, acetone-*d*<sub>6</sub>) δ 7.75 (dt, *J* = 23.6, 11.9 Hz, 5H), 7.60 (s, 4H), 7.51 – 7.44 (m, 1H), 7.38 (s, 2H), 7.12 (d, *J* = 8.7 Hz, 1H), 6.98 (d, *J* = 8.4 Hz, 1H), 6.81 (s, 1H), 3.74 (s, 3H), 1.00 (d, *J* = 6.6 Hz, 4H).

**<sup>13</sup>C NMR** (100 MHz, acetone-*d*<sub>6</sub>) 159.55, 155.47, 149.95, 140.67, 135.91, 134.45, 132.44, 132.42, 131.98, 131.88, 131.52, 130.47, 129.26, 129.13, 124.71, 116.30, 116.00, 109.48, 104.56, 96.23, 55.39, 8.13, 7.68.

**HRMS (ESI)** *m/z* Calcd for [C<sub>29</sub>H<sub>24</sub>BrN<sub>2</sub>NaO<sub>3</sub>P, M + Na]<sup>+</sup>: 581.0600, Found: 581.0605.

**Optical Rotation:** [α]<sub>D</sub><sup>25</sup> = 45.4° (*c* = 1.0, acetone).

**HPLC analysis:** Chiralcel AD-H (Hexane/*i*-PrOH = 85:15, flow rate = 1.0 mL/min, wave length = 254 nm), *t*<sub>R</sub> = 9.827 min (minor), *t*<sub>R</sub> = 20.249 min (major).

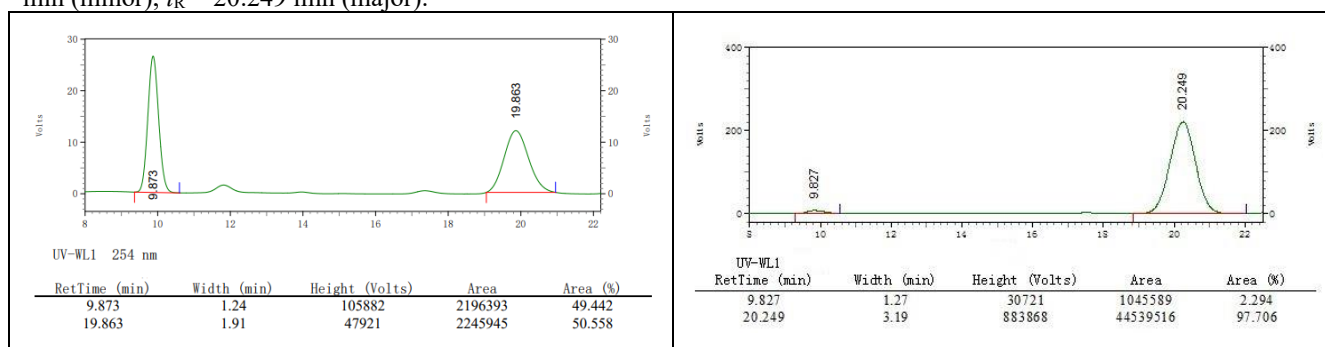

**(S)-(4-bromo-5-(7-bromo-2-hydroxynaphthalen-1-yl)-3-(tert-butyl)-1H-pyrazol-1-yl) diphenylphosphine oxide (4y)**

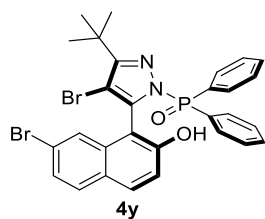

**Appearance:** white solid.

**Yield:** 98%, 50.7 mg. **ee** = 86%.

**<sup>1</sup>H NMR** (400 MHz, acetone-*d*<sub>6</sub>) δ 9.17 (s, 1H), 7.89 – 7.74 (m, 3H), 7.73 – 7.57 (m, 4H), 7.54 – 7.42 (m, 3H), 7.40 – 7.29 (m, 3H), 7.16 (d, *J* = 8.4 Hz, 2H), 1.44 (s, 9H).

**<sup>13</sup>C NMR** (100 MHz, CDCl<sub>3</sub>) δ 154.57, 143.24, 143.16, 133.03, 132.93, 132.23, 131.59, 131.48, 130.79, 130.60, 129.47, 128.11, 127.97, 127.83, 125.91, 121.93, 116.92, 111.49, 100.42, 33.84,

28.51.

**HRMS (ESI)** *m/z* Calcd for [C<sub>29</sub>H<sub>25</sub>Br<sub>2</sub>N<sub>2</sub>NaO<sub>2</sub>P, M + Na]<sup>+</sup>: 644.9913, Found: 644.9918.

**Optical Rotation:** [α]<sub>D</sub><sup>25</sup> = 35.0° (*c* = 0.5, acetone).

**HPLC analysis:** Chiralcel AD-H (Hexane/*i*-PrOH = 90:10, flow rate = 1.0 mL/min, wave length = 254 nm), *t*<sub>R</sub> = 6.313 min (minor), *t*<sub>R</sub> = 18.938 min (major).

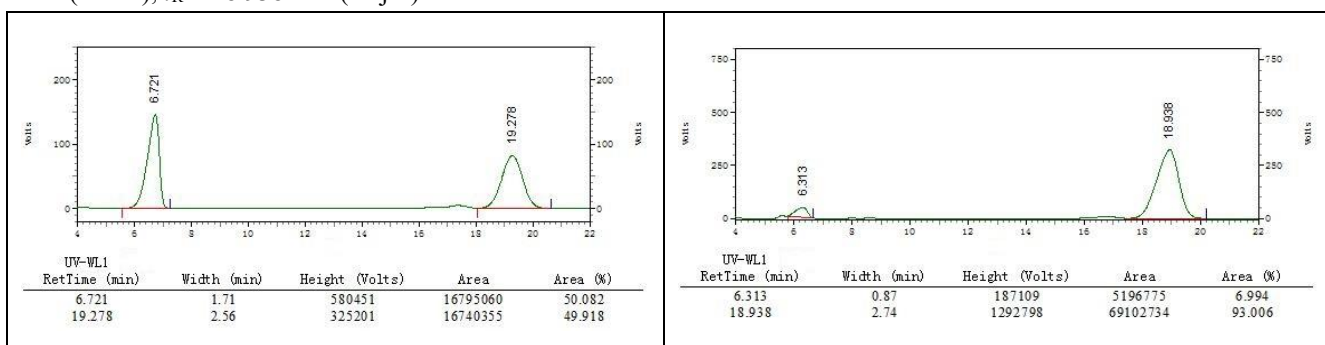

**(S)-(4-bromo-5-(6-bromo-2-hydroxynaphthalen-1-yl)-3-(tert-butyl)-1H-pyrazol-1-yl) diphenylphosphine oxide (4z)**

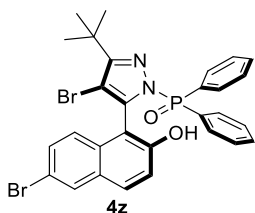

**Appearance:** white solid.

**Yield:** 97%, 51.5 mg. **ee** = 87%.

**<sup>1</sup>H NMR** (400 MHz, CDCl<sub>3</sub>) δ 8.74 (s, 1H), 7.92 (dd, *J* = 12.9, 7.8 Hz, 2H), 7.72 (s, 1H), 7.63 – 7.56 (m, 1H), 7.52 – 7.40 (m, 5H), 7.24 (s, 1H), 7.13 (t, *J* = 7.3 Hz, 1H), 7.06 (s, 1H), 6.99 – 6.89 (m, 2H), 6.81 (d, *J* = 8.9 Hz, 1H), 1.43 (s, 9H).

**<sup>13</sup>C NMR** (100 MHz, CDCl<sub>3</sub>) δ 154.57, 143.16, 133.03, 132.96, 132.93, 132.23, 132.20, 131.59, 131.48, 130.79, 130.60, 129.77, 129.70, 129.47, 128.11, 127.97, 127.83, 125.91, 100.39, 33.84, 28.51.

**HRMS (ESI)** *m/z* Calcd for [C<sub>29</sub>H<sub>25</sub>Br<sub>2</sub>N<sub>2</sub>NaO<sub>2</sub>P, M + Na]<sup>+</sup>: 644.9913, Found: 644.9917.

**Optical Rotation:** [α]<sub>D</sub><sup>25</sup> = 31.6° (*c* = 0.5, acetone).

**HPLC analysis:** Chiralcel AD-H (Hexane/*i*-PrOH = 85:15, flow rate = 1.0 mL/min, wave length = 254 nm), *t*<sub>R</sub> = 6.879 min (major), *t*<sub>R</sub> = 7.638 min (minor).

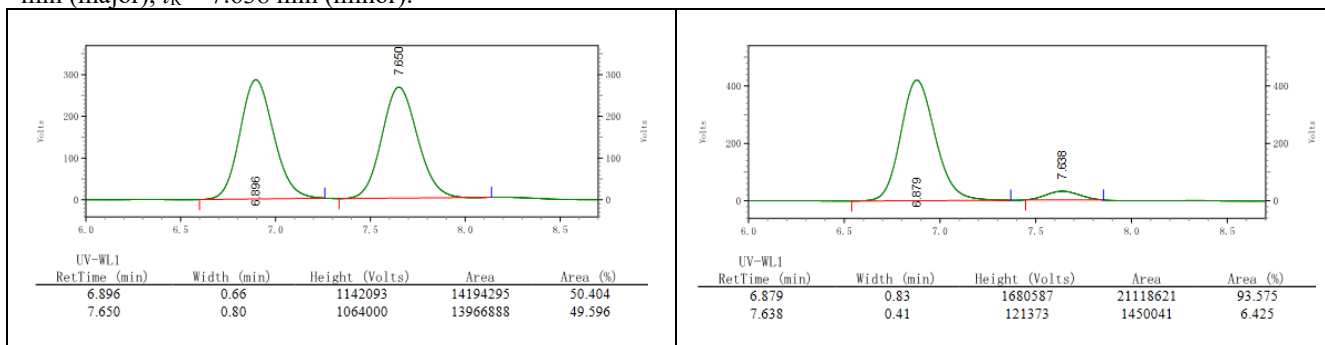

**(S)-(4-bromo-5-(6-bromo-2-hydroxynaphthalen-1-yl)-3-(pentan-3-yl)-1H-pyrazol-1-yl) diphenylphosphine oxide (4aa)**

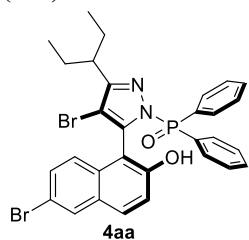

**Appearance:** white solid.

**Yield:** 72%, 52.2 mg. **ee** = 92%.

**<sup>1</sup>H NMR** (400 MHz, CDCl<sub>3</sub>) δ 8.88 (s, 1H), 7.90 (s, 1H), 7.75 – 7.64 (m, 3H), 7.47 (d, *J* = 29.0 Hz, 4H), 7.37 (dd, *J* = 13.8, 8.3 Hz, 3H), 7.23 (d, *J* = 7.3 Hz, 2H), 7.16 (d, *J* = 6.9 Hz, 3H), 2.89 – 2.80 (m, 1H), 1.87 (dq, *J* = 14.3, 7.1, 6.7 Hz, 4H), 0.93 (dt, *J* = 15.4, 7.3 Hz, 6H).

**<sup>13</sup>C NMR** (100 MHz, acetone-*d*<sub>6</sub>) δ 206.23, 149.37, 149.29, 133.45, 132.98, 132.76, 132.65, 132.57, 132.50, 132.47, 131.15, 130.93, 130.82, 129.72, 129.58, 129.44, 128.47, 128.36, 121.84,

121.81, 119.67, 41.60, 29.85, 28.14, 12.66.

**HRMS (ESI)** *m/z* Calcd for [C<sub>30</sub>H<sub>27</sub>Br<sub>2</sub>N<sub>2</sub>NaO<sub>2</sub>P, M + Na]<sup>+</sup>: 659.0069, Found: 659.0063.

**Optical Rotation:** [α]<sub>D</sub><sup>25</sup> = 26.5° (*c* = 0.3, acetone).

**HPLC analysis:** Chiralcel AD-H (Hexane/*i*-PrOH = 90:10, flow rate = 1.0 mL/min, wave length = 254 nm), *t*<sub>R</sub> = 9.869min (minor), *t*<sub>R</sub> = 13.825 min (major).

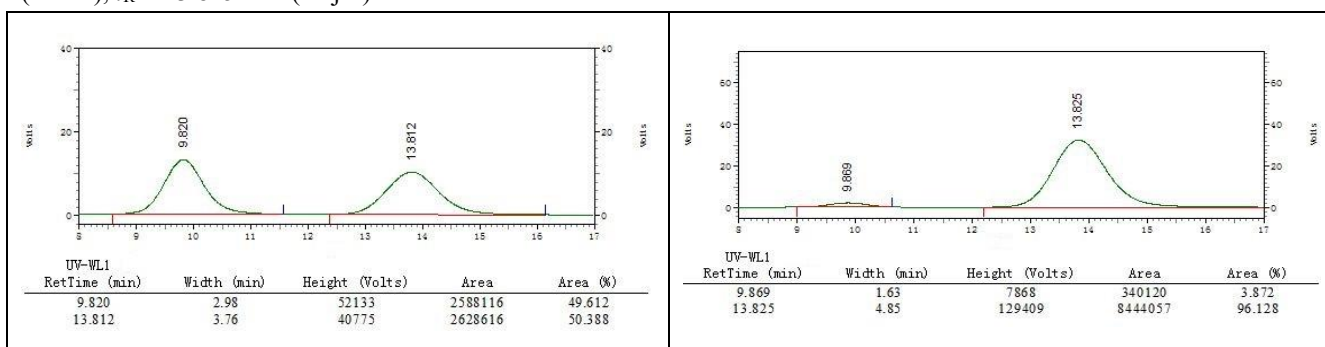



## V. Racemization studies

### Racemization studies of **2k**

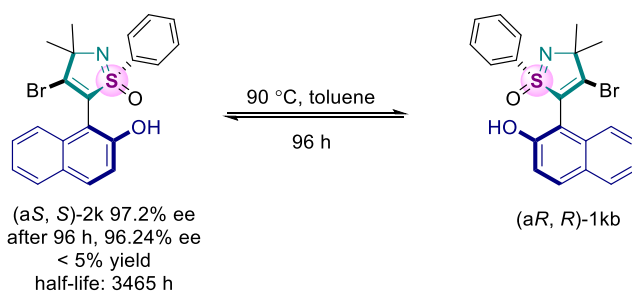

Thermal Racemization of **2k**: A solution of **2k** (17.5 mg, 97% ee) in toluene (3 mL) was heated at 90 °C. At intervals, small samples were taken and the solvent was removed by evaporation. The enantiomeric excess was determined by using HPLC (HPLC conditions: Chiralcel OD-H, Hexane/*i*-PrOH = 85:15, flow rate = 1.0 mL/min, wave length = 254 nm).

**Supplementary Table 4. The change of the ee value of **2k** at 90 °C.**

| Time/h | % second eluted enantiomer (%t) | ln ((%t-50)/(%0-50)) |
|--------|---------------------------------|----------------------|
| 0      | 97.20                           | 0                    |
| 0.166  | 97.18                           | -0.00042             |
| 0.25   | 97.16                           | -0.00085             |
| 0.42   | 97.14                           | -0.00127             |
| 0.75   | 97.14                           | -0.00127             |
| 1      | 97.12                           | -0.0017              |
| 1.916  | 97.11                           | -0.00191             |
| 3.916  | 97.10                           | -0.00212             |
| 5.916  | 97.05                           | -0.00318             |
| 10.416 | 96.98                           | -0.00467             |
| 16.416 | 96.95                           | -0.00531             |
| 21.42  | 96.91                           | -0.00616             |
| 25.42  | 96.85                           | -0.00744             |
| 29.42  | 96.81                           | -0.0083              |
| 33.42  | 96.80                           | -0.00851             |
| 37.42  | 96.74                           | -0.00979             |
| 41.42  | 96.69                           | -0.01086             |
| 45.42  | 96.67                           | -0.01138             |
| 49.42  | 96.64                           | -0.01194             |
| 54.42  | 96.58                           | -0.01322             |
| 58.42  | 96.55                           | -0.01387             |
| 62.42  | 96.52                           | -0.01451             |
| 69     | 96.48                           | -0.01537             |
| 73     | 96.46                           | -0.0158              |
| 77     | 96.42                           | -0.01666             |
| 81     | 96.34                           | -0.01839             |
| 85     | 96.30                           | -0.01925             |
| 93     | 96.27                           | -0.0199              |
| 97     | 96.24                           | -0.02055             |

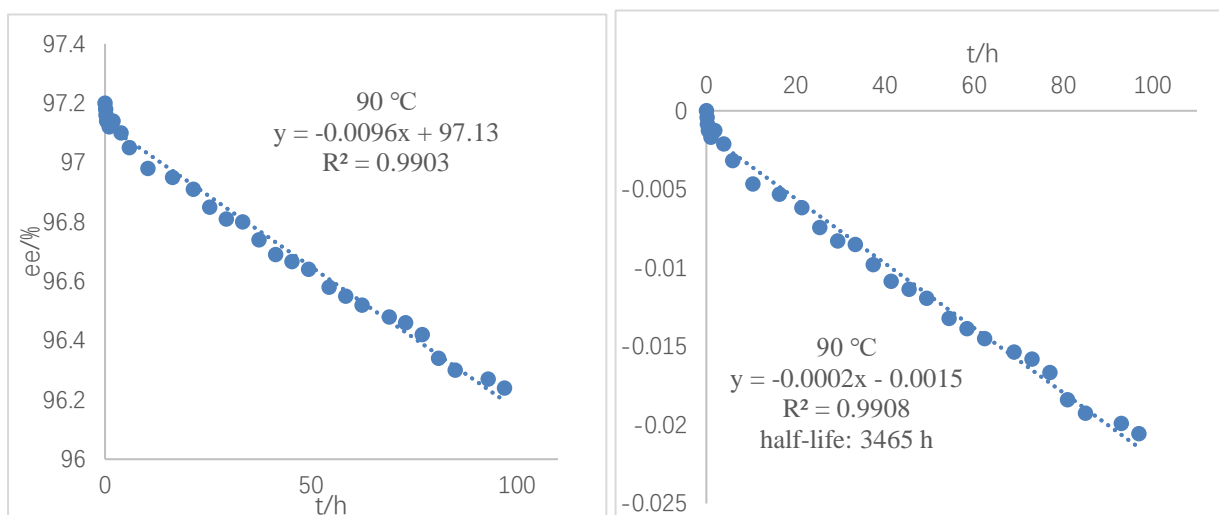

**Supplementary Figure 3.** Plot of the racemization of compound **2k** at 90 °C.

### Racemization studies of **4f**

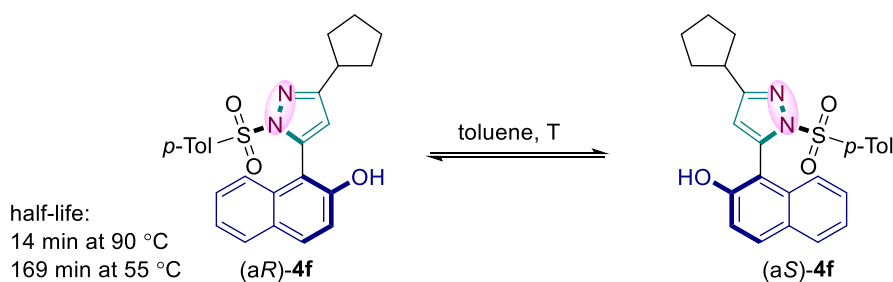

Thermal Racemization of **4f**: A solution of **4f** (20 mg, 95% ee) in toluene (3 mL) was heated at given temperature. At intervals, small samples were taken and the solvent was removed by evaporation. The enantiomeric excess was determined by using HPLC (HPLC conditions: Chiralcel OD-H, Hexane/i-PrOH = 90:10, flow rate = 1.0 mL/min, wave length = 254 nm).

**Supplementary Table 5.** The change of the ee value of **4f** at 90 °C.

| Time/min | % second eluted enantiomer (%t) | $\ln ((\%t-50)/(\%0-50))$ |
|----------|---------------------------------|---------------------------|
| 0        | 95                              | 0                         |
| 2        | 92.52                           | -0.05802                  |
| 7        | 86.02                           | -0.22392                  |
| 12       | 79.5                            | -0.4236                   |
| 17       | 73.74                           | -0.64083                  |
| 22       | 63.95                           | -1.17252                  |
| 27       | 58.18                           | -1.70630                  |
| 32       | 51.68                           | -3.28920                  |

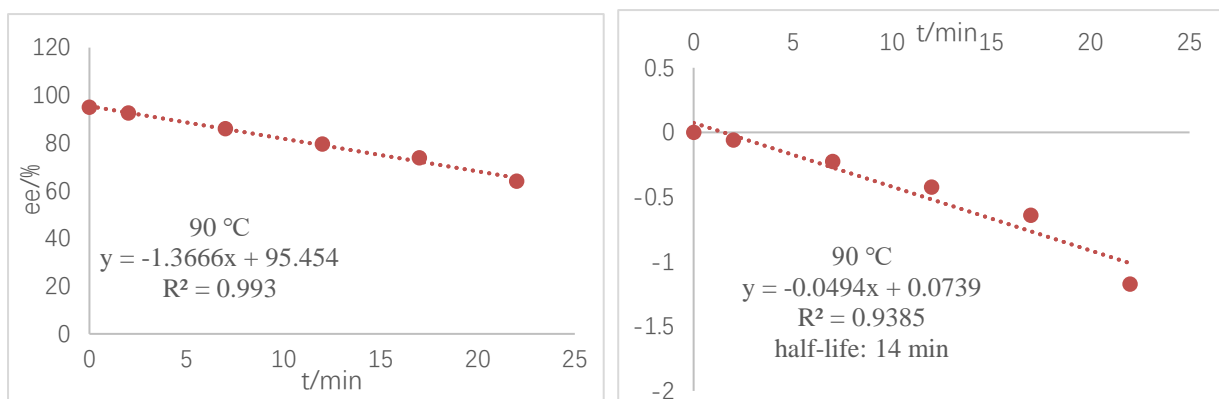

**Supplementary Figure 4.** Plot of the racemization of compound **4f** at 90 °C.

**Supplementary Table 6.** The change of the ee value of **4f** at 55 °C.

| Time/min | % second eluted enantiomer (%t) | $\ln ((\%t-50)/(\%0-50))$ |
|----------|---------------------------------|---------------------------|
| 0        | 95                              | 0                         |
| 10       | 94.1                            | -0.0202                   |
| 20       | 92.35                           | -0.06069                  |
| 30       | 91.1                            | -0.09065                  |
| 40       | 90.4                            | -0.10783                  |
| 50       | 88.55                           | -0.15471                  |
| 60       | 87.85                           | -0.17303                  |
| 70       | 86.34                           | -0.21374                  |
| 80       | 84.62                           | -0.26223                  |
| 90       | 83.98                           | -0.28089                  |
| 100      | 82.82                           | -0.31562                  |
| 110      | 81.48                           | -0.35731                  |
| 120      | 80.3                            | -0.39551                  |
| 130      | 78.9                            | -0.44282                  |
| 140      | 77.56                           | -0.49030                  |
| 150      | 76.48                           | -0.53027                  |
| 160      | 74.84                           | -0.59421                  |
| 170      | 73.94                           | -0.63111                  |
| 185      | 72.56                           | -0.69048                  |
| 200      | 71.1                            | -0.75739                  |
| 220      | 69.08                           | -0.85802                  |
| 240      | 67.38                           | -0.95134                  |
| 270      | 64.76                           | -1.11474                  |

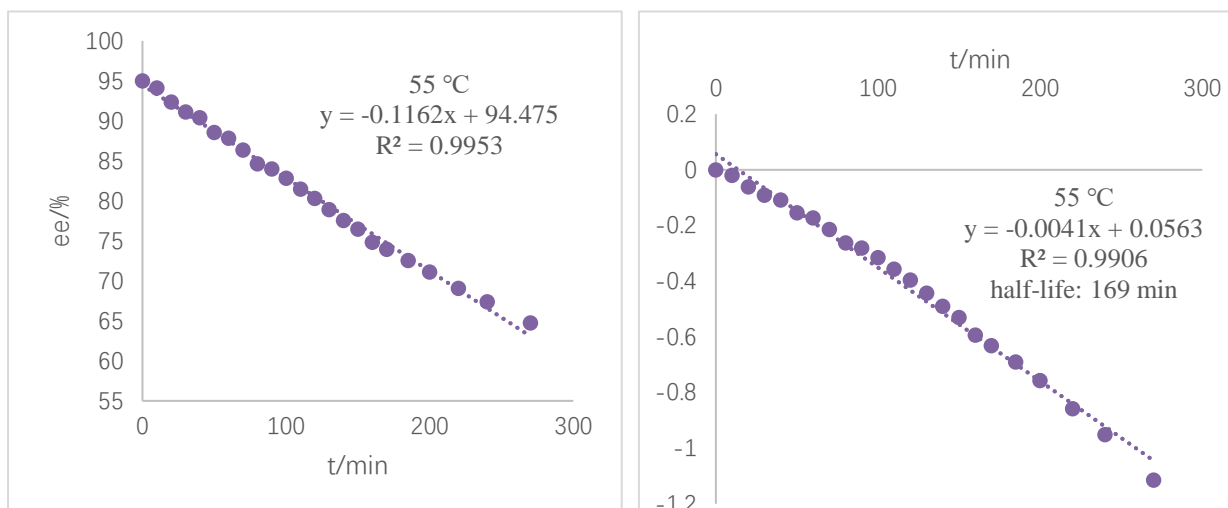

**Supplementary Figure 5.** Plot of the racemization of compound **4f** at 55 °C.

Racemization studies of *N*-diphenylphosphine oxide pyrazoles (**4q-4aa**): The *N*-diphenylphosphine oxide pyrazole compounds were unstable and easily decomposes under heating conditions.

## VI. Control experiments and plausible catalytic cycle

Compound ( $\pm$ )-**11'** was prepared according to the general procedure as described for **S3**. The control experiment was carried out following the standard conditions: 0.05 mmol ( $\pm$ )-**11'** and 10 mol% catalyst **F** in DCM (2.0 mL) at -78 °C for 0.5 h.

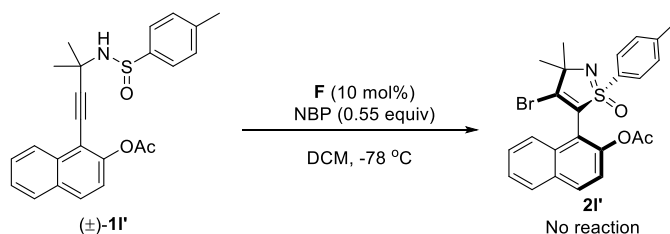

### Analytical dates of **11'**

#### 1-(3-methyl-3-((p-tolylsulfinyl)amino)but-1-yn-1-yl)naphthalen-2-yl acetate (**11'**)

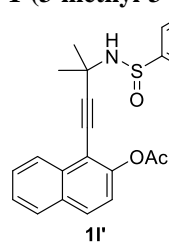

**Appearance:** yellow oil.

**<sup>1</sup>H NMR** (400 MHz, CDCl<sub>3</sub>)  $\delta$  8.33 (d,  $J$  = 8.3 Hz, 1H), 7.82 (d,  $J$  = 8.7 Hz, 2H), 7.63 (d,  $J$  = 8.2 Hz, 2H), 7.58 (d,  $J$  = 7.2 Hz, 1H), 7.49 (t,  $J$  = 7.5 Hz, 1H), 7.27 (d,  $J$  = 8.7 Hz, 2H), 7.23 (d,  $J$  = 8.9 Hz, 1H), 4.32 (s, 1H), 2.41 (s, 3H), 2.38 (s, 3H), 1.88 (s, 3H), 1.80 (s, 3H).

**<sup>13</sup>C NMR** (100 MHz, CDCl<sub>3</sub>)  $\delta$  168.93, 150.39, 142.95, 141.21, 133.84, 131.12, 129.77, 129.46, 128.06, 127.42, 126.12, 126.04, 125.36, 120.95, 112.56, 102.19, 77.08, 52.02, 32.05, 31.77, 21.25,

20.93.

**HRMS (ESI)**  $m/z$  Calcd for [C<sub>24</sub>H<sub>23</sub>NNaO<sub>3</sub>S, M + Na]<sup>+</sup>: 428.1291, Found: 428.1295.

Compound ( $\pm$ )-**11''** was prepared according to the general procedure as following. (Using the synthesis method of **S3** to get **S3'**). To a solution of the **S3'** (1.0 equiv) in methanol (0.5 M) was added NaBH<sub>4</sub> (1.1 equiv) at 0 °C and move to room temperature, After the reaction was completed by TLC monitored. The reaction was quenched by pouring into cooled saturated NH<sub>4</sub>Cl aqueous and the mixture was extracted with EA. The organic phases were combined, washed with brine, dried over Na<sub>2</sub>SO<sub>4</sub>, and concentrated to afford the crude product. The crude product was purified by column chromatography on silica gel (PE/EA = 5:1) to afford ( $\pm$ )-**11''**.

The control experiment was carried out following the standard conditions: 0.05 mmol ( $\pm$ )-**11''** and 10 mol% catalyst **F** in DCM (2.0 mL) at -78 °C for 0.5 h.

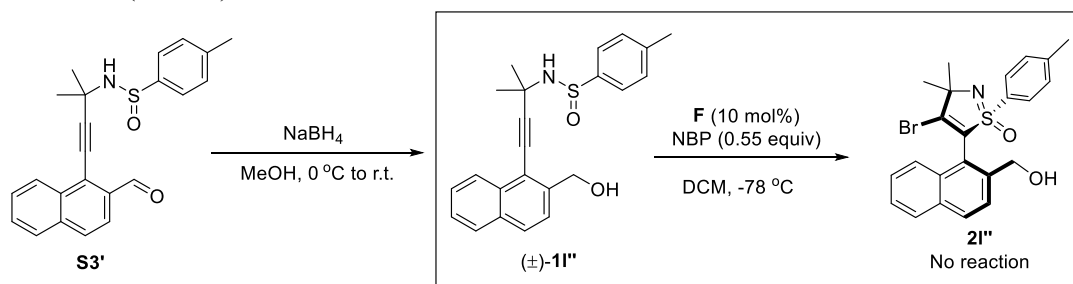

## Analytical dates of 11''

### *N*-(4-(2-(hydroxymethyl)naphthalen-1-yl)-2-methylbut-3-yn-2-yl)-4-methylbenzenesulfonamide (11'')

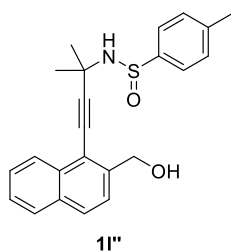

**Appearance:** white solid.

**<sup>1</sup>H NMR** (400 MHz, CDCl<sub>3</sub>) δ 8.29 (d, *J* = 8.3 Hz, 1H), 7.84 – 7.74 (m, 2H), 7.59 (d, *J* = 7.5 Hz, 2H), 7.54 (t, *J* = 7.5 Hz, 2H), 7.50 – 7.44 (m, 1H), 7.25 (d, *J* = 5.7 Hz, 2H), 4.96 (q, *J* = 12.4 Hz, 2H), 4.64 (s, 1H), 4.47 (s, 1H), 2.37 (s, 3H), 1.88 (s, 3H), 1.78 (s, 3H).

**<sup>13</sup>C NMR** (100 MHz, CDCl<sub>3</sub>) δ 142.41, 142.05, 141.41, 133.44, 132.45, 129.52, 128.61, 128.07, 126.72, 126.59, 126.02, 125.92, 125.45, 125.06, 118.57, 102.22, 79.92, 64.01, 51.02, 32.31, 30.46, 21.28.

**HRMS (ESI)** *m/z* Calcd for [C<sub>23</sub>H<sub>23</sub>NNaO<sub>2</sub>S, M + Na]<sup>+</sup>: 400.1342, Found: 400.1349.

Compound (±)-**3i'** was prepared according to the general procedure as described for **S7**. The control experiment was carried out following the standard conditions: 0.05 mmol (±)-**3a'** and 10 mol% catalyst **C** in DCM (2.0 mL) at 25 °C for 12 h.

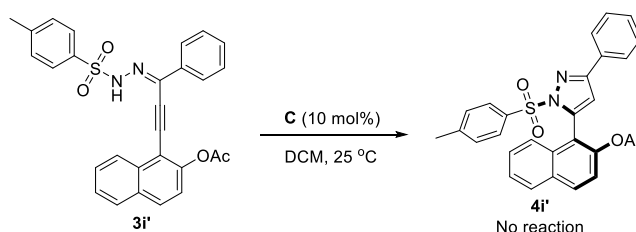

## Analytical dates of 3i'

### (*Z*)-1-(3-phenyl-3-(2-tosylhydrazineylidene)prop-1-yn-1-yl)naphthalen-2-yl acetate(3i')

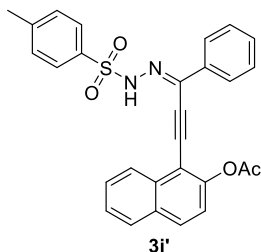

**Appearance:** white solid.

**<sup>1</sup>H NMR** (400 MHz, CDCl<sub>3</sub>) δ 8.83 (s, 1H), 8.22 (d, *J* = 8.3 Hz, 1H), 8.01 – 7.95 (m, 3H), 7.92 (t, *J* = 7.6 Hz, 3H), 7.67 (d, *J* = 7.1 Hz, 1H), 7.57 (t, *J* = 7.2 Hz, 1H), 7.47 – 7.40 (m, 3H), 7.35 (d, *J* = 9.0 Hz, 1H), 7.32 (d, *J* = 8.2 Hz, 2H), 2.49 (s, 3H), 2.41 (s, 3H).

**<sup>13</sup>C NMR** (100 MHz, CDCl<sub>3</sub>) δ 169.12, 151.59, 144.37, 135.62, 135.44, 133.87, 133.25, 132.20, 131.08, 130.26, 129.73, 128.57, 128.42, 127.94, 126.72, 126.60, 125.31, 121.19, 110.39, 98.11, 86.71, 21.61, 21.24.

**HRMS (ESI)** *m/z* Calcd for [C<sub>28</sub>H<sub>22</sub>N<sub>2</sub>NaO<sub>4</sub>S, M + Na]<sup>+</sup>: 505.1192, Found: 505.1187.

Compound (±)-**3q'** was prepared according to the general procedure as described for **S8**. The control experiment was carried out following the standard conditions: 0.05 mmol (±)- **3q'** and 20 mol% catalyst **E** in toluene (1.0 mL) at 25 °C for 1.0 h.

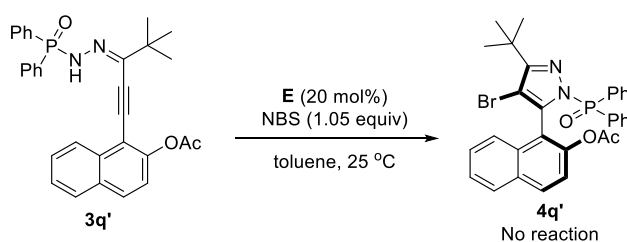

## Analytical dates of 3q'

### (Z)-1-(3-(2-(diphenylphosphoryl)hydrazineylidene)-4,4-dimethylpent-1-yn-1-yl)naphthalen-2-yl acetate (3q')

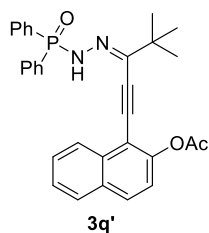

**Appearance:** white solid.

**<sup>1</sup>H NMR** (400 MHz, CDCl<sub>3</sub>) δ 8.12 (d, *J* = 7.6 Hz, 1H), 7.92 (d, *J* = 7.3 Hz, 2H), 7.89 (d, *J* = 8.3 Hz, 3H), 7.87 – 7.84 (m, 1H), 7.80 (d, *J* = 20.9 Hz, 1H), 7.58 – 7.52 (m, 2H), 7.47 (td, *J* = 7.5, 3.4 Hz, 5H), 7.28 (s, 1H), 2.28 (s, 3H), 1.81 (s, 1H), 1.25 (s, 9H).

**<sup>13</sup>C NMR** (100 MHz, CDCl<sub>3</sub>) δ 158.34, 158.24, 154.08, 142.65, 132.89, 132.82, 132.21, 132.02, 131.46, 128.61, 128.50, 128.43, 128.13, 127.99, 127.90, 127.80, 127.66, 126.33, 123.94, 123.22,

120.53, 117.80, 111.01, 102.98, 41.19, 26.34, 26.14, 11.89.

**HRMS (ESI)** *m/z* Calcd for [C<sub>31</sub>H<sub>29</sub>N<sub>2</sub>NaO<sub>3</sub>P, M + Na]<sup>+</sup>: 531.1808, Found: 531.1802.

### Plausible catalytic cycle

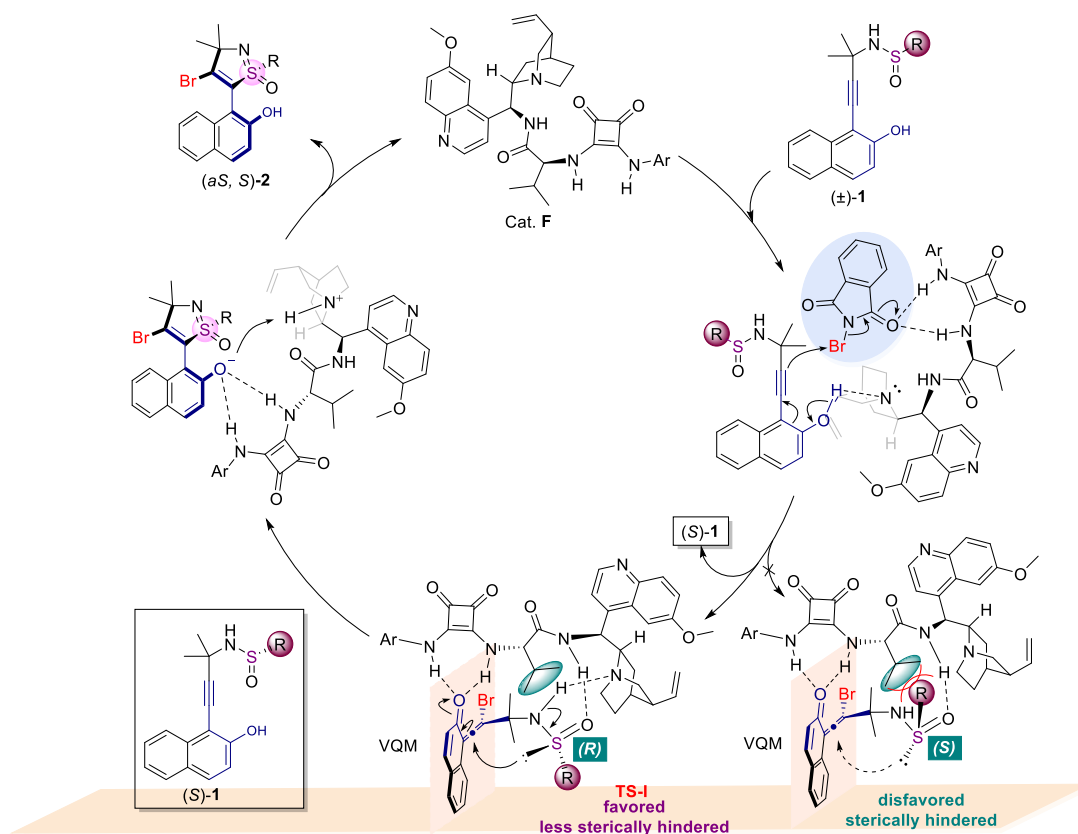

Supplementary Figure 6. Plausible catalytic cycle for (±)-1.

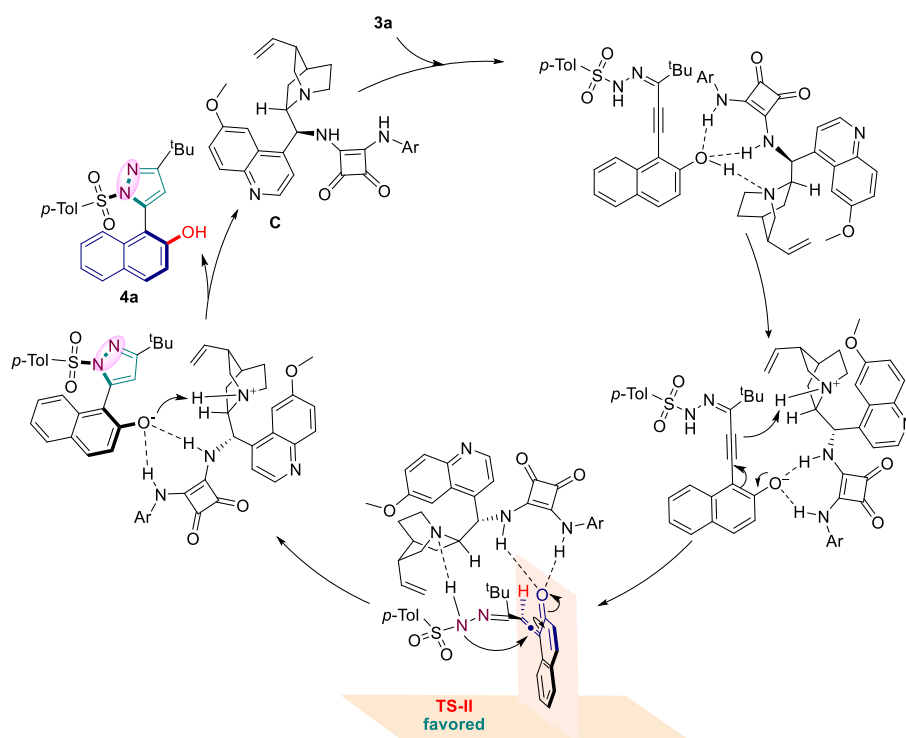

Supplementary Figure 7. Plausible catalytic cycle for 3a.



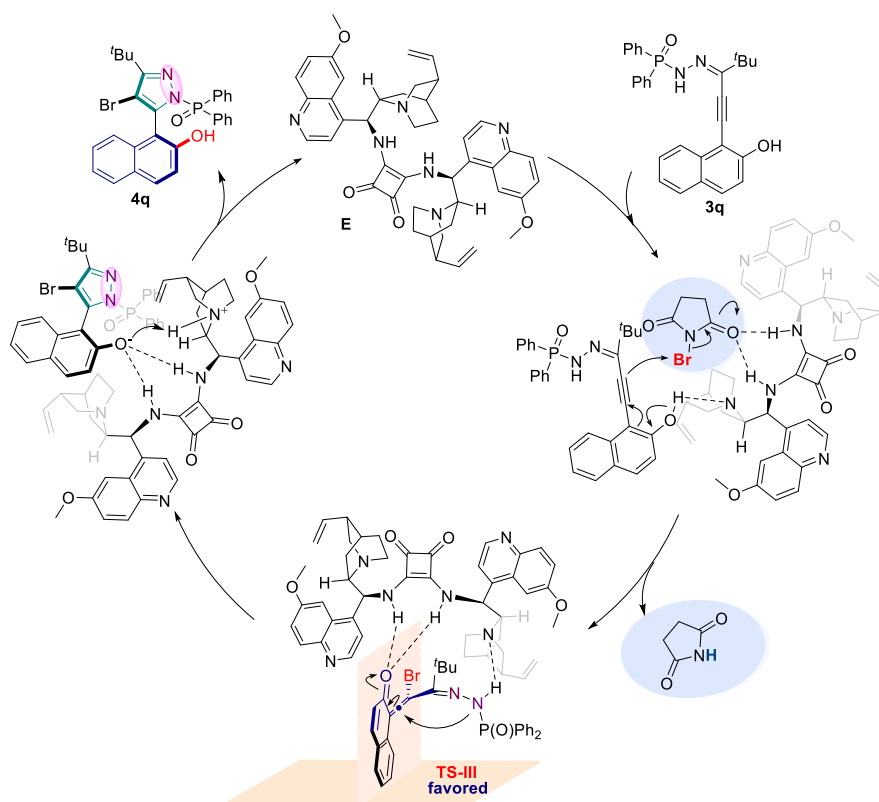

Supplementary Figure 8. Plausible catalytic cycle for **3q**.

## VII. $^1\text{H}$ and $^{13}\text{C}$ NMR spectra

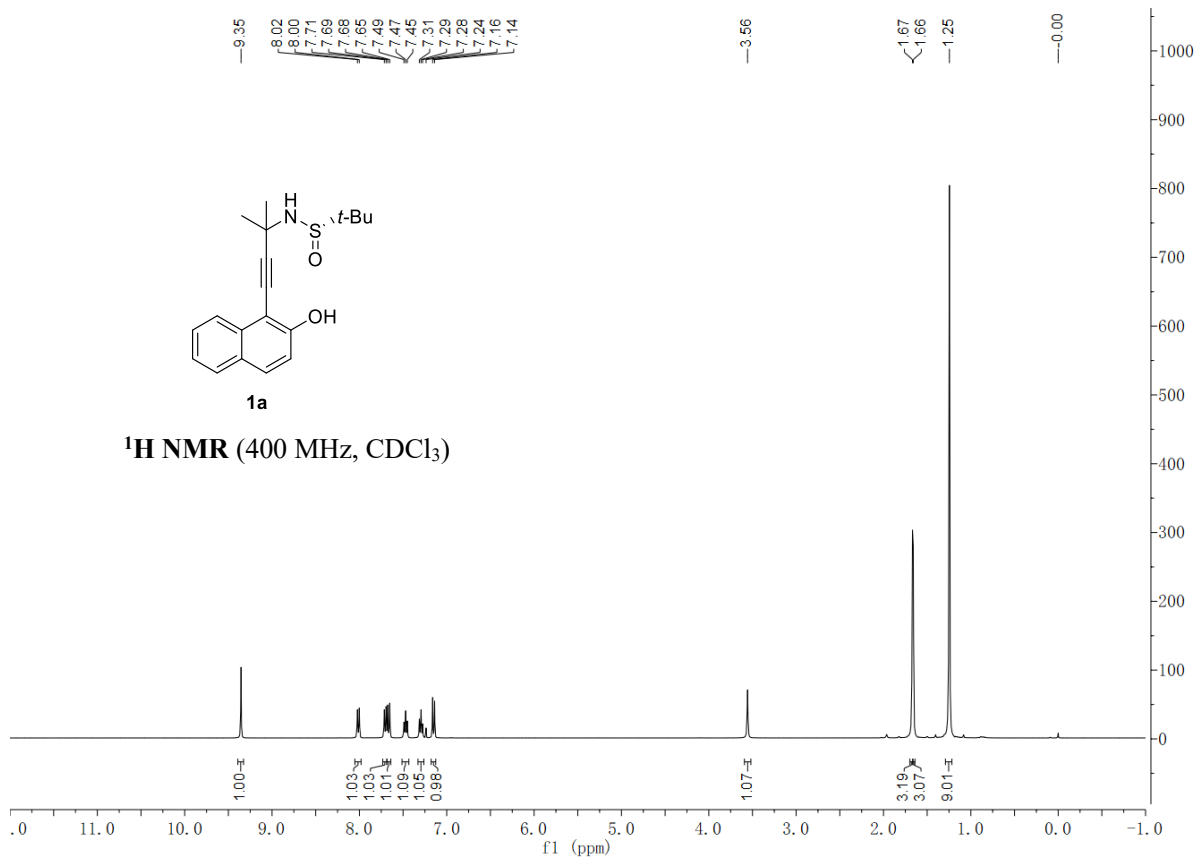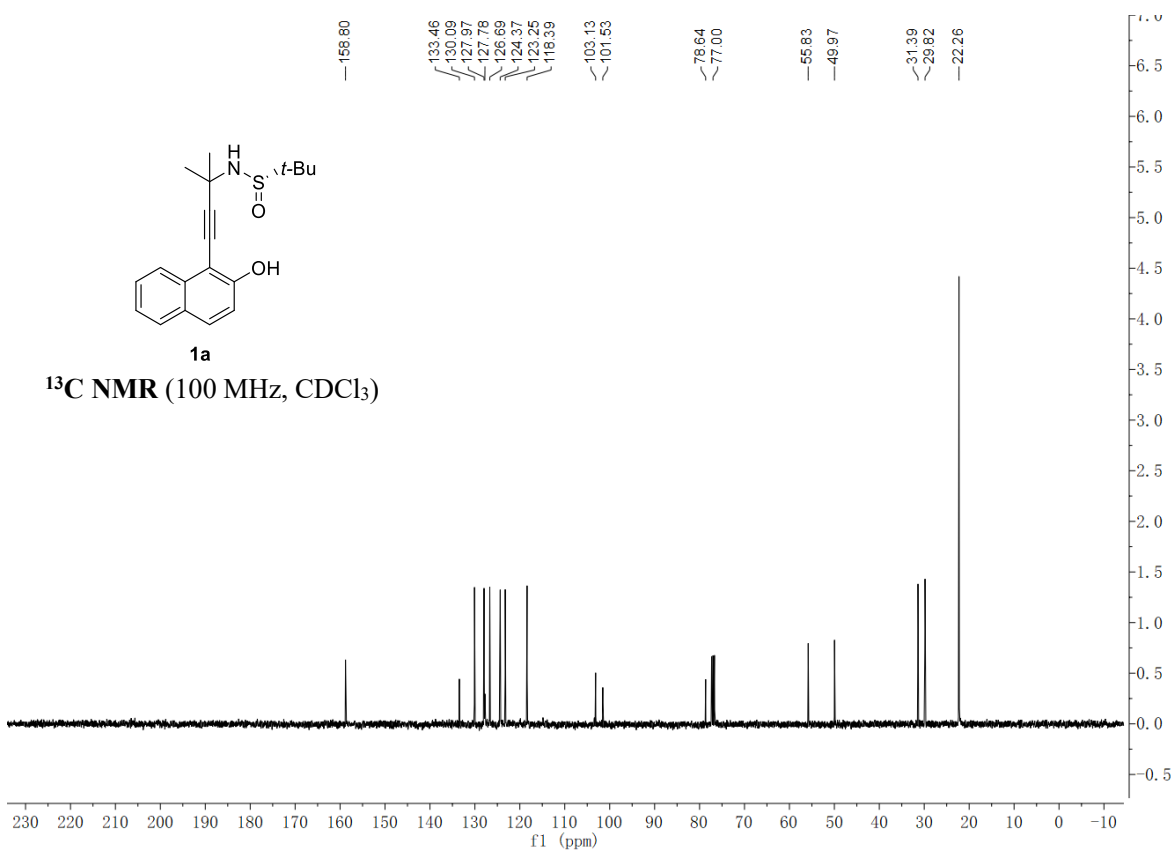

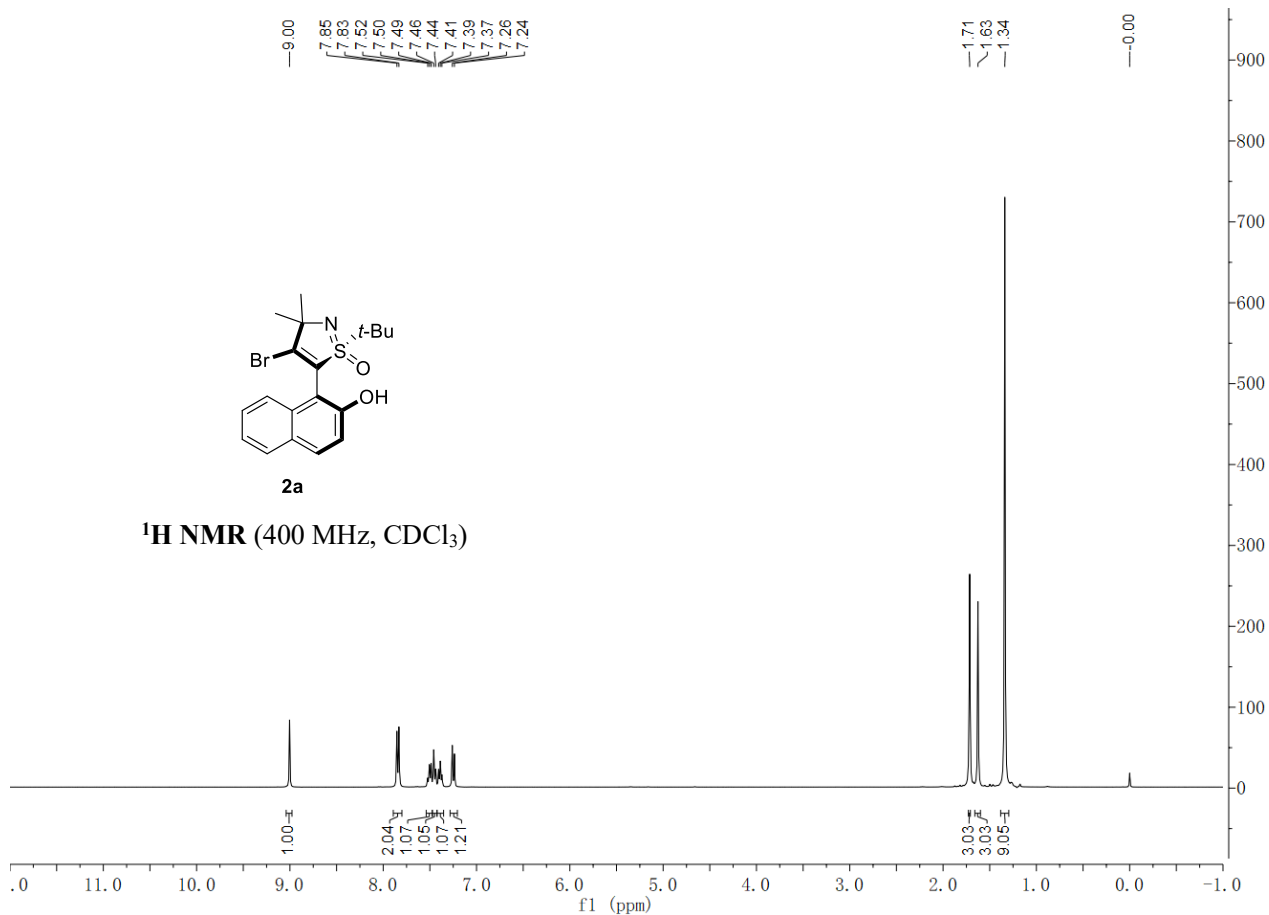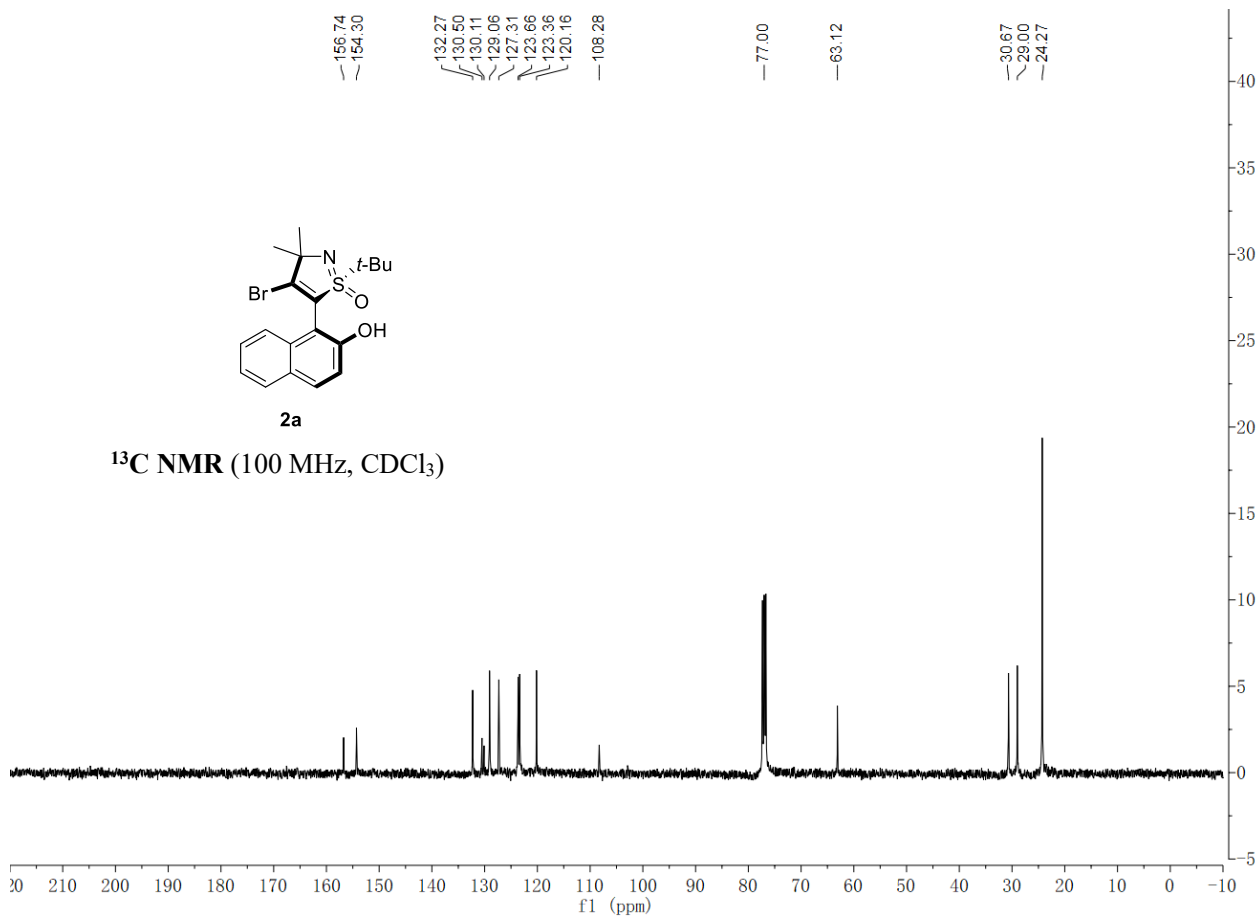

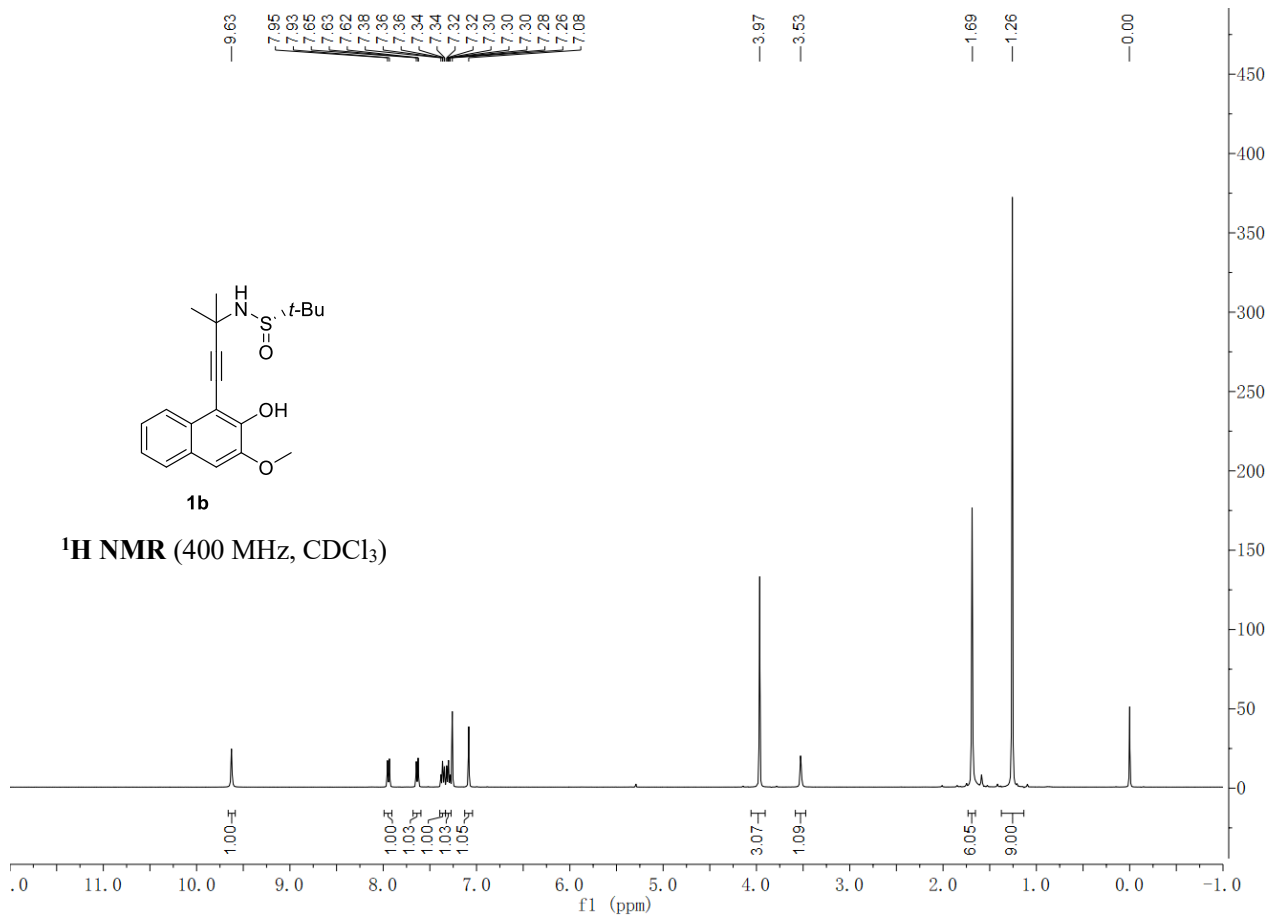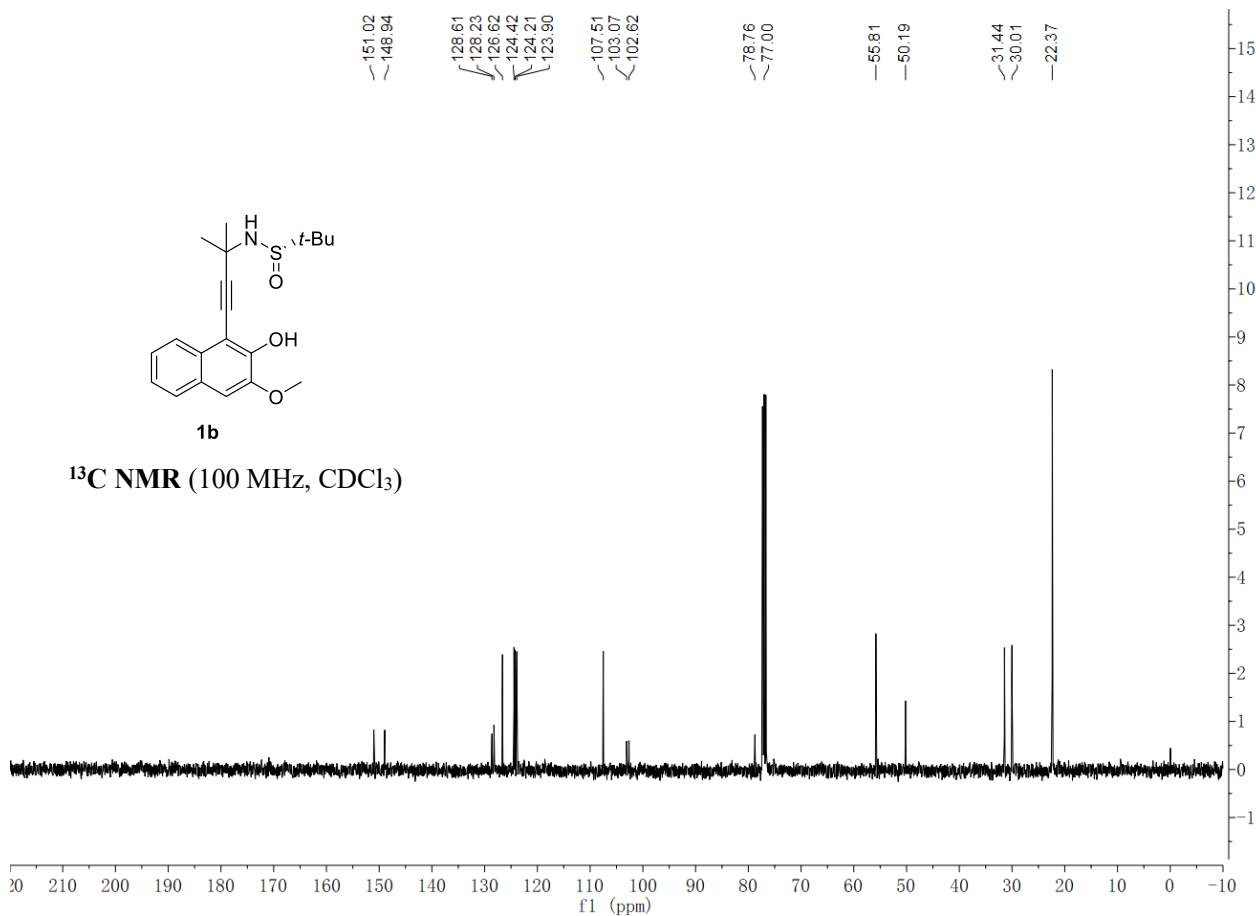

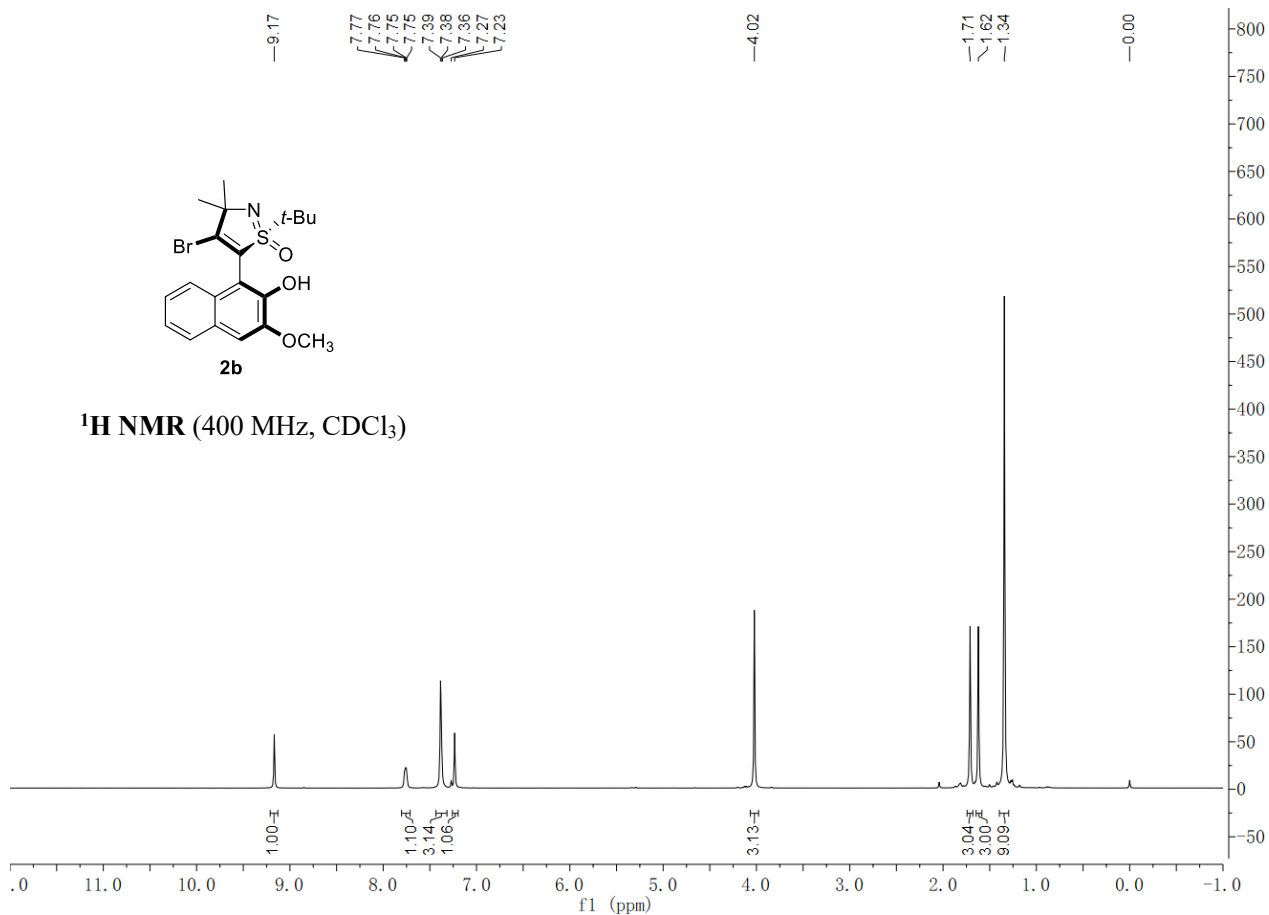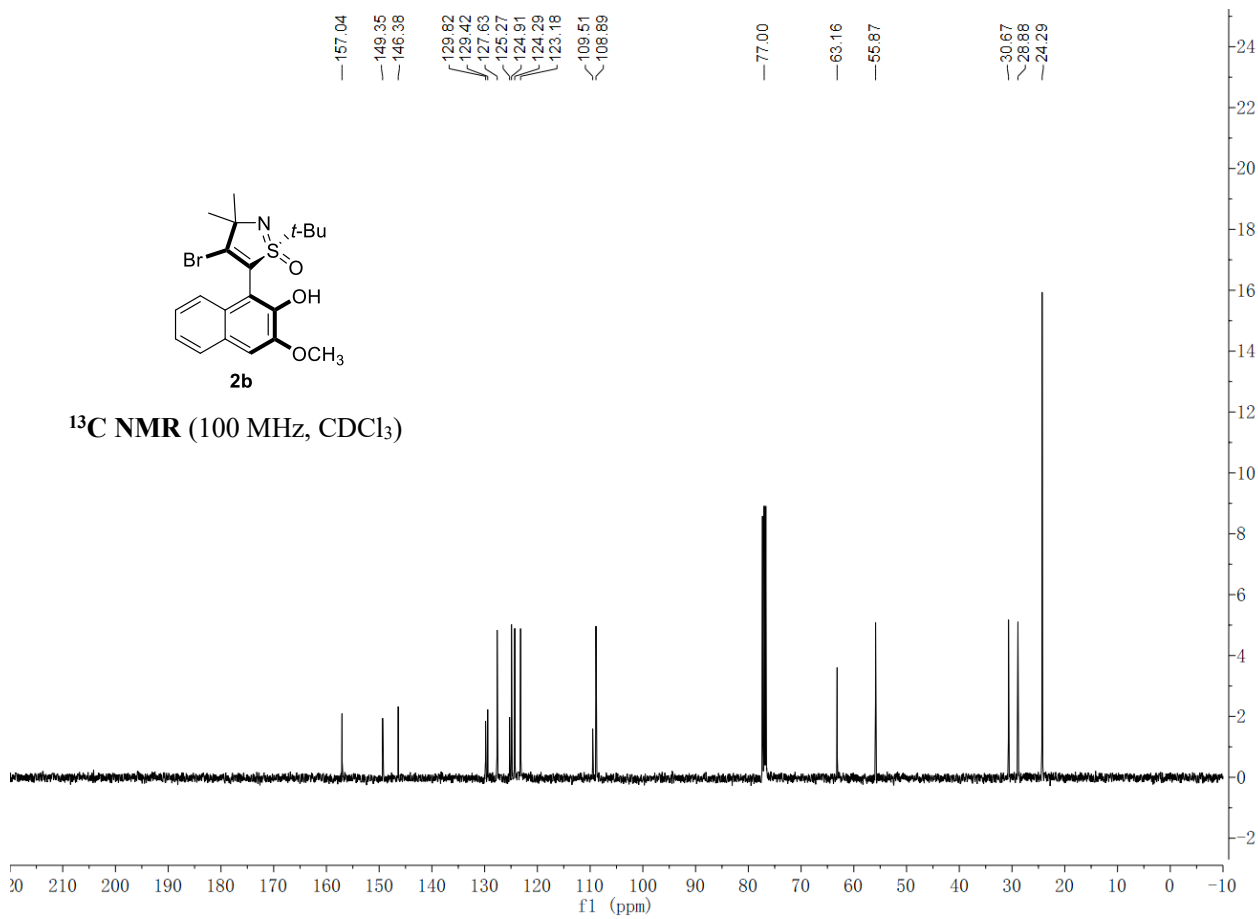

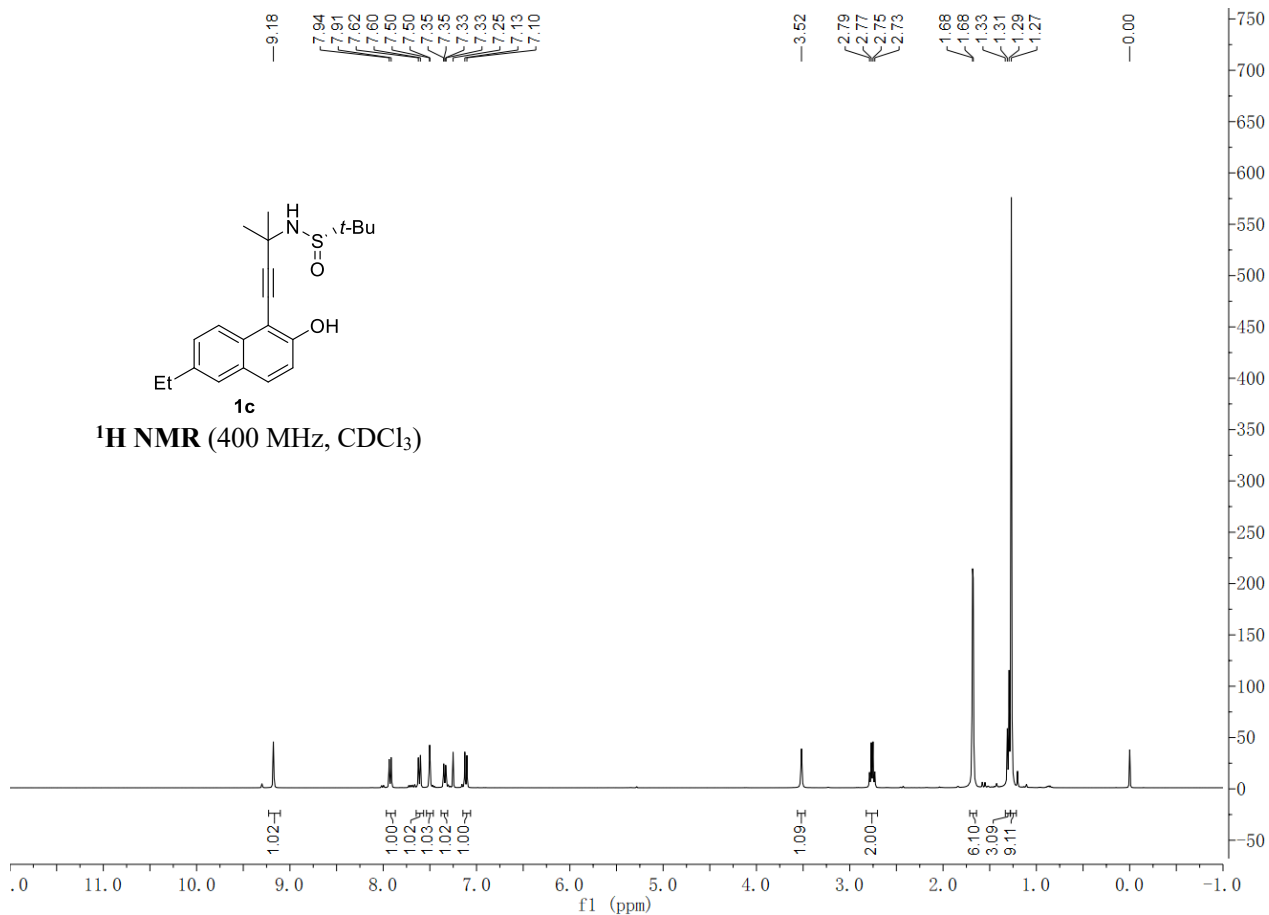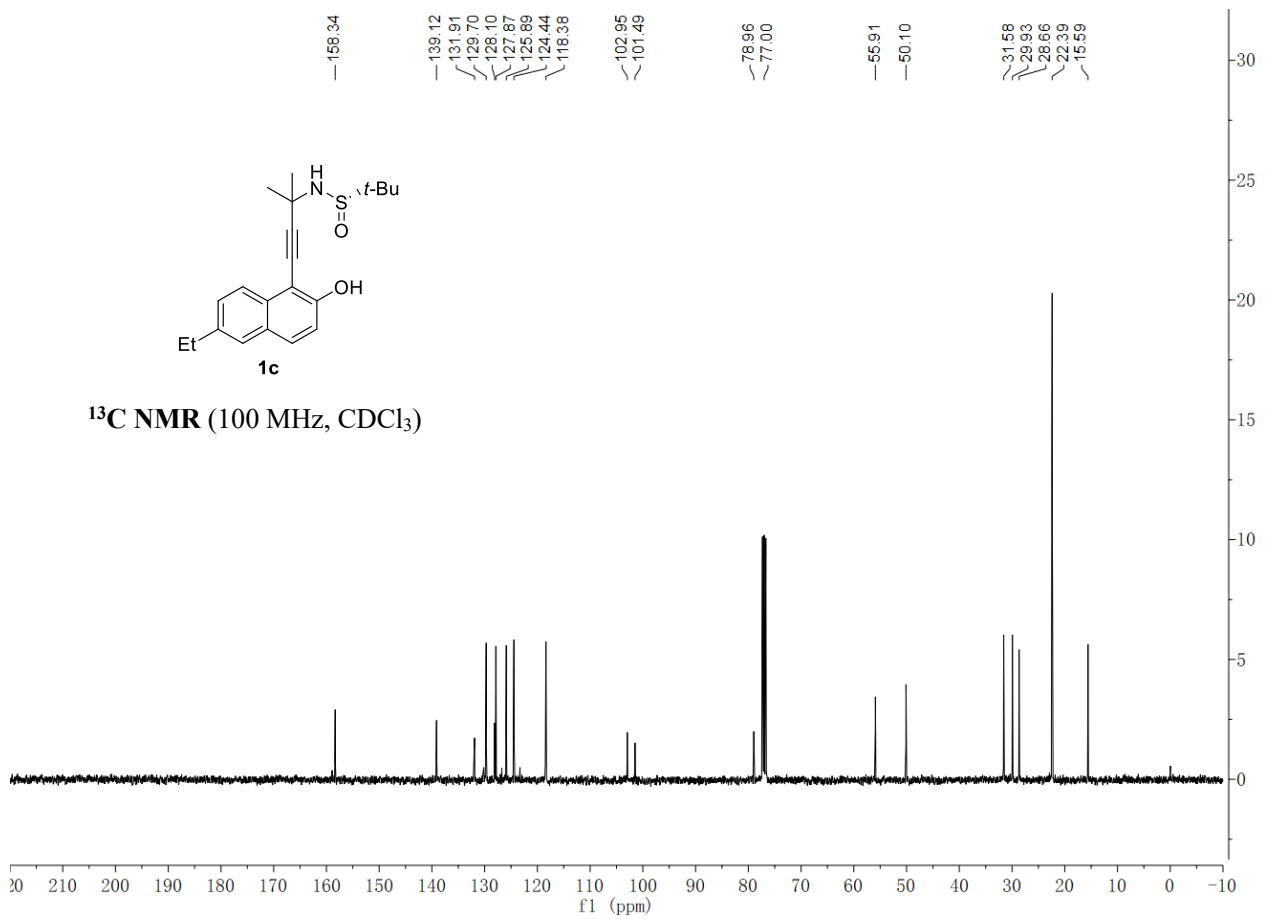

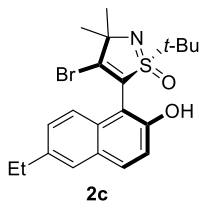

$^1\text{H NMR}$  (400 MHz,  $\text{CDCl}_3$ )

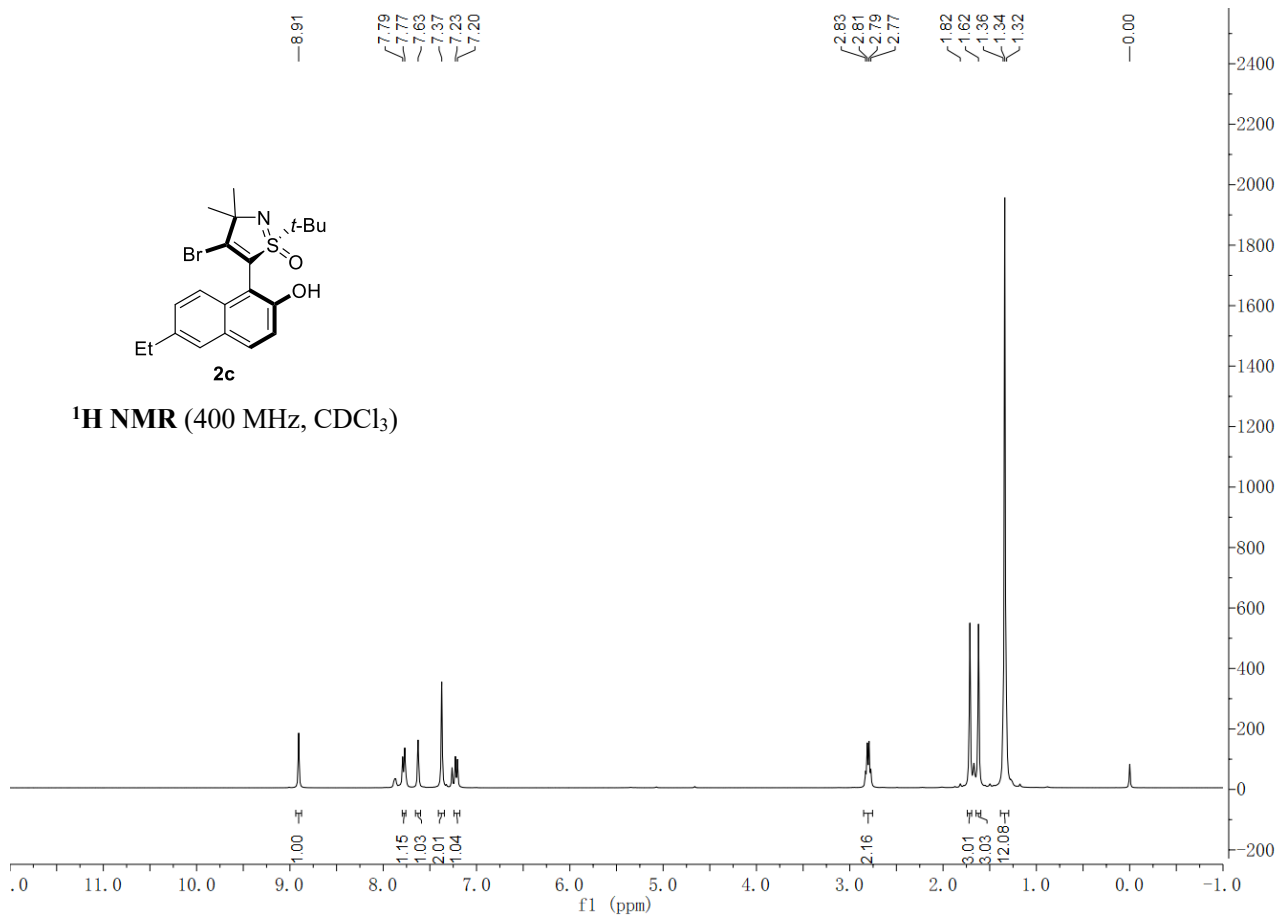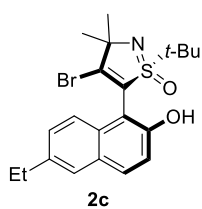

$^{13}\text{C NMR}$  (100 MHz,  $\text{CDCl}_3$ )

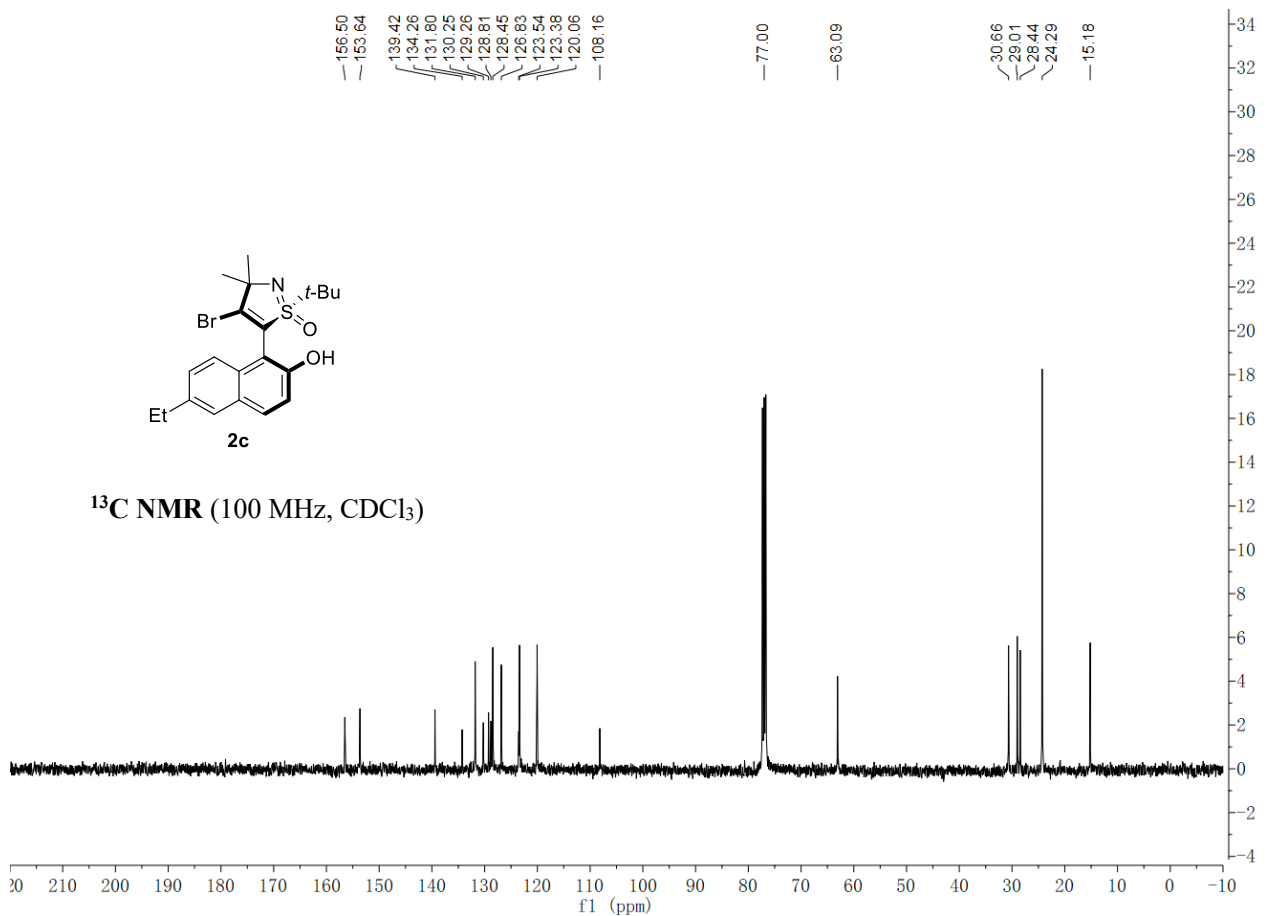

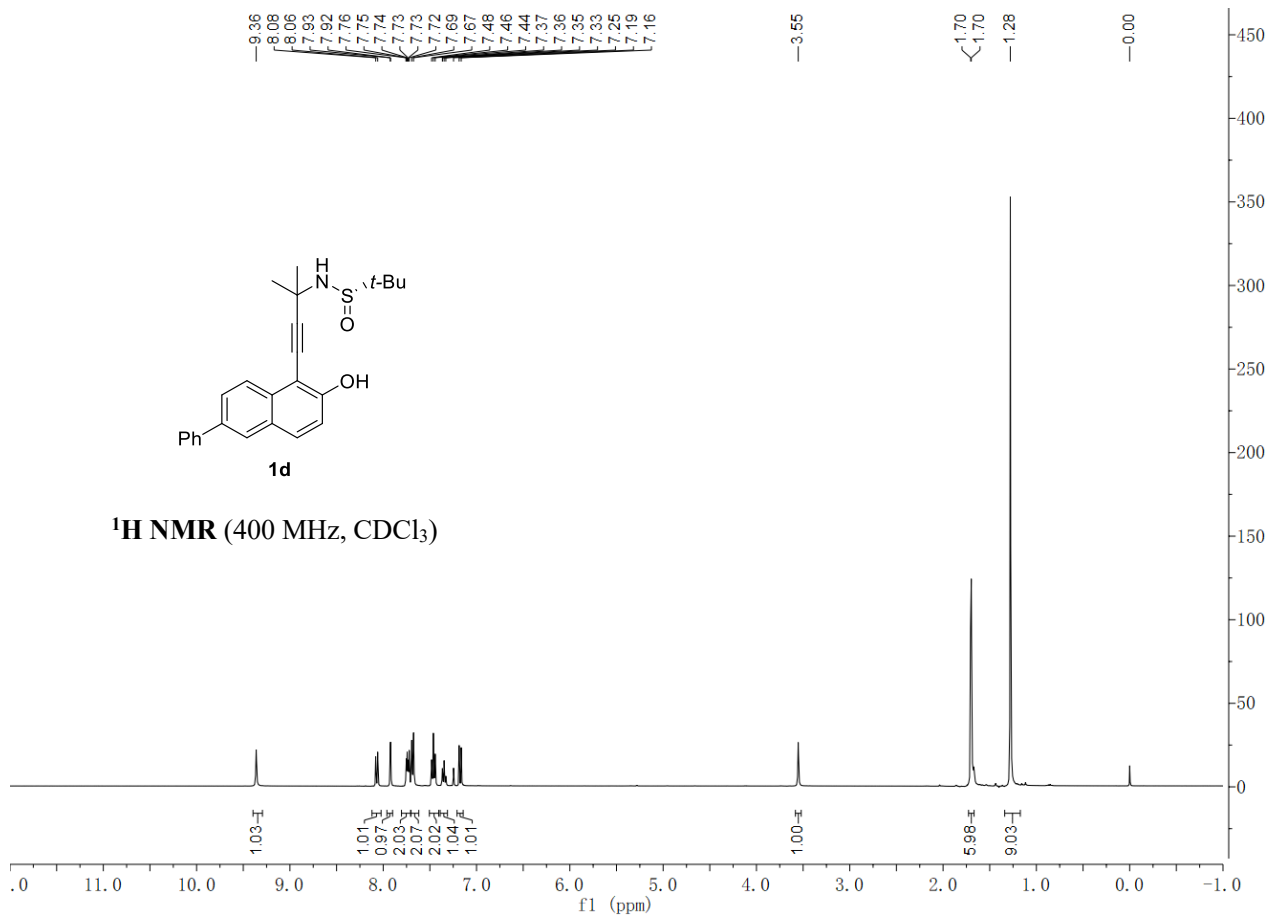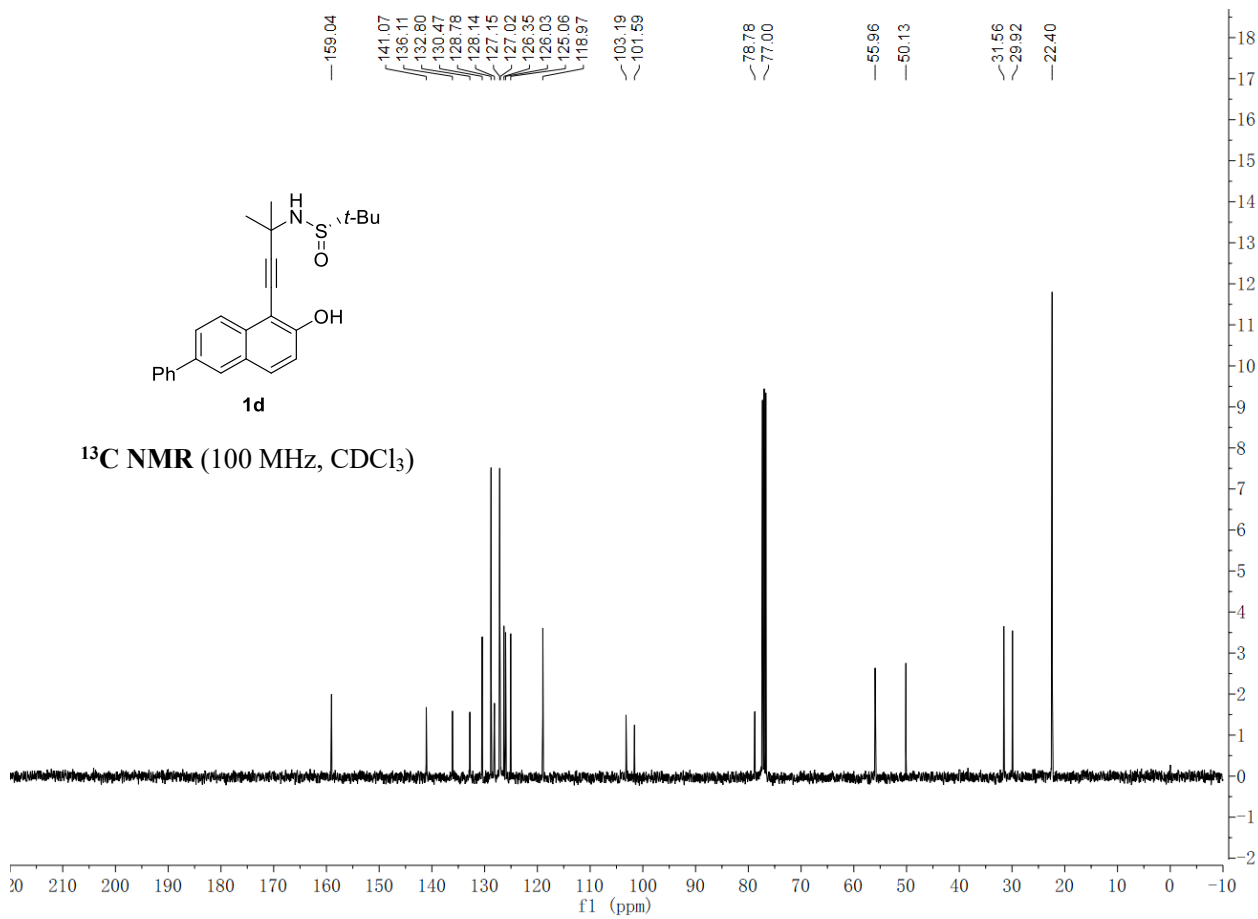



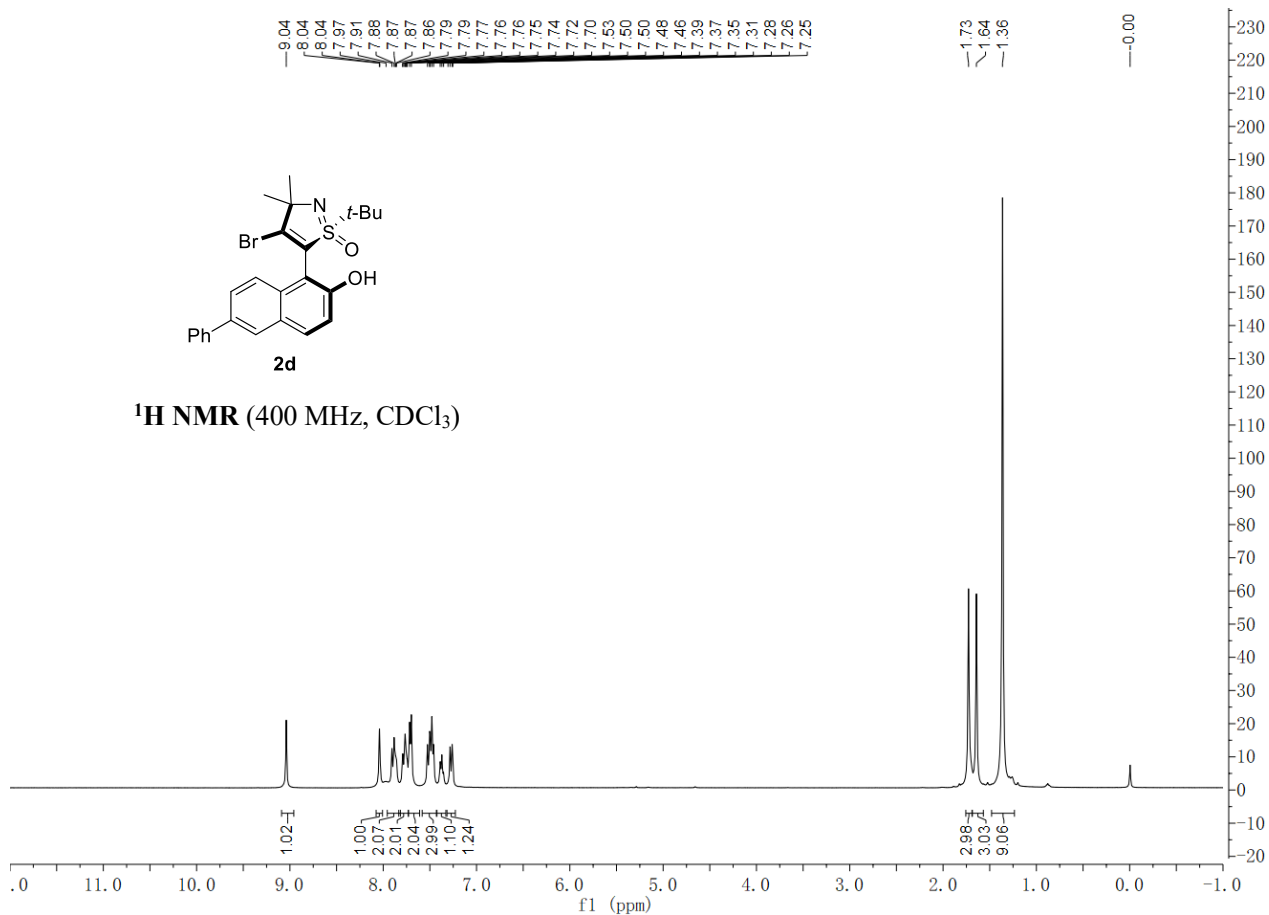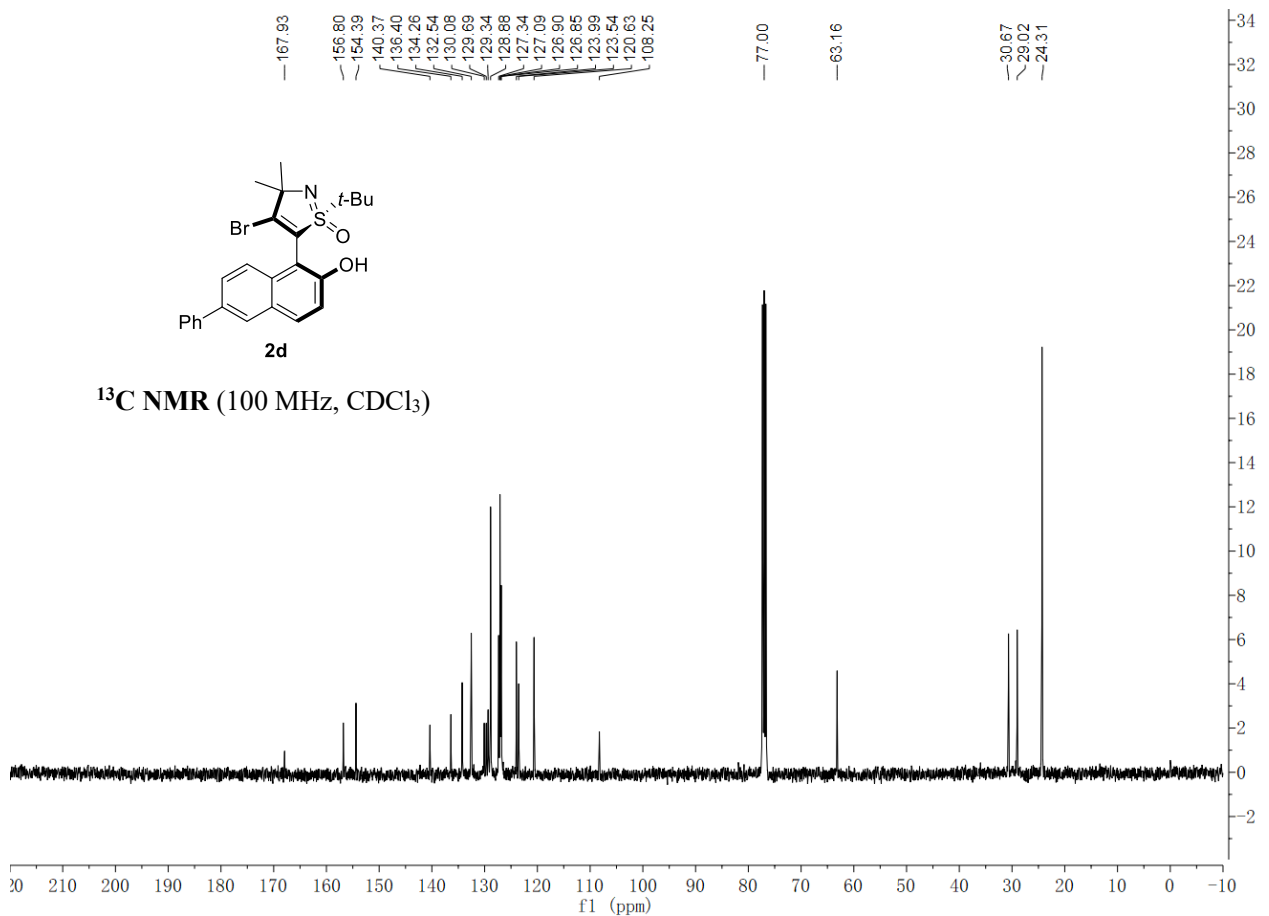

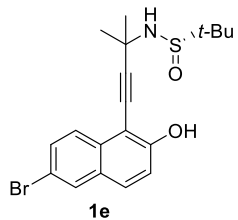

$^1\text{H NMR}$  (400 MHz,  $\text{CDCl}_3$ )

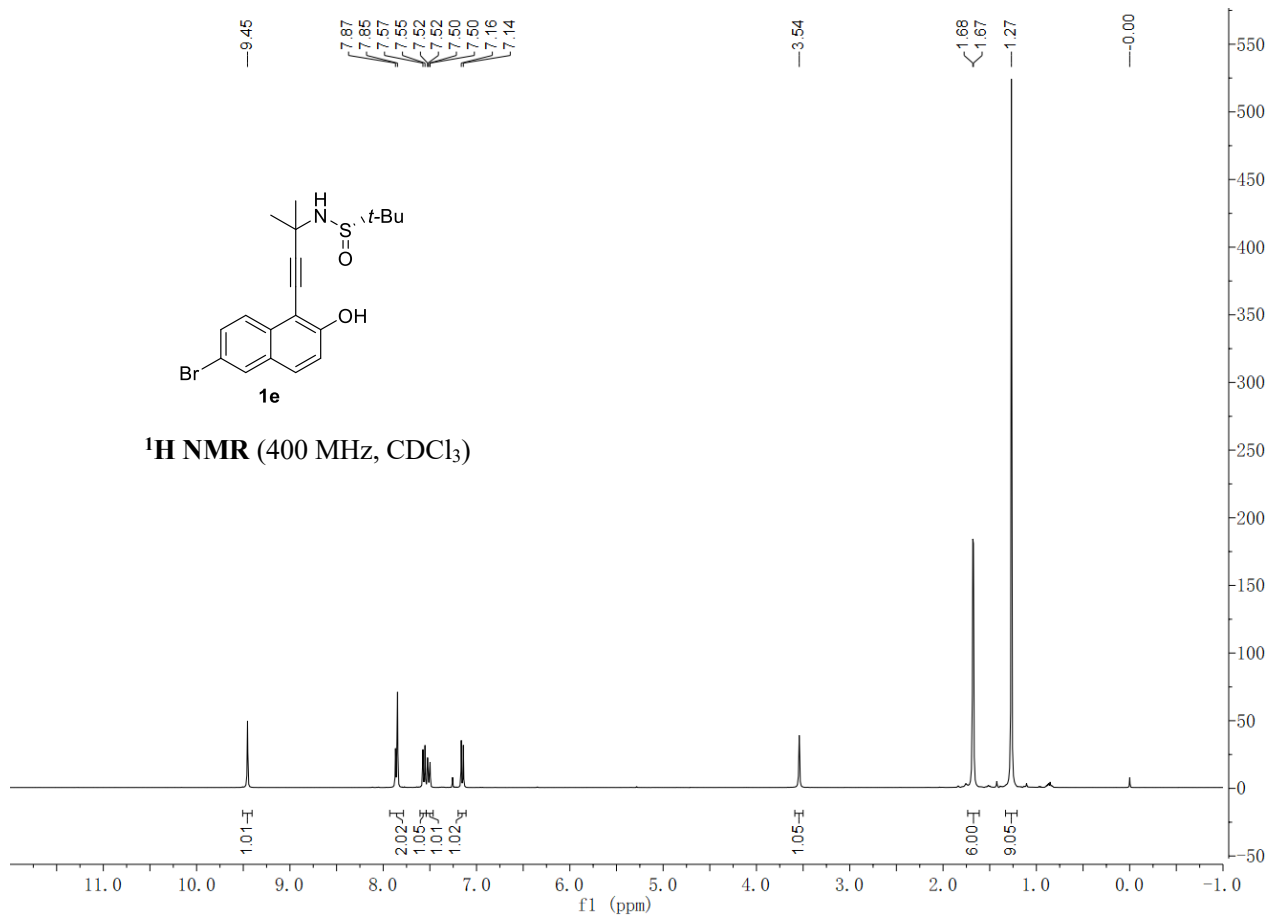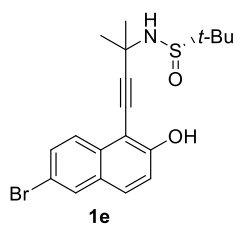

$^{13}\text{C NMR}$  (100 MHz,  $\text{CDCl}_3$ )

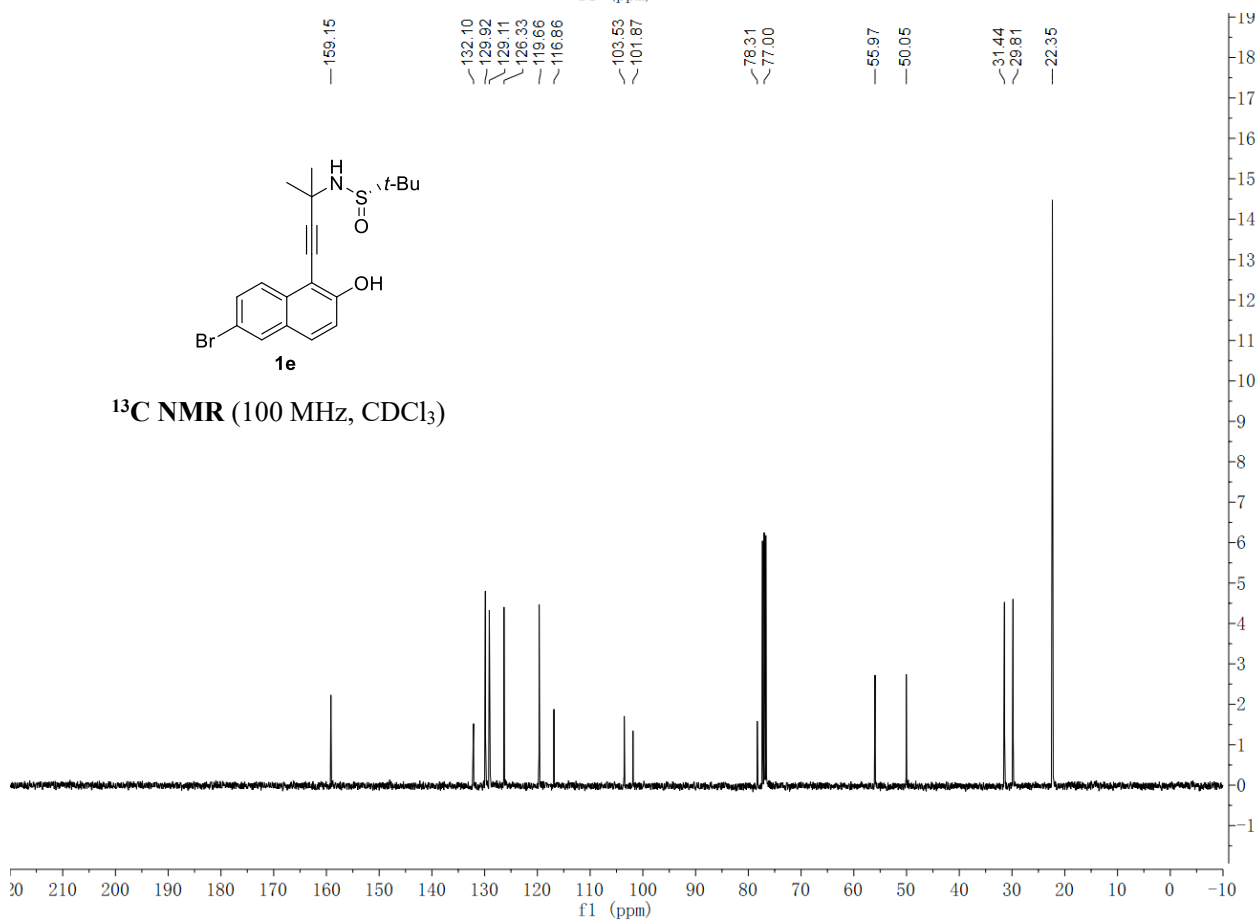

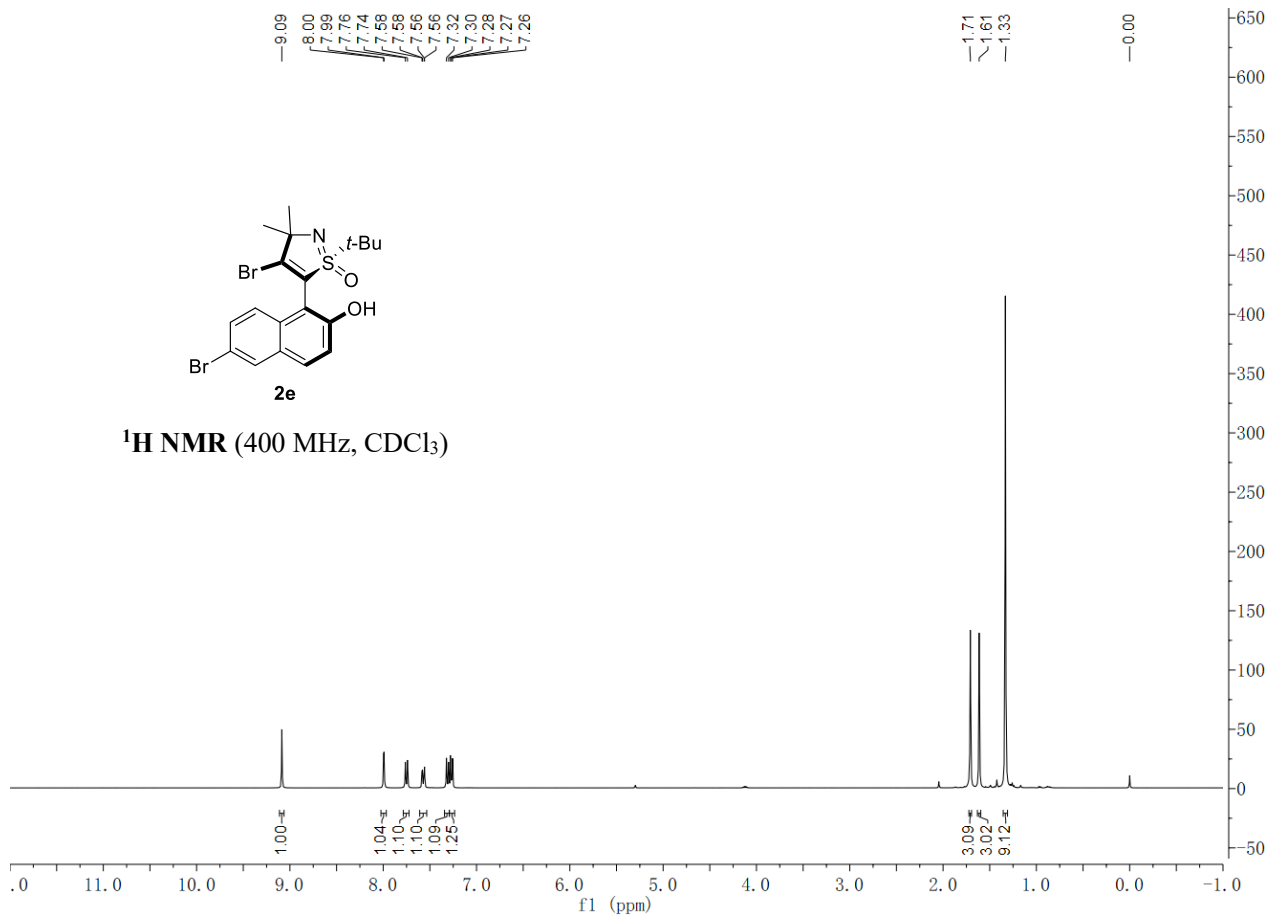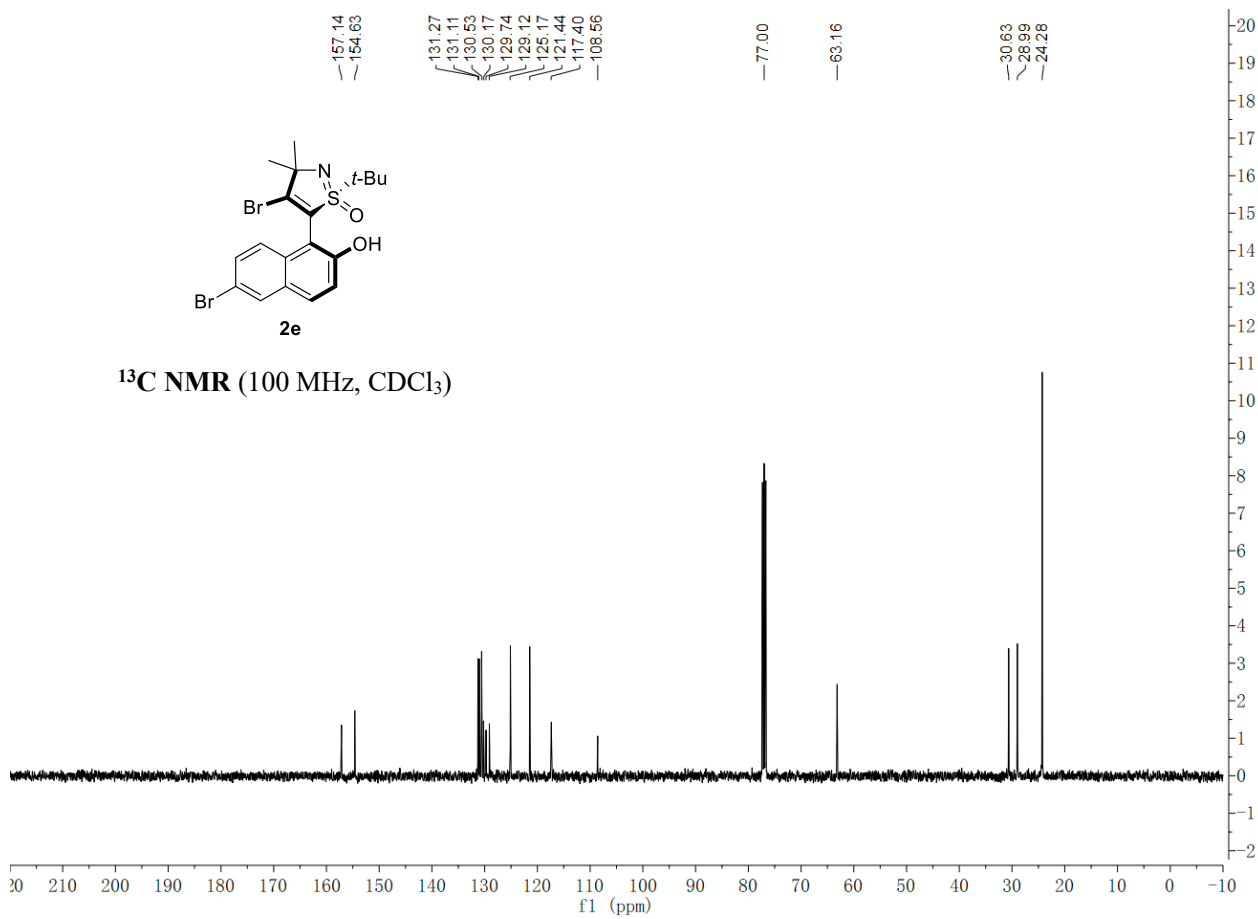

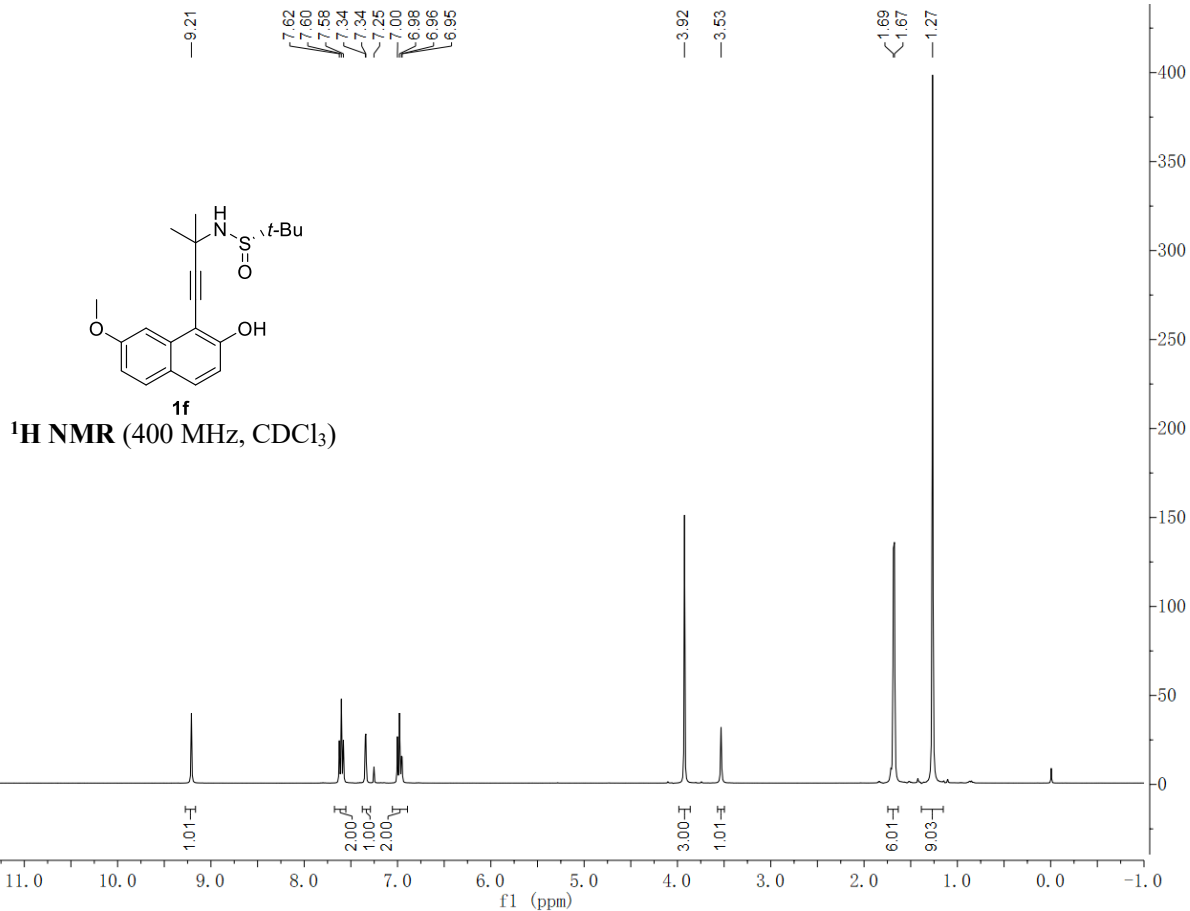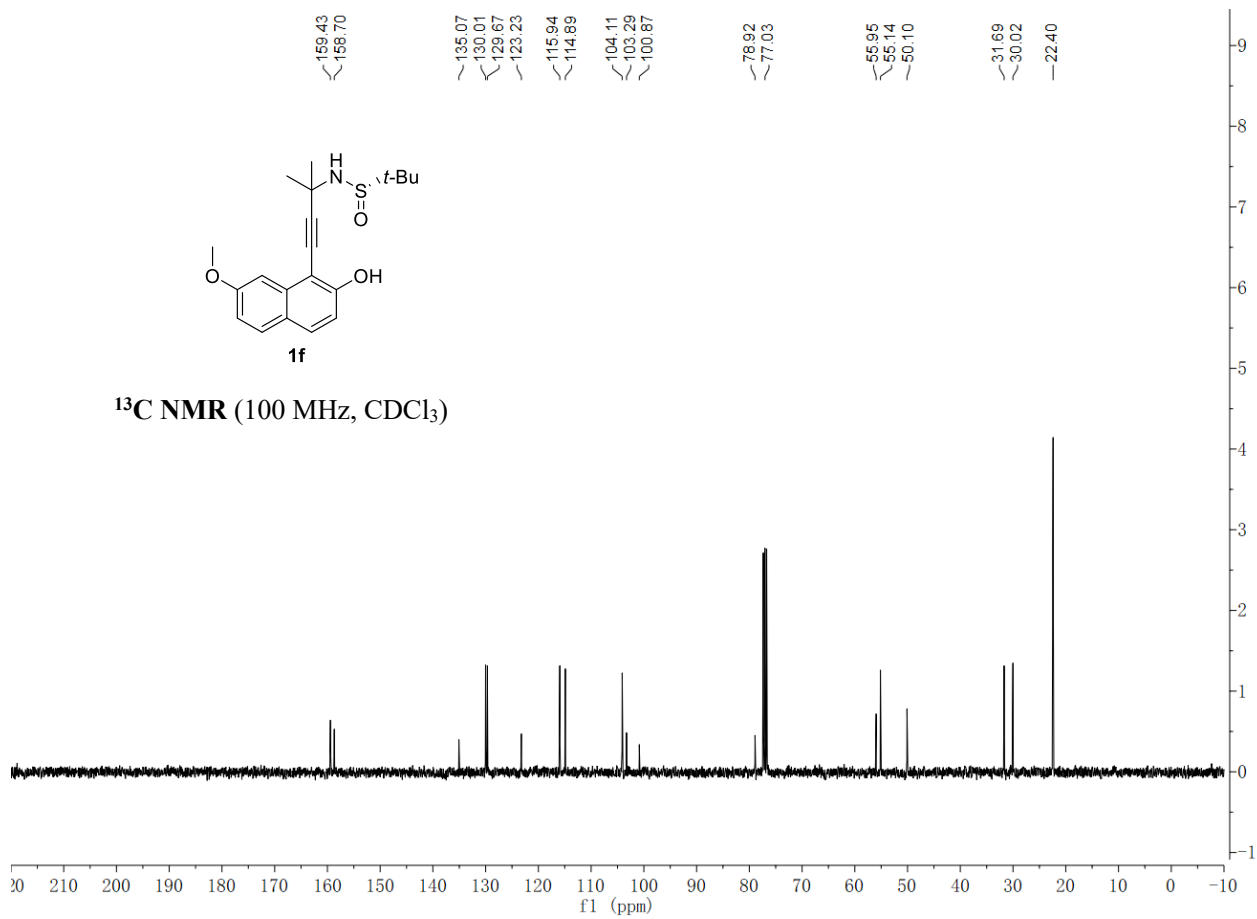

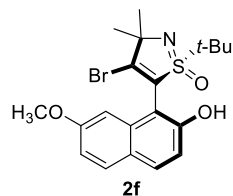

**<sup>1</sup>H NMR (400 MHz, CDCl<sub>3</sub>)**

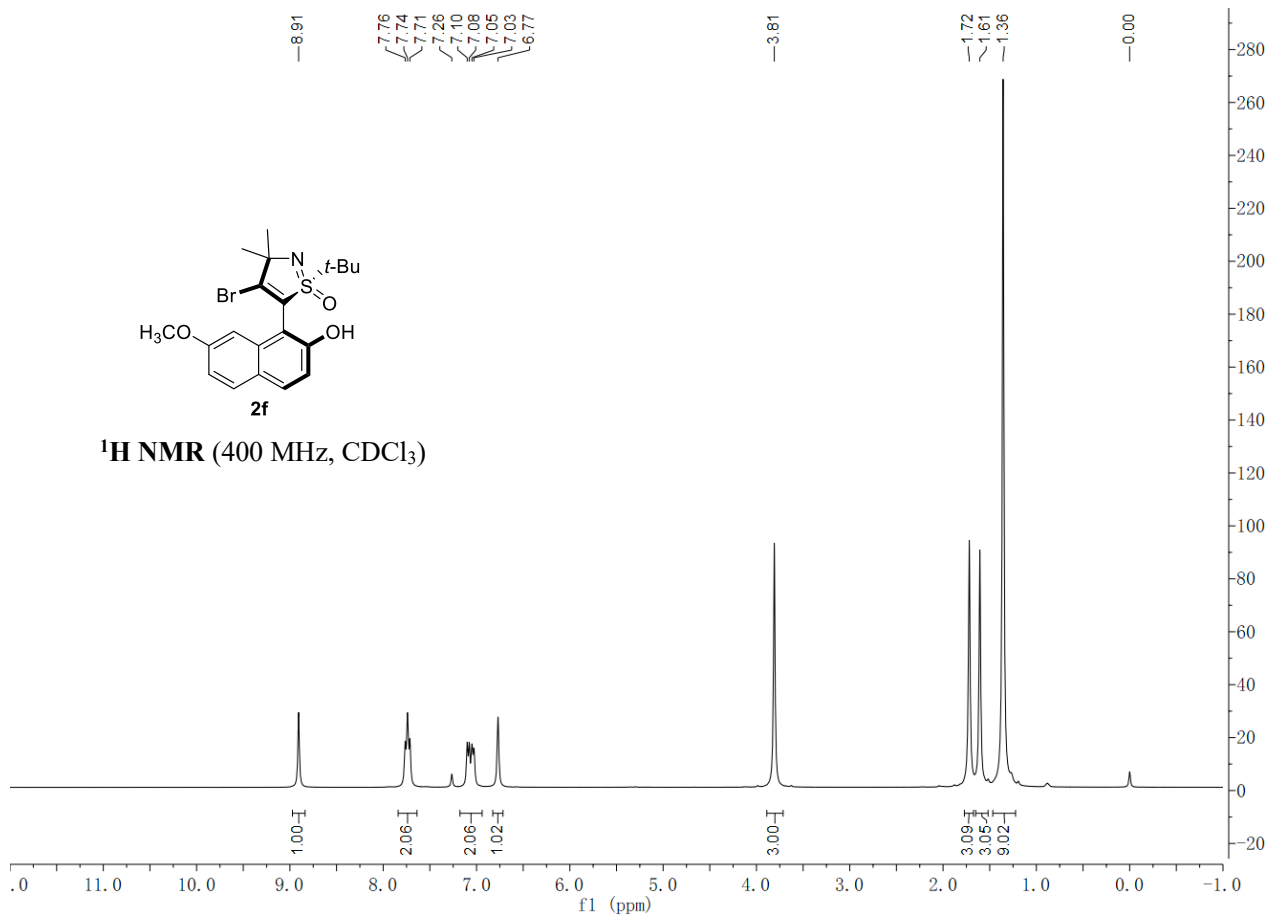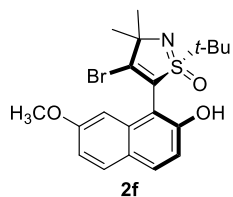

**<sup>13</sup>C NMR (100 MHz, CDCl<sub>3</sub>)**

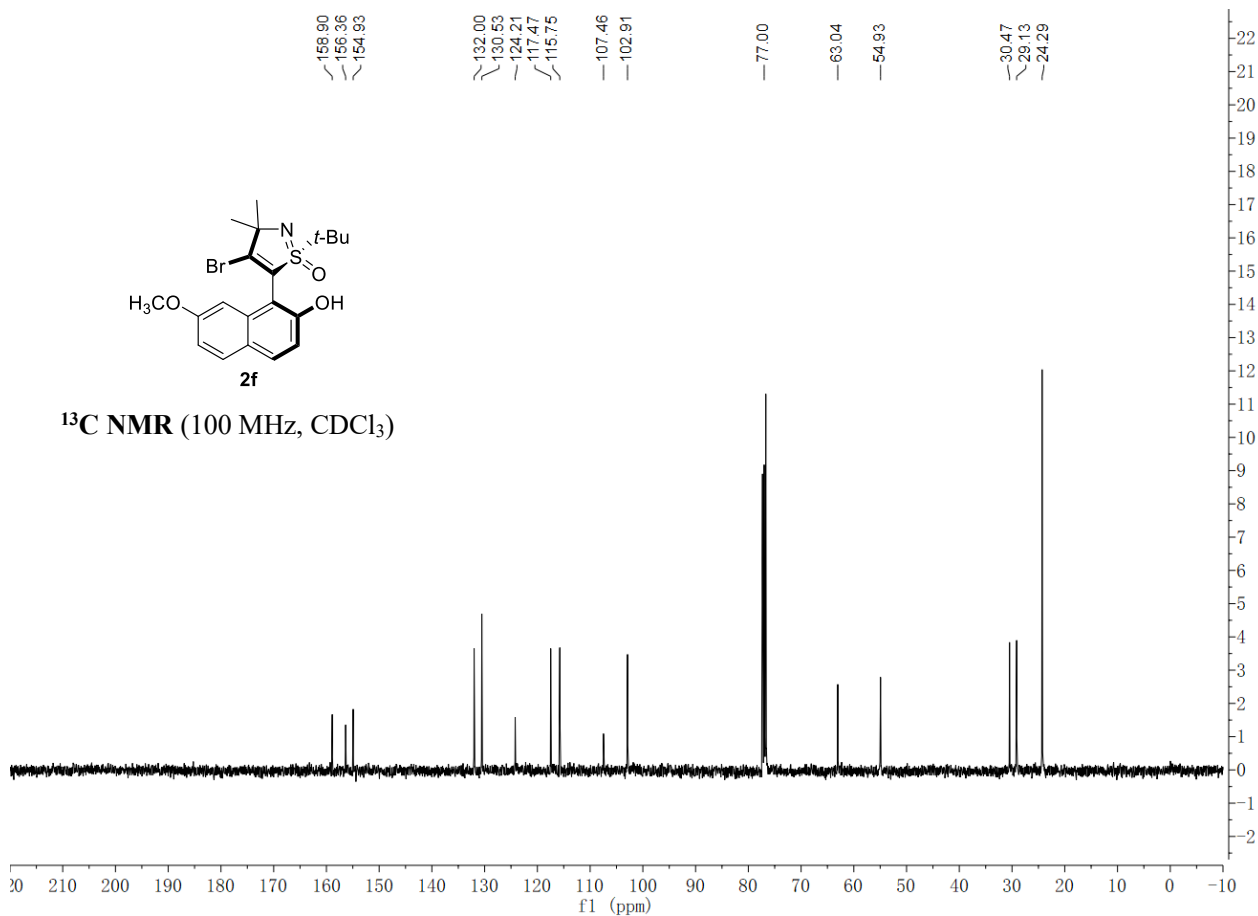

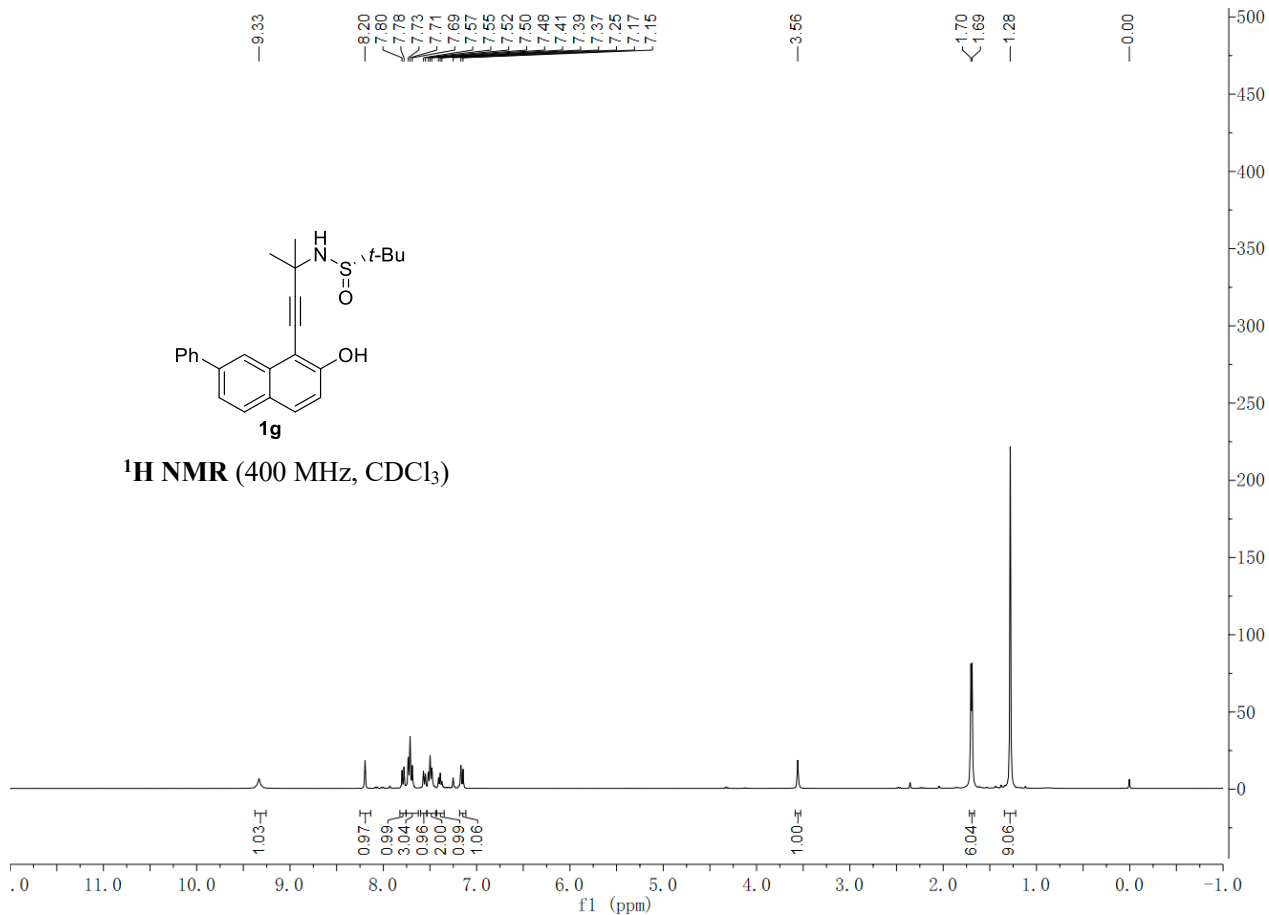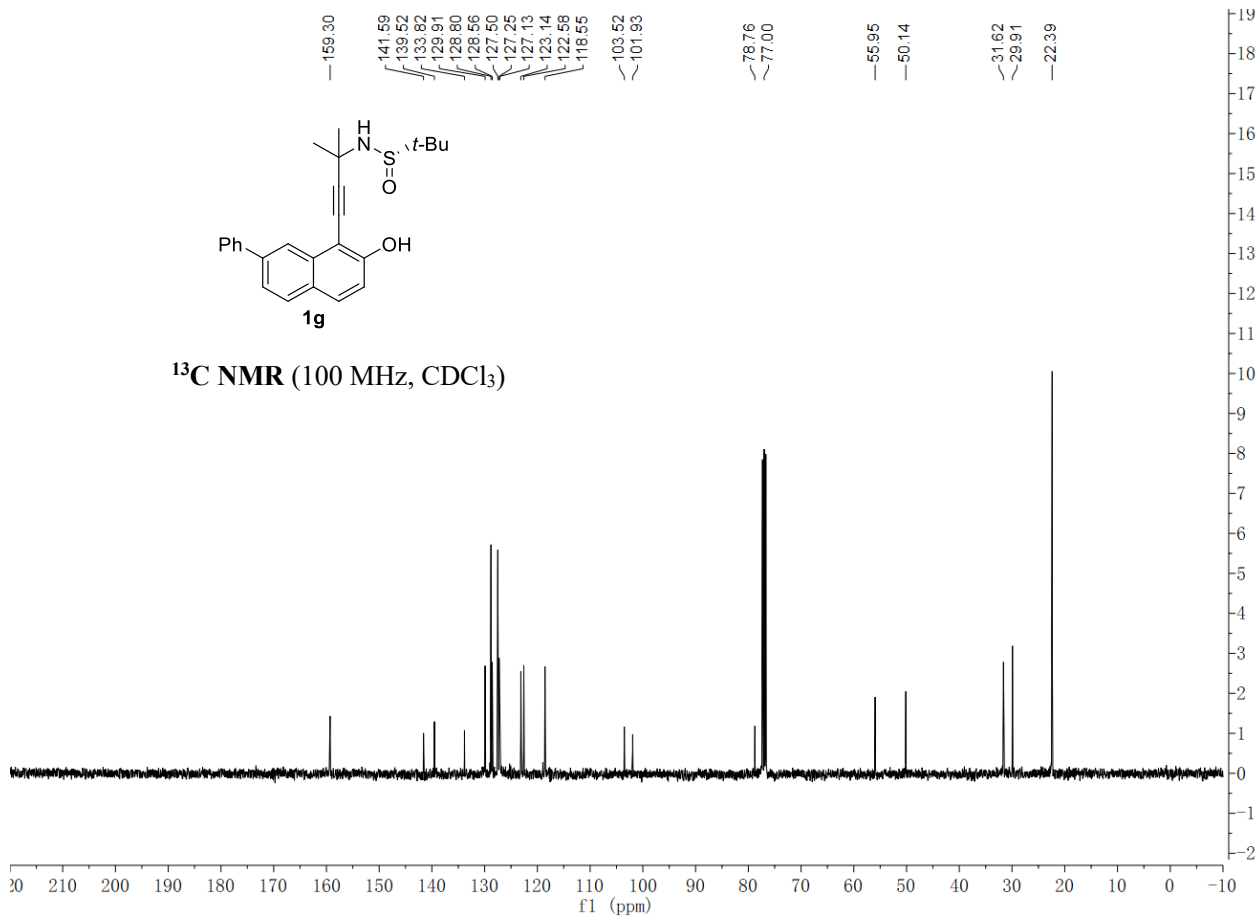

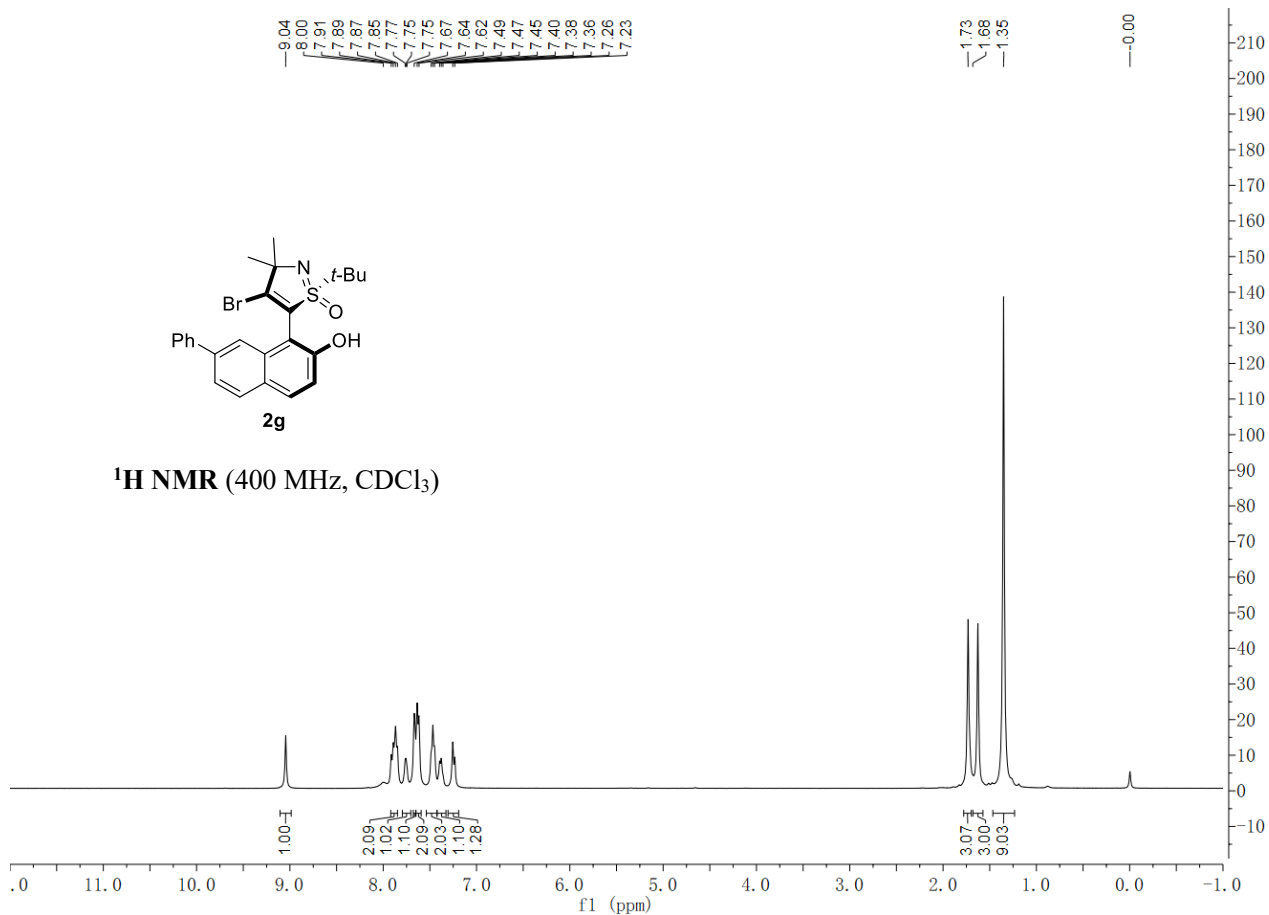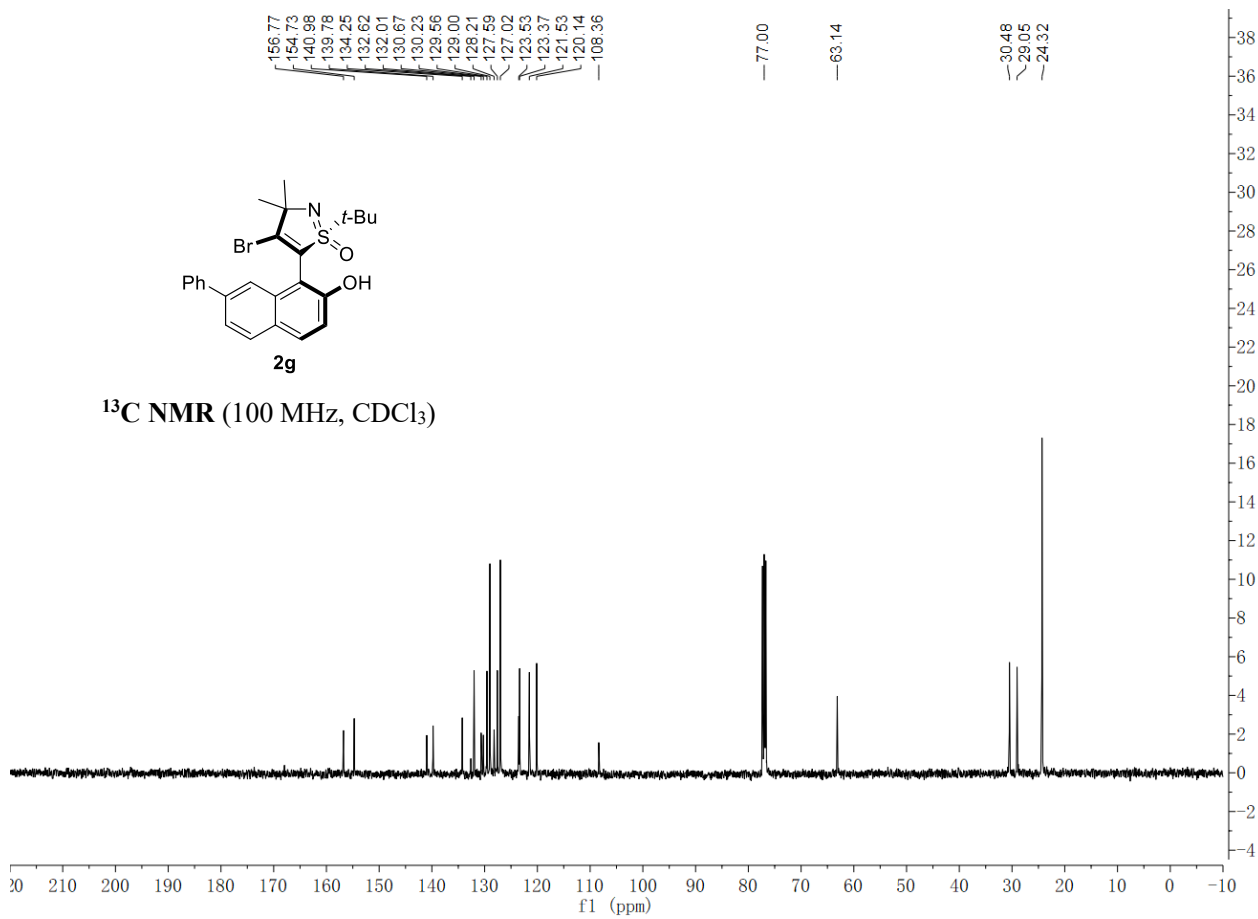

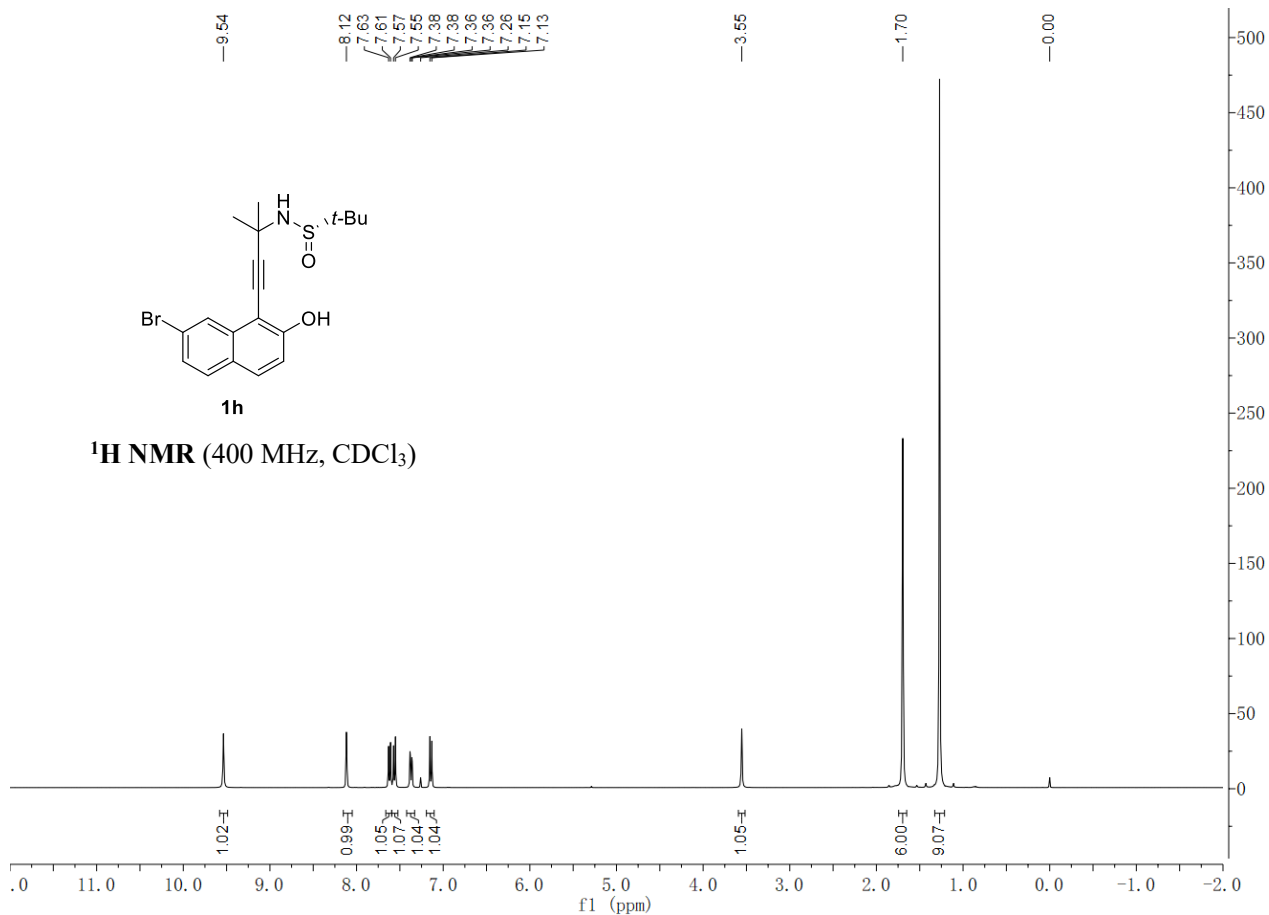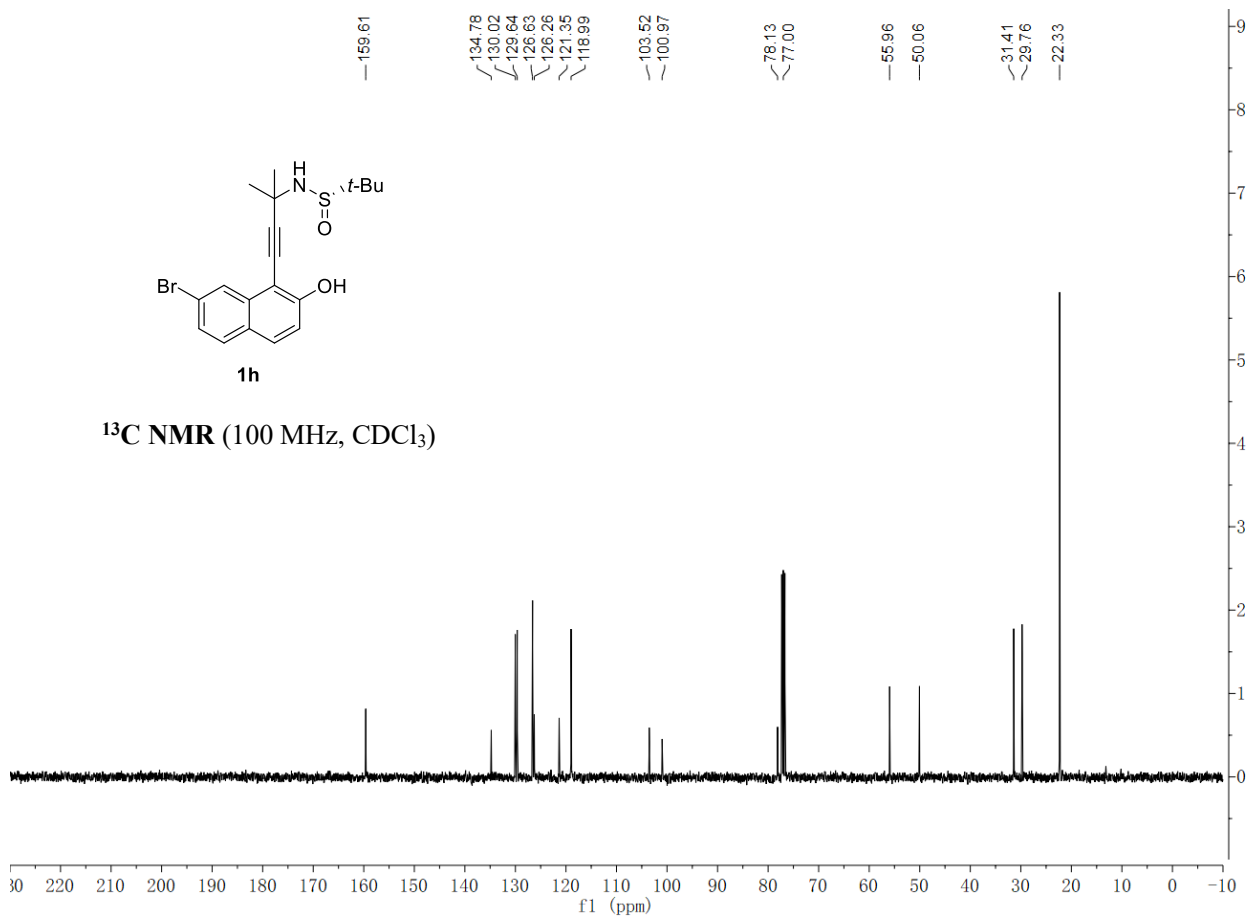



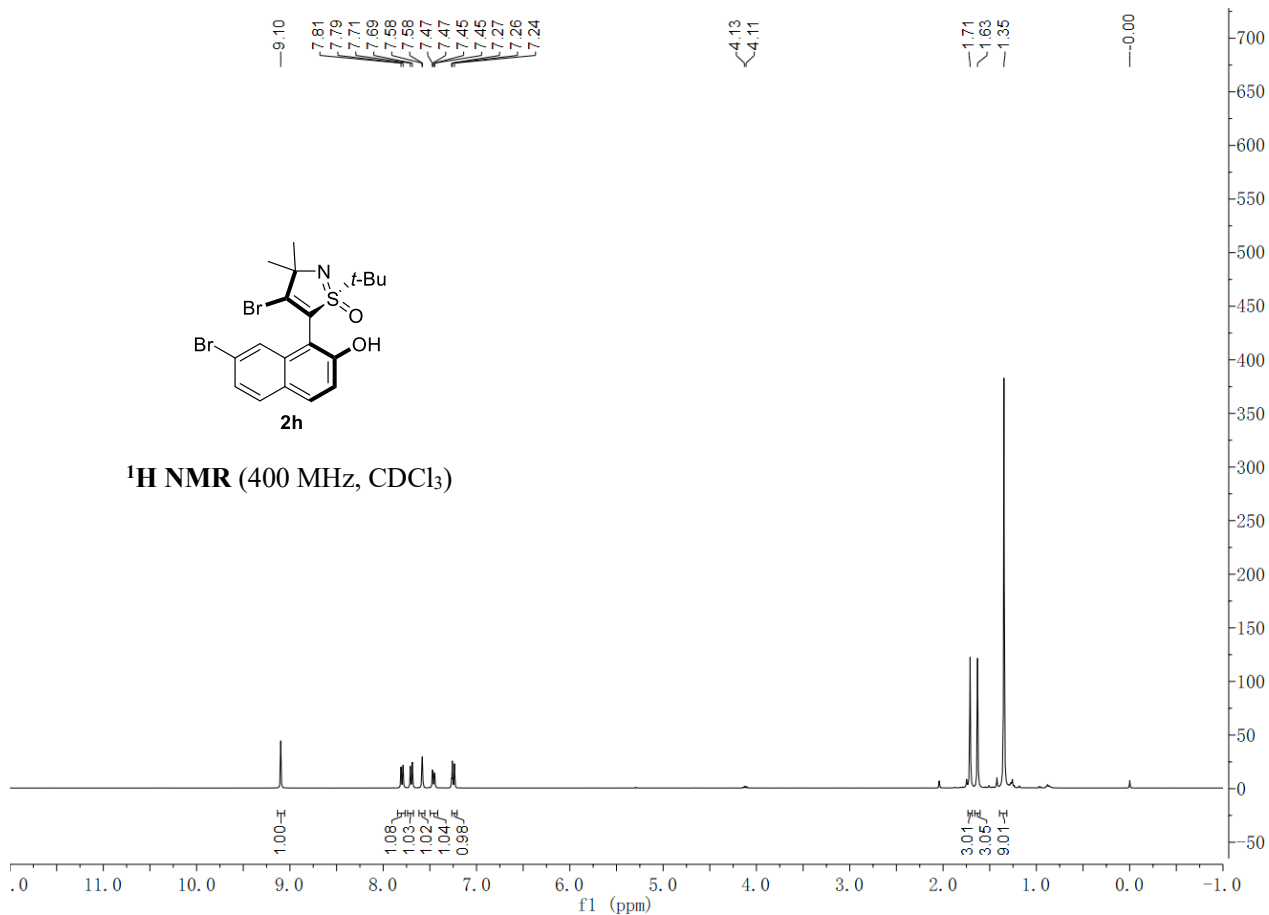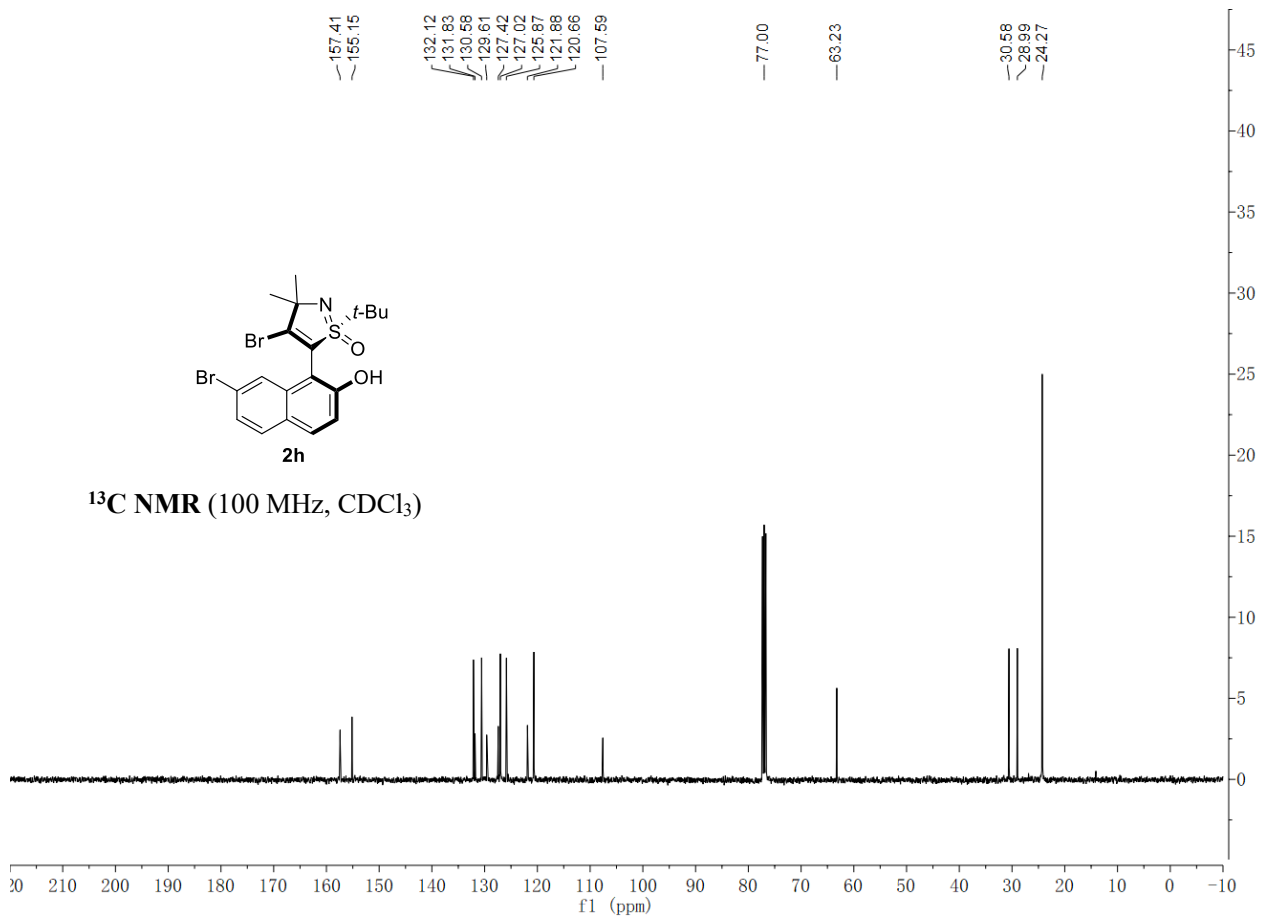

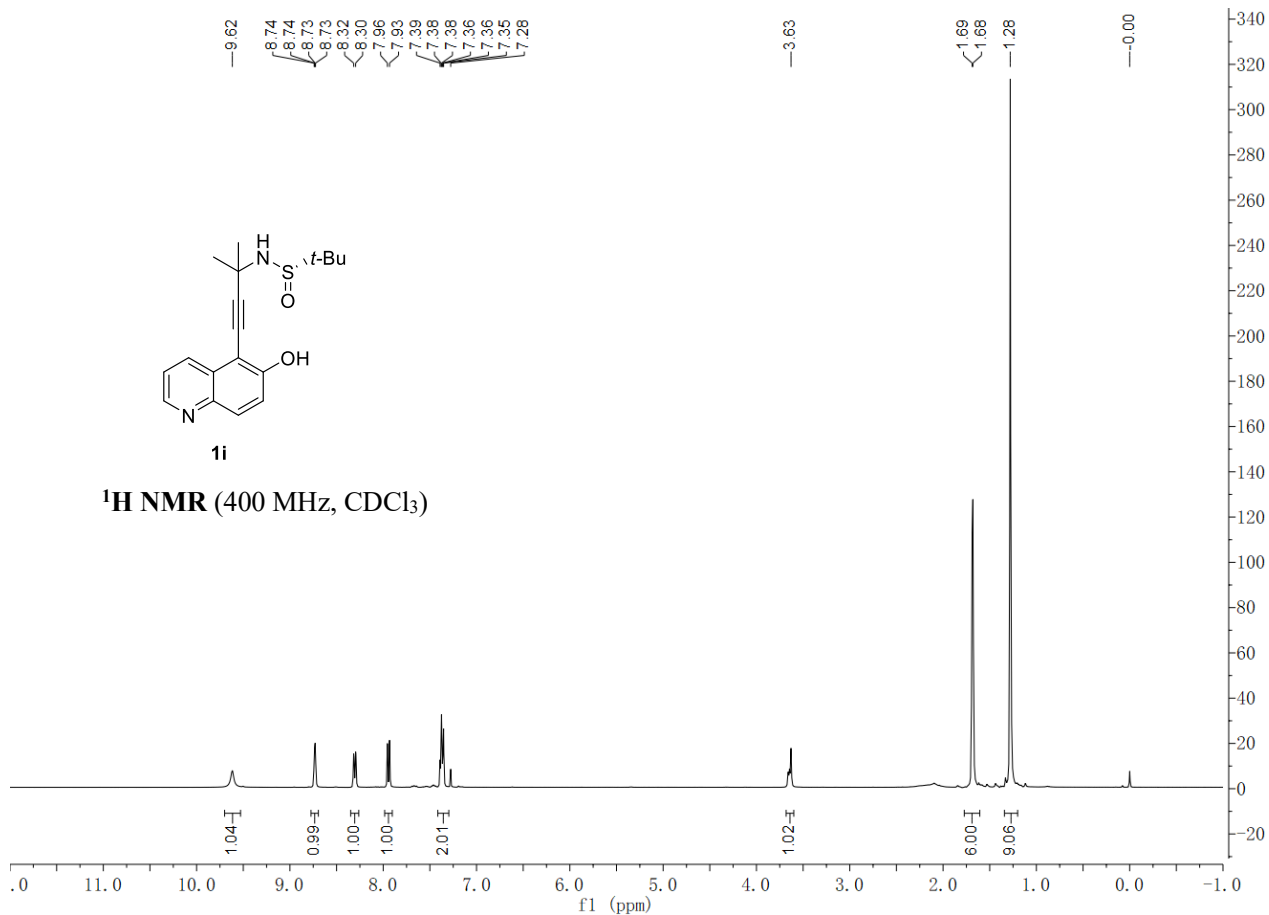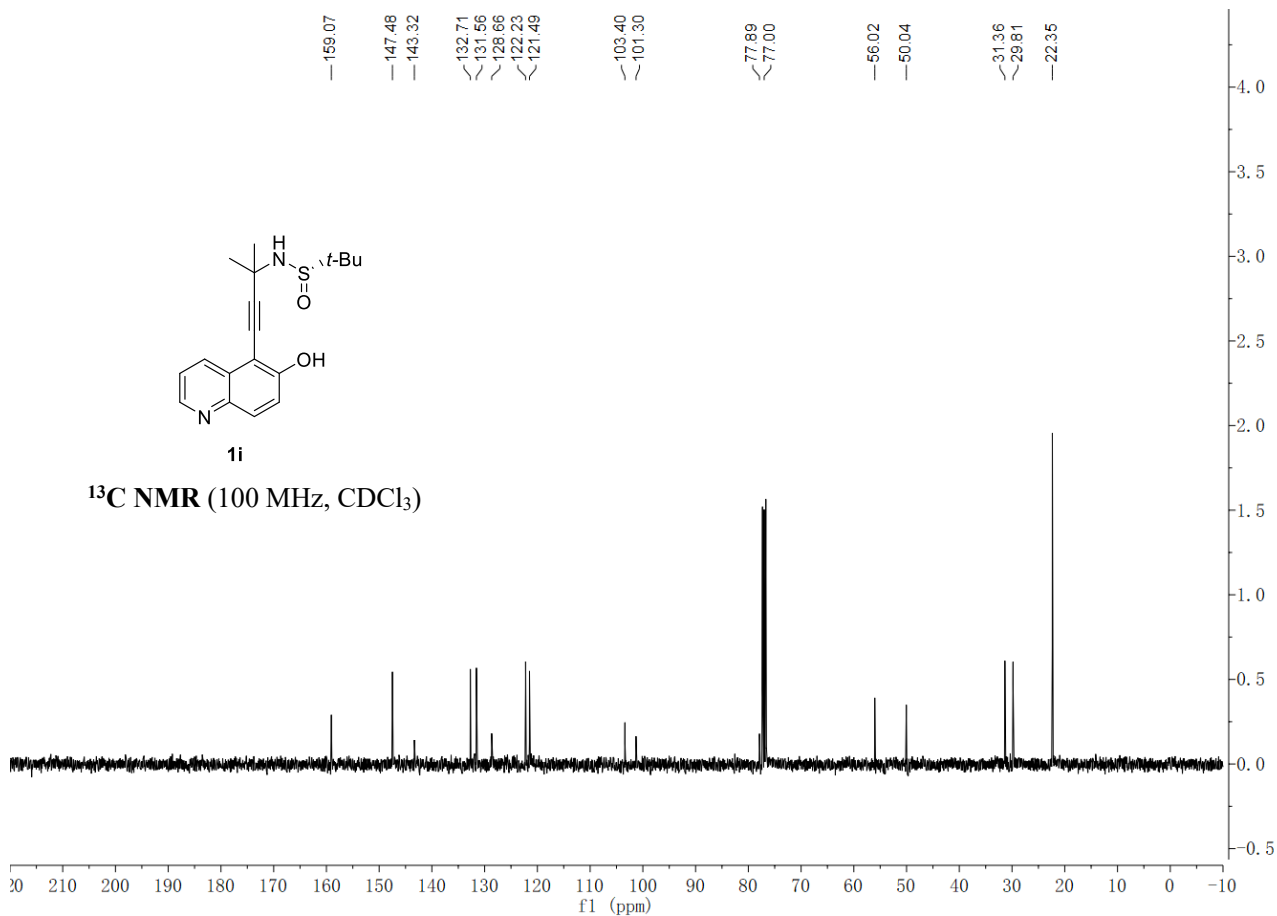

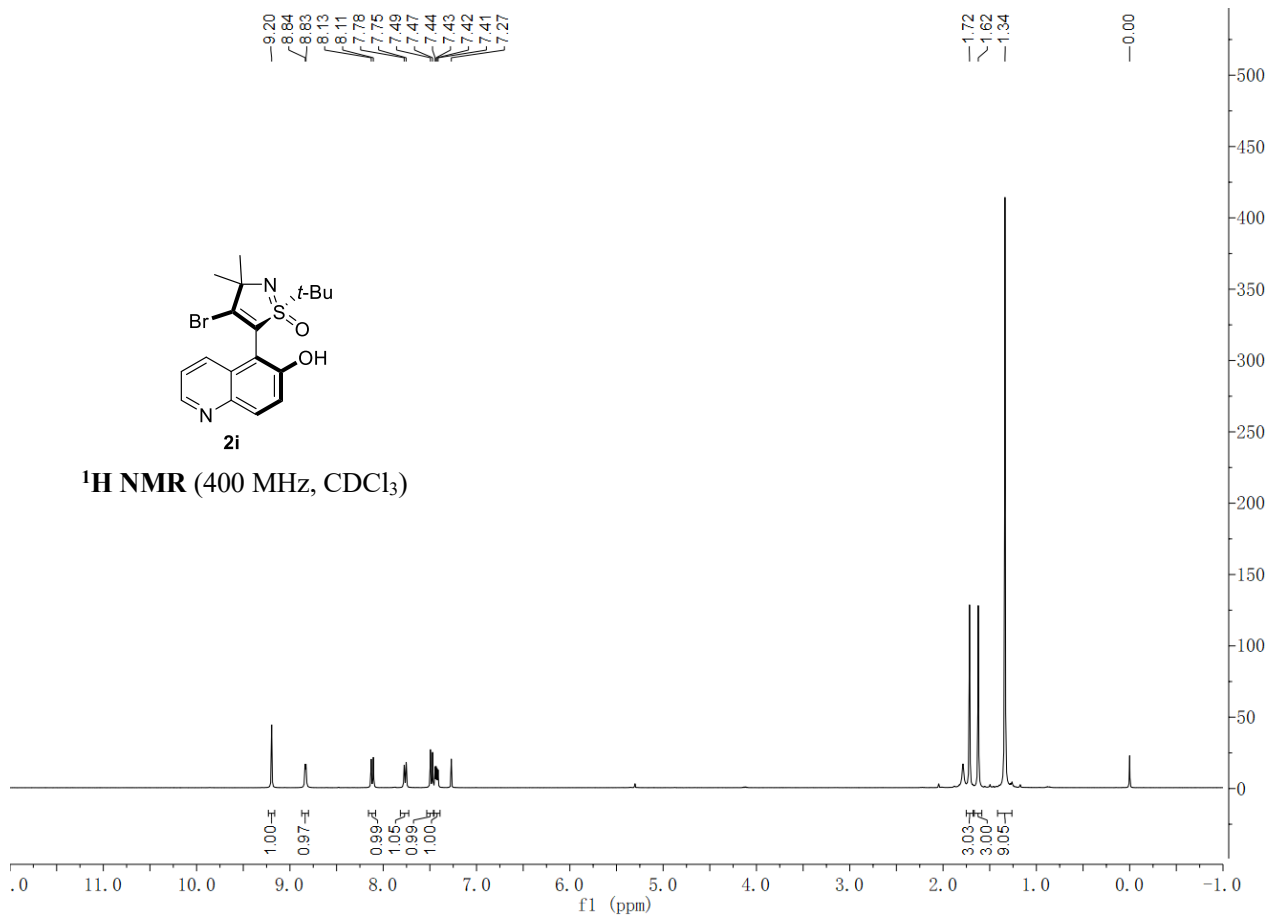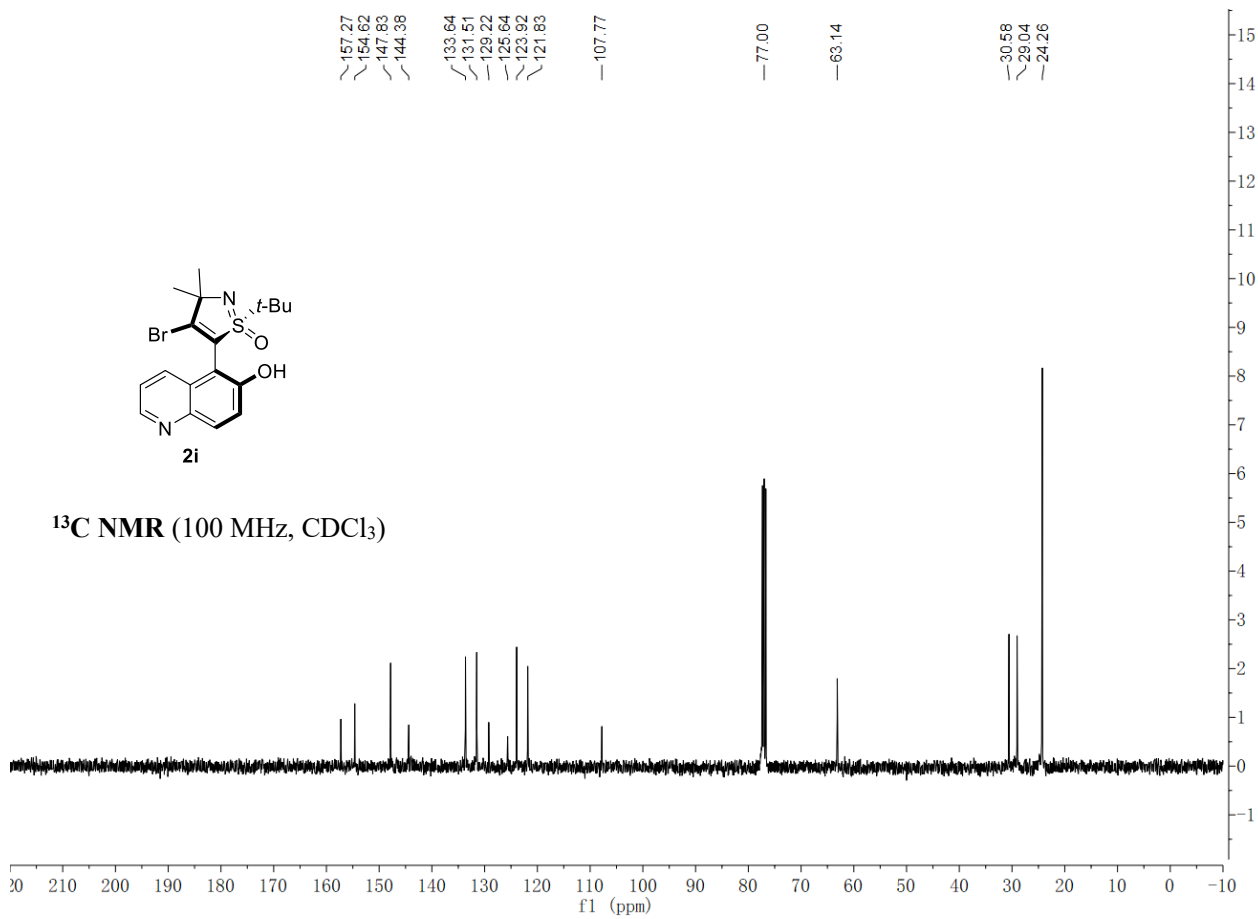

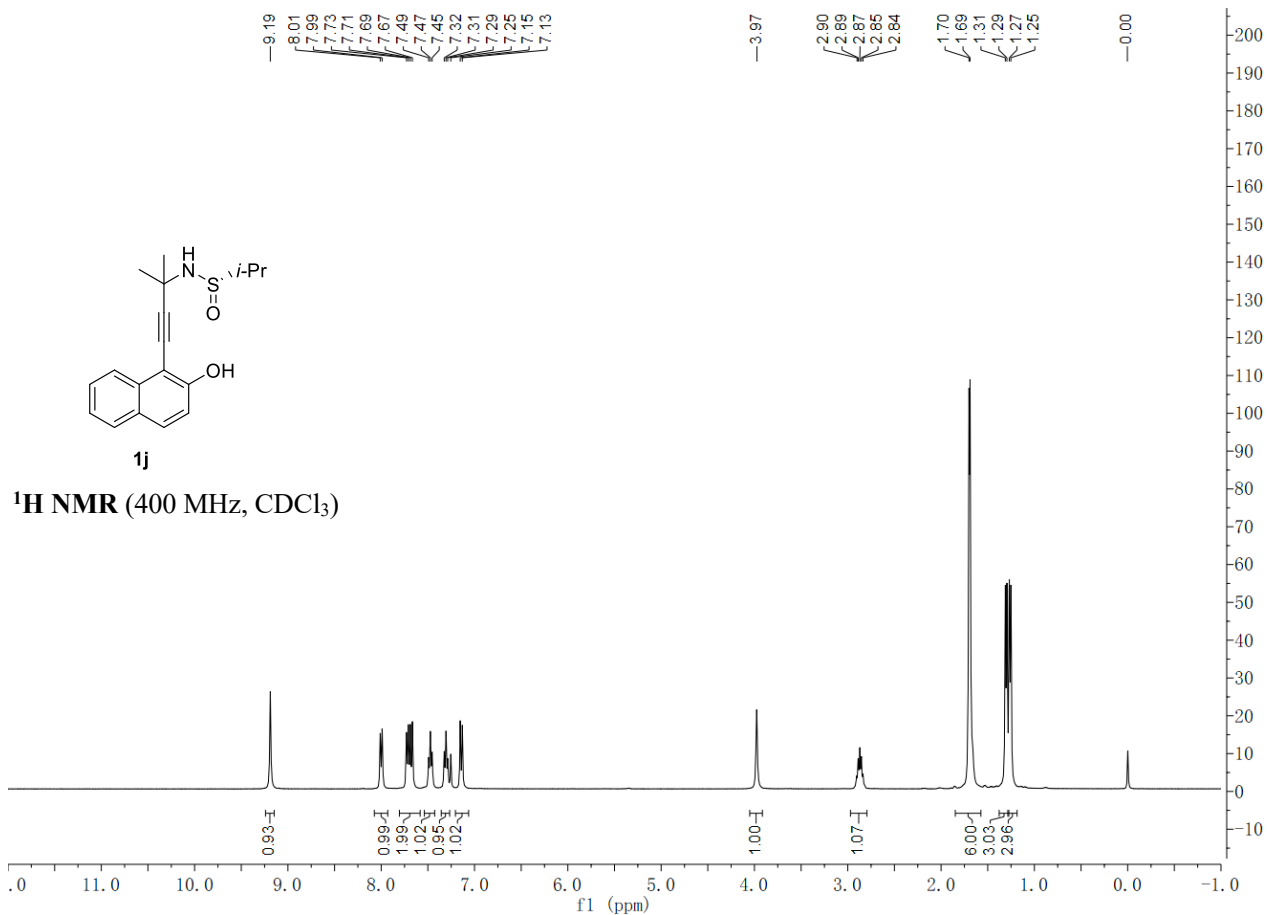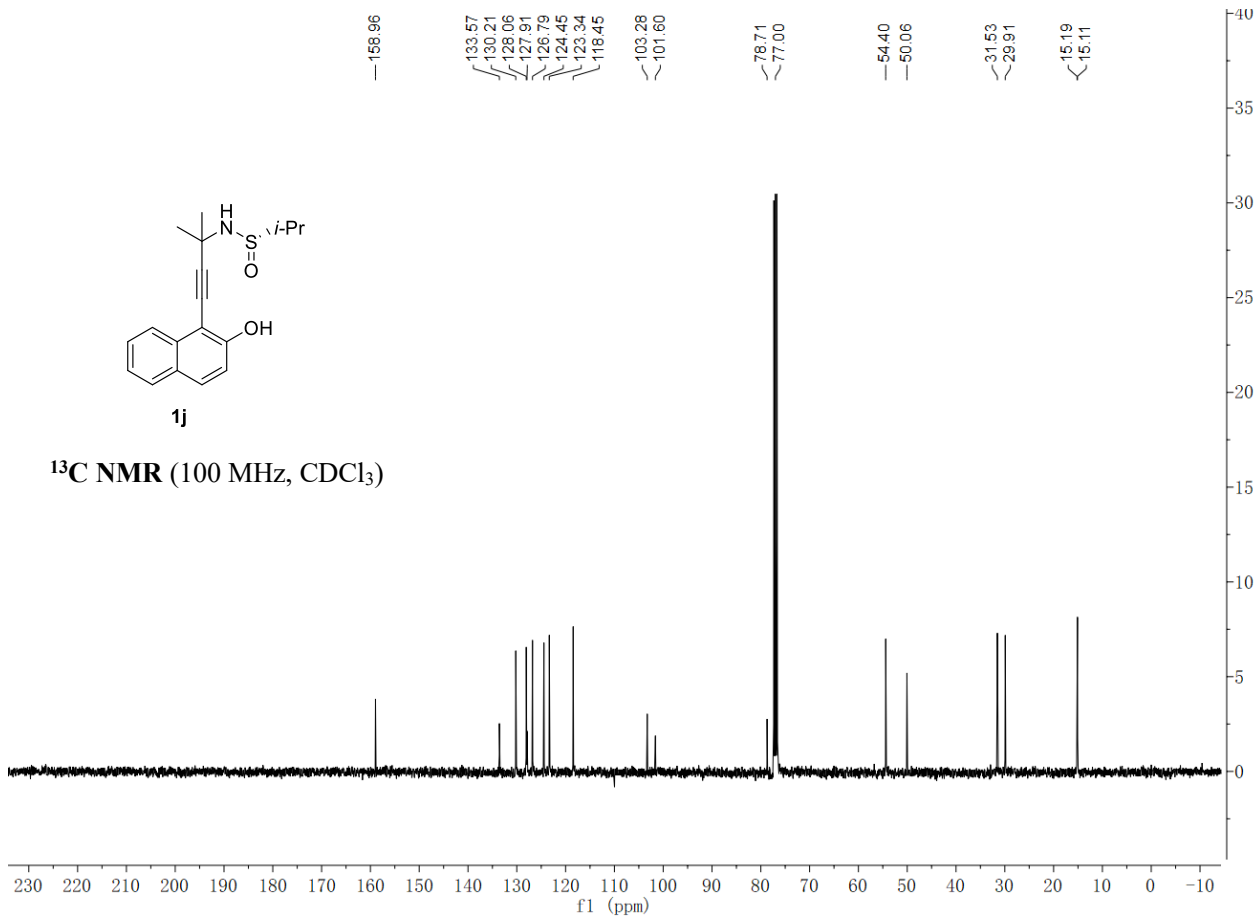

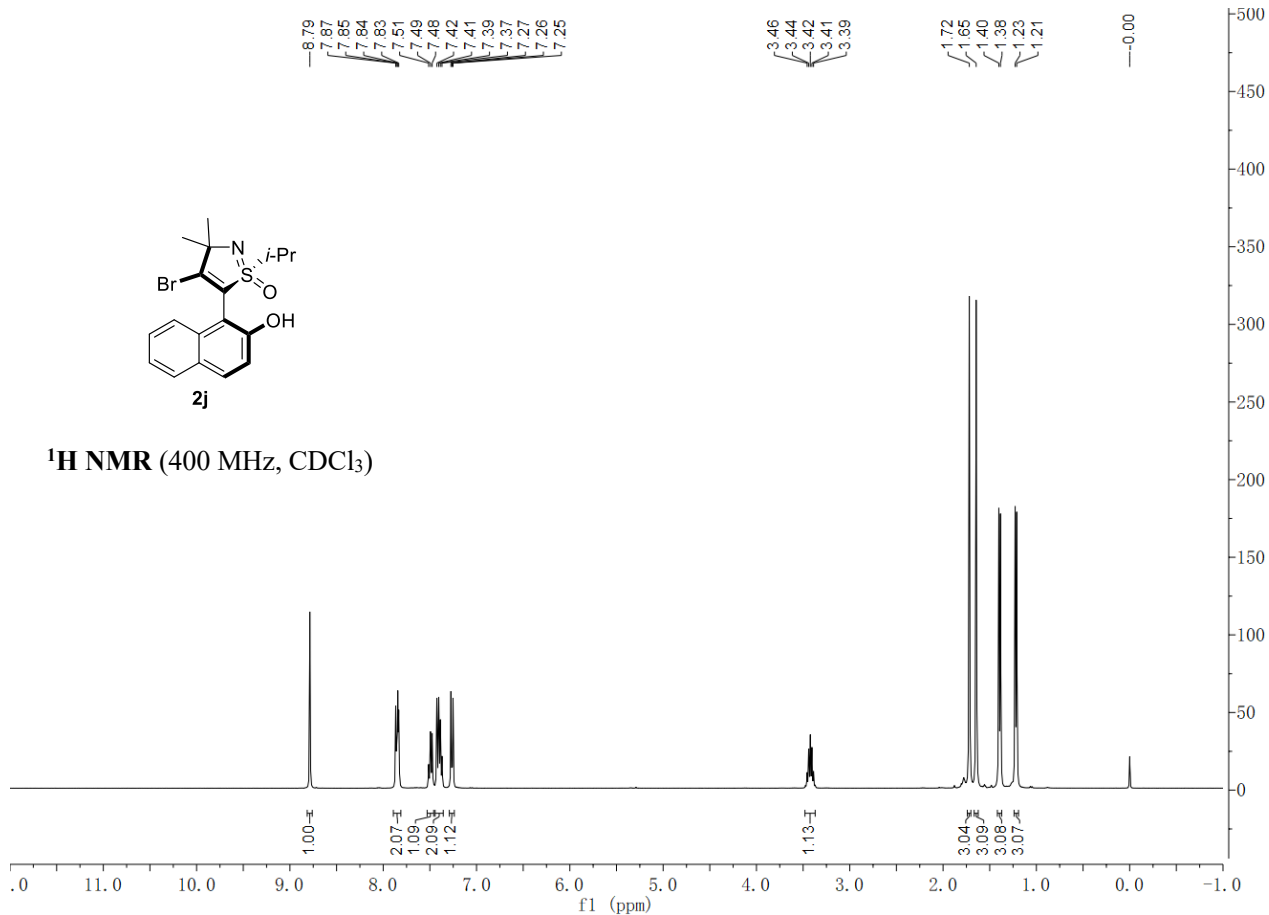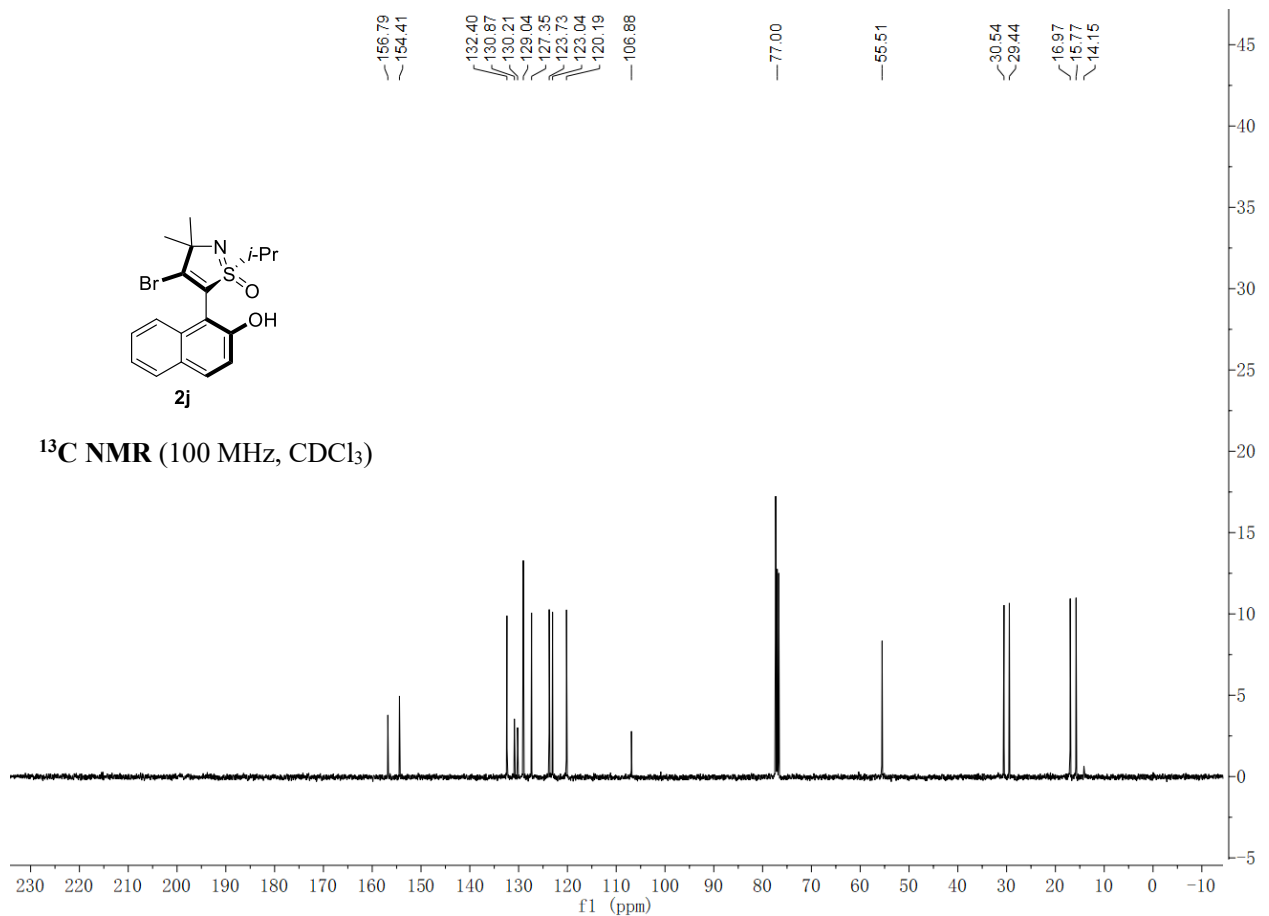

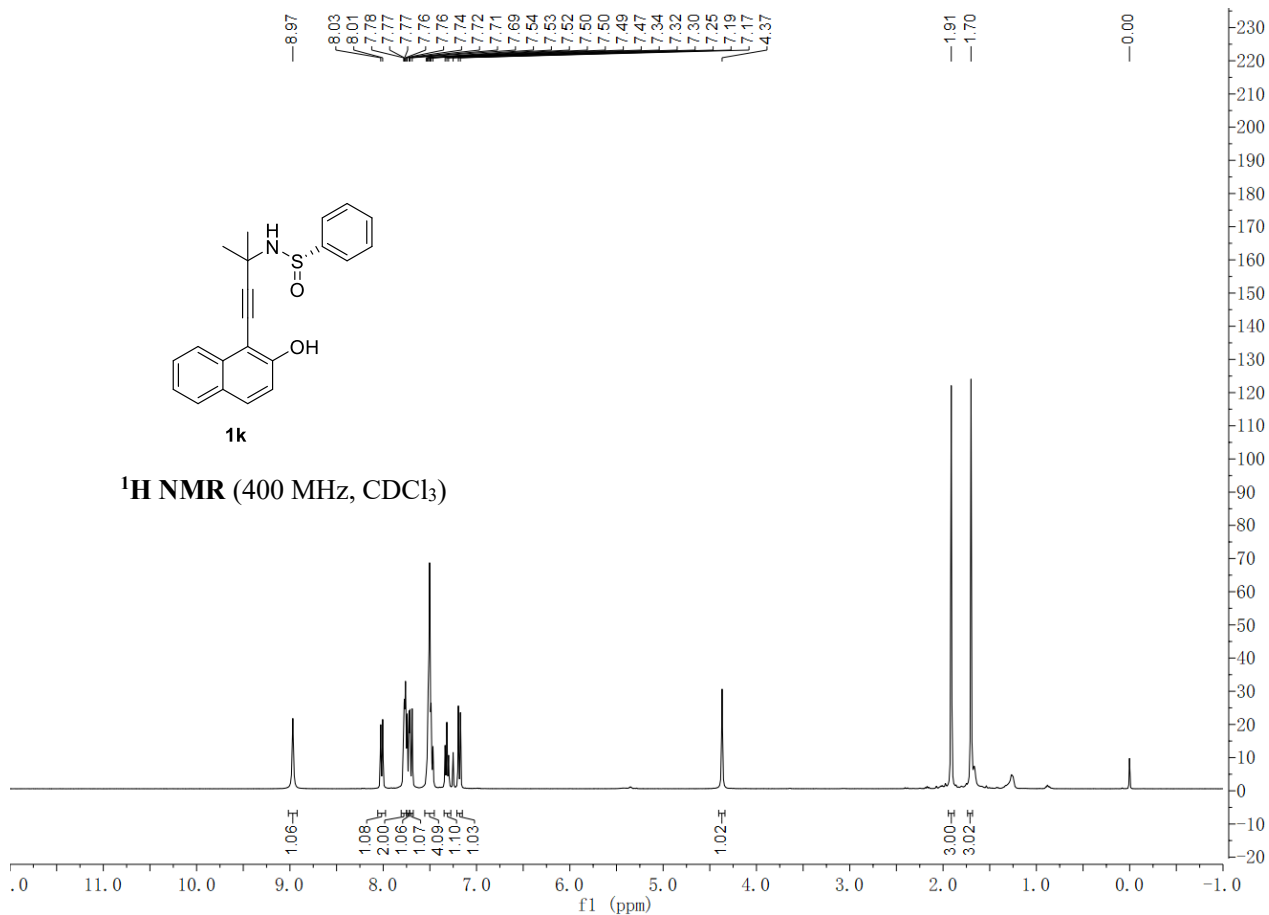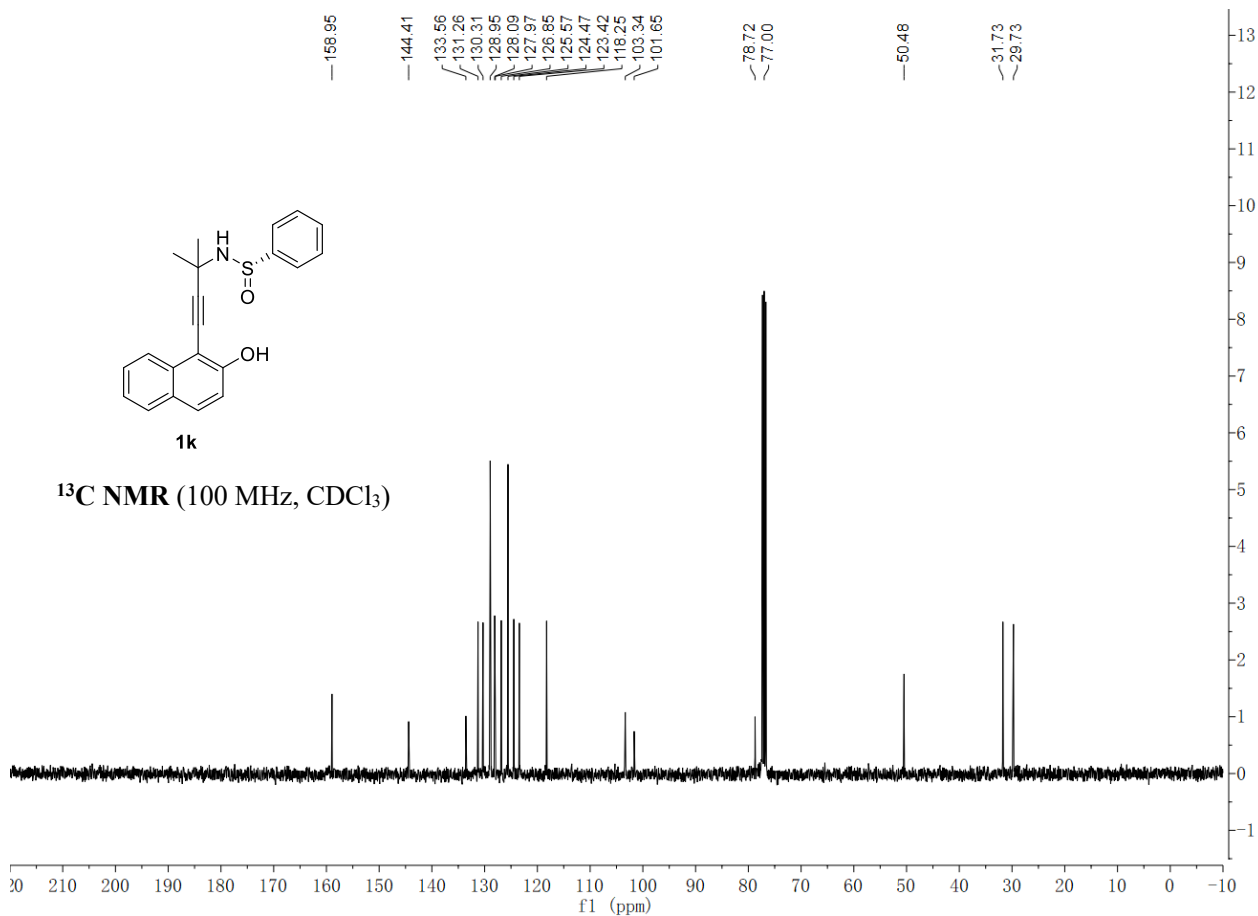

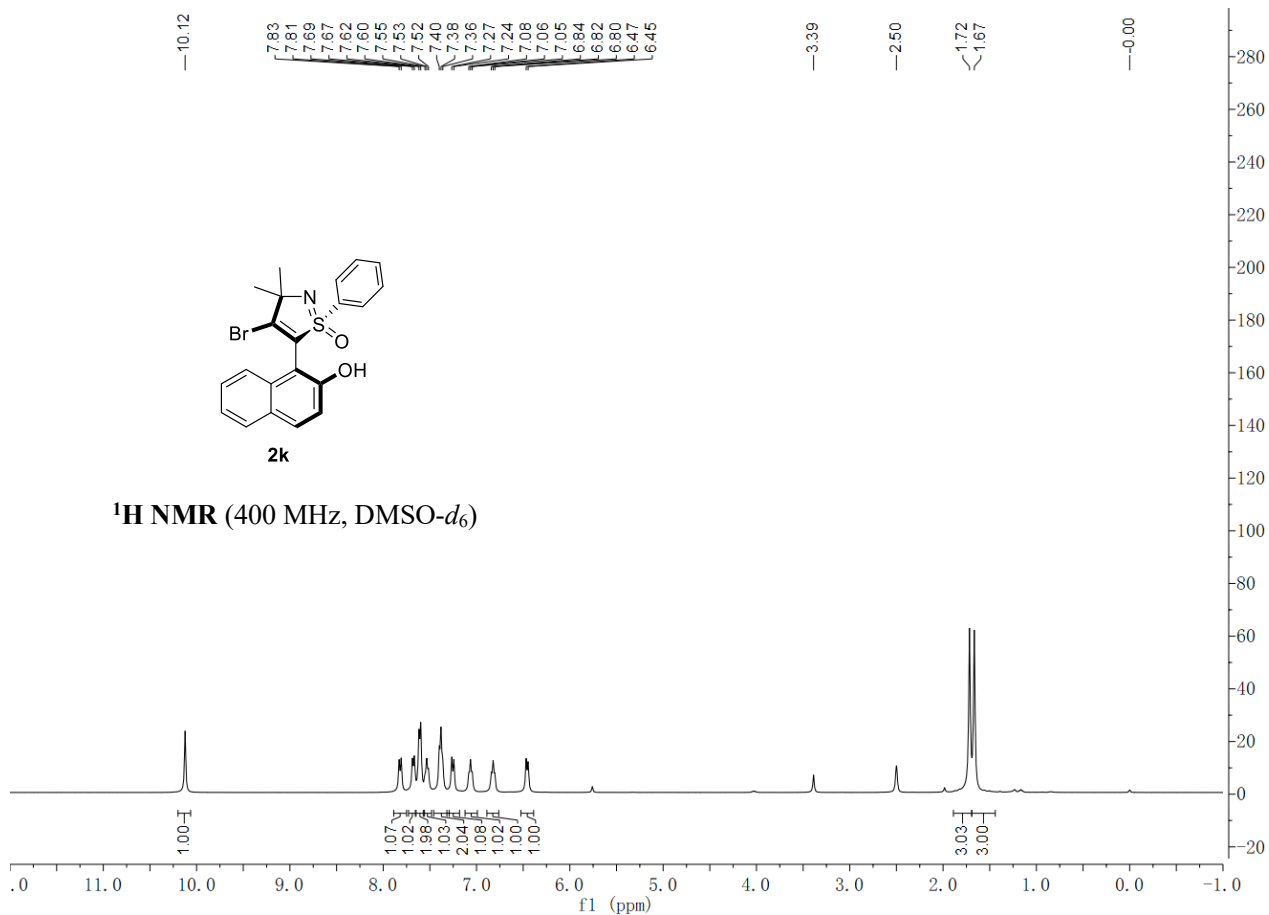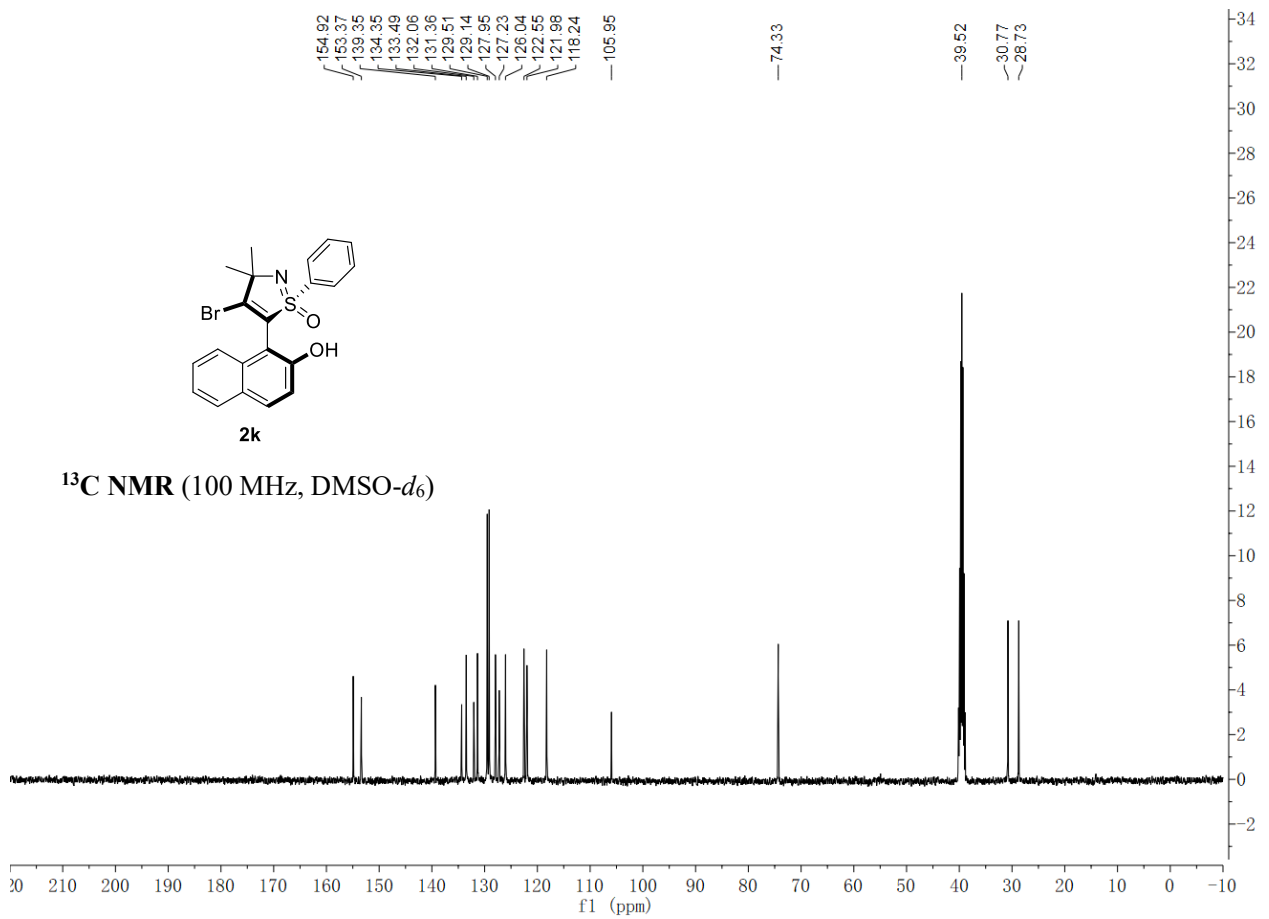

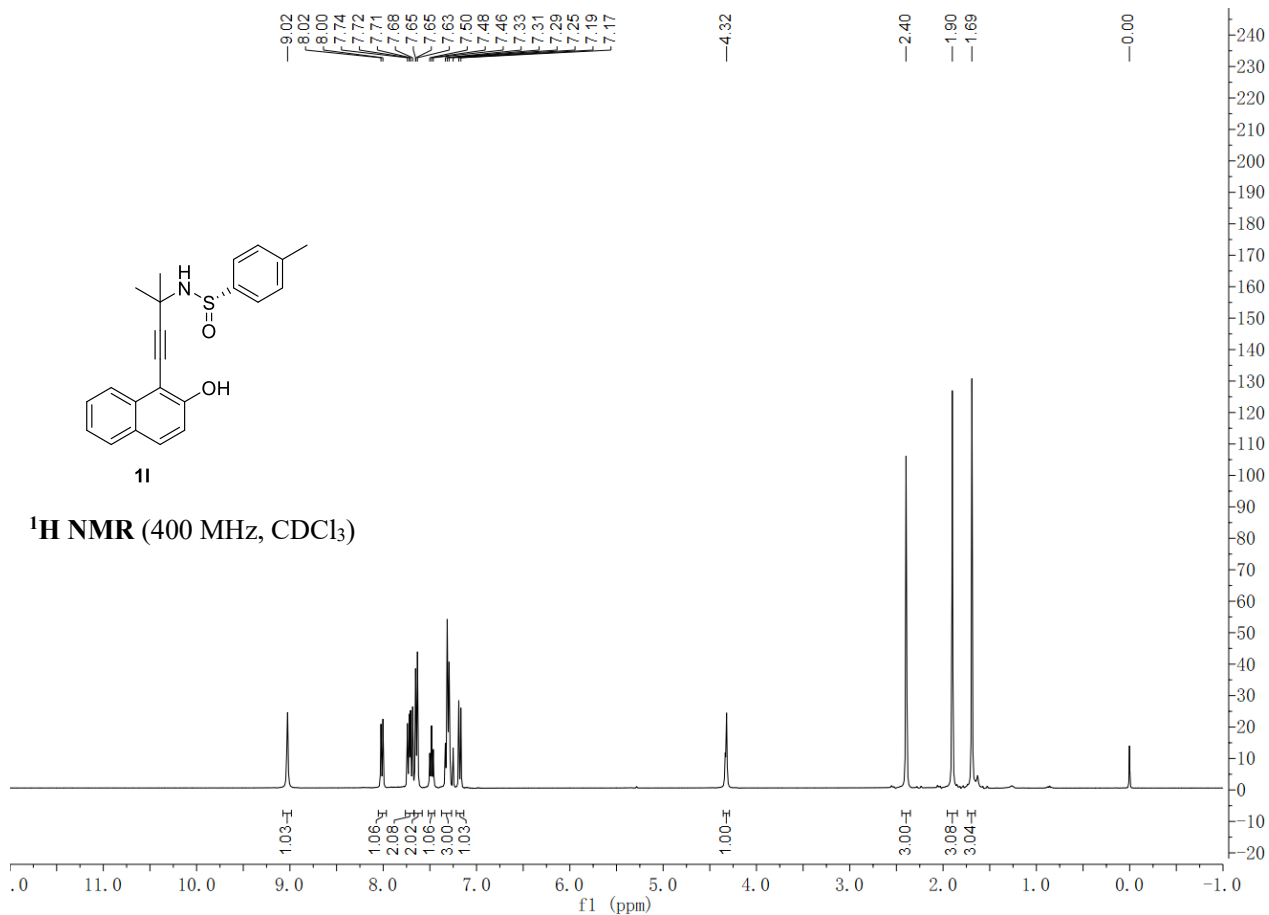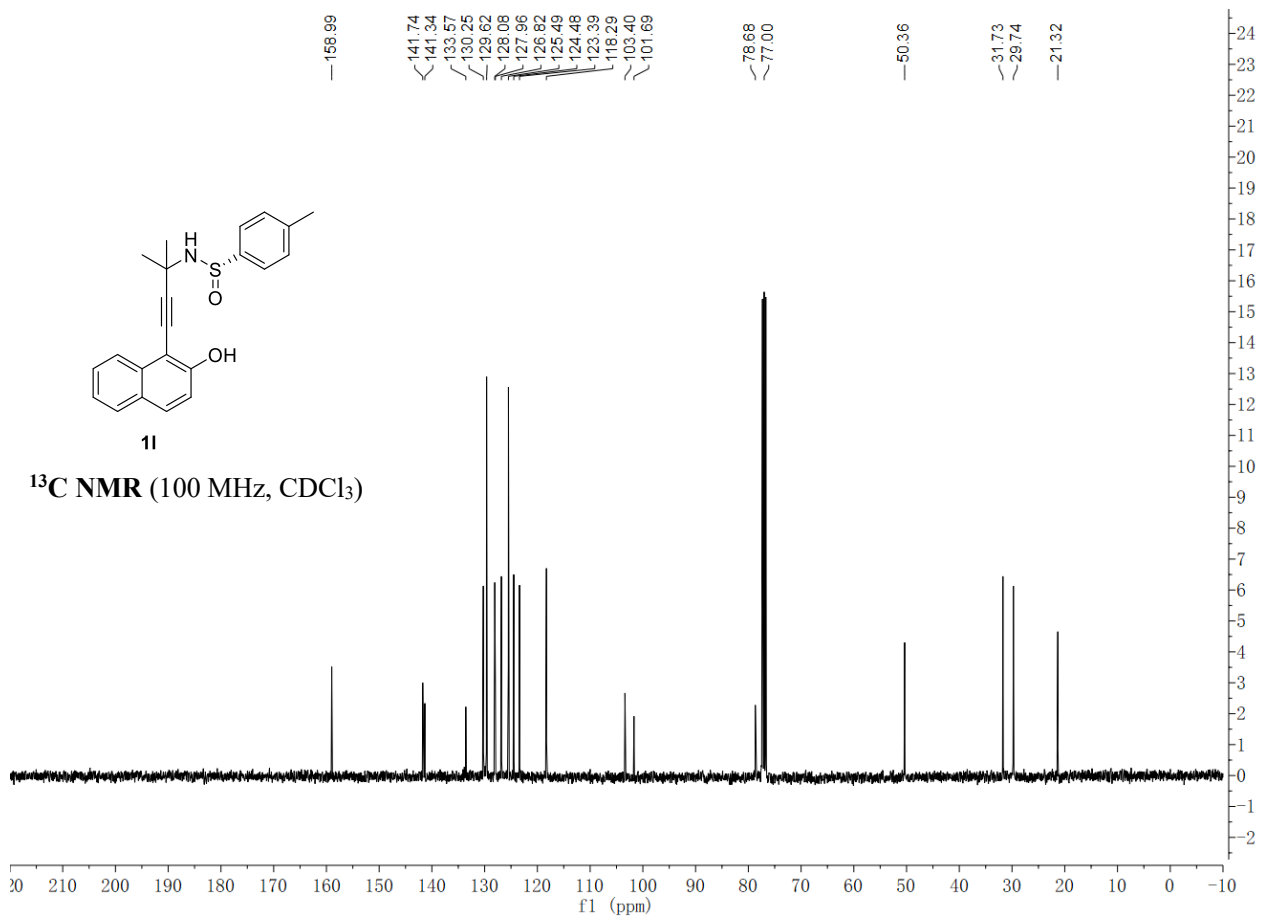



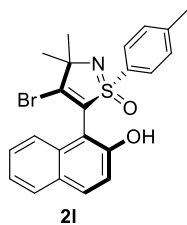

**<sup>1</sup>H NMR (400 MHz, CDCl<sub>3</sub>)**

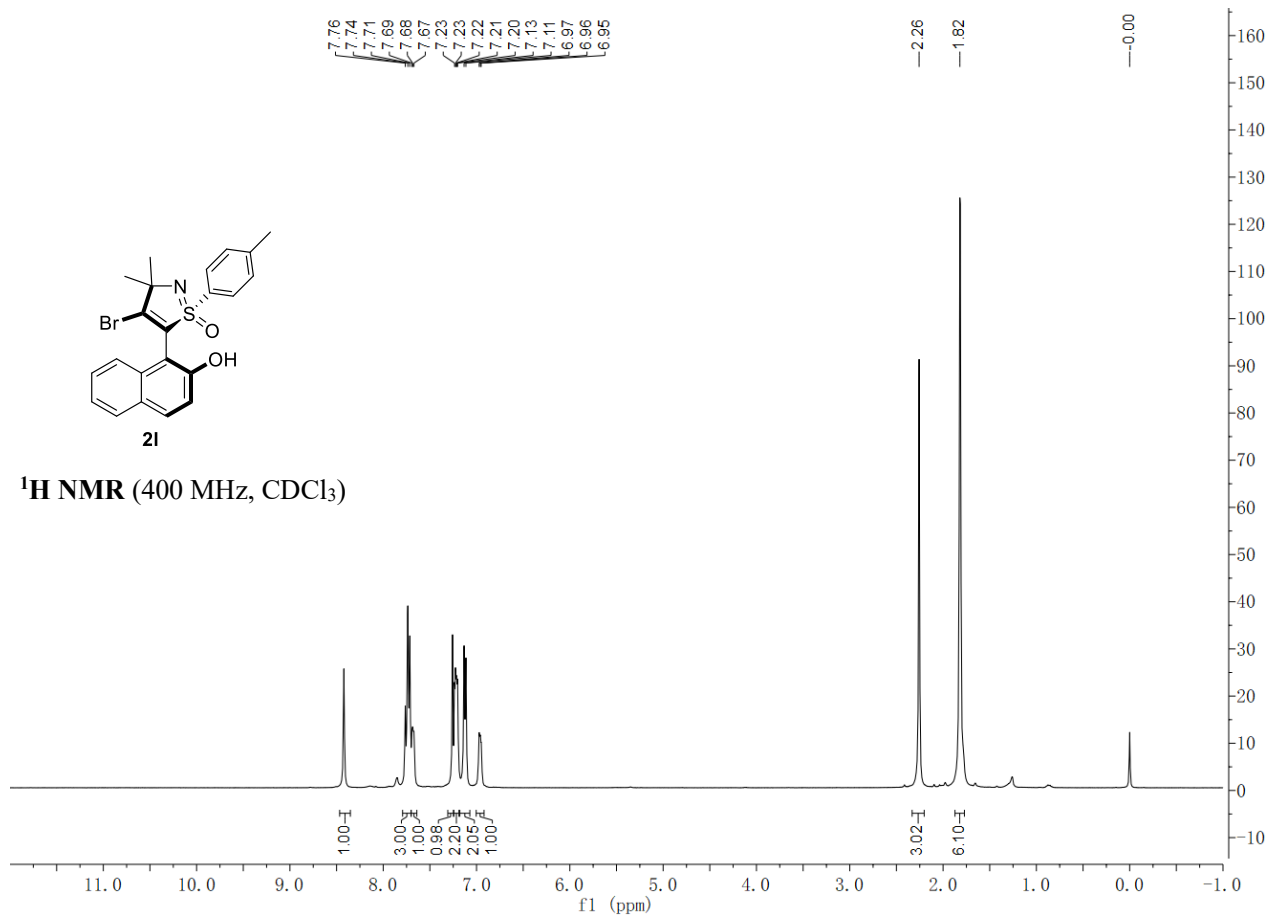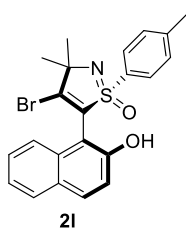

**<sup>13</sup>C NMR (100 MHz, CDCl<sub>3</sub>)**

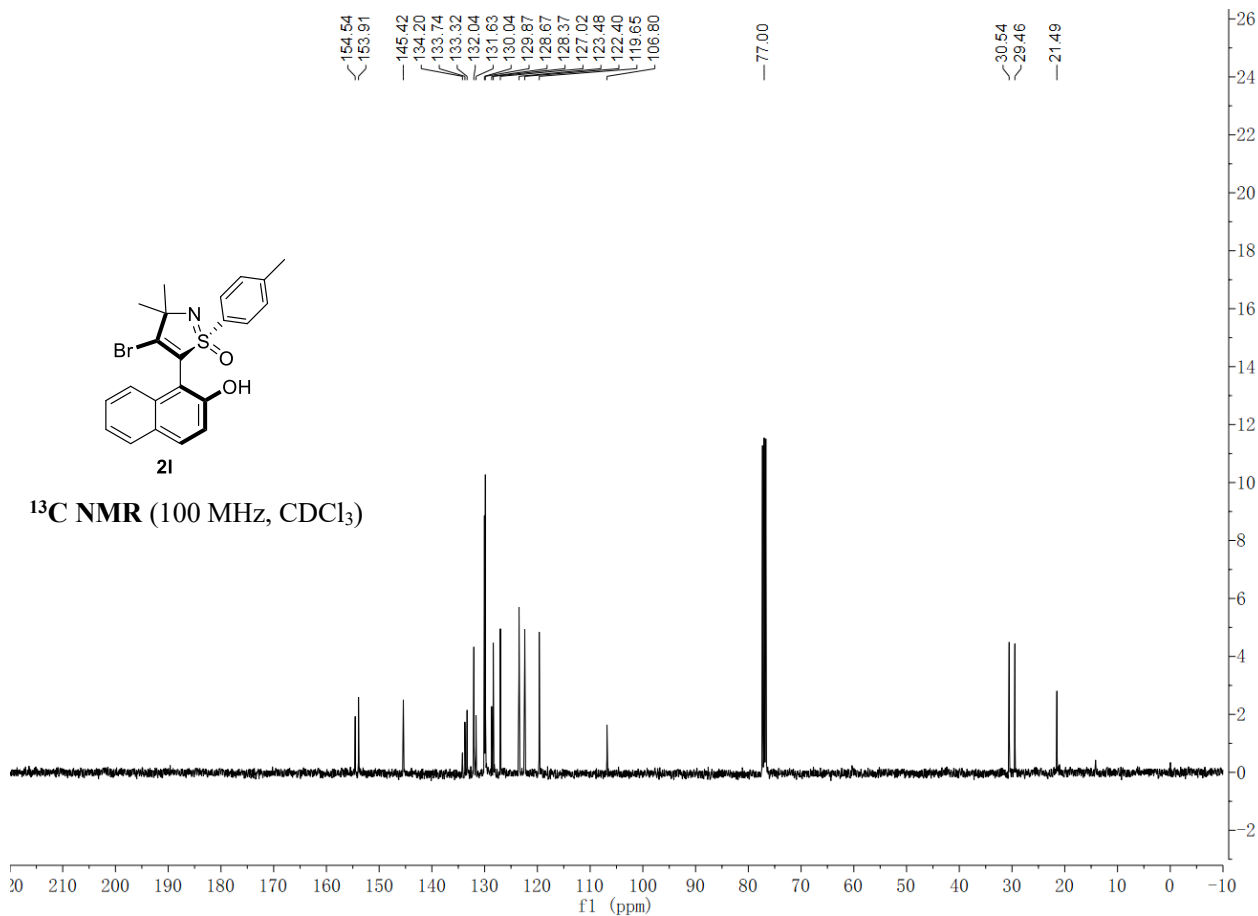

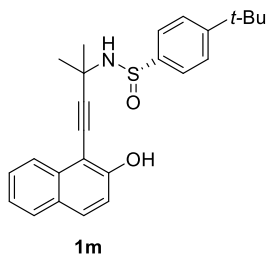

**<sup>1</sup>H NMR (400 MHz, CDCl<sub>3</sub>)**

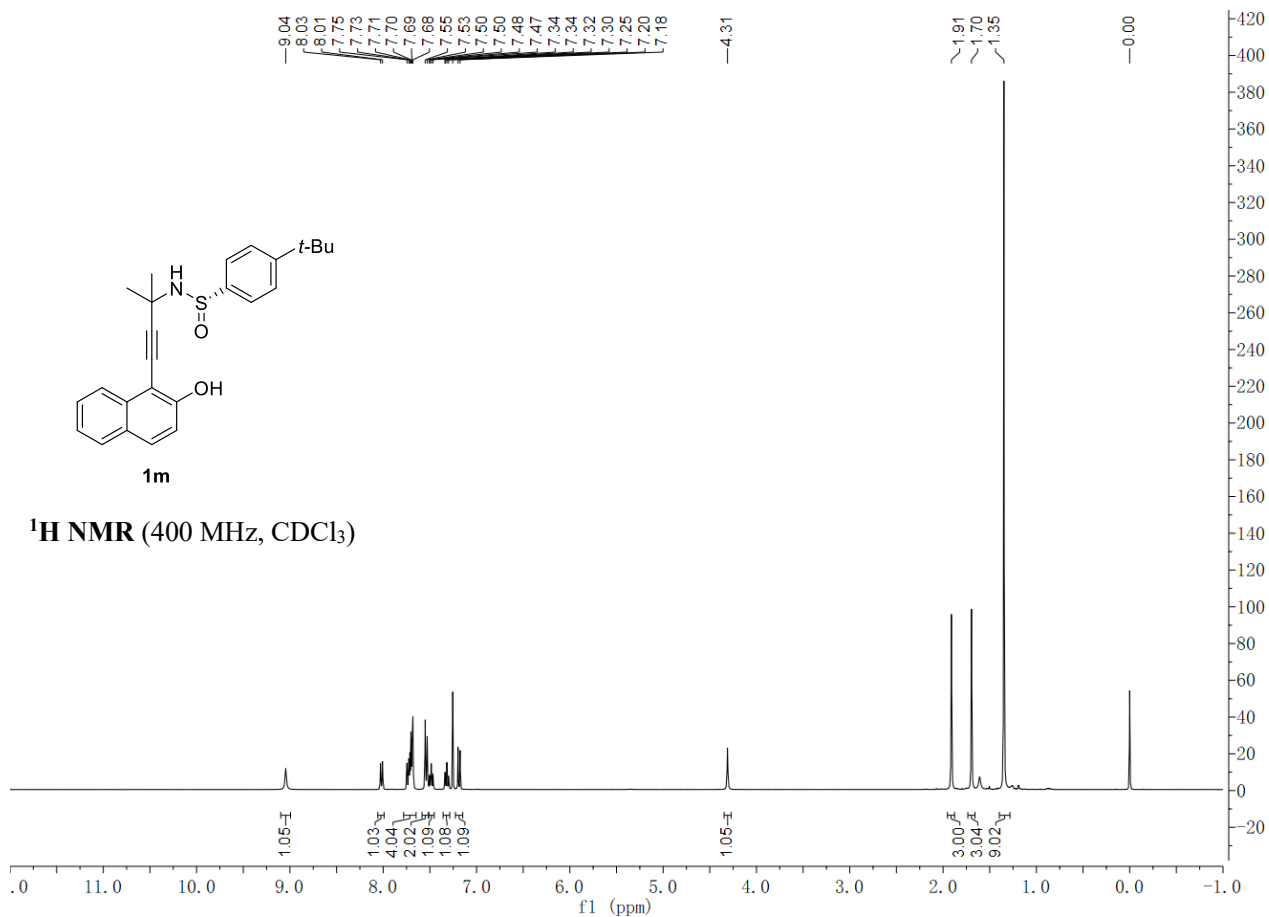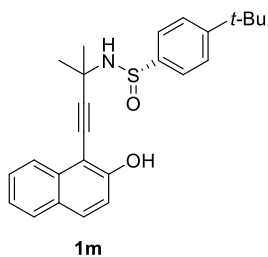

**<sup>13</sup>C NMR (100 MHz, CDCl<sub>3</sub>)**

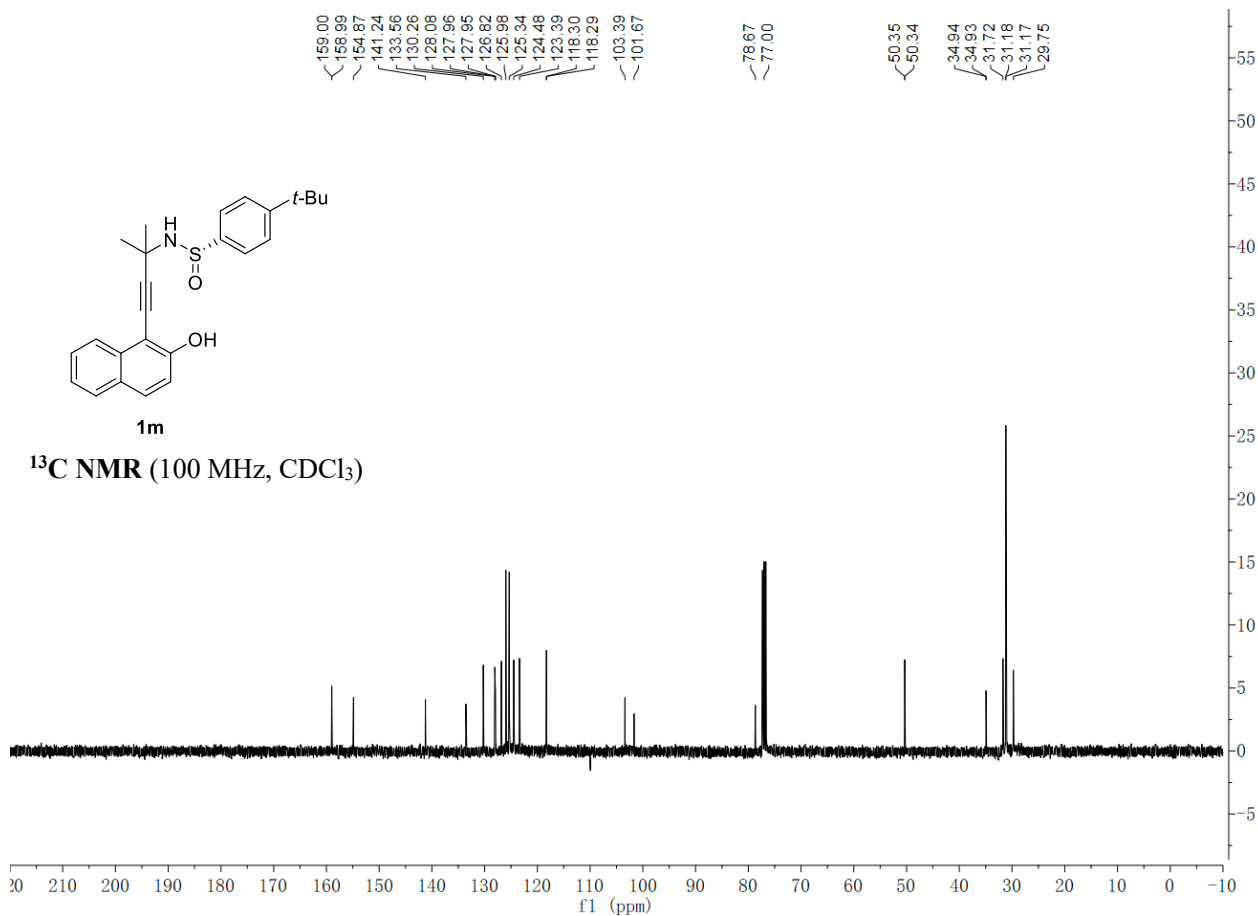

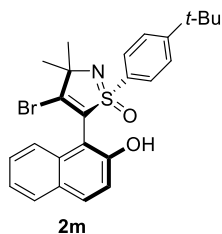

**<sup>1</sup>H NMR (400 MHz, CDCl<sub>3</sub>)**

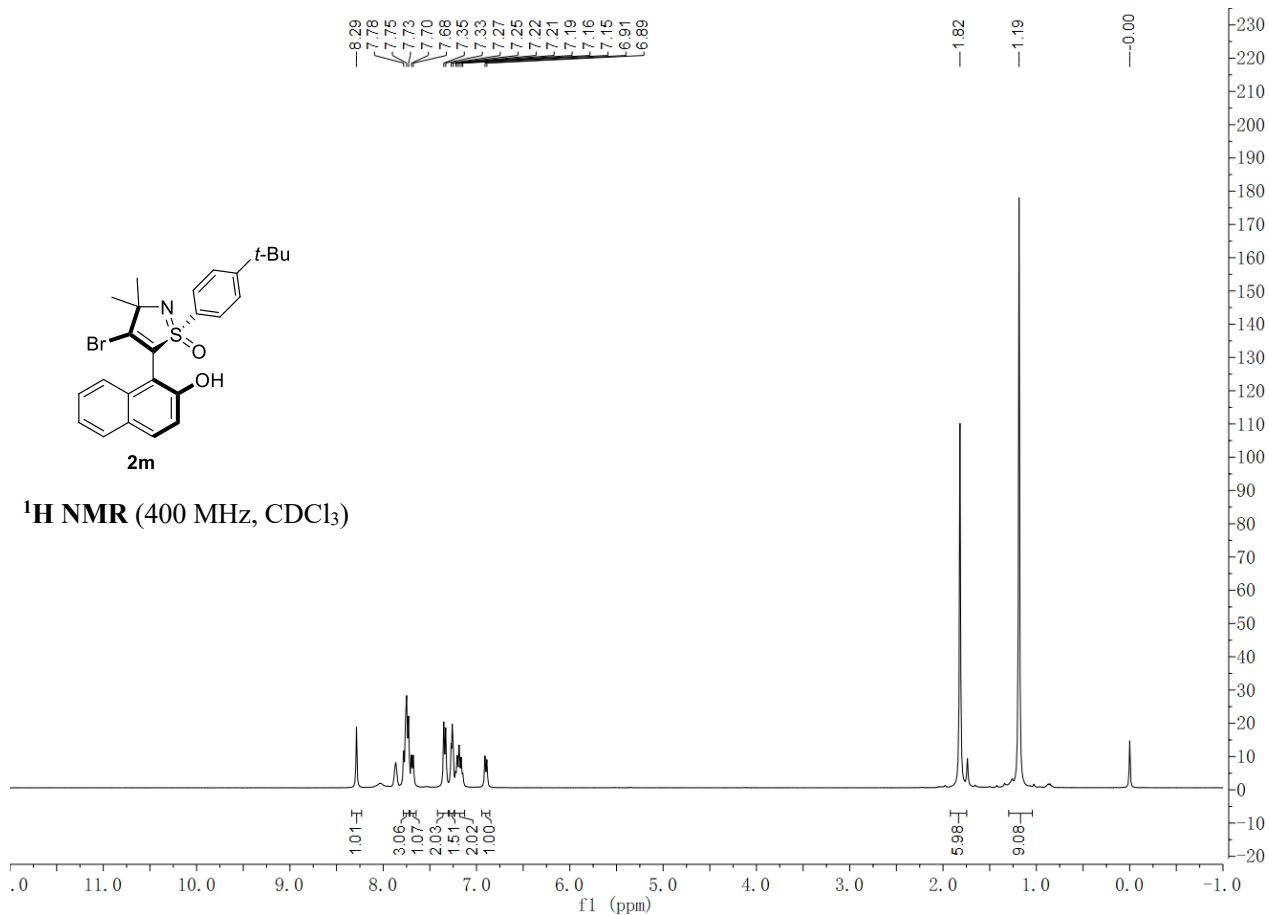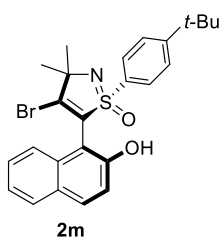

**<sup>13</sup>C NMR (100 MHz, CDCl<sub>3</sub>)**

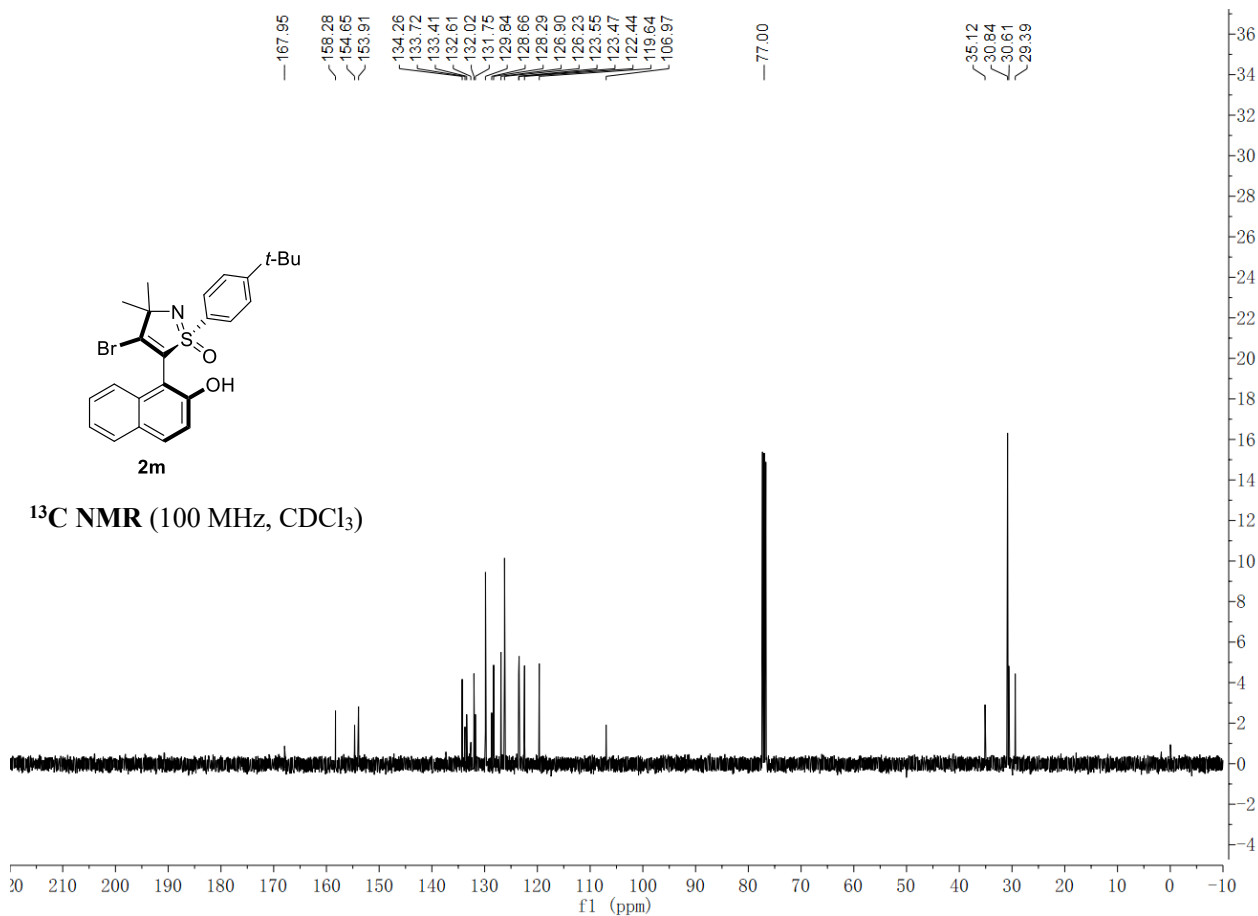

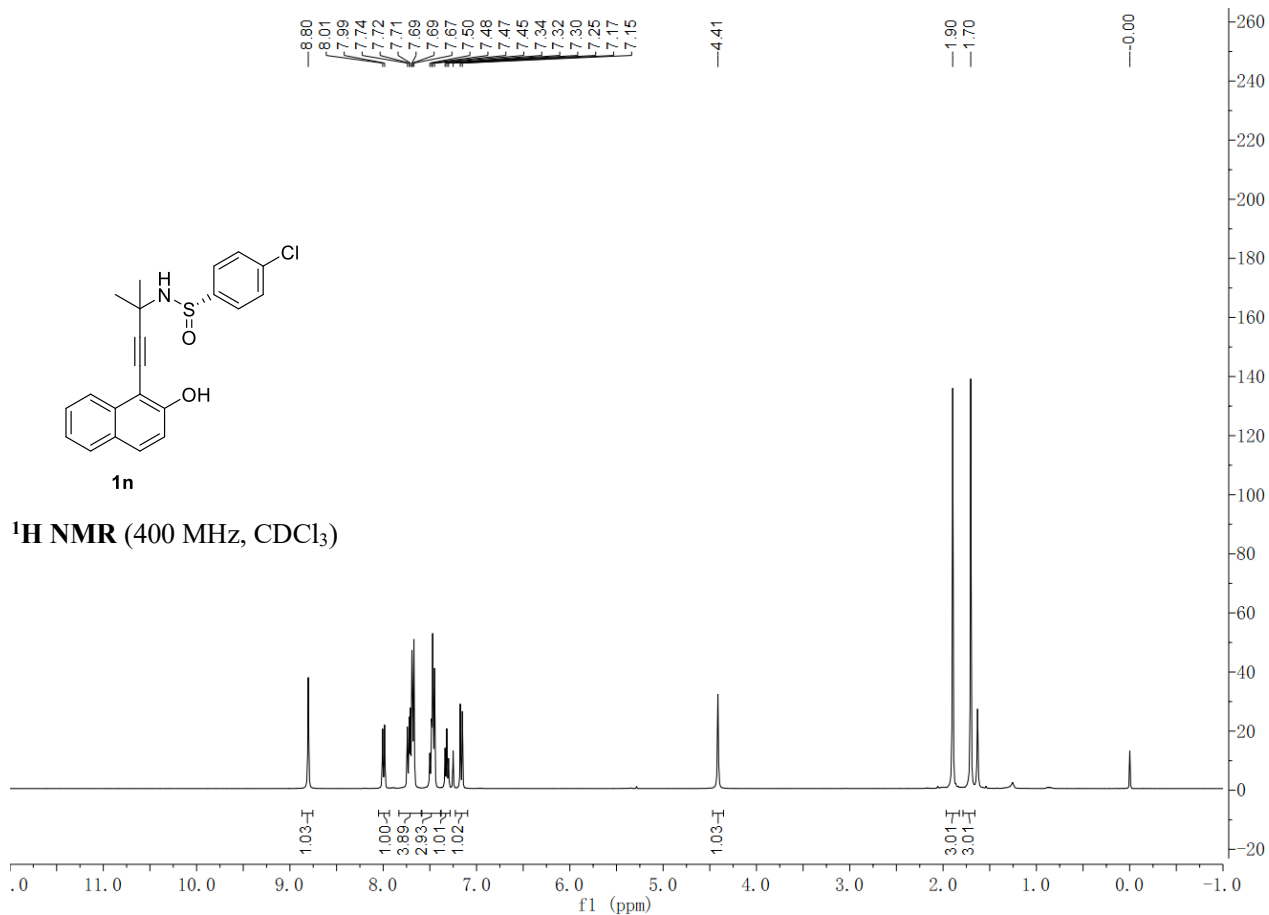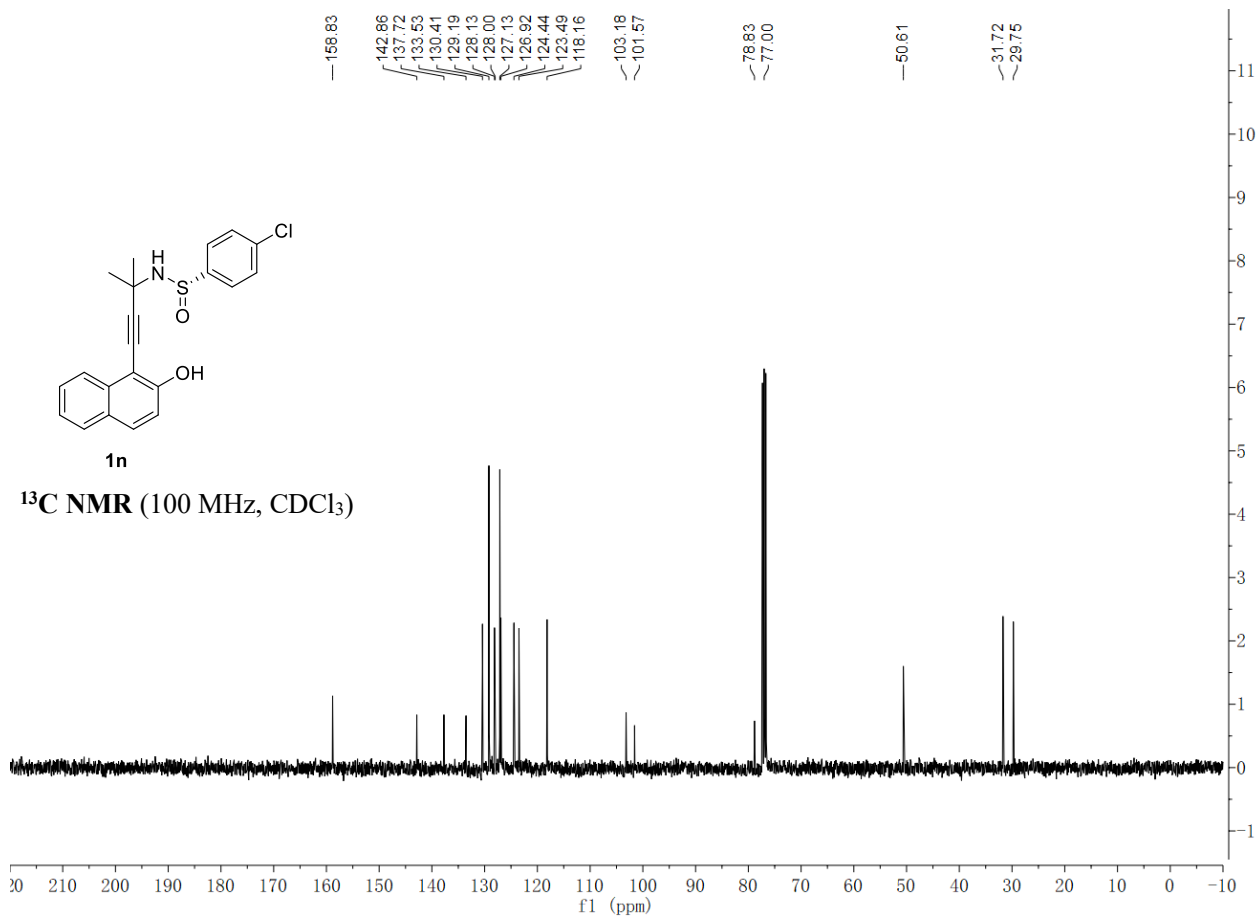

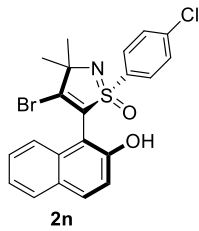

<sup>1</sup>H NMR (400 MHz, CDCl<sub>3</sub>)

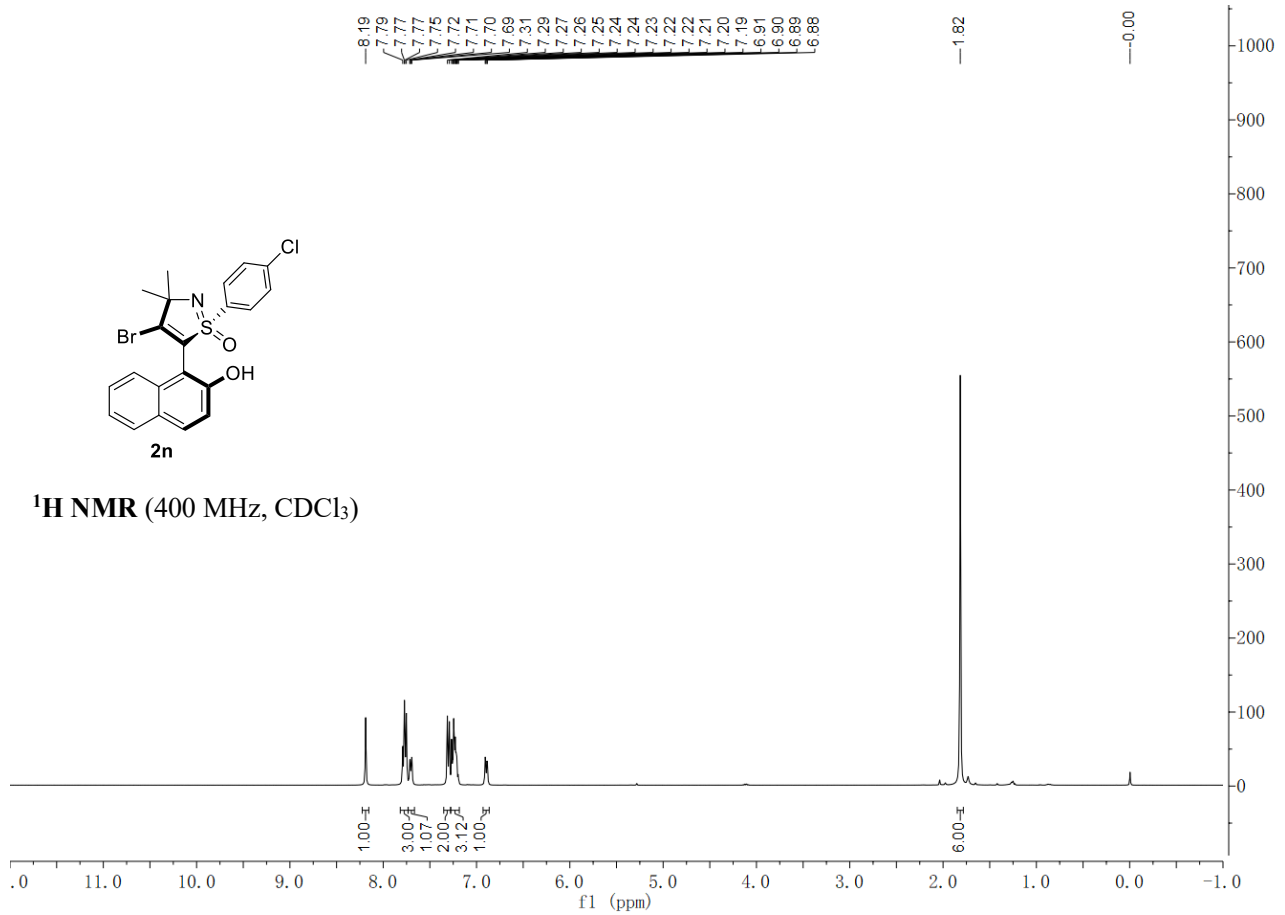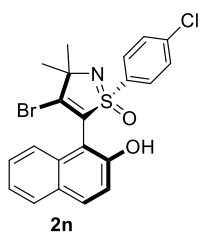

<sup>13</sup>C NMR (100 MHz, CDCl<sub>3</sub>)

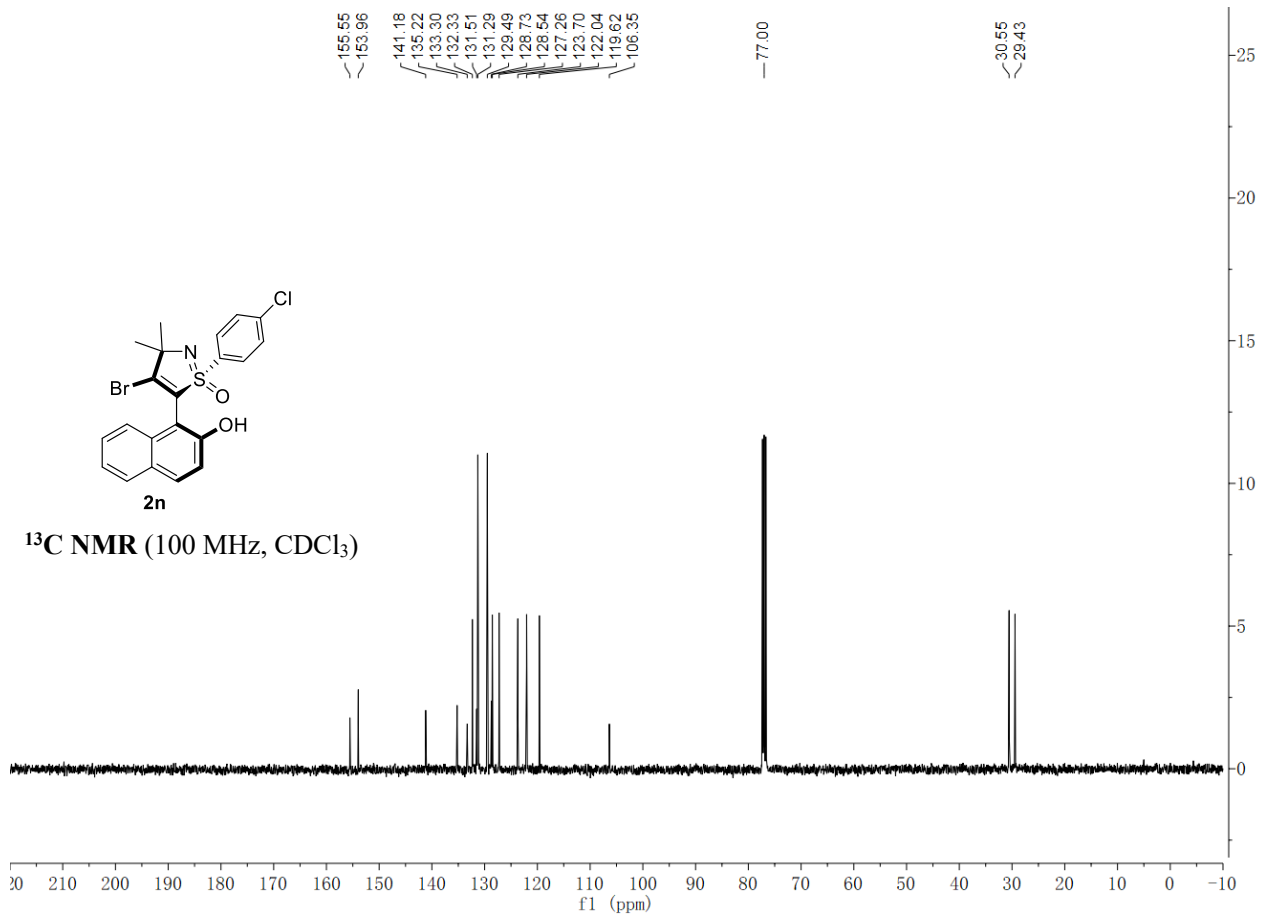

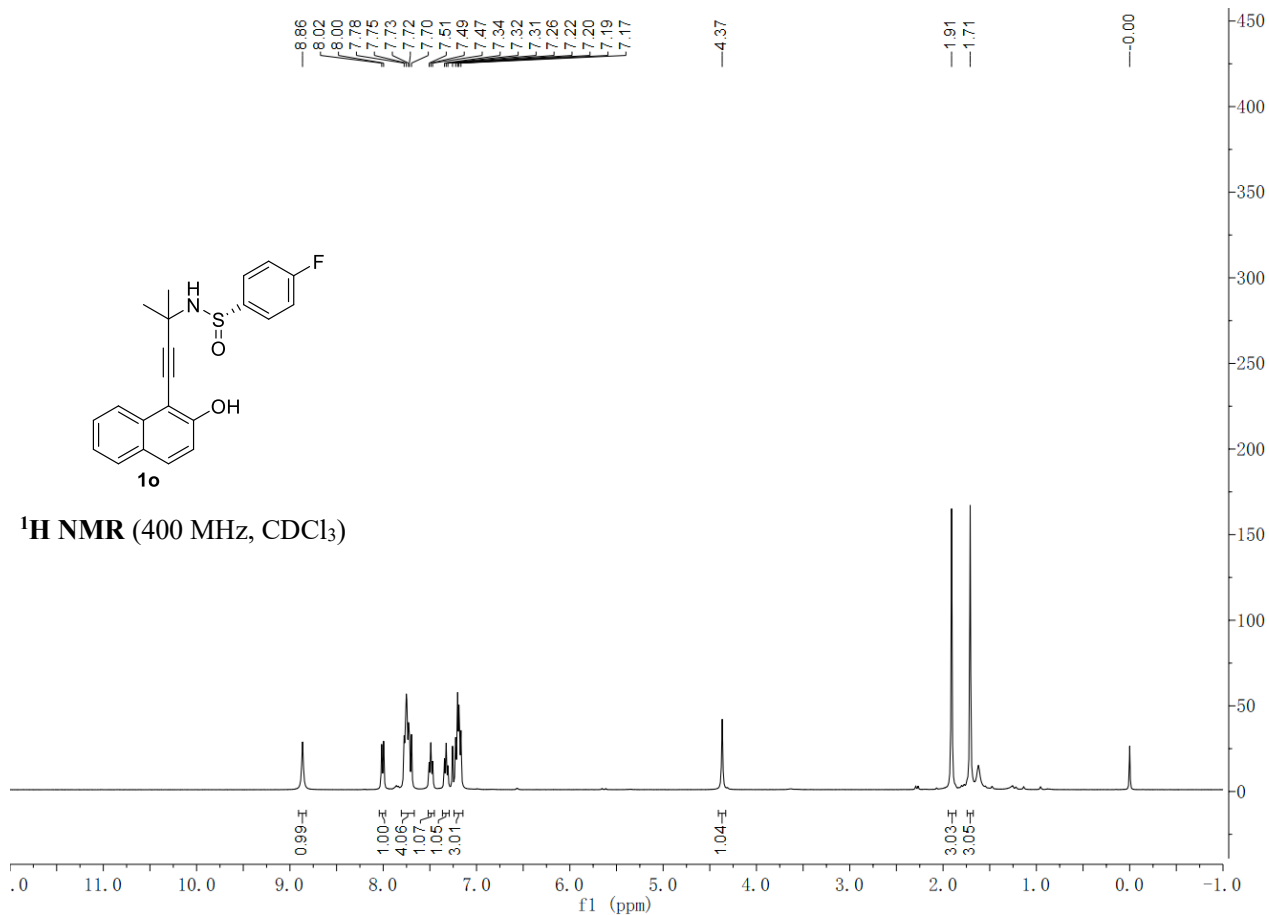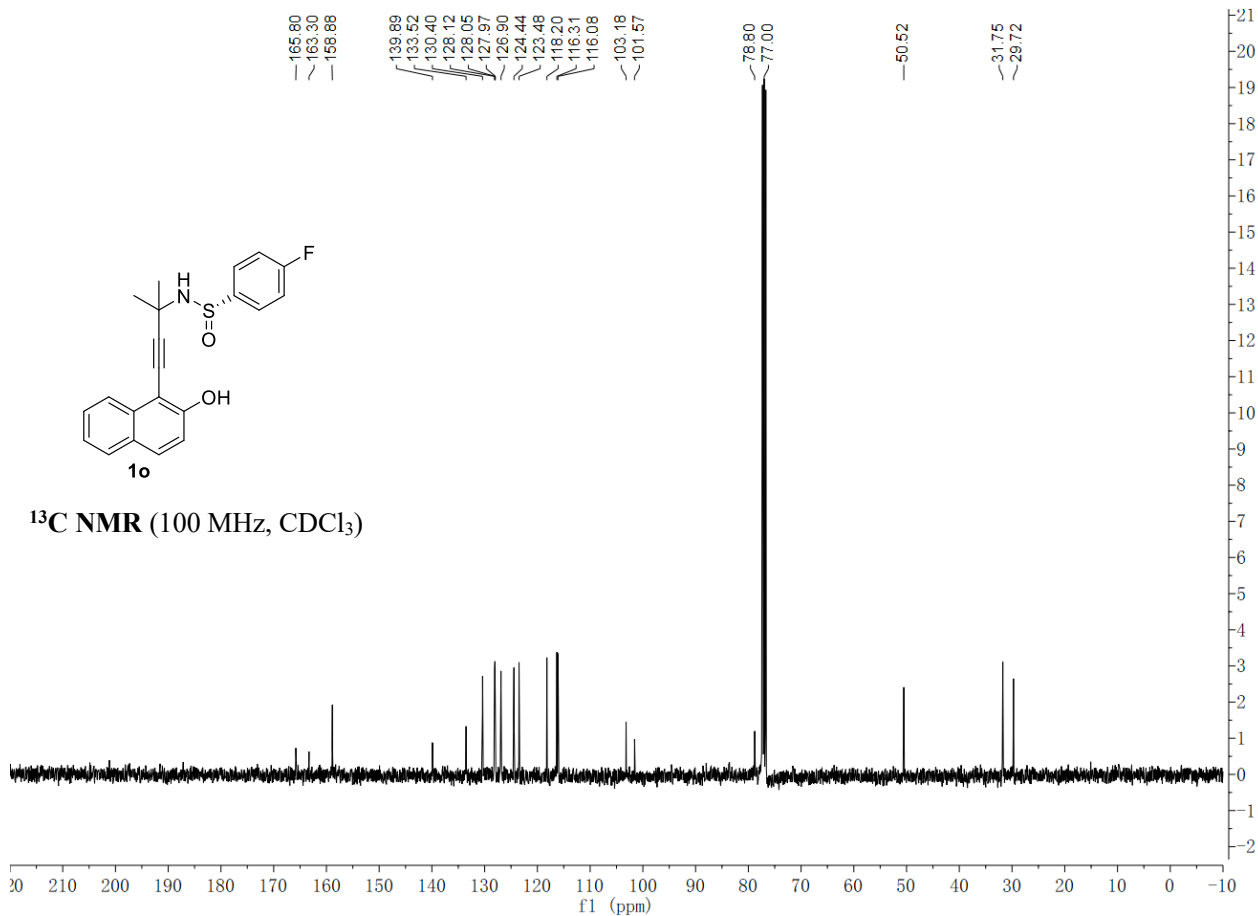

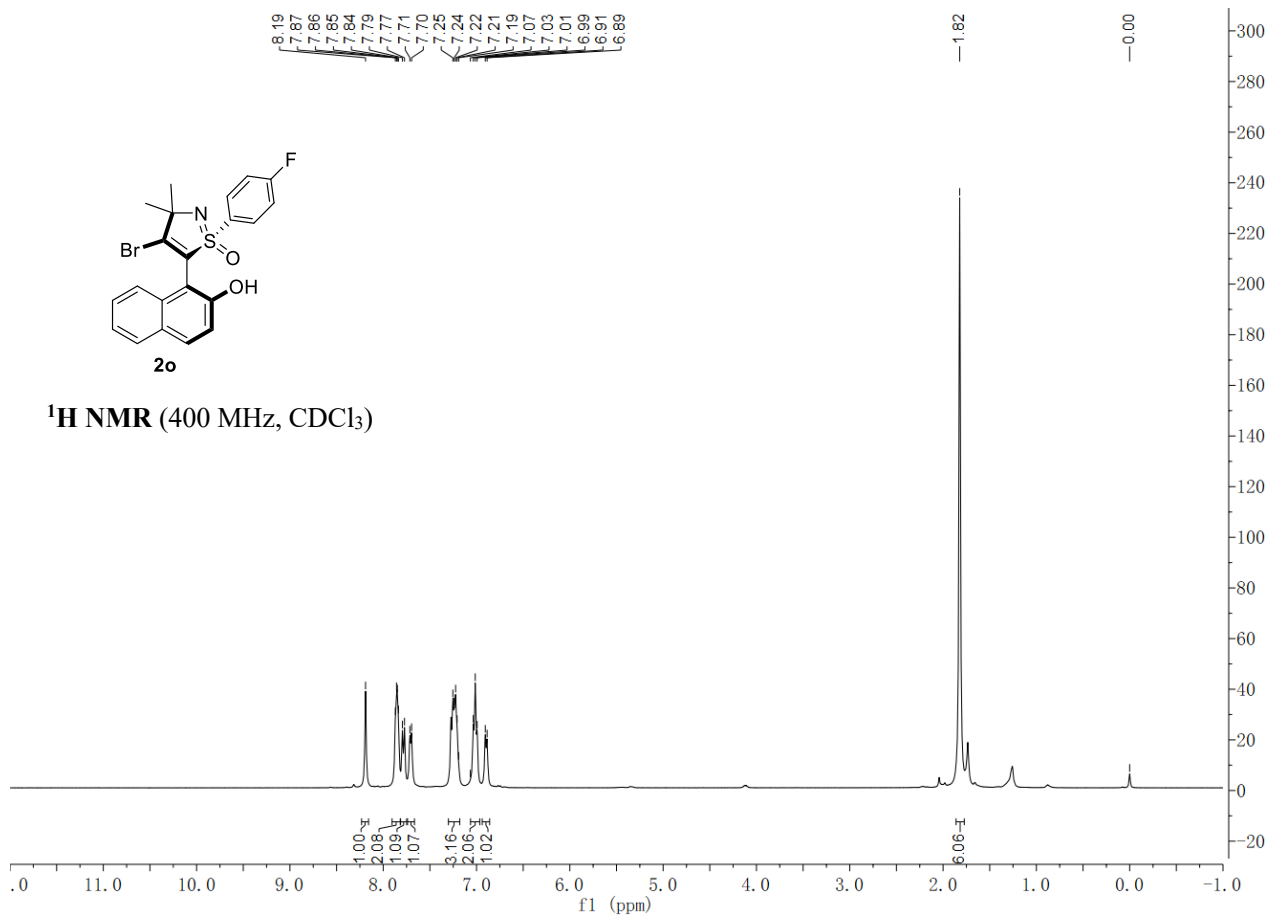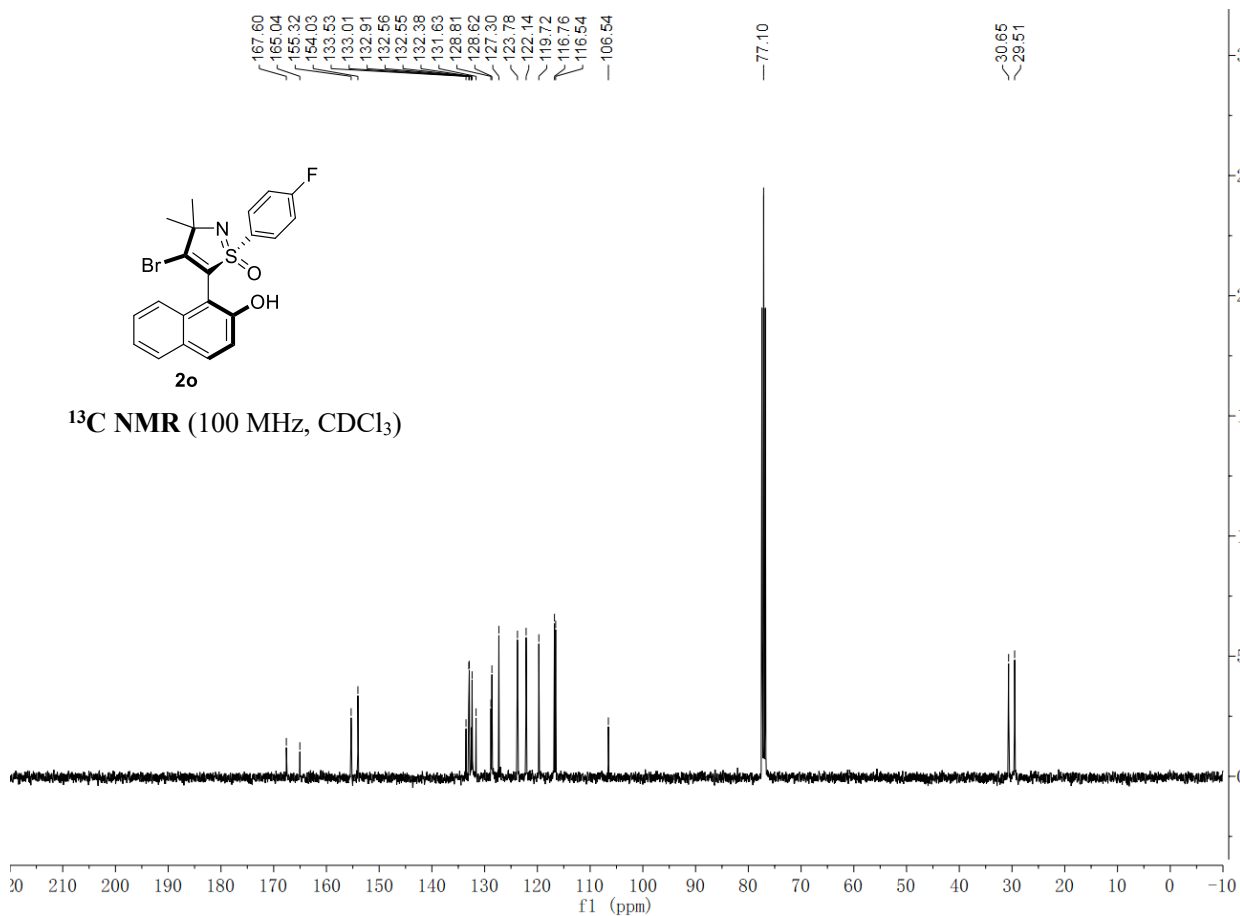

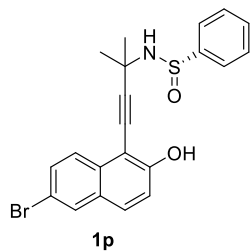

**<sup>1</sup>H NMR (400 MHz, CDCl<sub>3</sub>)**

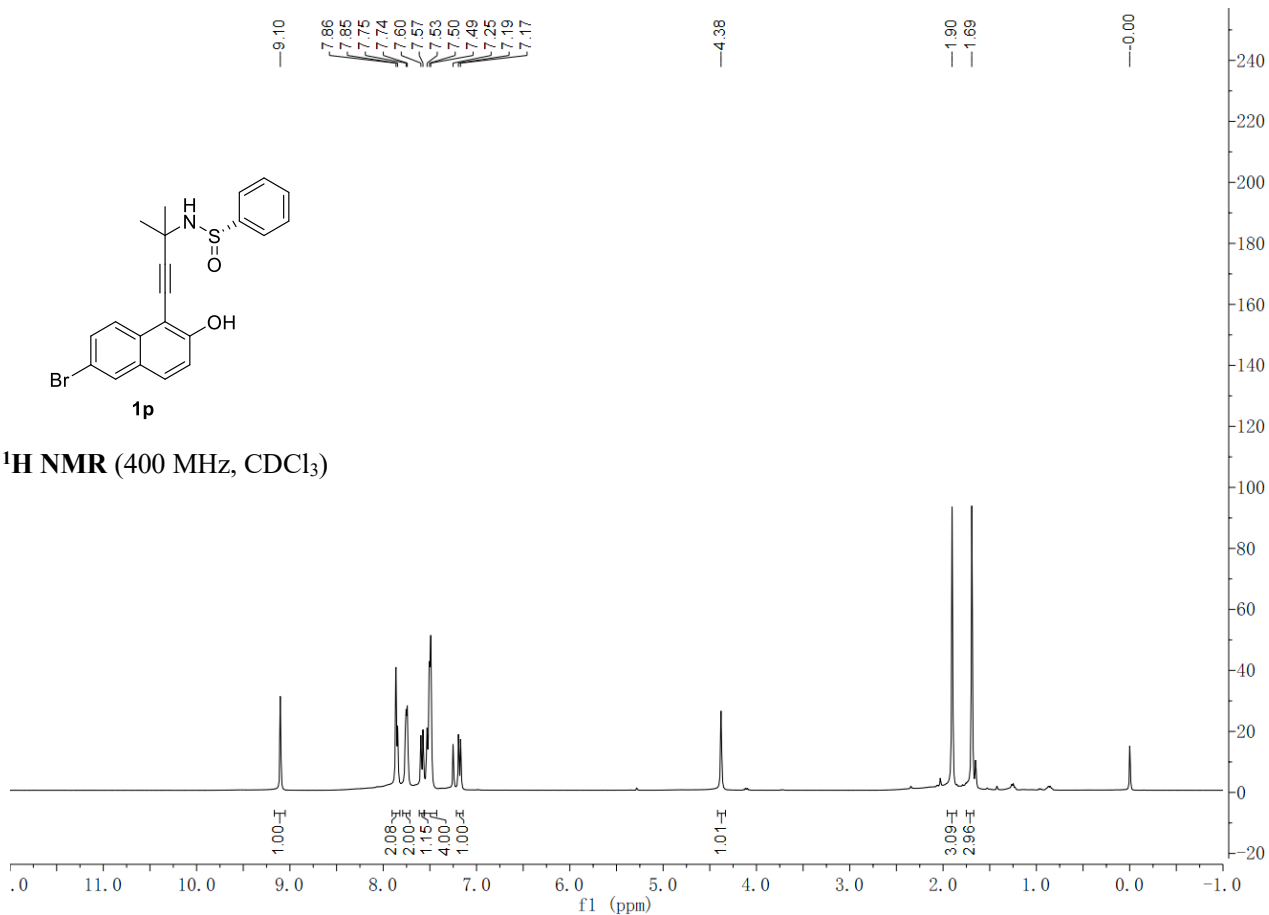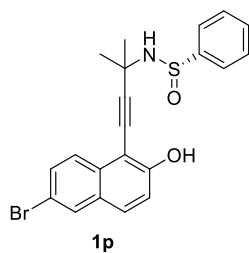

**<sup>13</sup>C NMR (100 MHz, CDCl<sub>3</sub>)**

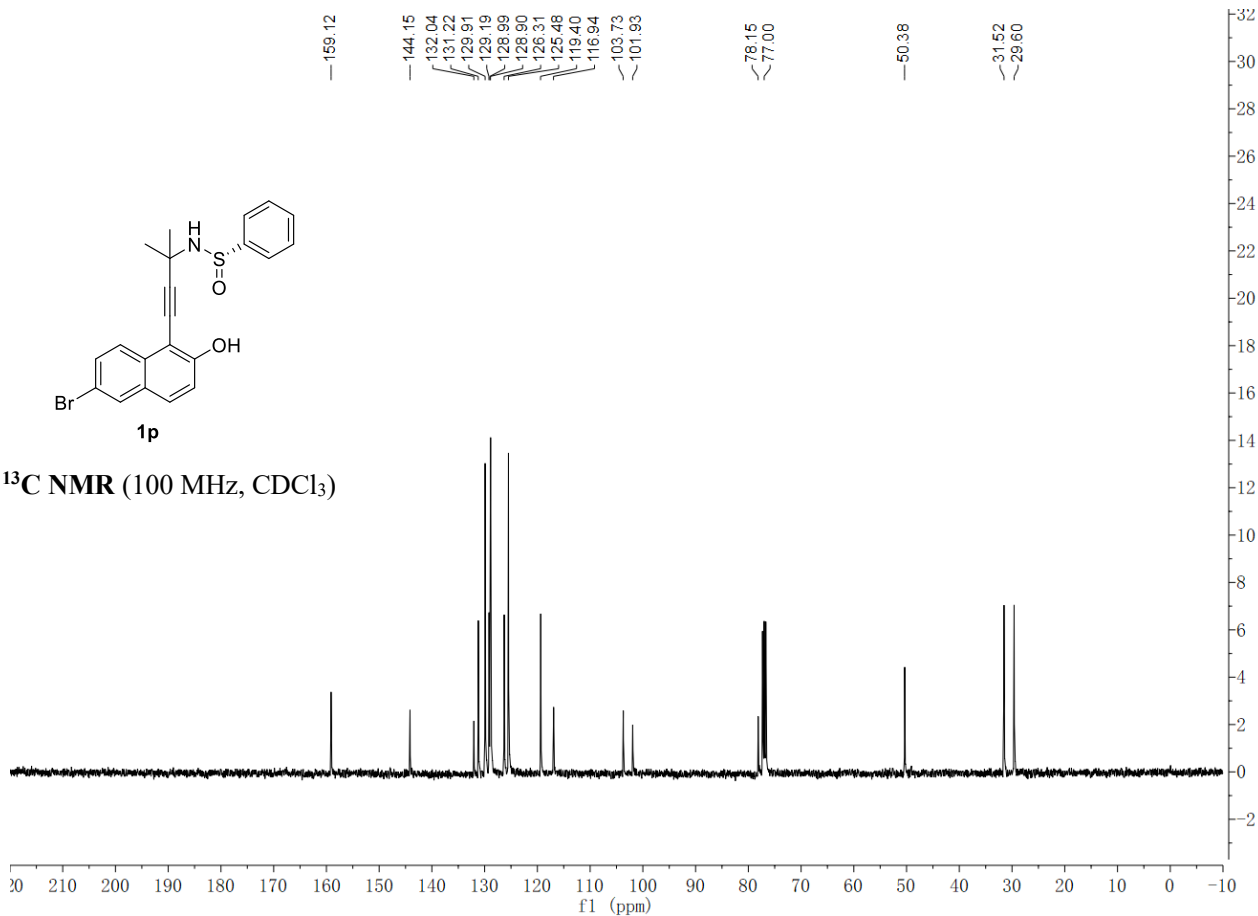



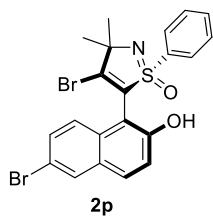

<sup>1</sup>H NMR (400 MHz, DMSO-*d*<sub>6</sub>)

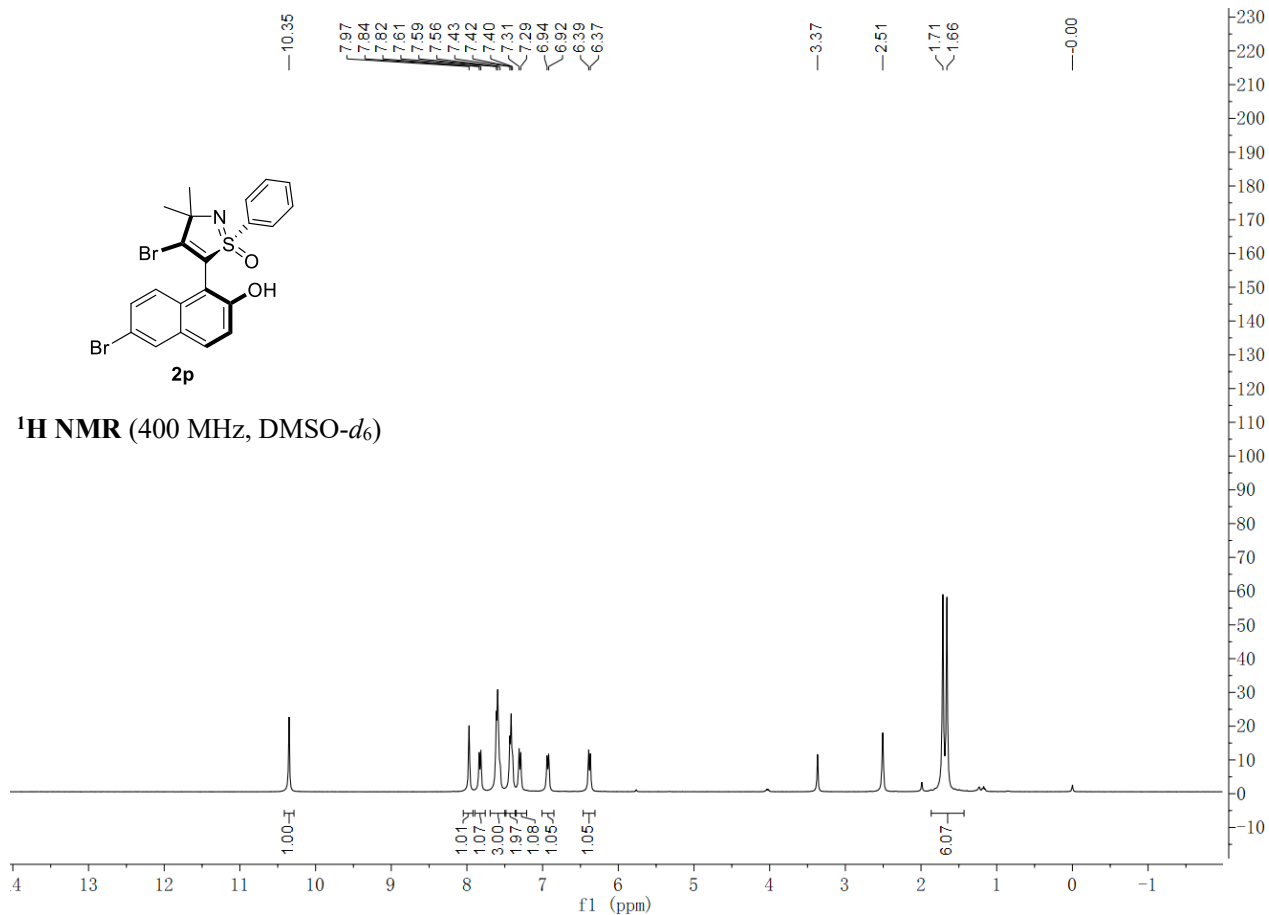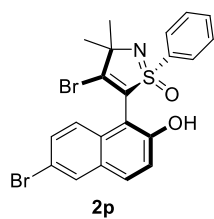

<sup>13</sup>C NMR (100 MHz, DMSO-*d*<sub>6</sub>)

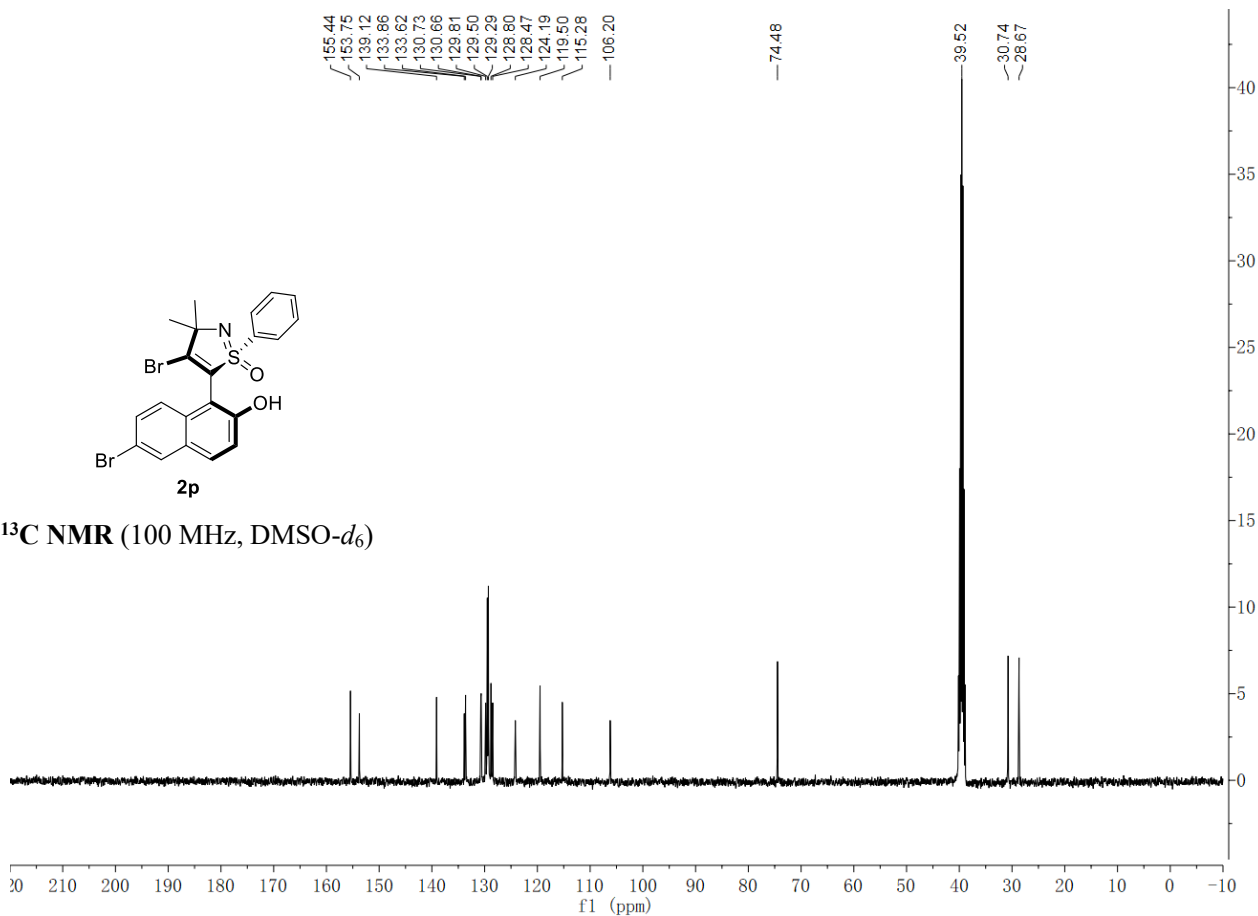

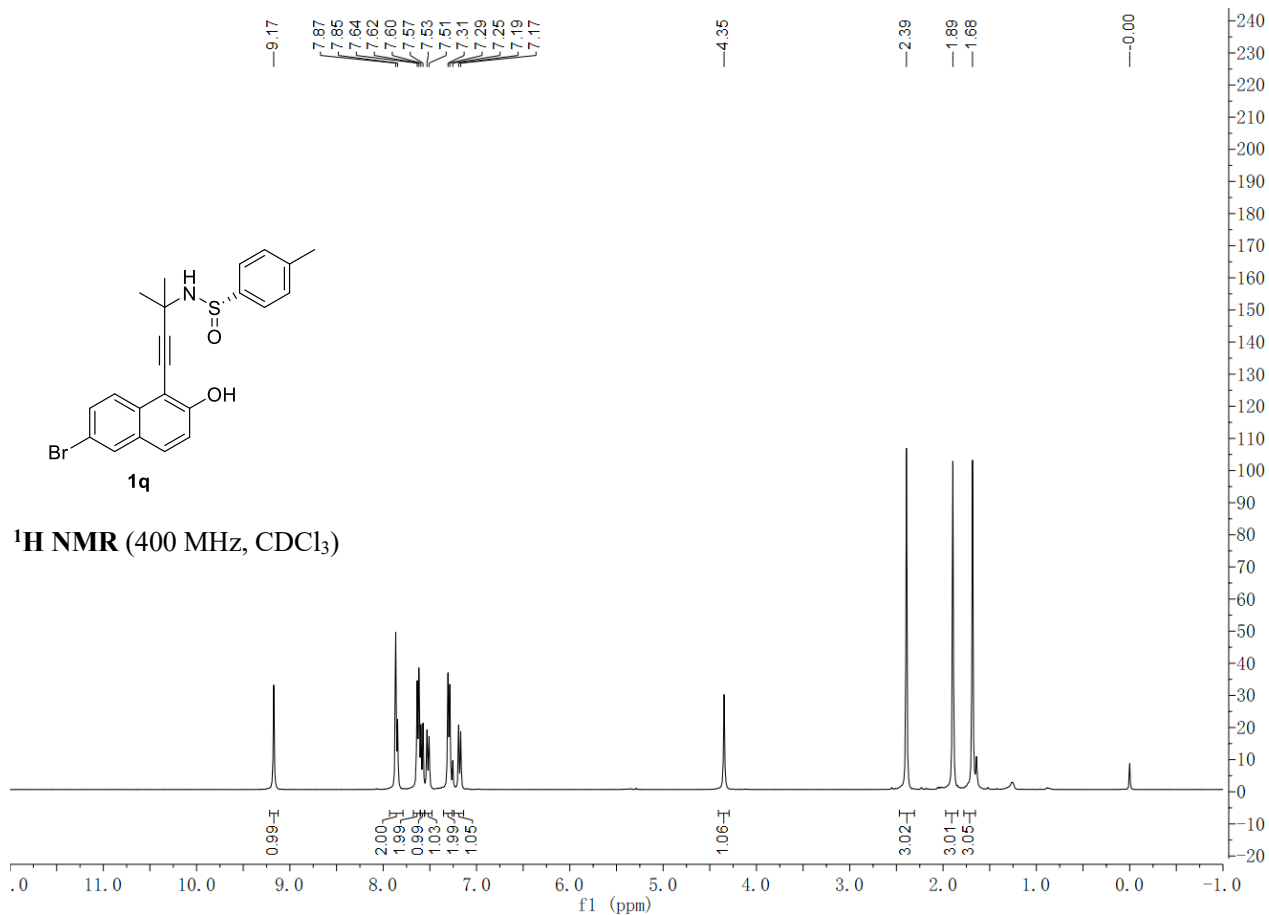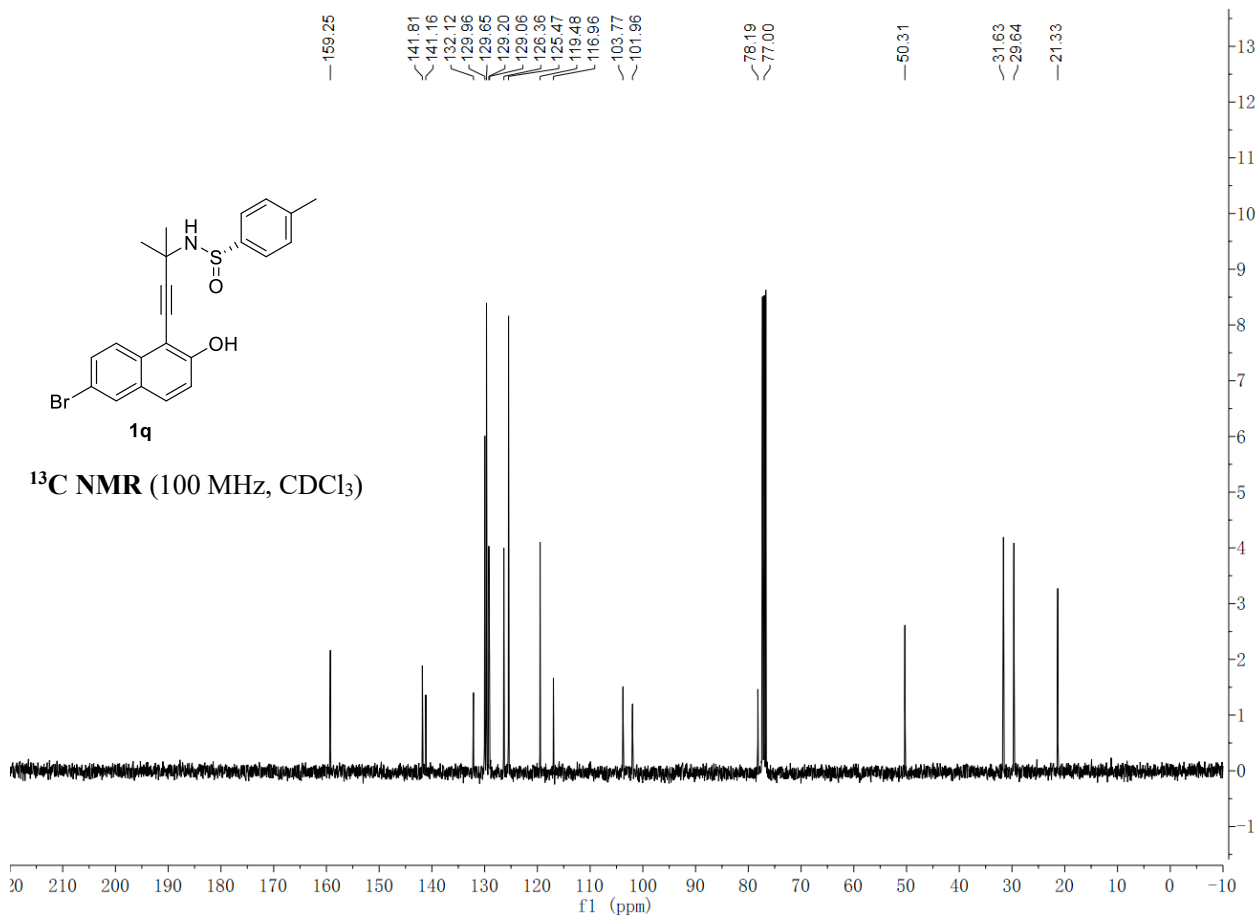

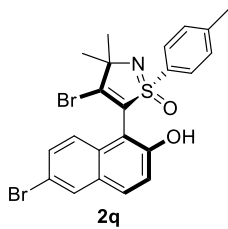

**<sup>1</sup>H NMR (400 MHz, CDCl<sub>3</sub>)**

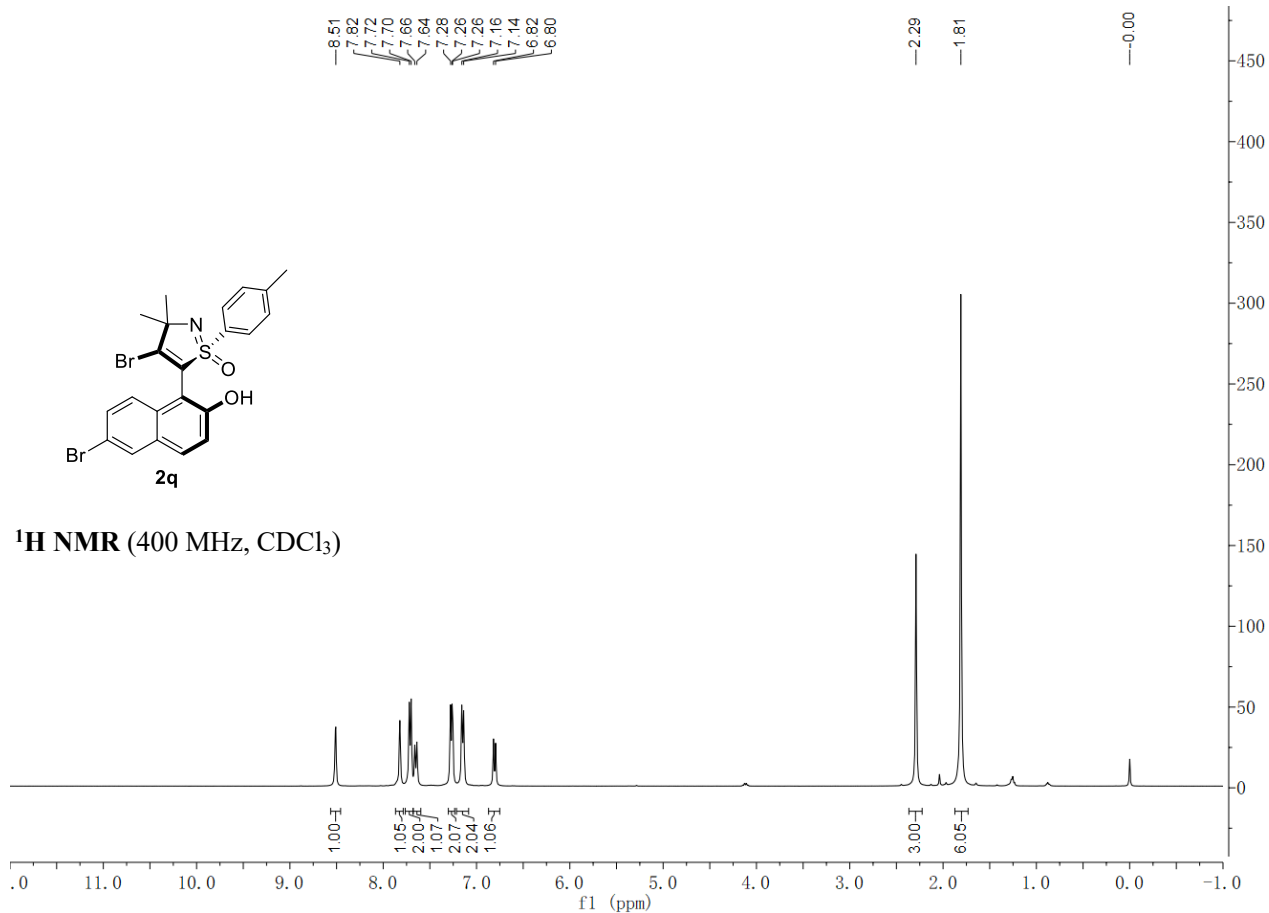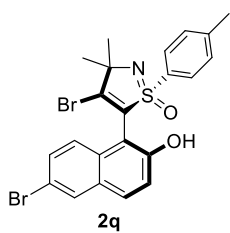

**<sup>13</sup>C NMR (100 MHz, CDCl<sub>3</sub>)**

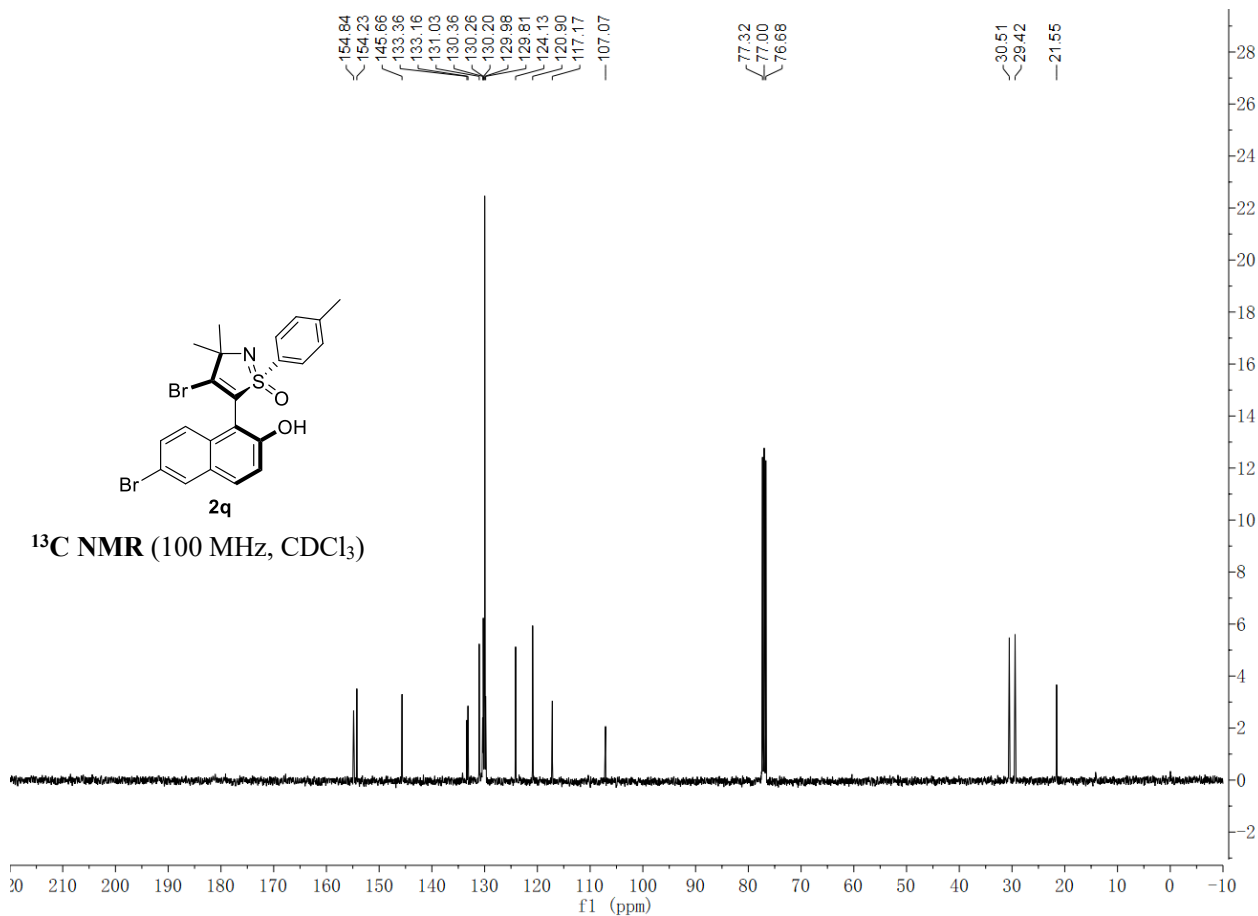

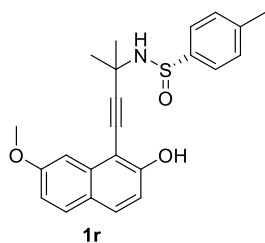

**<sup>1</sup>H NMR (400 MHz, CDCl<sub>3</sub>)**

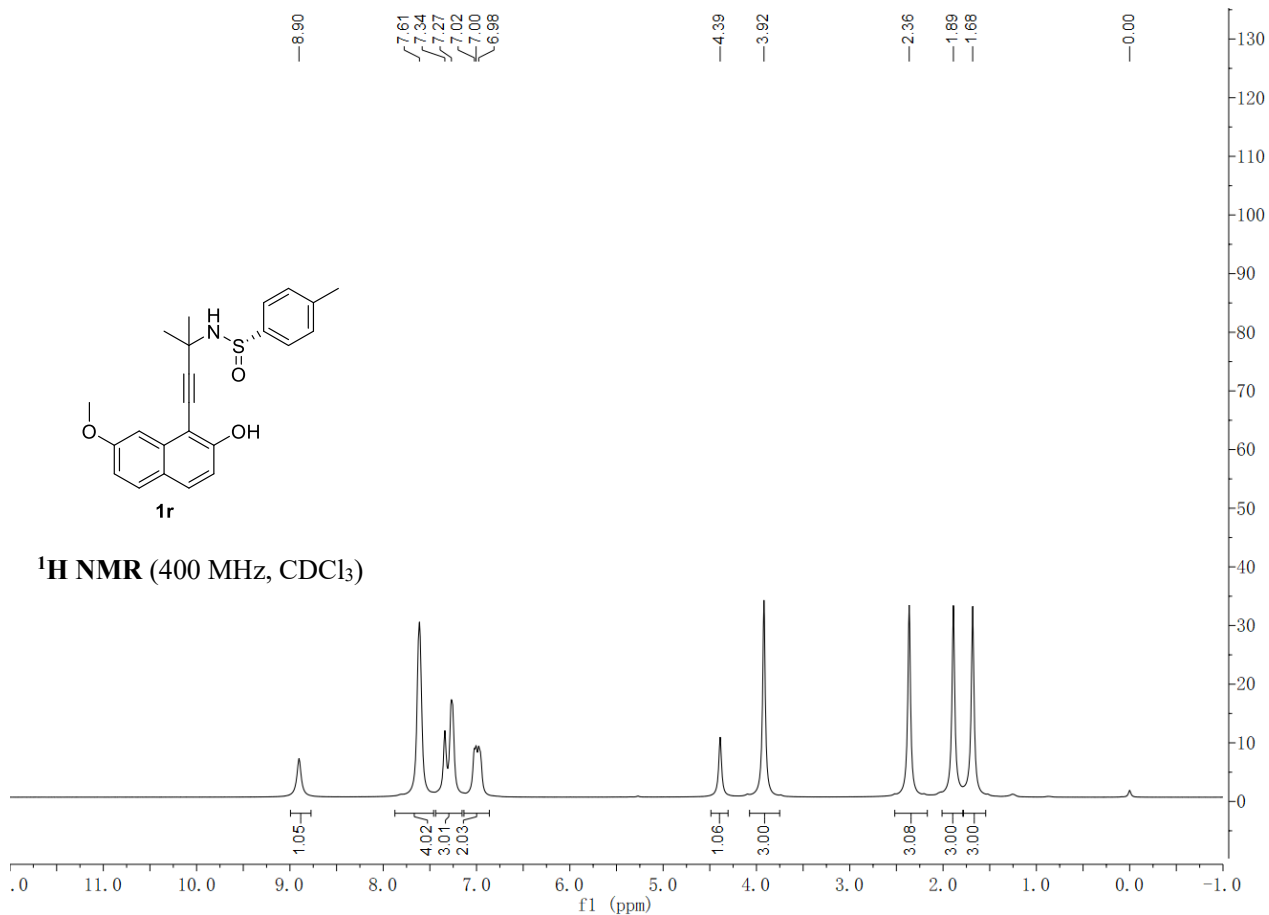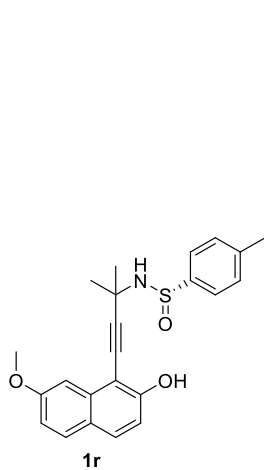

**<sup>13</sup>C NMR (100 MHz, CDCl<sub>3</sub>)**

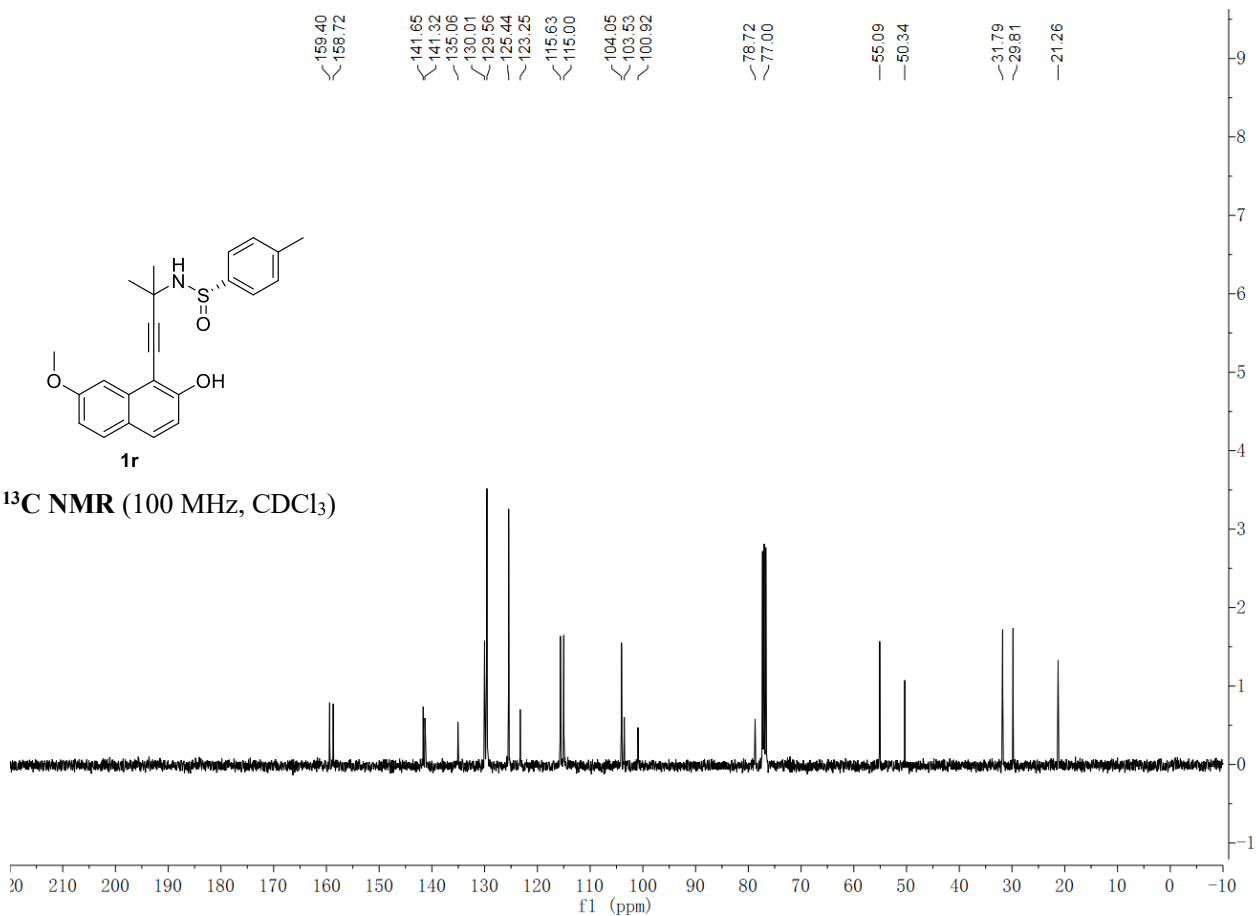

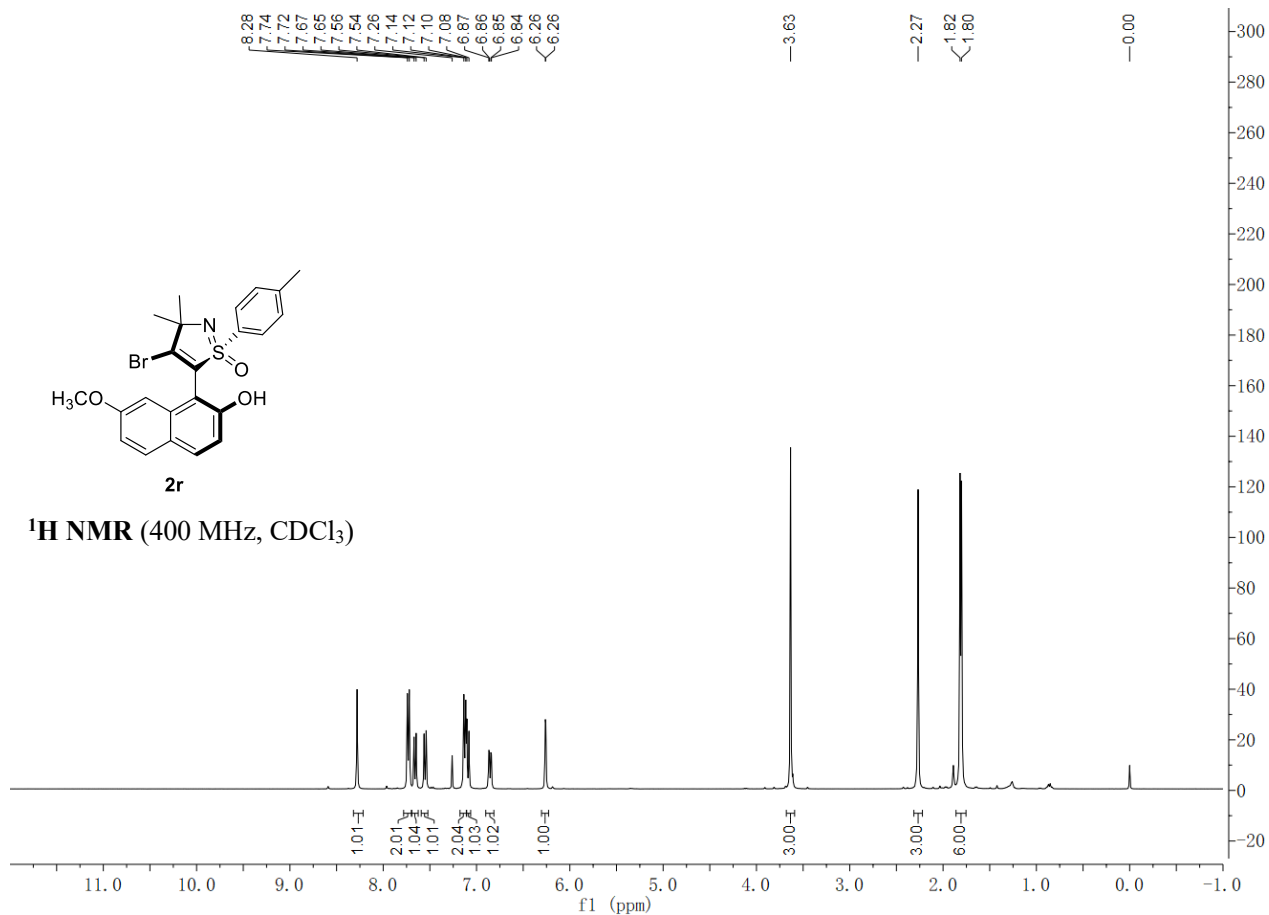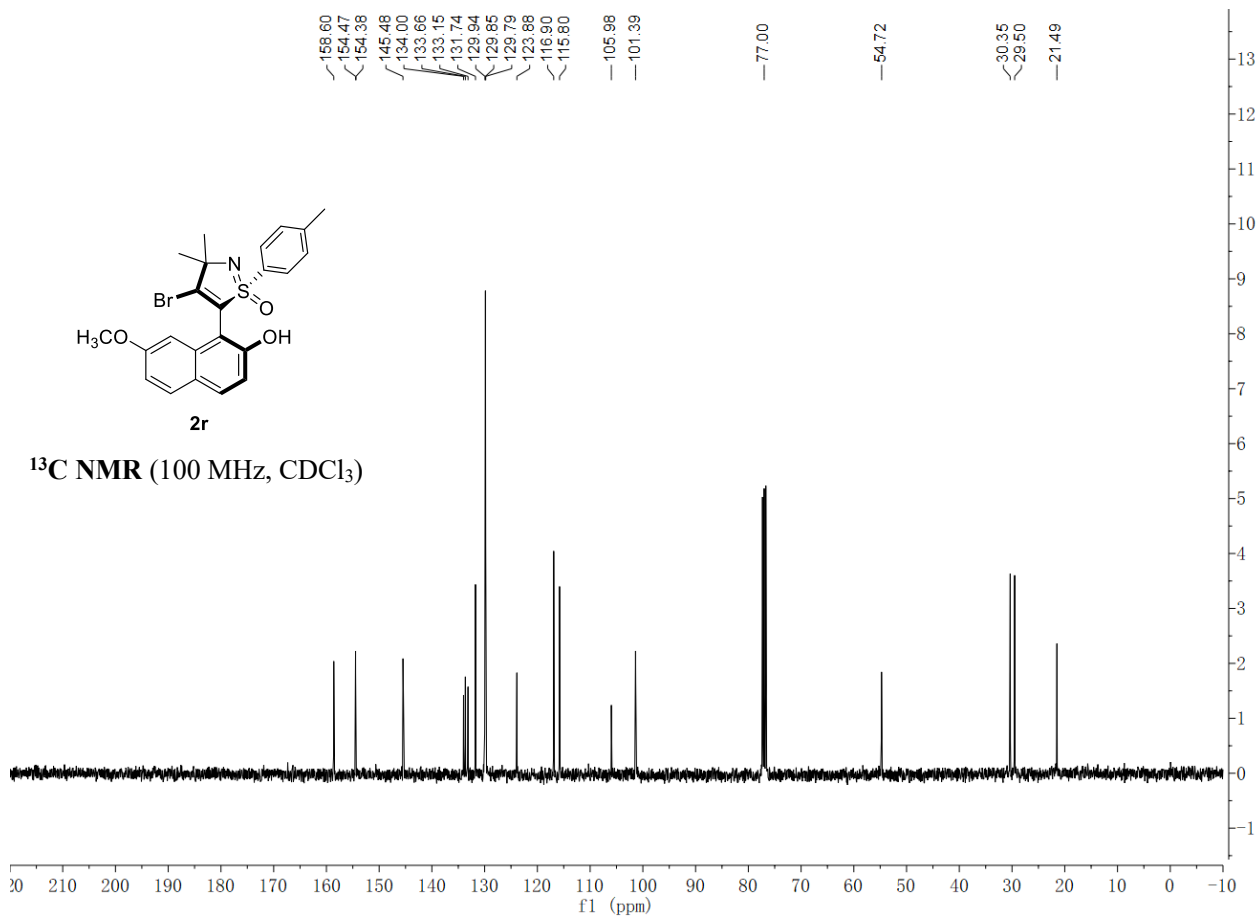

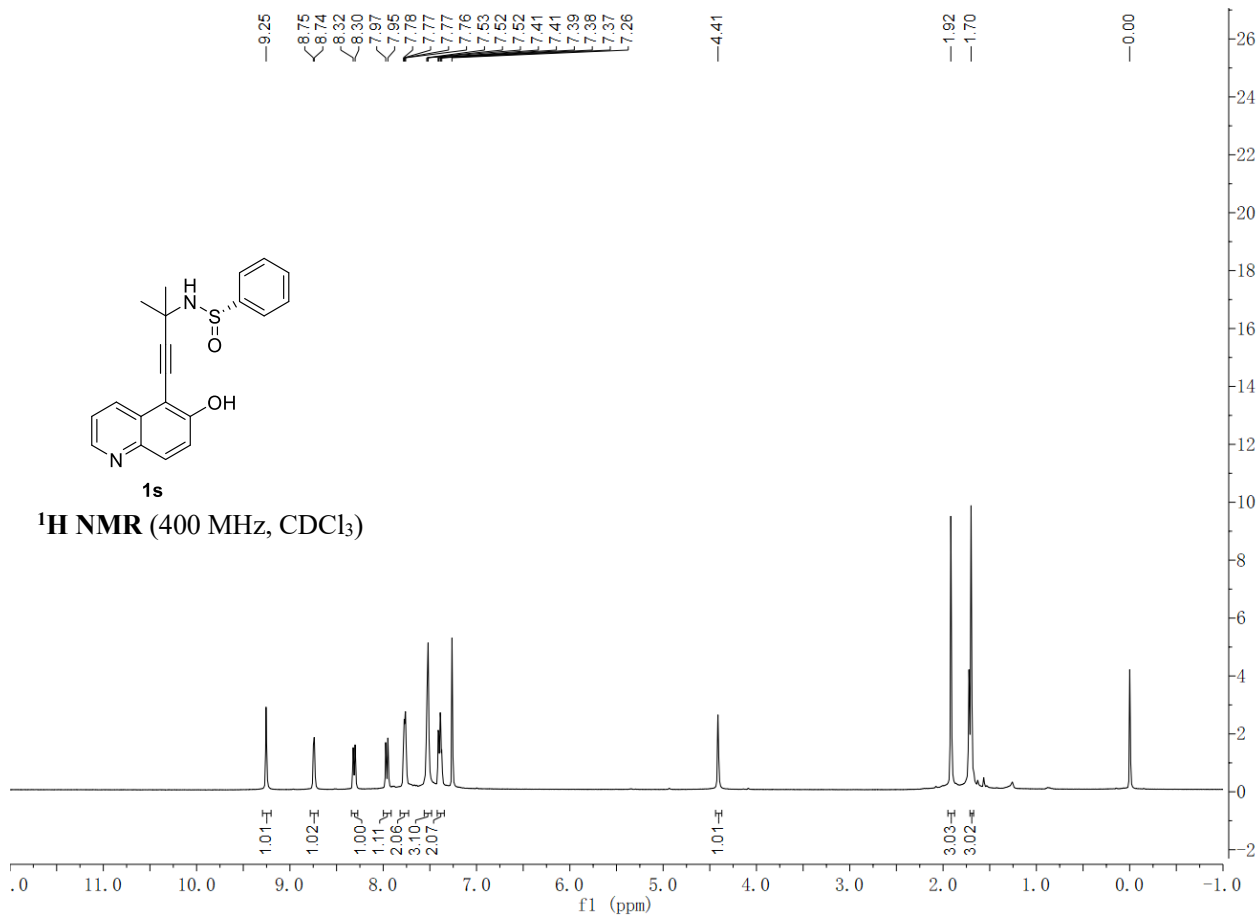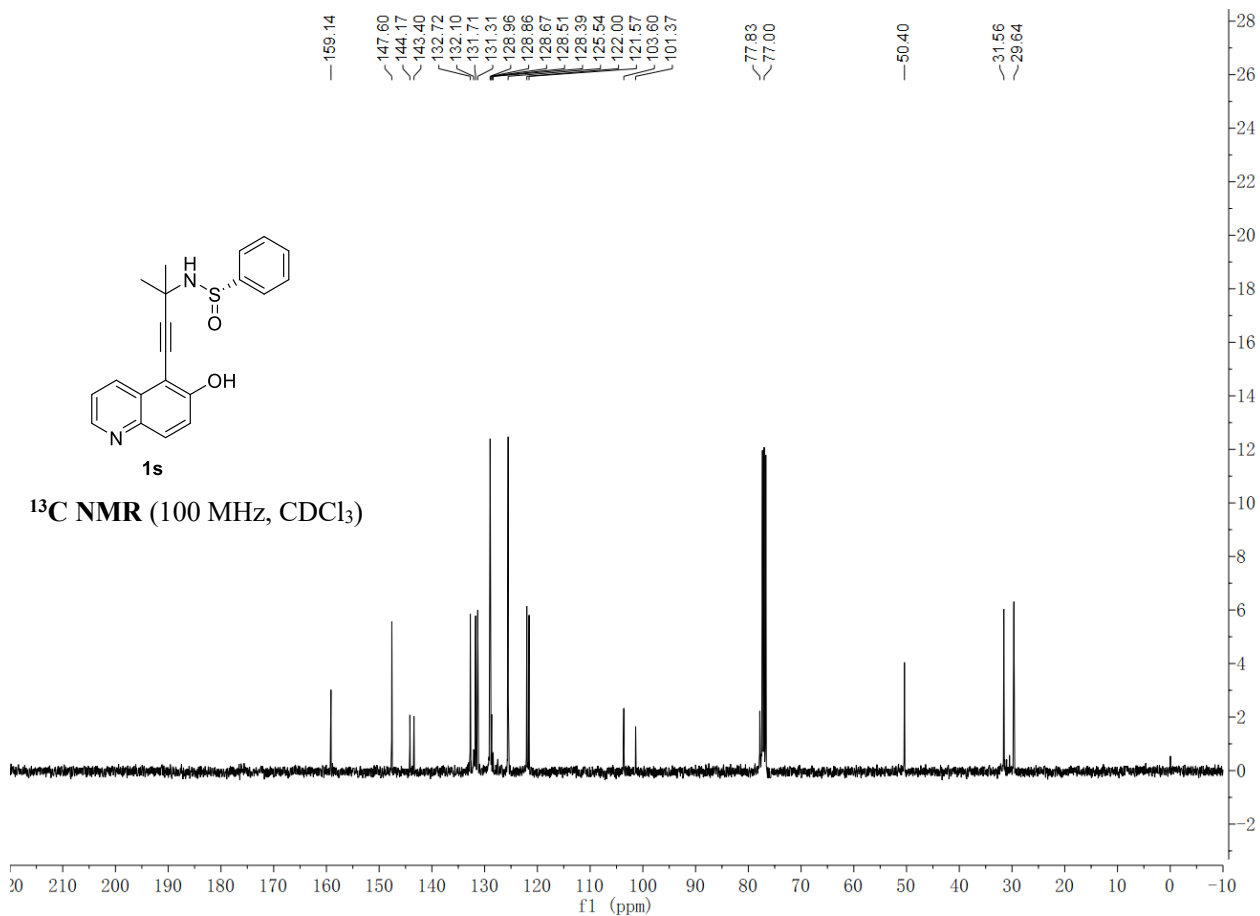

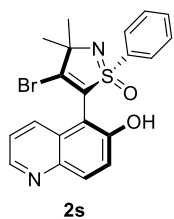

<sup>1</sup>H NMR (400 MHz, CDCl<sub>3</sub>)

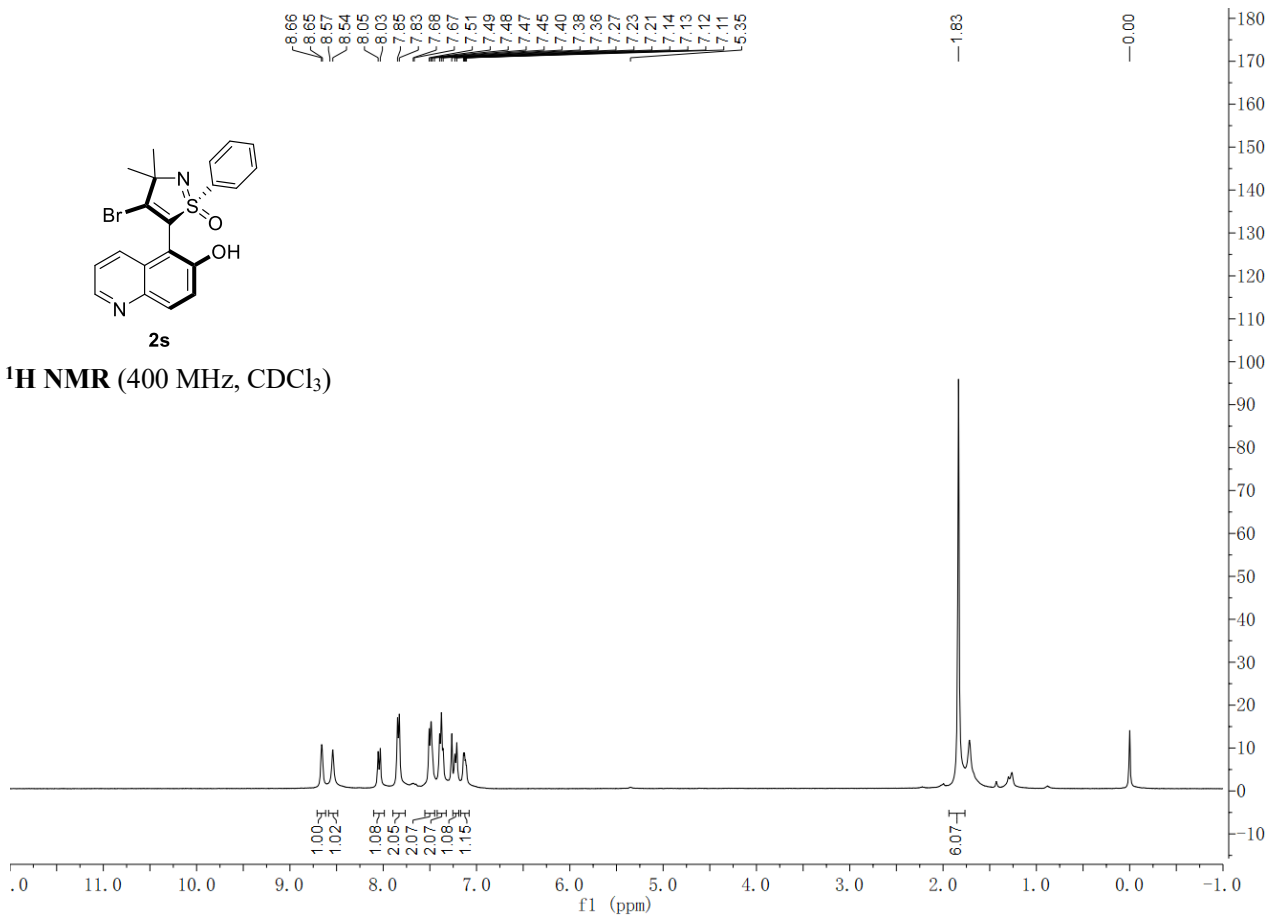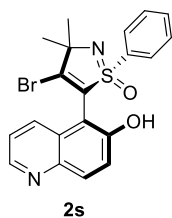

<sup>13</sup>C NMR (100 MHz, CDCl<sub>3</sub>)

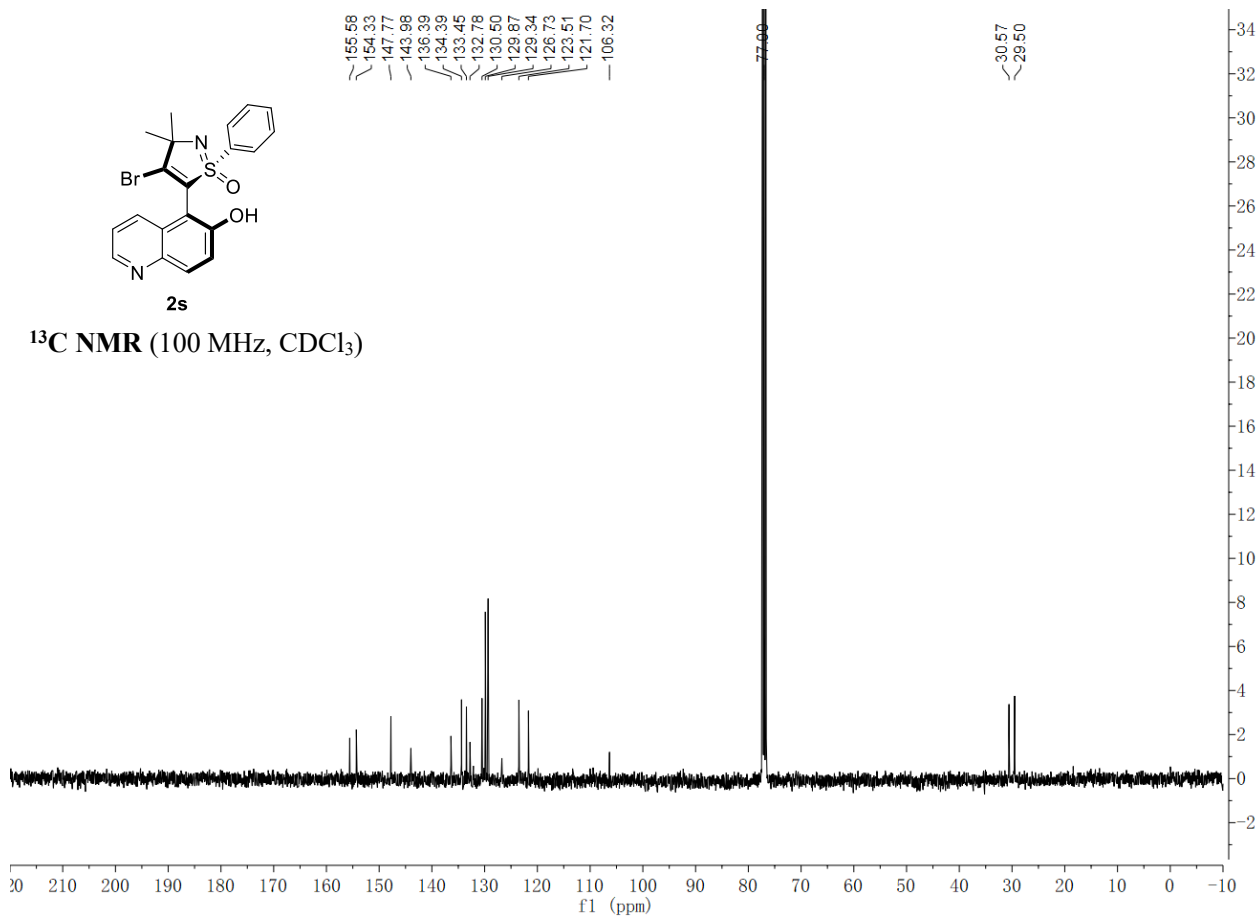

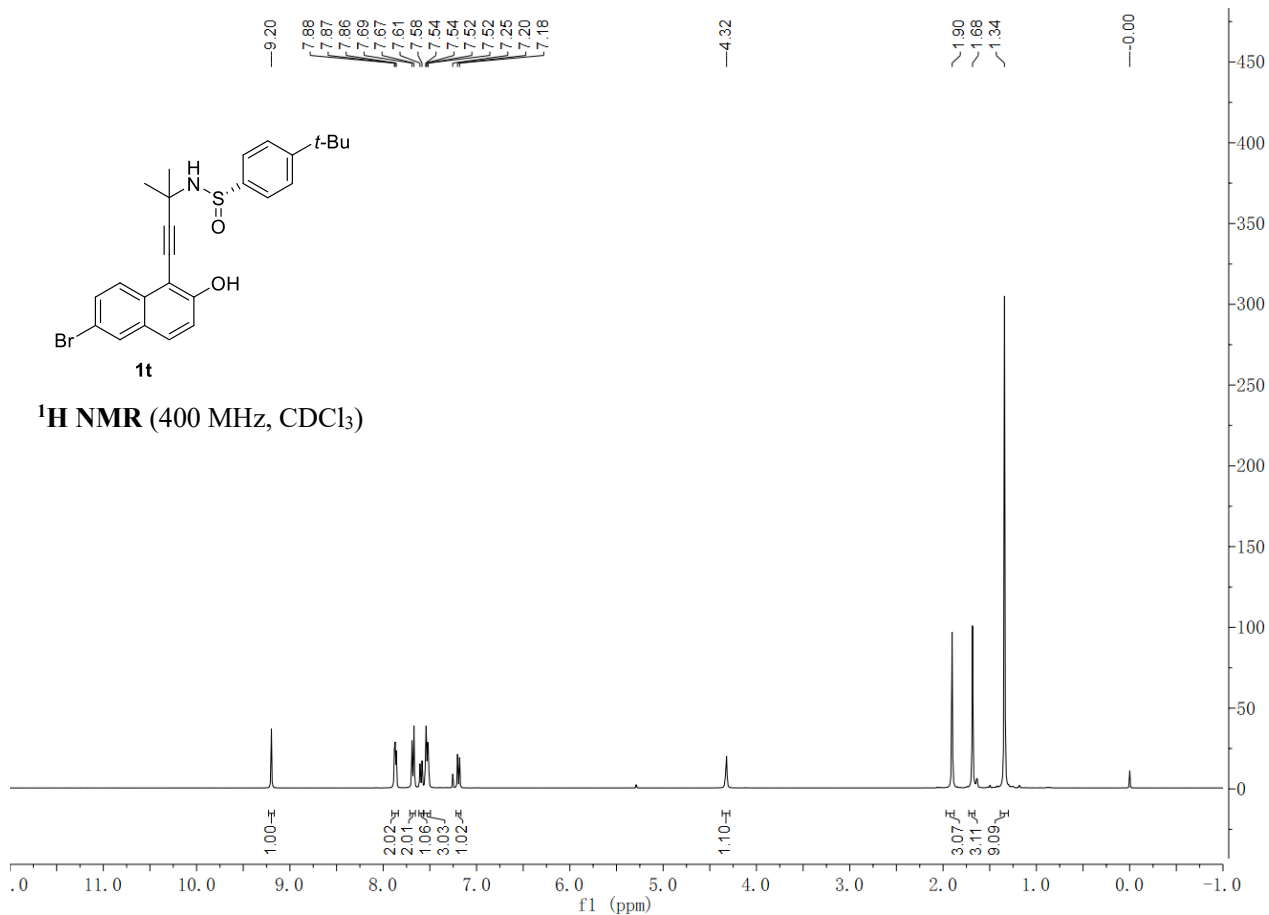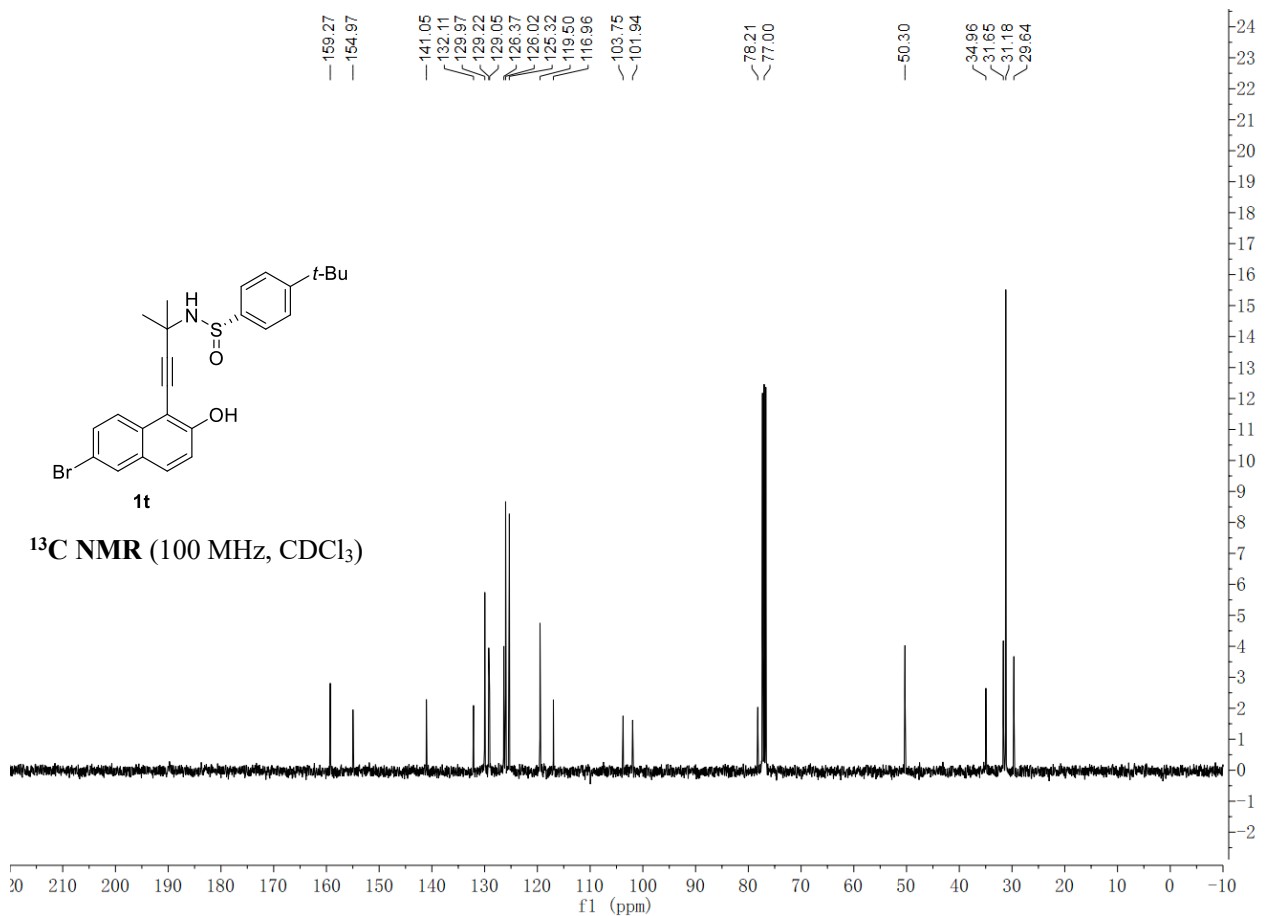



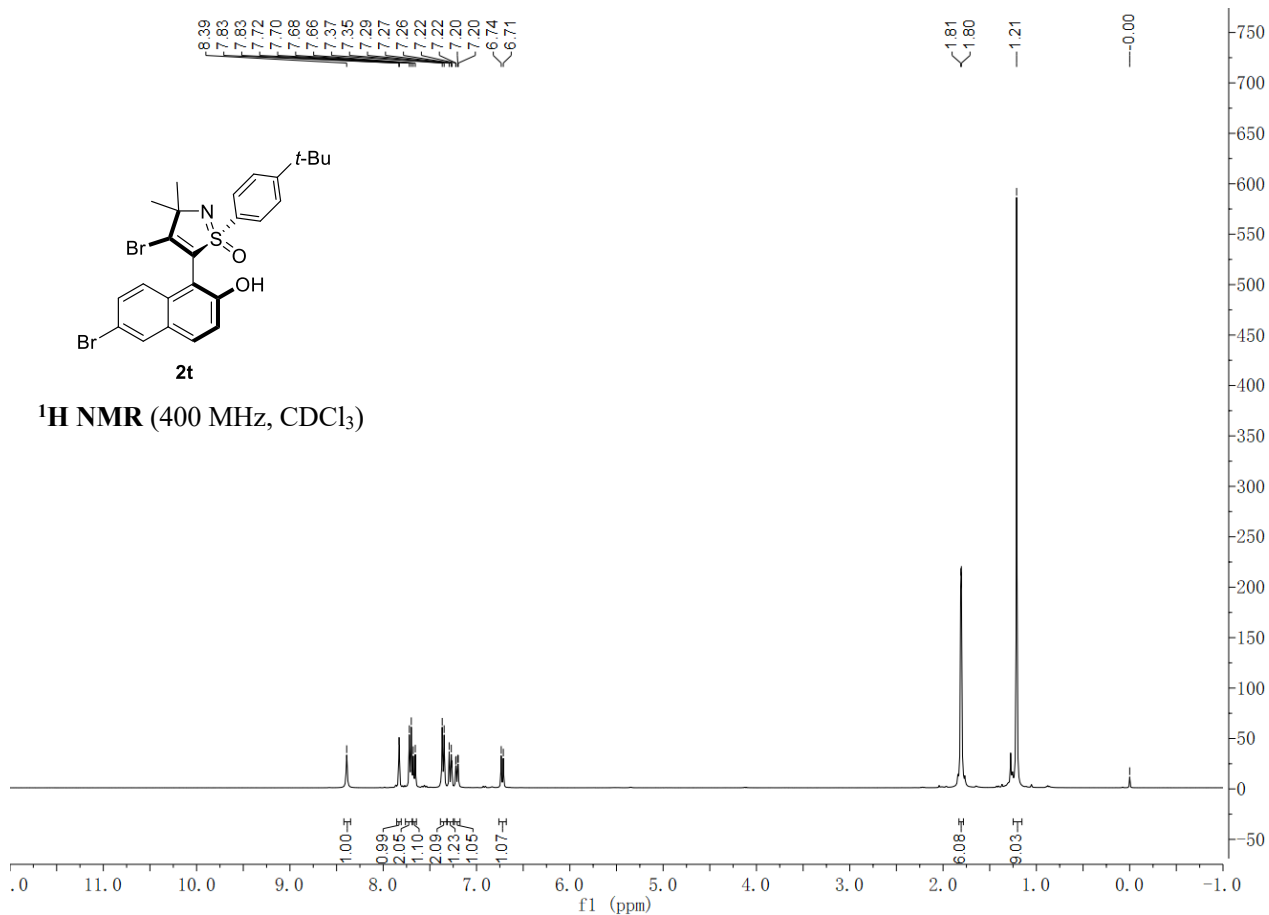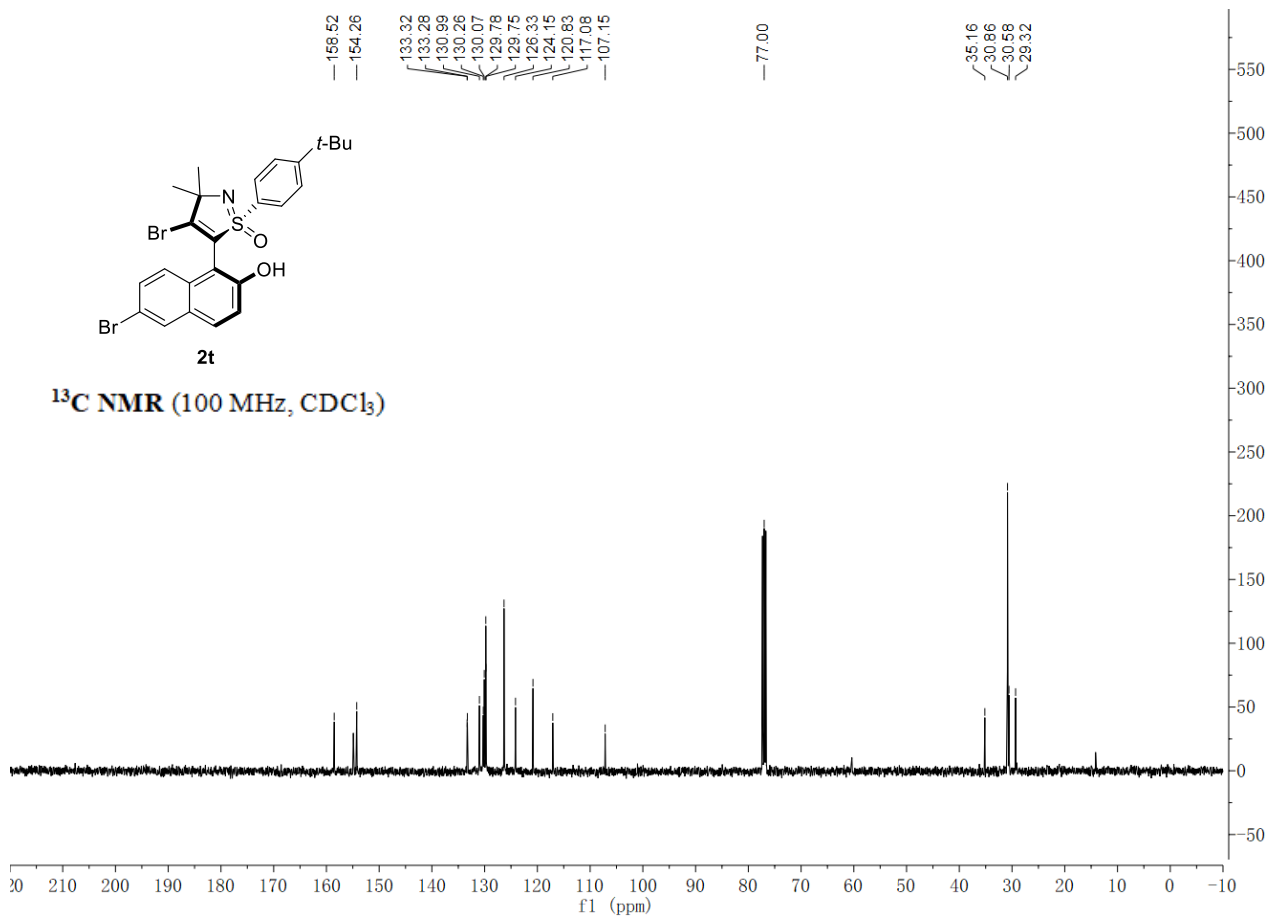

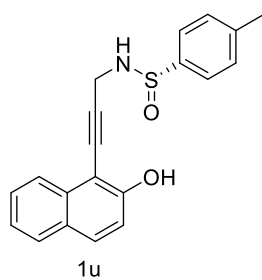

<sup>1</sup>H NMR (400 MHz, CDCl<sub>3</sub>)

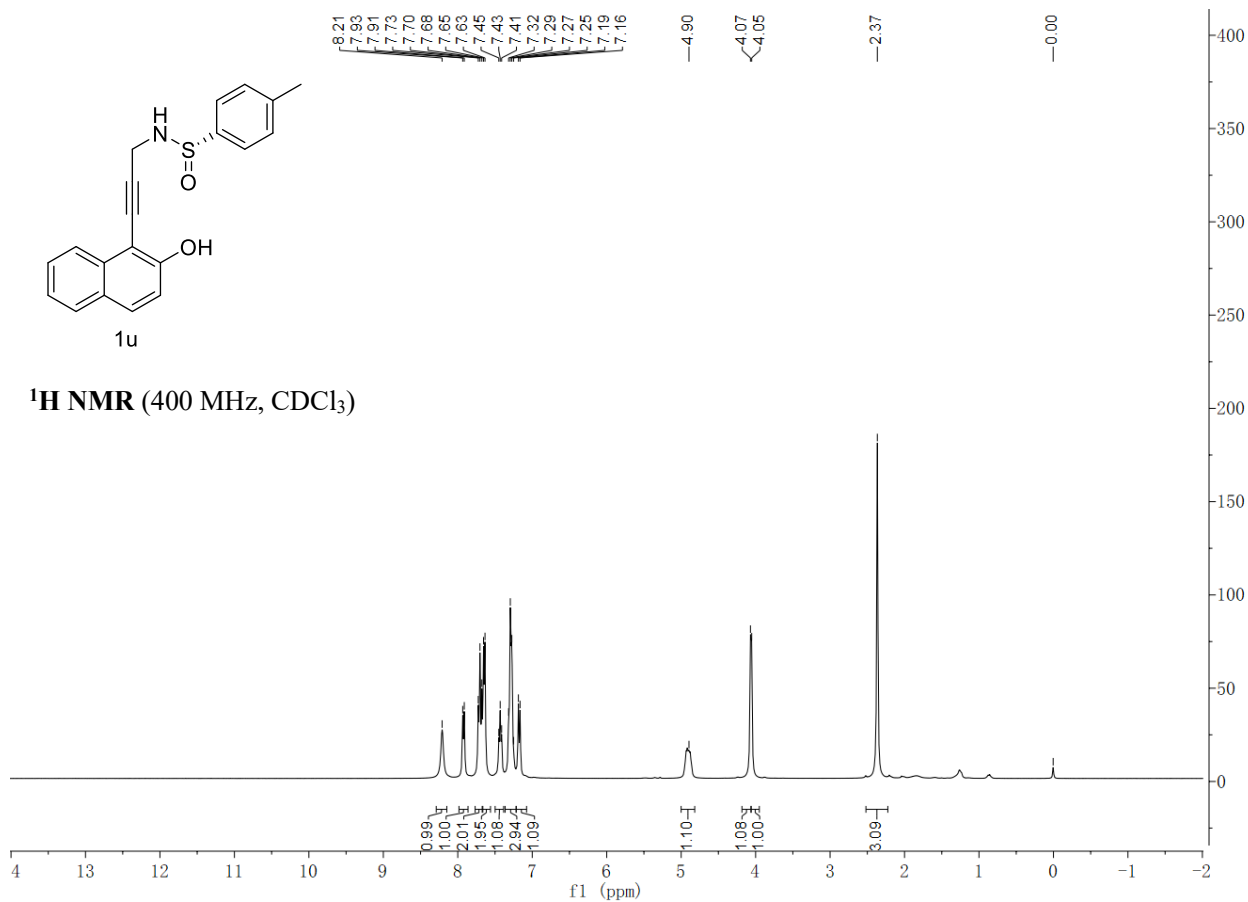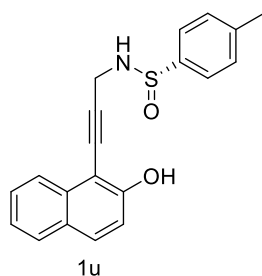

<sup>13</sup>C NMR (100 MHz, CDCl<sub>3</sub>)

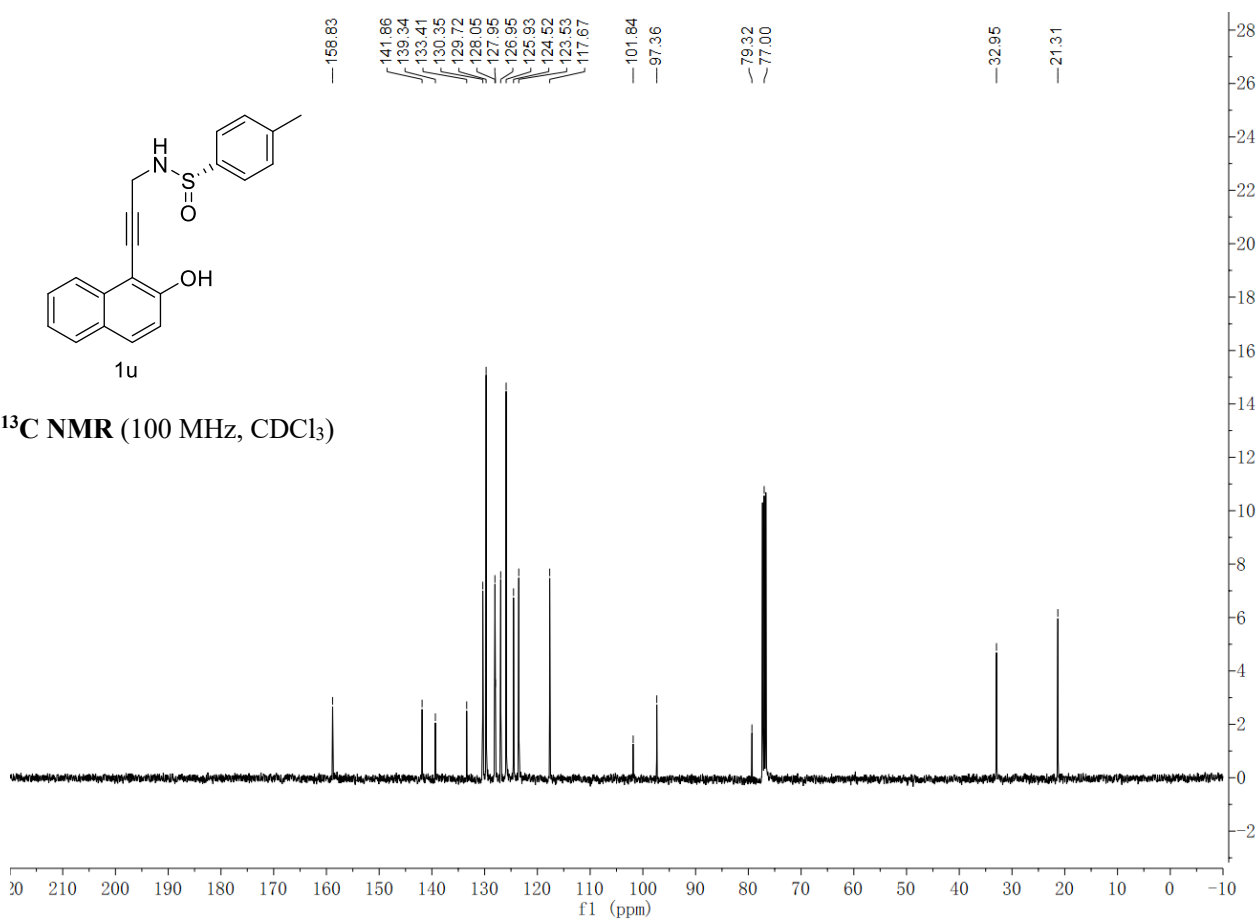

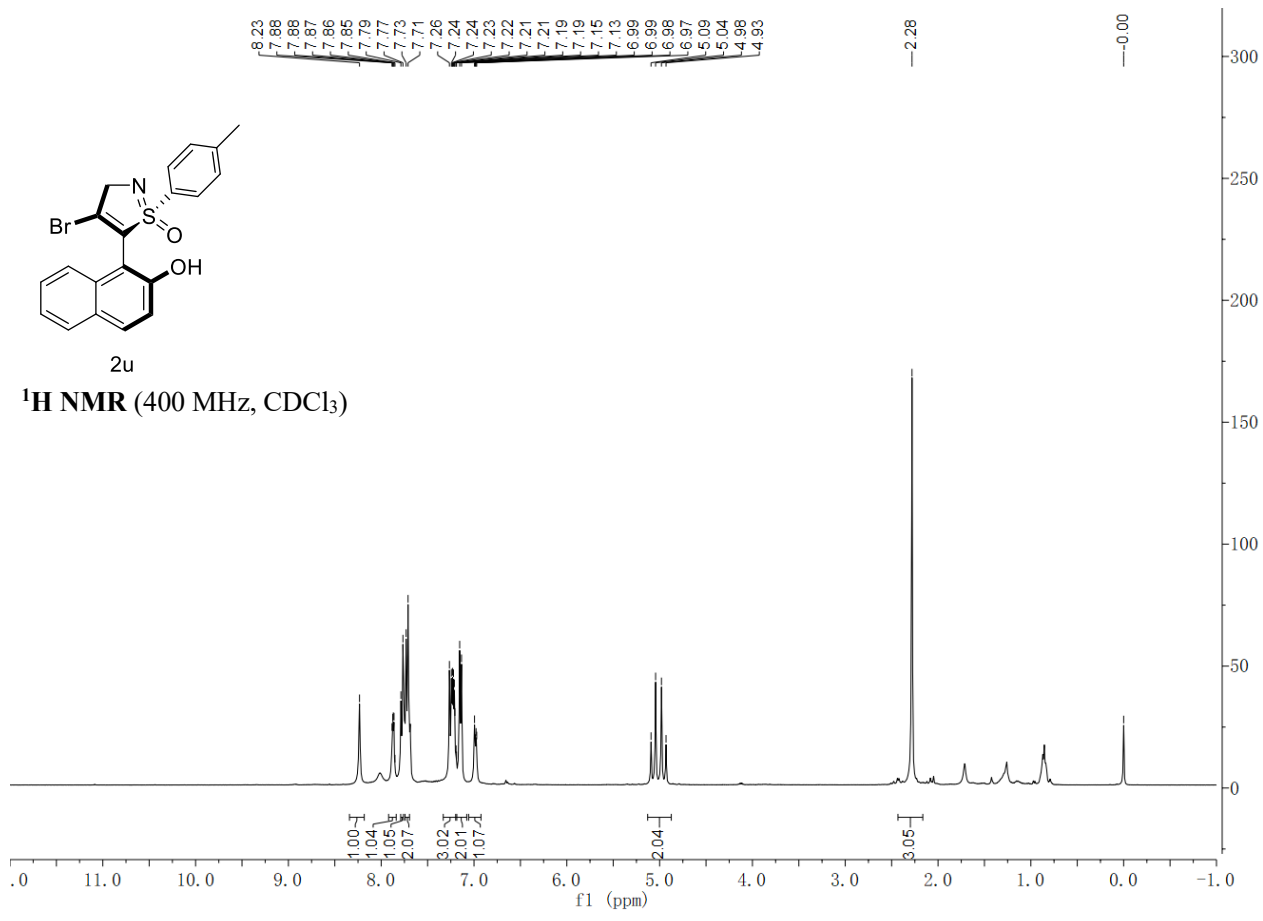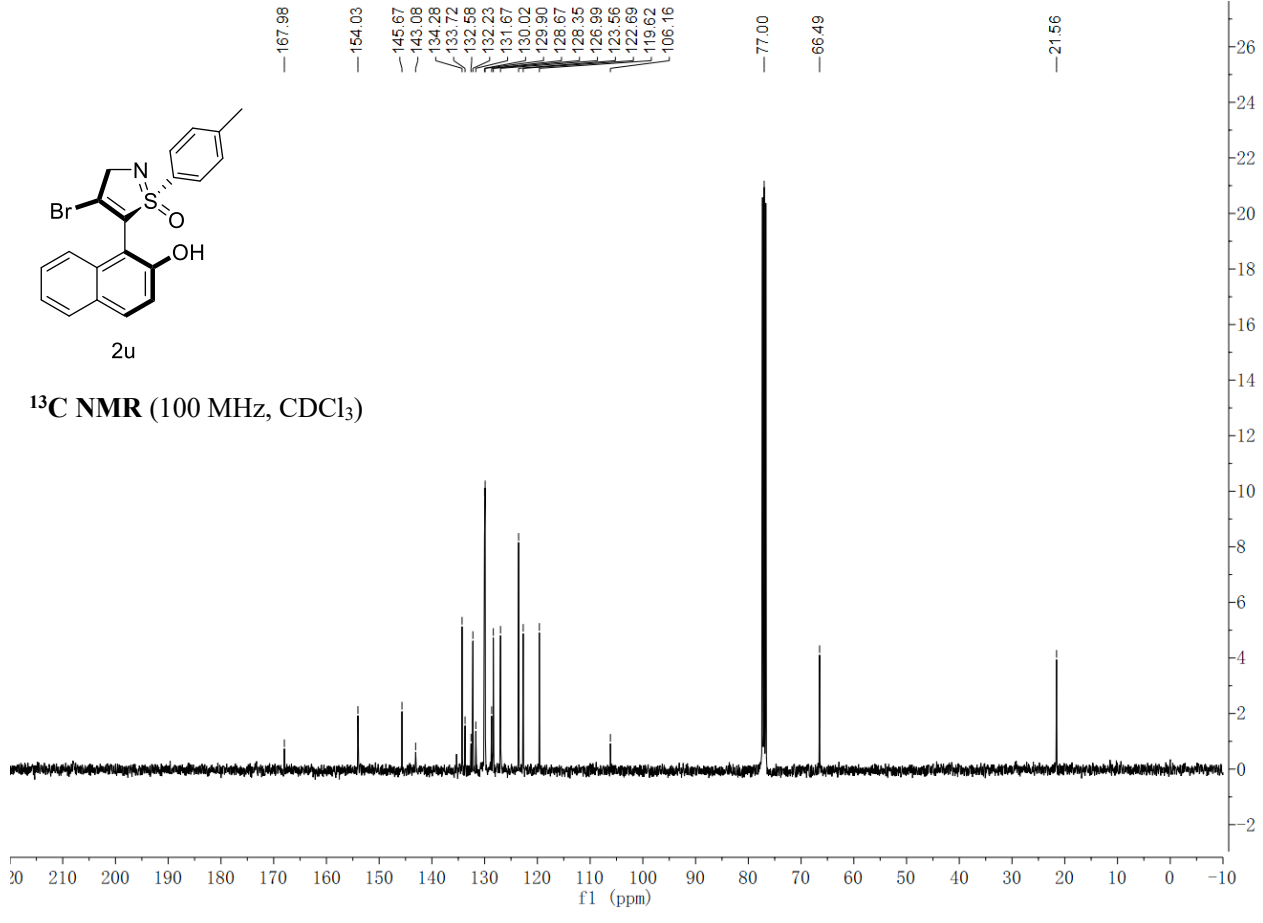

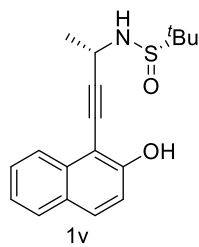

$^1\text{H NMR}$  (400 MHz,  $\text{CDCl}_3$ )

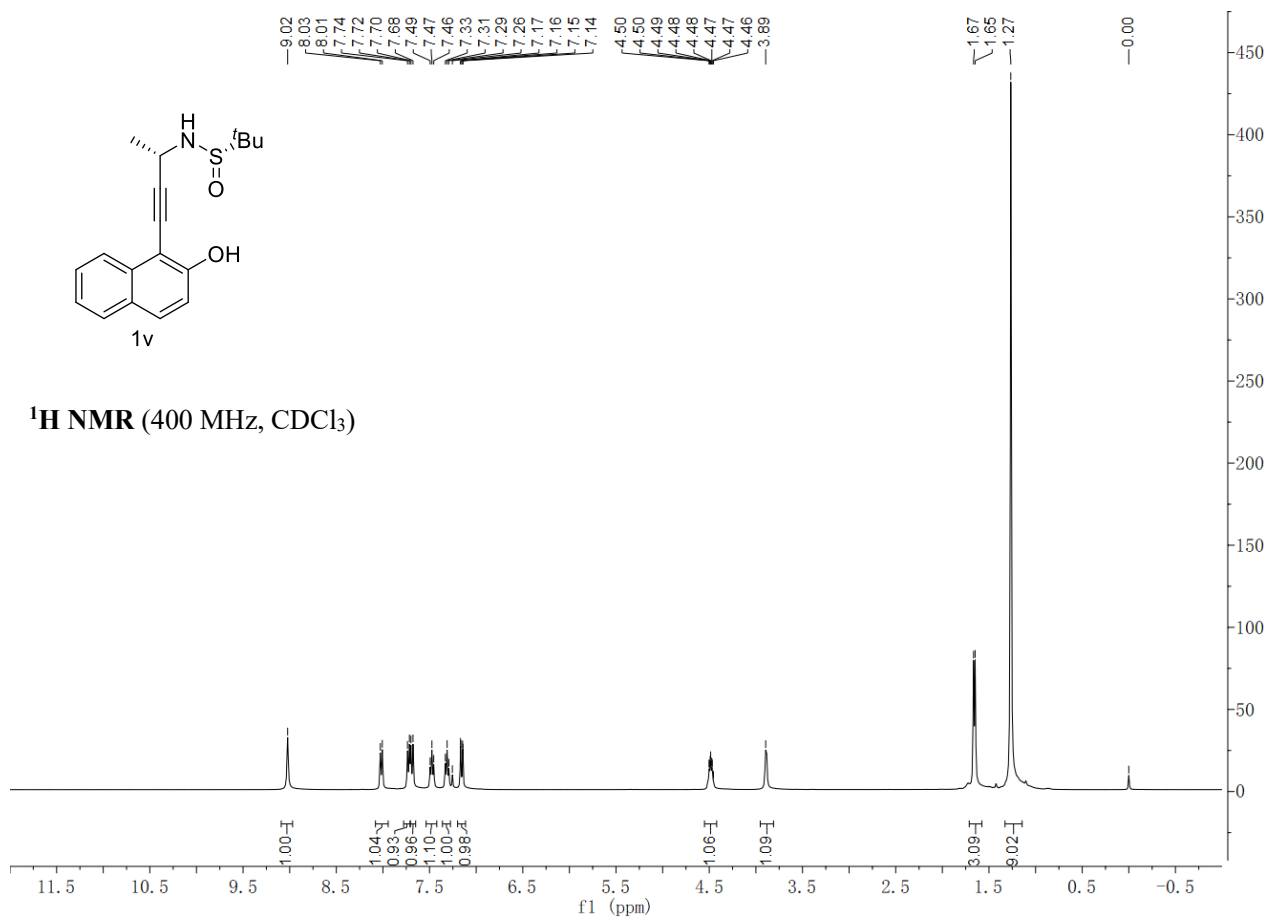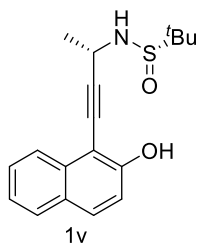

$^{13}\text{C NMR}$  (100 MHz,  $\text{CDCl}_3$ )

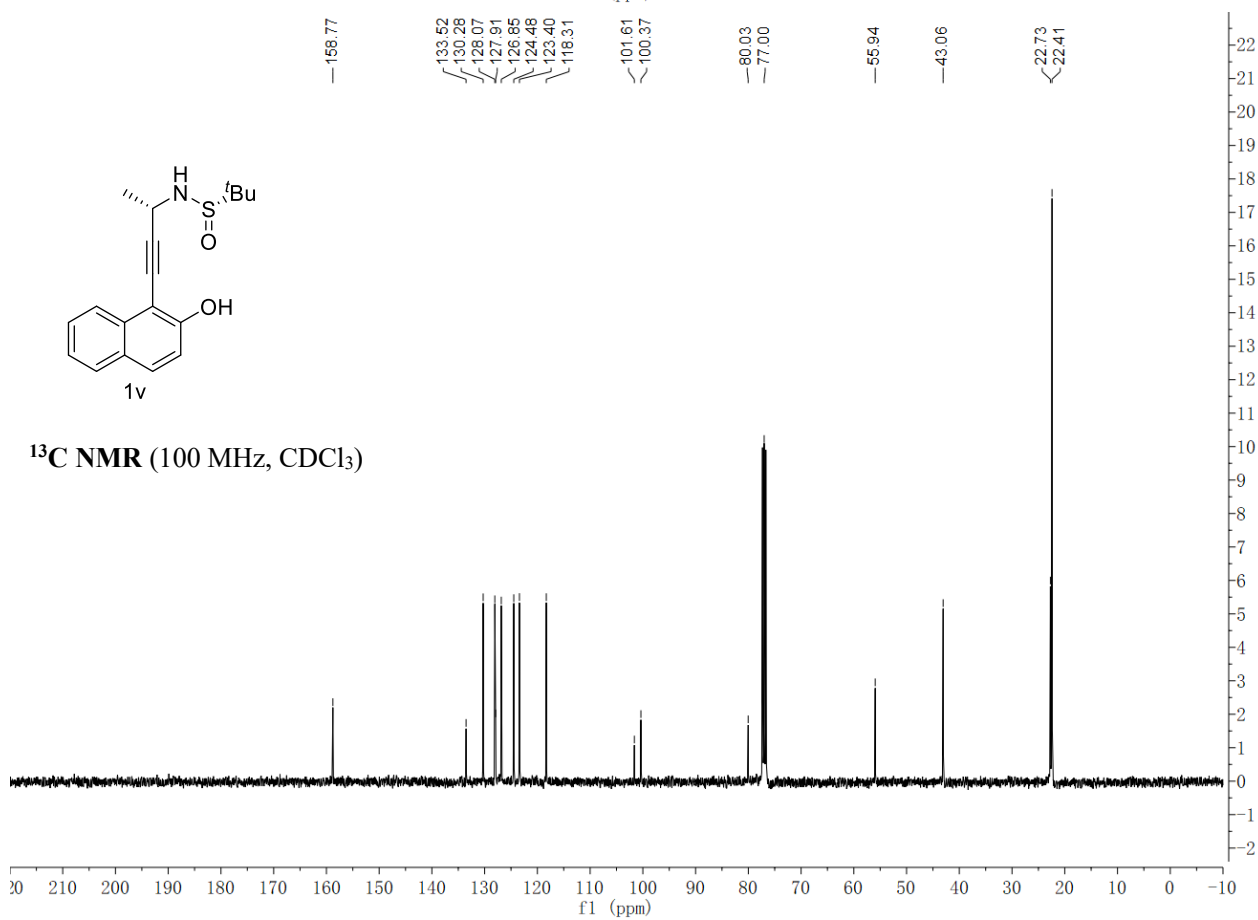

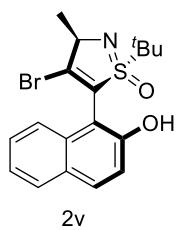

$^1\text{H NMR}$  (400 MHz,  $\text{CDCl}_3$ )

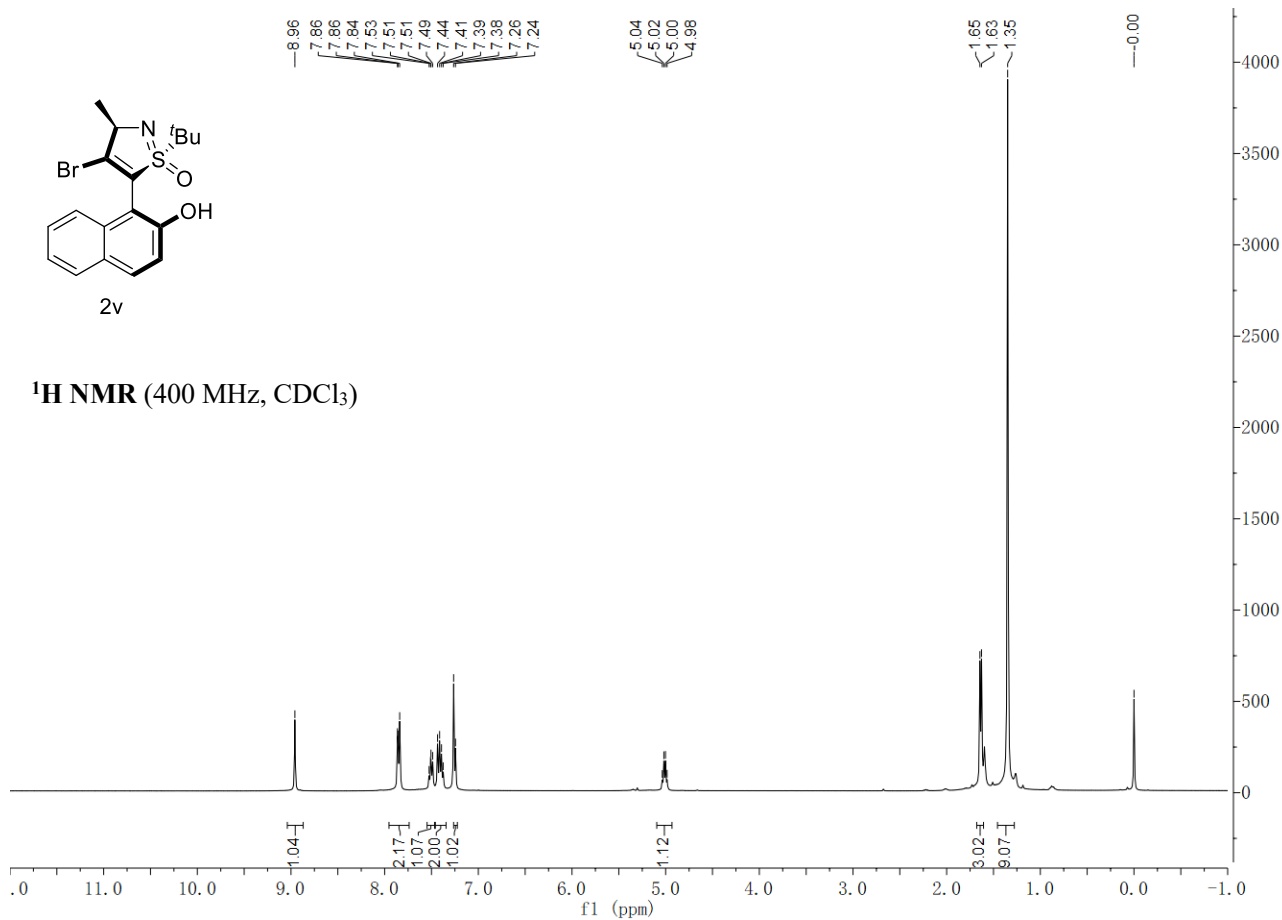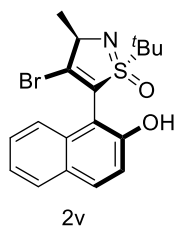

$^{13}\text{C NMR}$  (100 MHz,  $\text{CDCl}_3$ )

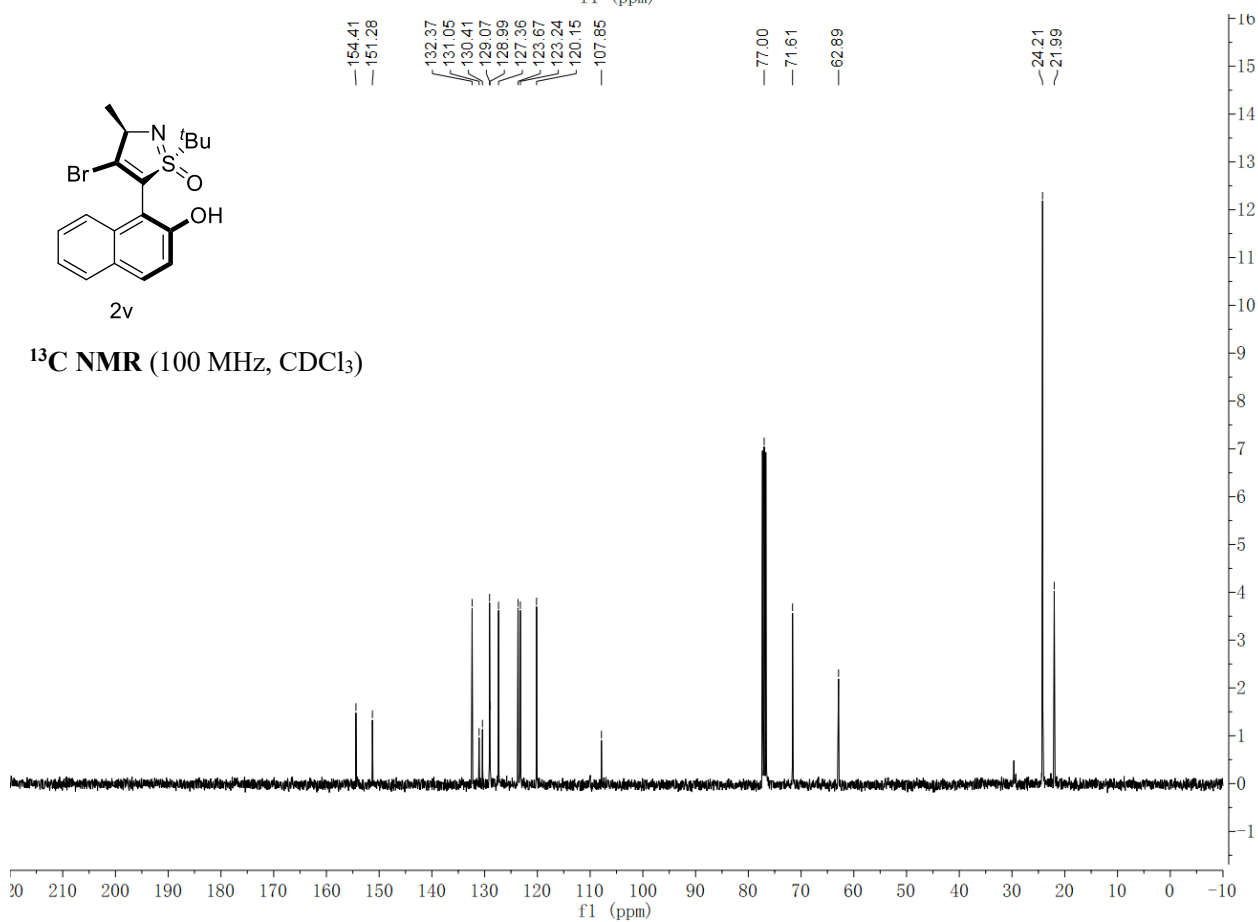

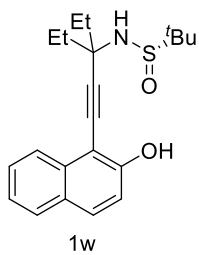

$^1\text{H NMR}$  (400 MHz,  $\text{CDCl}_3$ )

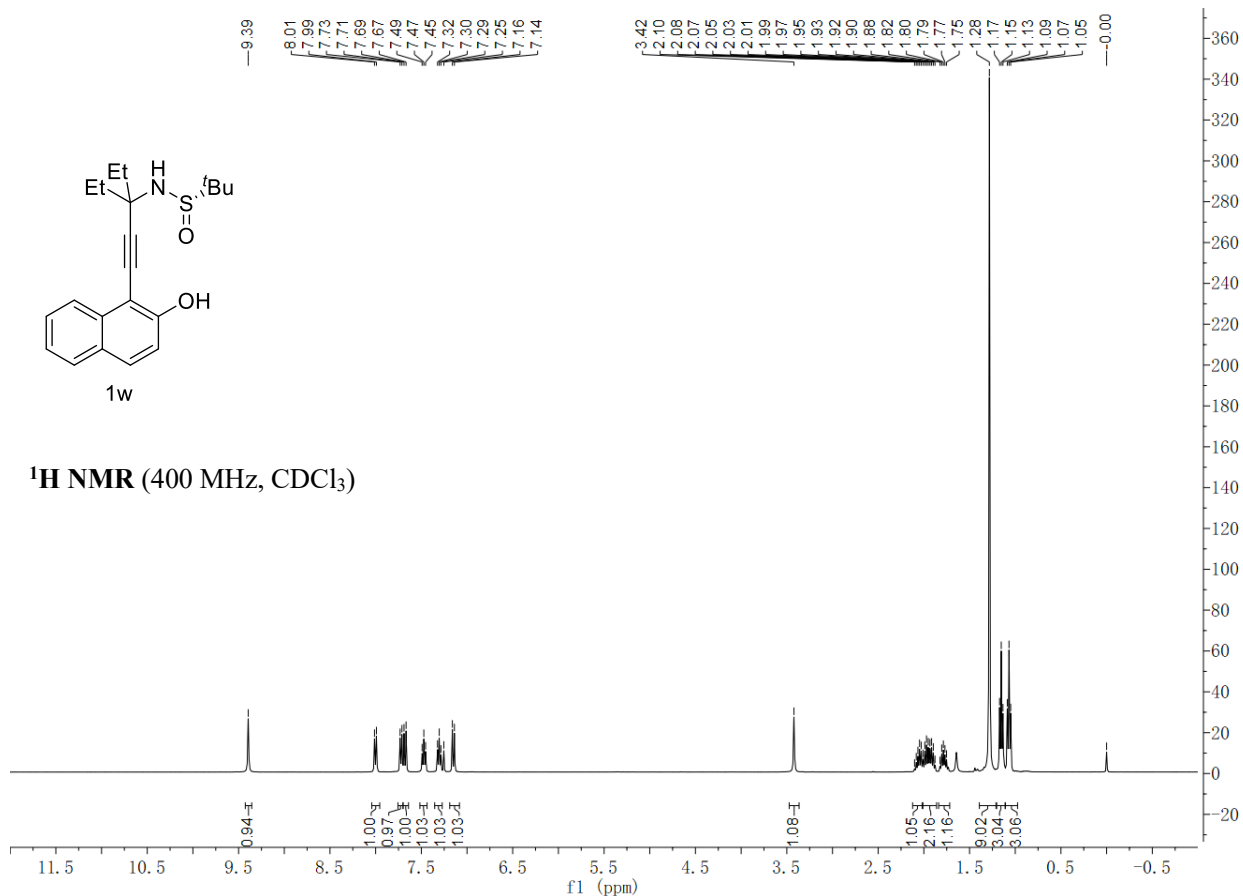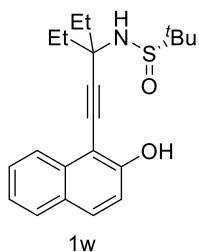

$^{13}\text{C NMR}$  (100 MHz,  $\text{CDCl}_3$ )

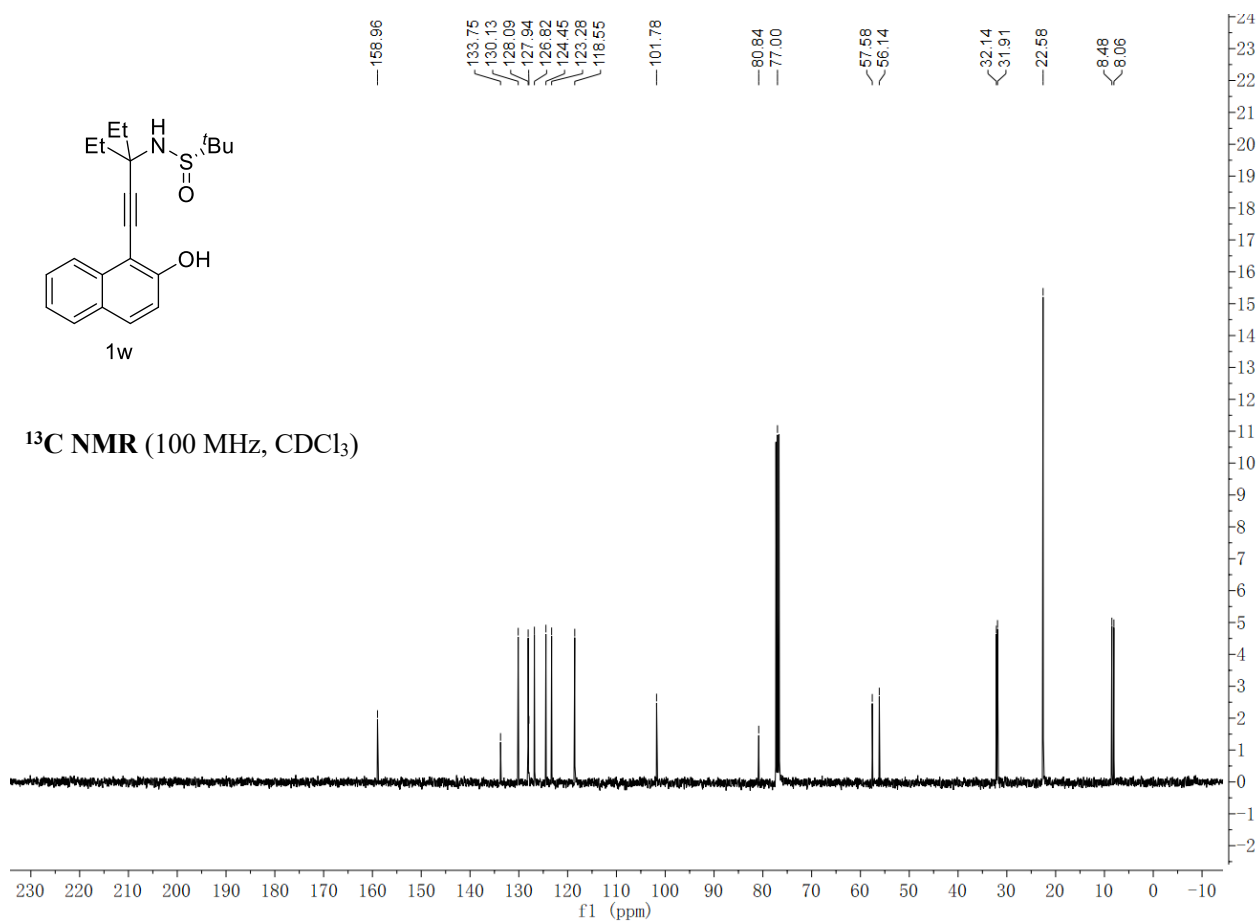

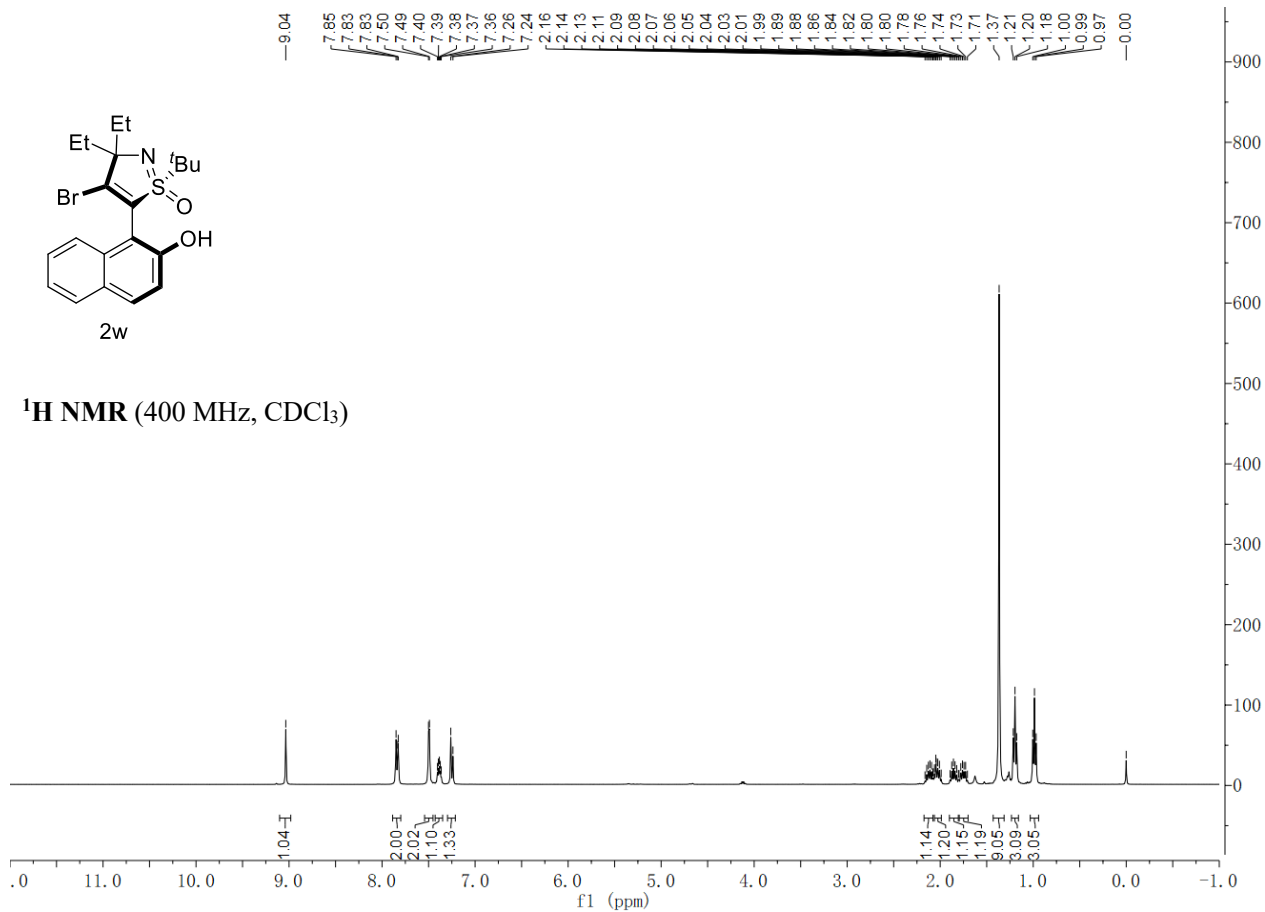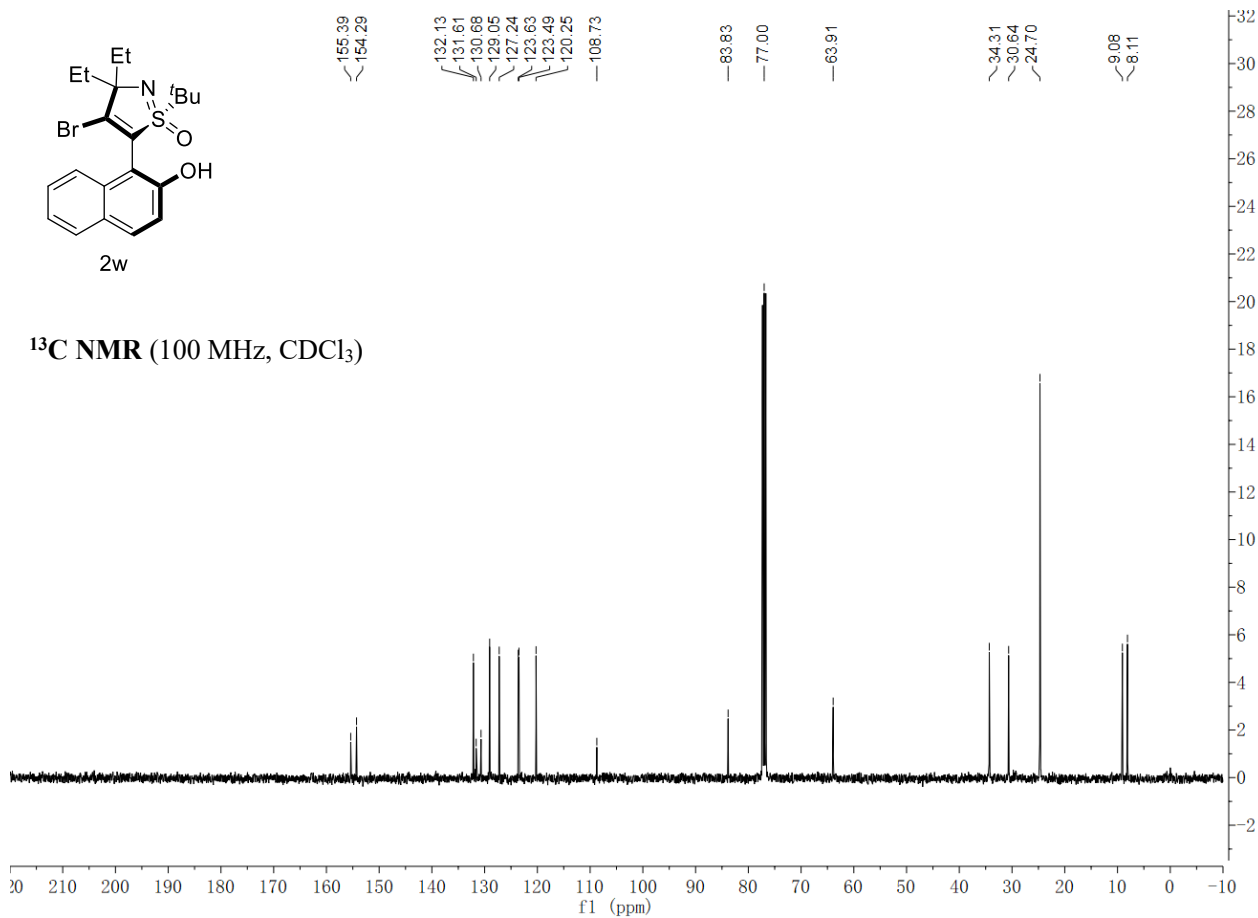

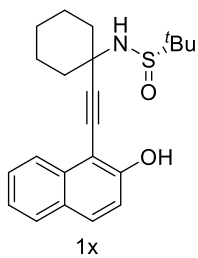

$^1\text{H NMR}$  (400 MHz,  $\text{CDCl}_3$ )

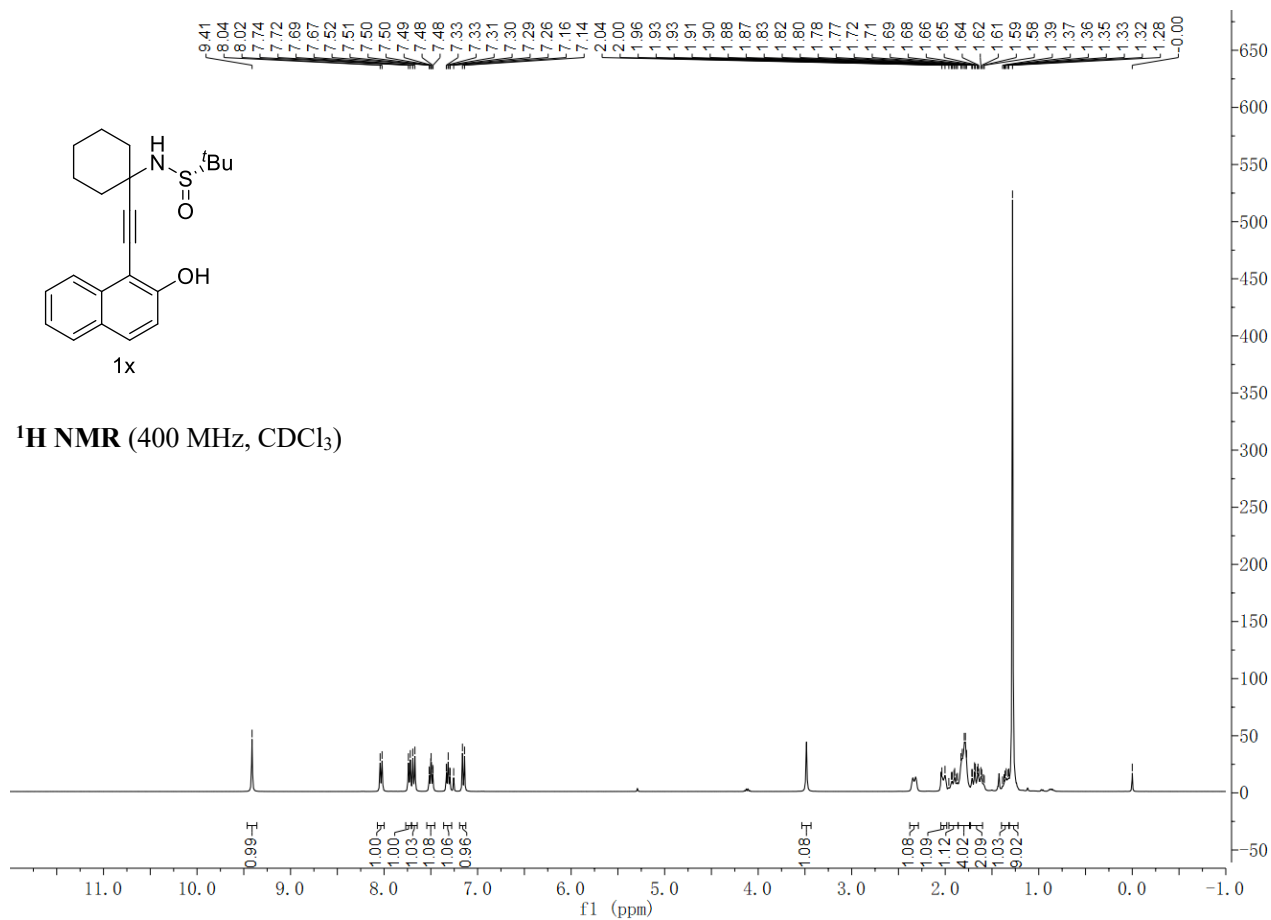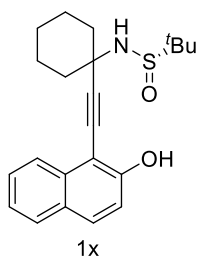

$^{13}\text{C NMR}$  (100 MHz,  $\text{CDCl}_3$ )

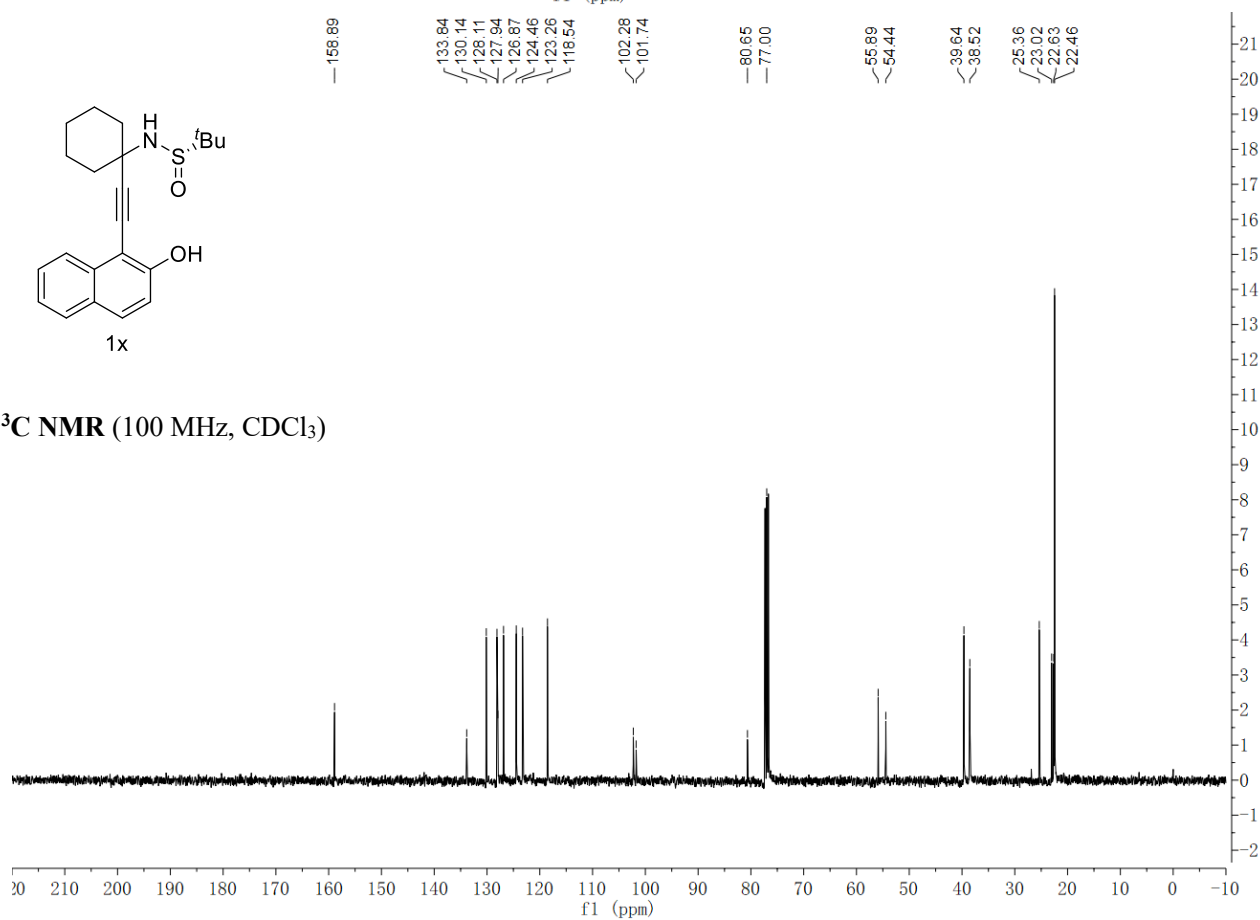



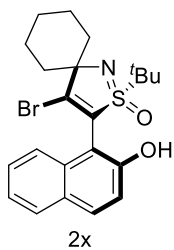

$^1\text{H NMR}$  (400 MHz,  $\text{CDCl}_3$ )

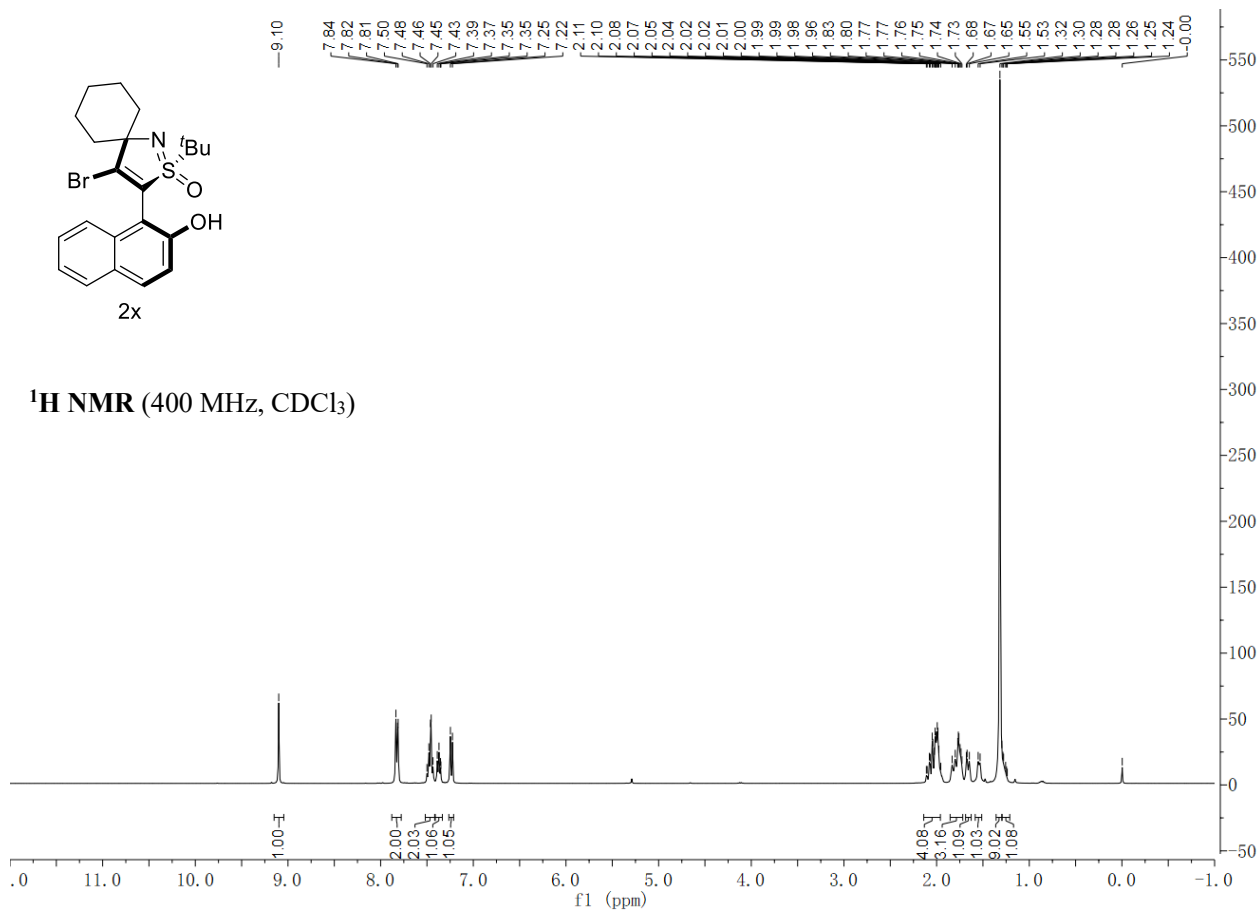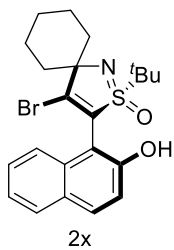

$^{13}\text{C NMR}$  (100 MHz,  $\text{CDCl}_3$ )

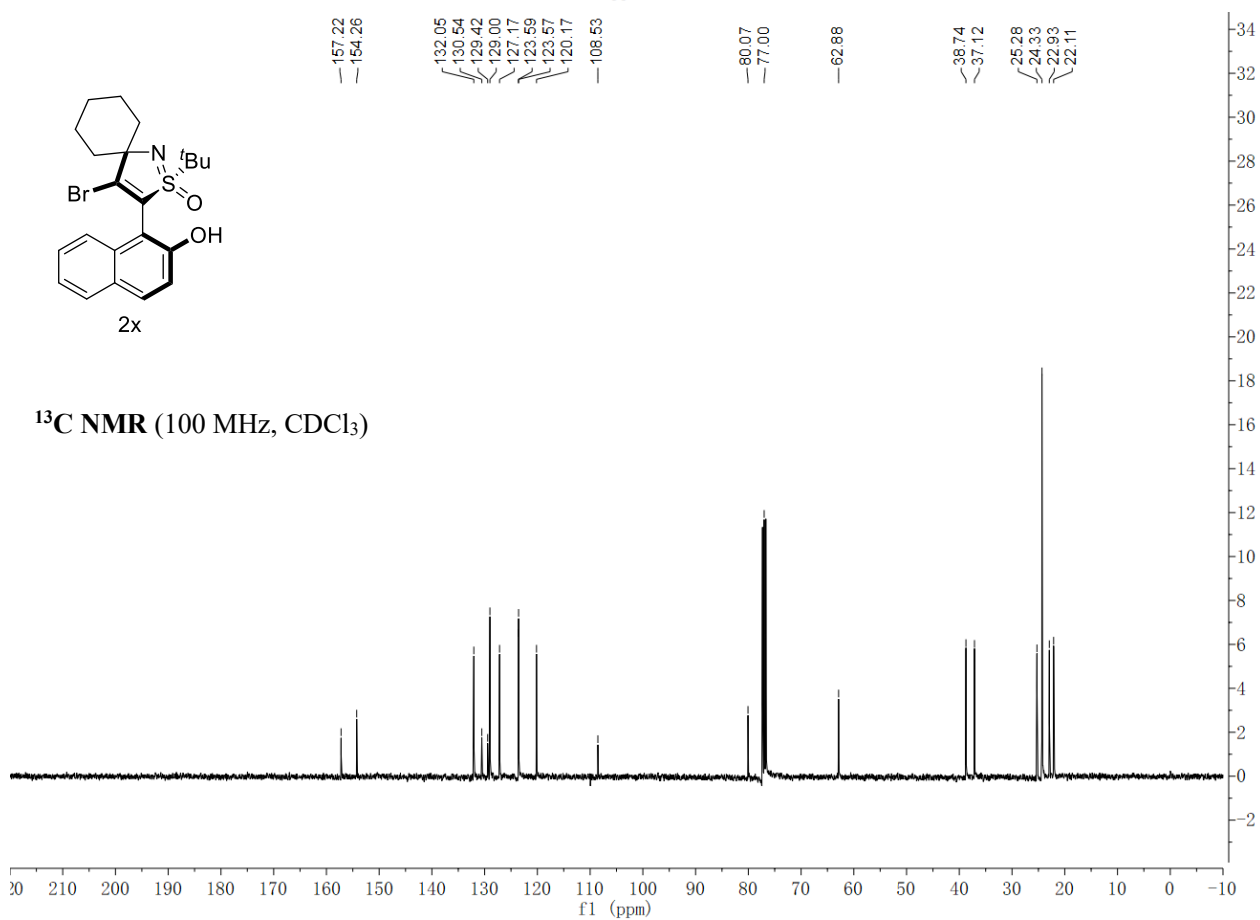

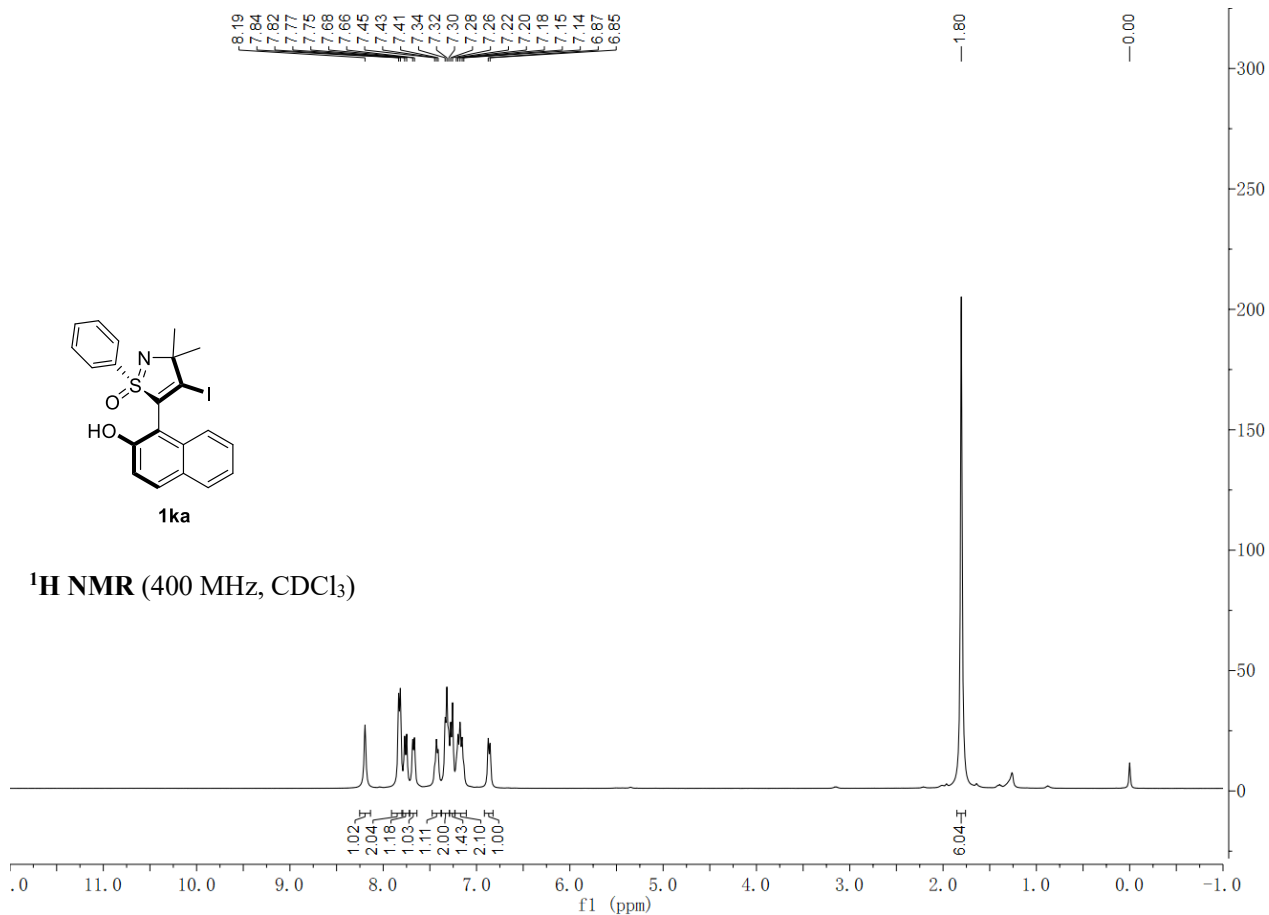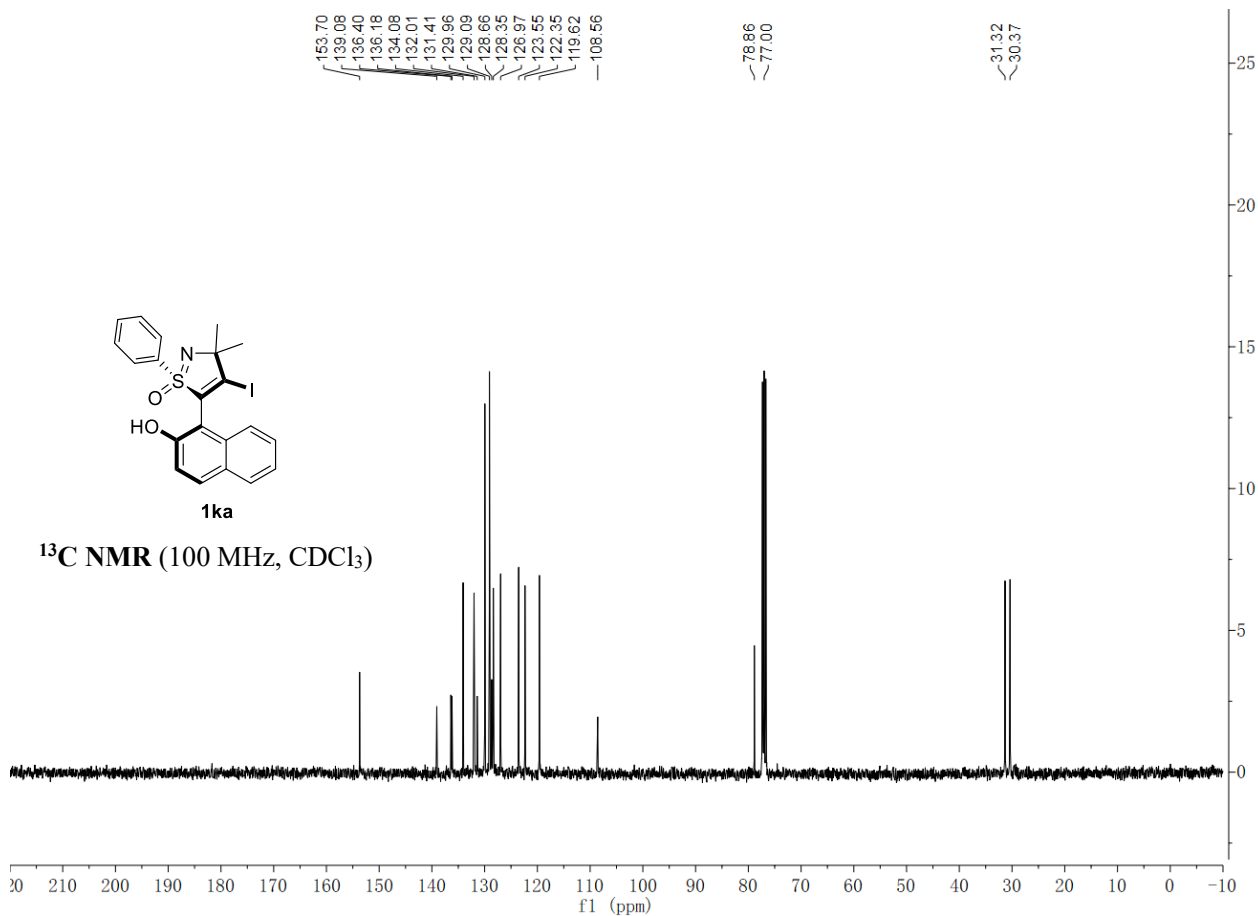

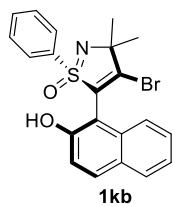

<sup>1</sup>H NMR (400 MHz, DMSO-*d*<sub>6</sub>)

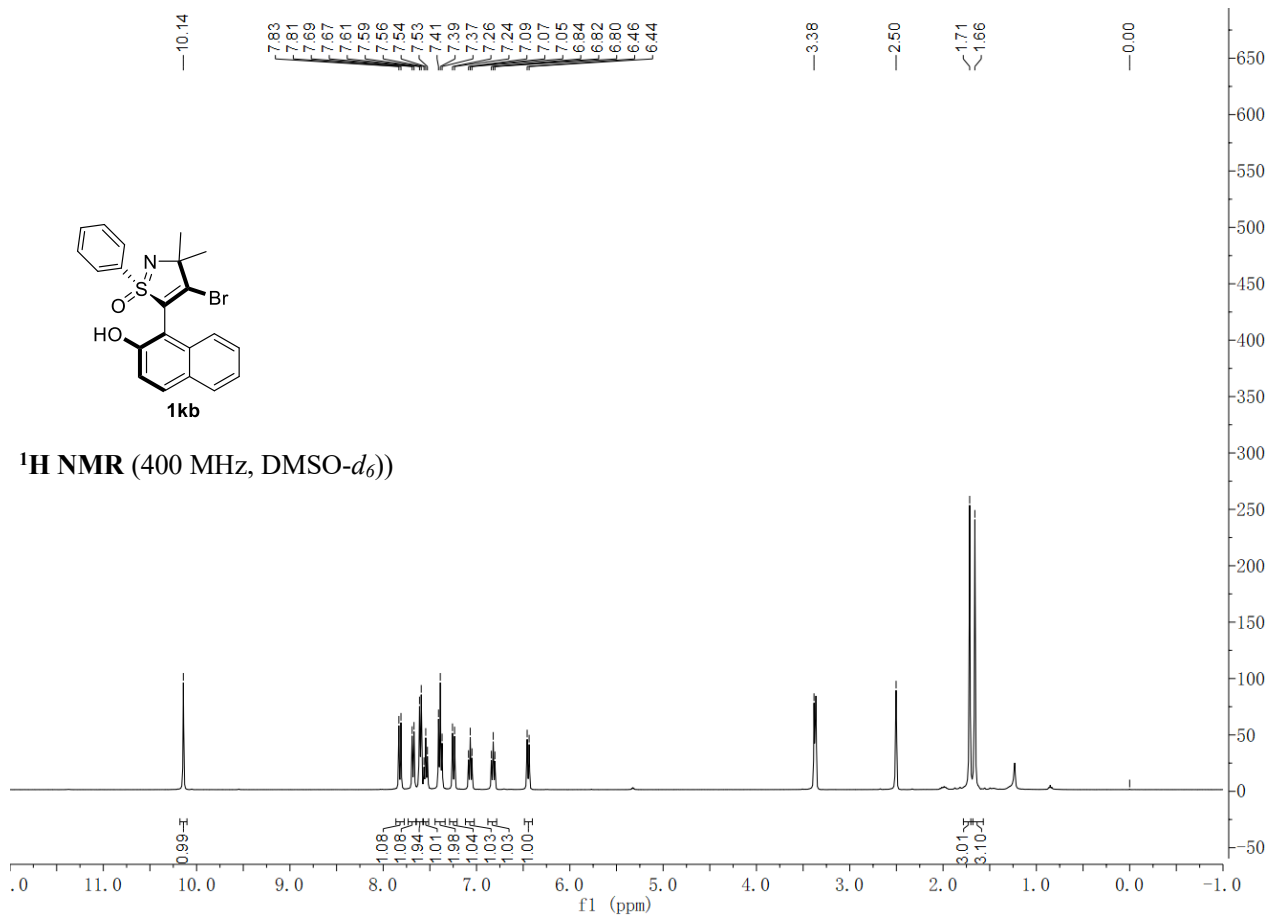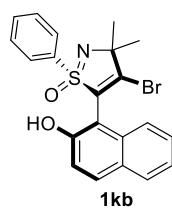

<sup>13</sup>C NMR (100 MHz, DMSO-*d*<sub>6</sub>)

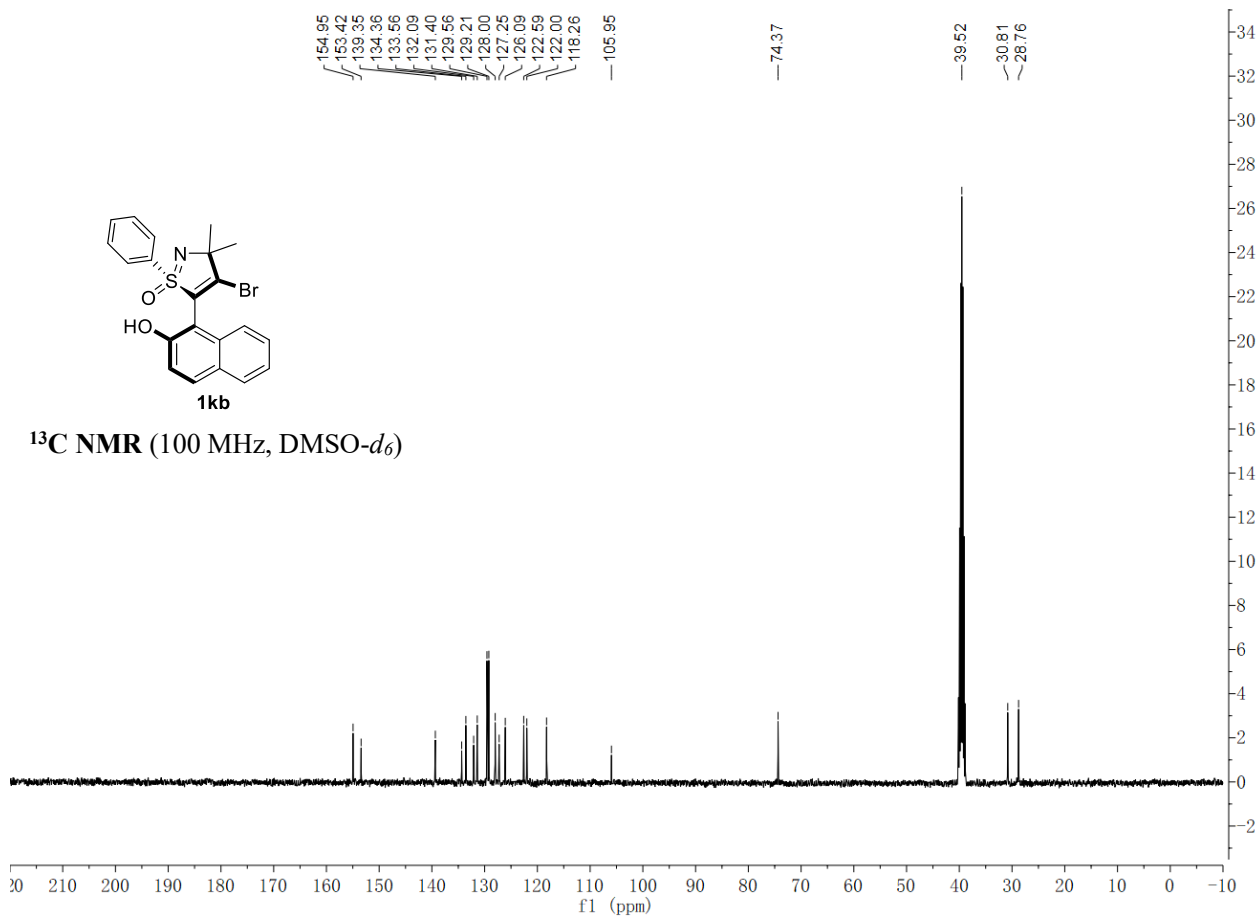

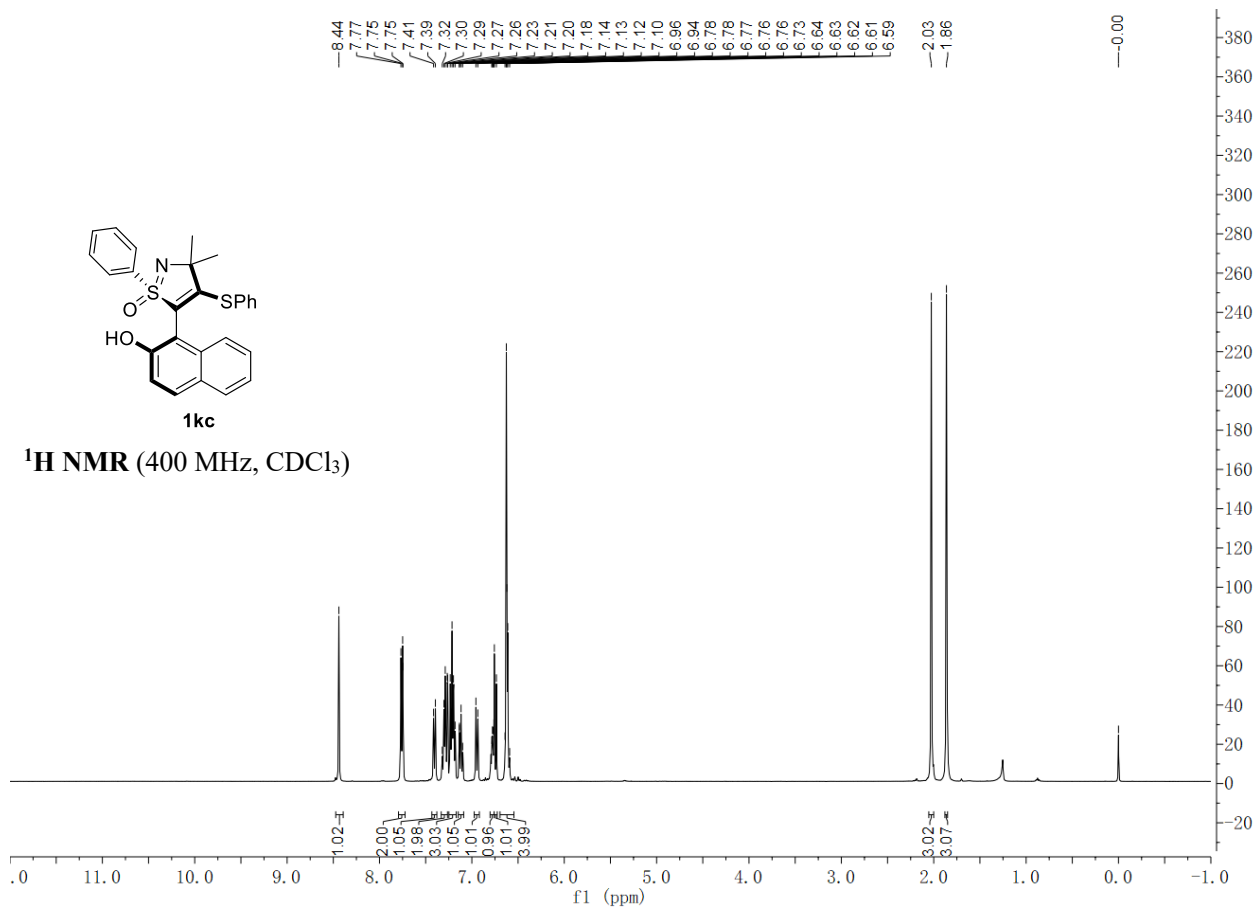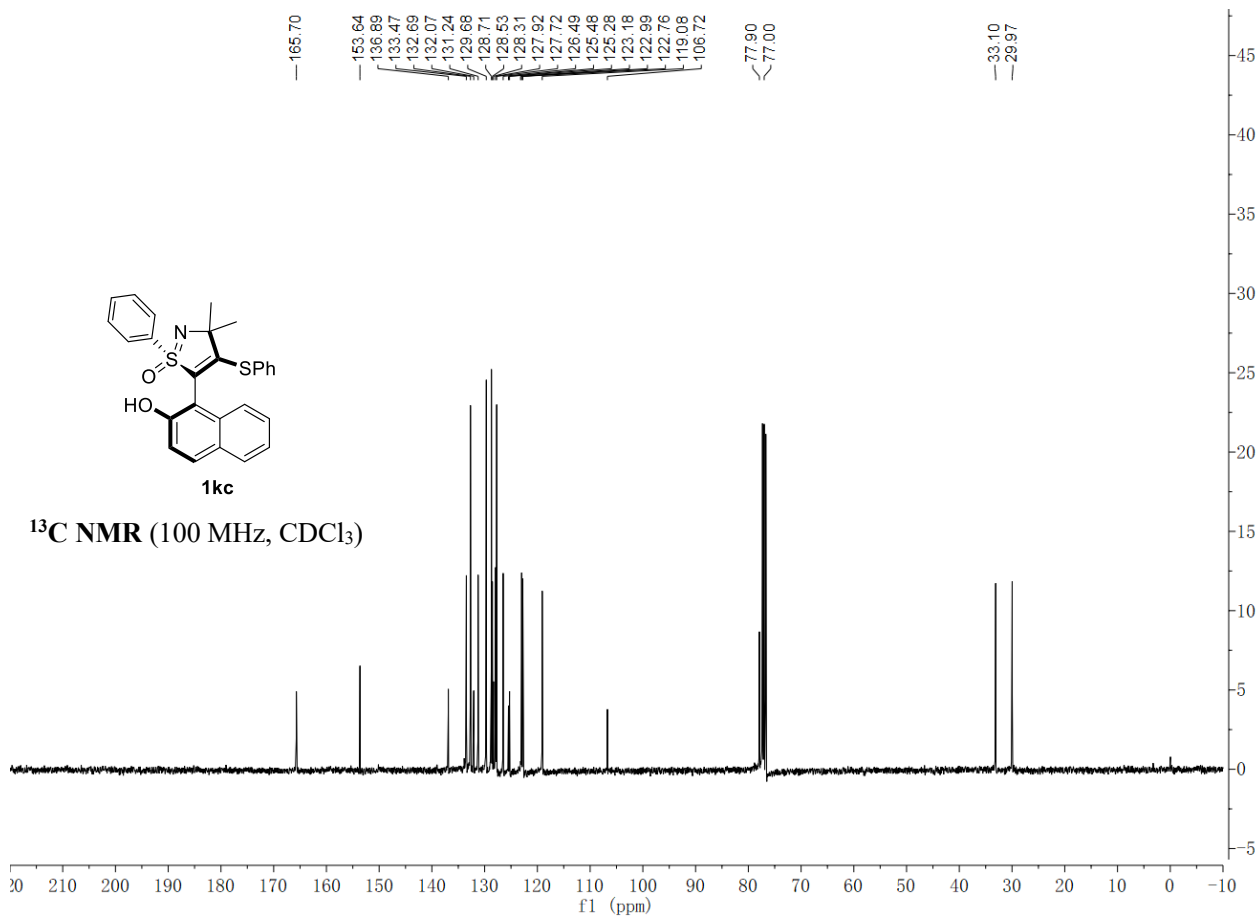

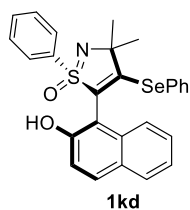

<sup>1</sup>H NMR (400 MHz, CDCl<sub>3</sub>)

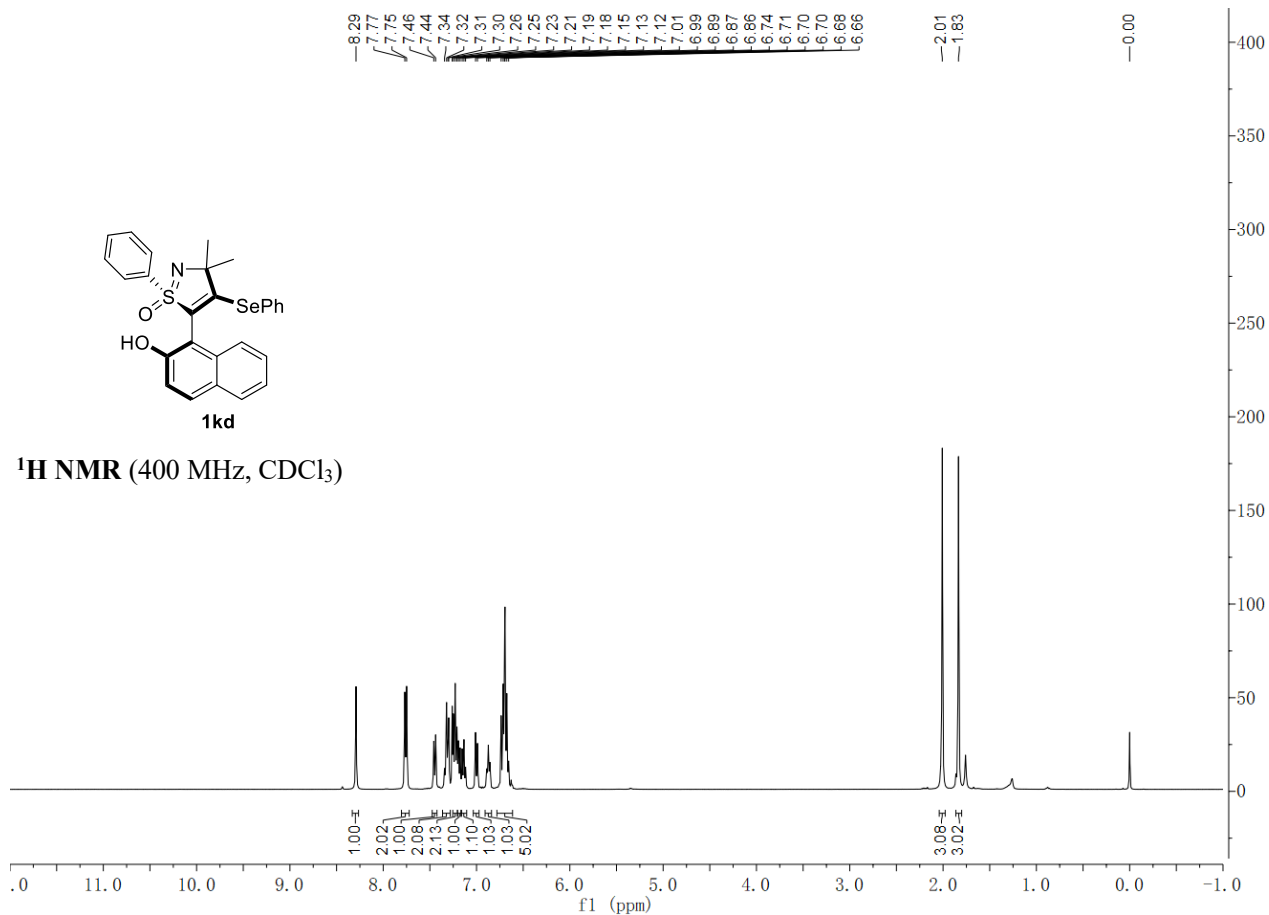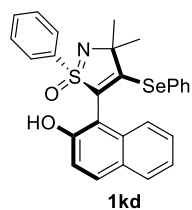

<sup>13</sup>C NMR (100 MHz, CDCl<sub>3</sub>)

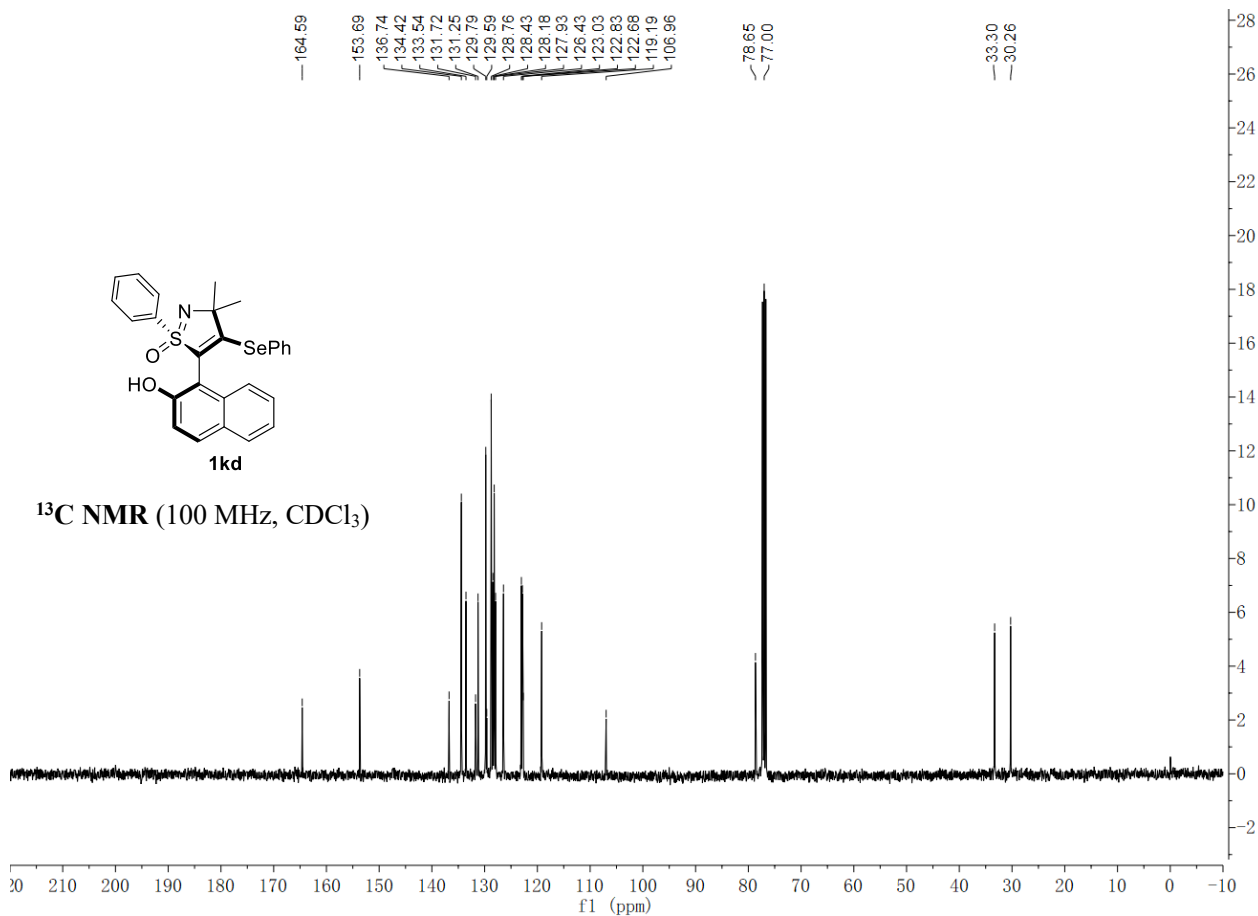

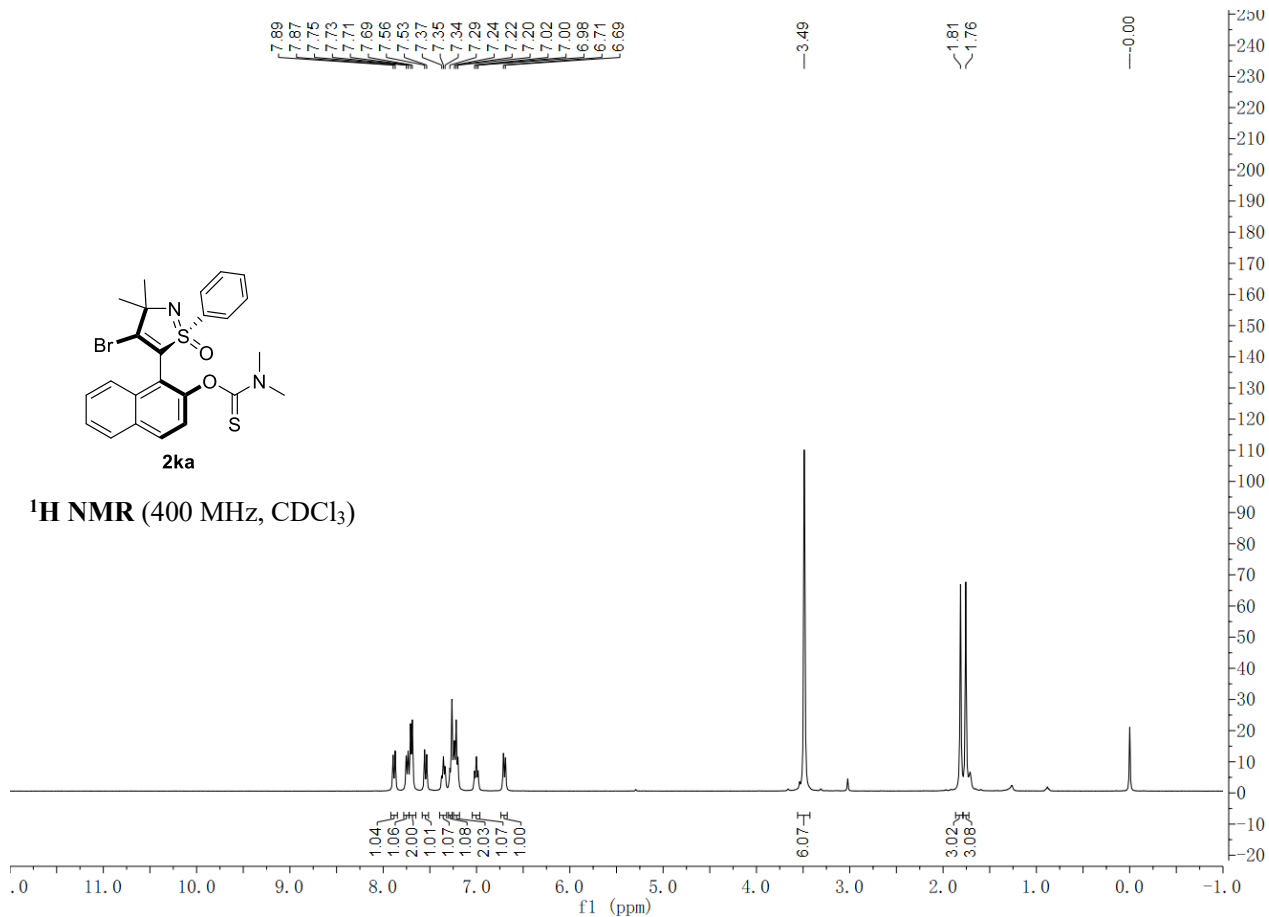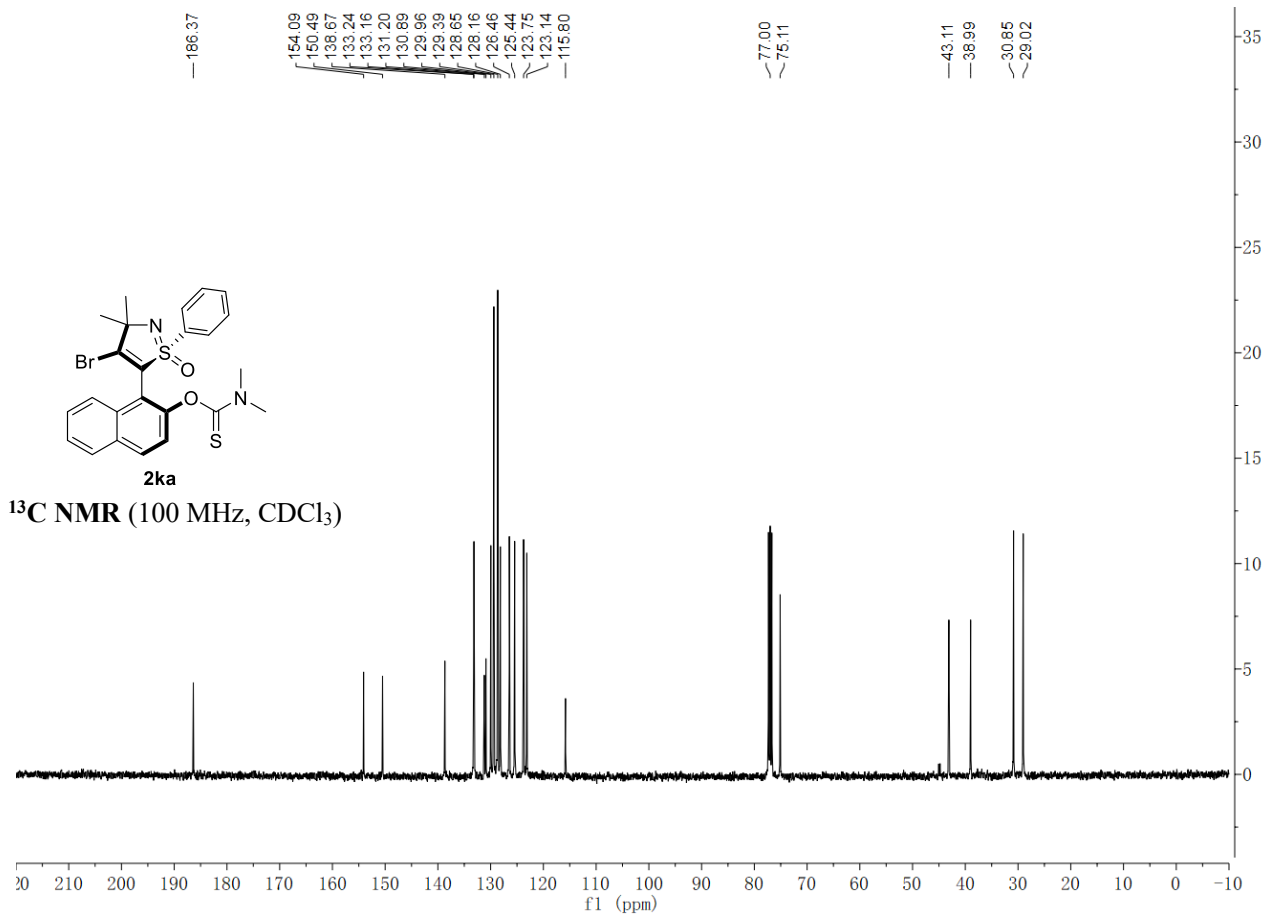

8.31  
8.29  
8.28  
8.26  
8.14  
8.12  
8.11  
8.09  
7.85  
7.82  
7.72  
7.70  
7.68  
7.66  
7.64  
7.62  
7.58  
7.56  
7.53  
7.51  
7.49  
7.47  
7.45  
7.44  
7.42  
7.40  
7.26  
7.25  
7.23  
7.18  
7.16  
7.14  
6.88  
6.86  
6.84  
6.54  
6.52

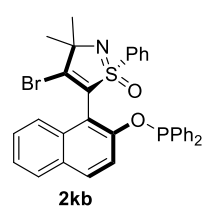

<sup>1</sup>H NMR (400 MHz, CDCl<sub>3</sub>)

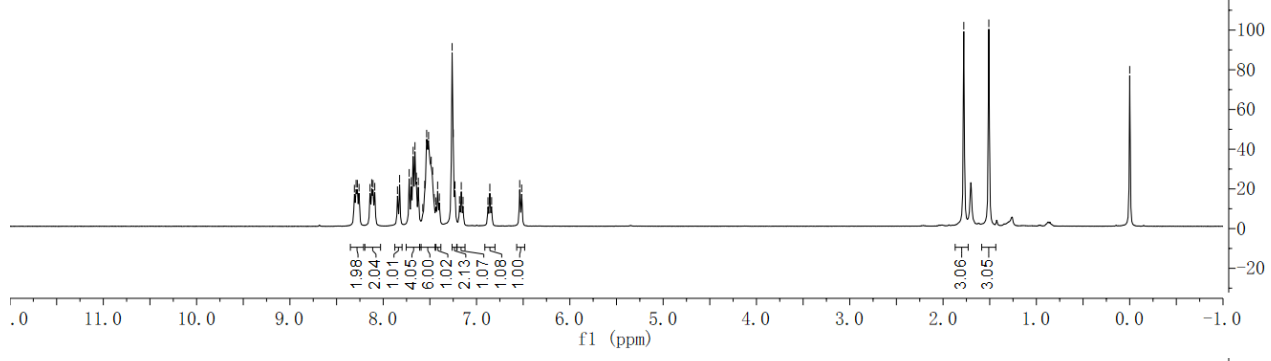

154.27  
149.07  
149.00  
138.90  
133.40  
132.57  
132.47  
131.87  
131.76  
131.67  
131.15  
130.41  
129.82  
129.70  
129.53  
128.85  
128.79  
128.66  
128.59  
128.45  
127.96  
126.51  
124.72  
123.02  
119.01  
112.39  
77.00  
75.30

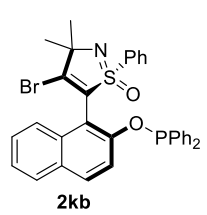

<sup>13</sup>C NMR (100 MHz, CDCl<sub>3</sub>)

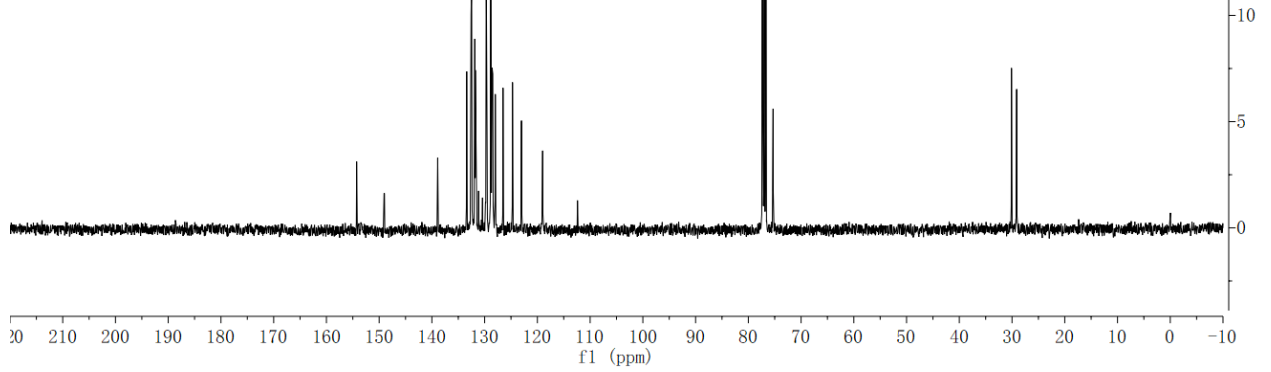

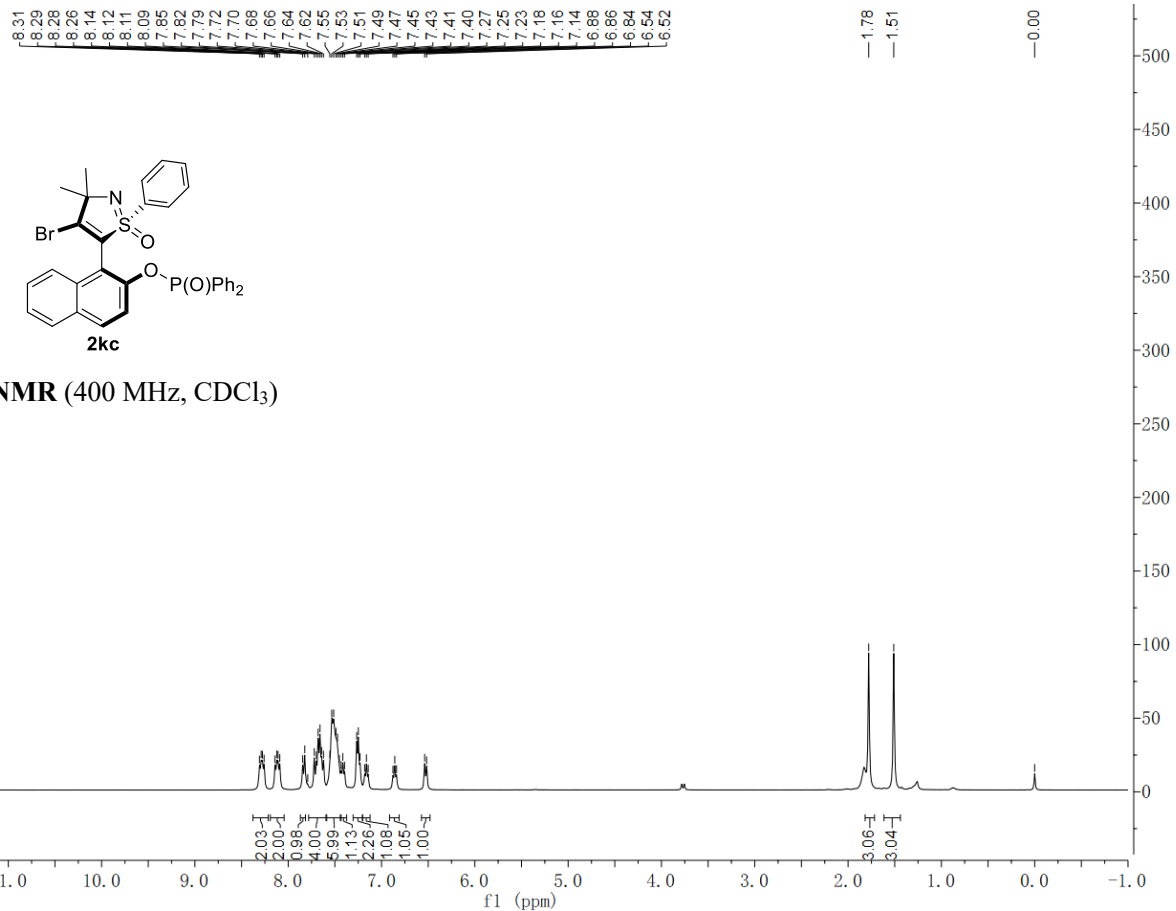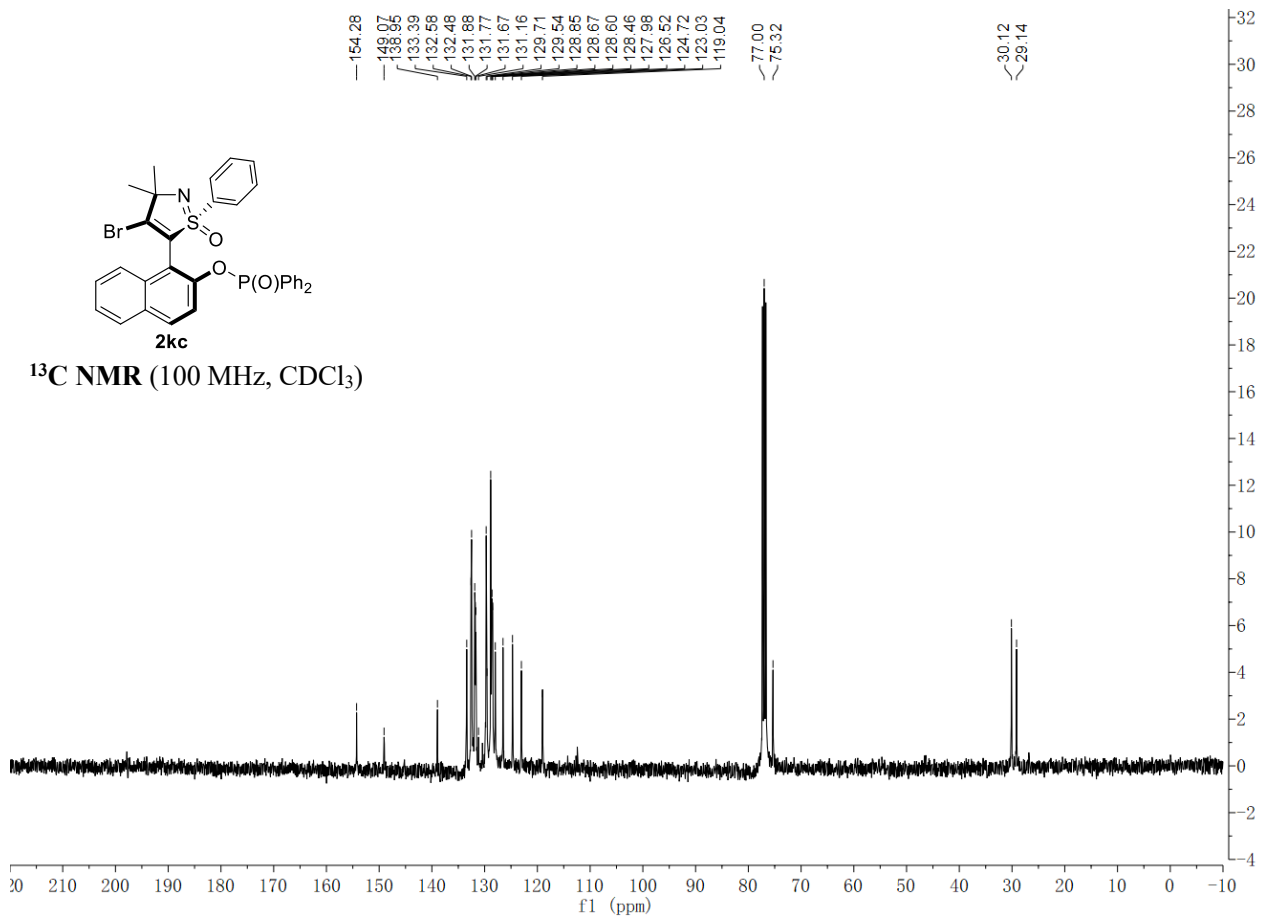



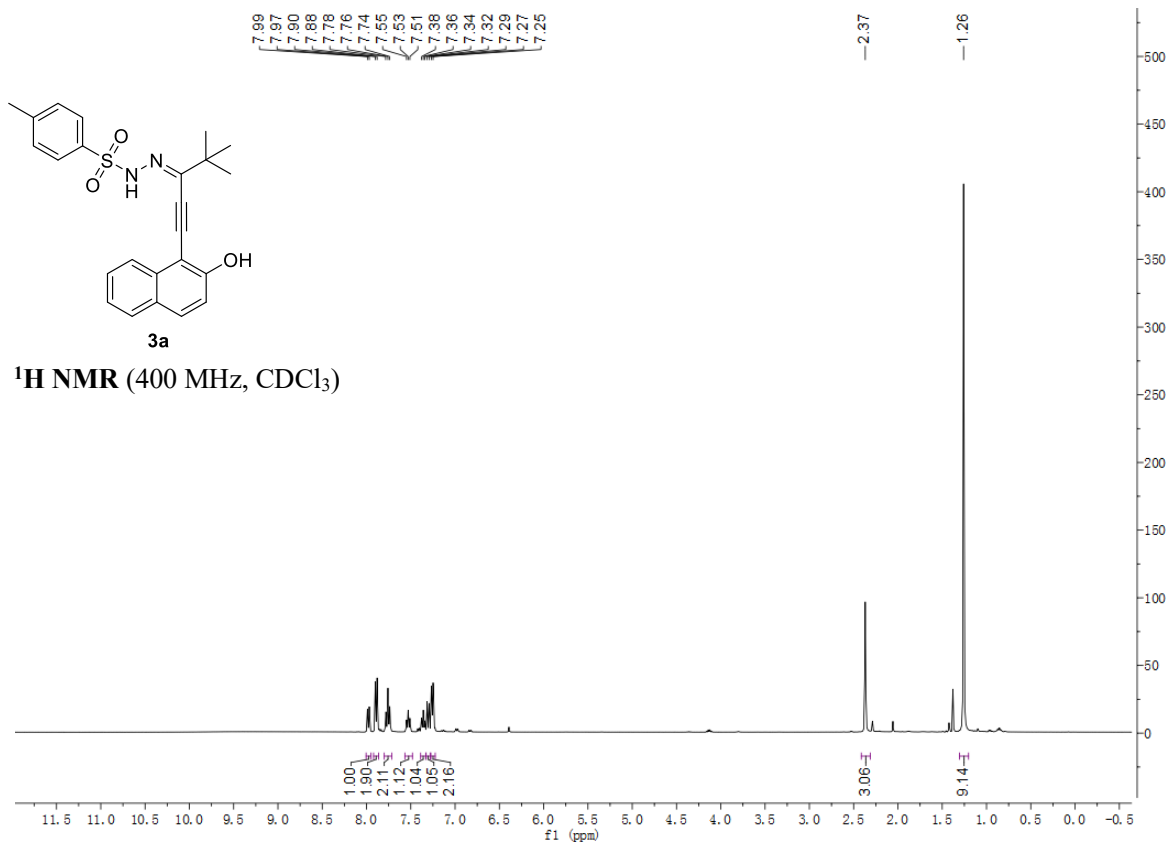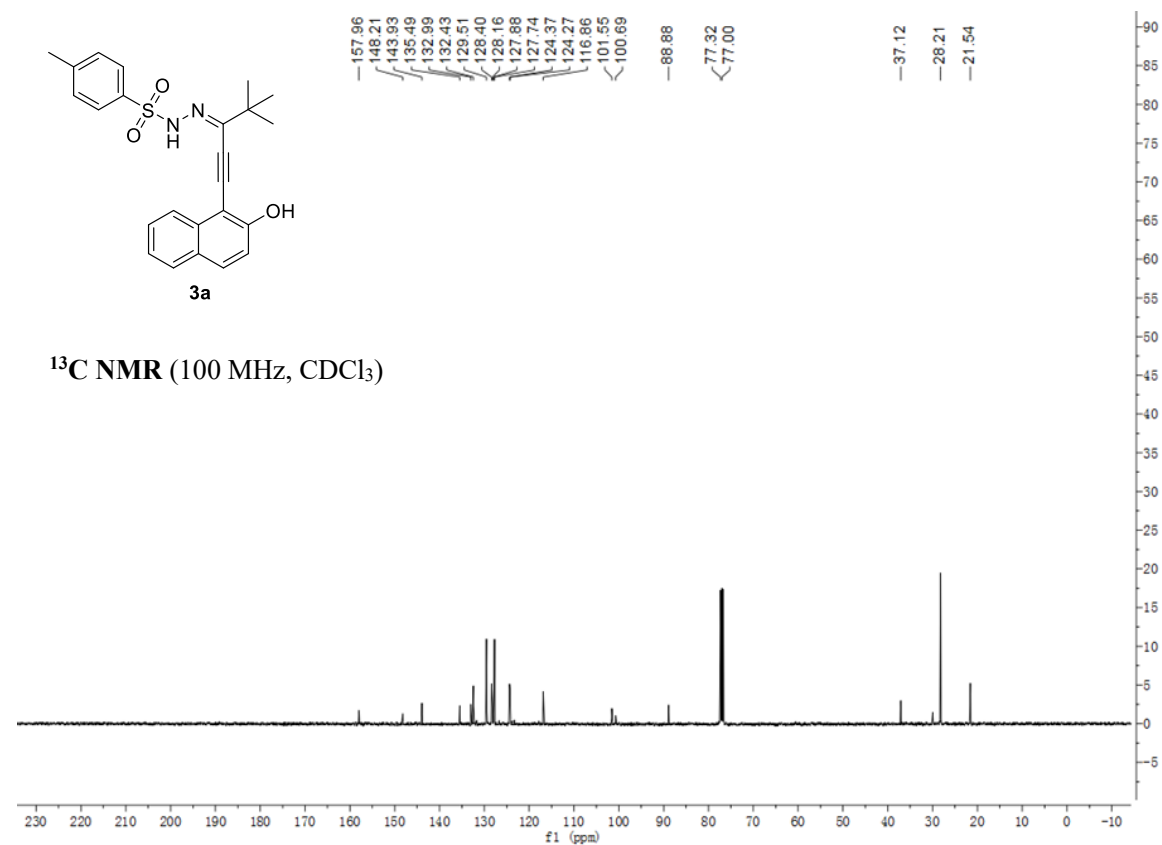

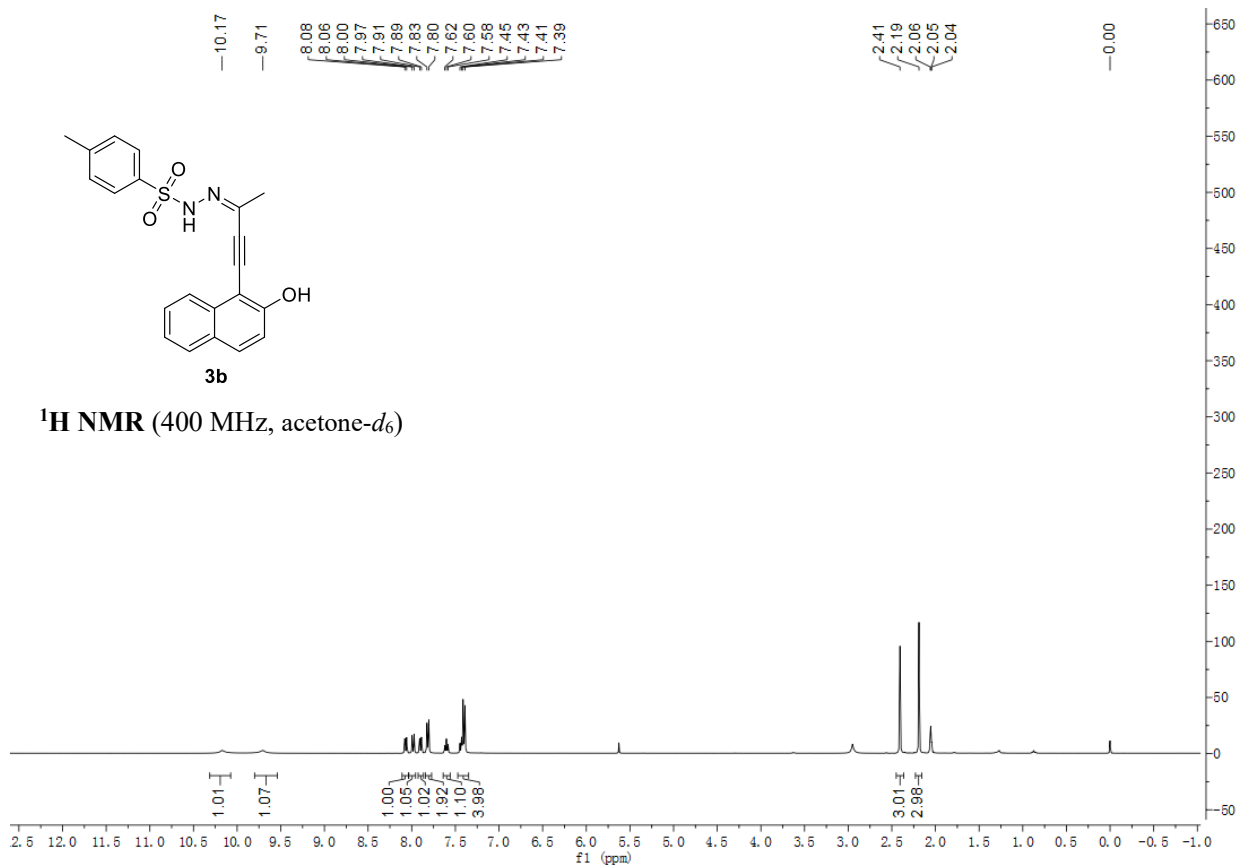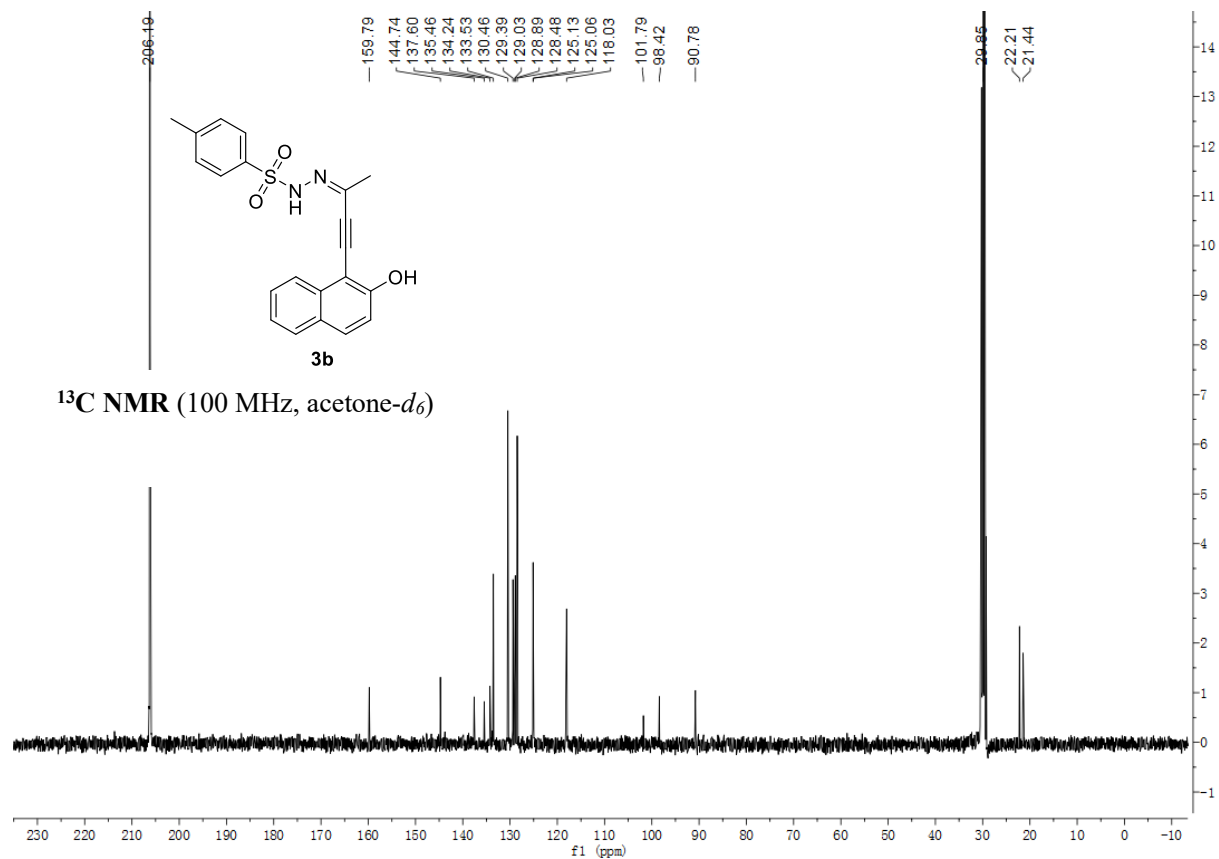

**3c**  
 $^1\text{H NMR}$  (400 MHz,  $\text{CDCl}_3$ )

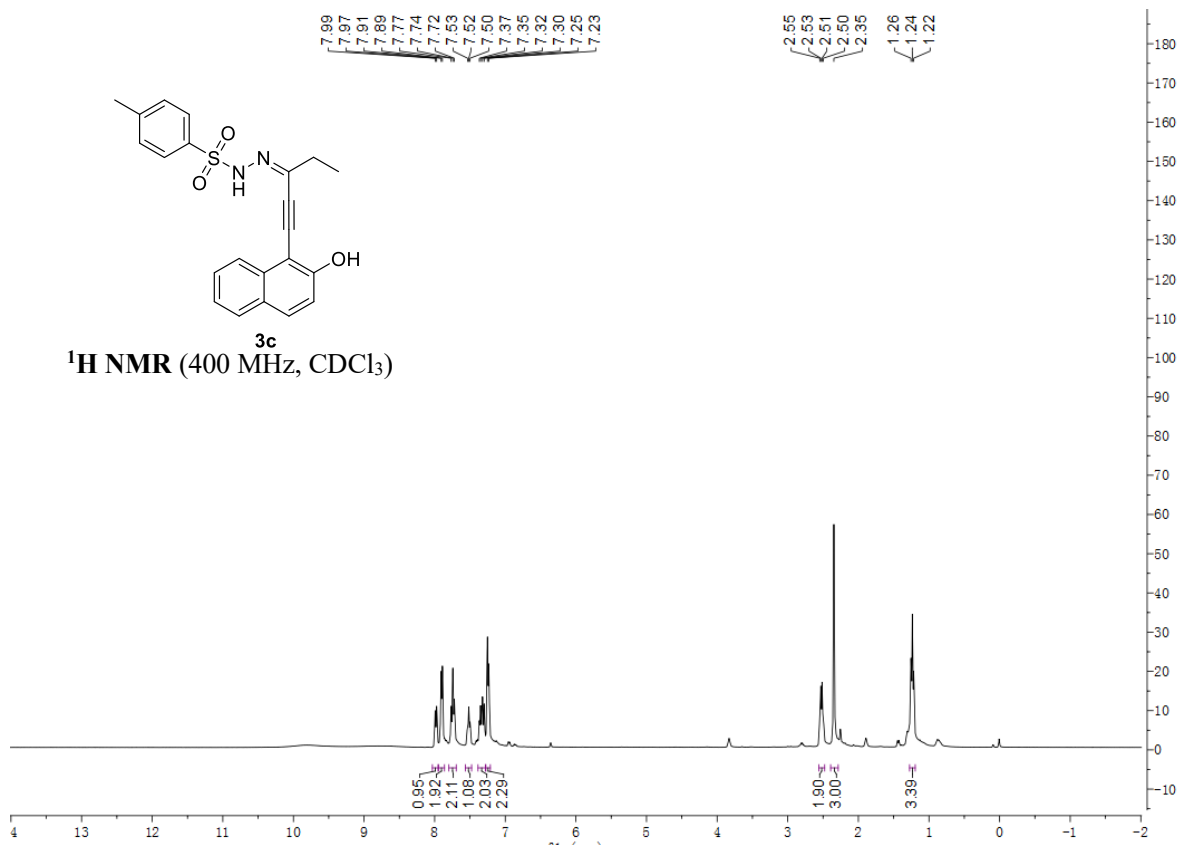

**3c**  
 $^{13}\text{C NMR}$  (100 MHz,  $\text{CDCl}_3$ )

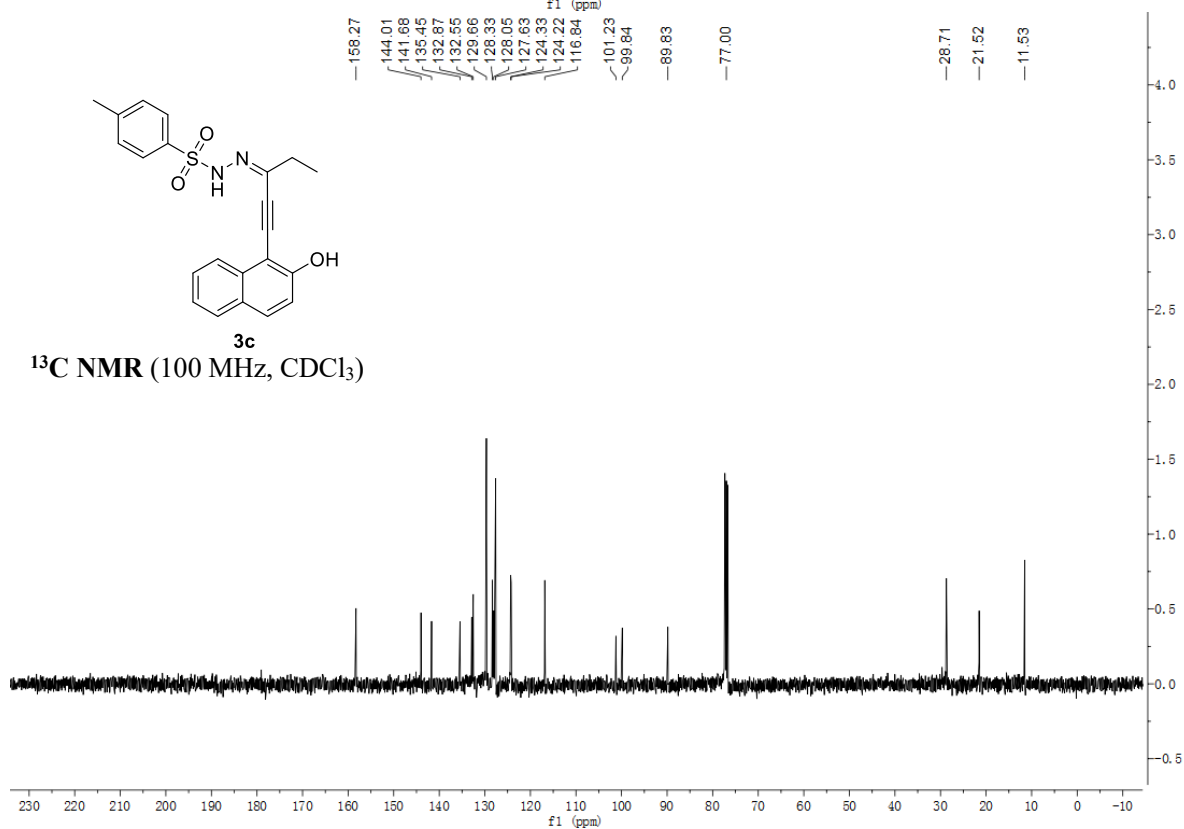

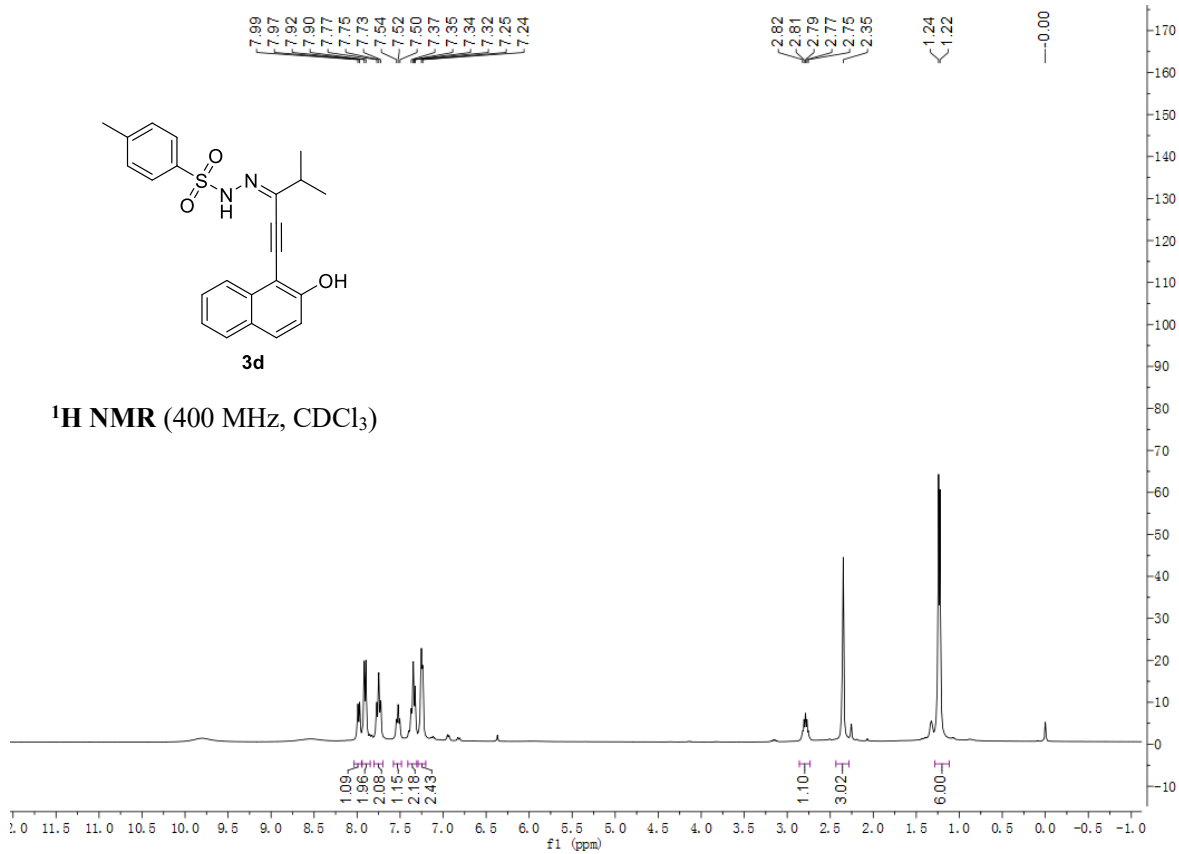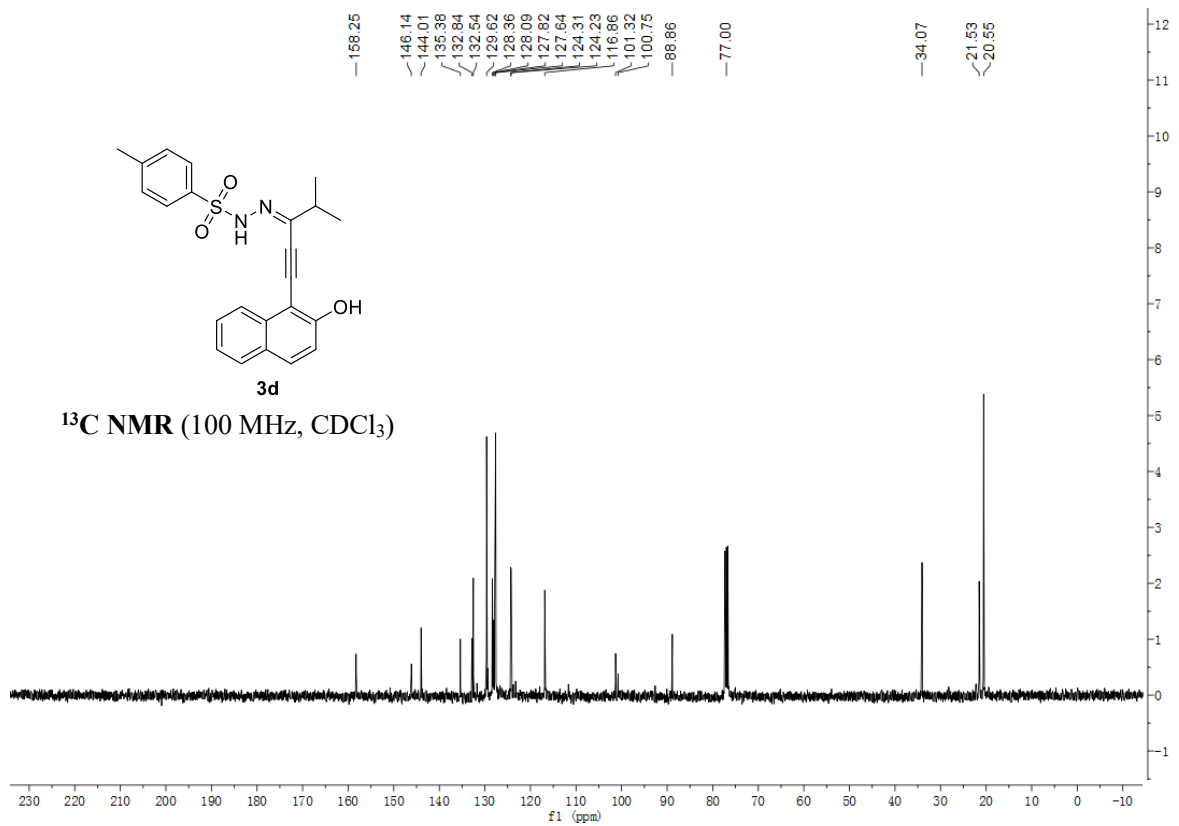

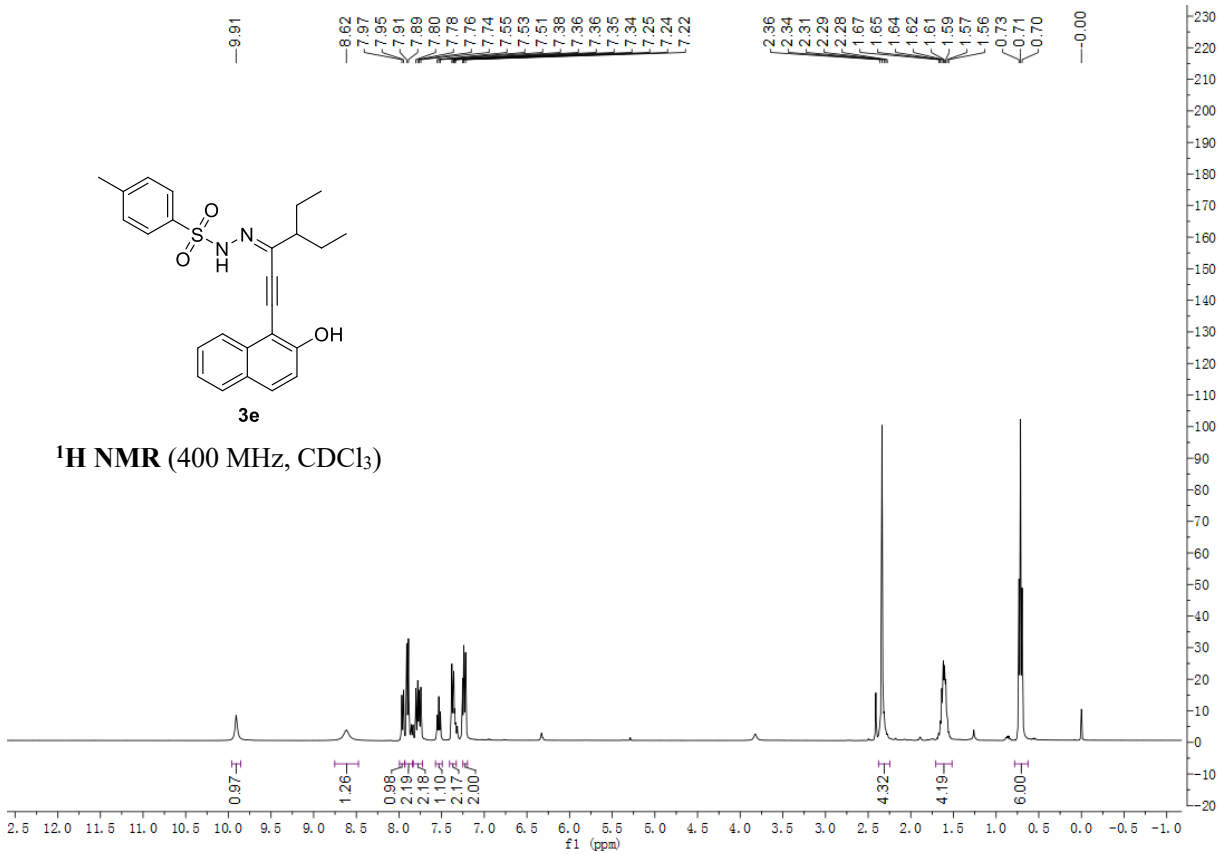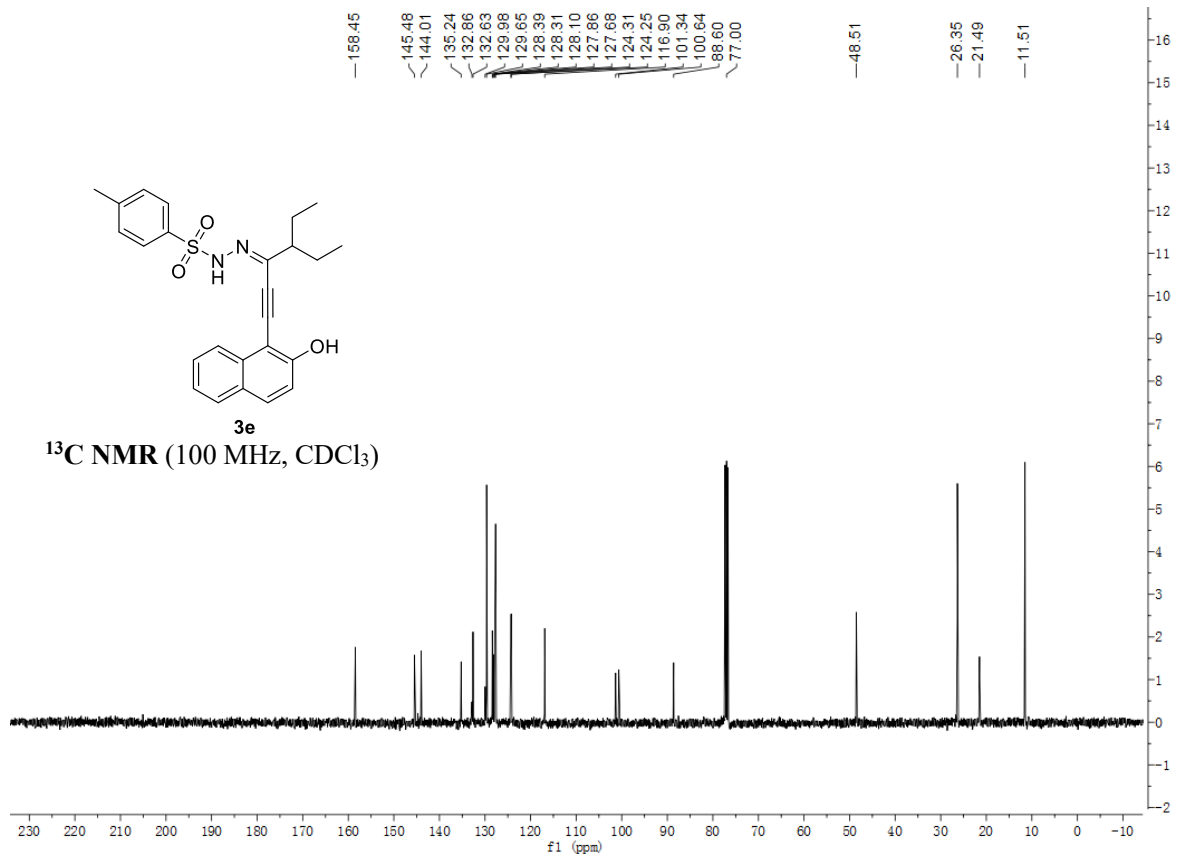

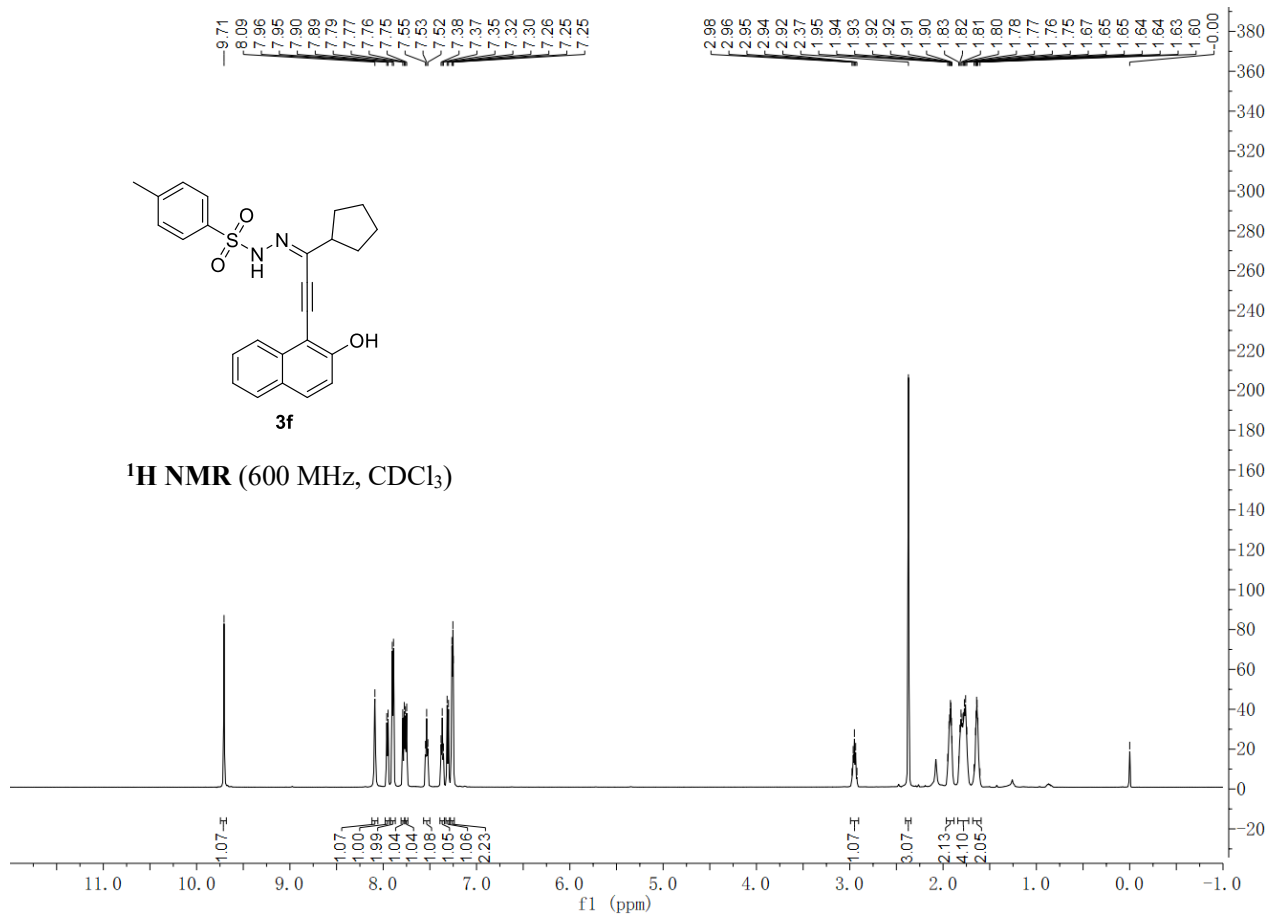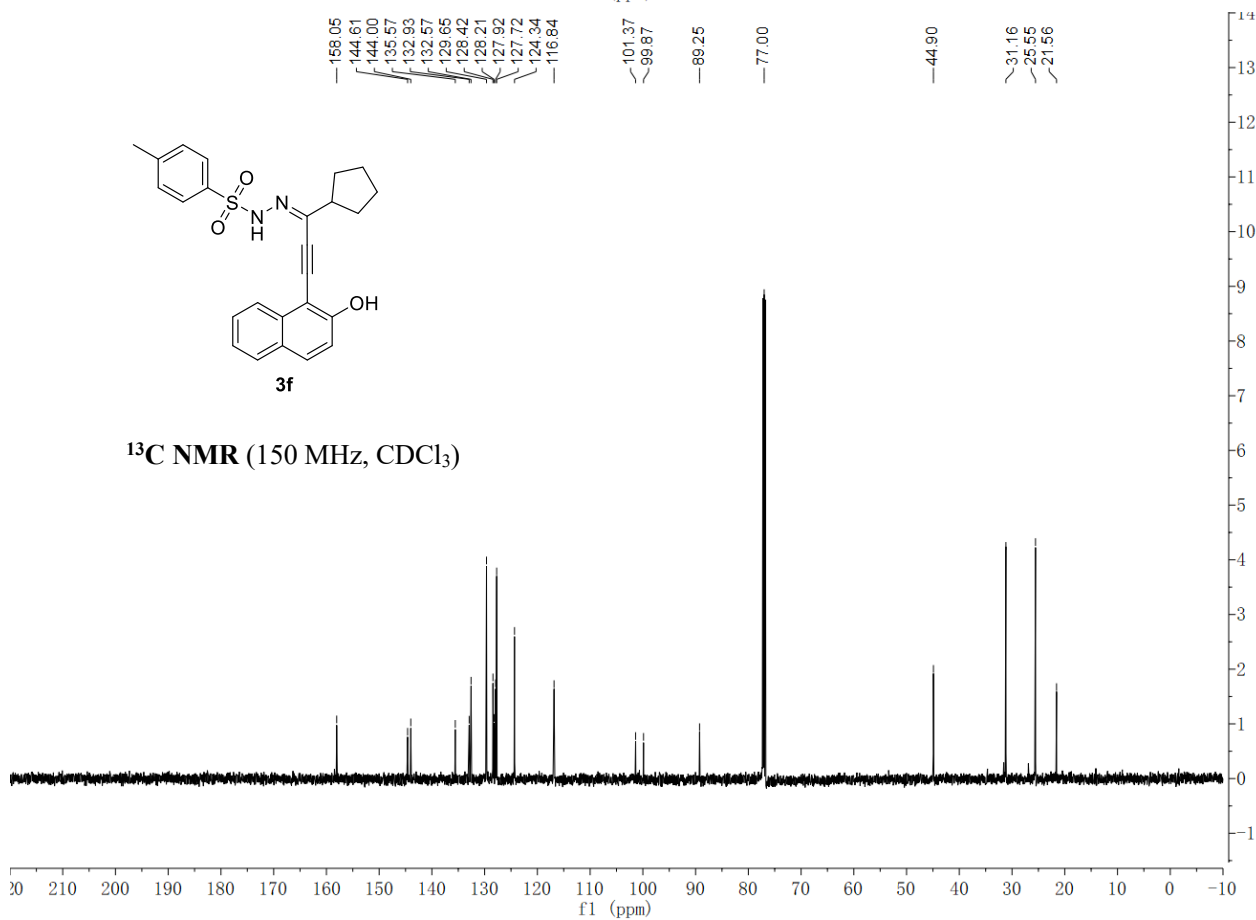

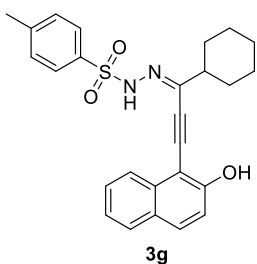

<sup>1</sup>H NMR (400 MHz, CDCl<sub>3</sub>)

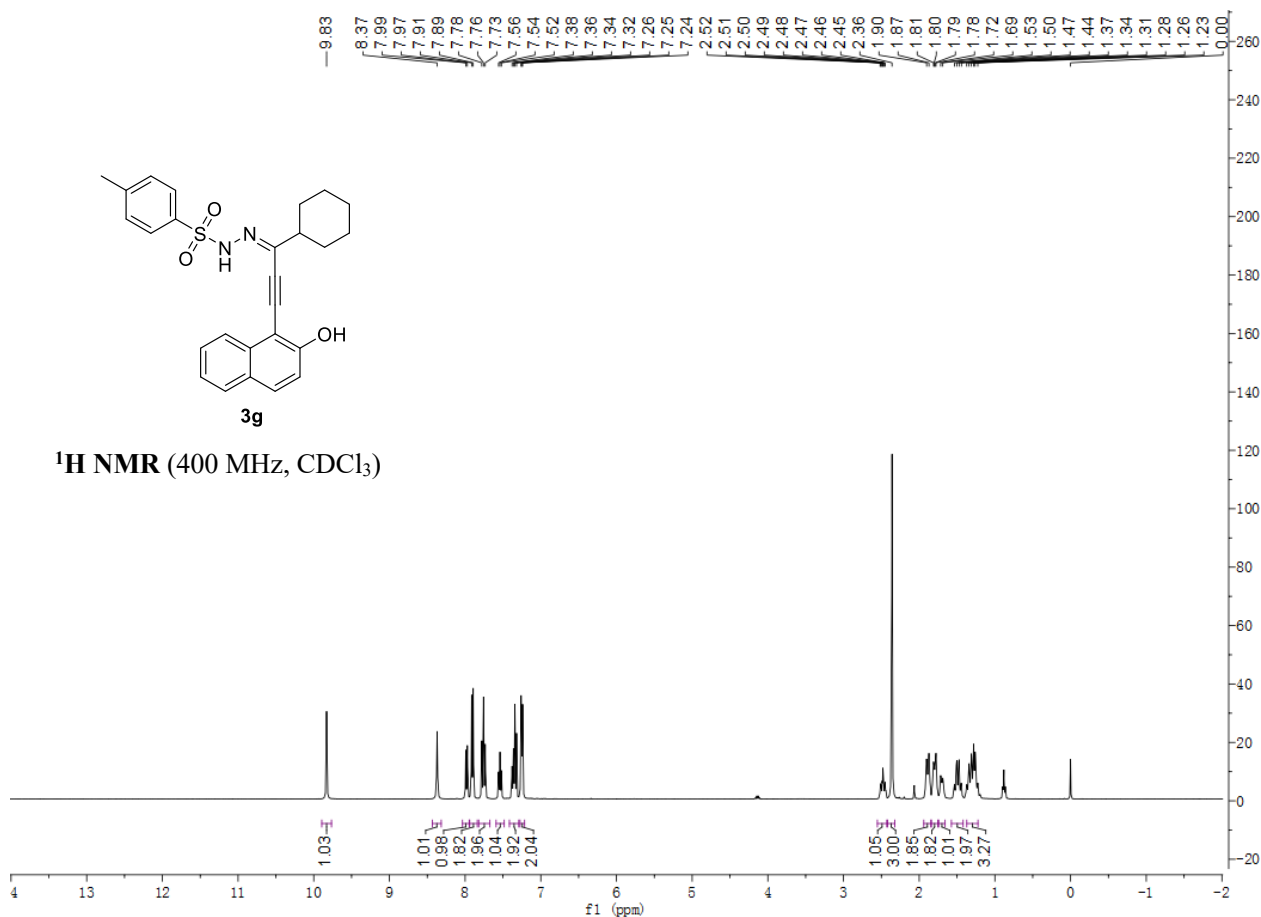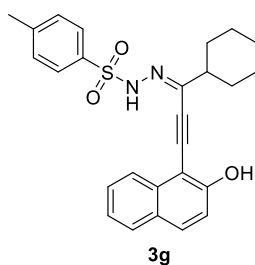

<sup>13</sup>C NMR (100 MHz, CDCl<sub>3</sub>)

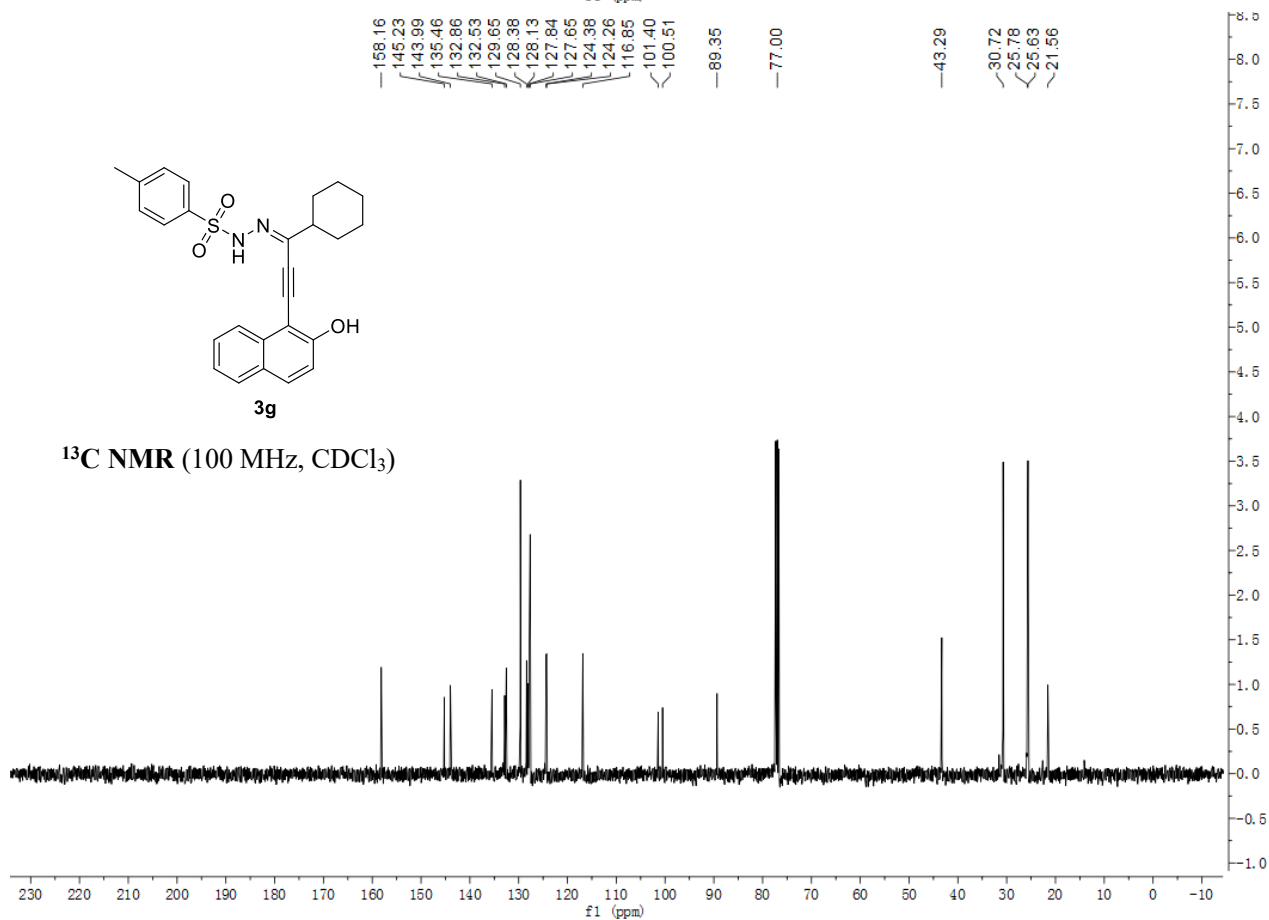

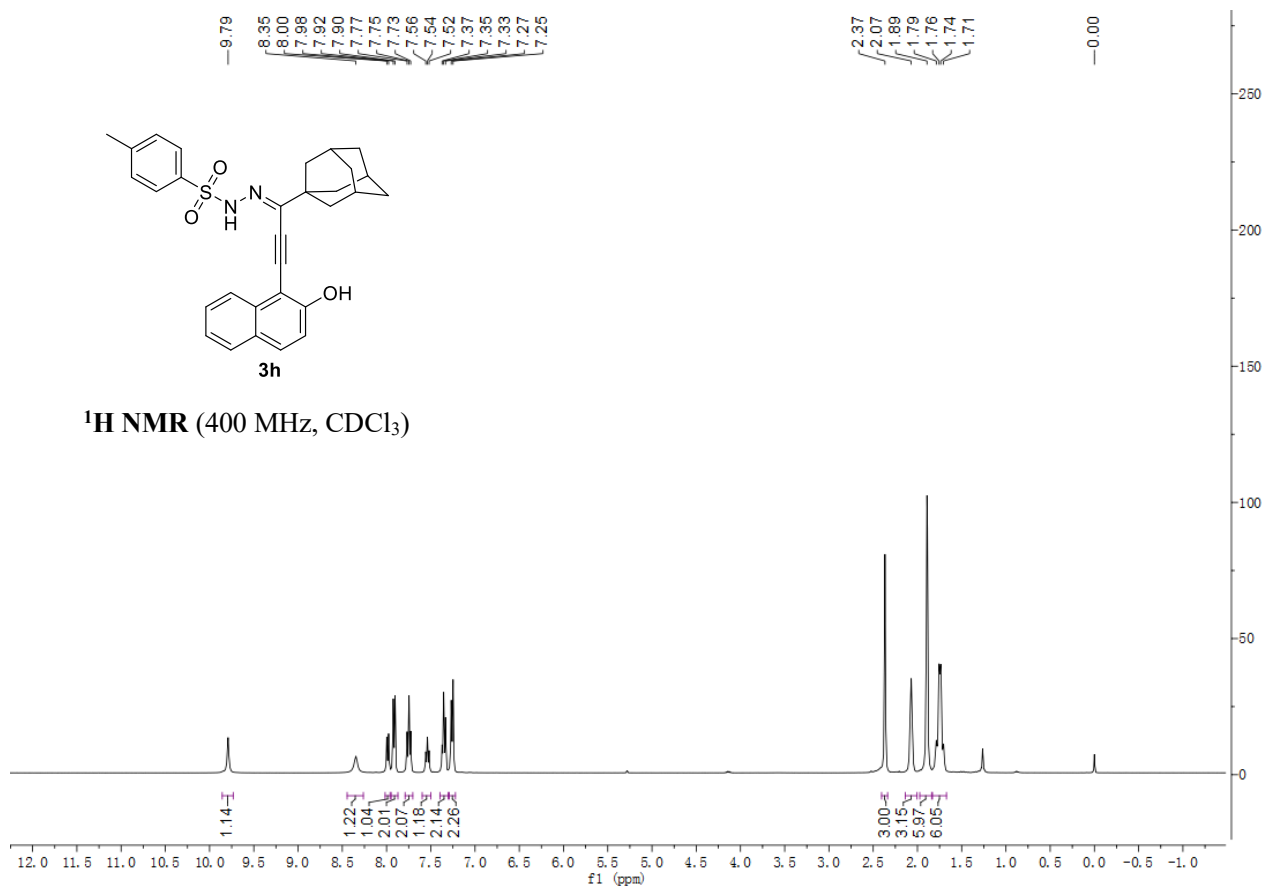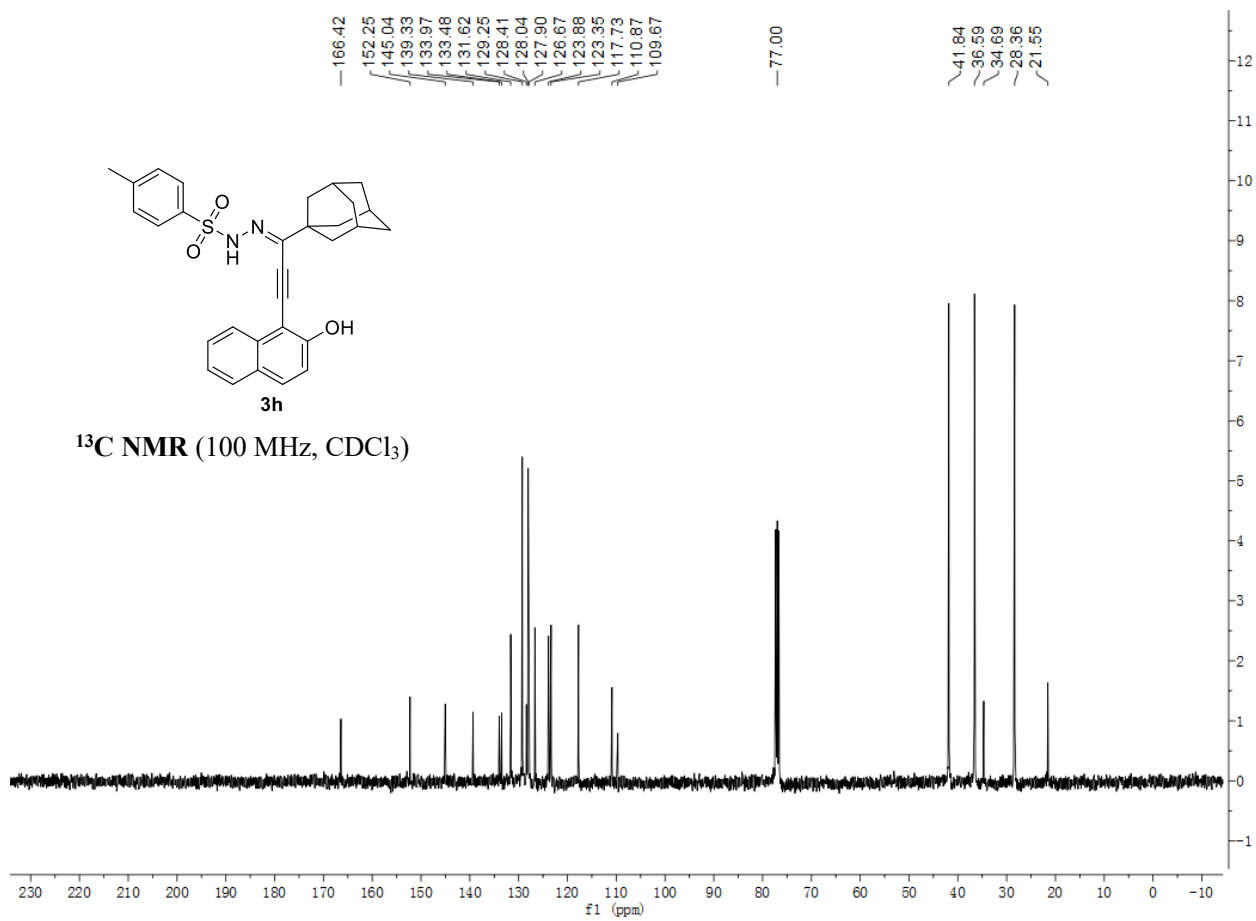



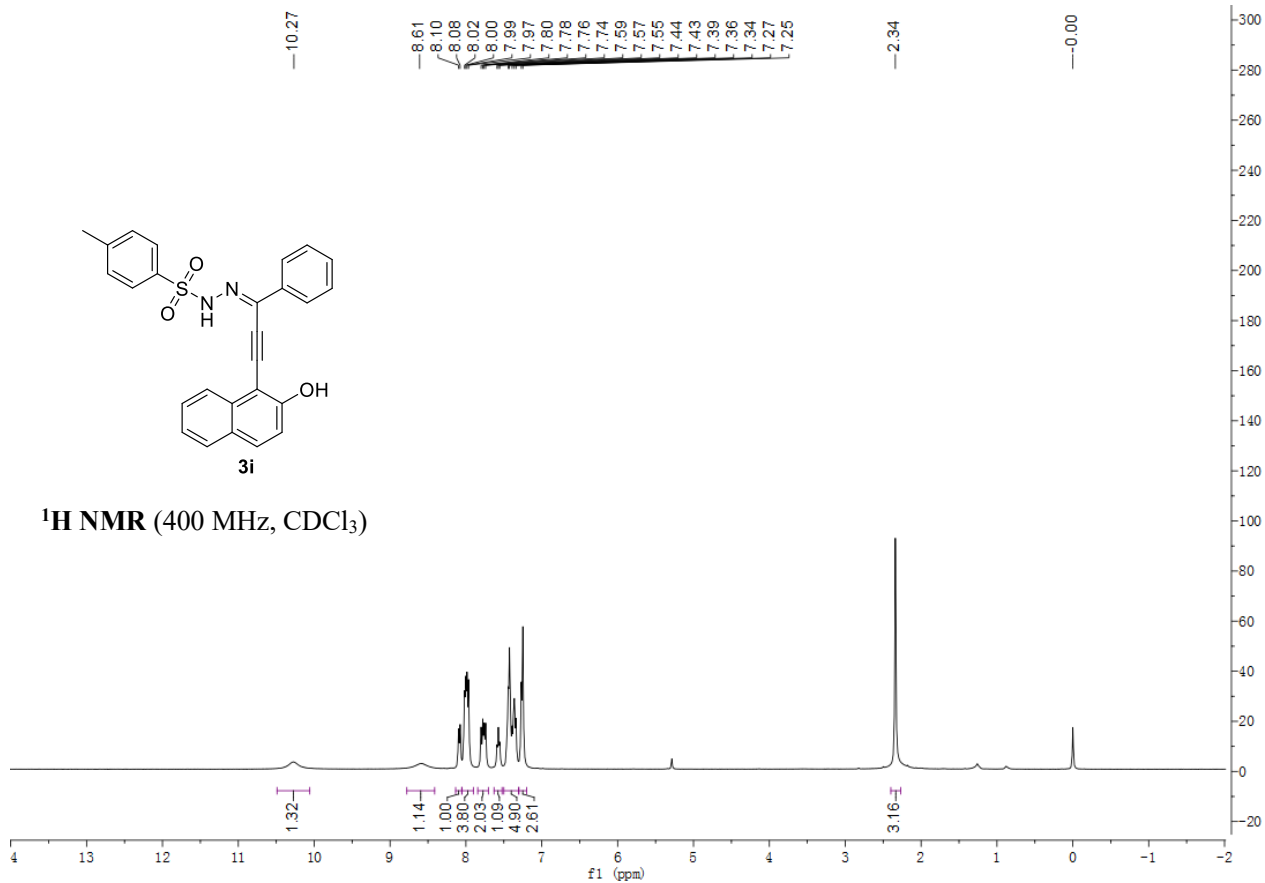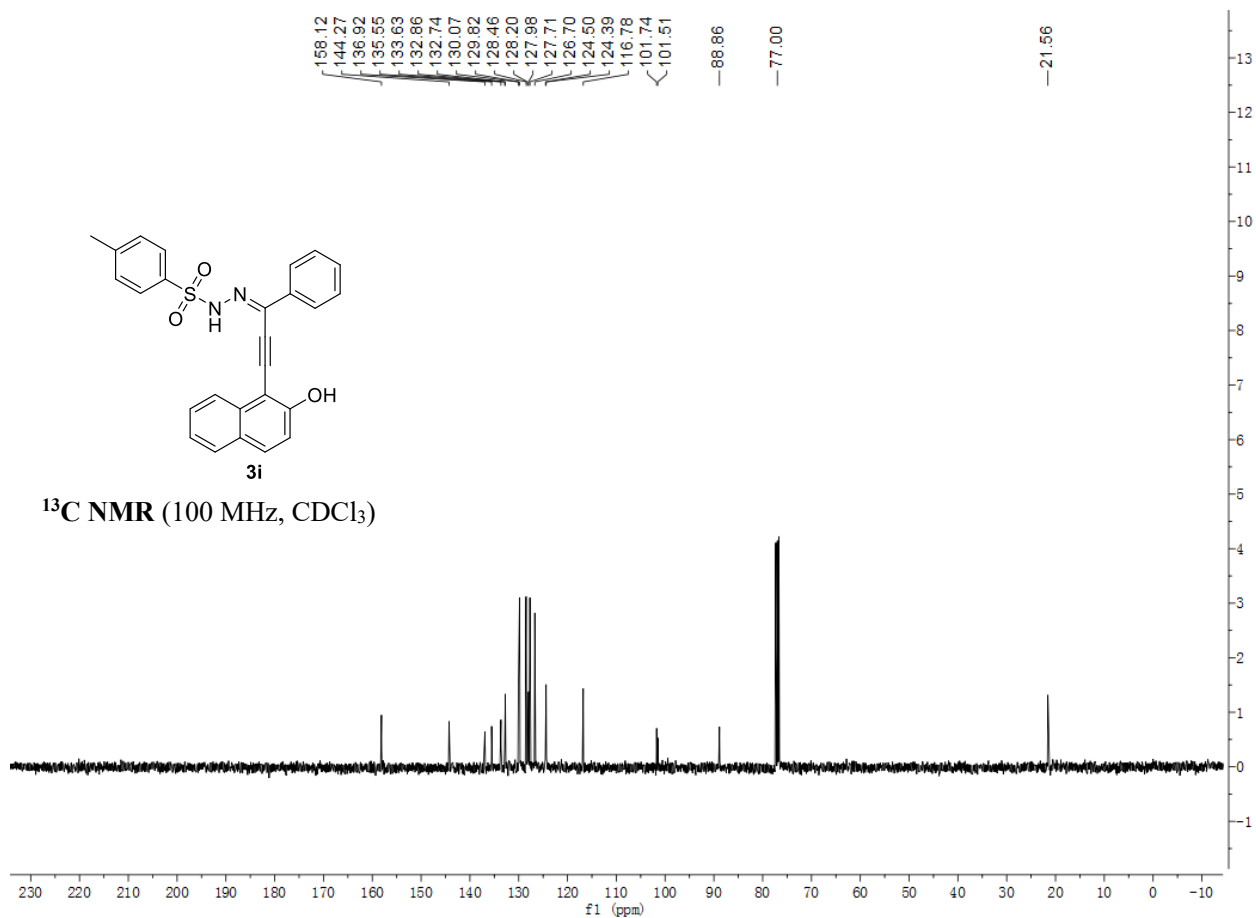

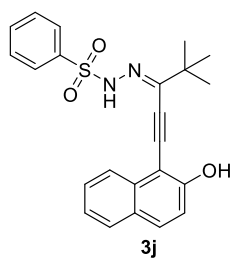

<sup>1</sup>H NMR (400 MHz, CDCl<sub>3</sub>)

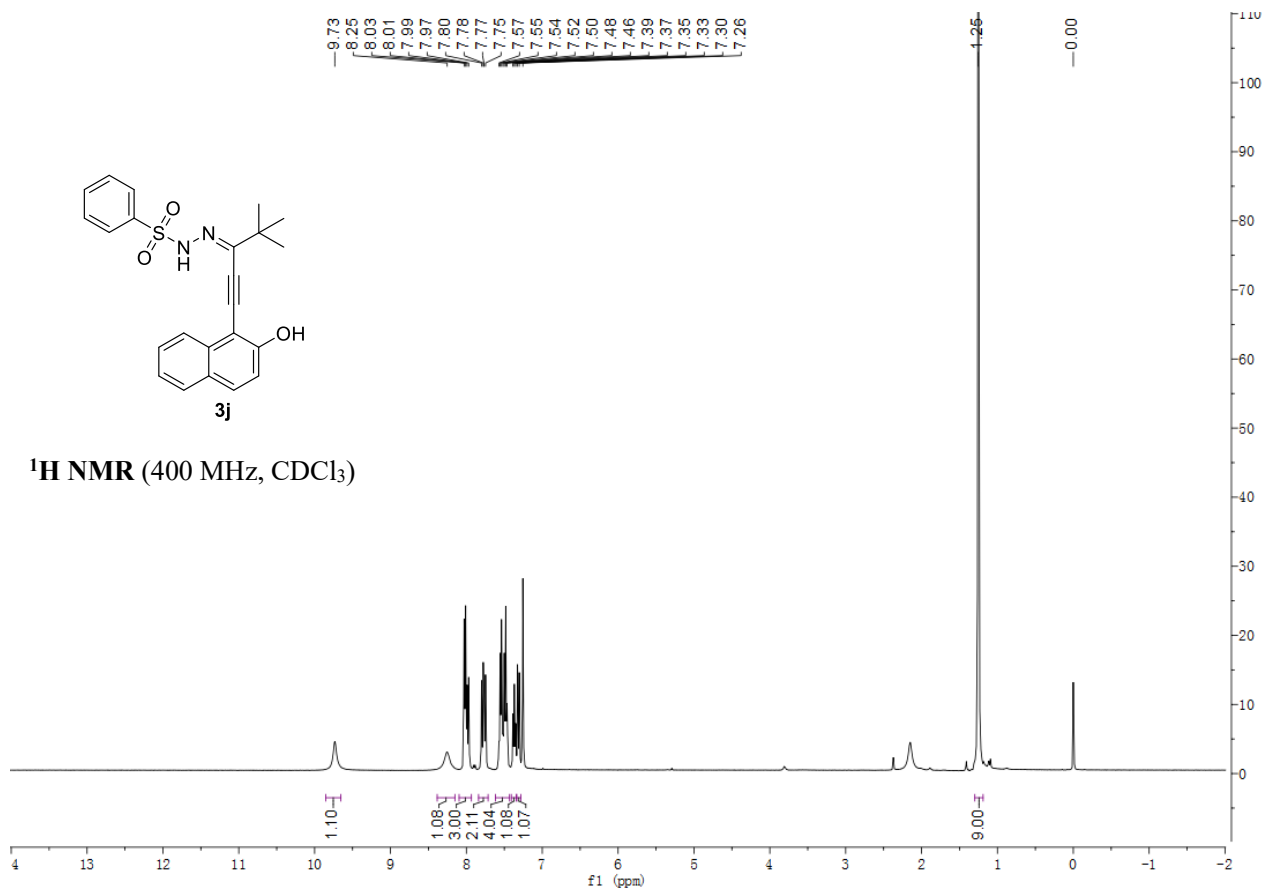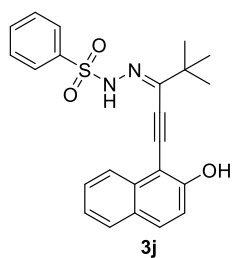

<sup>13</sup>C NMR (100 MHz, CDCl<sub>3</sub>)

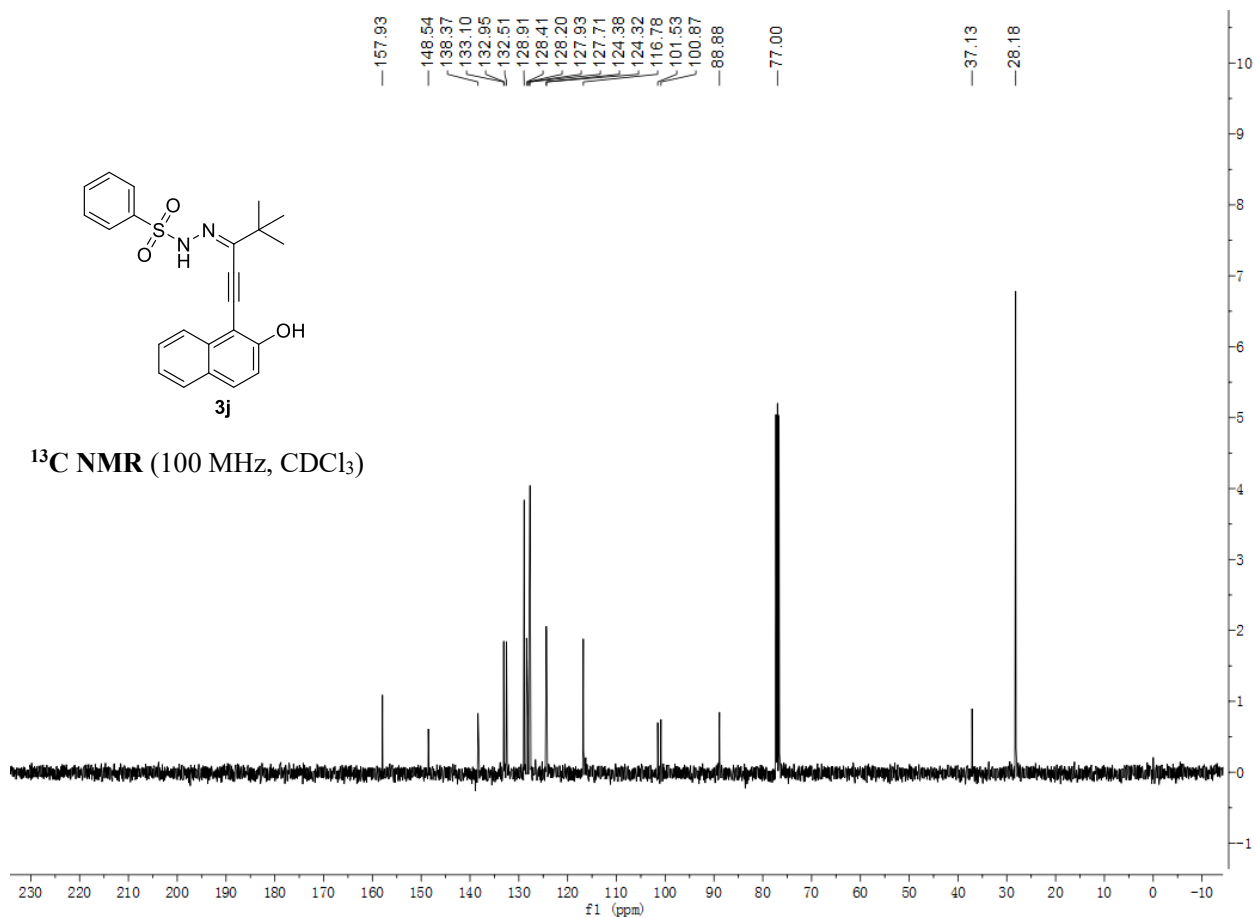

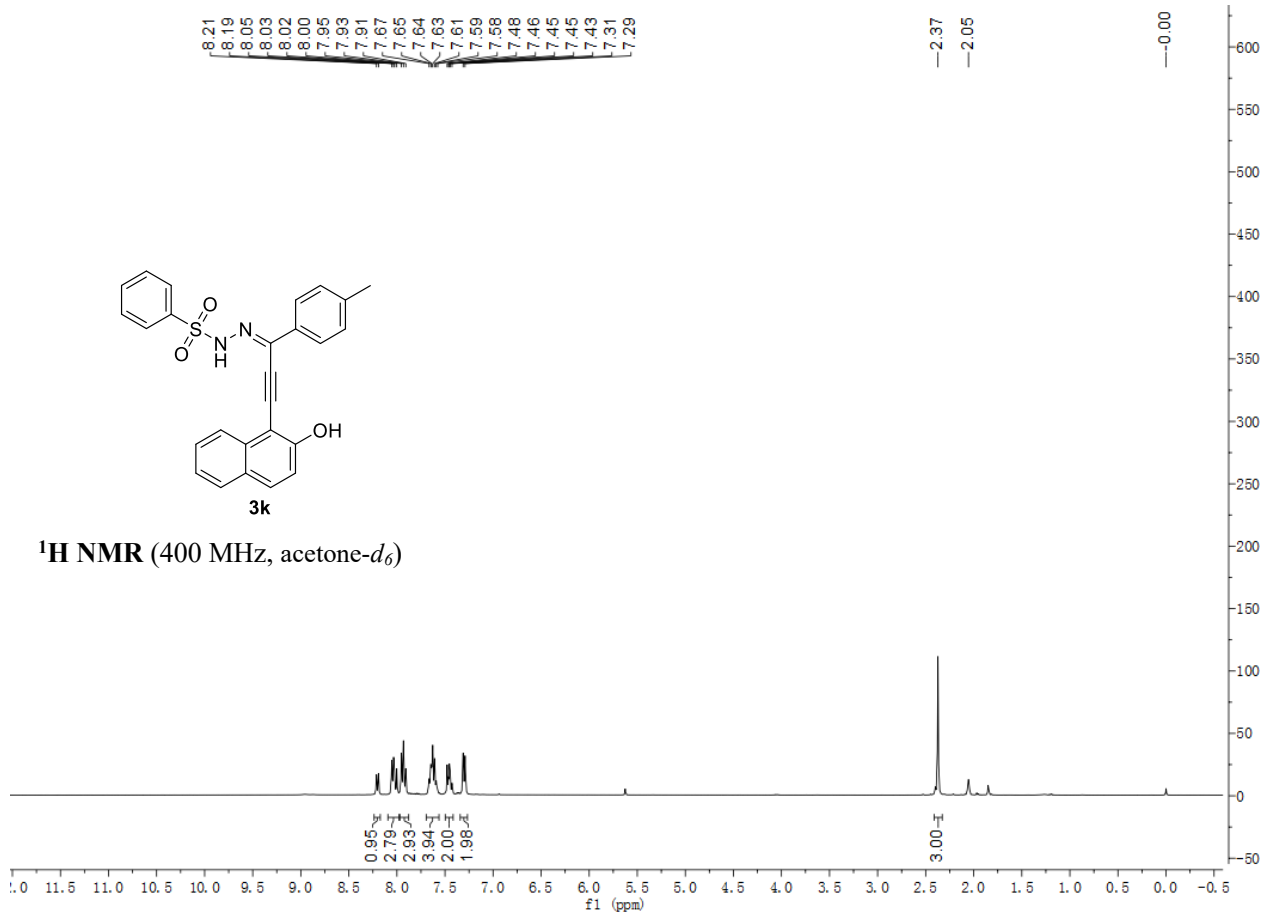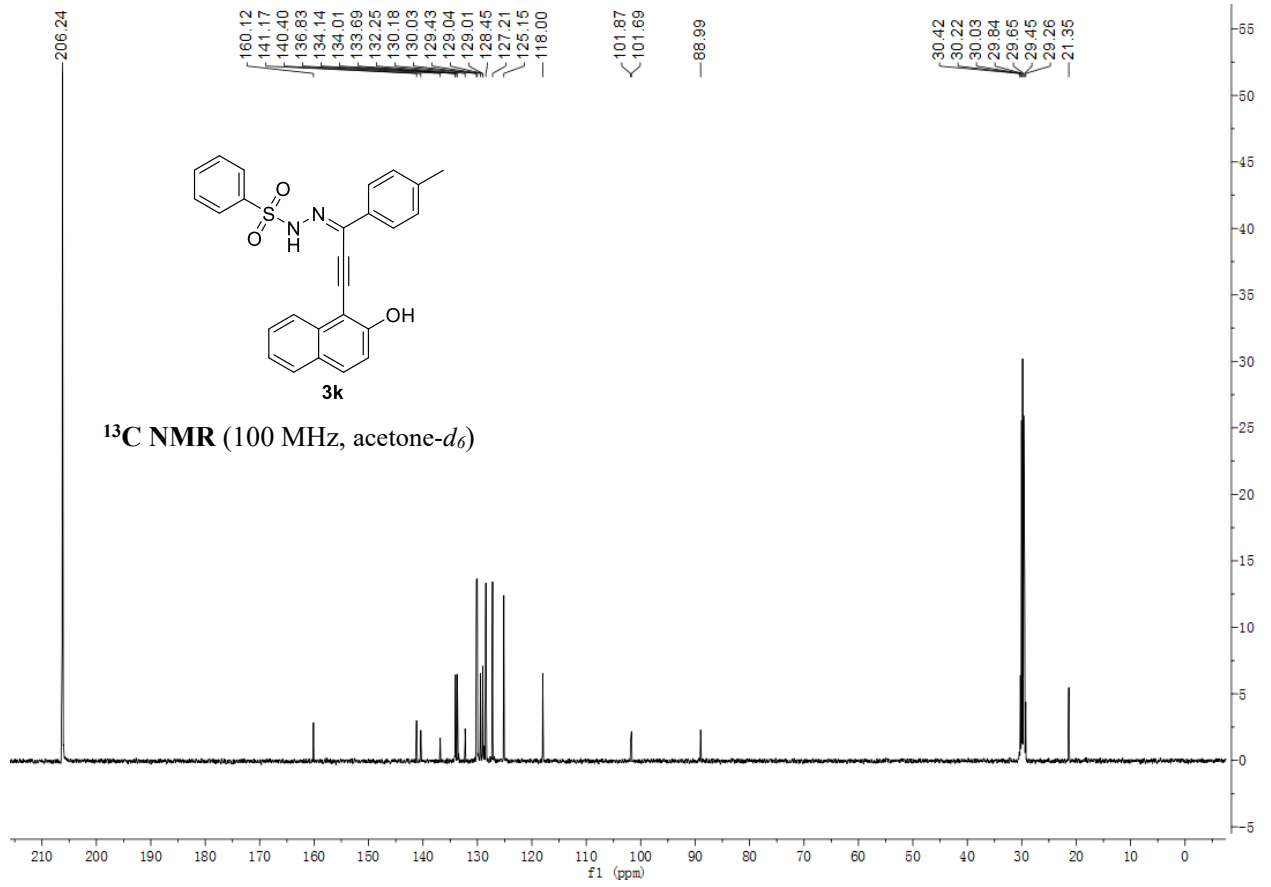

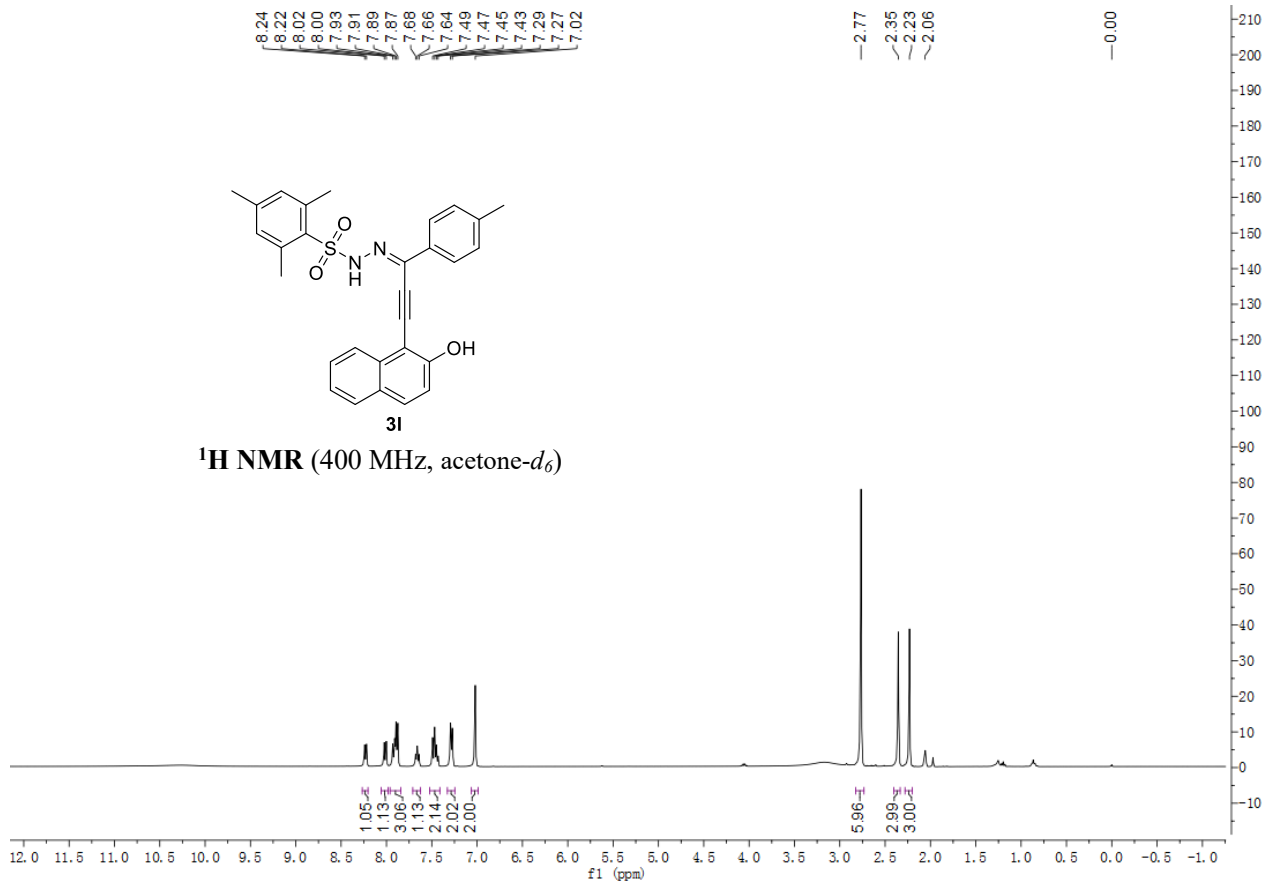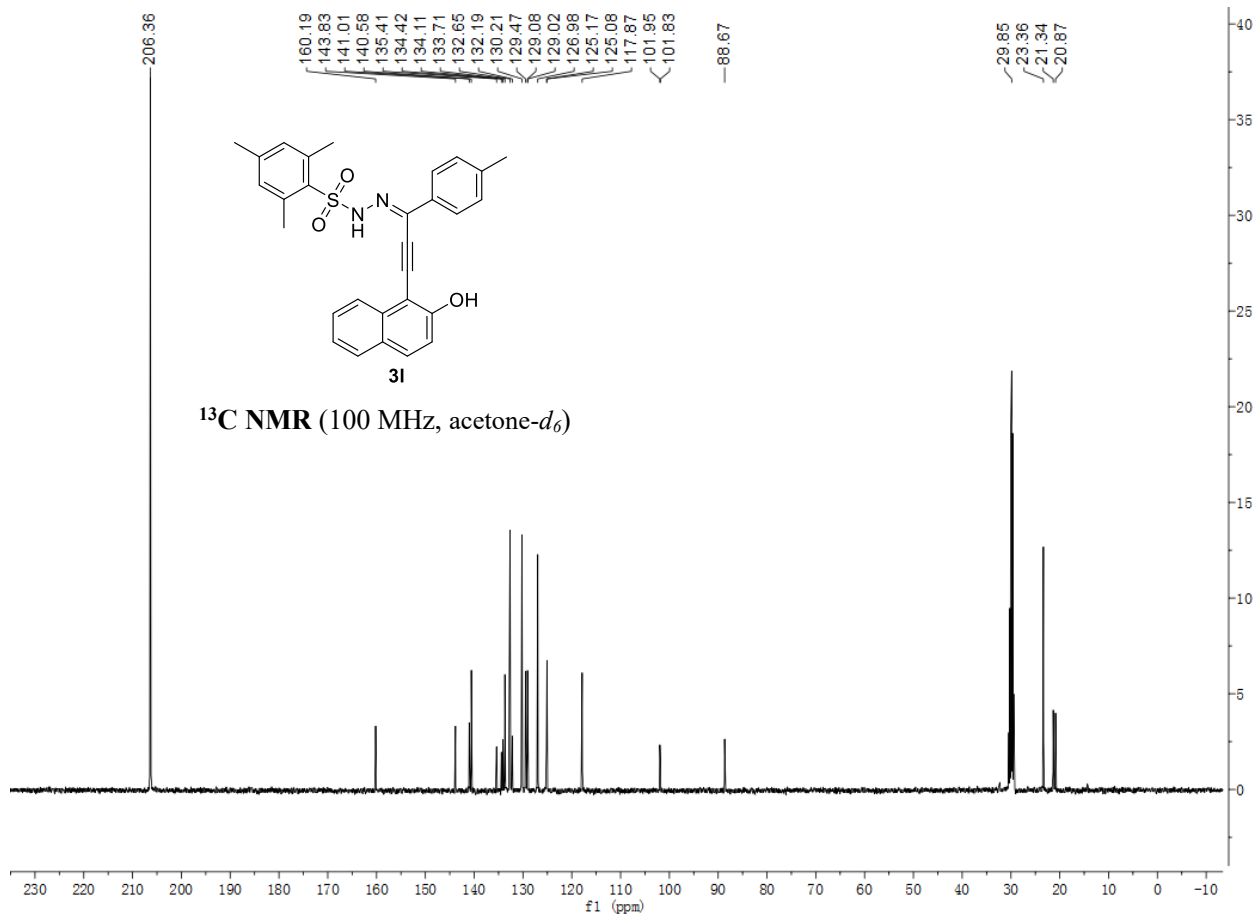

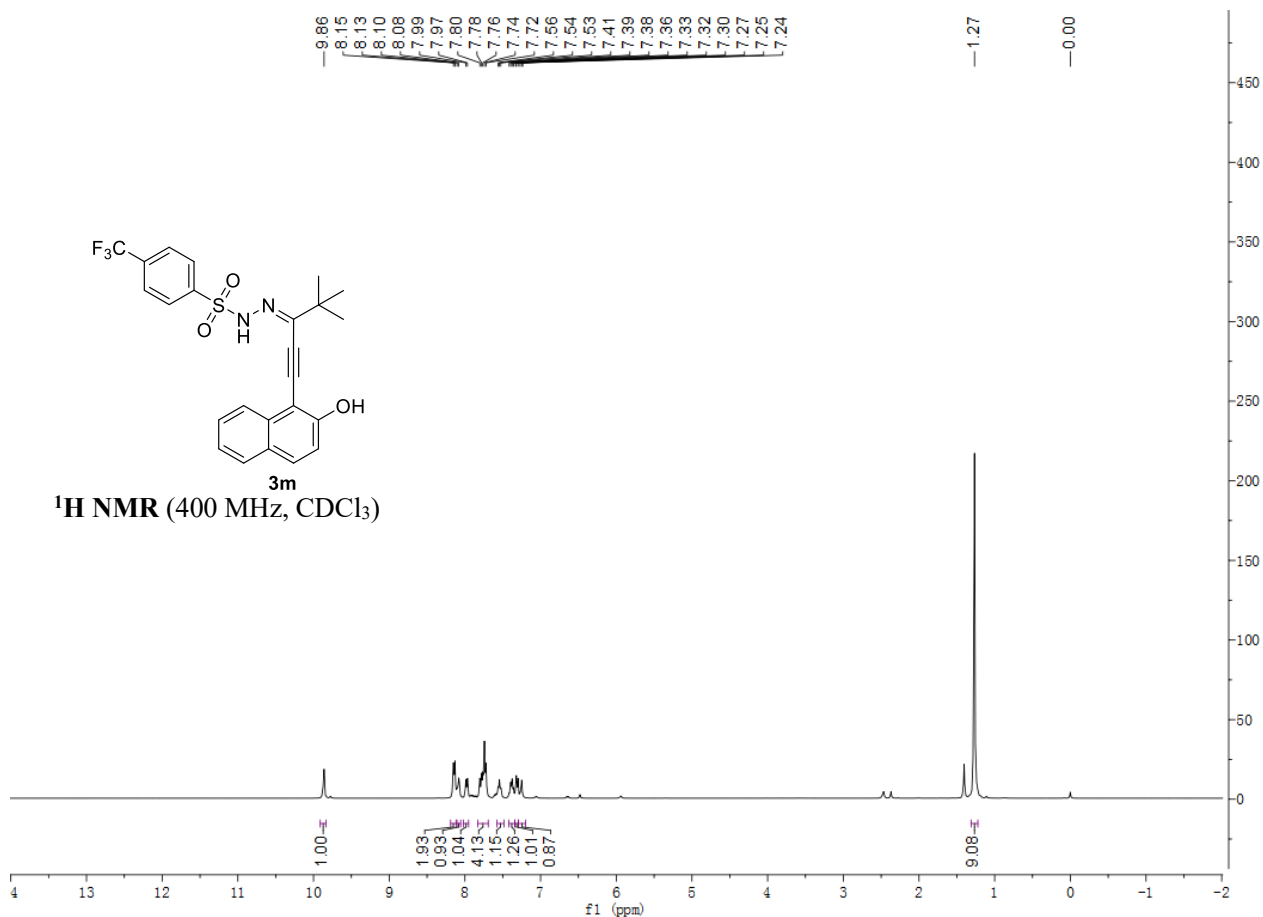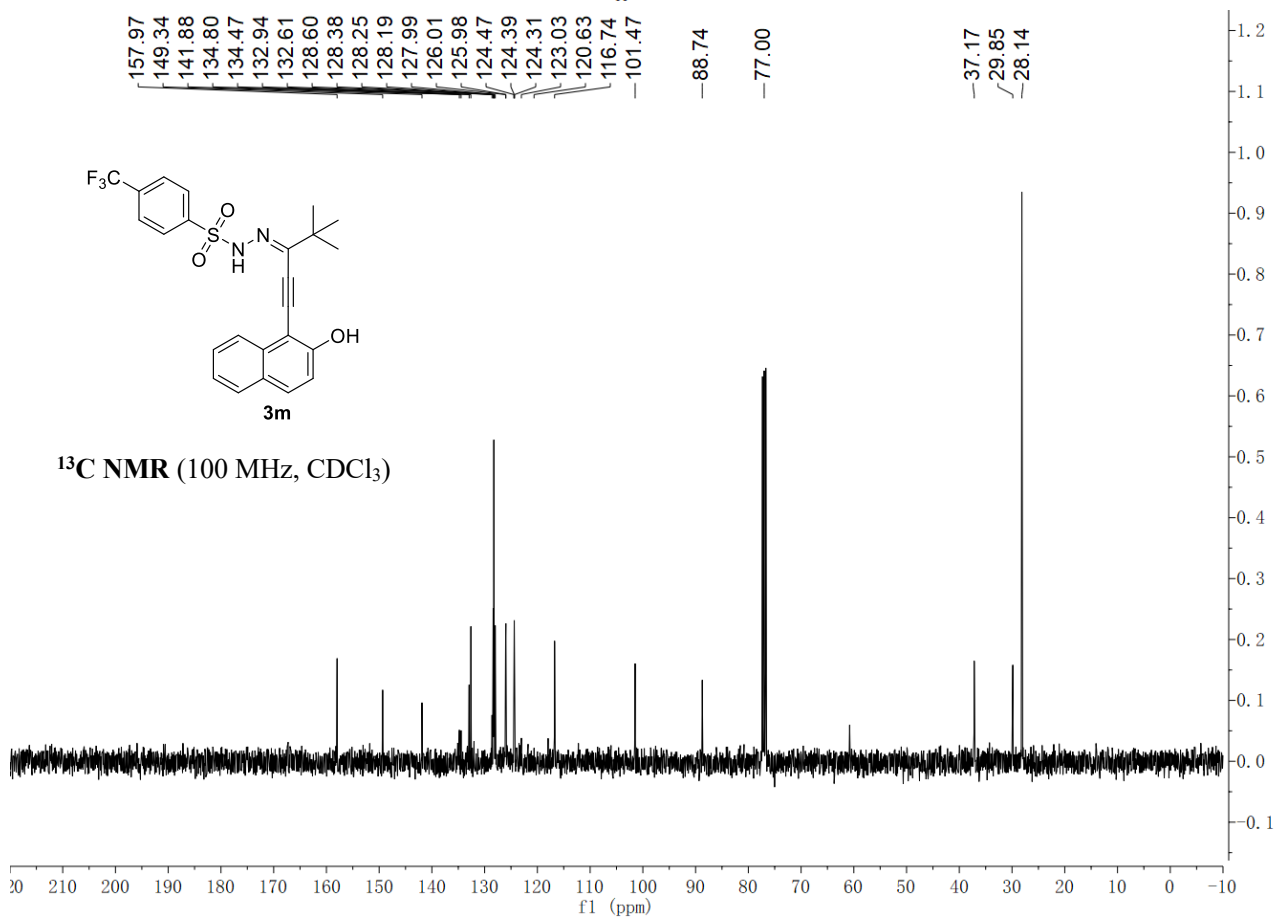

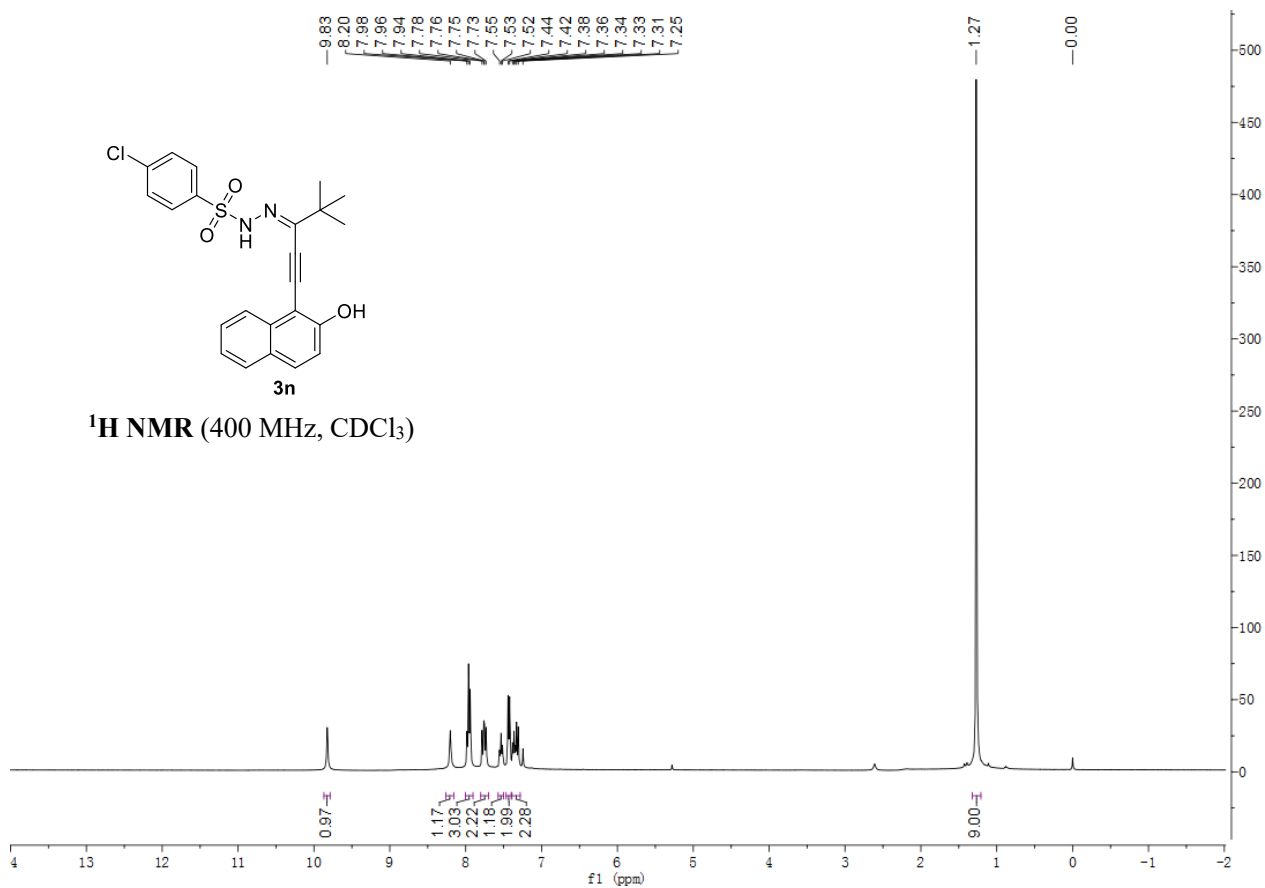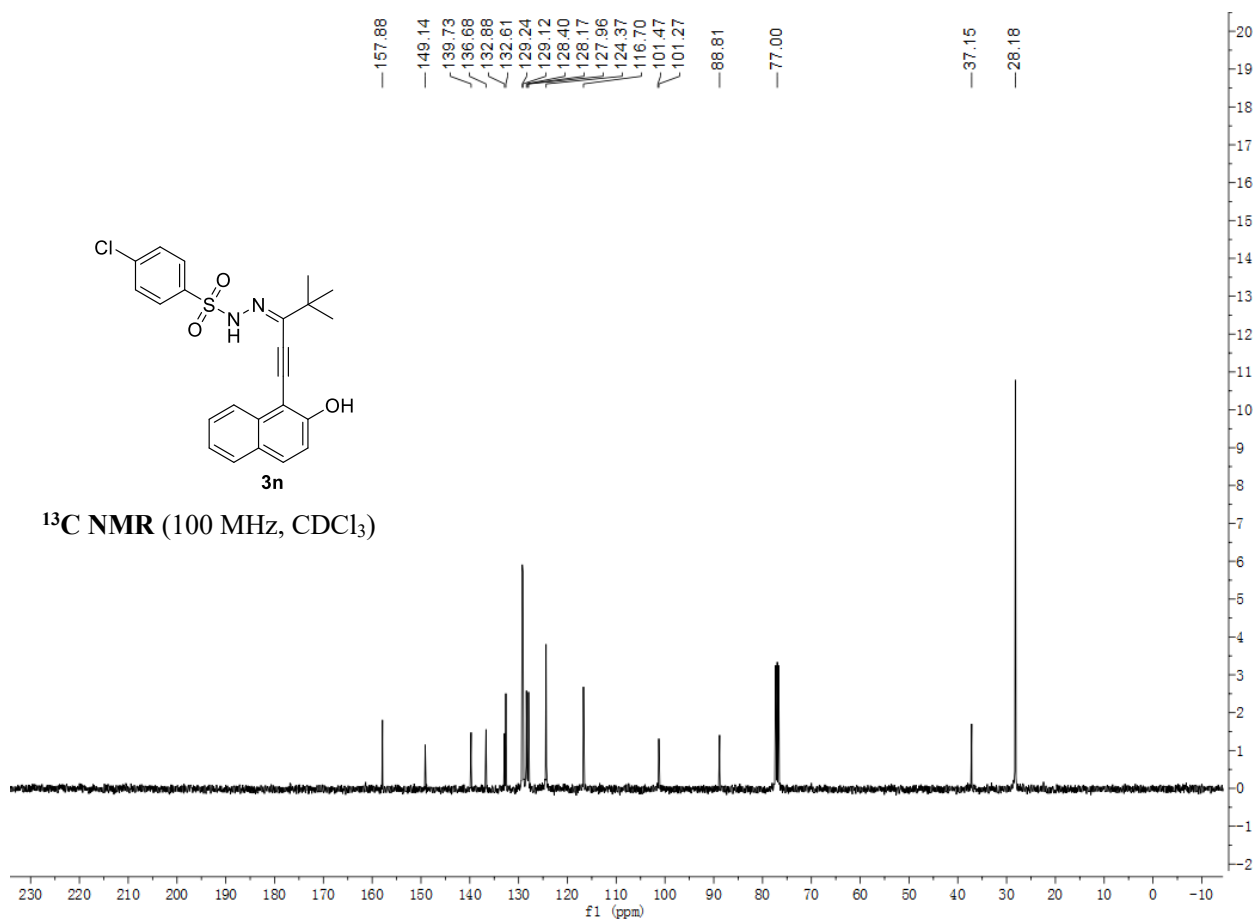

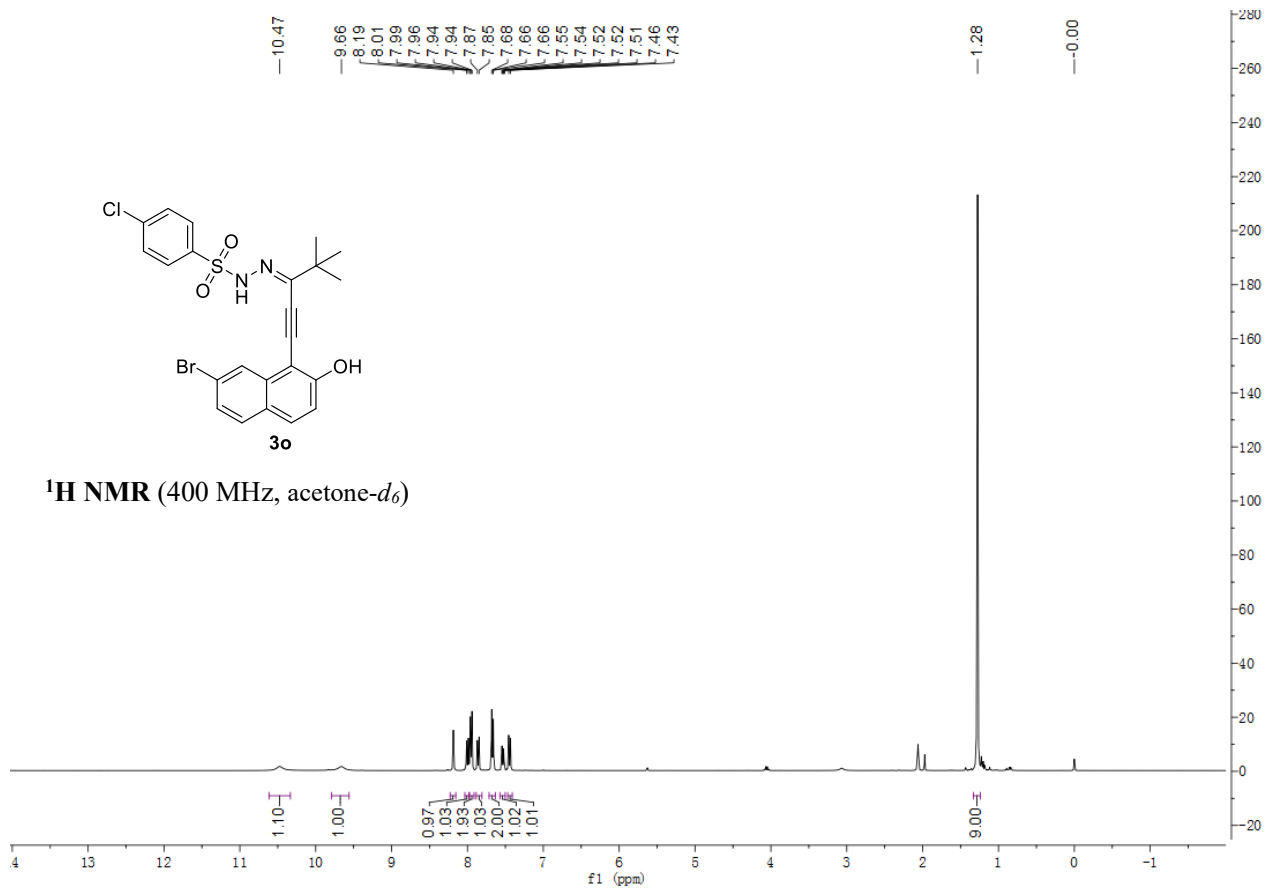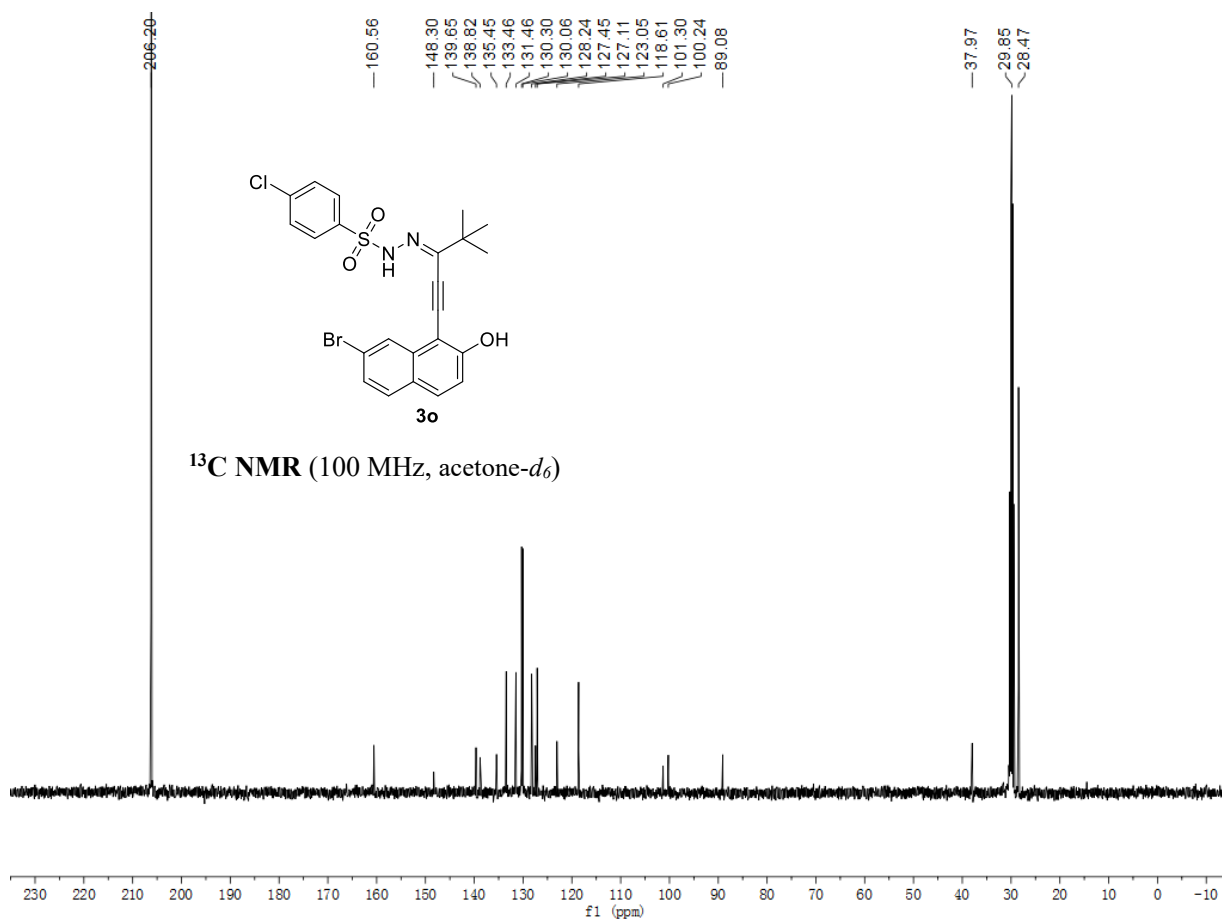

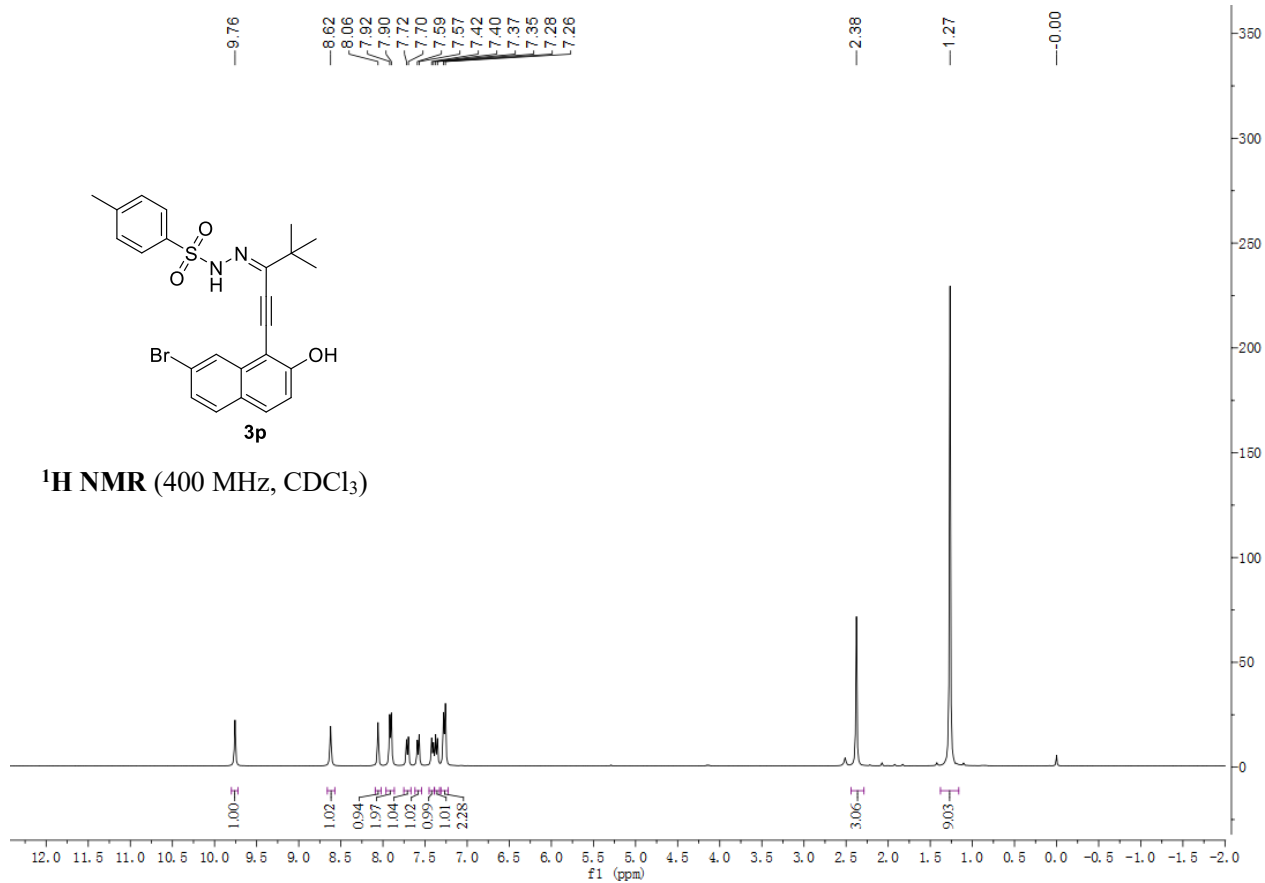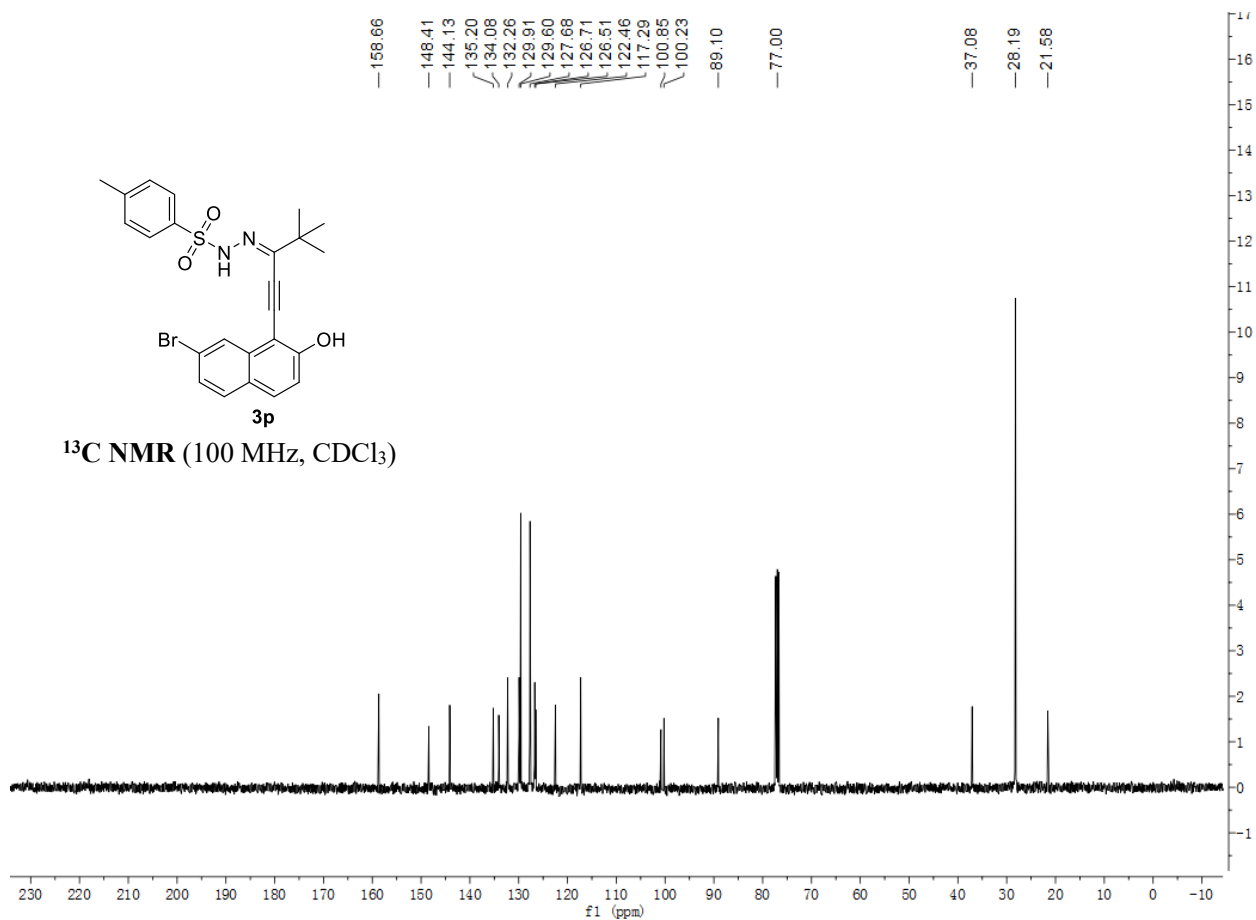



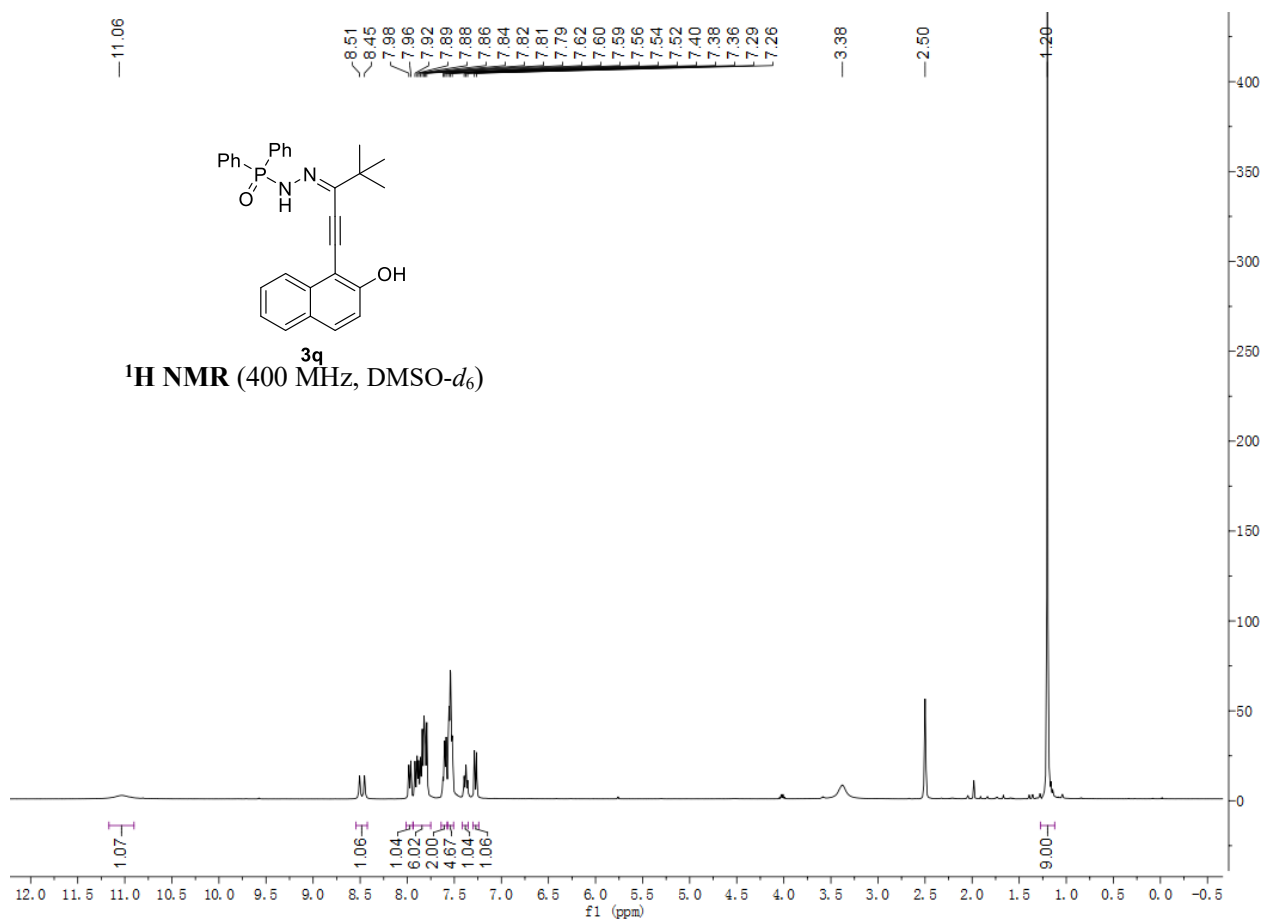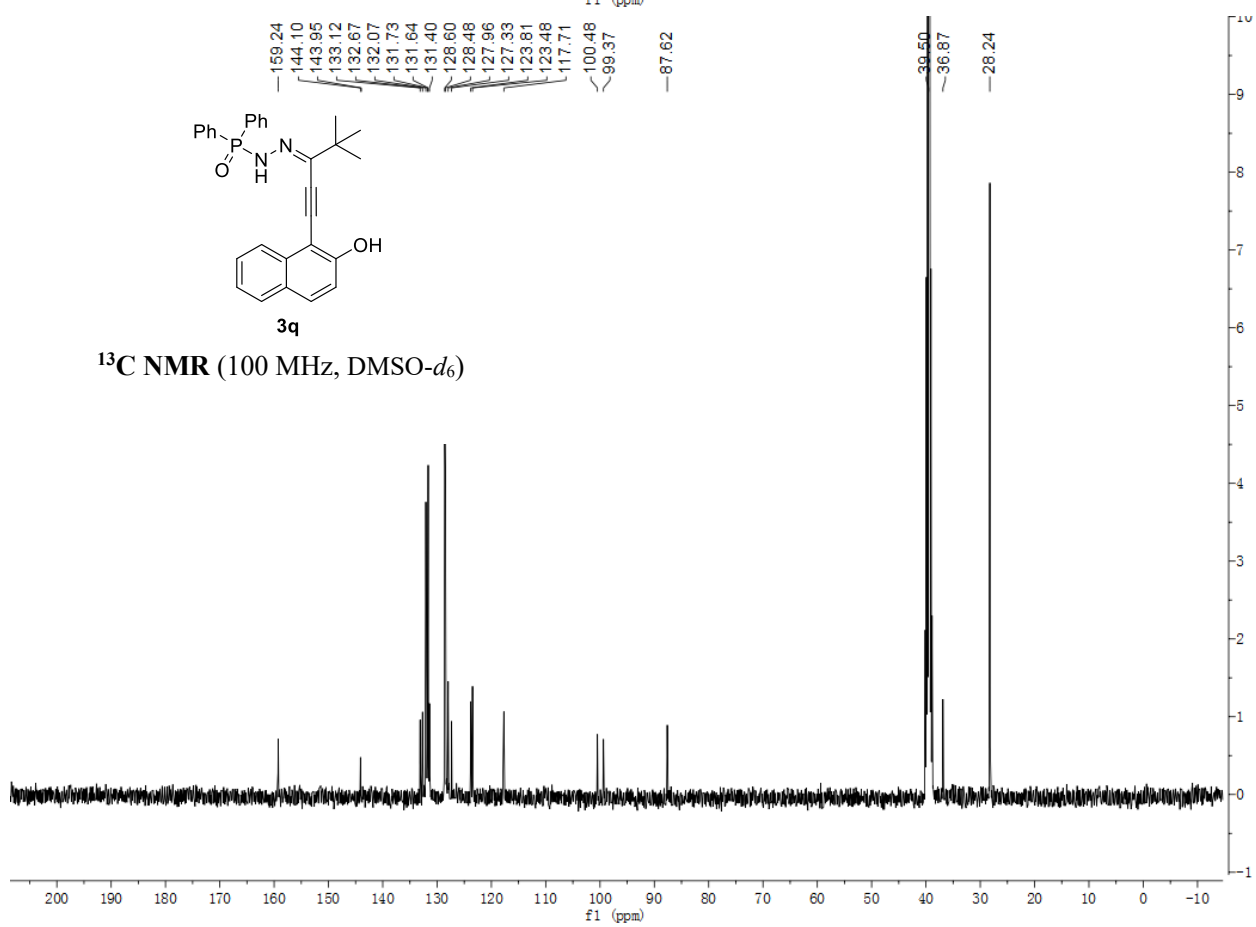

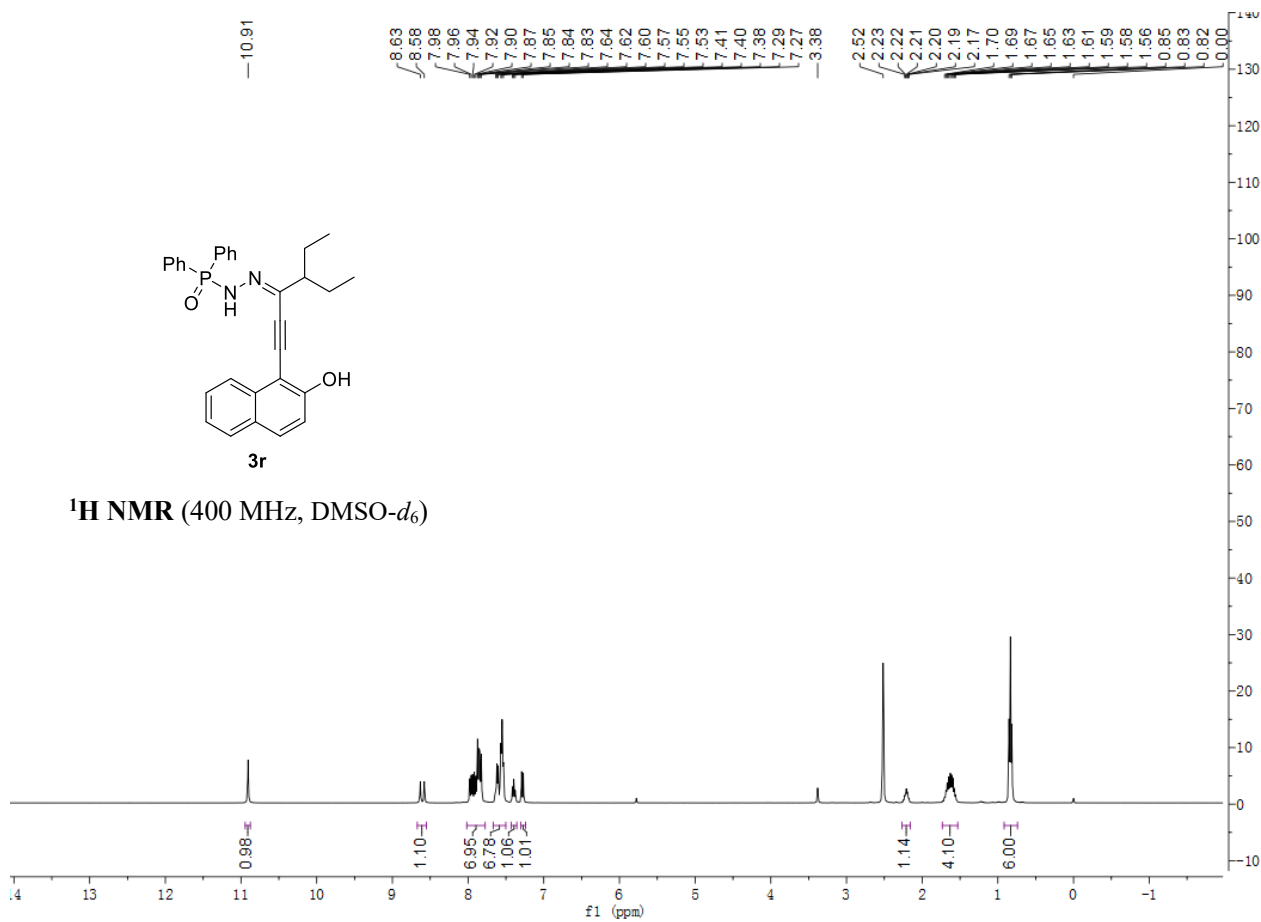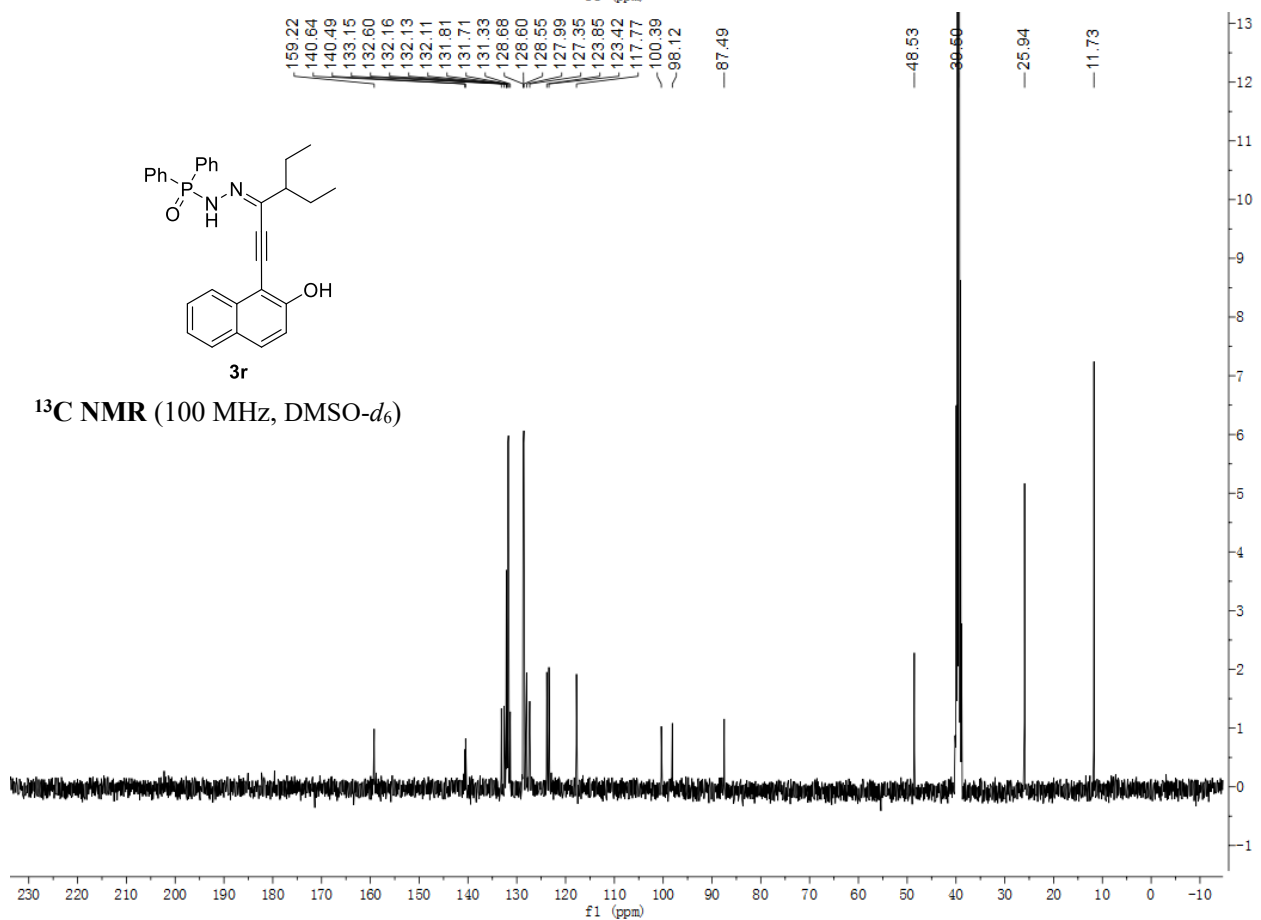

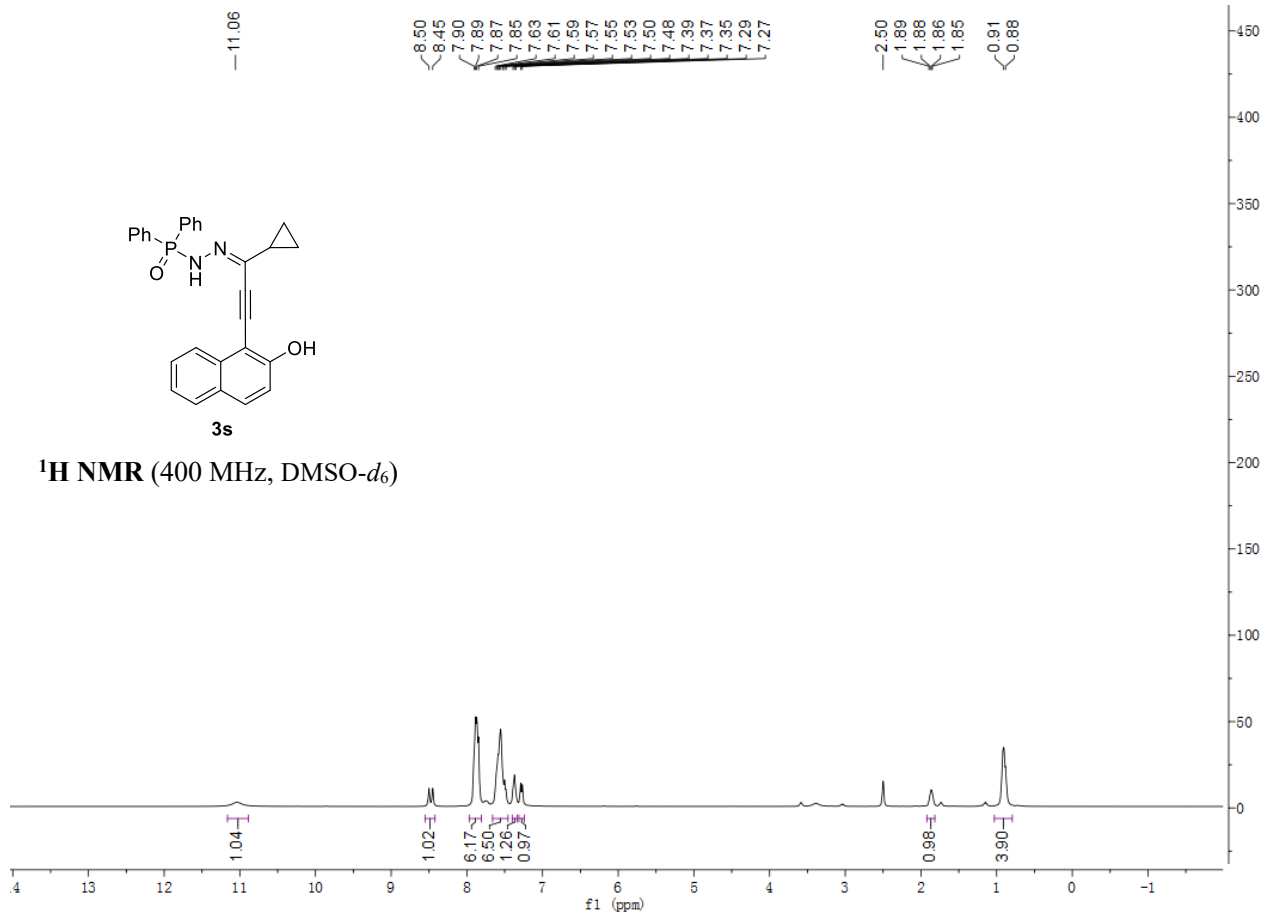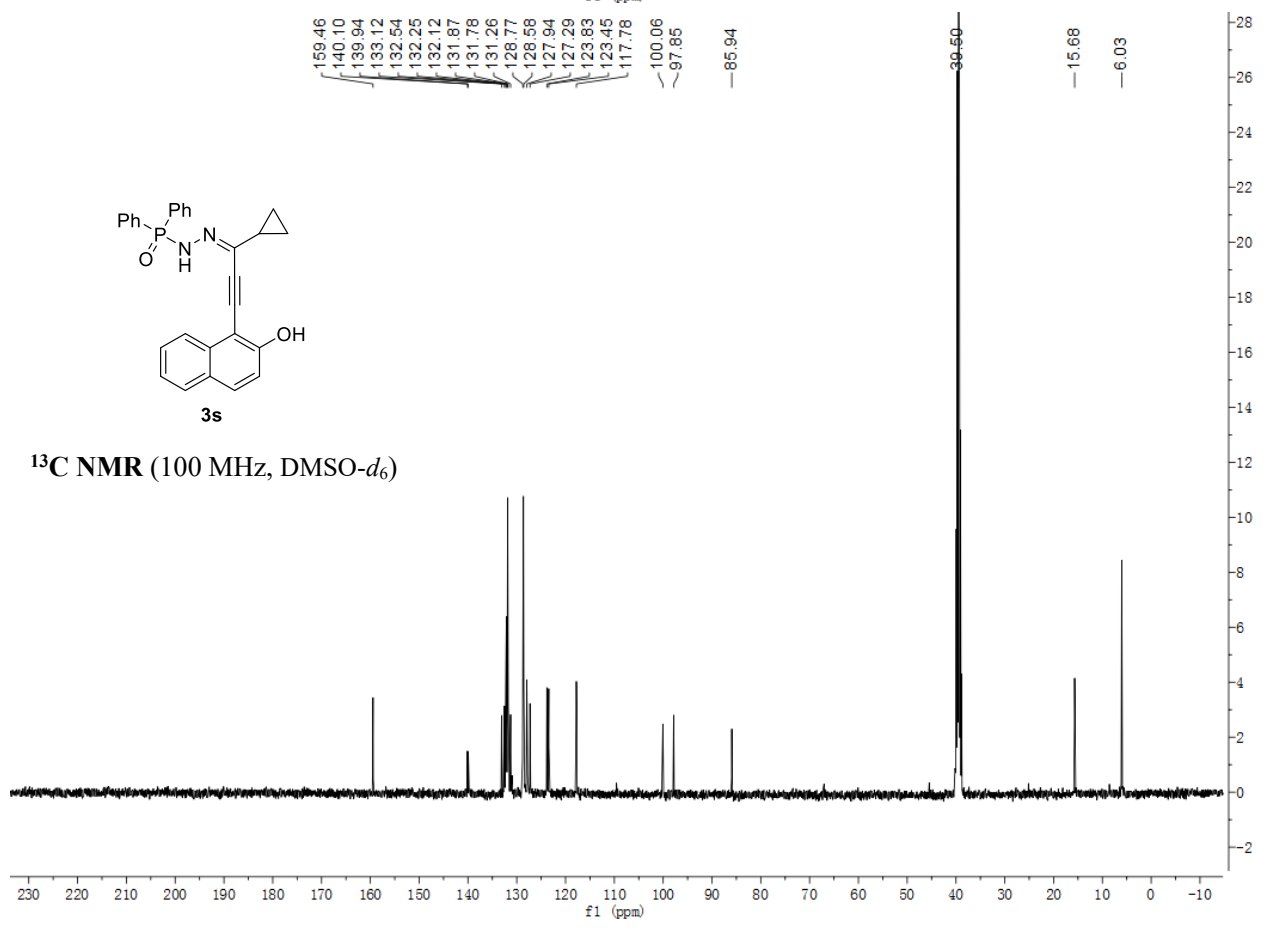

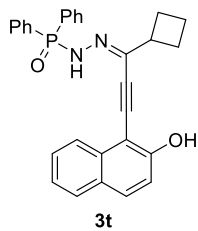

<sup>1</sup>H NMR (400 MHz, DMSO-*d*<sub>6</sub>)

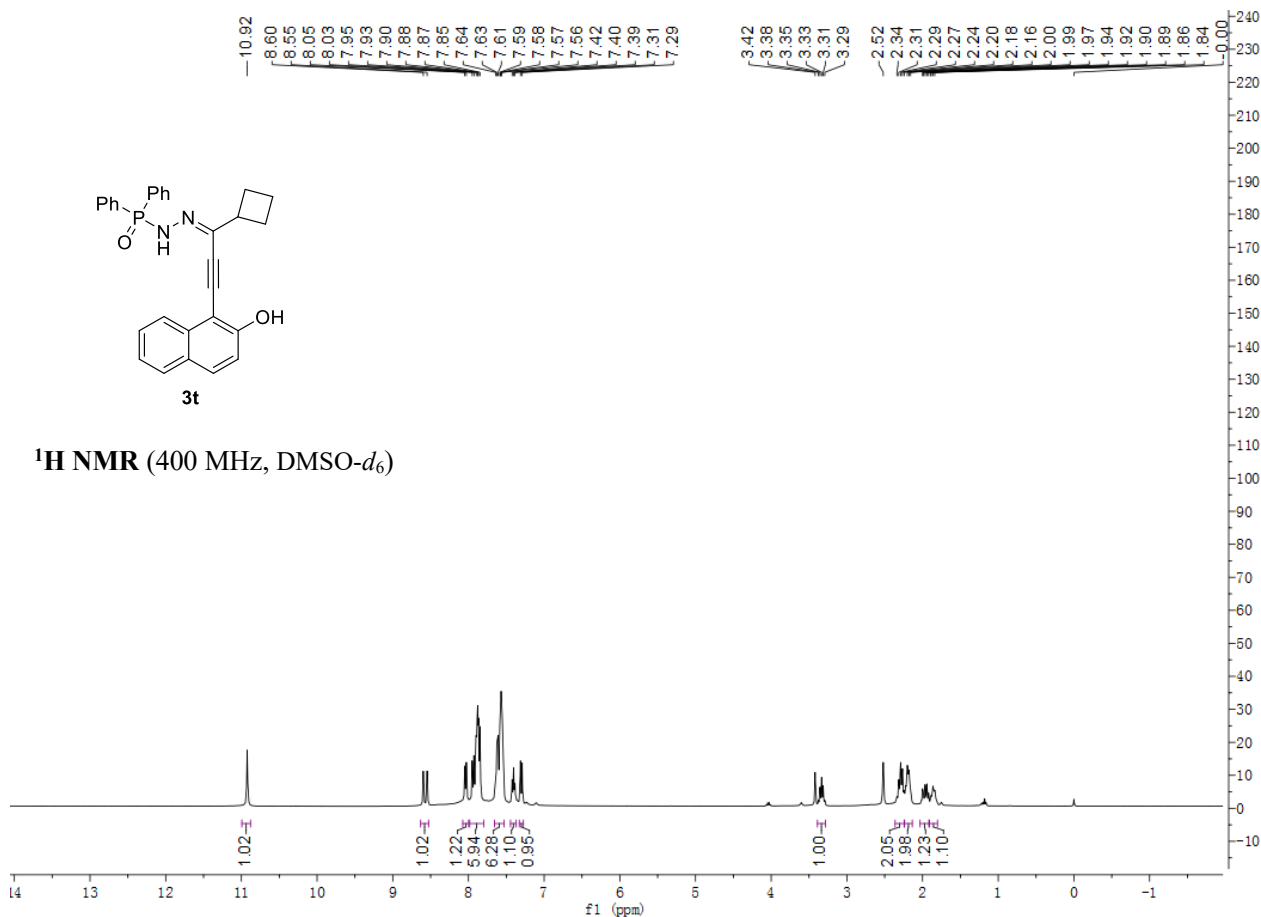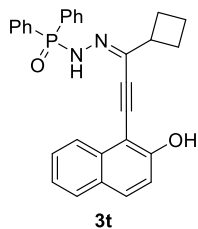

<sup>13</sup>C NMR (100 MHz, DMSO-*d*<sub>6</sub>)

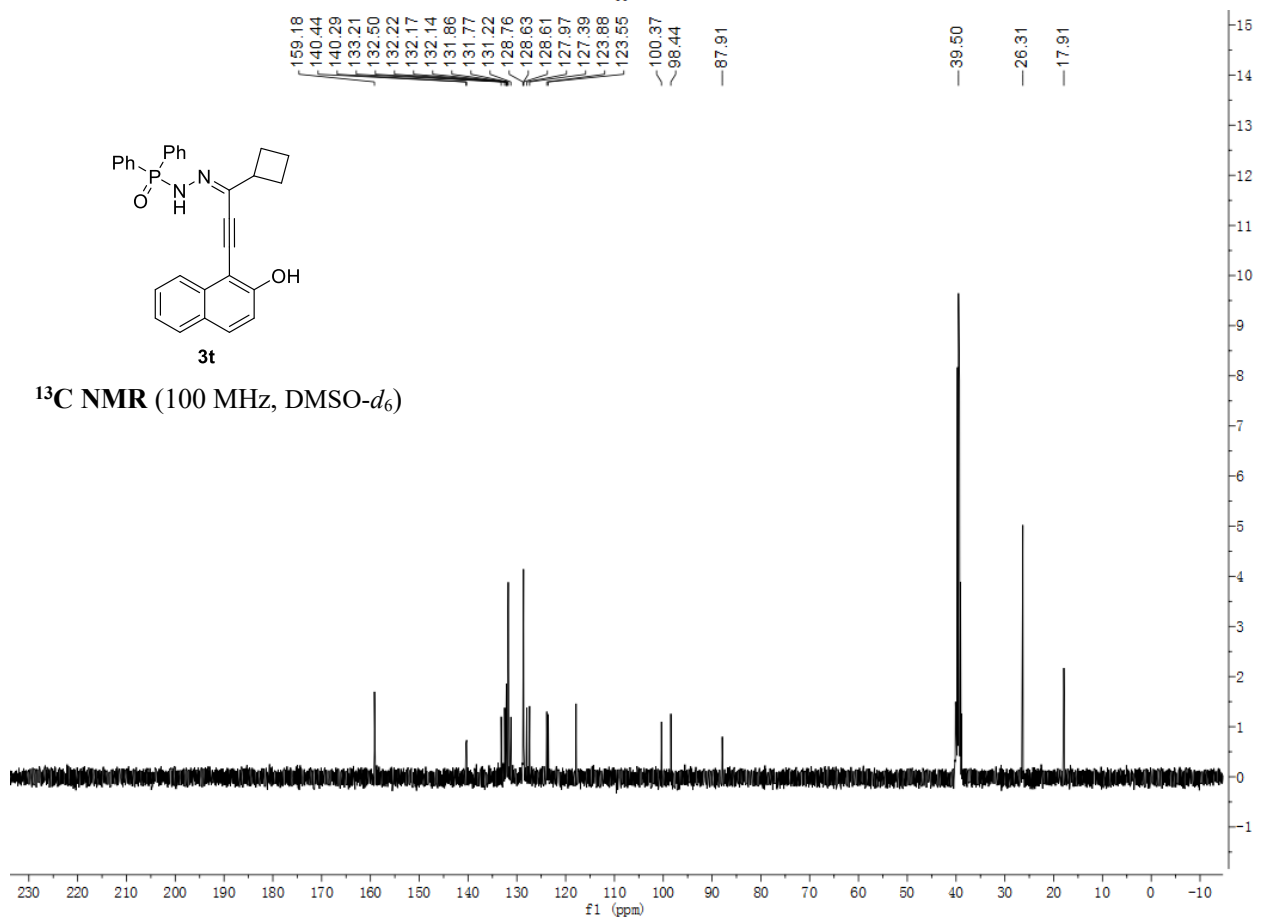

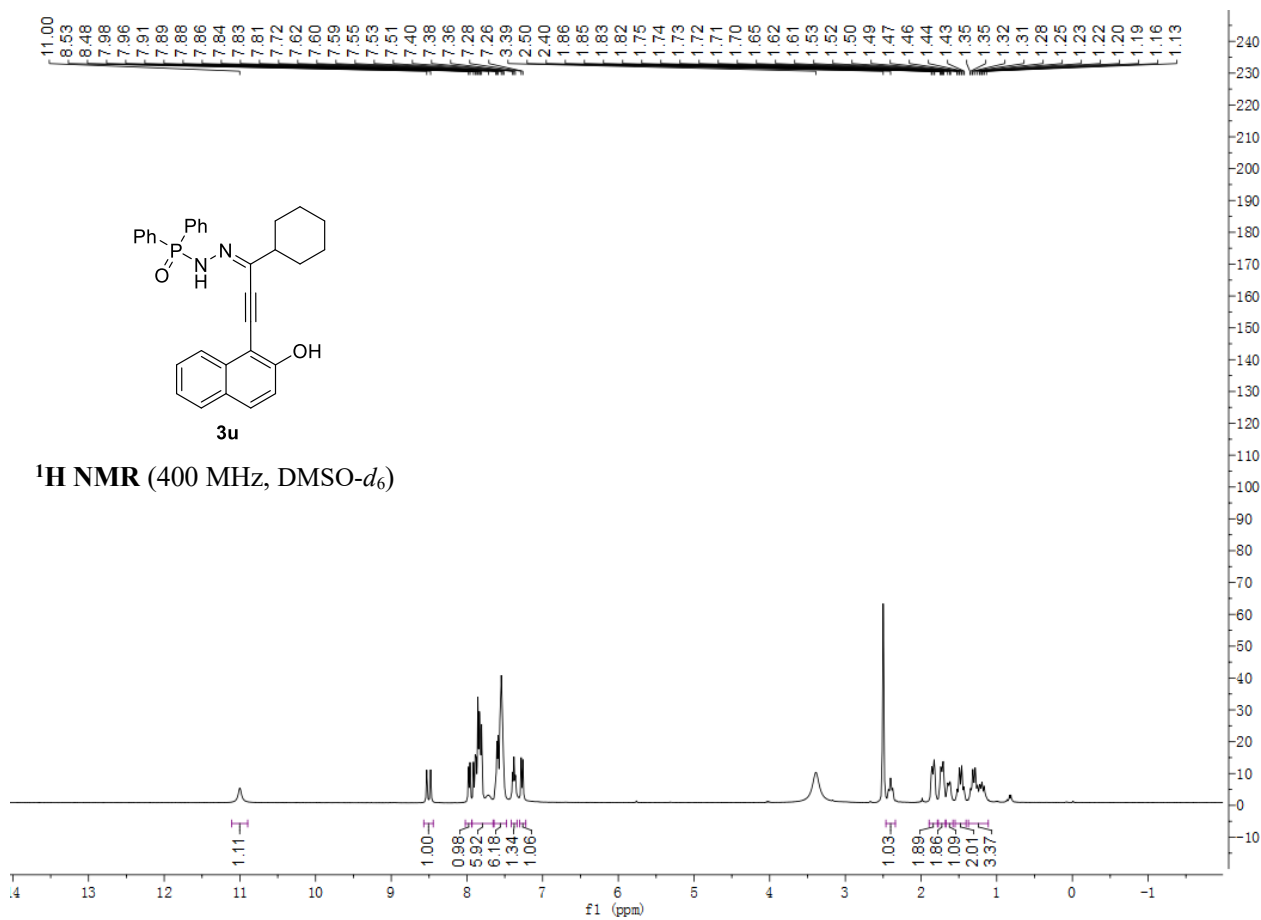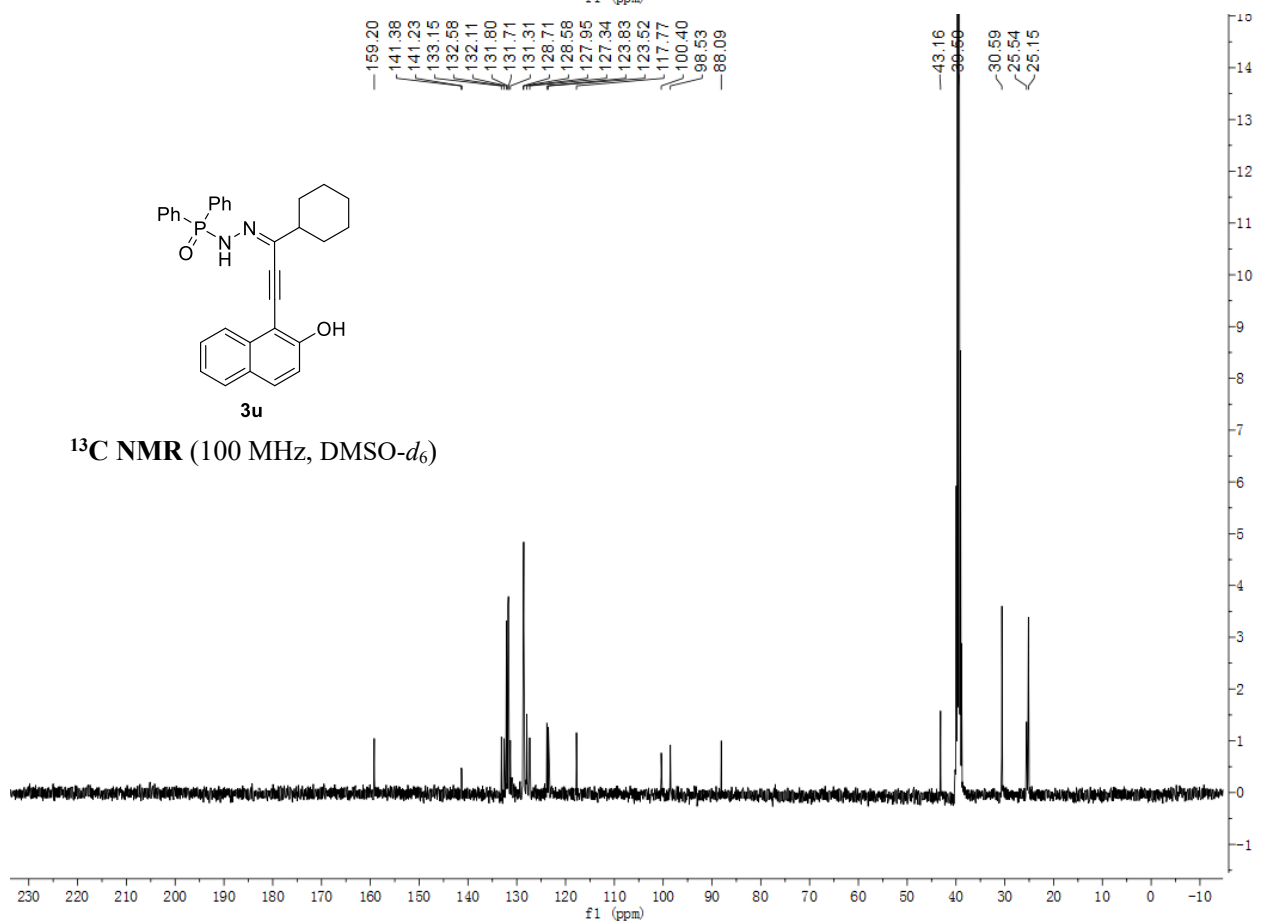

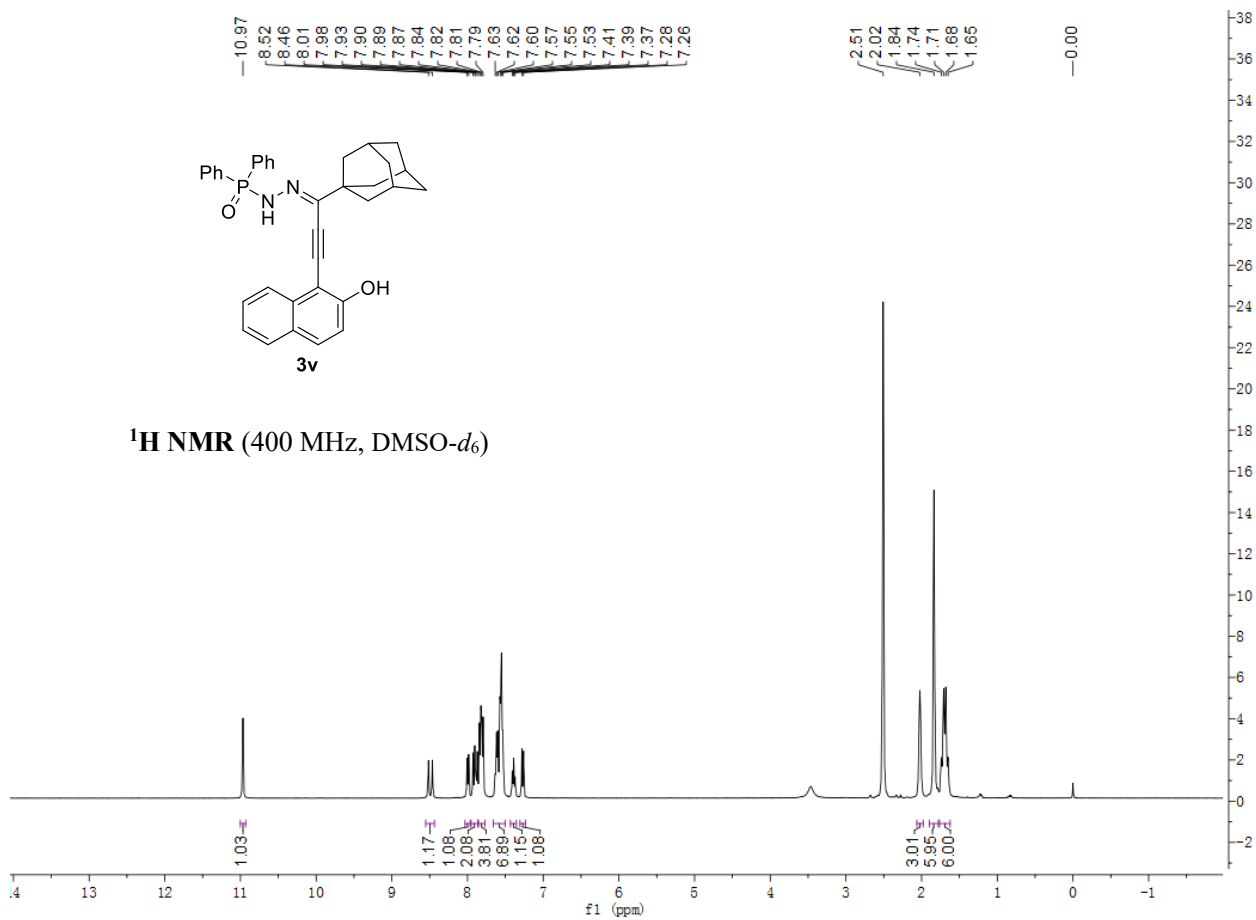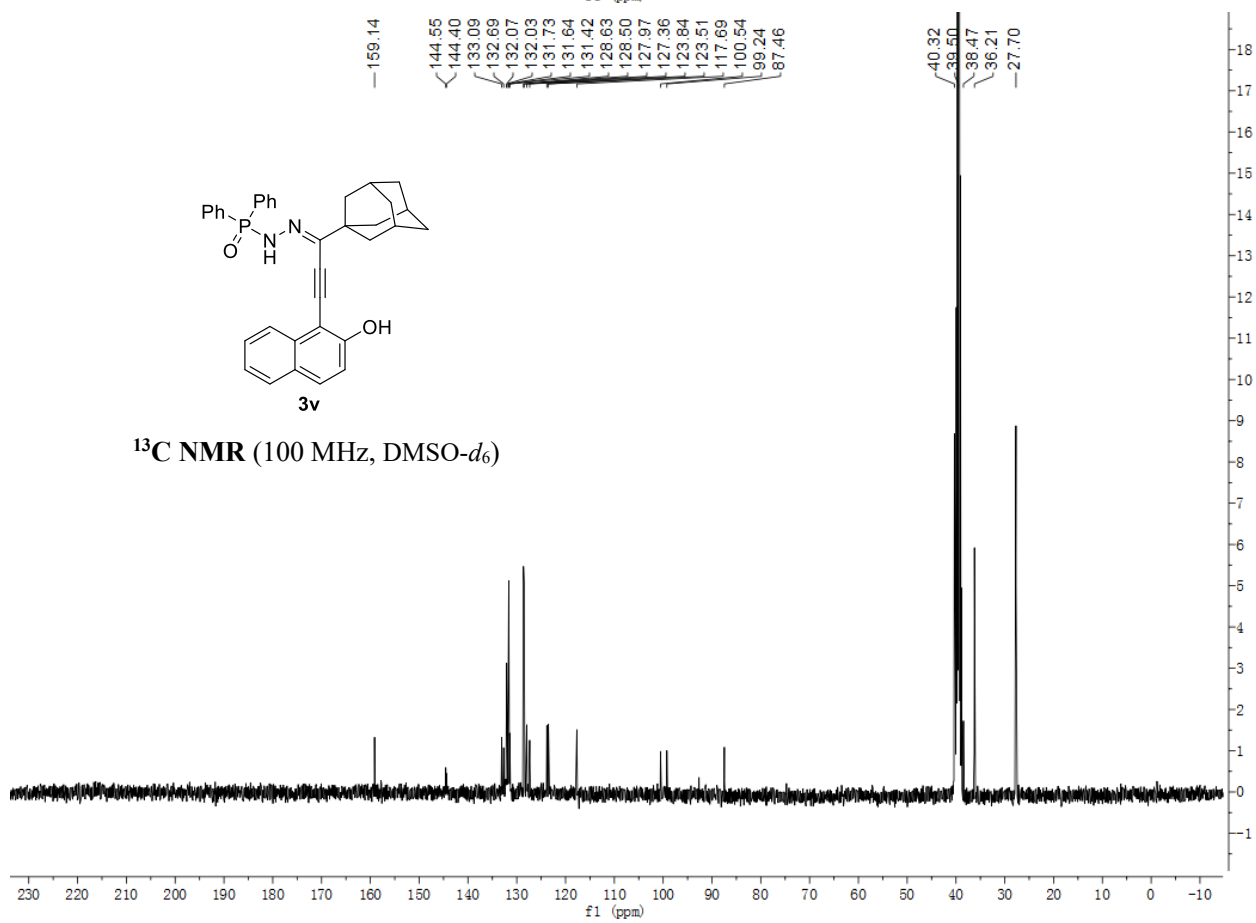

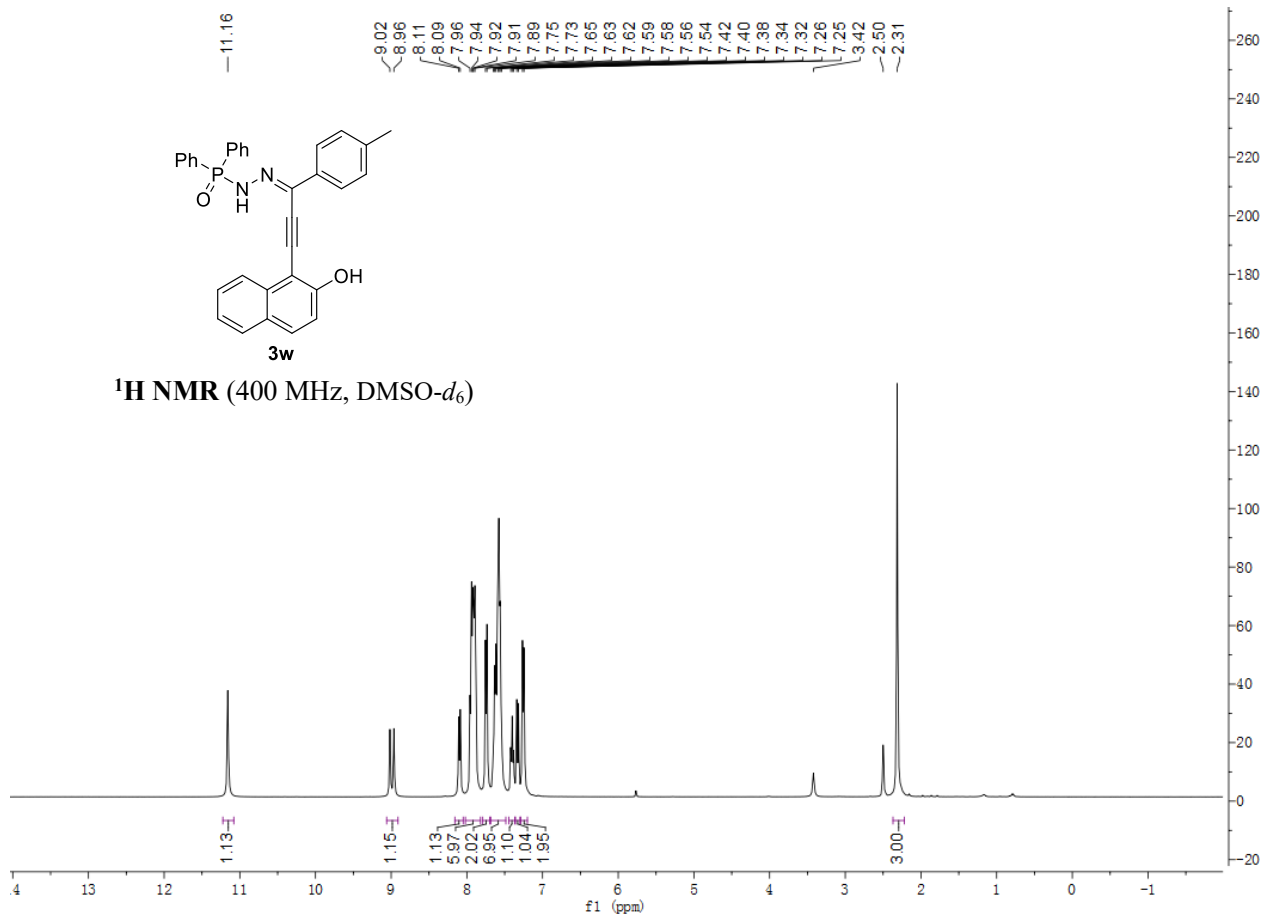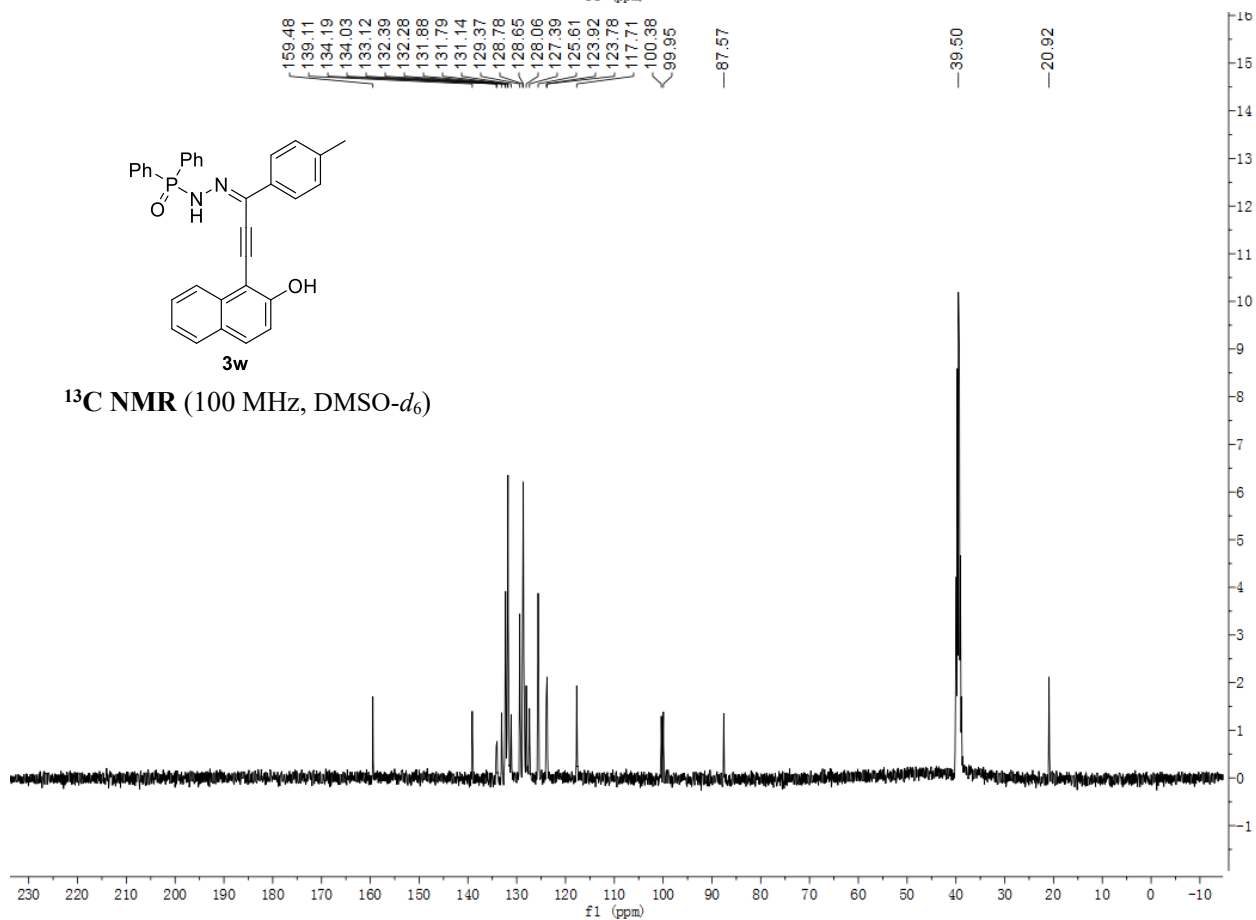

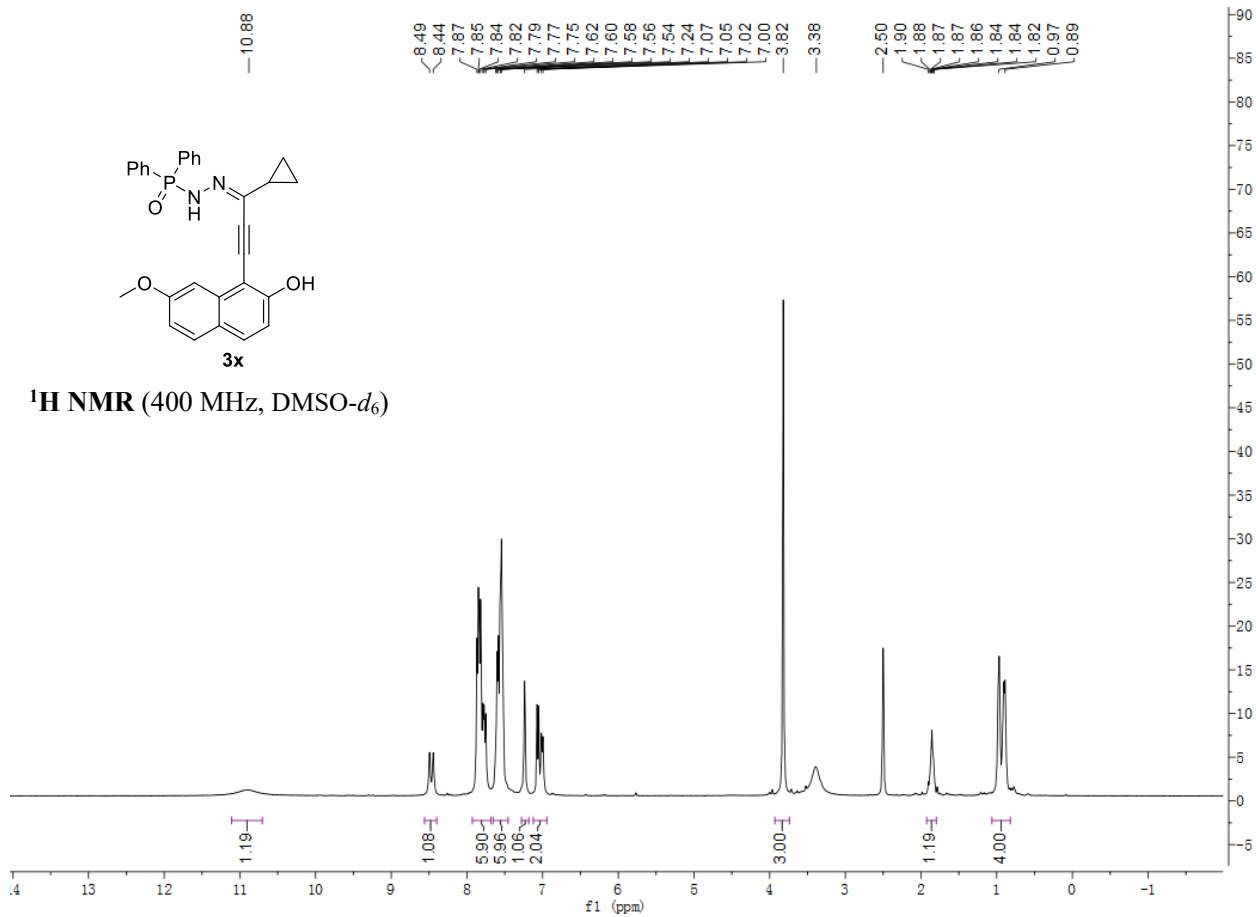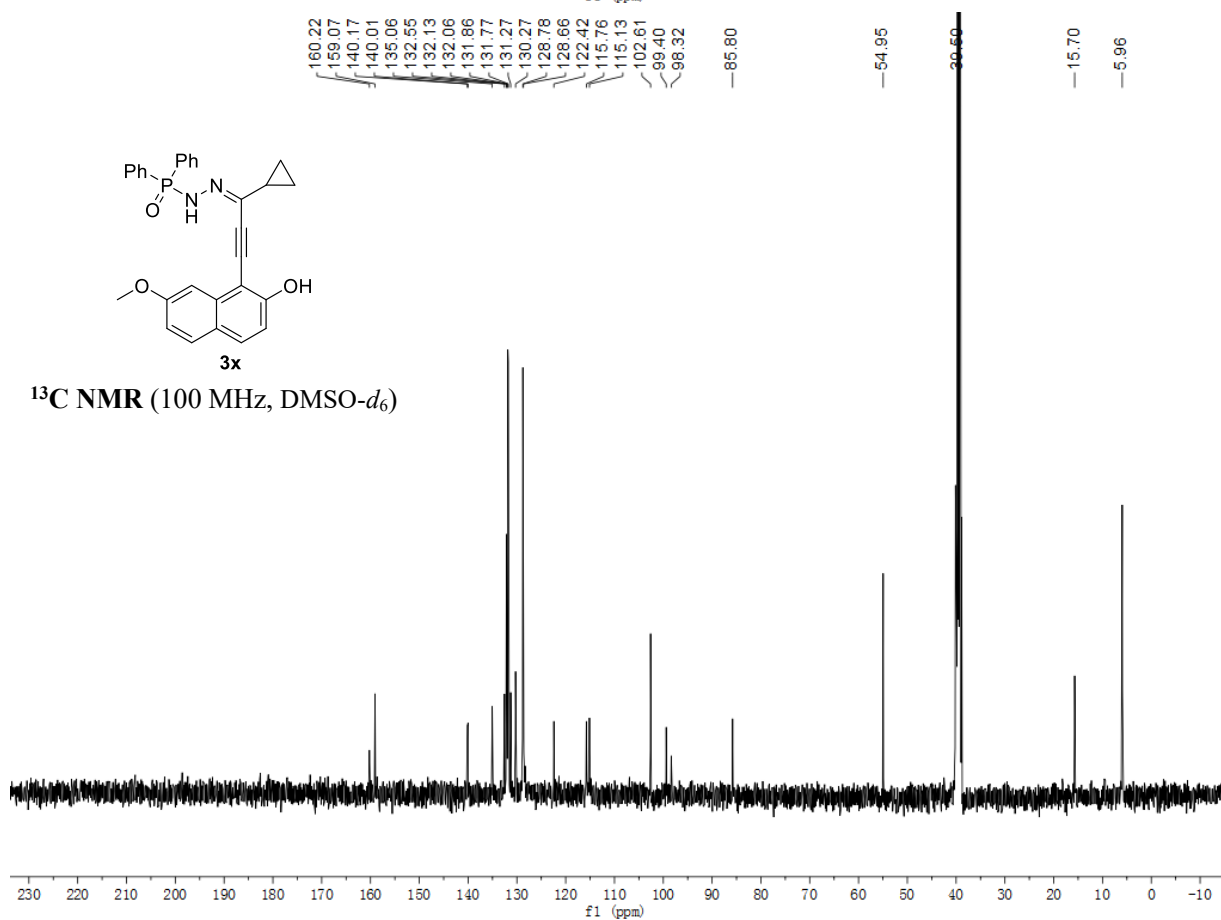



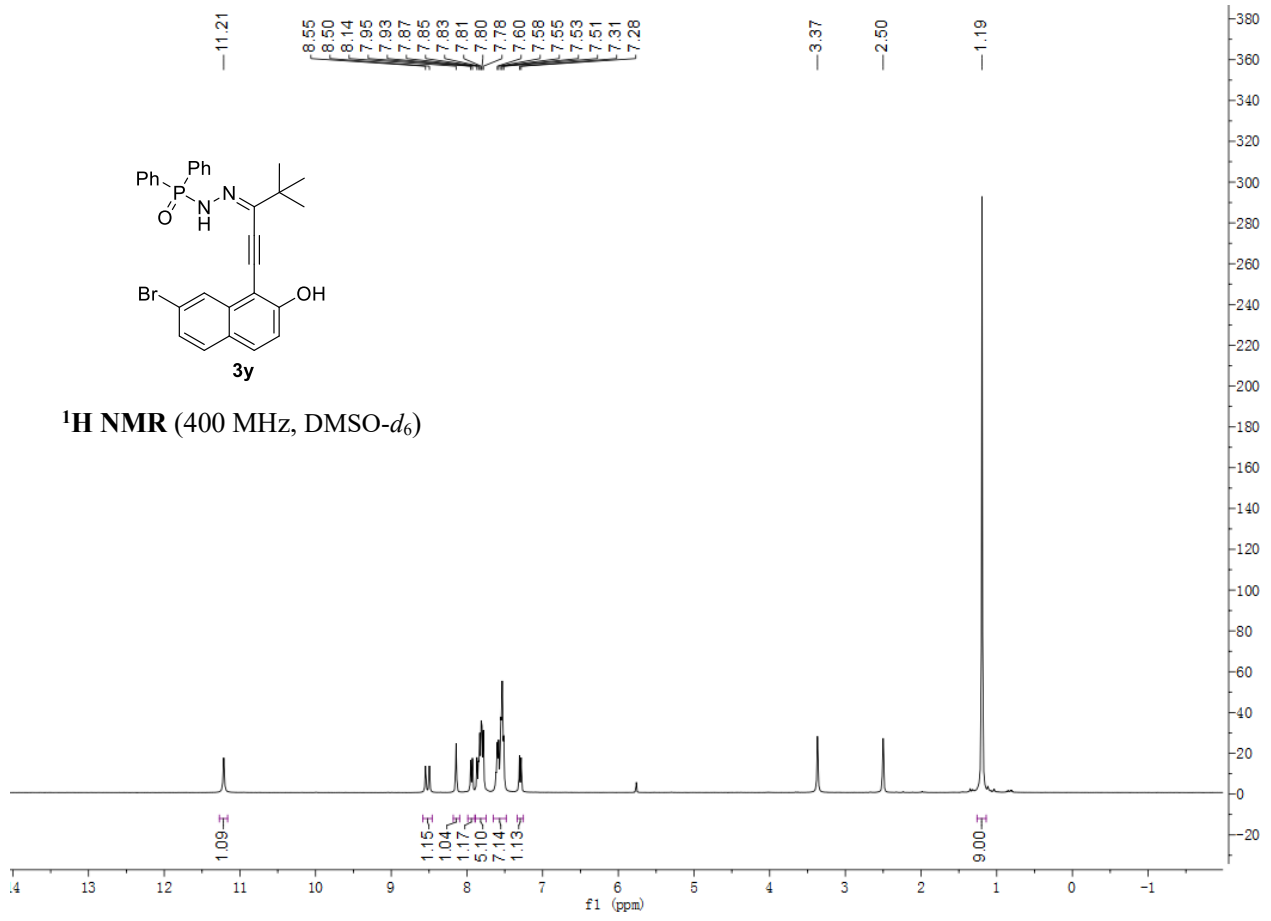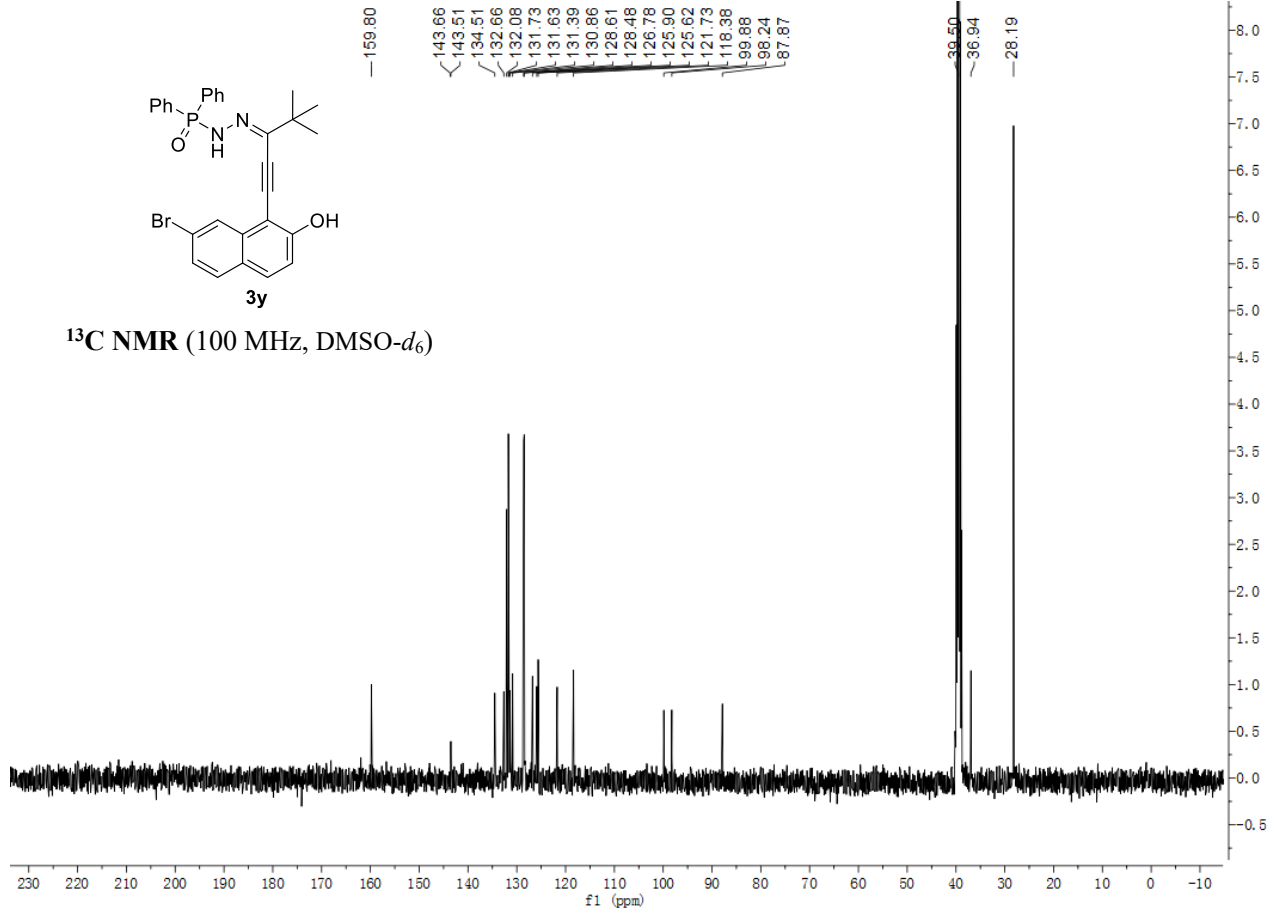

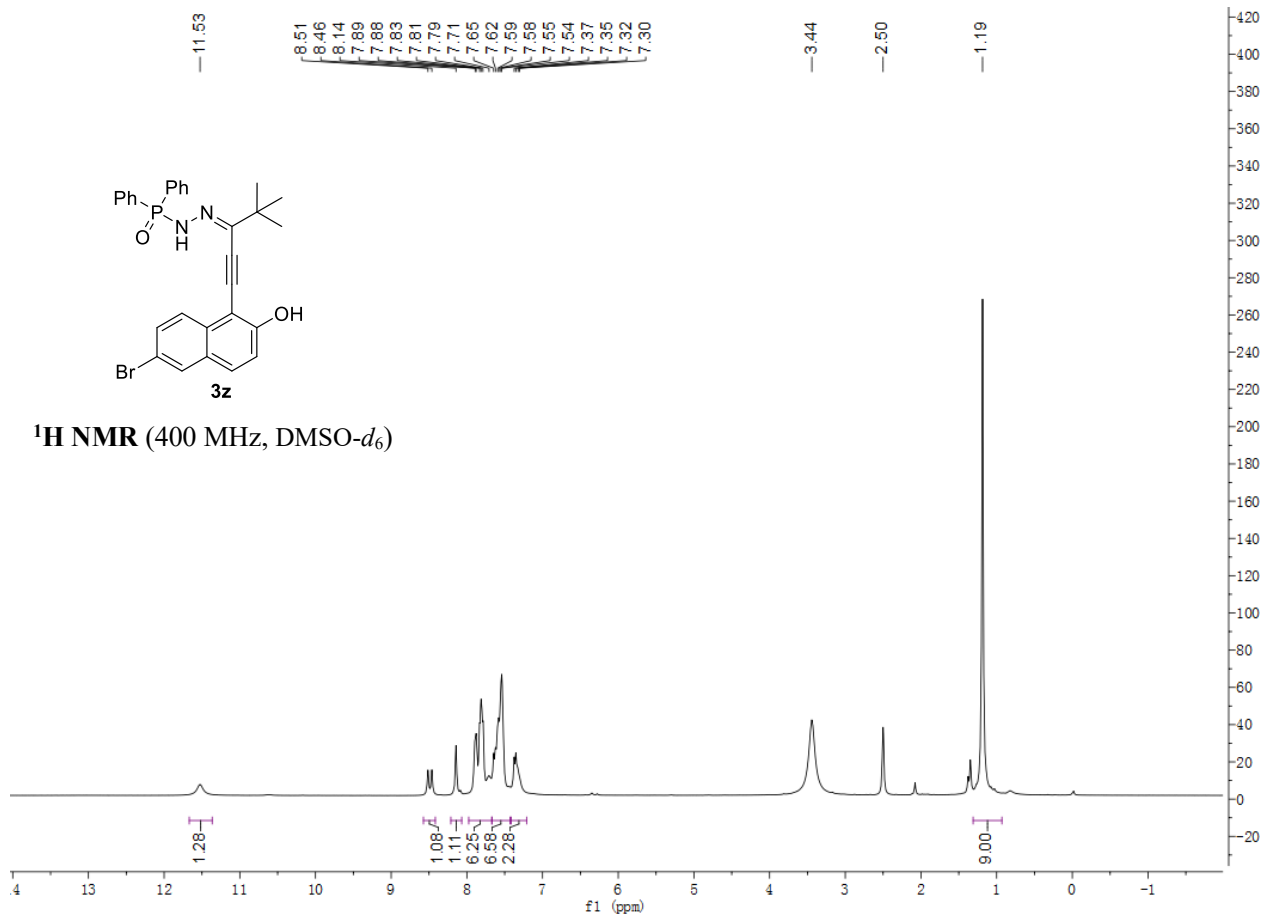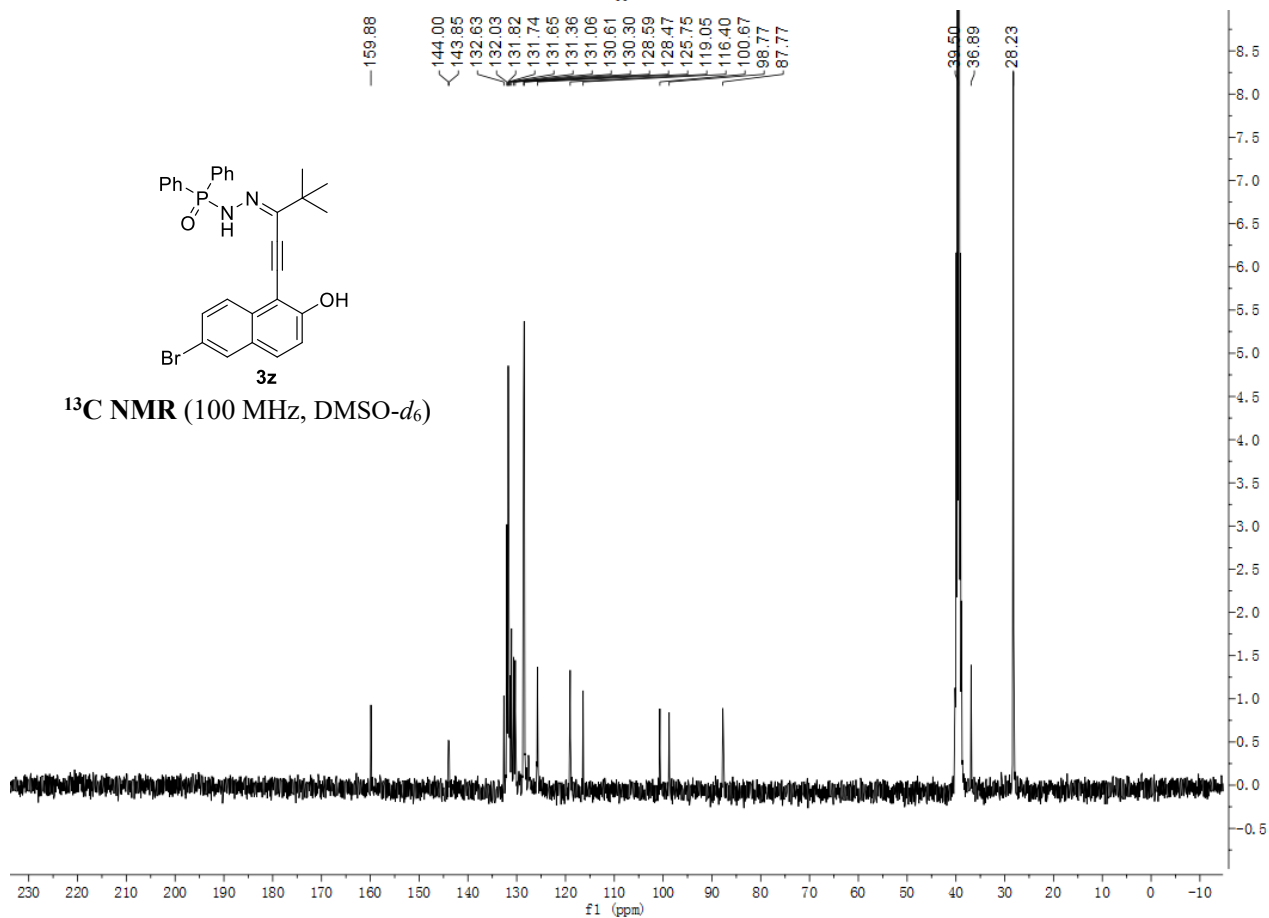

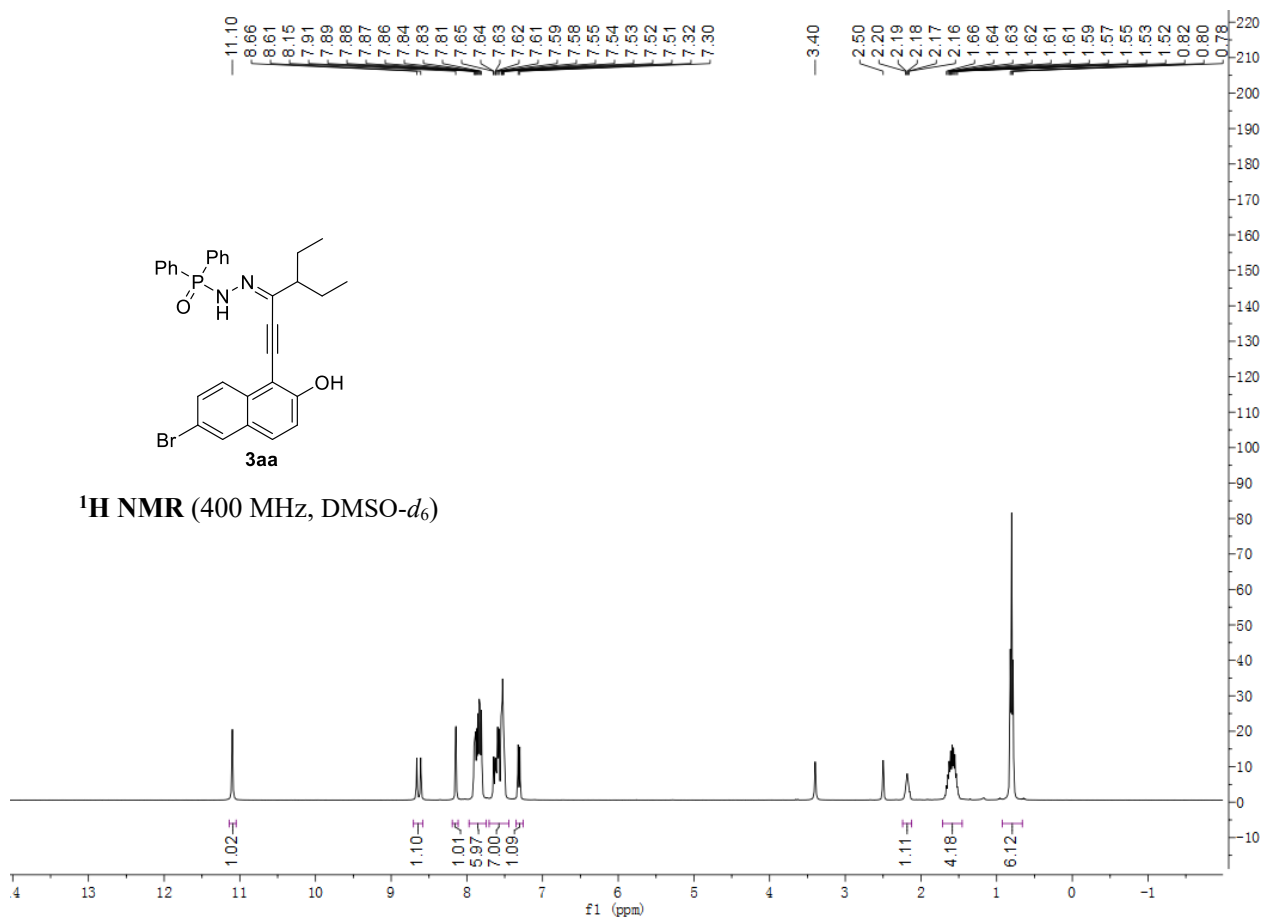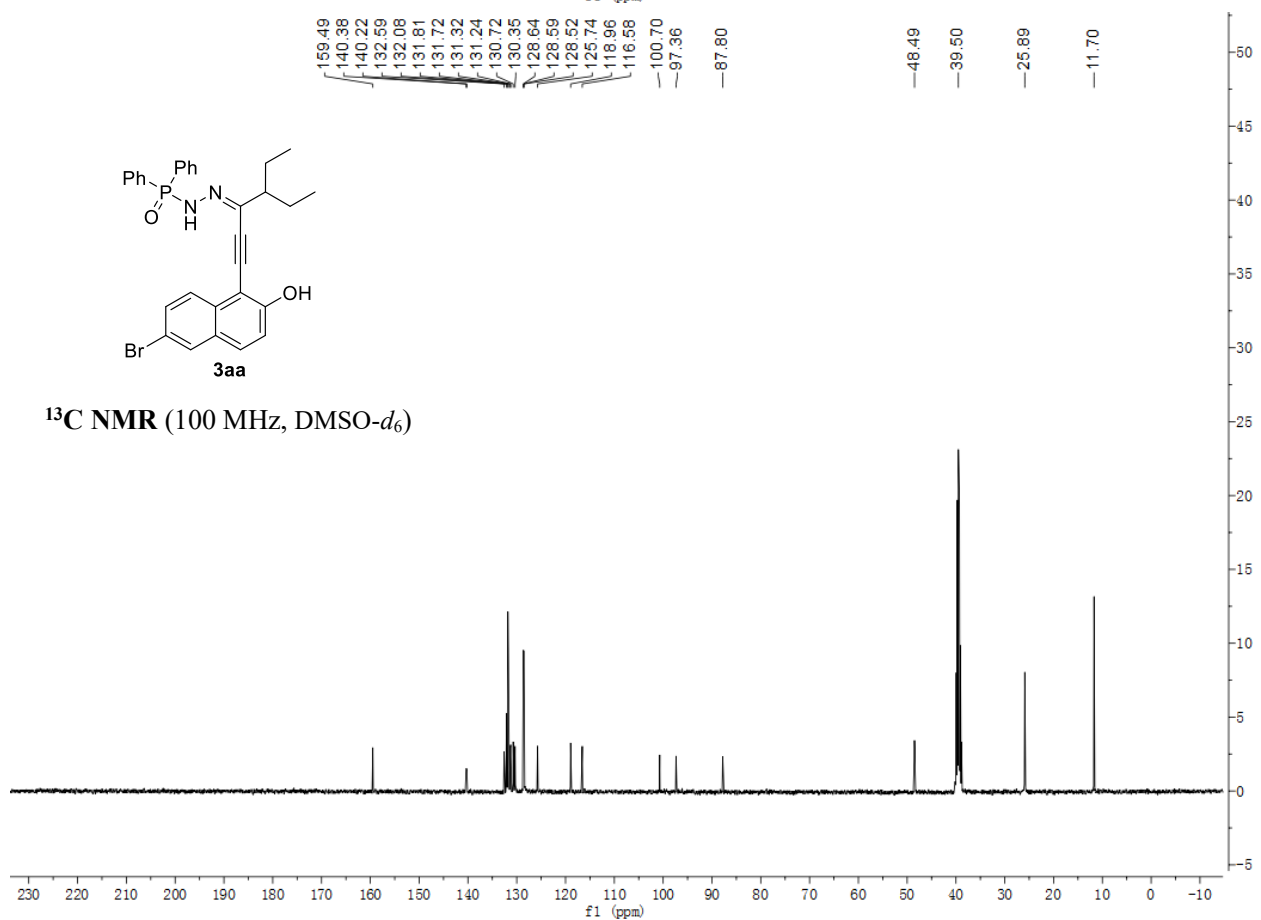

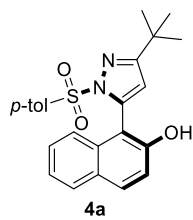

**<sup>1</sup>H NMR (400 MHz, CDCl<sub>3</sub>)**

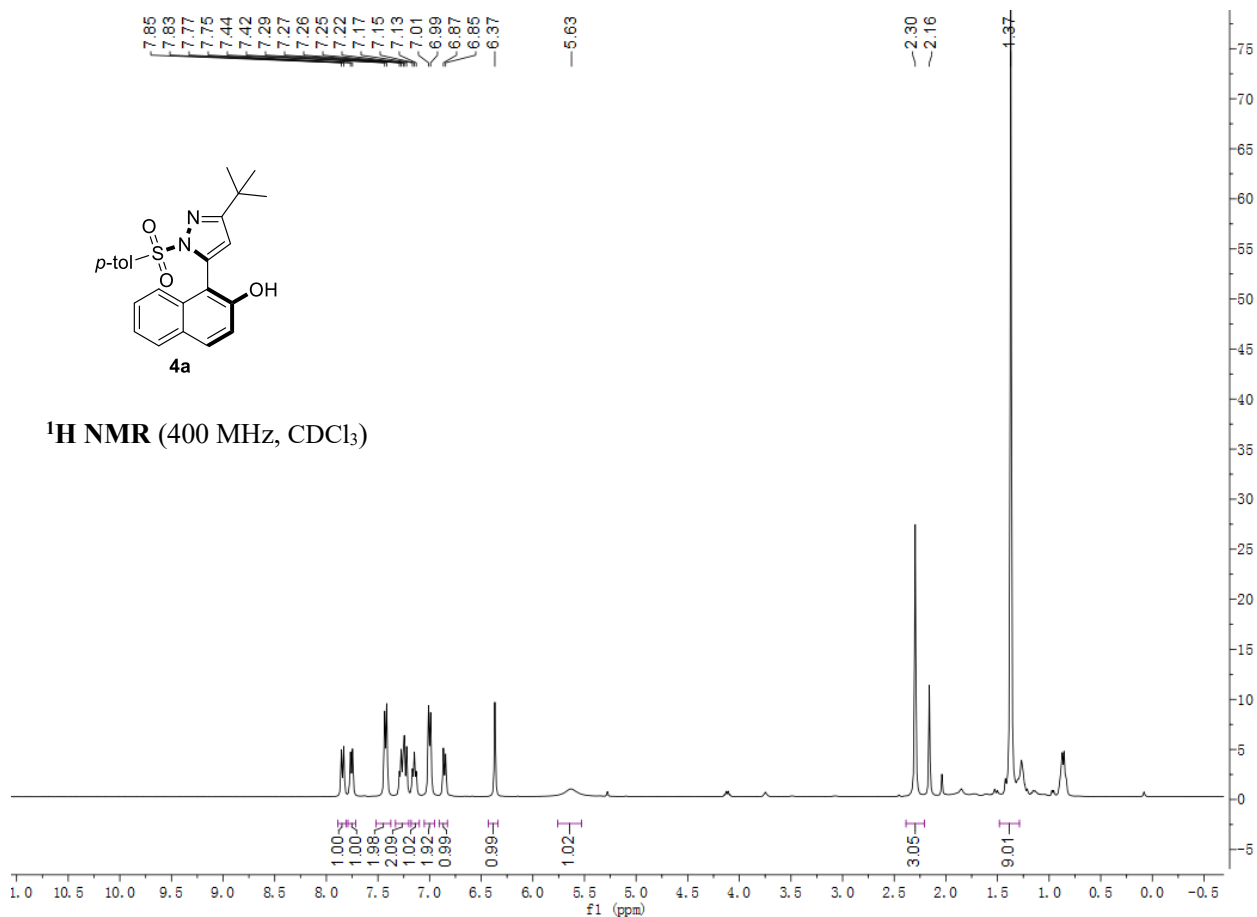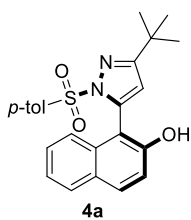

**<sup>13</sup>C NMR (100 MHz, CDCl<sub>3</sub>)**

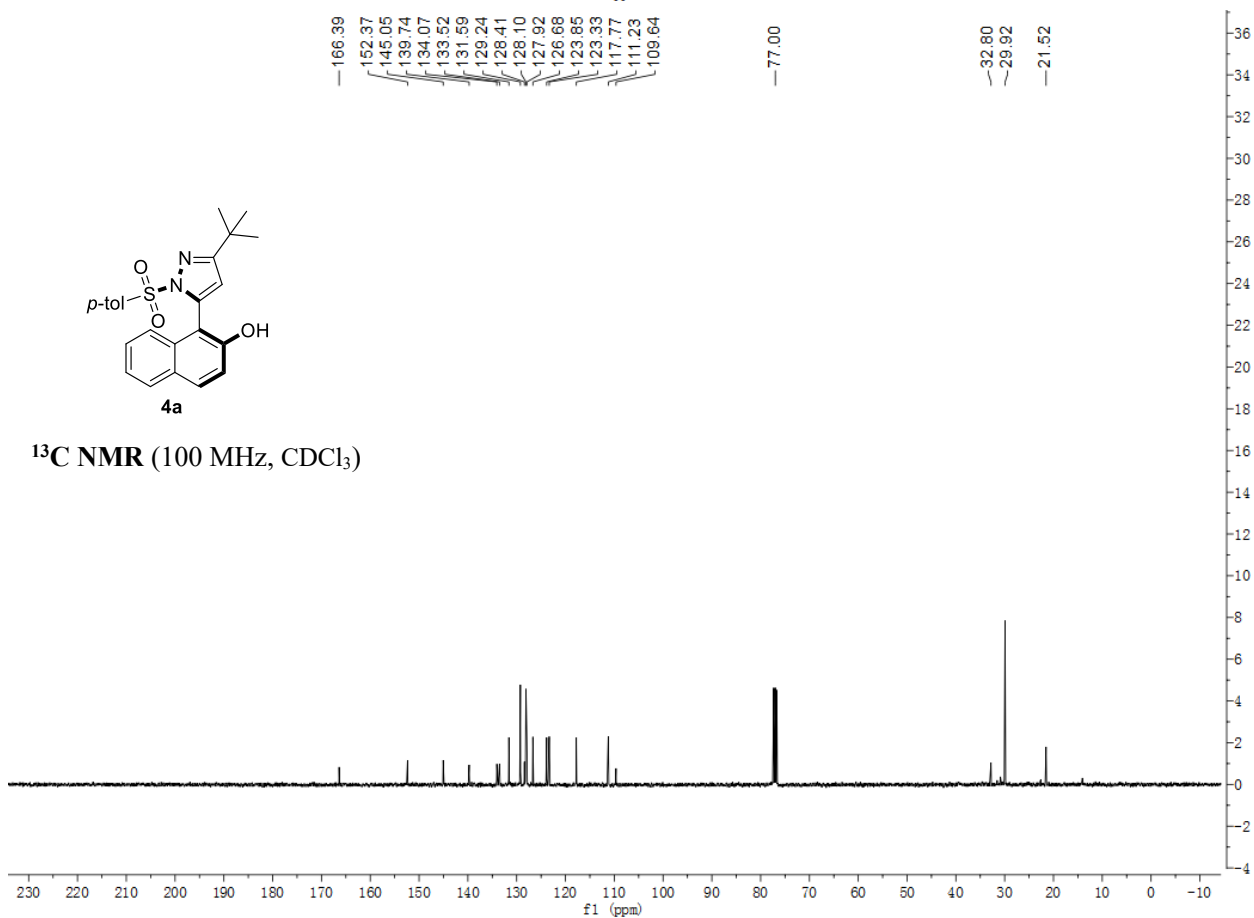

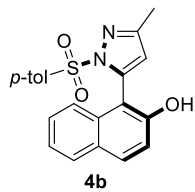

$^1\text{H NMR}$  (400 MHz,  $\text{CDCl}_3$ )

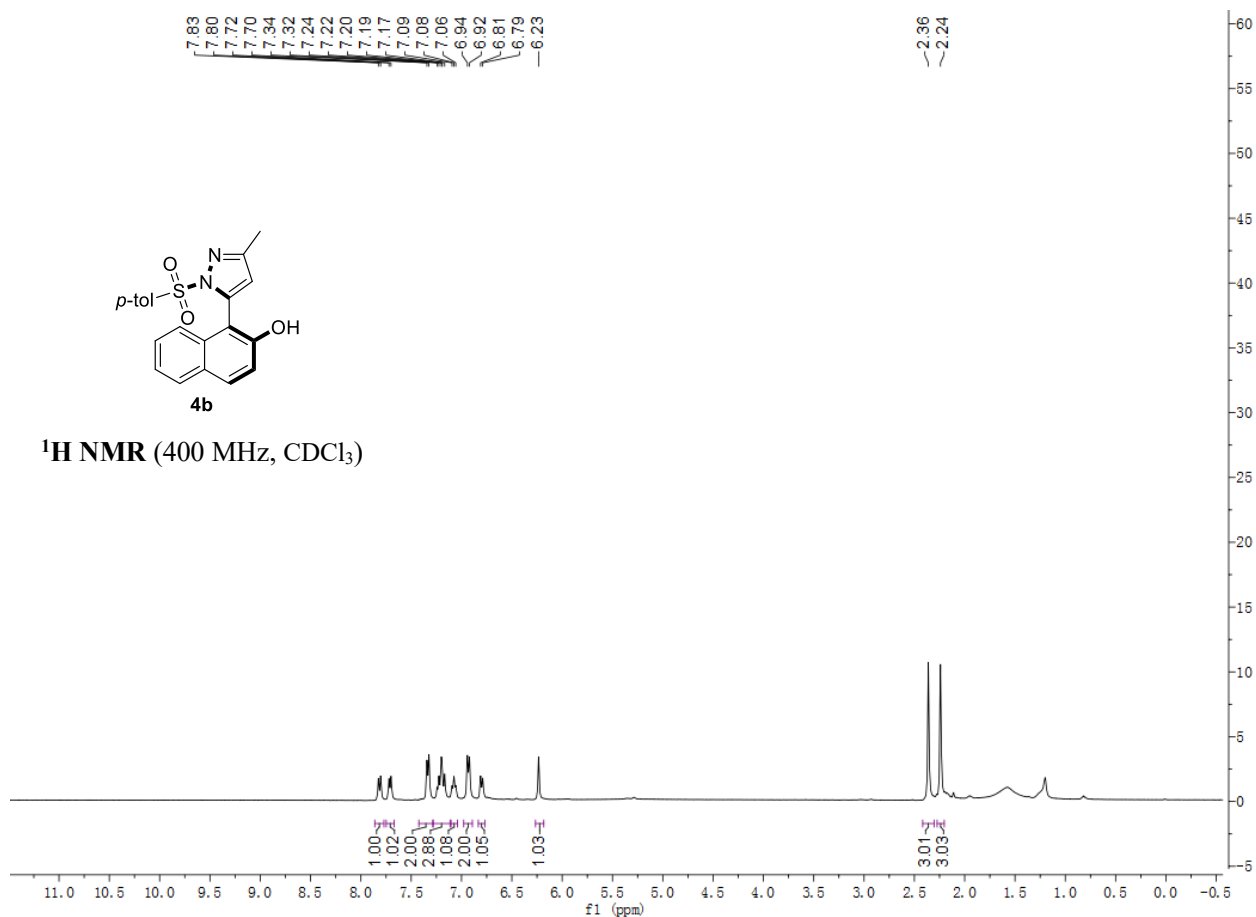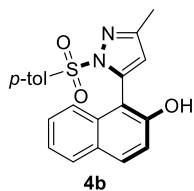

$^{13}\text{C NMR}$  (100 MHz,  $\text{CDCl}_3$ )

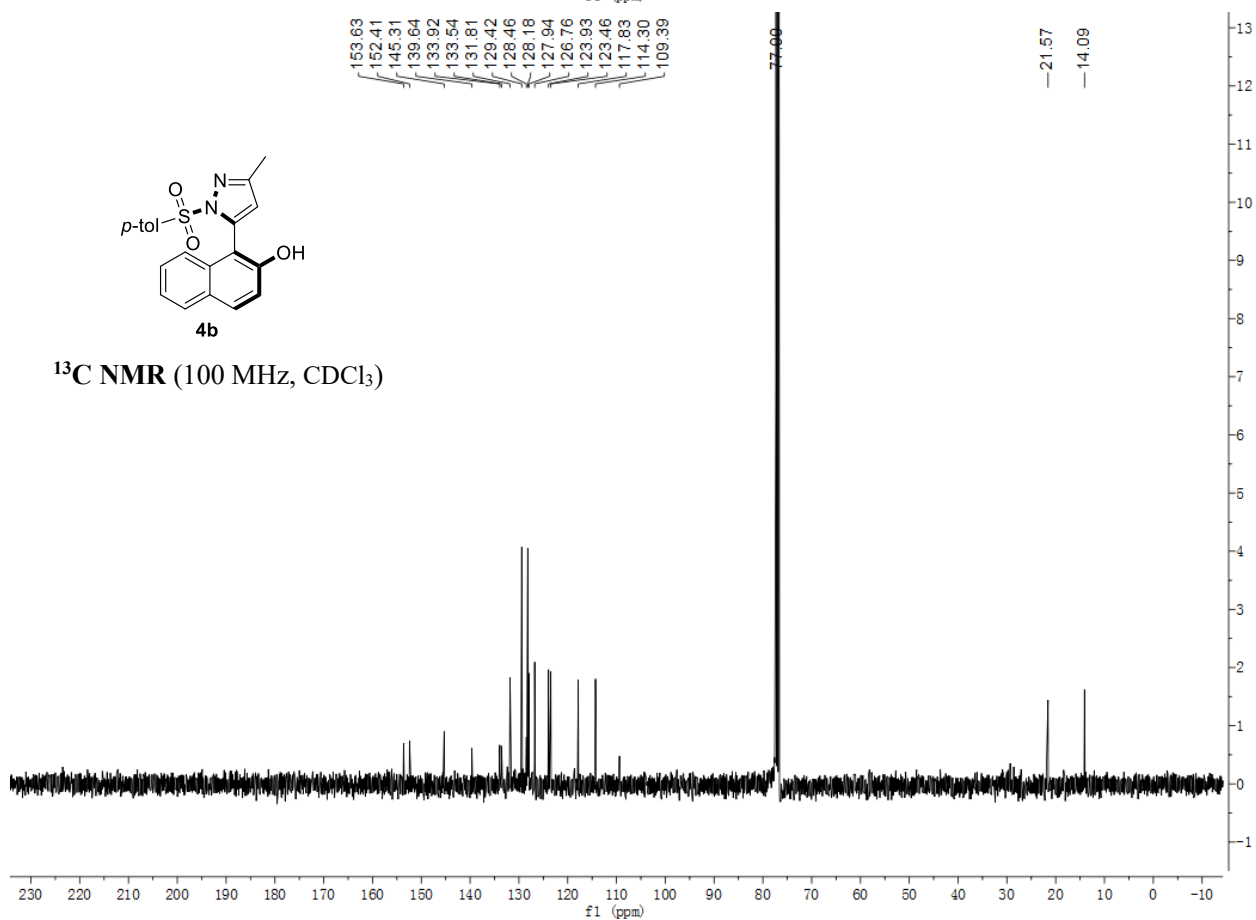

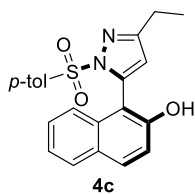

**<sup>1</sup>H NMR (400 MHz, CDCl<sub>3</sub>)**

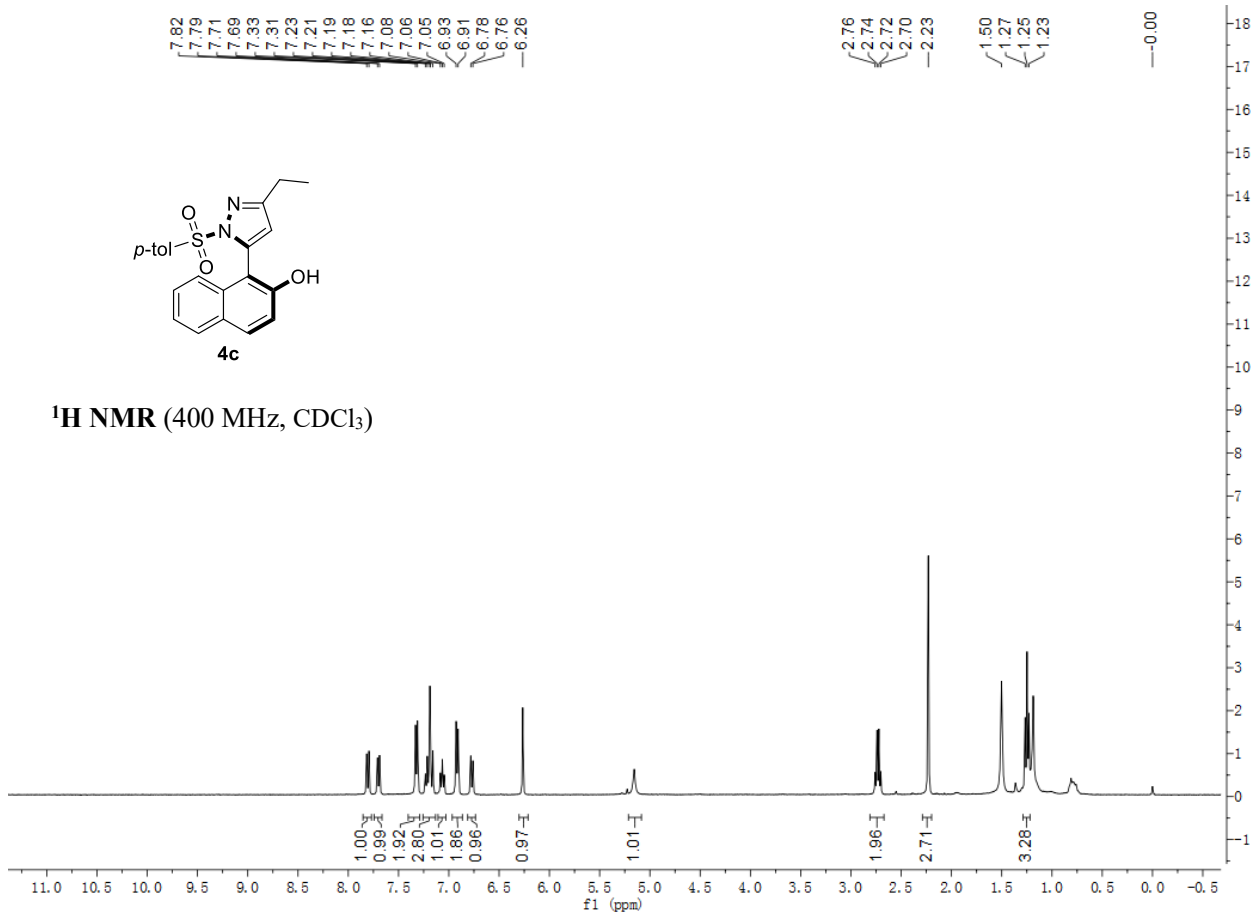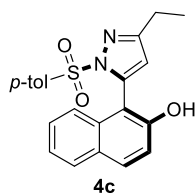

**<sup>13</sup>C NMR (100 MHz, CDCl<sub>3</sub>)**

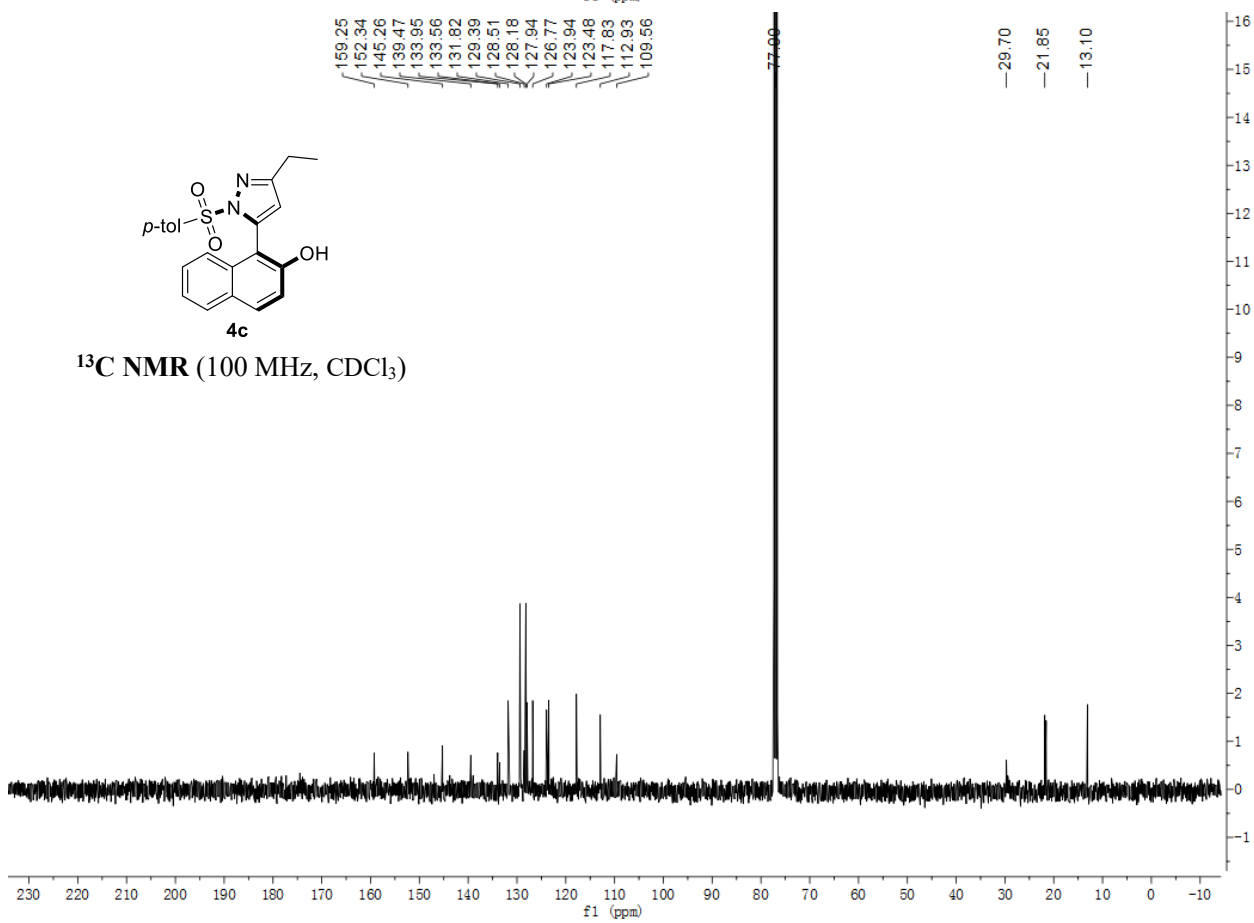

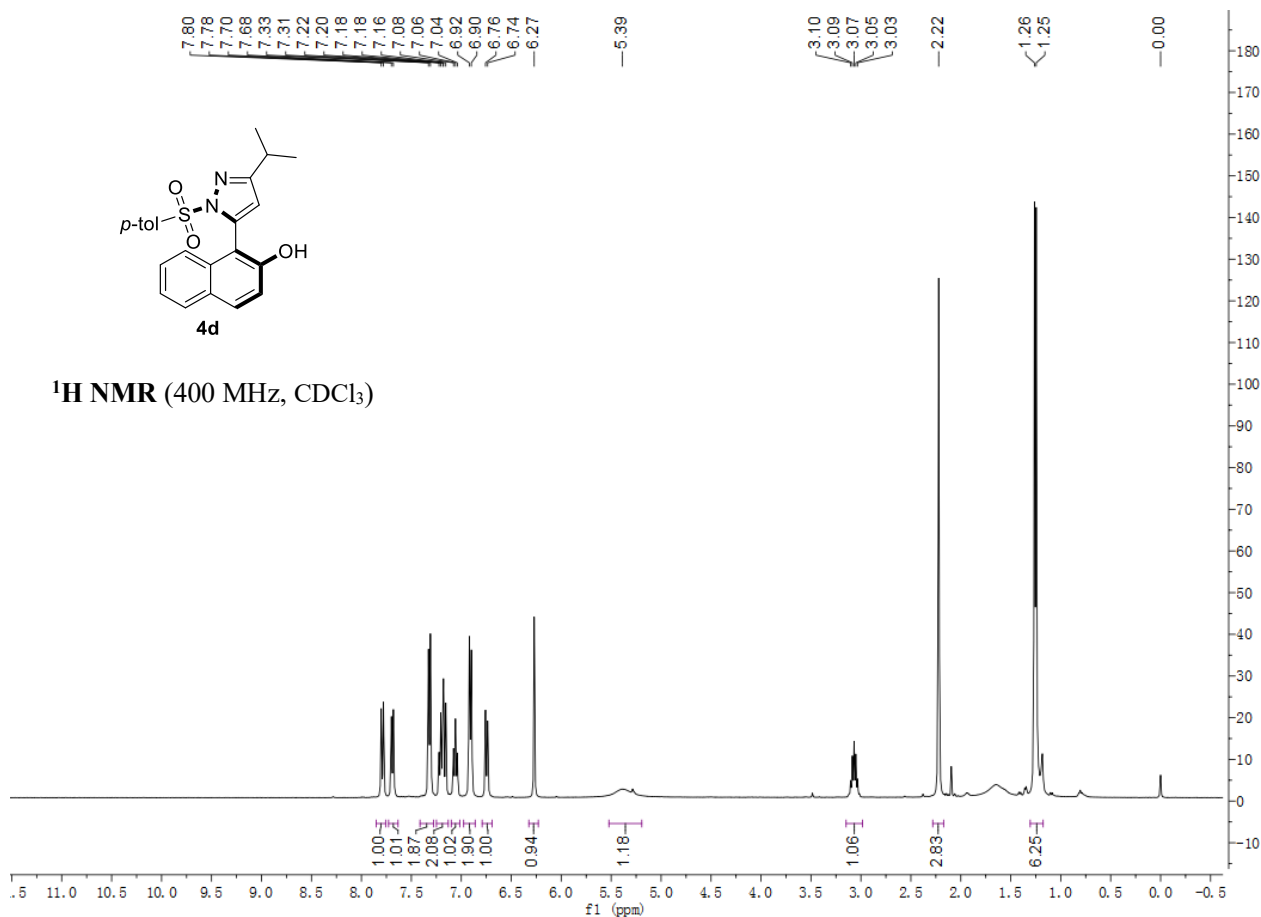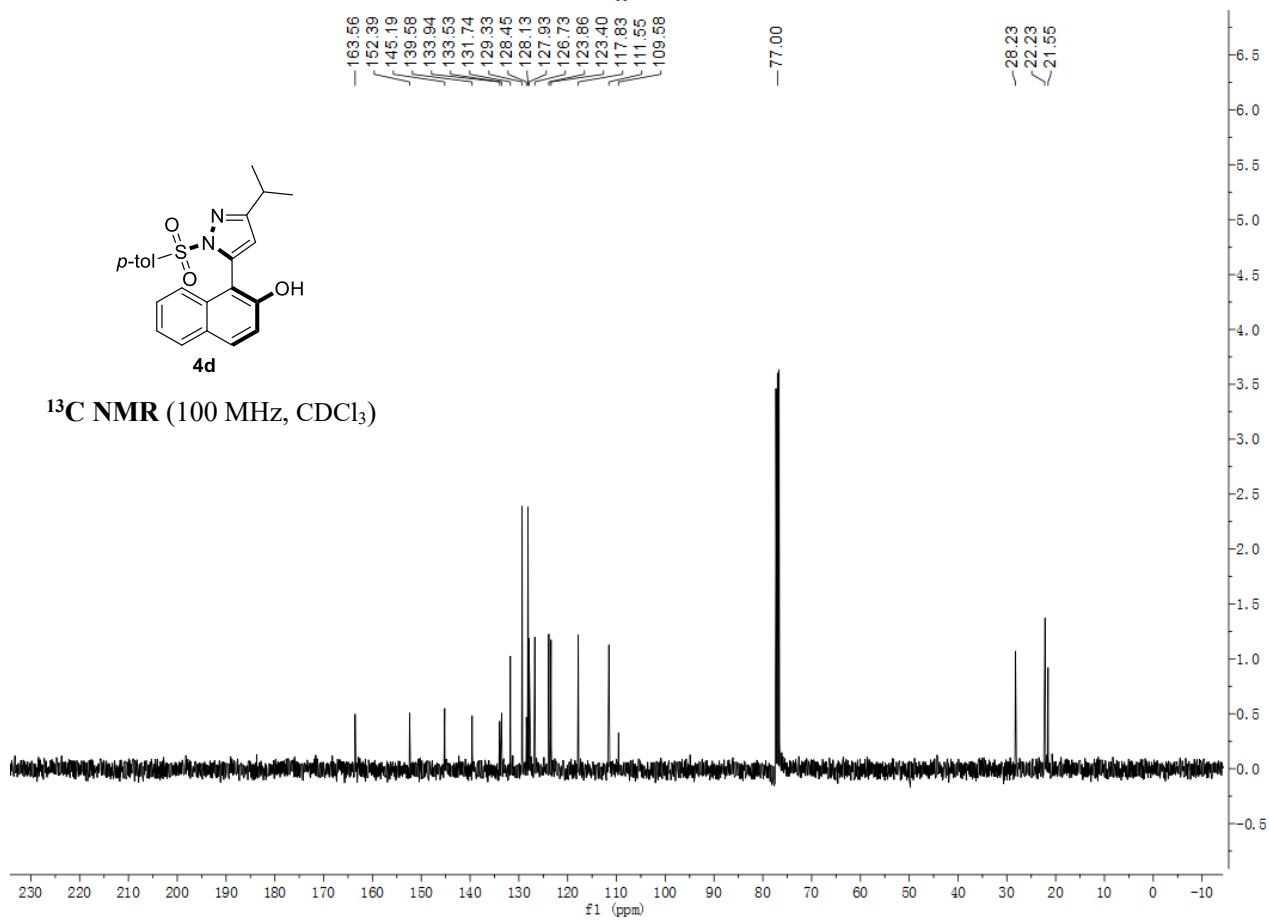

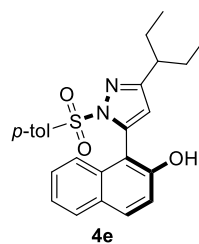

**<sup>1</sup>H NMR (400 MHz, CDCl<sub>3</sub>)**

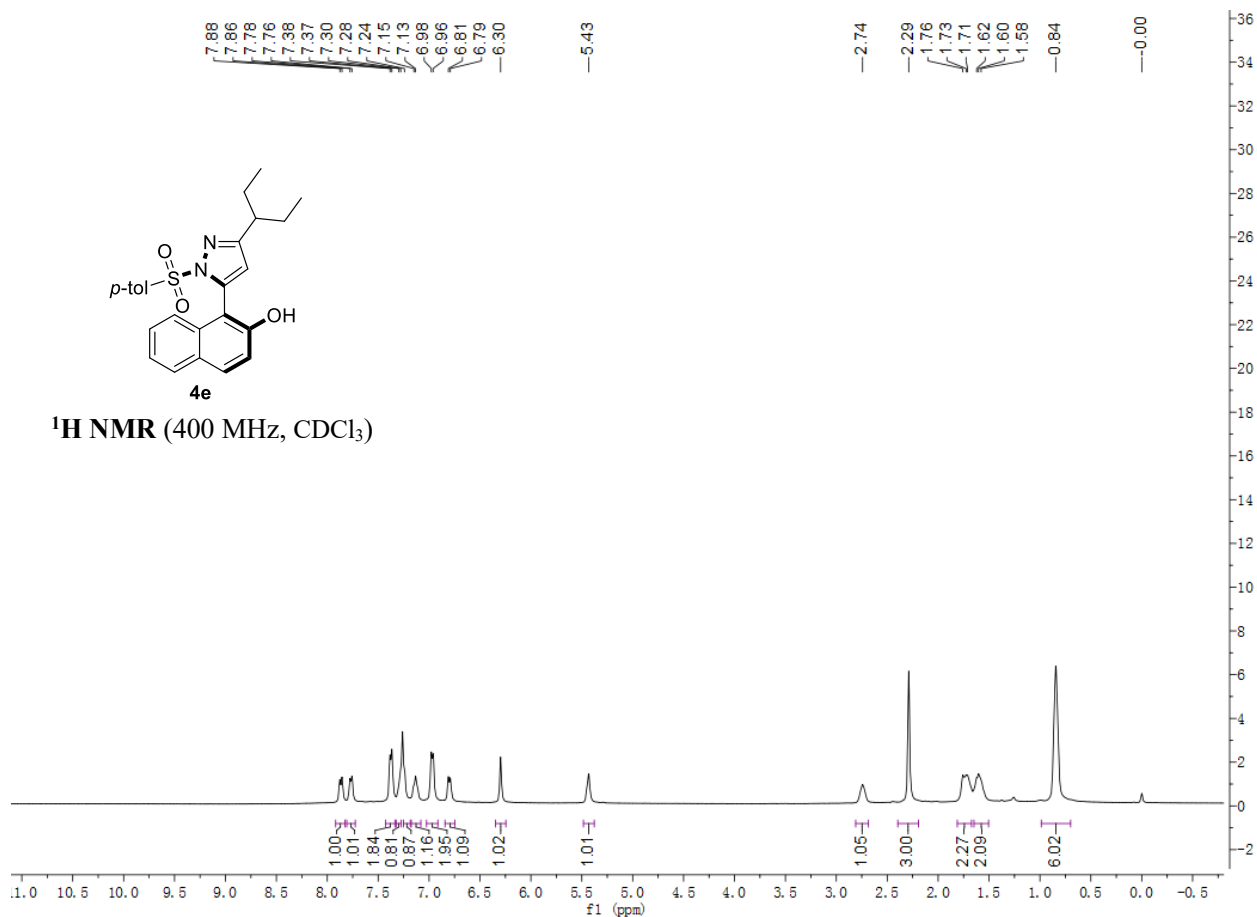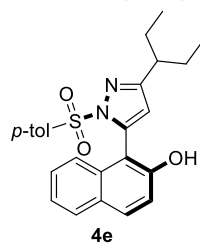

**<sup>13</sup>C NMR (100 MHz, CDCl<sub>3</sub>)**

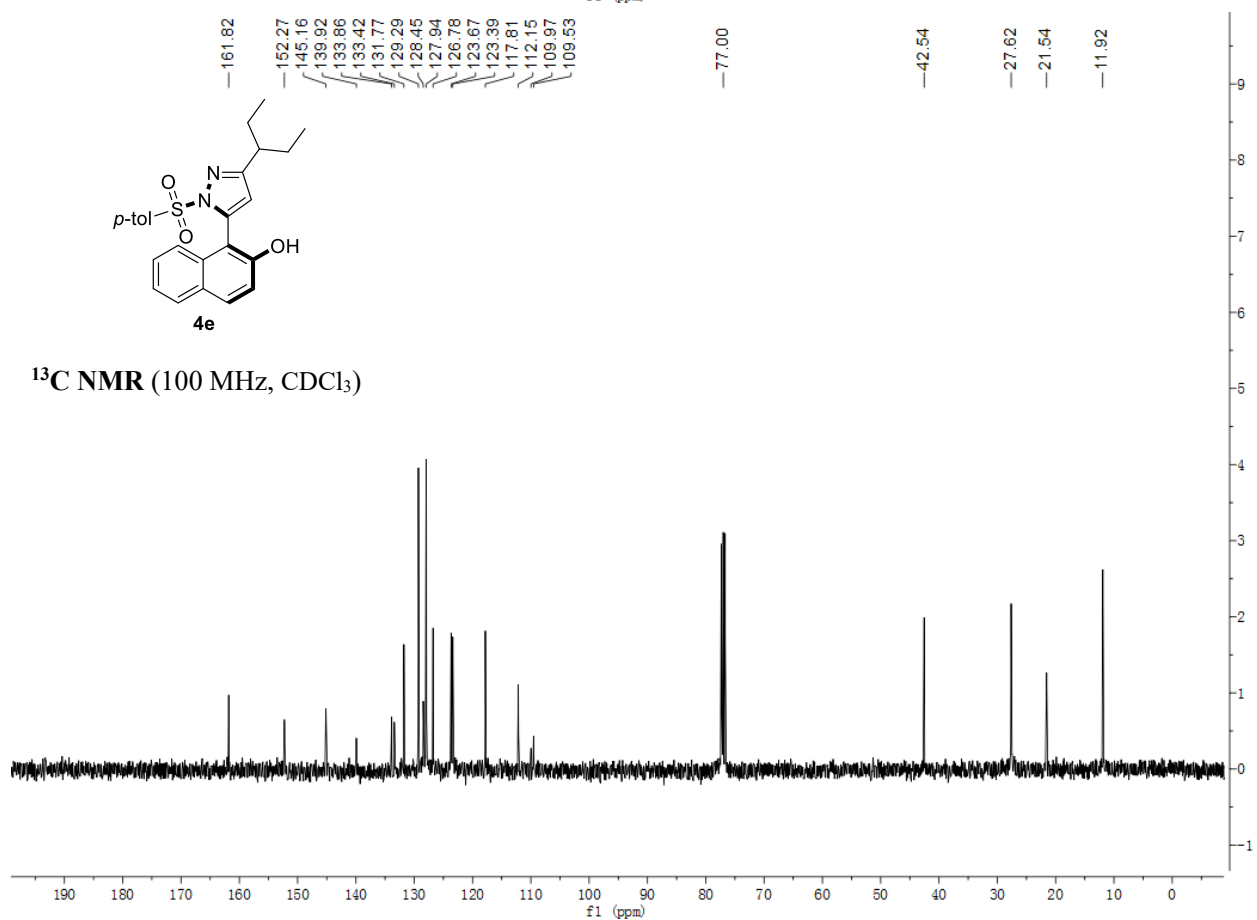



7.80  
7.78  
7.76  
7.70  
7.68  
7.41  
7.33  
7.31  
7.24  
7.22  
7.21  
7.19  
7.18  
7.16  
7.08  
7.06  
7.04  
6.92  
6.90  
6.77  
6.75  
— 5.42  
3.21  
3.19  
3.17  
3.16  
3.15  
3.13  
2.23  
2.17  
2.15  
2.10  
2.07  
2.06  
2.04  
1.74  
1.70  
1.69  
1.68  
1.65  
1.64  
1.62  
1.60  
1.56  
0.00

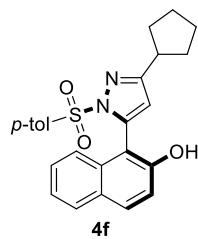

<sup>1</sup>H NMR (400 MHz, CDCl<sub>3</sub>)

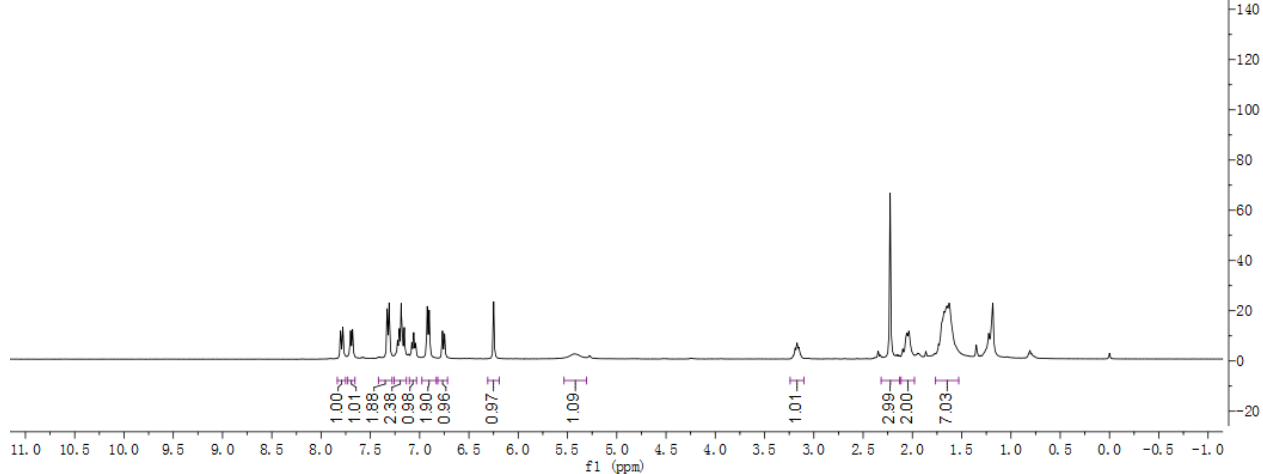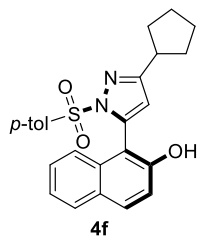

<sup>13</sup>C NMR (100 MHz, CDCl<sub>3</sub>)

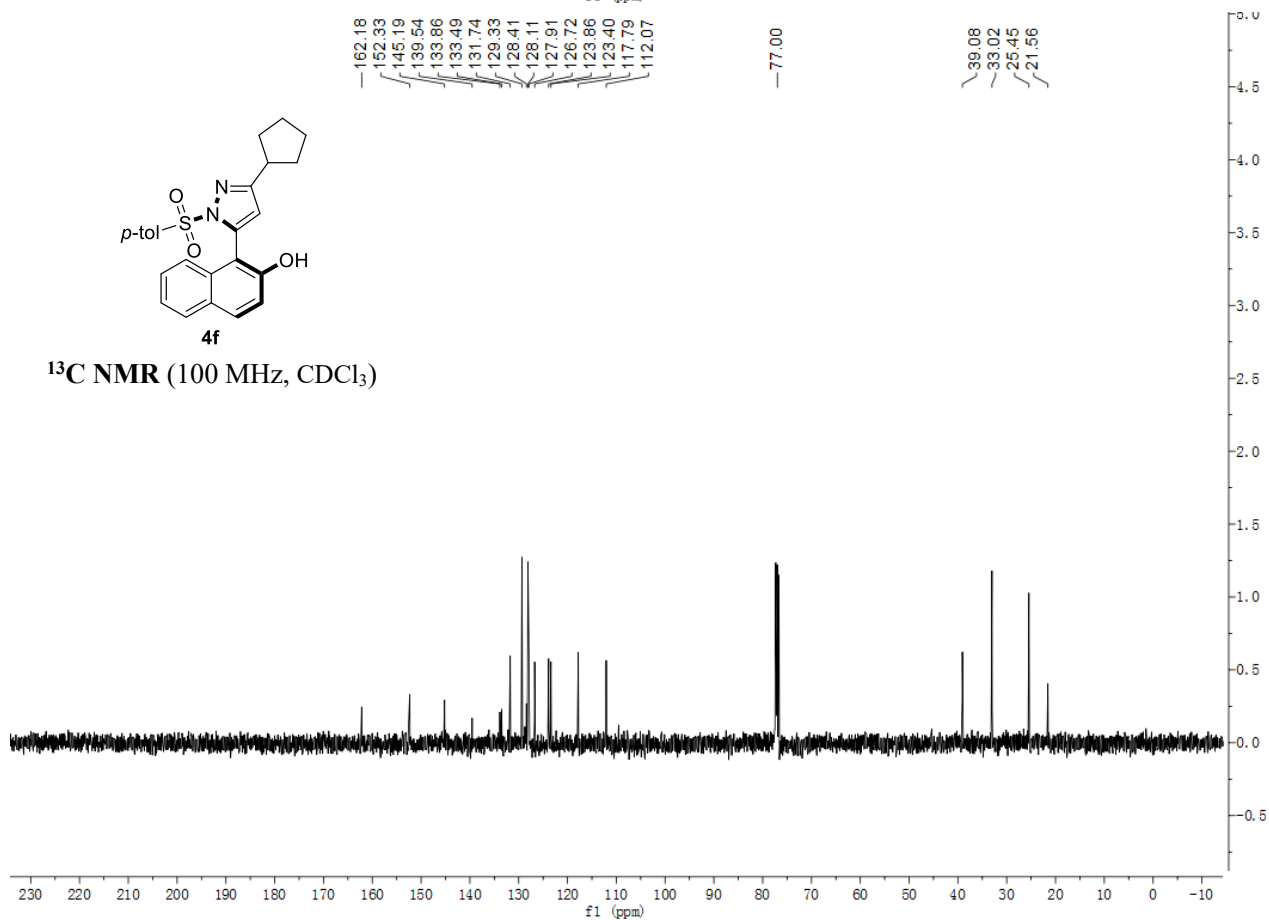

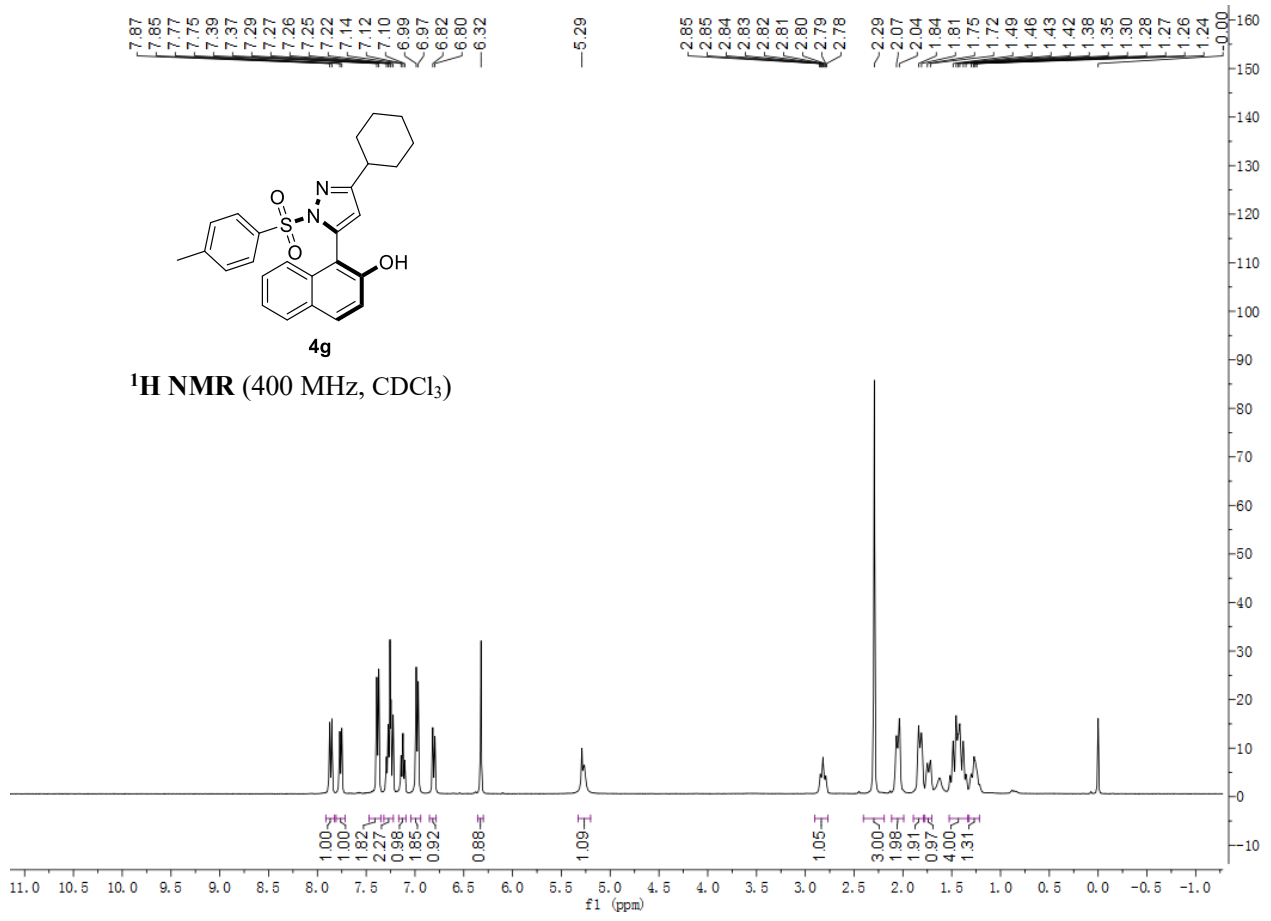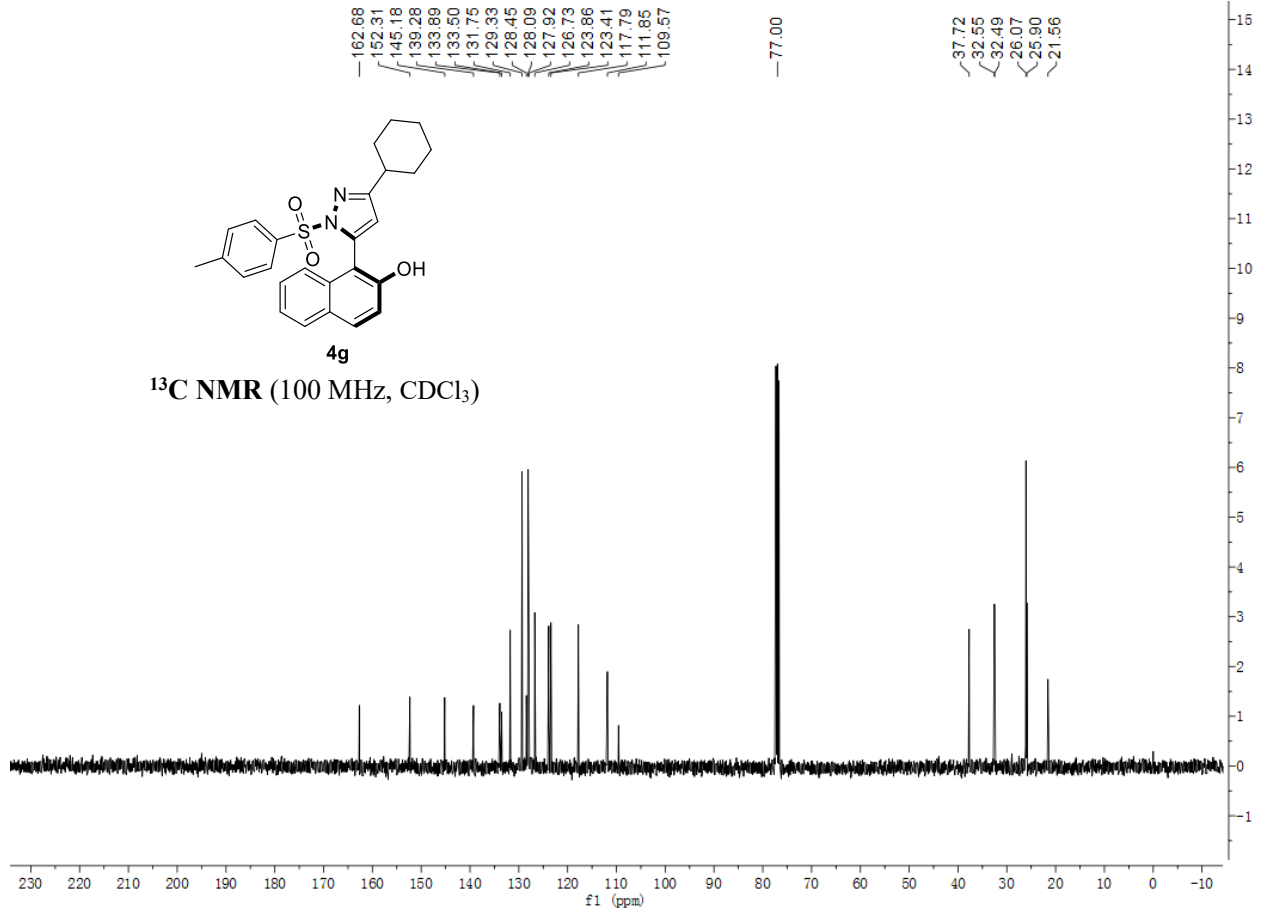

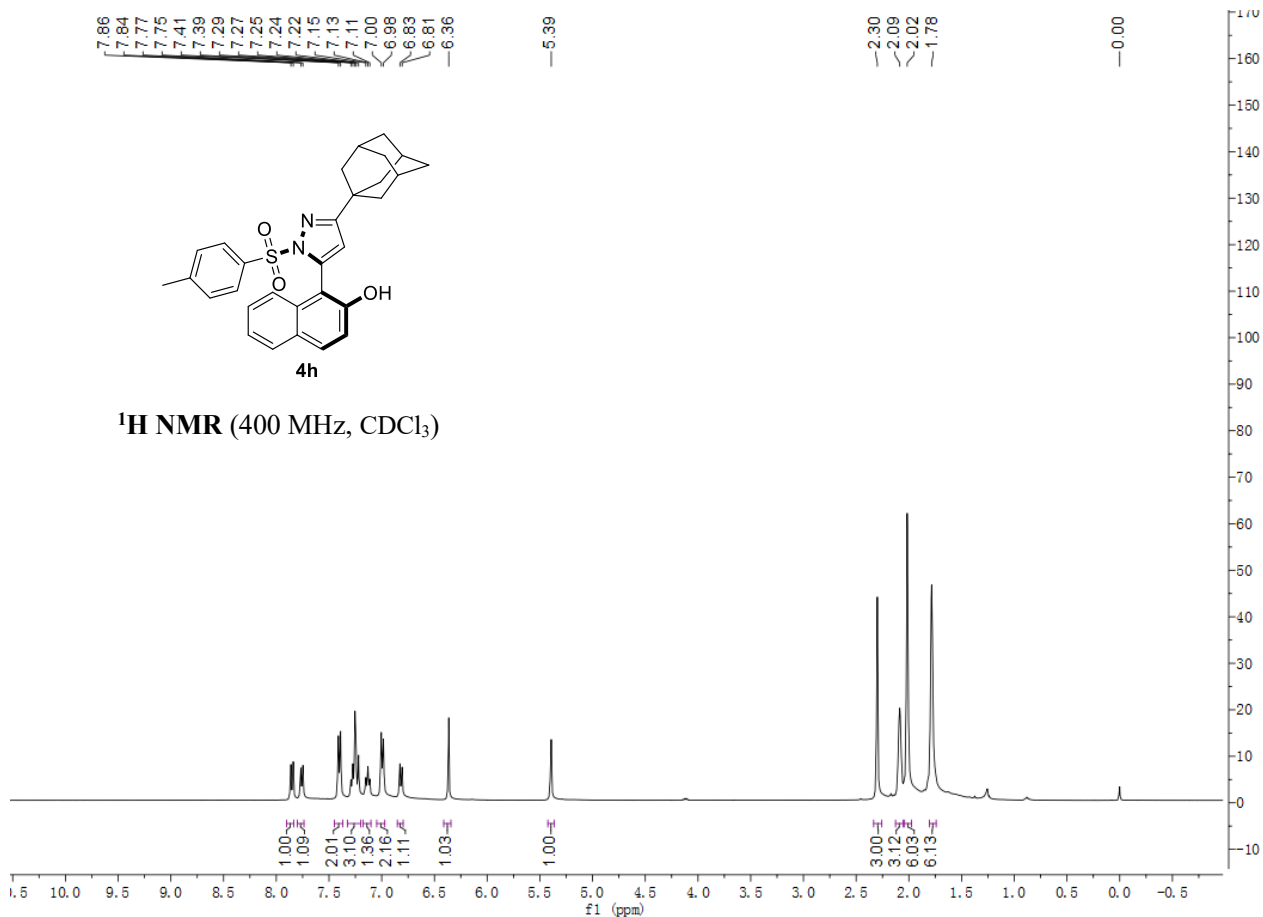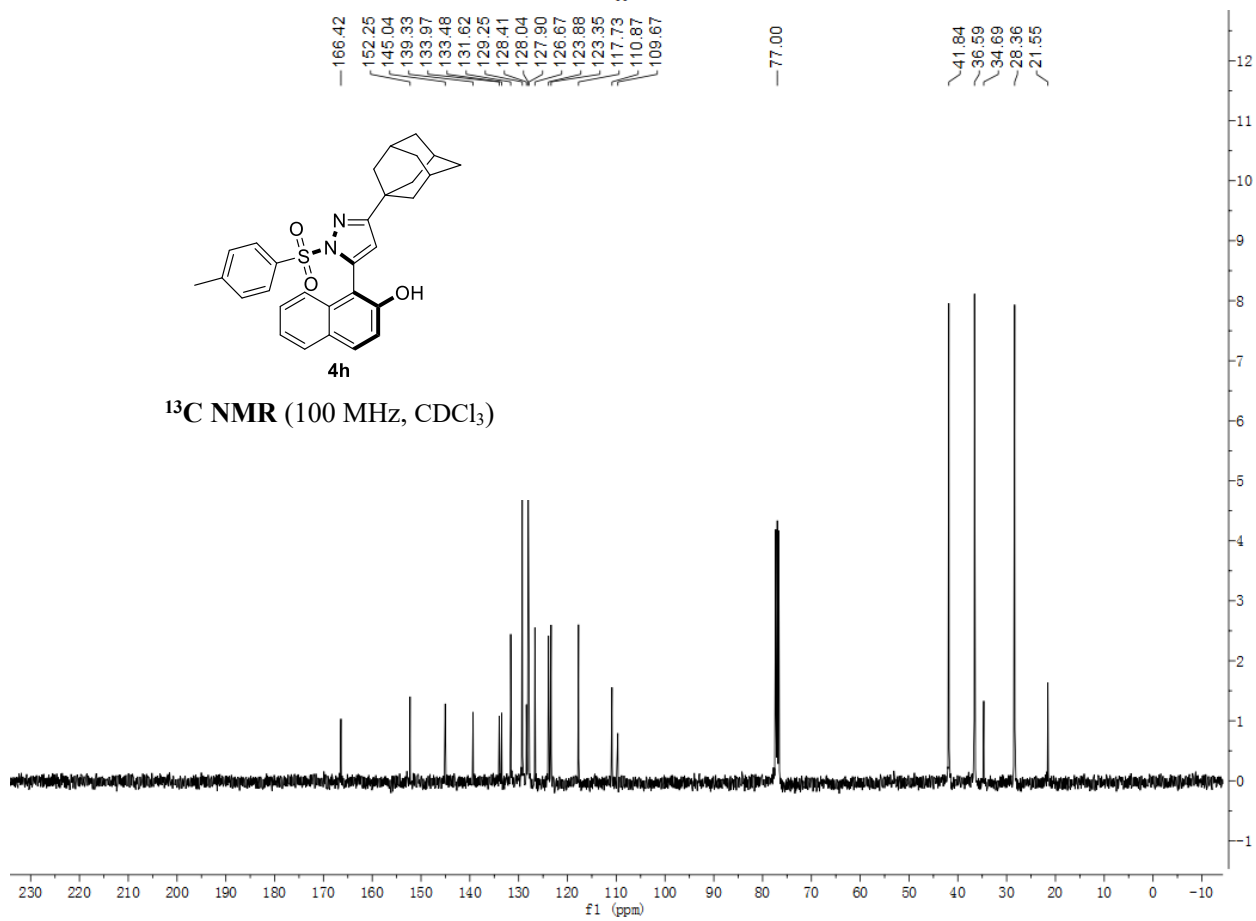

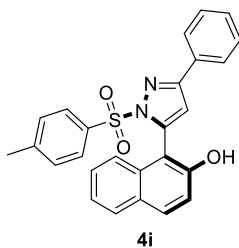

<sup>1</sup>H NMR (400 MHz, acetone-d<sub>6</sub>)

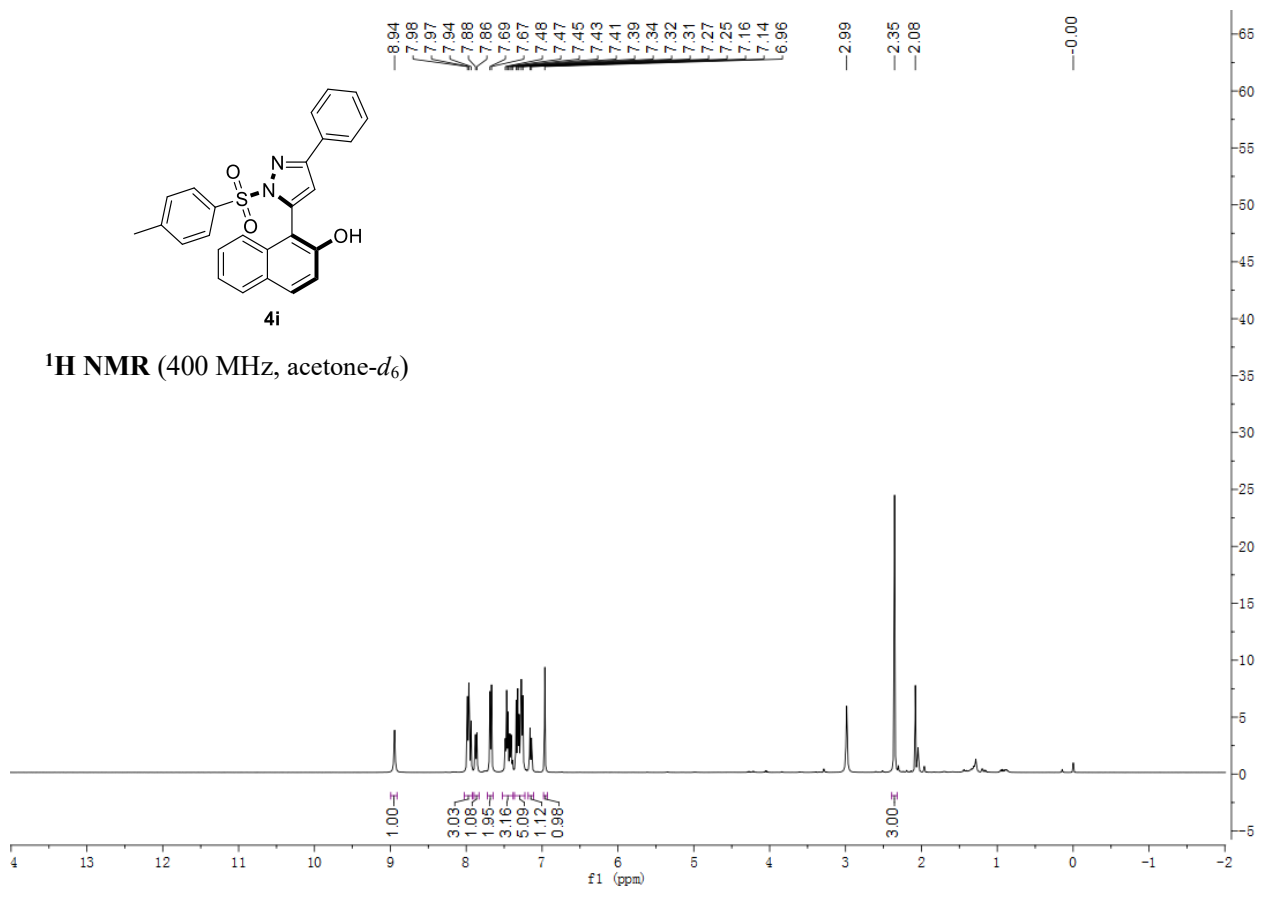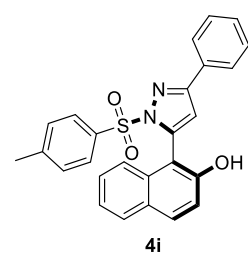

<sup>13</sup>C NMR (100 MHz, acetone-d<sub>6</sub>)

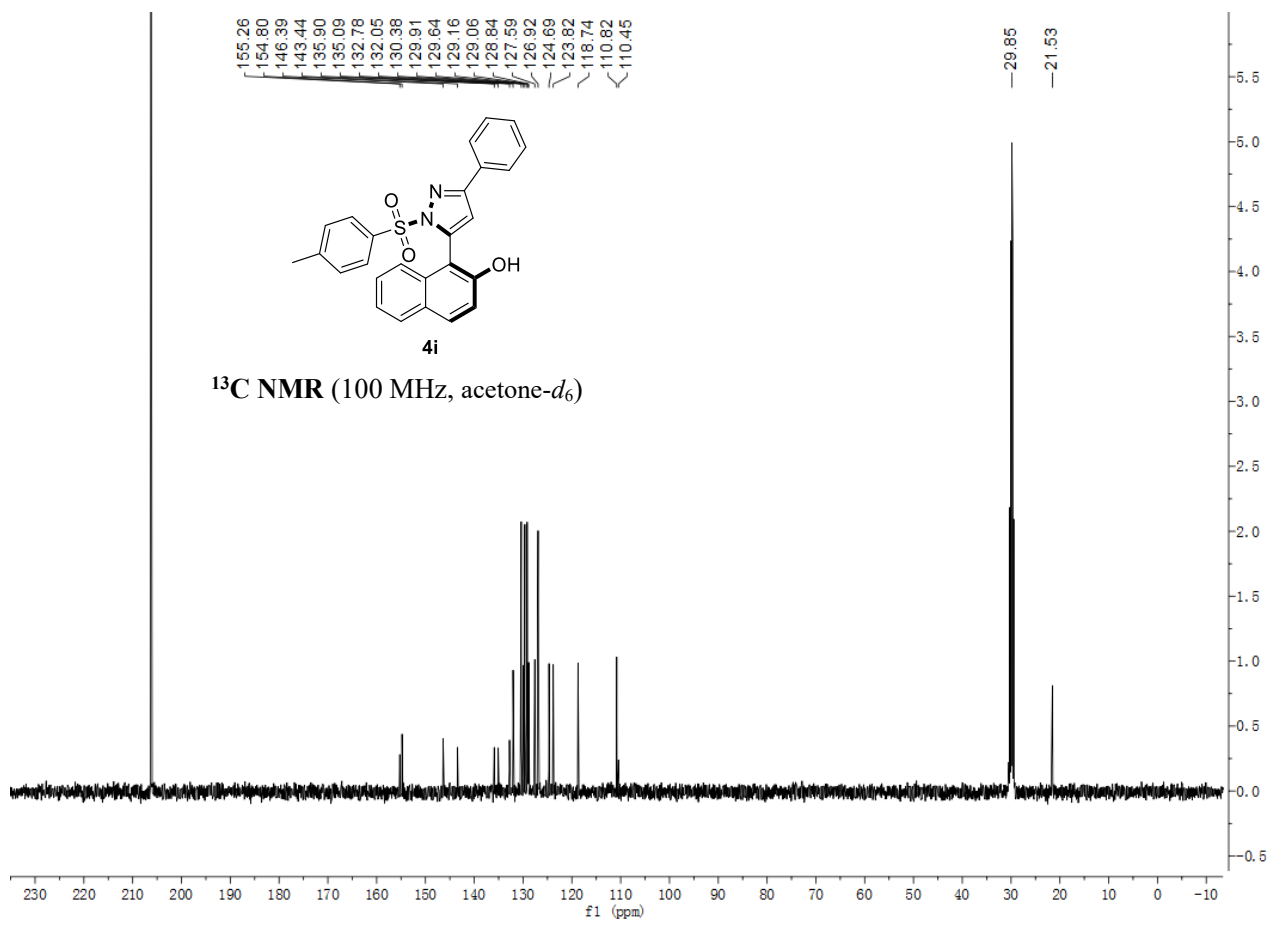

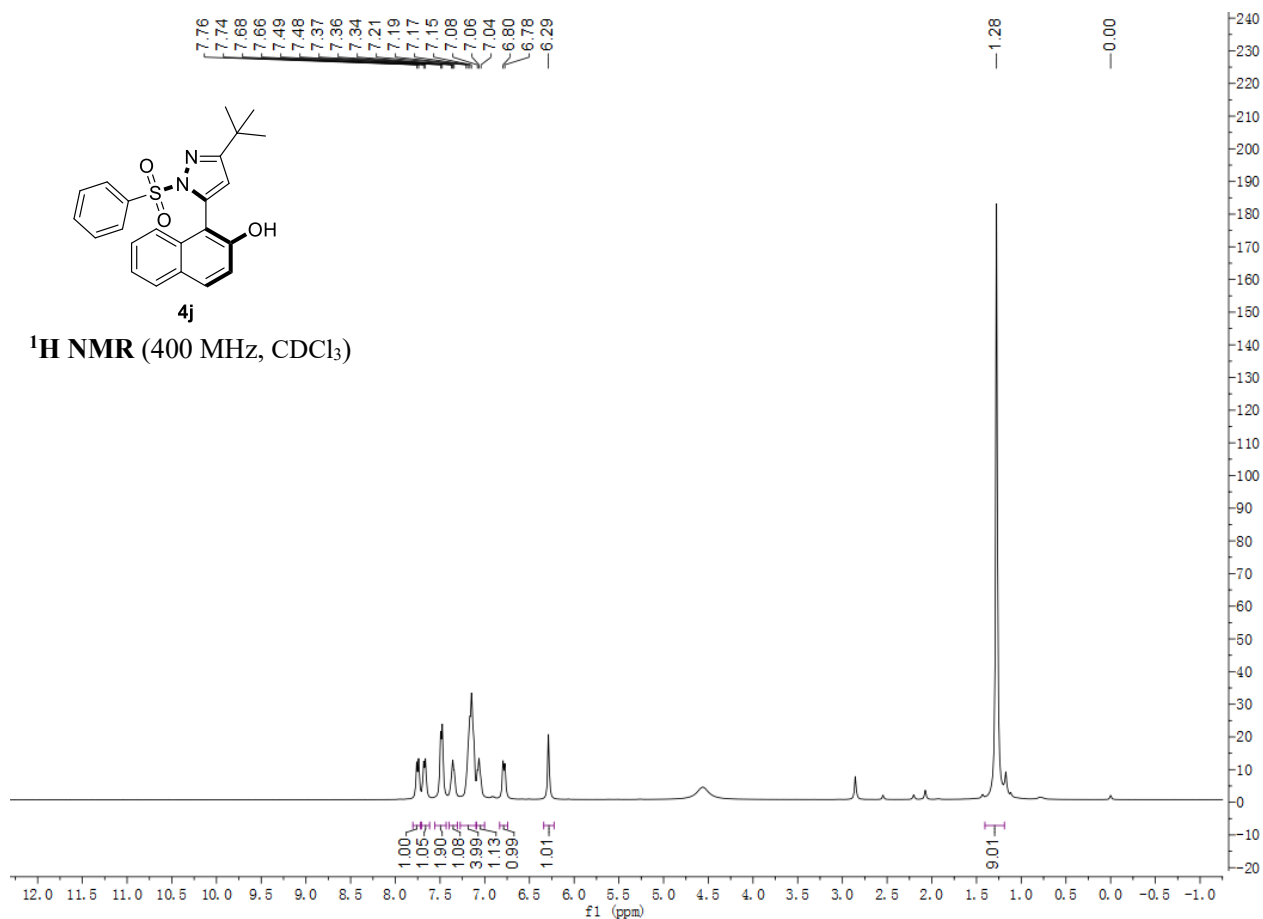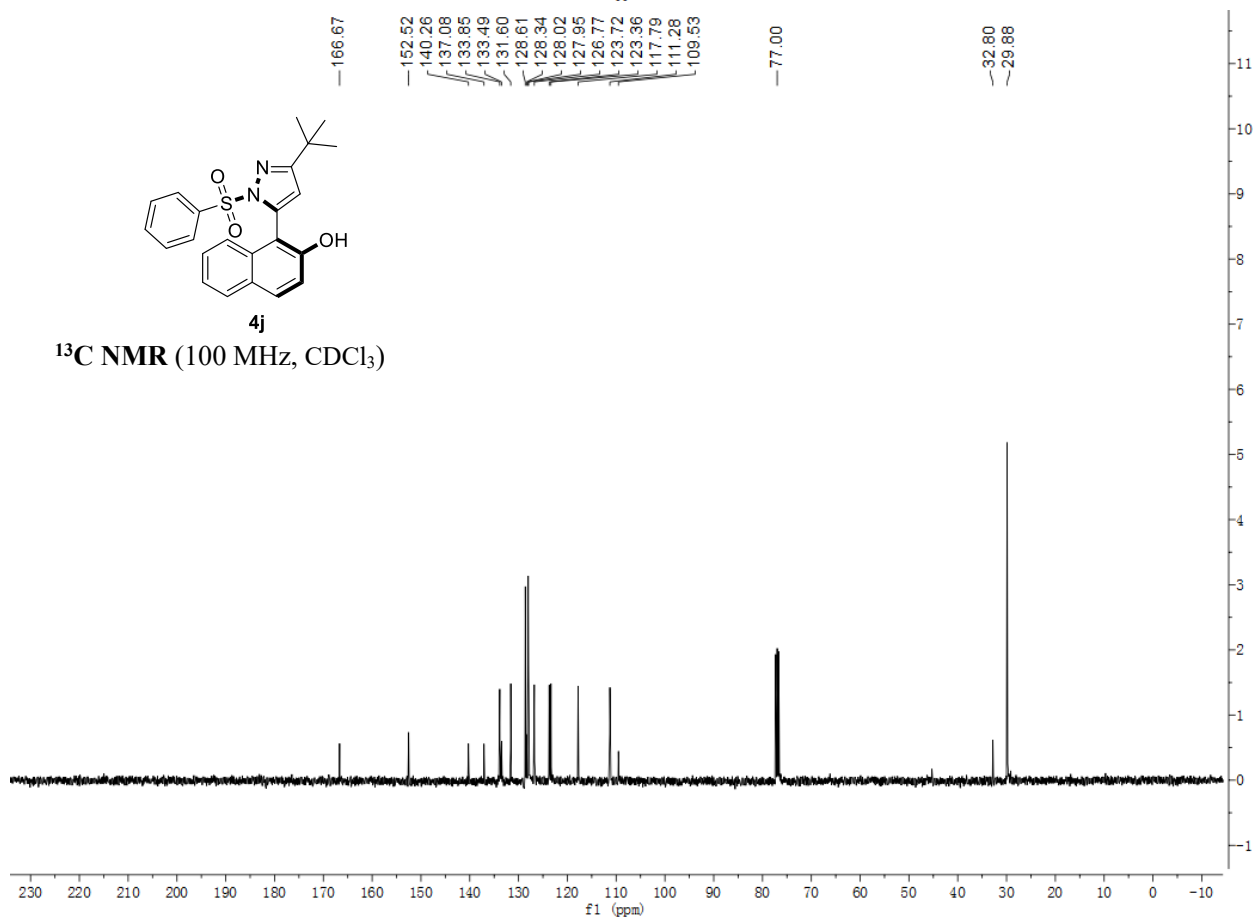

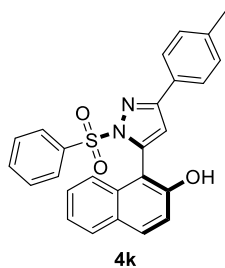

$^1\text{H}$  NMR (400 MHz, acetone- $d_6$ )

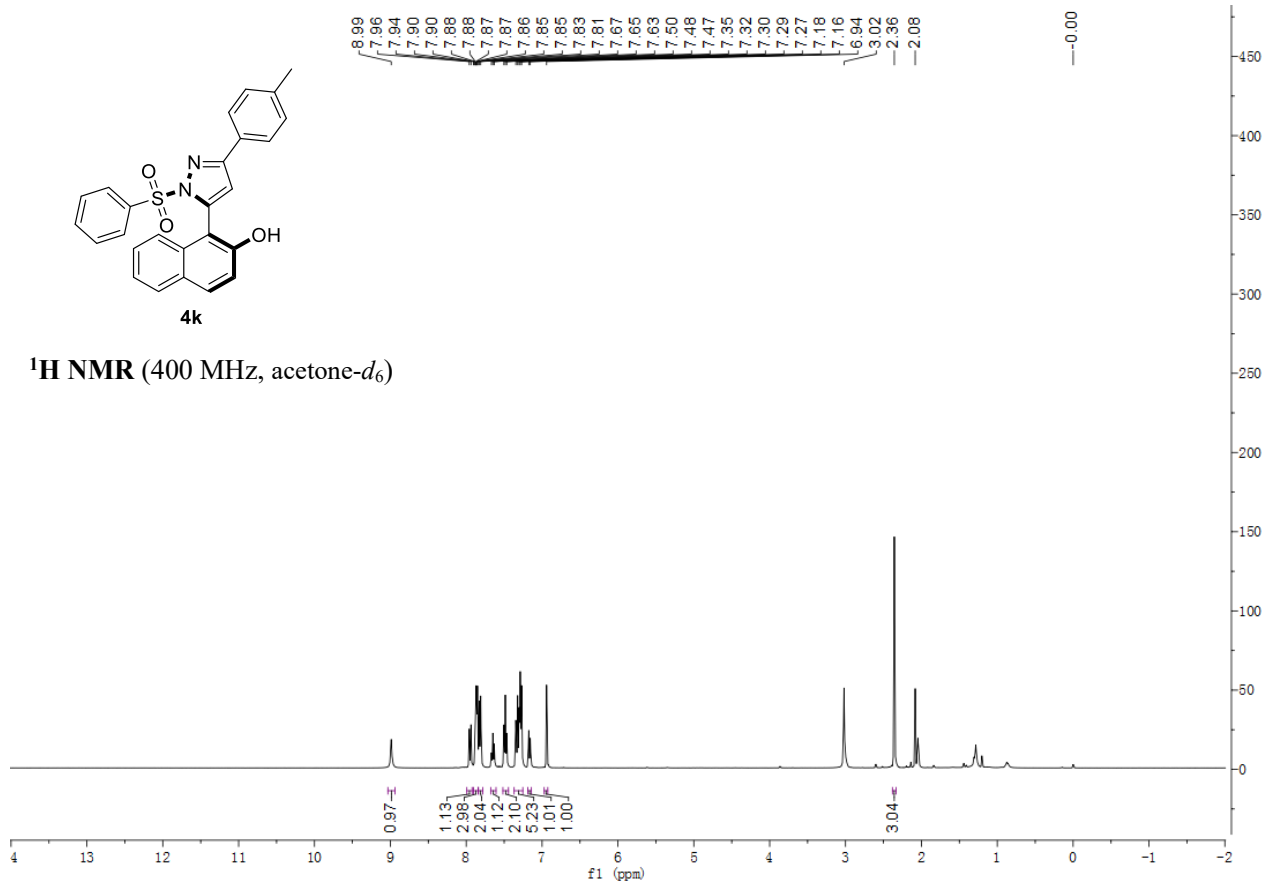

$^{13}\text{C}$  NMR (100 MHz, acetone- $d_6$ )

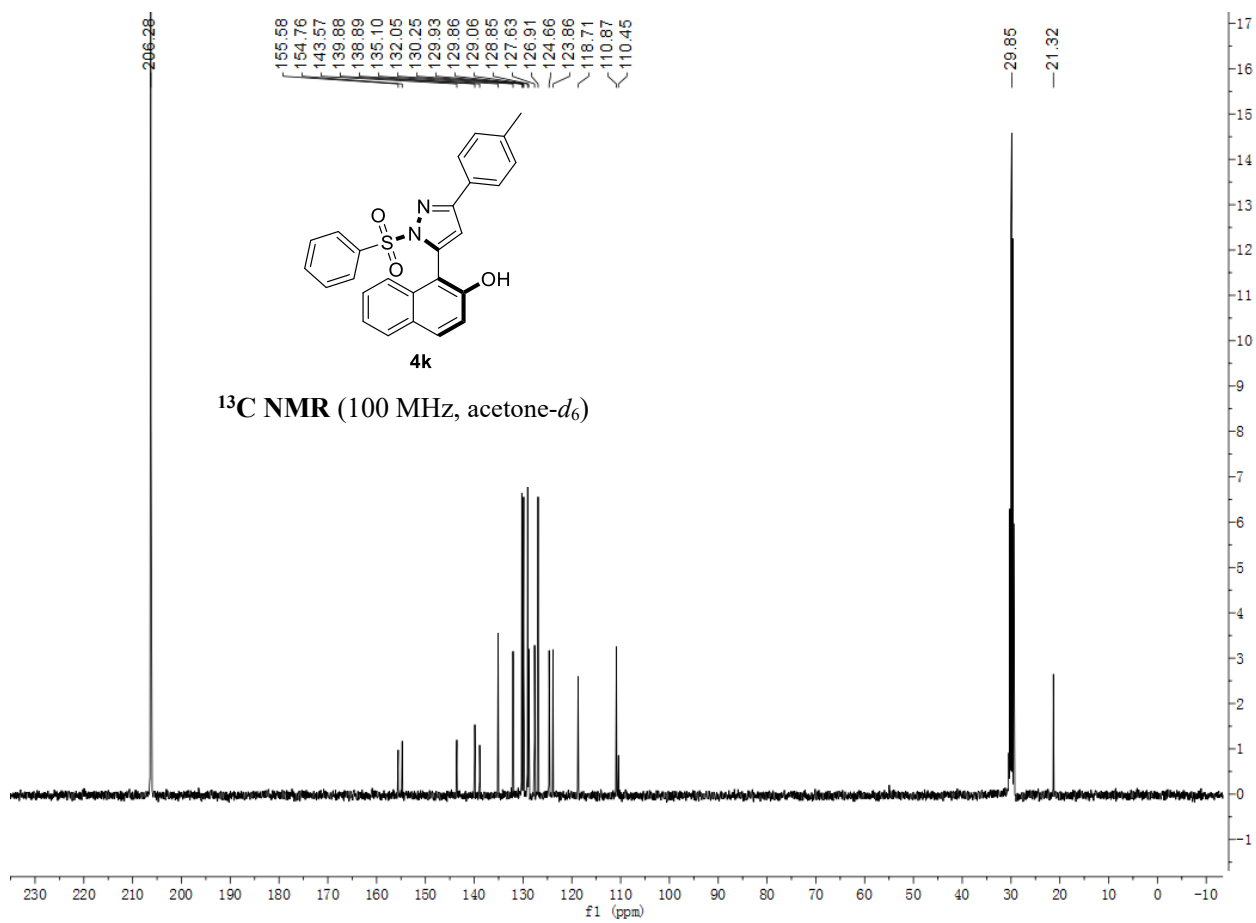

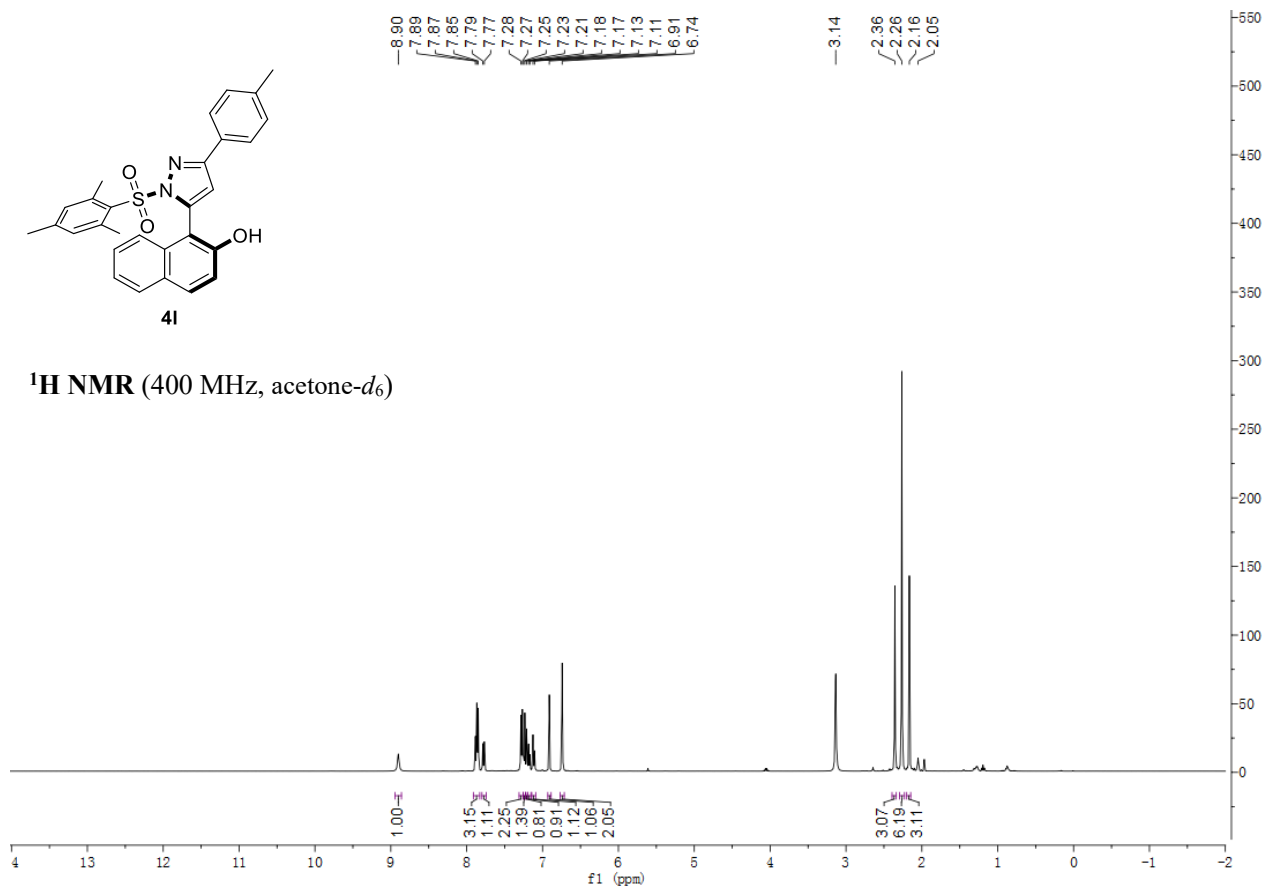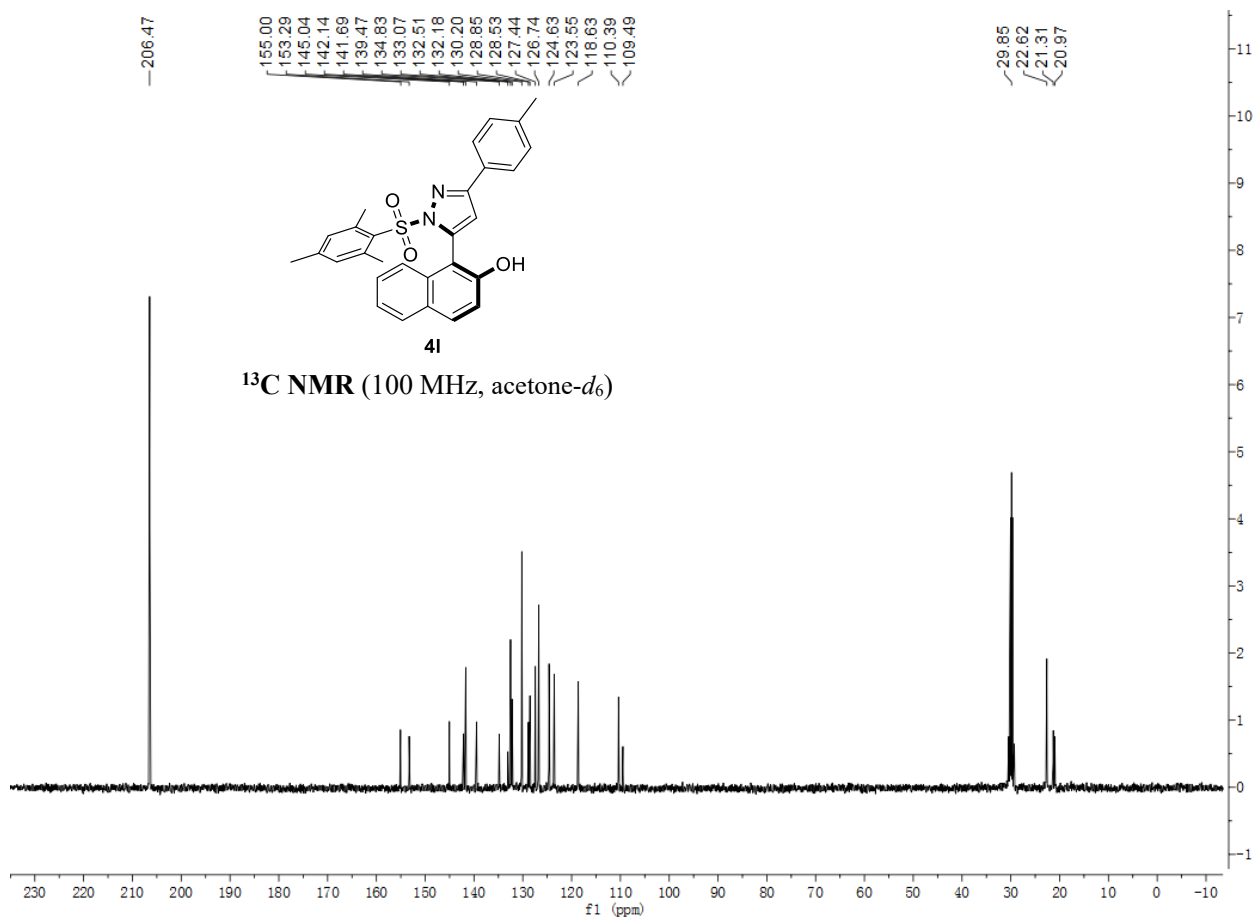

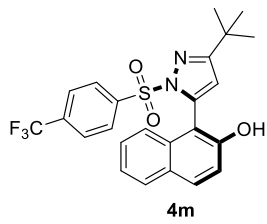

**<sup>1</sup>H NMR (400 MHz, CDCl<sub>3</sub>)**

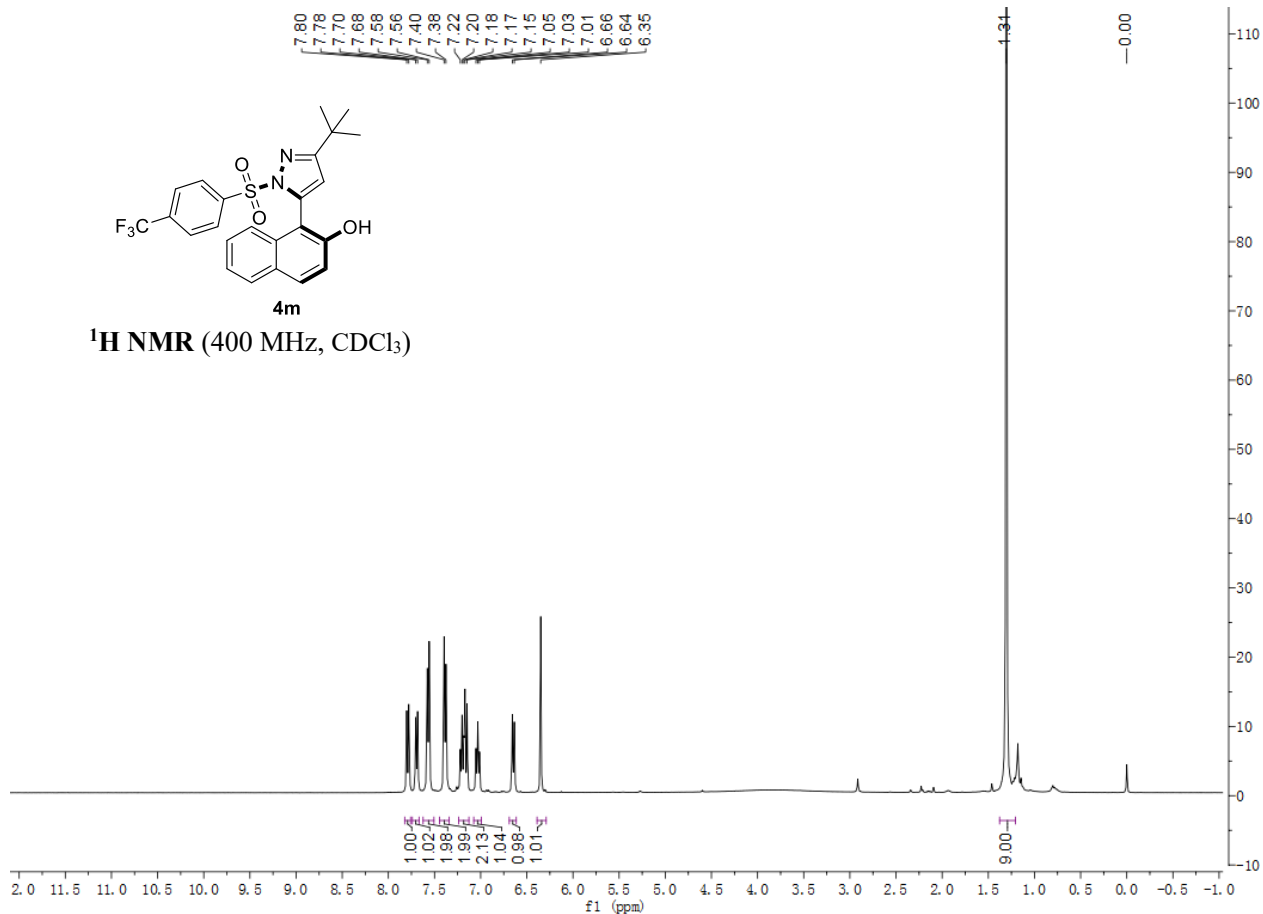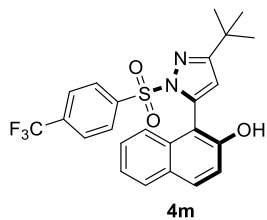

**<sup>13</sup>C NMR (100 MHz, CDCl<sub>3</sub>)**

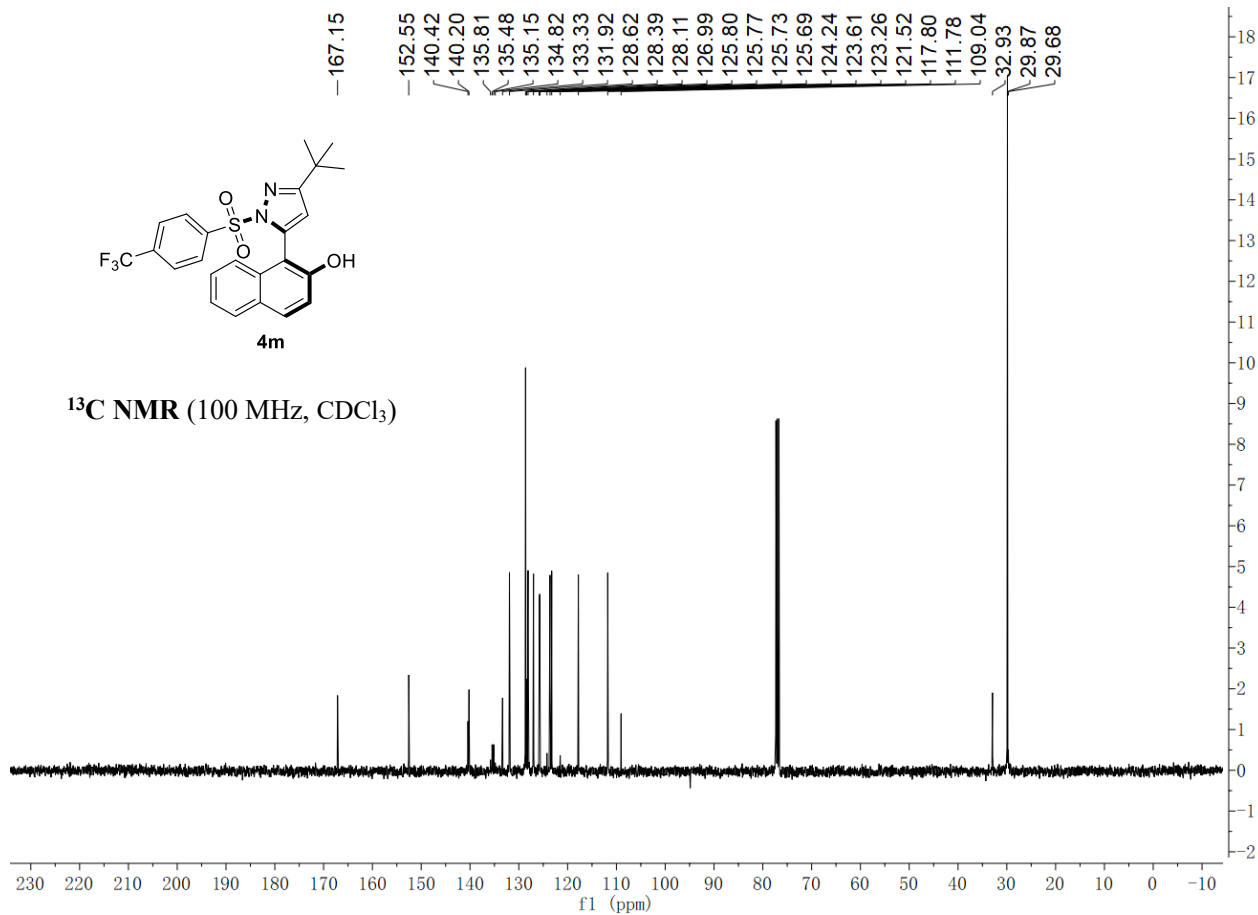



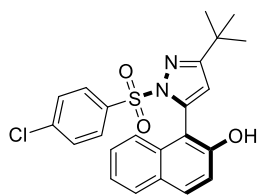

4n

$^1\text{H NMR}$  (400 MHz,  $\text{CDCl}_3$ )

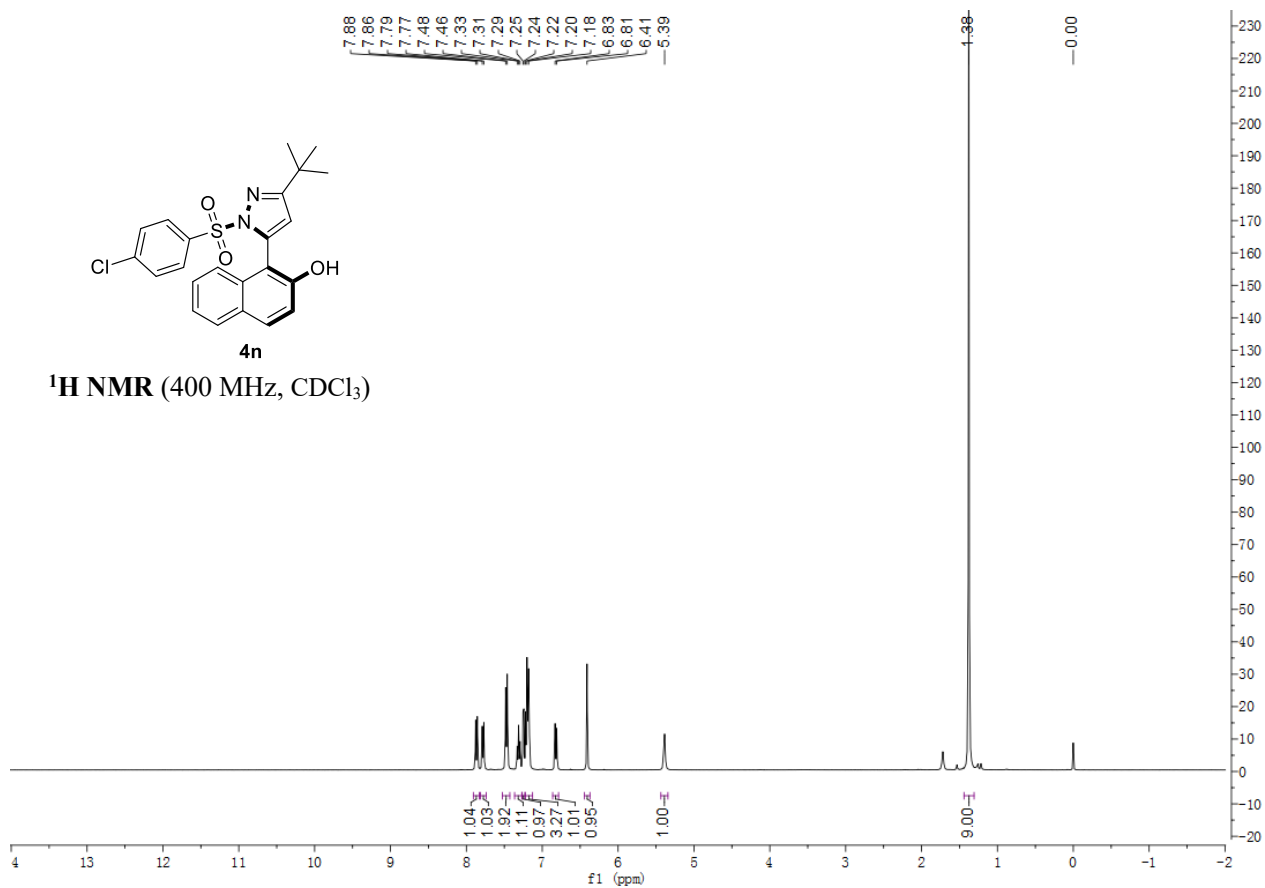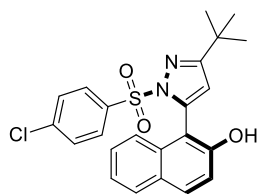

4n

$^{13}\text{C NMR}$  (100 MHz,  $\text{CDCl}_3$ )

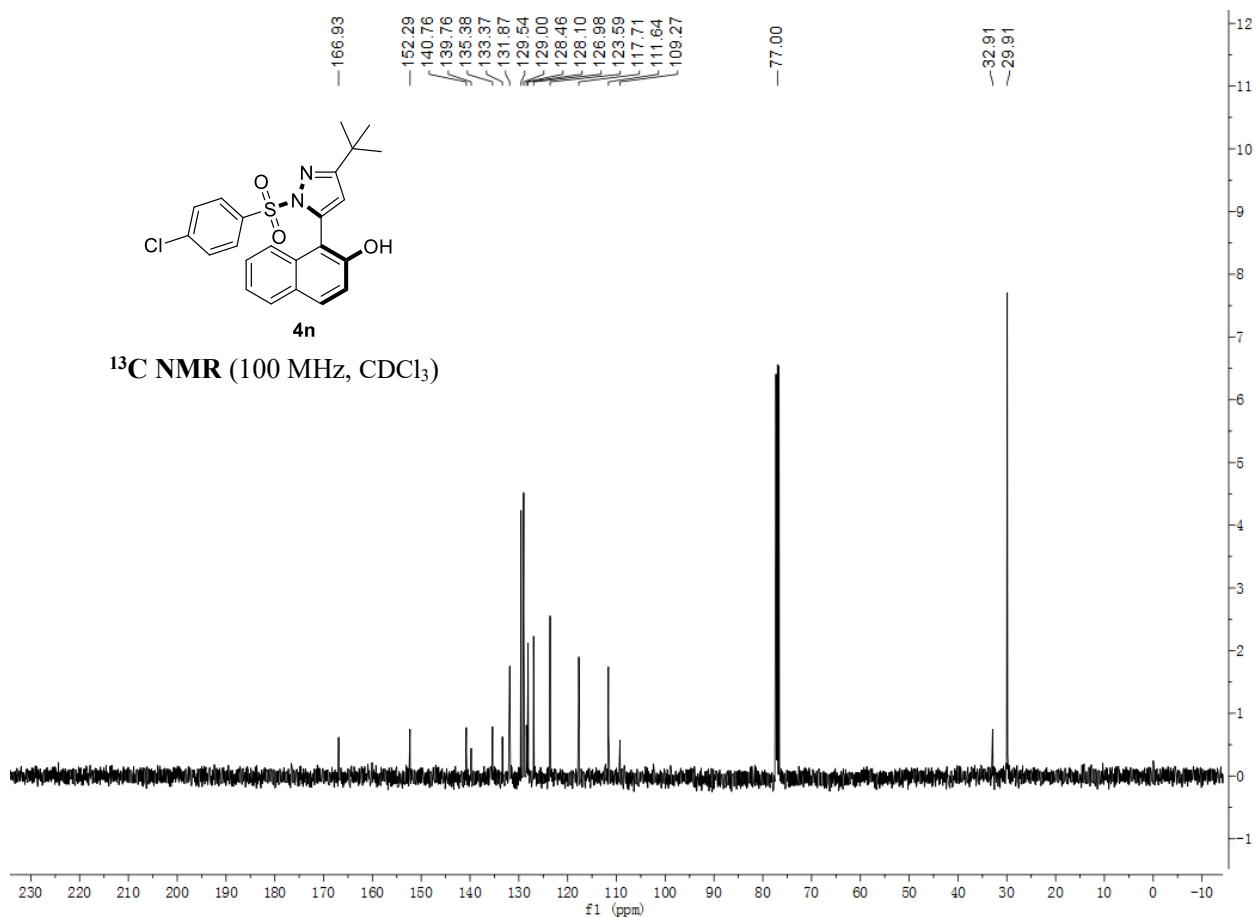

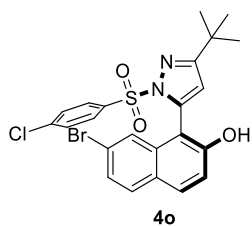

<sup>1</sup>H NMR (400 MHz, CDCl<sub>3</sub>)

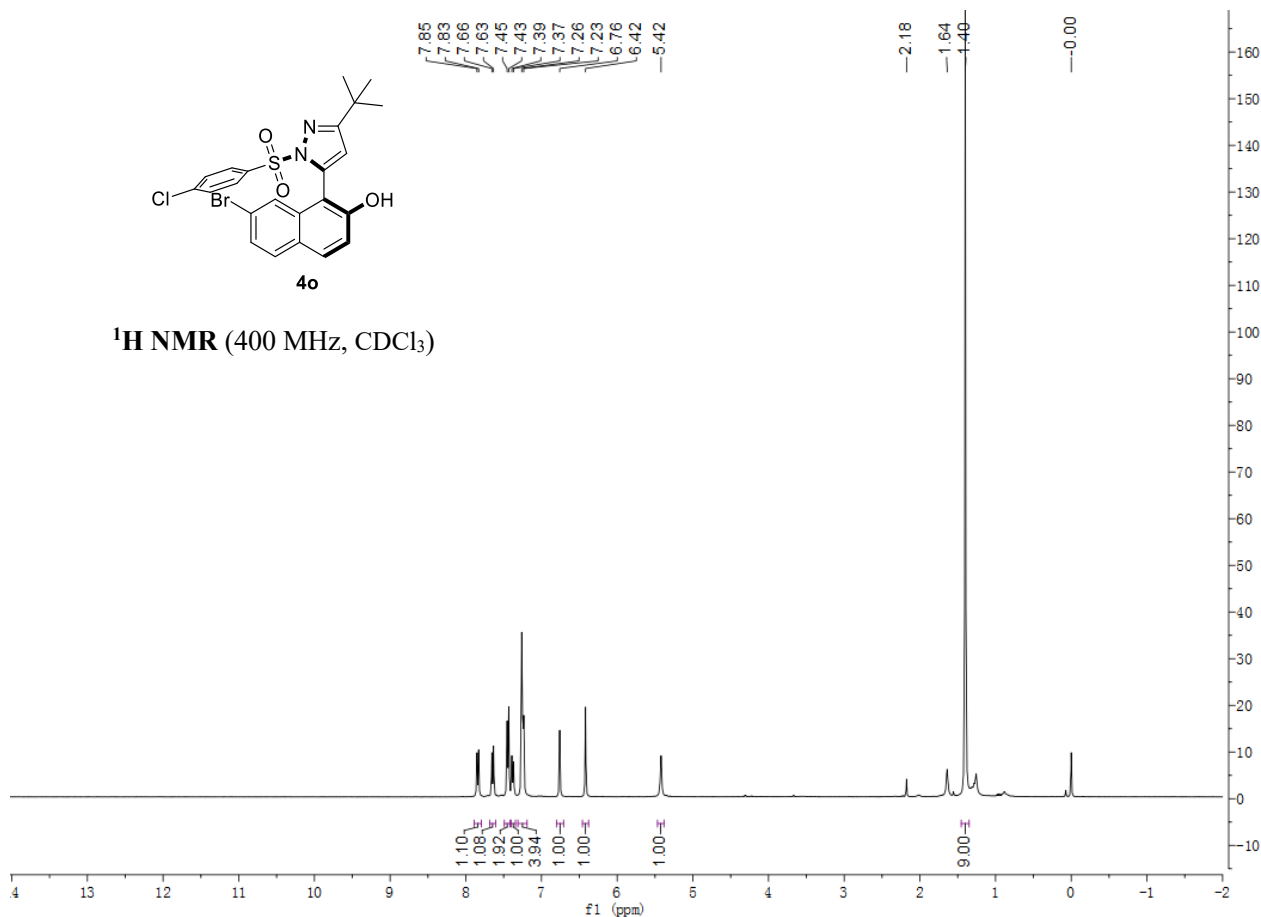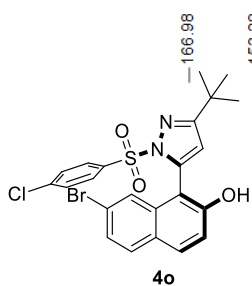

<sup>13</sup>C NMR (100 MHz, CDCl<sub>3</sub>)

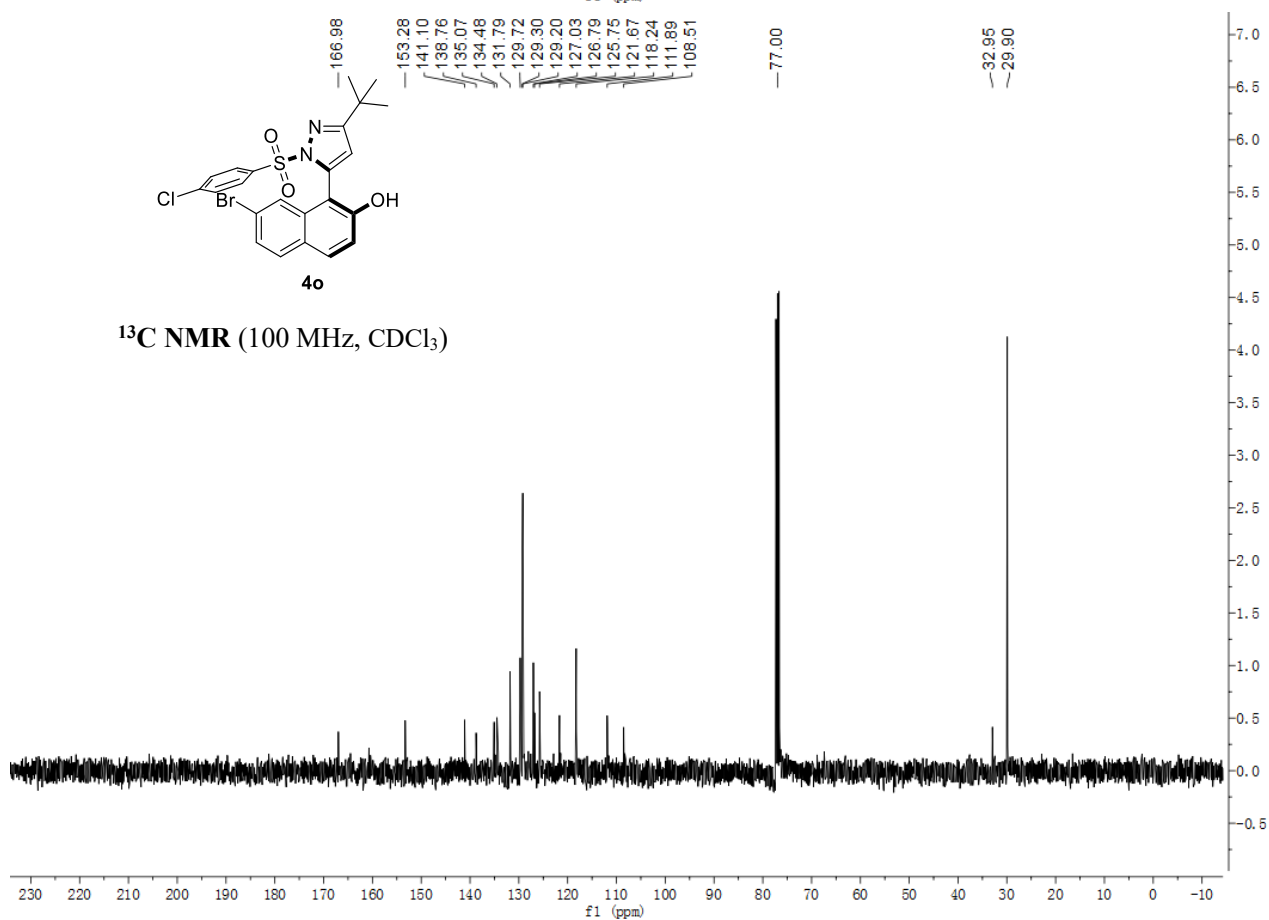

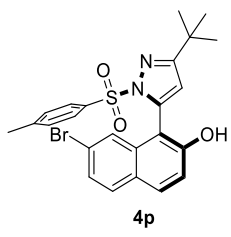

<sup>1</sup>H NMR (400 MHz, CDCl<sub>3</sub>)

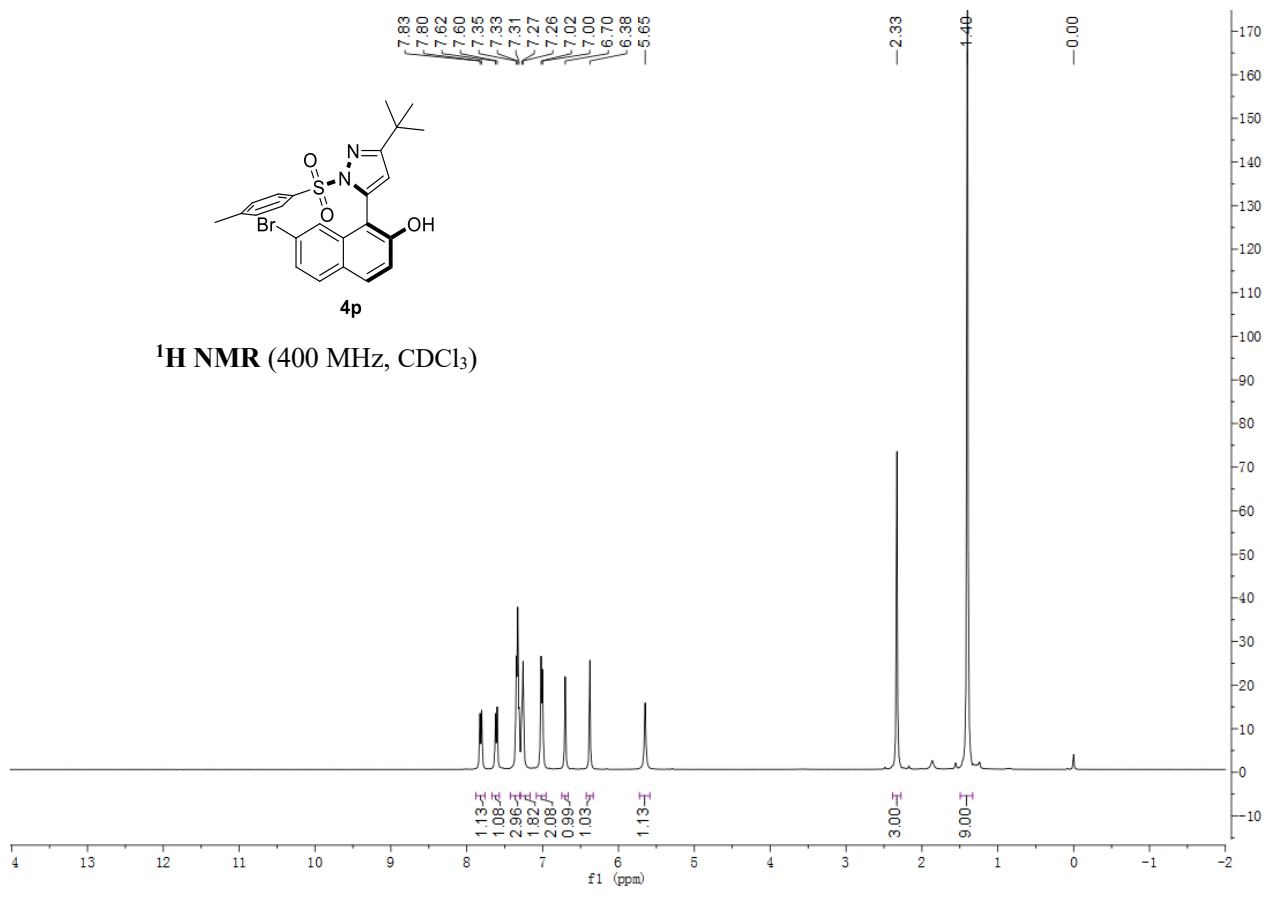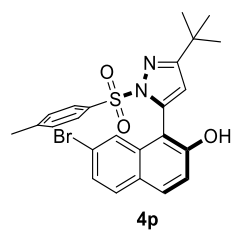

<sup>13</sup>C NMR (100 MHz, CDCl<sub>3</sub>)

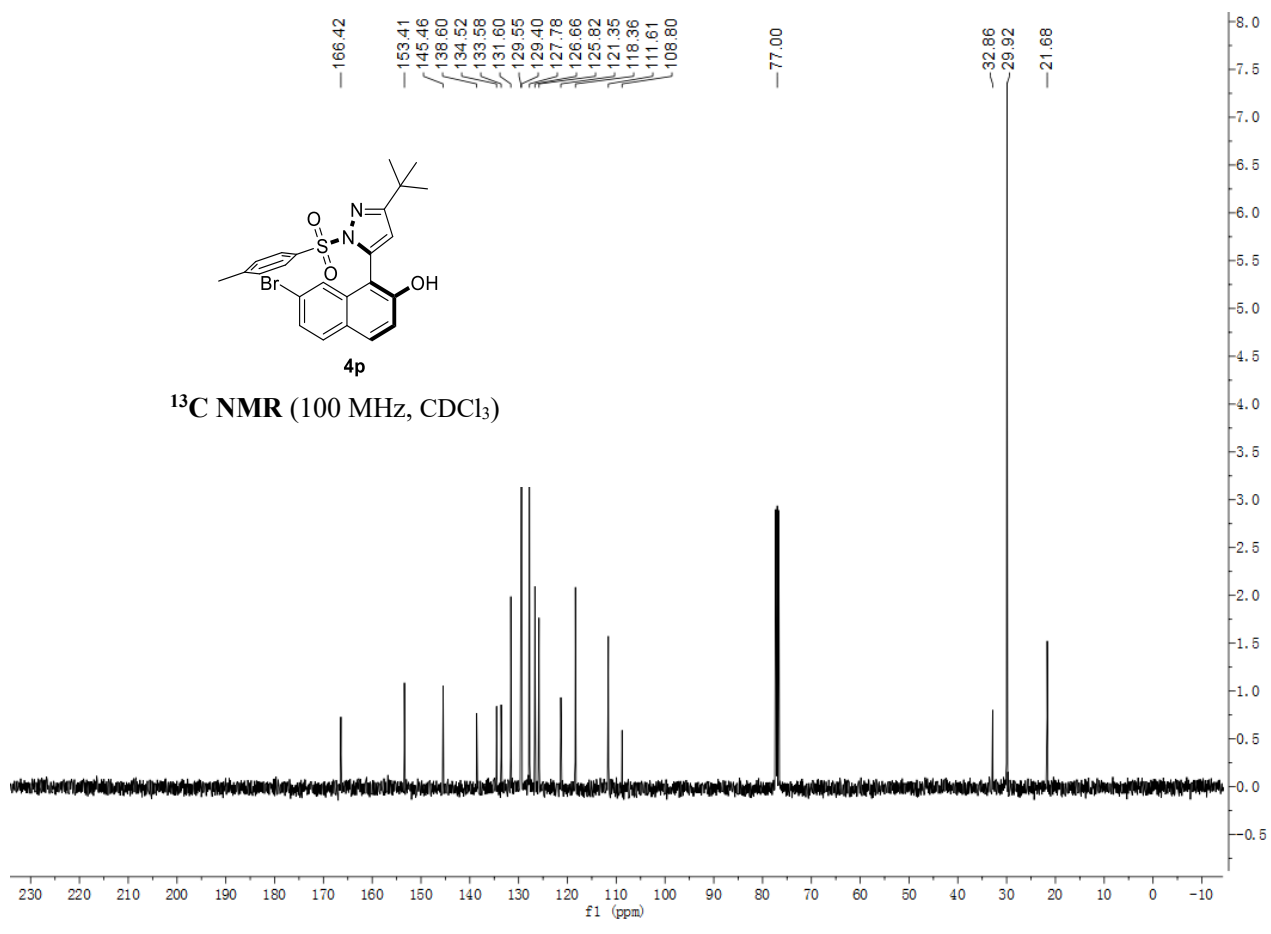

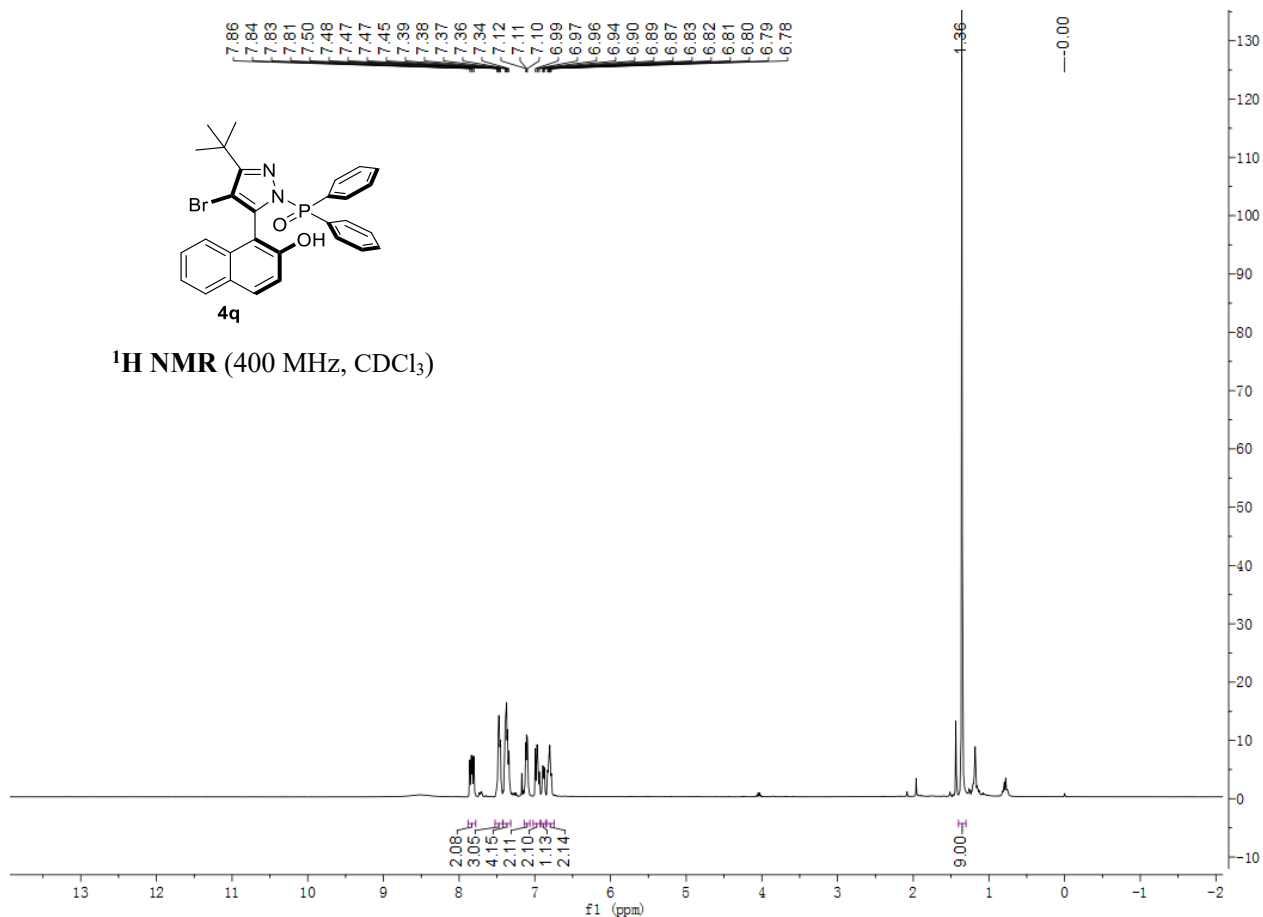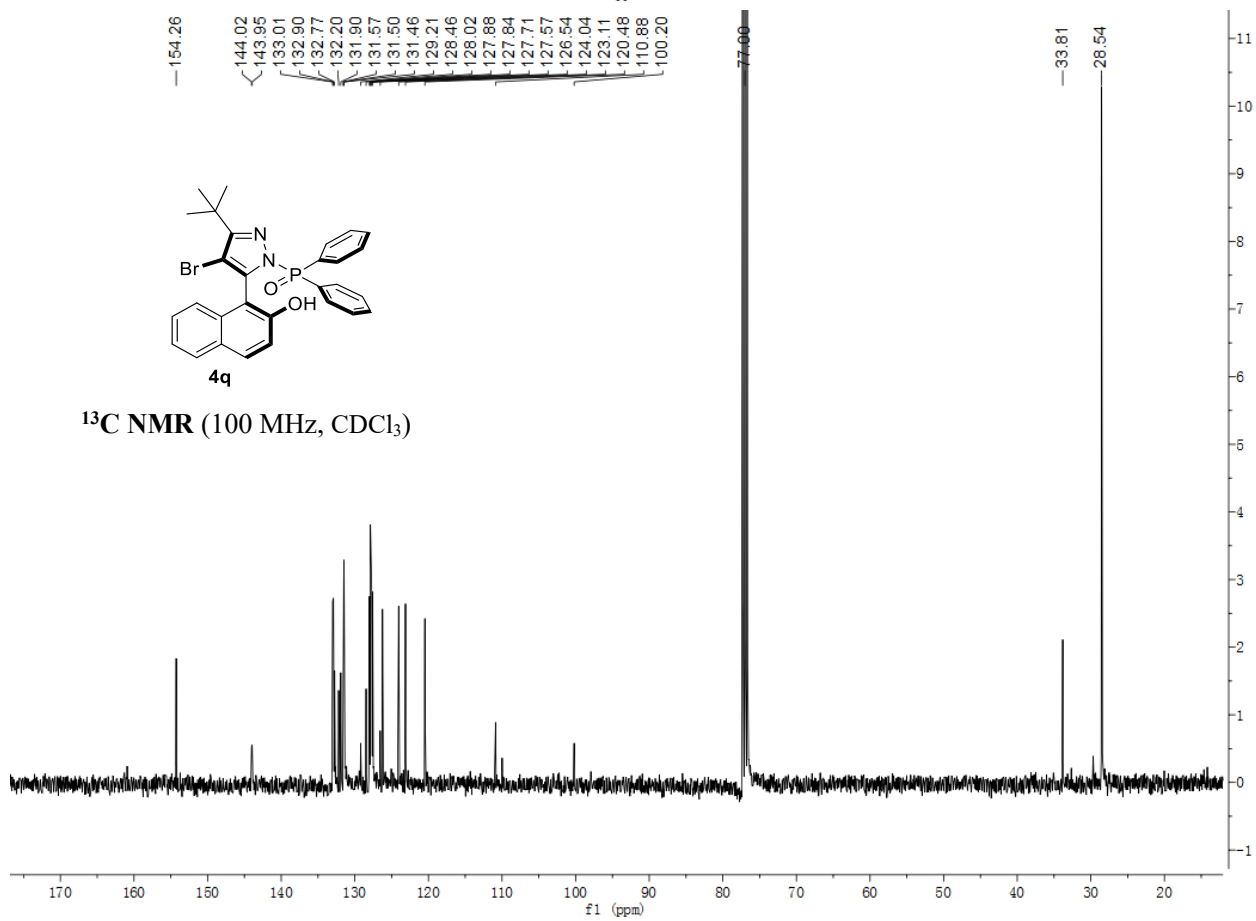

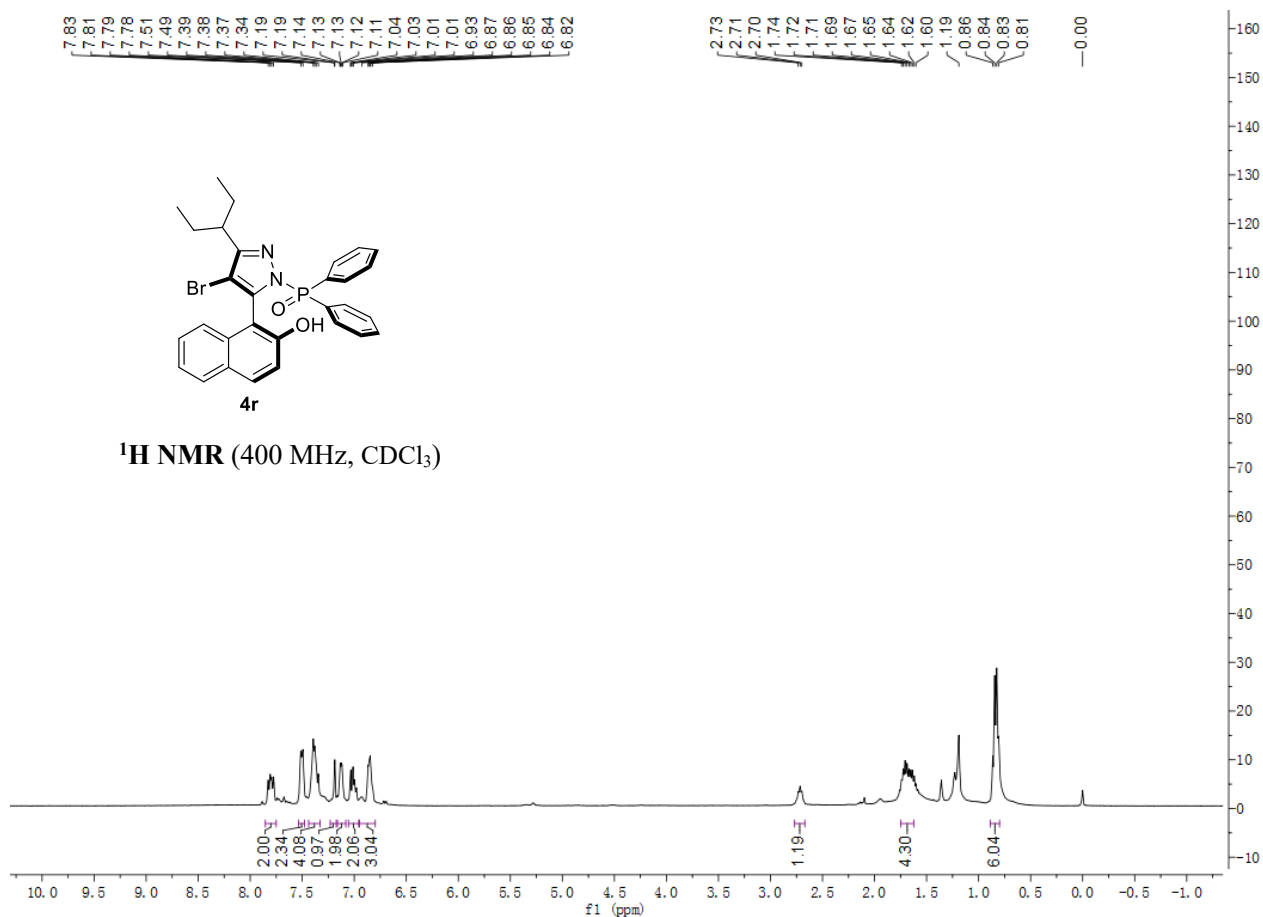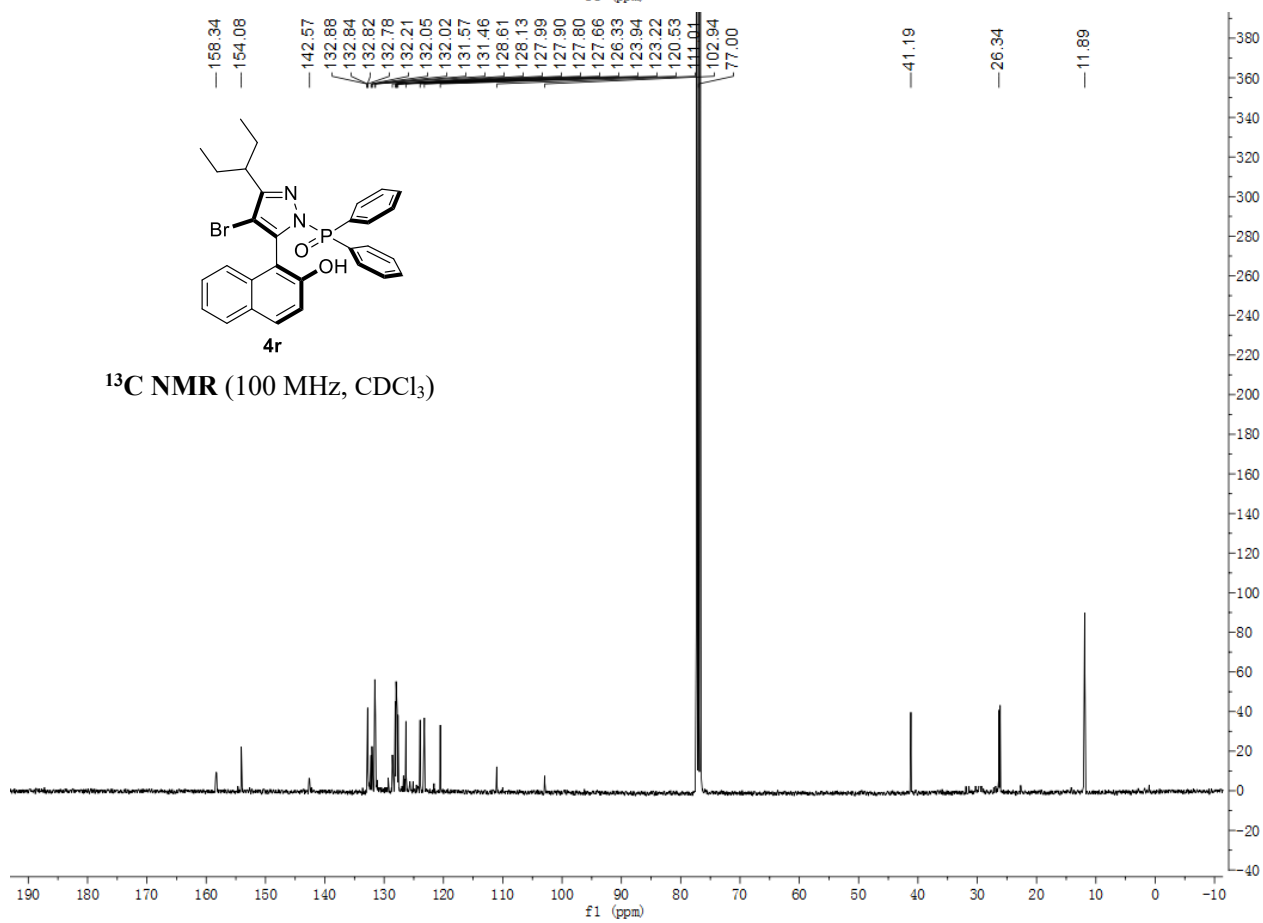

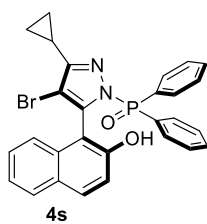

$^1\text{H NMR}$  (400 MHz,  $\text{CDCl}_3$ )

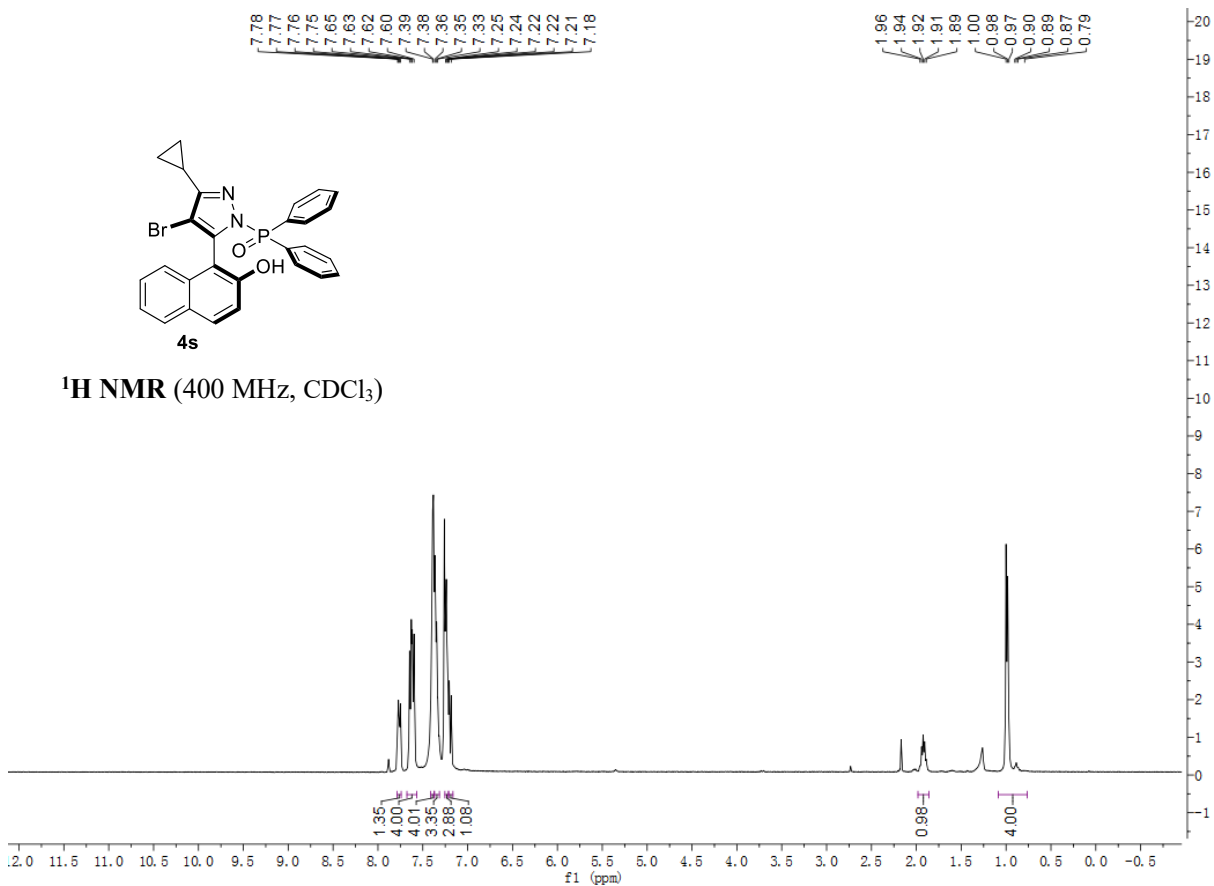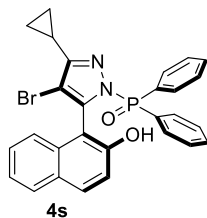

$^{13}\text{C NMR}$  (100 MHz,  $\text{CDCl}_3$ )

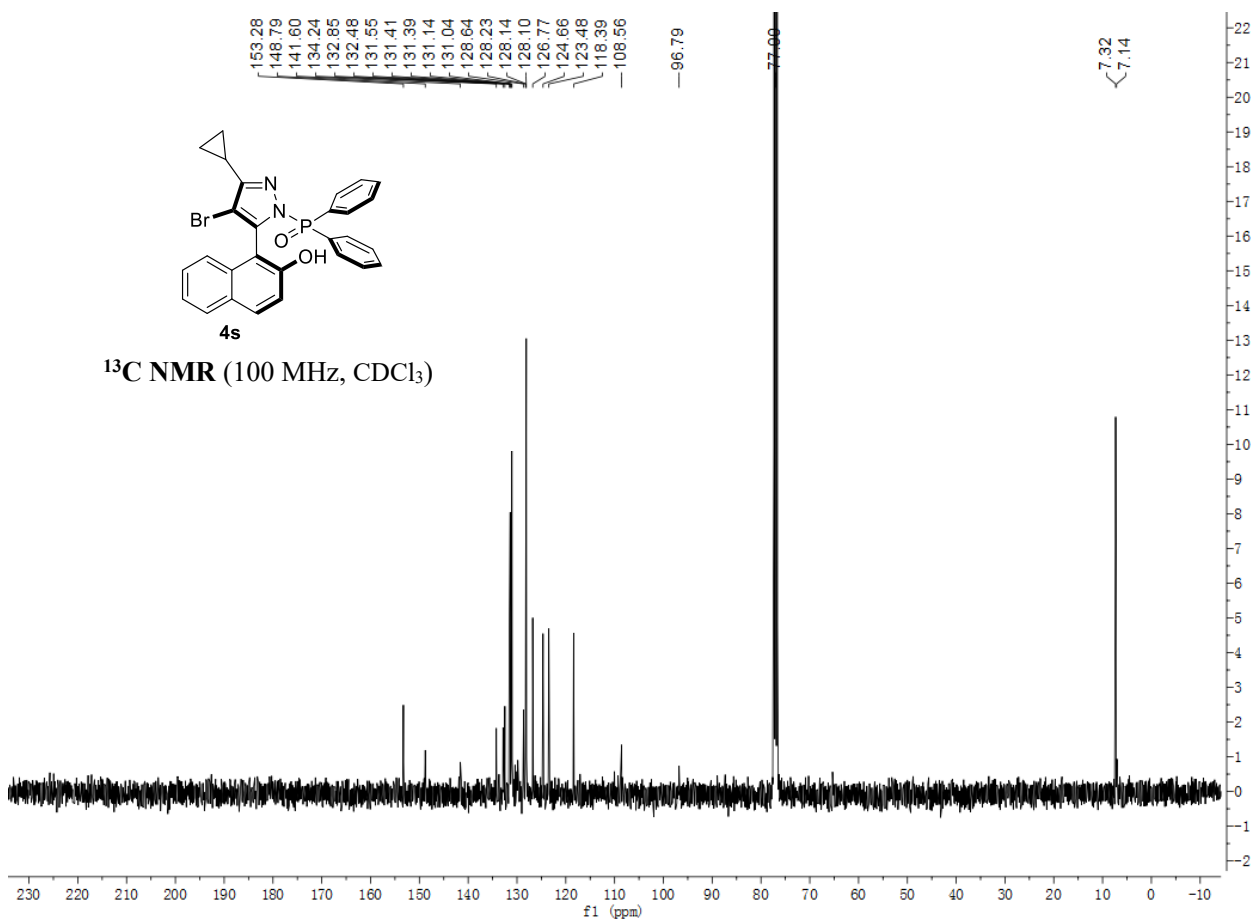

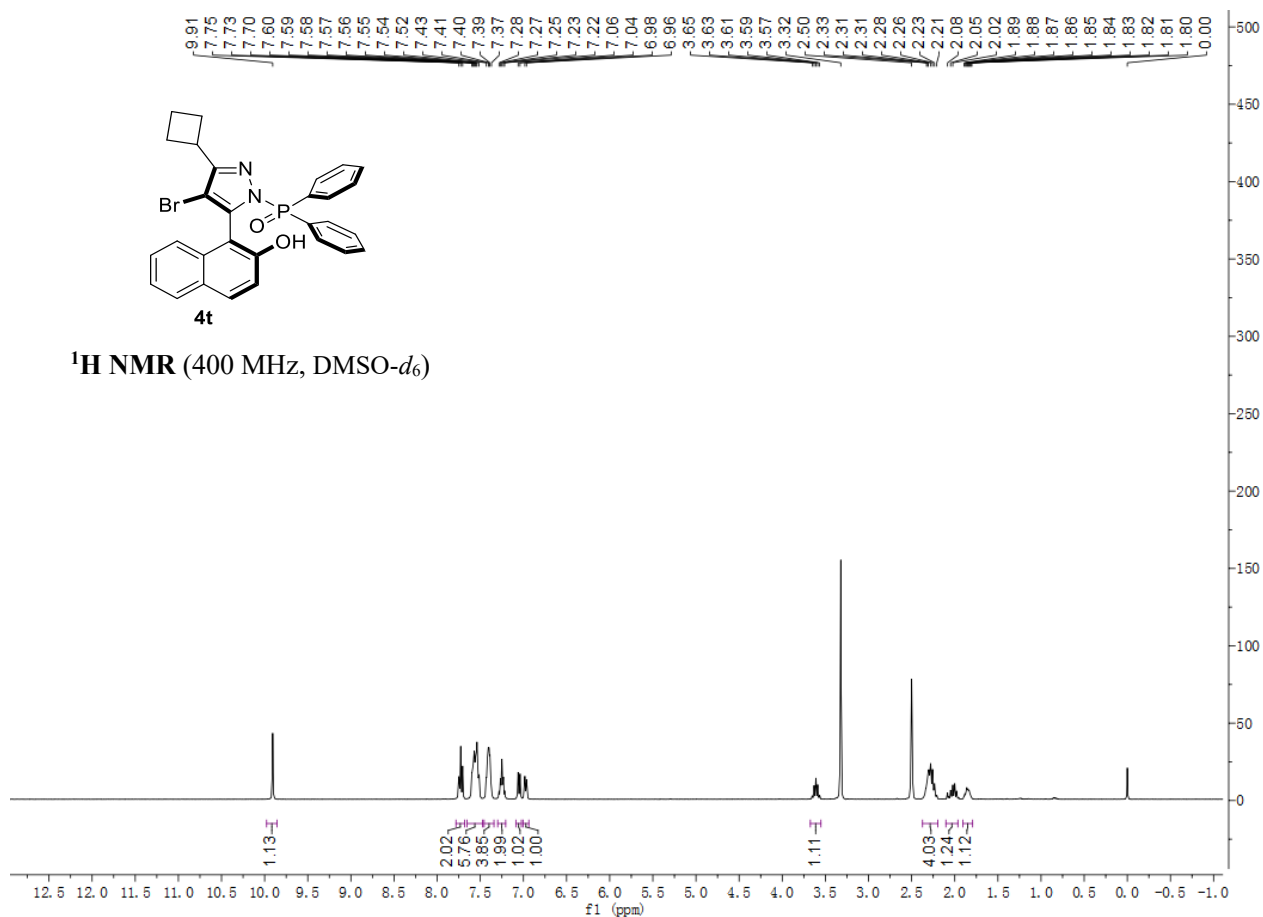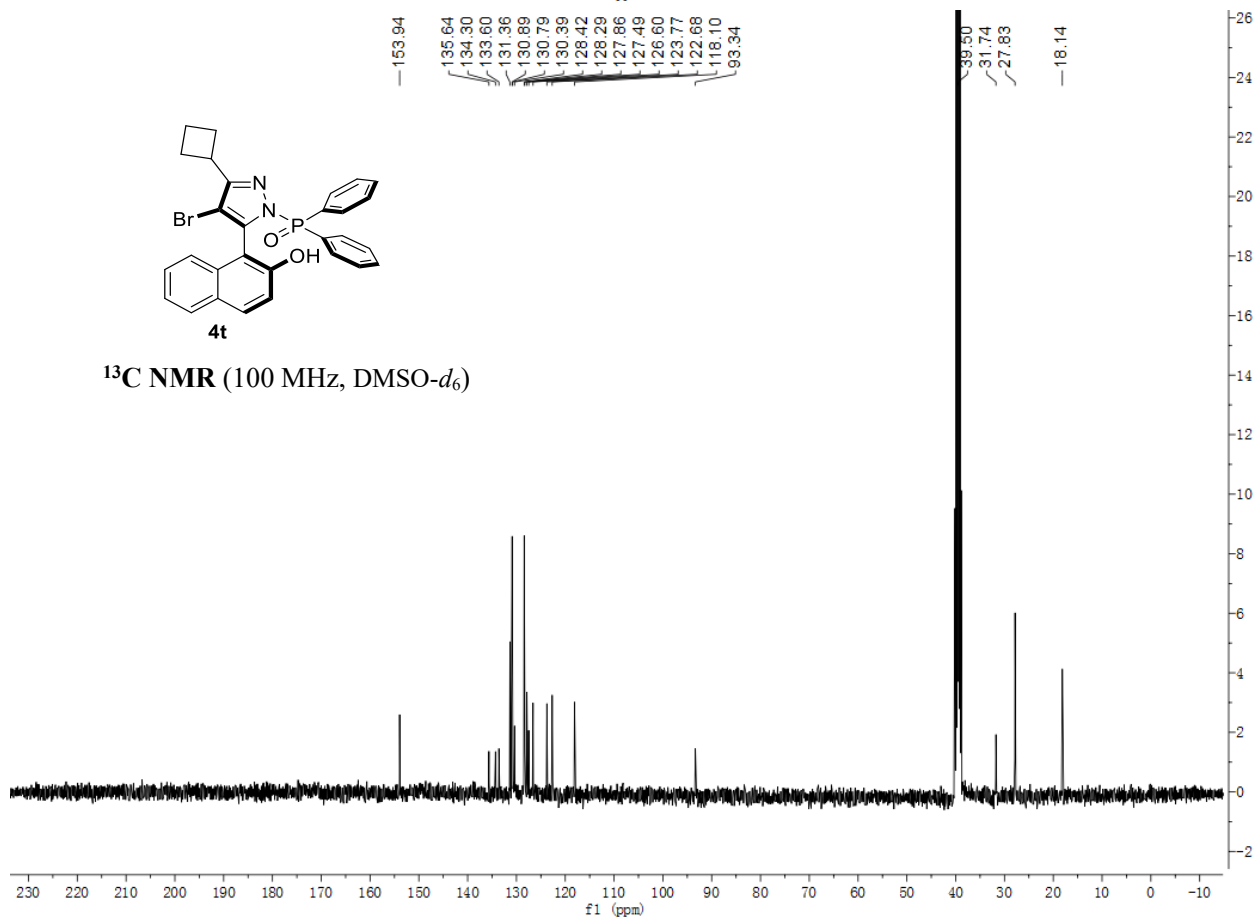

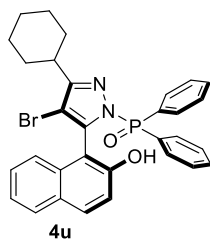

$^1\text{H NMR}$  (400 MHz,  $\text{CDCl}_3$ )

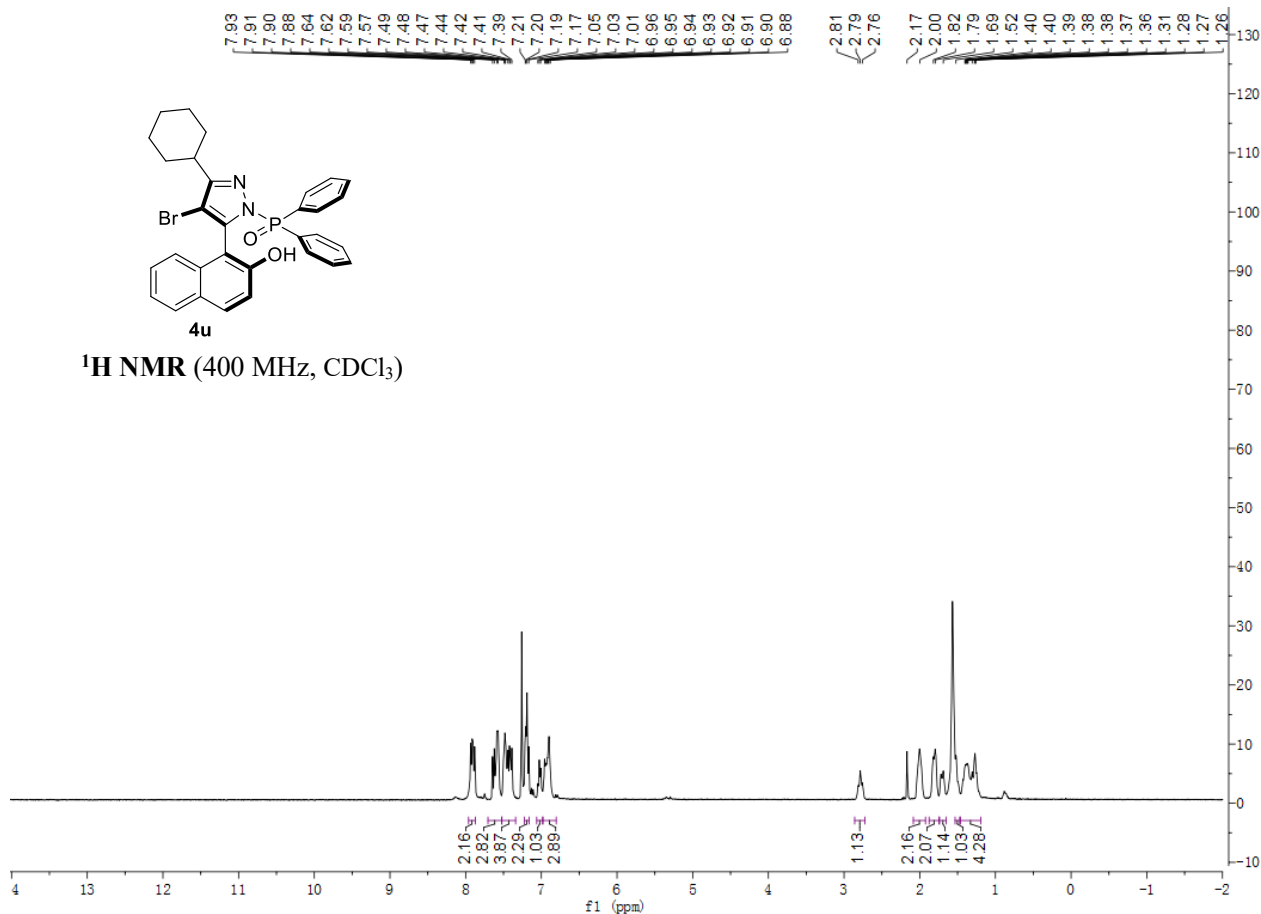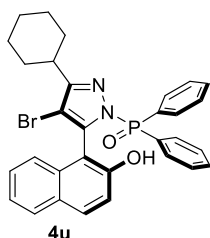

$^{13}\text{C NMR}$  (100 MHz,  $\text{CDCl}_3$ )

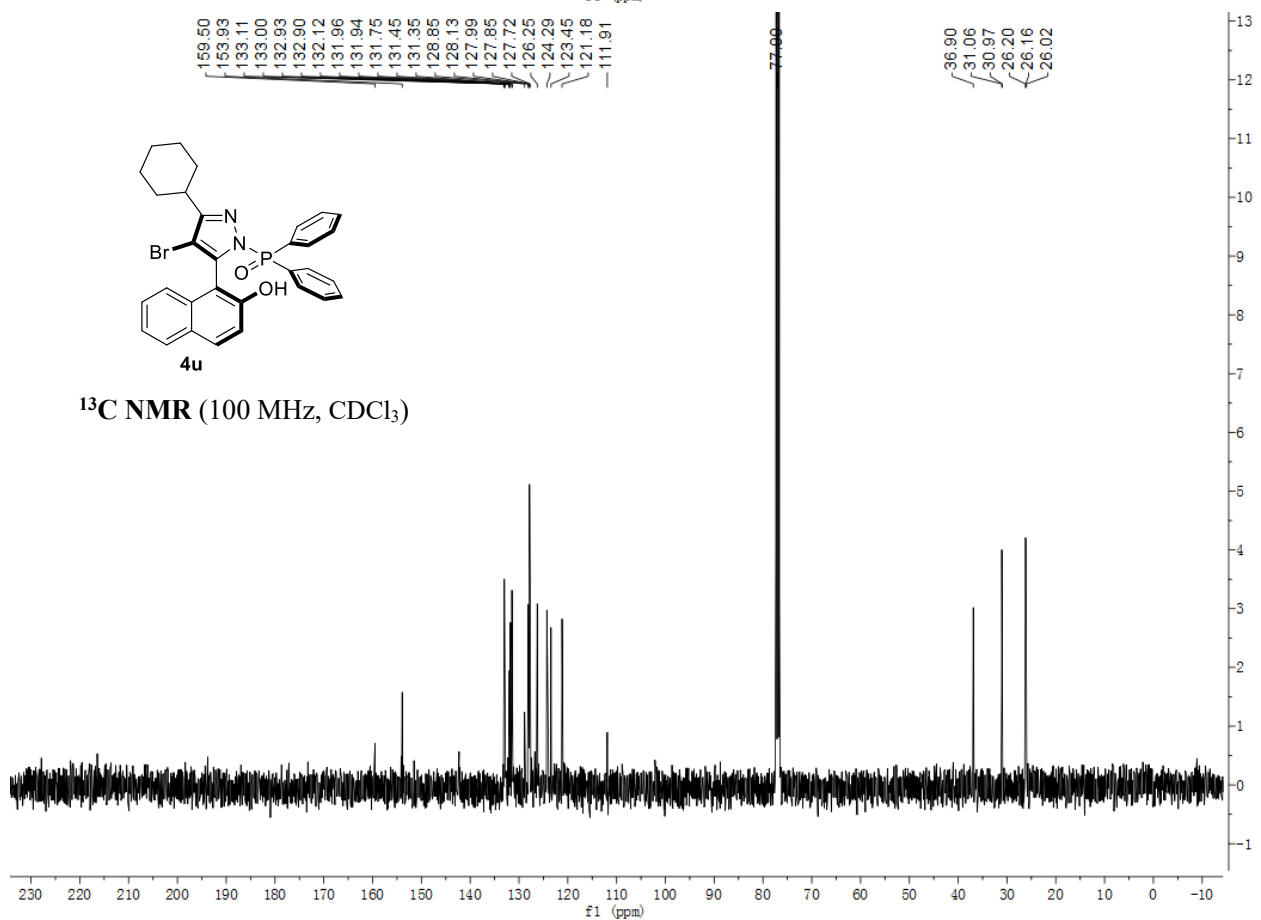



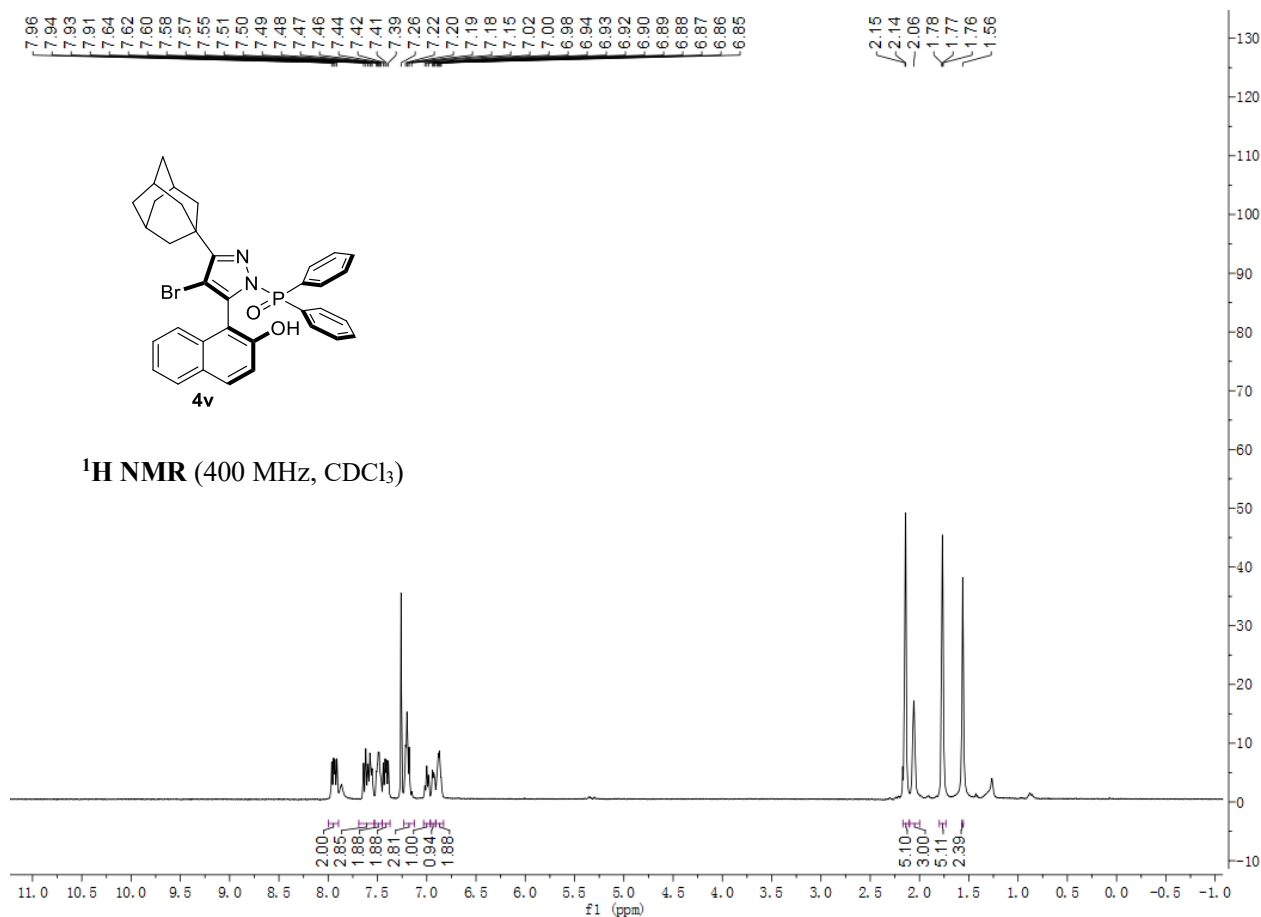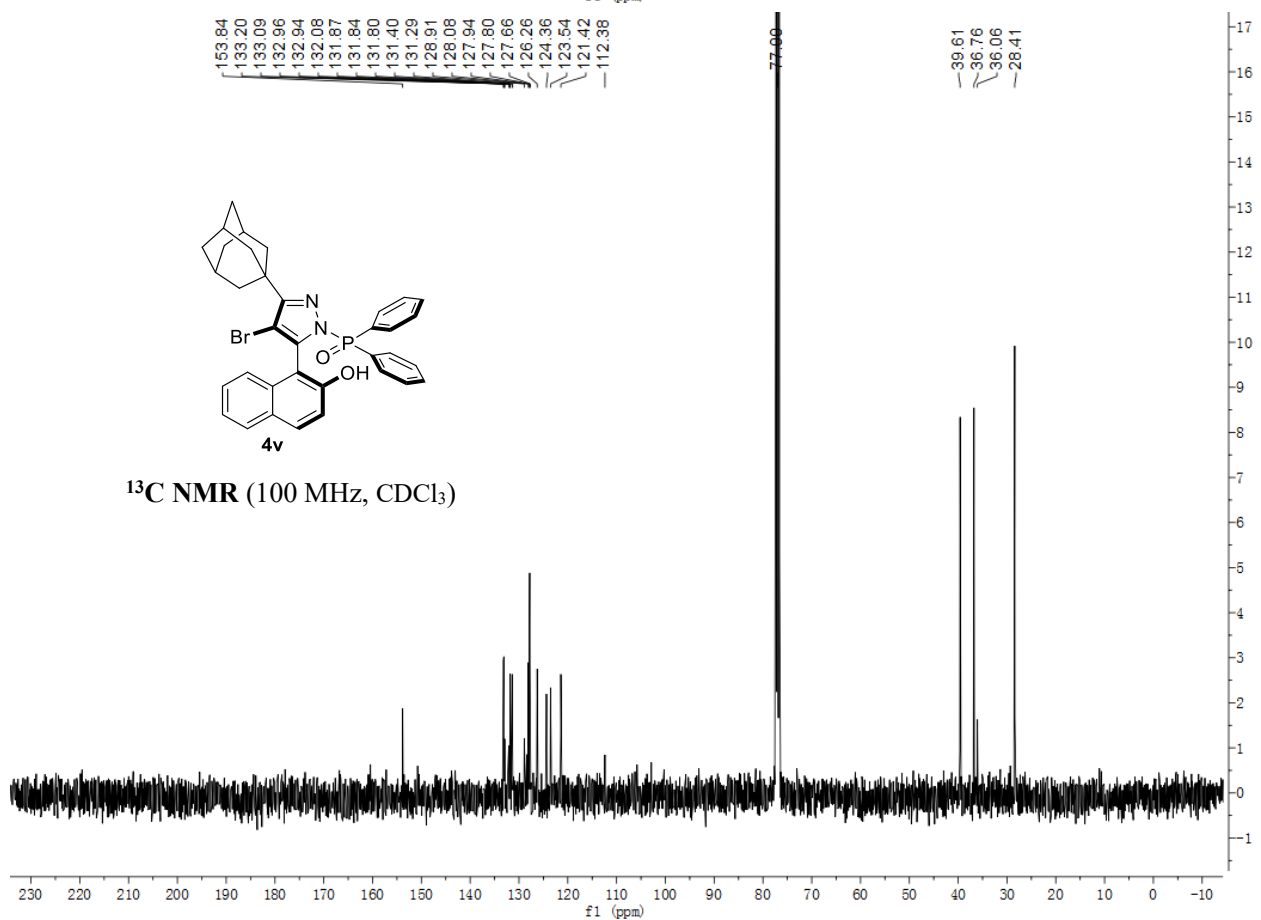

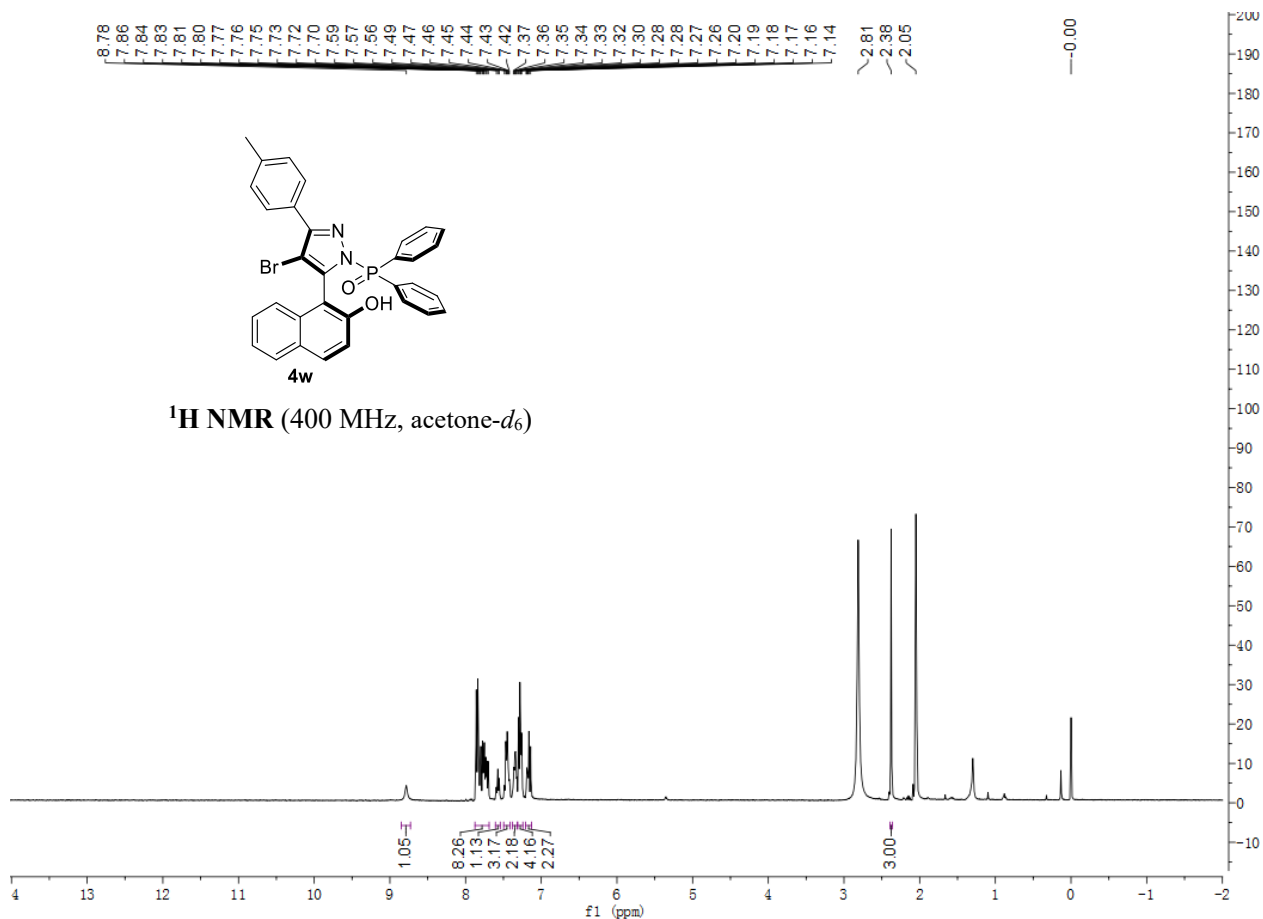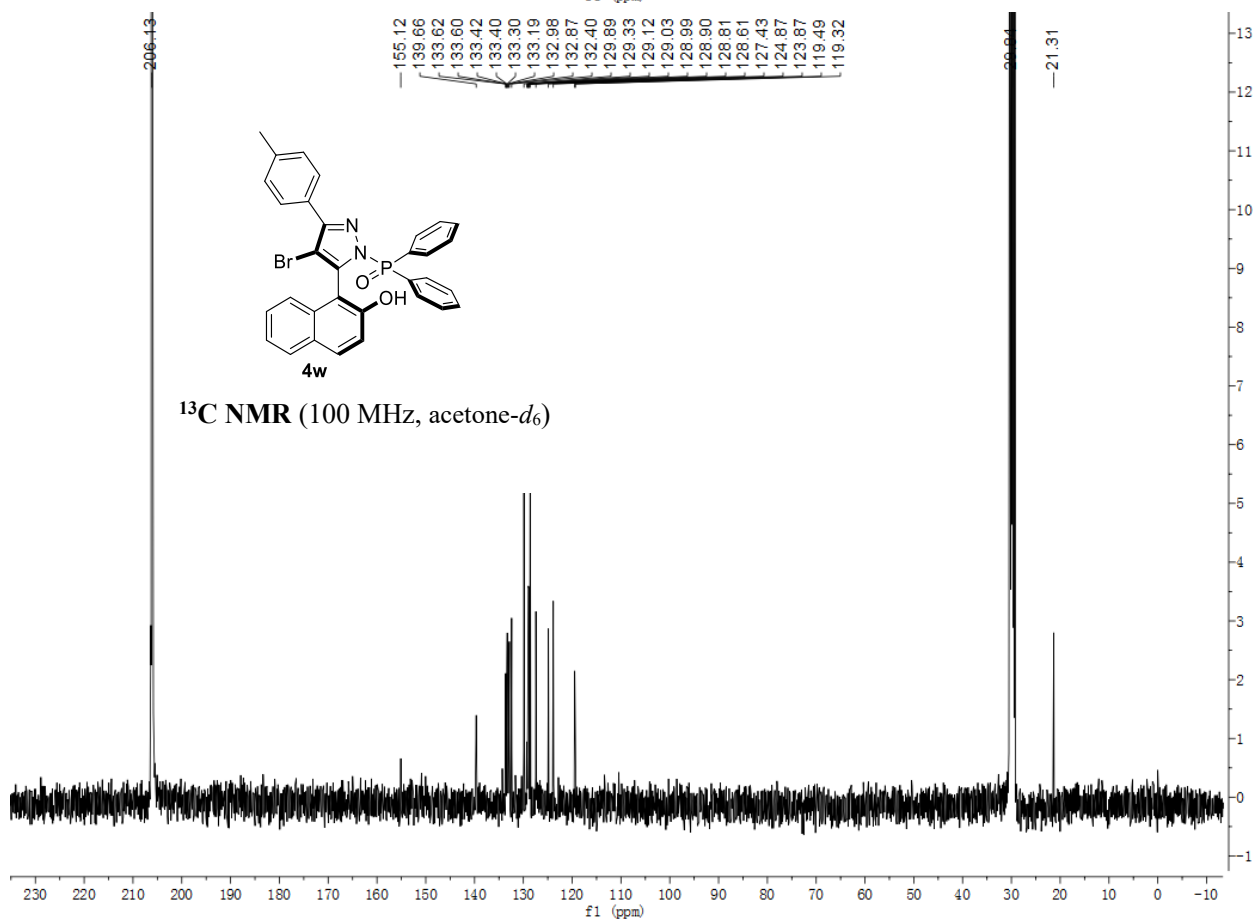

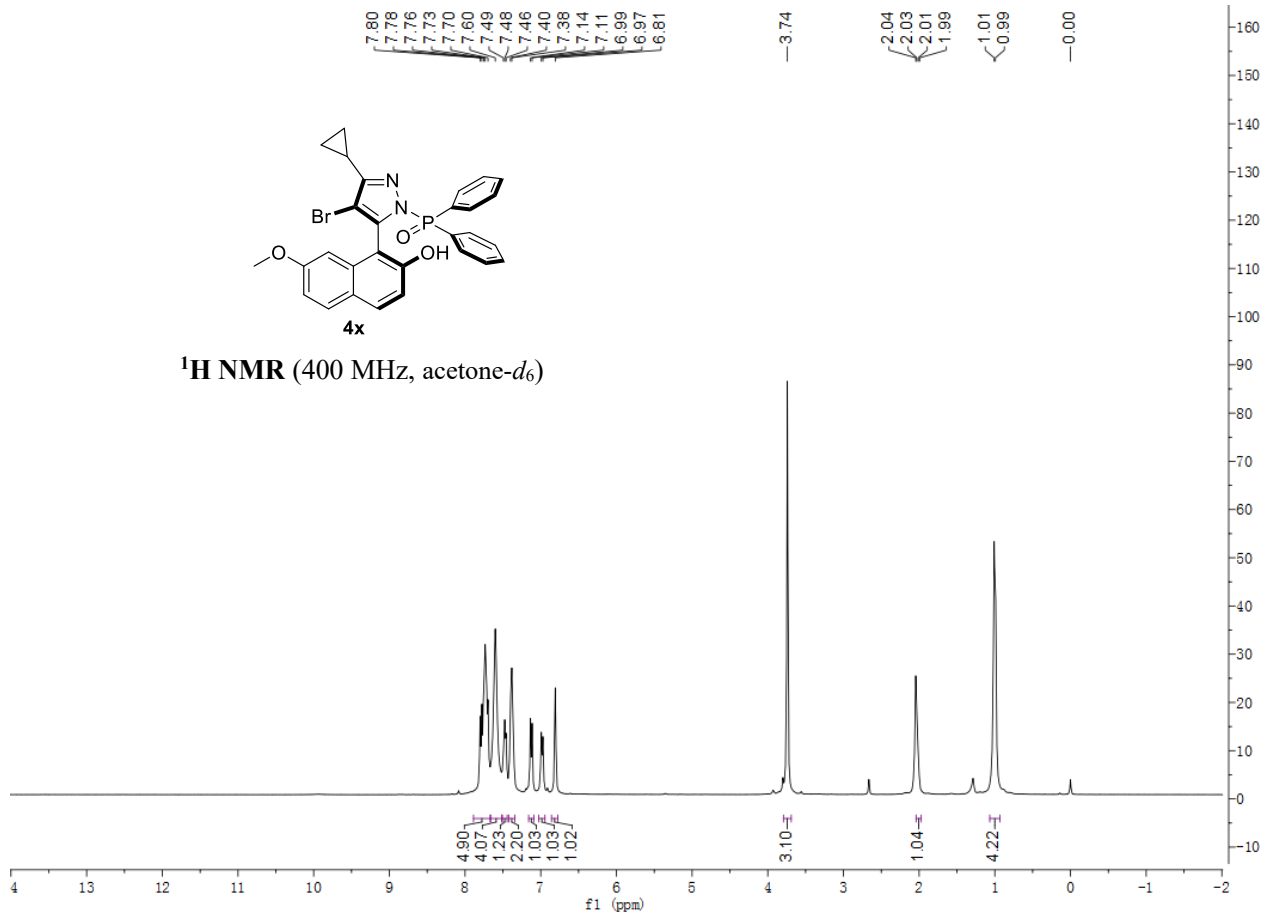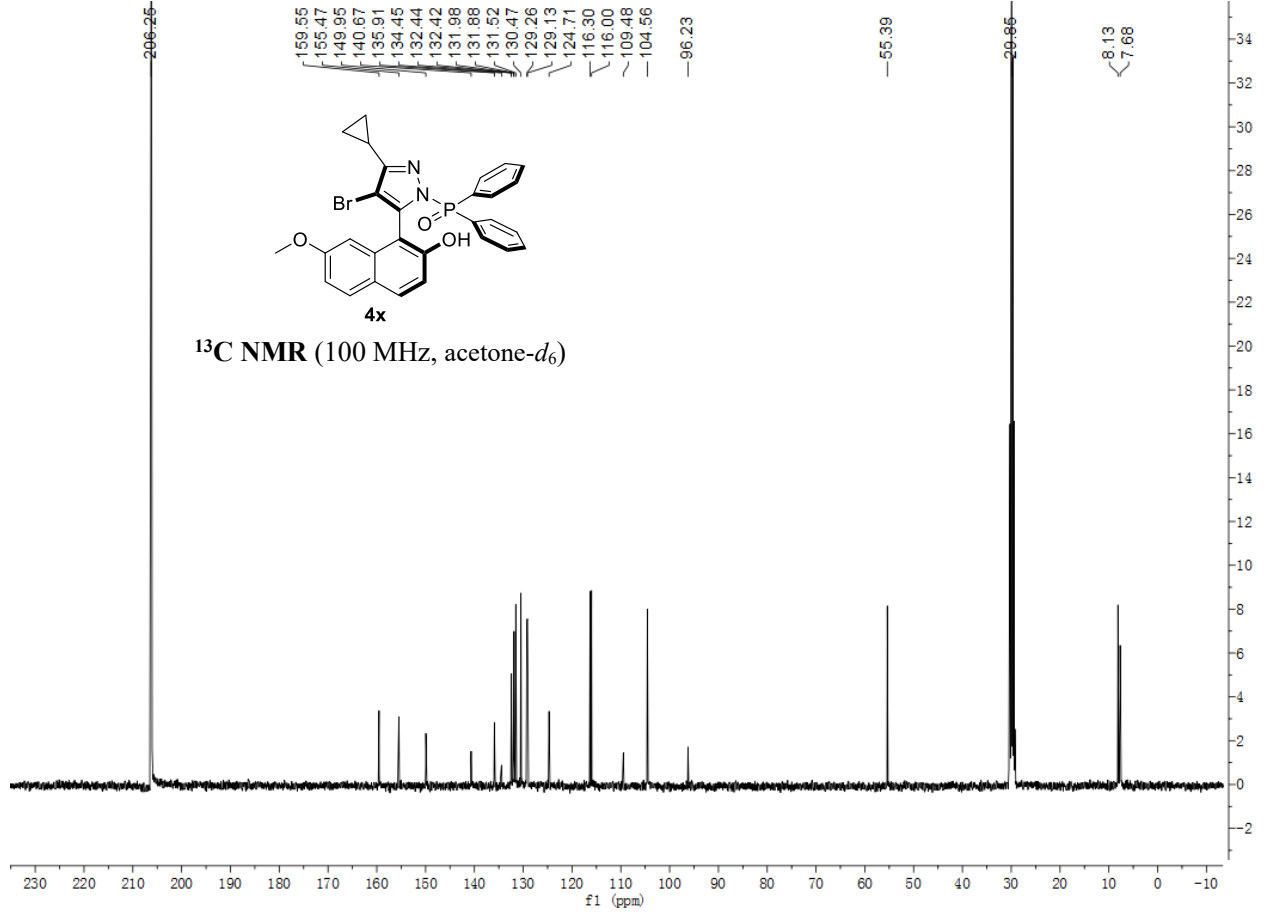

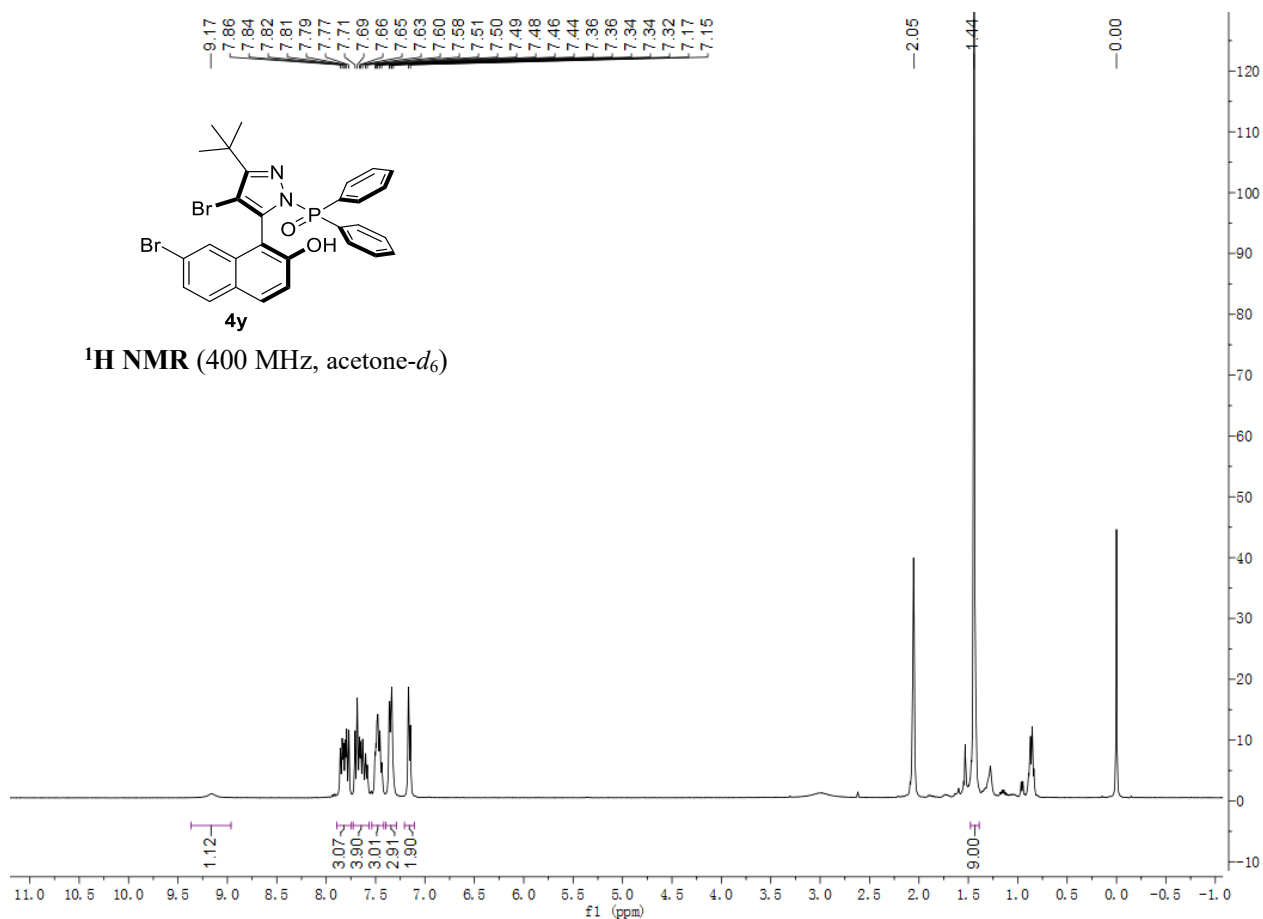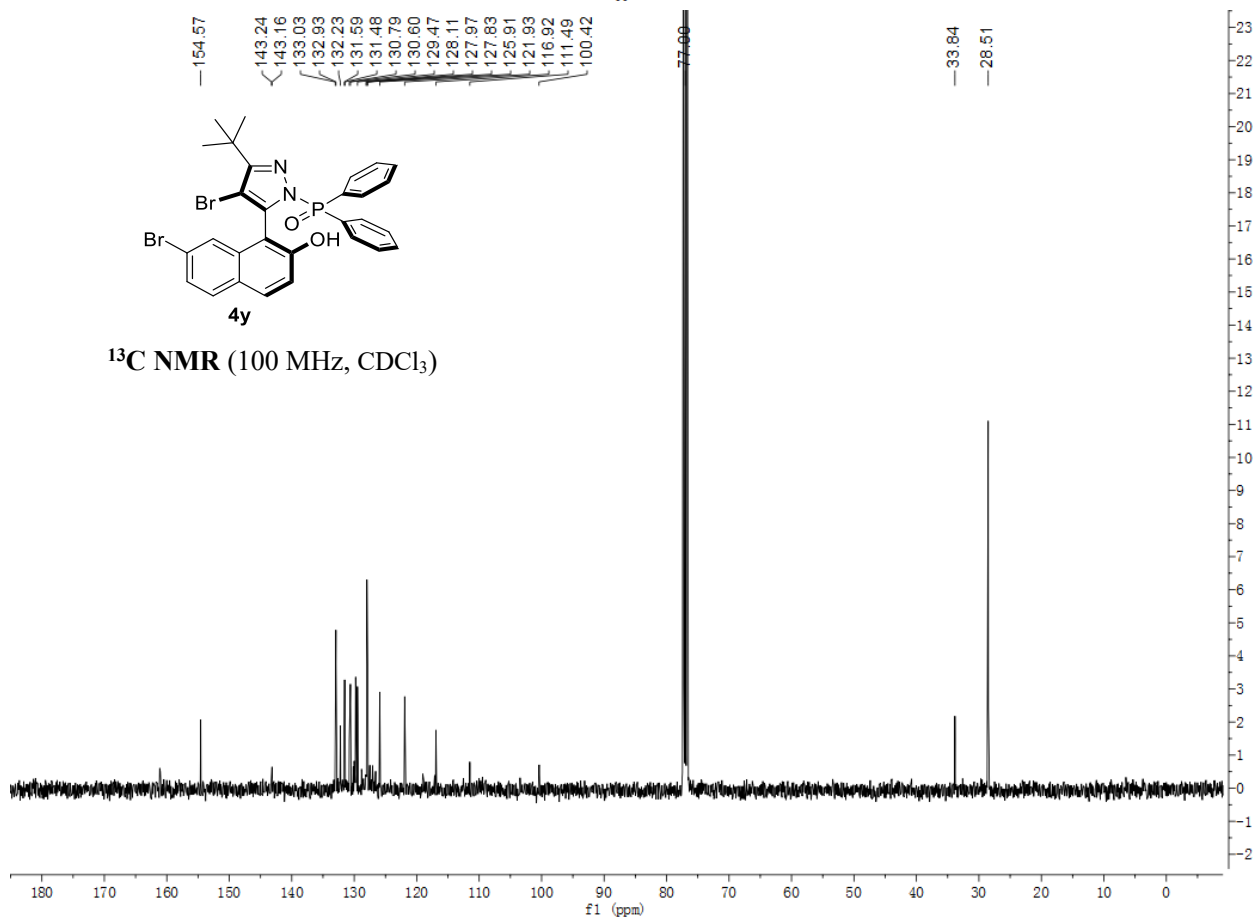

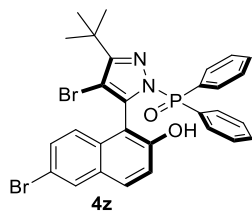

<sup>1</sup>H NMR (400 MHz, CDCl<sub>3</sub>)

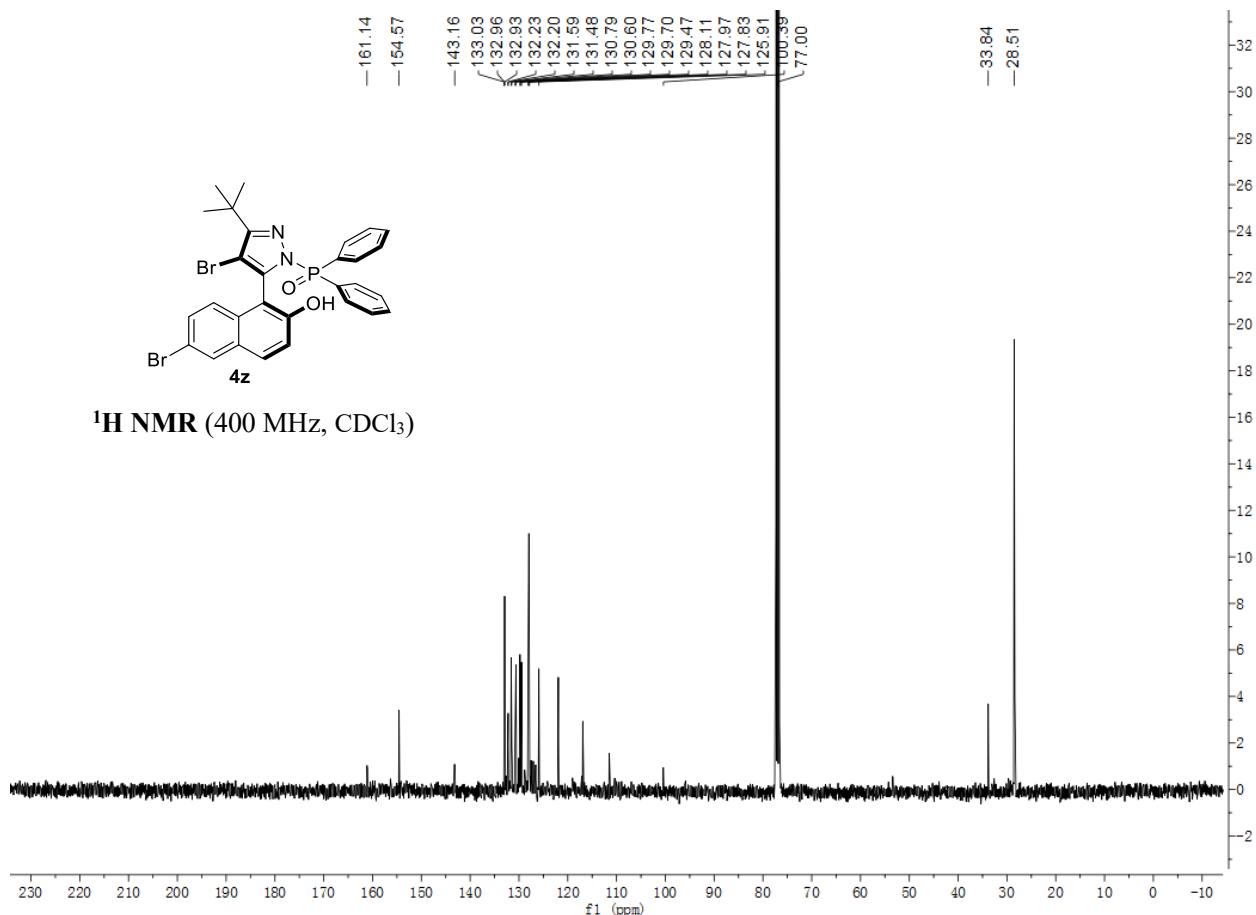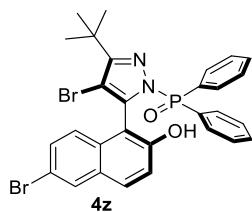

<sup>13</sup>C NMR (100 MHz, CDCl<sub>3</sub>)

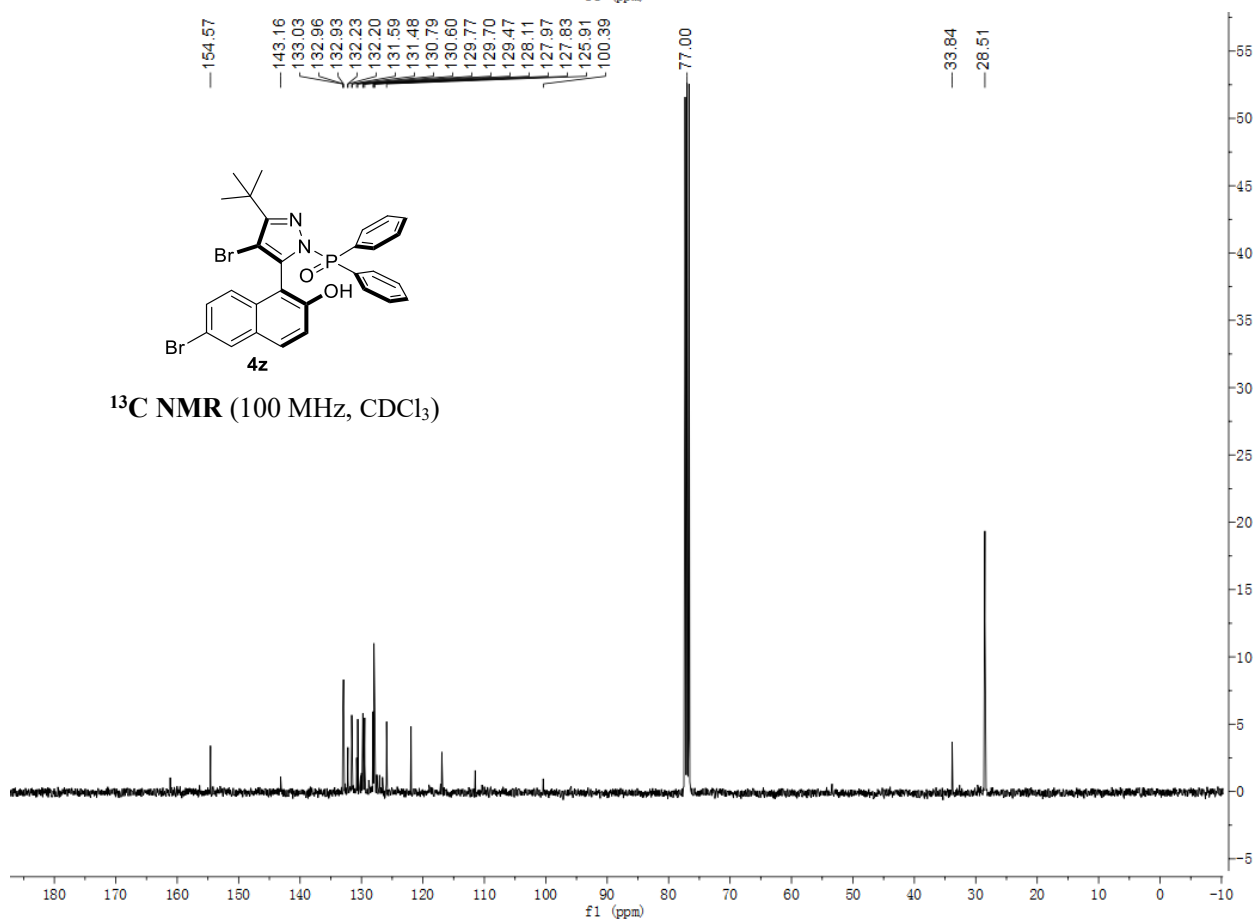

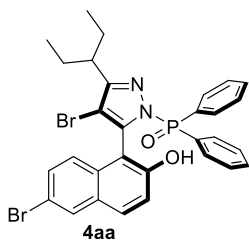

<sup>1</sup>H NMR (400 MHz, CDCl<sub>3</sub>)

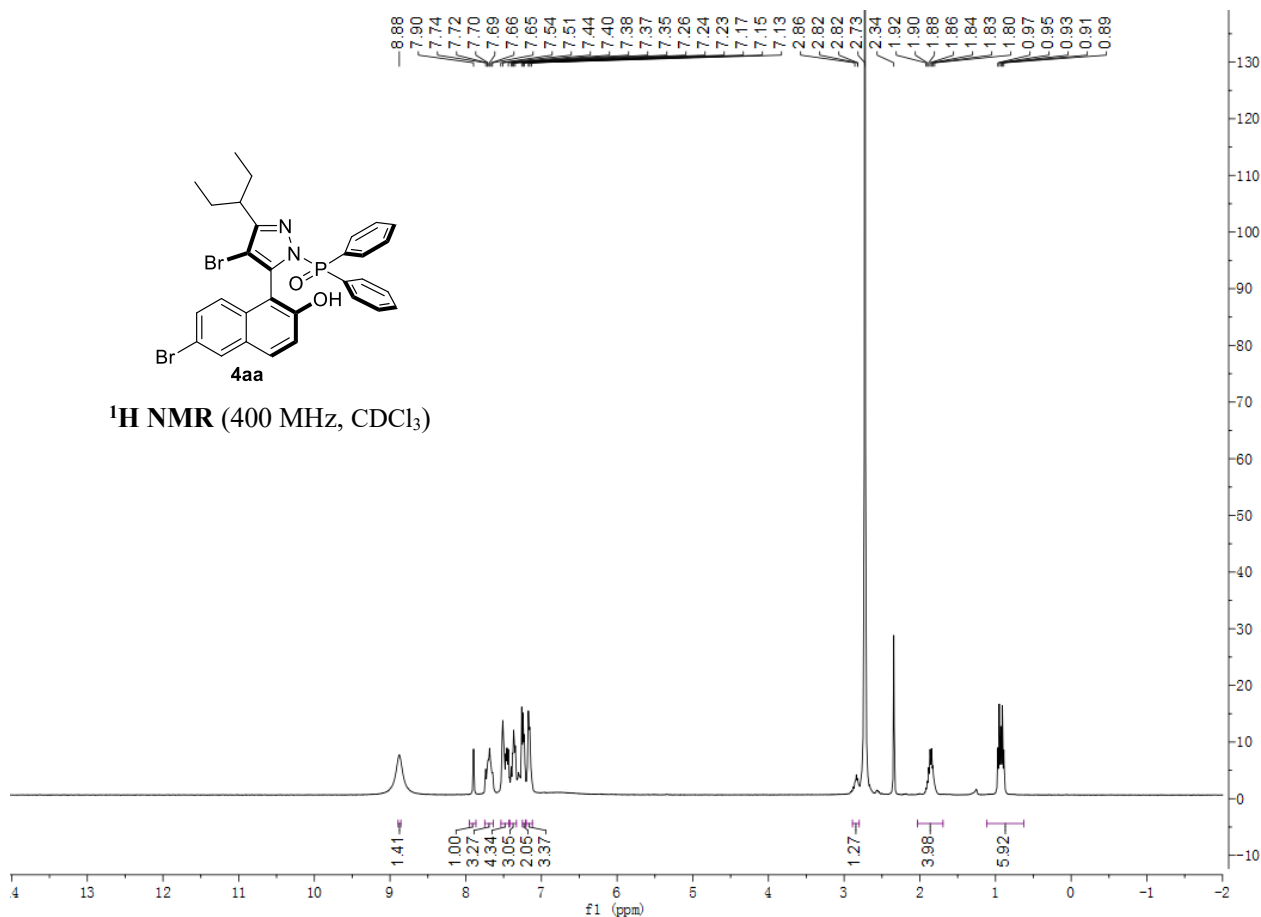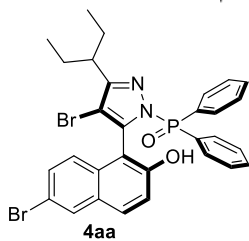

<sup>13</sup>C NMR (100 MHz, acetone-*d*<sub>6</sub>)

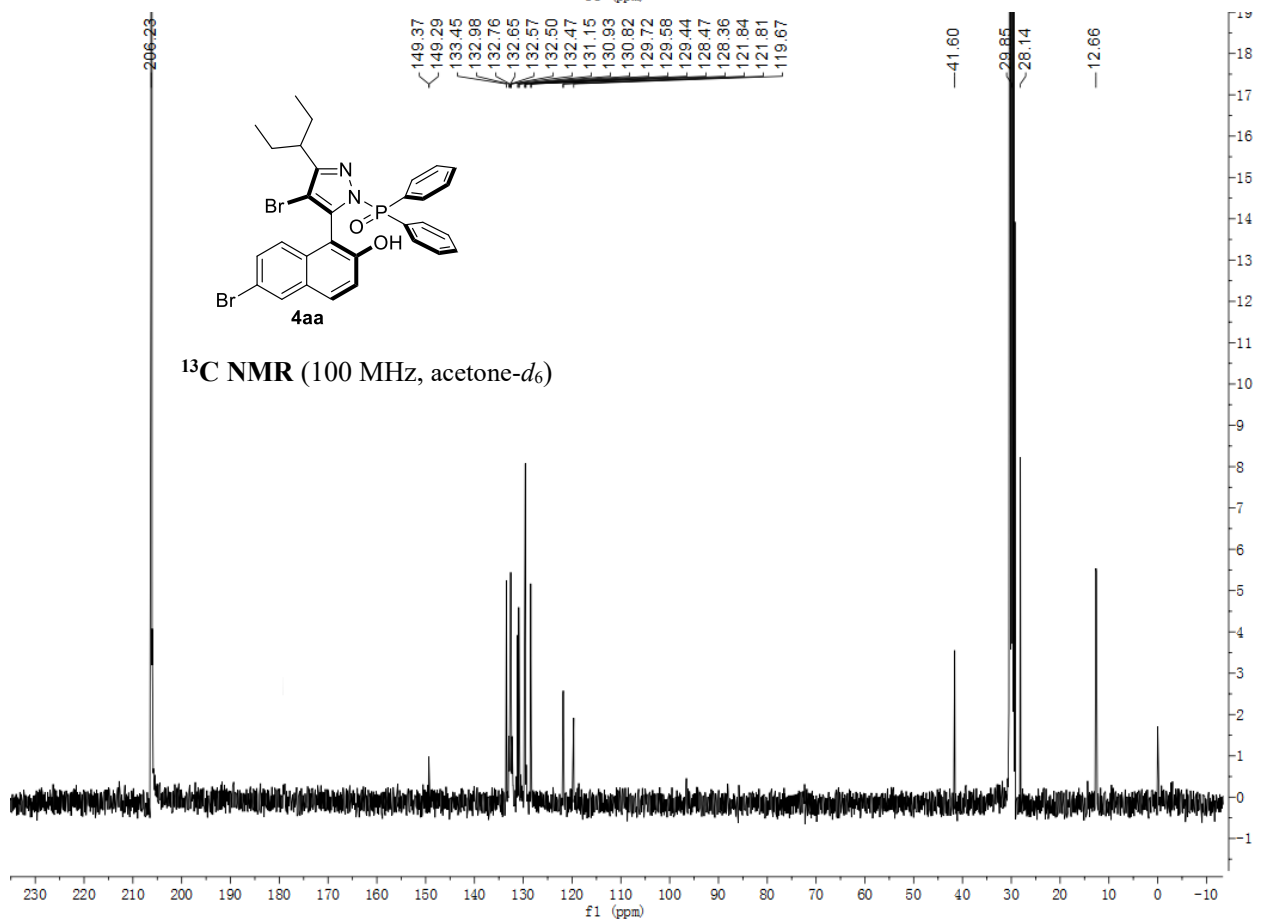

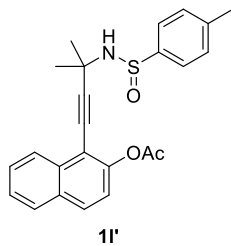

**<sup>1</sup>H NMR (400 MHz, CDCl<sub>3</sub>)**

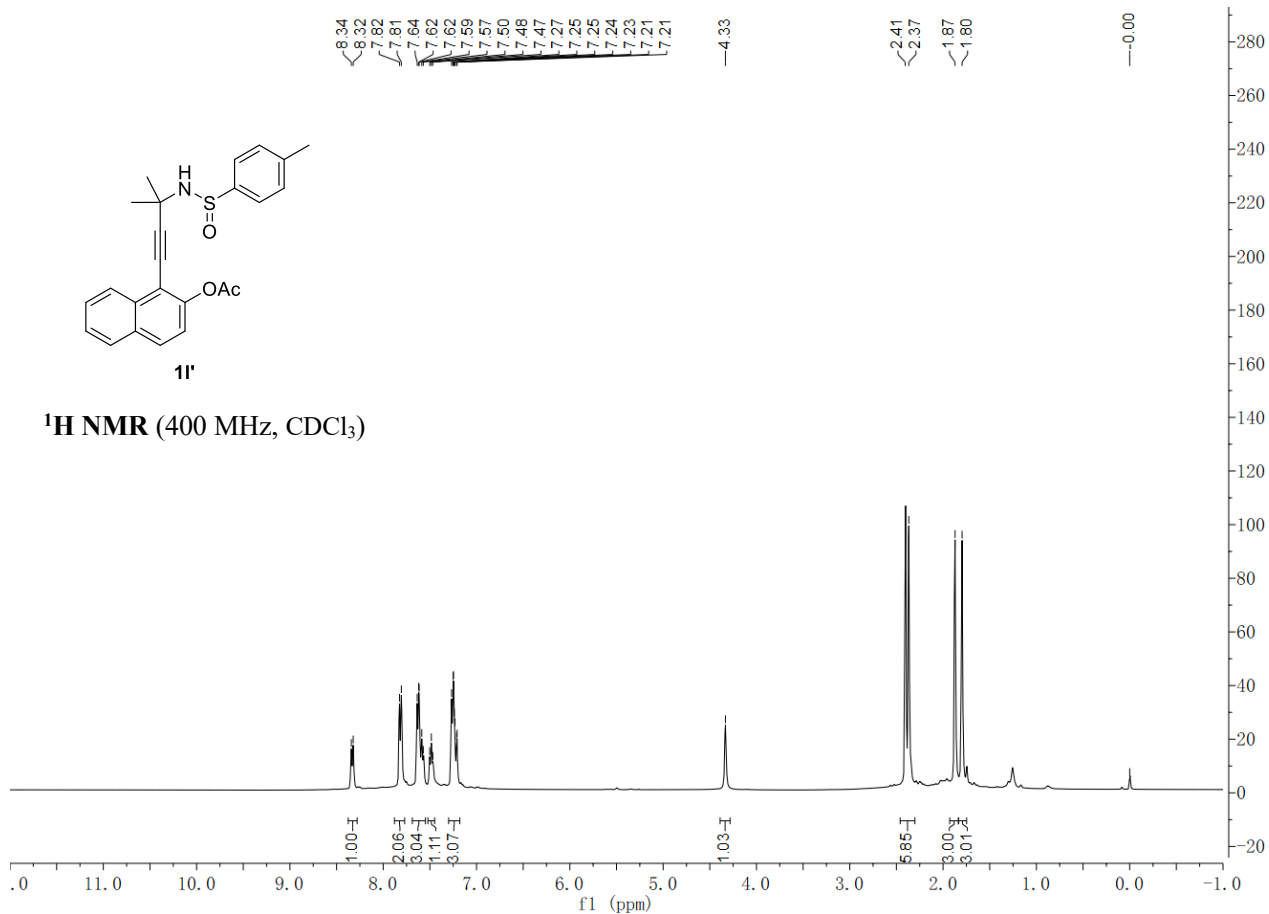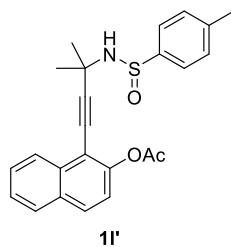

**<sup>13</sup>C NMR (100 MHz, CDCl<sub>3</sub>)**

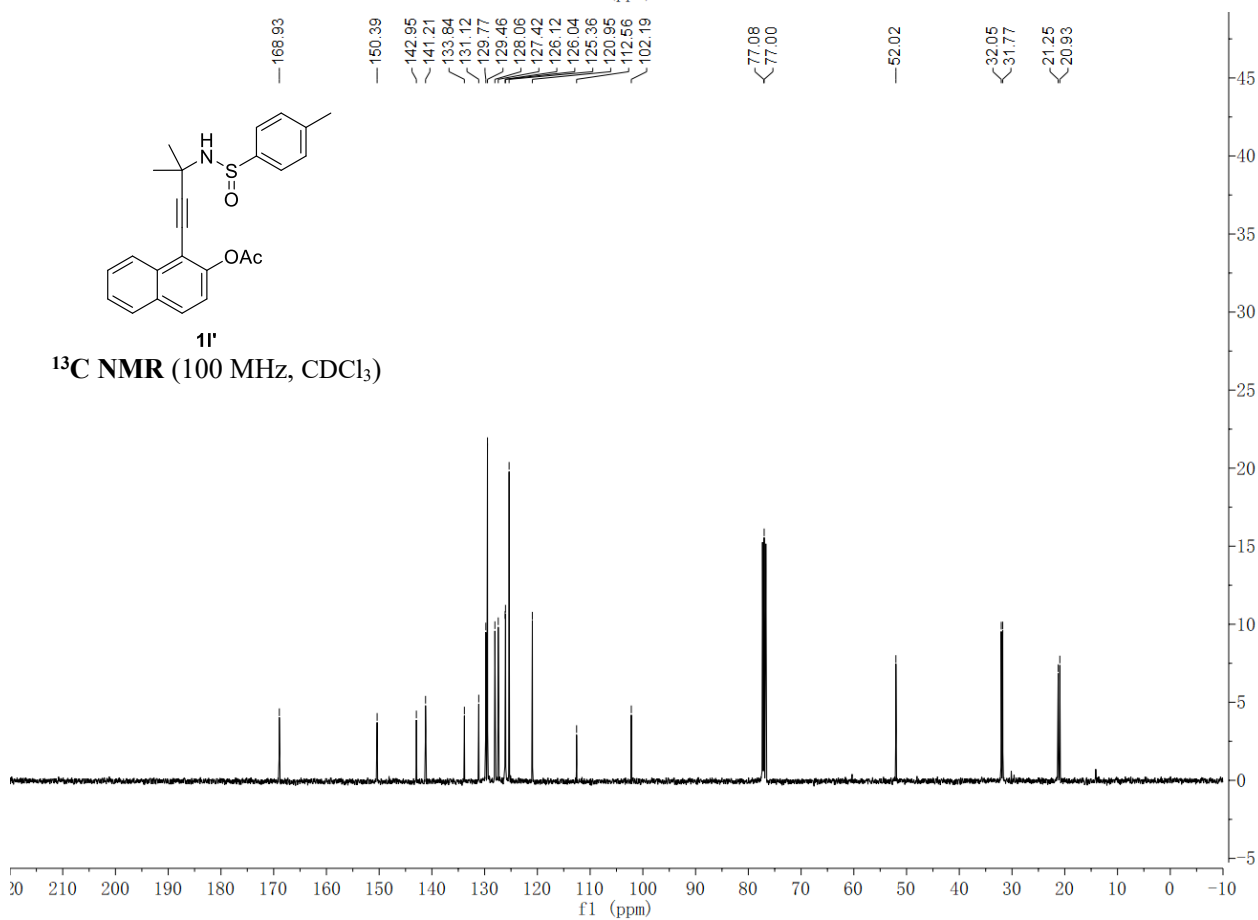

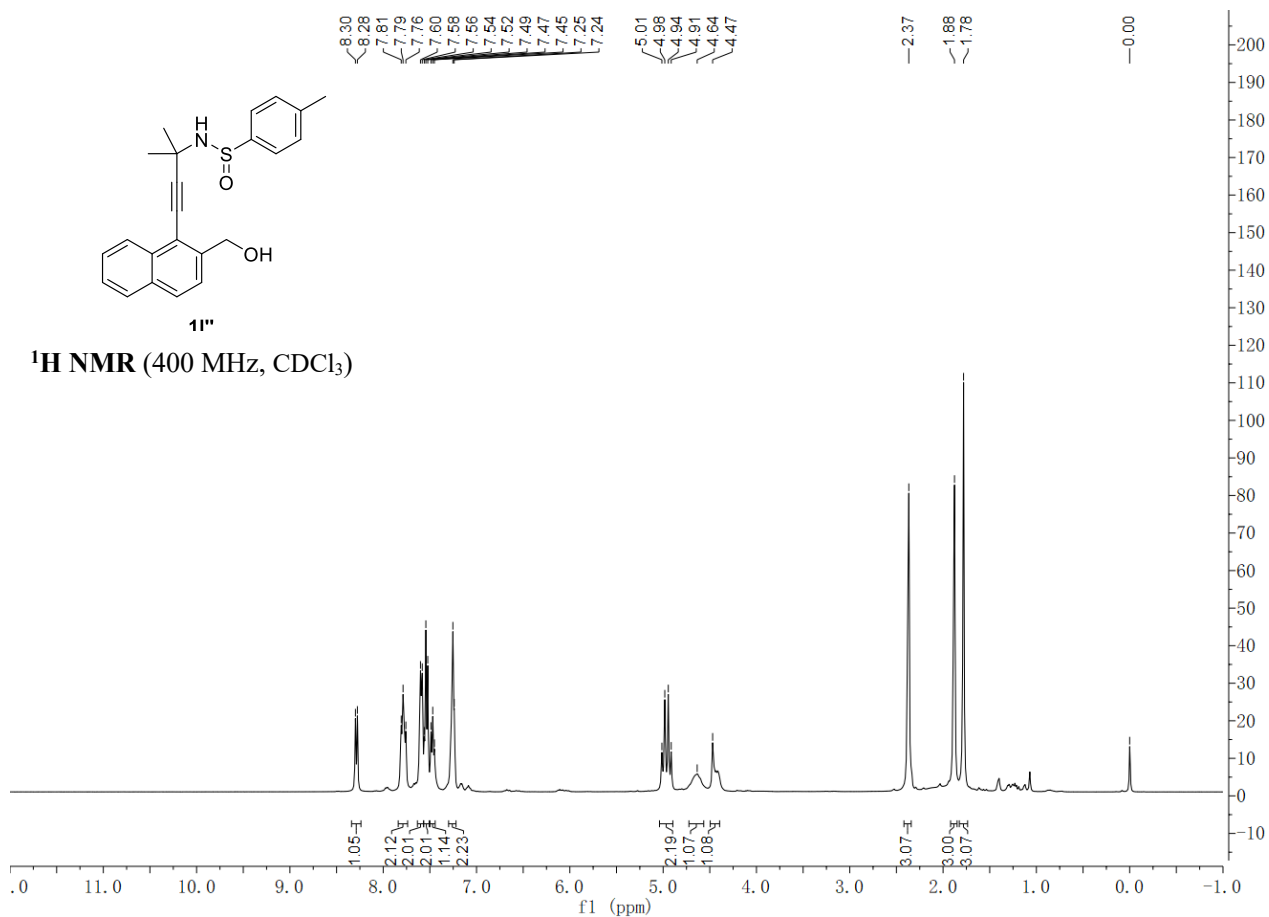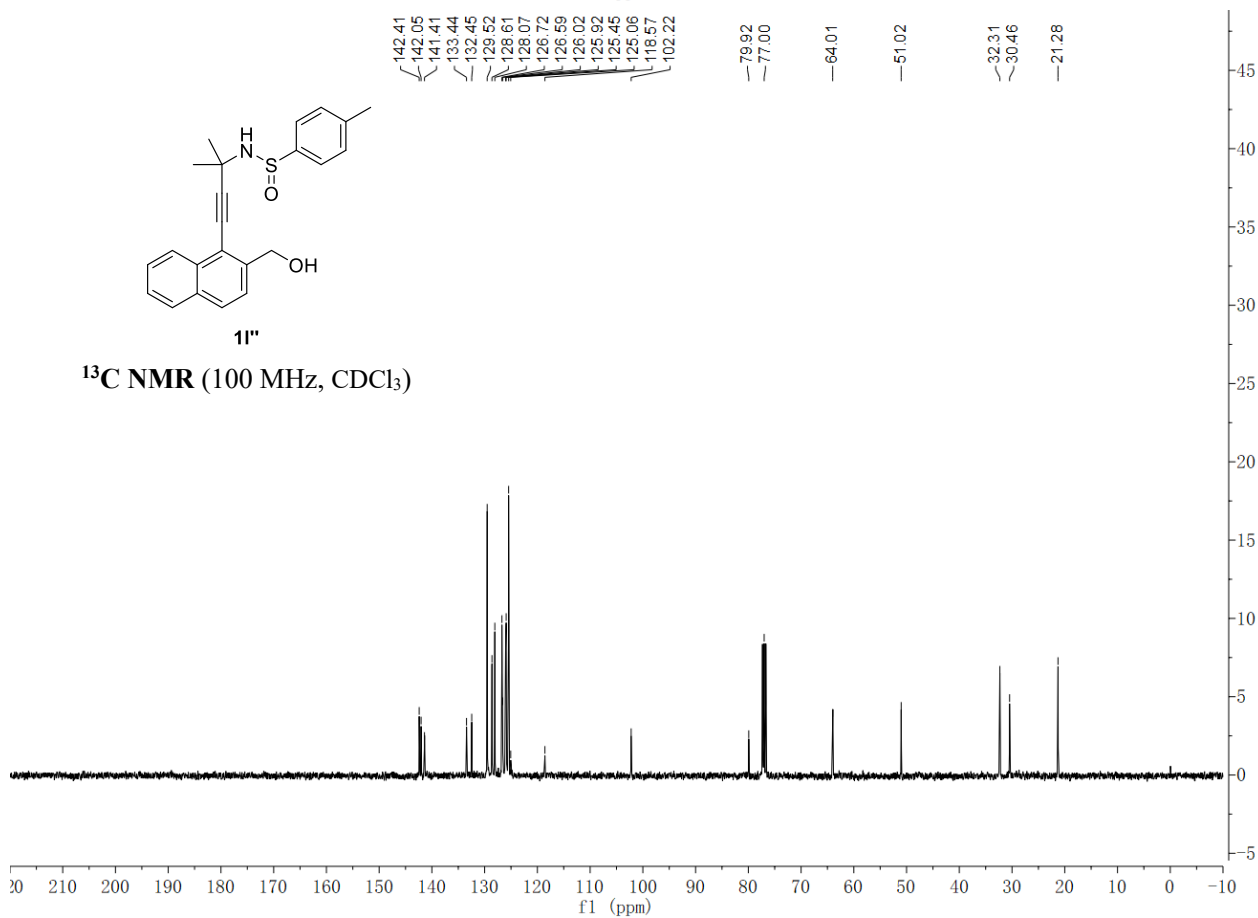



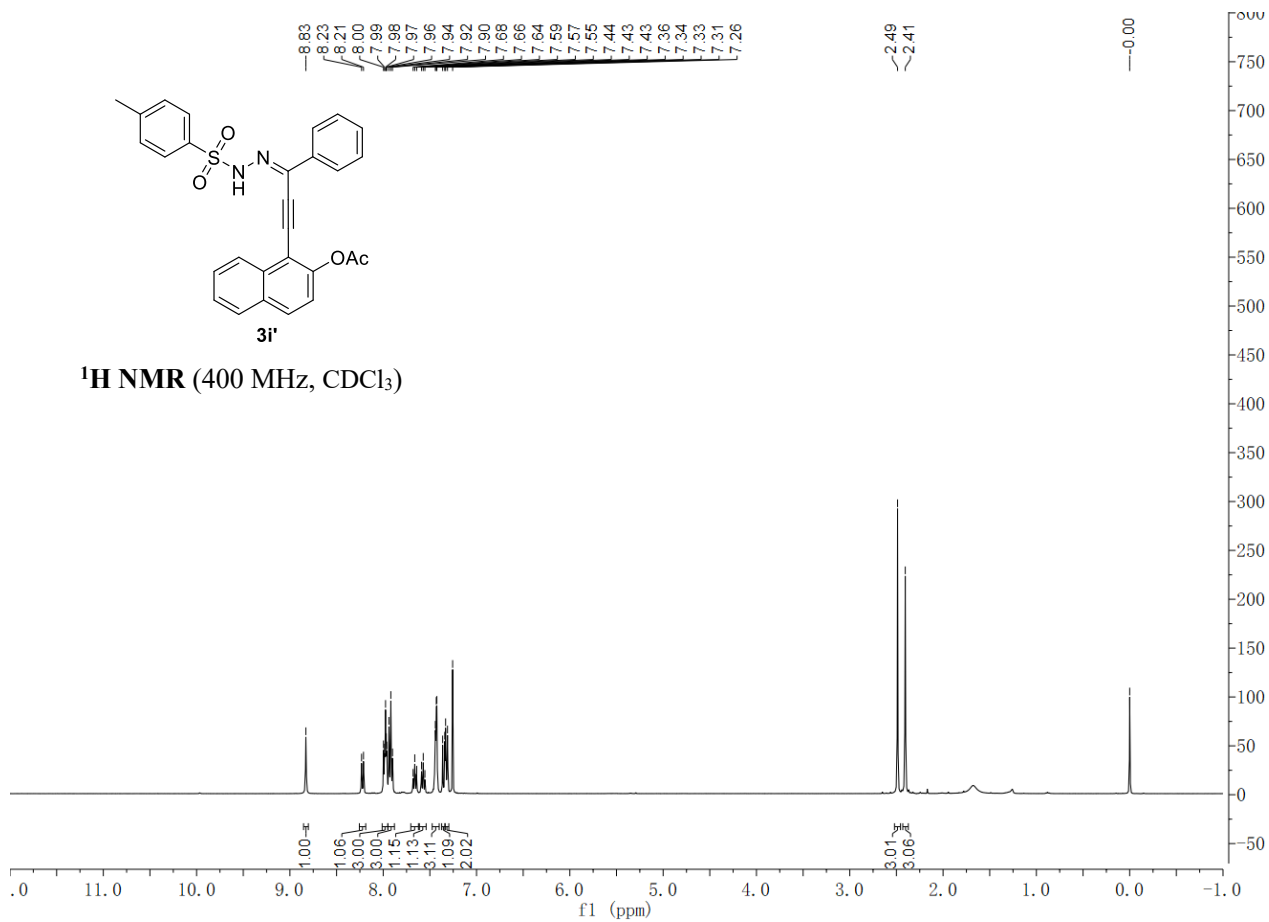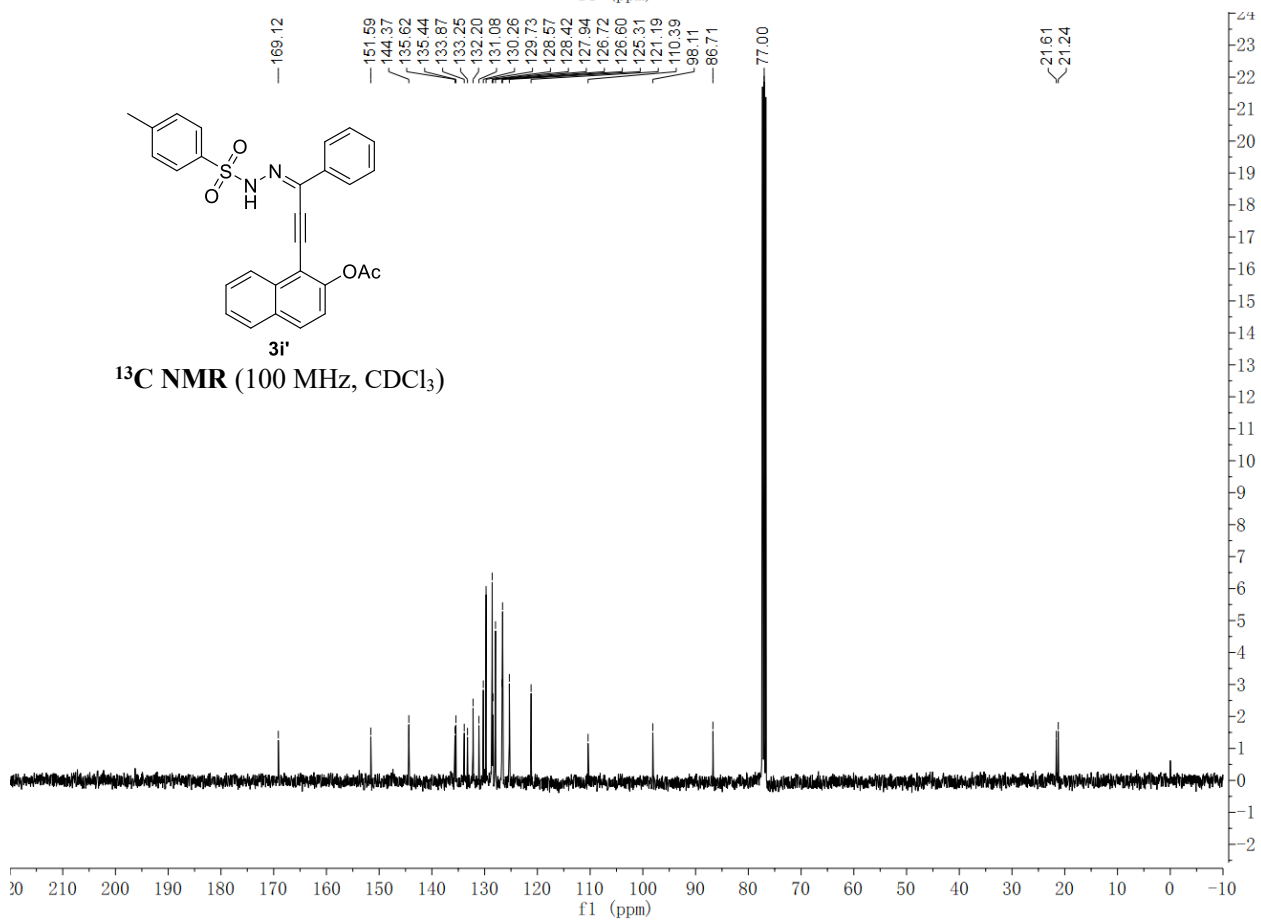

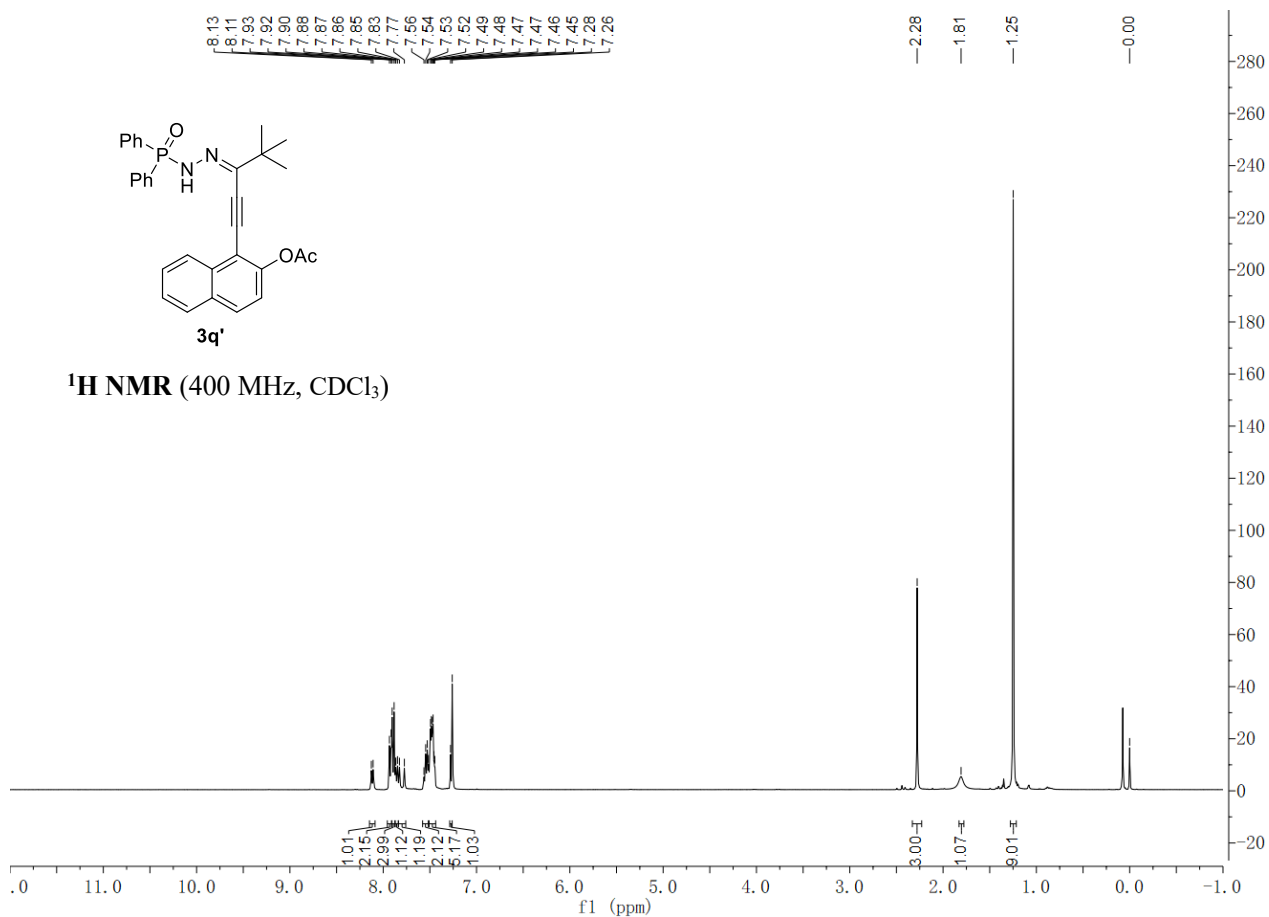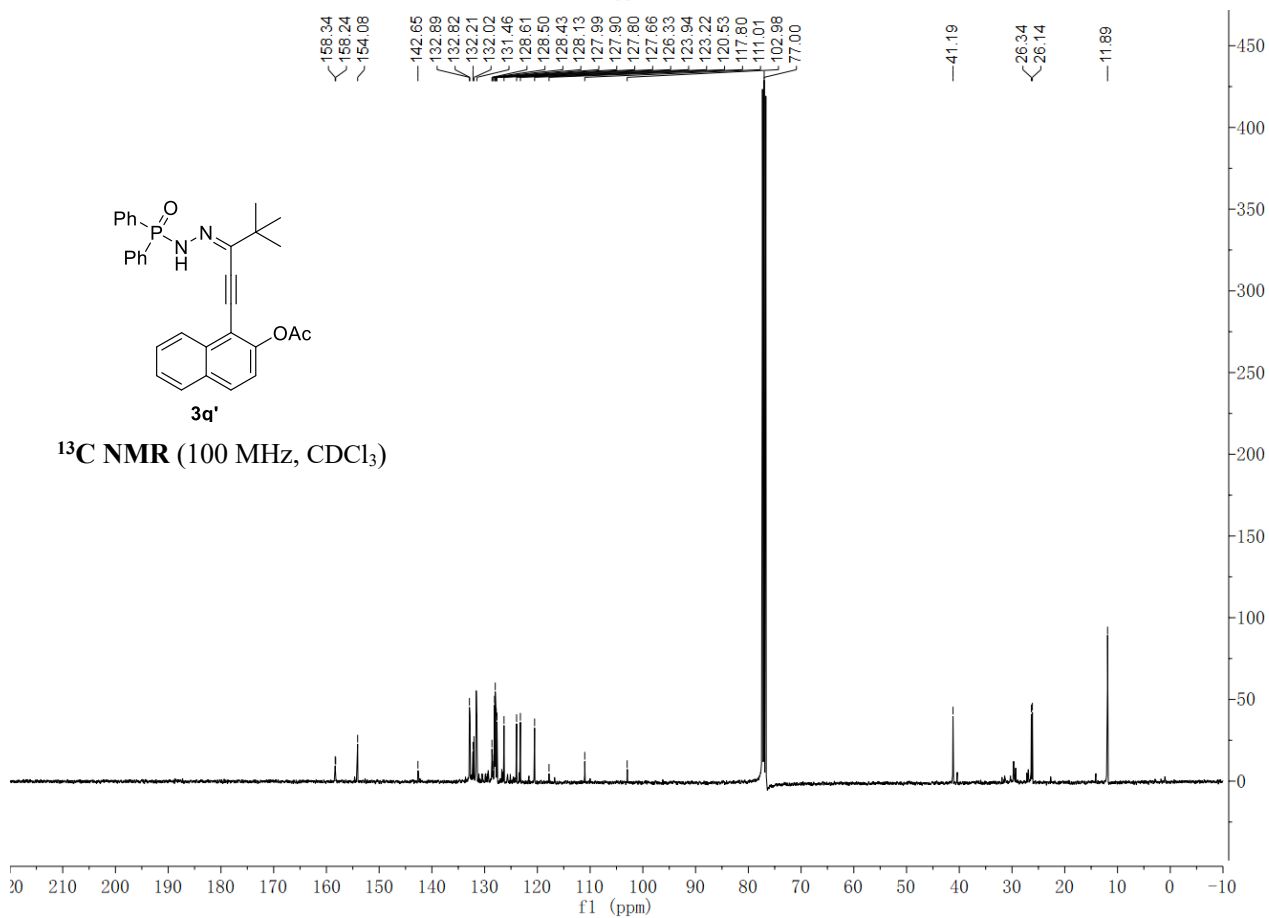

## VIII. X-ray crystallographic information

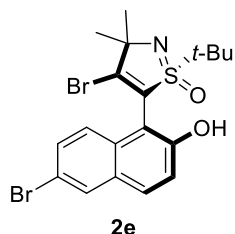

≡

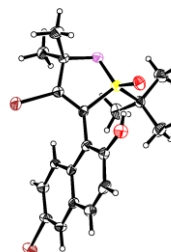

**CCDC 2110586**

|                        |                                |                    |                      |
|------------------------|--------------------------------|--------------------|----------------------|
| Bond precision:        | C-C = 0.0092 Å                 |                    | Wavelength = 0.71073 |
| Cell:                  | a=8.4504(2)                    | b=11.8494(2)       | c=22.1690(5)         |
|                        | alpha=90                       | beta=93.171(3)     | gamma=90             |
| Temperature:           | 293 K                          |                    |                      |
|                        | Calculated                     | Reported           |                      |
| Volume                 | 2216.43(8)                     | 2216.43(8)         |                      |
| Space group            | P 21                           | P 1 21 1           |                      |
| Hall group             | P 2yb                          | P 2yb              |                      |
| Moiety formula         | C19 H21 Br2 N O2 S [+ solvent] | C19 H21 Br2 N O2 S |                      |
| Sum formula            | C19 H21 Br2 N O2 S [+ solvent] | C19 H21 Br2 N O2 S |                      |
| Mr                     | 487.23                         | 487.25             |                      |
| Dx, g cm <sup>-3</sup> | 1.460                          | 1.460              |                      |
| Z                      | 4                              | 4                  |                      |
| Mu (mm <sup>-1</sup> ) | 3.762                          | 3.762              |                      |
| F000                   | 976.0                          | 976.0              |                      |
| F000'                  | 974.60                         |                    |                      |
| h,k,lmax               | 11,16,30                       | 11,16,30           |                      |
| Nref                   | 11815[ 6181]                   | 10067              |                      |
| Tmin,Tmax              | 0.312,0.336                    | 0.757,1.000        |                      |
| Tmin'                  | 0.288                          |                    |                      |

Correction method= # Reported T Limits: Tmin=0.757 Tmax=1.000

AbsCorr = MULTI-SCAN

Data completeness= 1.63/0.85

Theta(max)= 29.032

R(reflections)= 0.0443( 7331)

wR2(reflections)= 0.0976( 10067)

S = 1.013

Npar = 463

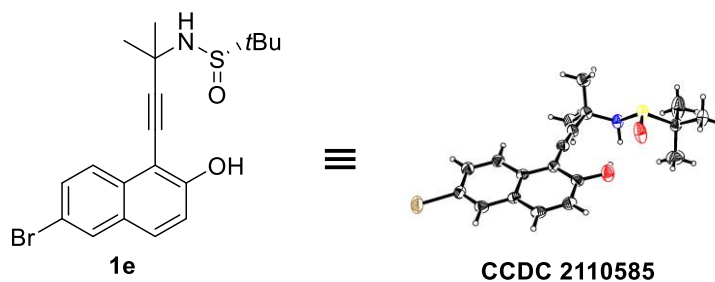

|                        |                   |                      |                      |
|------------------------|-------------------|----------------------|----------------------|
| Bond precision:        | C-C = 0.0123 Å    |                      | Wavelength = 0.71073 |
| Cell:                  | a=9.6180(5)       | b=20.7242(8)         | c=10.1734(4)         |
|                        | alpha=90          | beta=106.209(5)      | gamma=90             |
| Temperature:           | 295 K             |                      |                      |
|                        | Calculated        | Reported             |                      |
| Volume                 | 1947.21(16)       | 1947.21(15)          |                      |
| Space group            | P 21              | P 1 21 1             |                      |
| Hall group             | P 2yb             | P 2yb                |                      |
| Moiety formula         | C19 H22 Br N O2 S | 2(C19 H22 Br N O2 S) |                      |
| Sum formula            | C19 H22 Br N O2 S | C38 H44 Br2 N2 O4 S2 |                      |
| Mr                     | 408.34            | 816.69               |                      |
| Dx, g cm <sup>-3</sup> | 1.393             | 1.393                |                      |
| Z                      | 4                 | 2                    |                      |
| Mu (mm <sup>-1</sup> ) | 2.229             | 2.229                |                      |
| F000                   | 840.0             | 840.0                |                      |
| F000'                  | 839.64            |                      |                      |
| h,k,lmax               | 13,28,13          | 13,28,13             |                      |
| Nref                   | 10405[ 5340]      | 8941                 |                      |
| Tmin,Tmax              | 0.495,0.536       | 0.667,1.000          |                      |
| Tmin'                  | 0.485             |                      |                      |

Correction method= # Reported T Limits: Tmin=0.667 Tmax=1.000

AbsCorr = MULTI-SCAN

Data completeness= 1.67/0.86

Theta(max)= 29.057

R(reflections)= 0.0564( 4176)

wR2(reflections)= 0.1389( 8941)

S = 0.970

Npar= 451

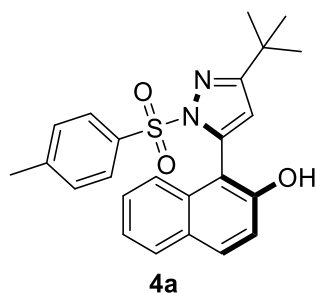

≡

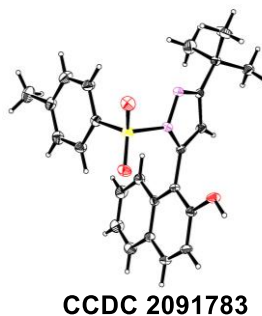

|                        |                                                                 |                                                                 |                     |
|------------------------|-----------------------------------------------------------------|-----------------------------------------------------------------|---------------------|
| Bond precision:        | C-C = 0.0062 A                                                  |                                                                 | Wavelength= 0.71073 |
| Cell:                  | a= 8.8686(4)                                                    | b= 10.6372(5)                                                   | c= 11.7142(7)       |
|                        | alpha=90                                                        | beta=94.076(5)                                                  | gamma=90            |
| Temperature:           | 293 K                                                           |                                                                 |                     |
|                        | Calculated                                                      | Reported                                                        |                     |
| Volume                 | 1096.90(10)                                                     | 1096.90(10)                                                     |                     |
| Space group            | P 21                                                            | P 1 21 1                                                        |                     |
| Hall group             | P 2yb                                                           | P 2yb                                                           |                     |
| Moiety formula         | C <sub>24</sub> H <sub>24</sub> N <sub>2</sub> O <sub>3</sub> S | C <sub>24</sub> H <sub>24</sub> N <sub>2</sub> O <sub>3</sub> S |                     |
| Sum formula            | C <sub>24</sub> H <sub>24</sub> N <sub>2</sub> O <sub>3</sub> S | C <sub>24</sub> H <sub>24</sub> N <sub>2</sub> O <sub>3</sub> S |                     |
| Mr                     | 420.51                                                          | 420.51                                                          |                     |
| Dx,g cm <sup>-3</sup>  | 1.273                                                           | 1.273                                                           |                     |
| Z                      | 2                                                               | 2                                                               |                     |
| Mu (mm <sup>-1</sup> ) | 0.175                                                           | 0.175                                                           |                     |
| F000                   | 444.0                                                           | 444.0                                                           |                     |
| F000'                  | 444.43                                                          |                                                                 |                     |
| h,k,lmax               | 12,14,16                                                        | 11,14,15                                                        |                     |
| Nref                   | 5881[ 3092]                                                     | 4972                                                            |                     |
| Tmin,Tmax              | 0.941,0.952                                                     | 0.825,1.000                                                     |                     |
| Tmin'                  | 0.941                                                           |                                                                 |                     |

Correction method= # Reported T Limits: Tmin=0.825 Tmax=1.000

AbsCorr = MULTI-SCAN

Data completeness= 1.61/0.85

Theta(max)= 29.100

R(reflections)= 0.0494( 3868)

wR2(reflections)= 0.1148( 4972)

S = 1.068

Npar= 276

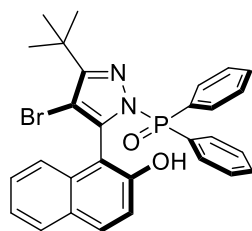

**4q**

≡

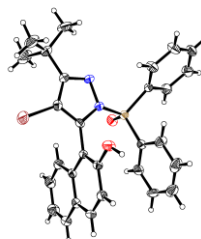

**CDCC 2092005**

|                        |                                                                    |                                                                    |                    |
|------------------------|--------------------------------------------------------------------|--------------------------------------------------------------------|--------------------|
| Bond precision:        | C-C = 0.0079 Å                                                     |                                                                    | Wavelength=0.71073 |
| Cell:                  | a=7.6050(4)                                                        | b=14.1761(5)                                                       | c=24.385(1)        |
|                        | alpha=90                                                           | beta=90                                                            | gamma=90           |
| Temperature:           | 293 K                                                              |                                                                    |                    |
|                        | Calculated                                                         | Reported                                                           |                    |
| Volume                 | 2628.9(2)                                                          | 2628.93(19)                                                        |                    |
| Space group            | P 21 21 21                                                         | P 21 21 21                                                         |                    |
| Hall group             | P 2ac 2ab                                                          | P 2ac 2ab                                                          |                    |
| Moiety formula         | C <sub>29</sub> H <sub>26</sub> Br N <sub>2</sub> O <sub>2</sub> P | C <sub>29</sub> H <sub>26</sub> Br N <sub>2</sub> O <sub>2</sub> P |                    |
| Sum formula            | C <sub>29</sub> H <sub>26</sub> Br N <sub>2</sub> O <sub>2</sub> P | C <sub>29</sub> H <sub>26</sub> Br N <sub>2</sub> O <sub>2</sub> P |                    |
| Mr                     | 545.39                                                             | 545.40                                                             |                    |
| Dx, g cm <sup>-3</sup> | 1.378                                                              | 1.378                                                              |                    |
| Z                      | 4                                                                  | 4                                                                  |                    |
| Mu (mm <sup>-1</sup> ) | 1.653                                                              | 1.653                                                              |                    |
| F <sub>000</sub>       | 1120.0                                                             | 1120.0                                                             |                    |
| F <sub>000</sub> '     | 1119.64                                                            |                                                                    |                    |
| h,k,lmax               | 10,19,33                                                           | 10,19,33                                                           |                    |
| Nref                   | 7070[ 3991]                                                        | 5952                                                               |                    |
| Tmin,Tmax              | 0.615,0.640                                                        | 0.683,1.000                                                        |                    |
| Tmin'                  | 0.603                                                              |                                                                    |                    |

Correction method= # Reported T Limits: Tmin=0.683 Tmax=1.000

AbsCorr = MULTI-SCAN

Data completeness= 1.49/0.84

Theta(max)= 29.136

R(reflections)= 0.0530( 4105)

wR2(reflections)= 0.1268( 5952)

S = 1.023

Npar= 32

## Biological evaluation

### IX. COX-2 inhibitory assay

The ability of compounds to inhibit COX-2 was determined using a COX-2 inhibitor screening assay kit according to the instruction manual (Biyuntian Biotech Co., Ltd., Shanghai, China). The kit measures the conversion of arachidonic acid to prostaglandin G2 by COX-2. In brief, a recombinant human COX-2 protein in a black 96-well plate was mixed with the test compounds at varying concentrations or with celecoxib, a selective COX-2 inhibitor as a positive control. Following a 10-min incubation at 37 °C, the plates were read on a Spectramax microplate reader (Molecular Devices, US) using a setting of ex/em at 570 nm and 590 nm, respectively. The inhibition rate on COX-2 activity was calculated following the manufacturer's instruction. Compound **4n** and **4l** did not show obvious inhibitory effect on COX-2 enzyme with doses up to 10 µM, while celecoxib was detected to inhibit the enzyme activity by 78.2% at 100 nM.

### X. Cell culture

Six cancer cell lines A549, MIA PaCa-2, A375, MCF7, MDA-MB-231, HeLa and human hepatocyte cell line L02 were used in this work. All cell lines were grown in Dulbecco's modified Eagle's medium (DMEM, Hyclone), except for A375, which was maintained in Gibco DMEM (High Glucose) with sodium pyruvate (Invitrogen) added. All media were supplemented with 10% foetal bovine serum (FBS, BI), 100 units/mL of penicillin–streptomycin (Sigma-Aldrich), incubated at 37 °C in a humidified atmosphere containing 5% CO<sub>2</sub>.

### XI. Anti-proliferation assay

The anti-proliferative activities of the prepared compounds against the mentioned cell lines were evaluated using a standard (MTT)-based colorimetric assay with some modification. Cell lines were grown to log phase in DMEM supplemented with 10% foetal bovine serum. Cell suspensions were prepared and 100 µL/well dispensed into 96-well plates to give 2 x 10<sup>3</sup> cells/well. After incubation for 24 h, cells were treated with the target compounds at 1.56, 3.125, 6.25, 12.5, 25, 50 µM and incubated for 48 h at 37 °C in a humidified atmosphere of 5% CO<sub>2</sub>. Afterwards, cell viability was assessed by the conventional 3-(4, 5-dimethylthiazol-2-yl)-2, 5-diphenyltetrazolium bromide (MTT) reduction assay carried out strictly according to the manufacturer's instructions (Sigma). The absorbance (OD<sub>570</sub>) was read on a Spectramax microplate reader (Molecular Devices,

US). In all experiments, three replicate wells were used for each drug concentration. Each assay was performed at least three times.

## XII. Cell apoptosis analysis

Approximately  $10^5$  cells/well of A375 cells were plated in a 12-well plate and allowed to adhere. Subsequently, the medium was replaced with fresh culture medium containing compound **4x** at different concentrations (0, 2, 4 and 8  $\mu\text{M}$ ) or 4  $\mu\text{M}$  compound **4x** at different times (0, 12, 24 and 48 h). Non-treated wells received an equivalent volume of ethanol (<0.1%). After treatment, cells were trypsinized, washed in PBS and centrifuged at 2000 rpm for 5 min. The pellet was resuspended in 500  $\mu\text{L}$  staining solution (containing 5  $\mu\text{L}$  AnnexinV-FITC and 5  $\mu\text{L}$  PI (5 mg/mL) in binding buffer), mixed gently and incubated for 15 min at room temperature in dark. The samples were then analyzed by a FACSCalibur flow cytometer (Becton Dickinson, US), plotting at least 10000 events in the gate area per sample. Forward and side scatter gating strategy was used in flow cytometry analysis to identify the cells of interest based on the relative size and to remove debris and other events that are not of interest. Cells were selected in FSC-A/SSC-A dot plot to remove debris.

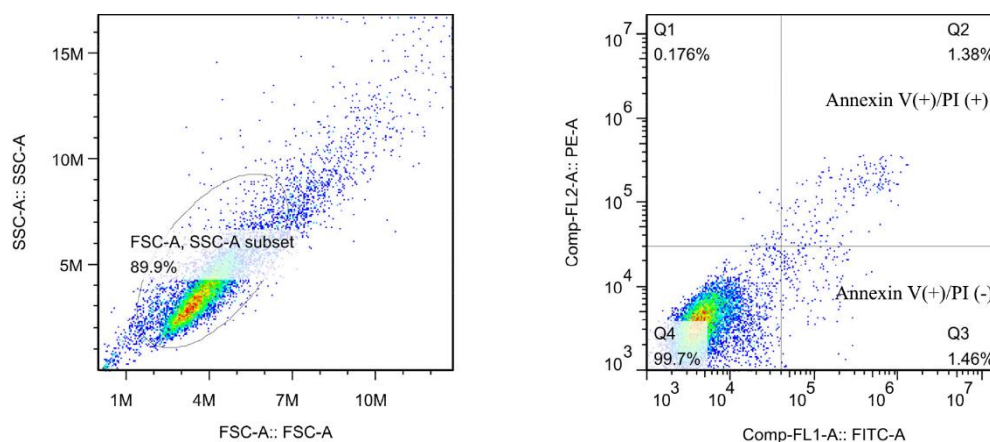

**Supplementary Figure 9.** The example of gating strategy in cell apoptosis. The percentage of early apoptotic cells in the lower right quadrant (Annexin V positive/PI negative cells), as well as late apoptotic cells located in the upper right quadrant (Annexin V positive/PI positive cells).

## XIII. Cell cycle analysis

A375 Cells were plated in 6-well plates ( $10^6$  cells per well) and, and serum-starved for 24 h. Cells were then incubated with compound **4x** at different concentrations (0, 2, 4 and 8  $\mu\text{M}$ ) or 4  $\mu\text{M}$  compound **4x** at different times (0, 12, 24 and 48 h). After treatment, cells were centrifuged at 1500 rpm at 4 °C for 5 min, fixed



in 70% ethanol at 4 °C for at least 12 h and subsequently resuspended in phosphate buffered saline (PBS) containing 0.1 mg/mL RNase A and 5 mg/mL propidium iodide (PI). The cellular DNA content was measured by flow cytometry (Becton Dickinson, US) for cell cycle distribution analysis, plotting at least 20000 events in the gate area per sample. The percentage of cells in different phases of the cell cycle were determined using Flowjo 10 software. Forward and side scatter gating strategy was used in flow cytometry analysis to identify the cells of interest based on the relative size and to remove debris and other events that are not of interest. Cells were selected in FSC-A/SSC-A dot plot to remove debris; single cells were gated using the PE-A/PE-H dot plot.

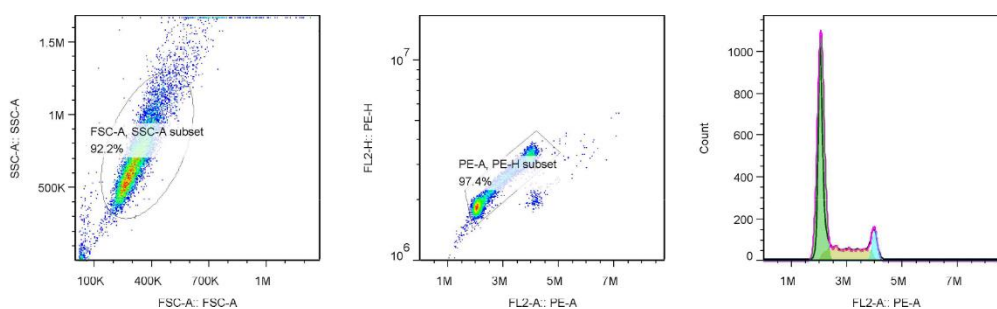

**Supplementary Figure 10.** The example of gating strategy in cell cycle analysis.

## XIV. ROS measurement

Intracellular ROS levels were examined using 2,7-dichloro-fluorescein diacetate (DCFH-DA). A375 cells were seeded in 6-well plates ( $10^6$  cells/well) for 24 h and then treated with compound **4x** (0, 2, 4 and 8  $\mu$ M) for 12 h. After treatment, according to the manufacturer's instructions (Thermo Fisher Scientific, USA), 400  $\mu$ L of 10  $\mu$ M DCFH-DA was added to each well and incubated for 20 min. Stained cells were washed three times with serum-free culture medium and analyzed using a flow cytometer. The expression level of ROS is shown by fluorescence intensity. Forward and side scatter gating strategy was used in flow cytometry analysis to identify the cells of interest based on the relative size and to remove debris and other events that are not of interest. Cells were selected in FSC-A/SSC-A dot plot to remove debris.

## XV. Mitochondrial membrane potential evaluation

Mitochondrial transmembrane potential ( $\Delta\Psi_m$ ) was detected using a JC-1 mitochondrial membrane potential assay kit (Beyotime Biotech). After the treatment of **4x**, the A375 cells were incubated at 37 °C for 20 min with 5  $\mu$ g/mL JC-1 (5,5,6,6-tetrachloro-1,1,3,3-tetraethylbenzimidazolylcarbocyanine iodide), then washed twice with PBS and placed in fresh medium without serum. The samples were analyzed using a FACSCalibur

cytometer (Becton Dickinson) equipped with a 488 nm argon laser. Forward and side scatter gating strategy was used in flow cytometry analysis to identify the cells of interest based on the relative size and to remove debris and other events that are not of interest. Cells were selected in FSC-A/SSC-A dot plot to remove debris.

## XVI. Western blot analysis

After treatment with compound **4x** (0, 2, 4 and 8  $\mu$ M) for 48 h, A375 cells were harvested and lysed in RIPA buffer for 30 min in an ice bath, and then centrifuged at 12000 rpm for 10 min at 4 °C. The supernatant was obtained, and protein concentrations were then determined using a BCA assay kit and boiled for 10 min at 100 °C. Equal amounts of protein (20  $\mu$ g) were separated on a 10% or 15% SDS-PAGE gel and transferred onto polyvinylidene difluoride membranes. The membranes were blocked with 5% BSA and probed with primary antibodies (1:500 dilution) at 4 °C with gentle shaking overnight. Then, the membranes were incubated with a 1:2000 dilution of corresponding HRP-conjugated secondary antibodies (Horseradish Peroxidase labeled goat anti-rabbit IGG (H+L)) for 1 h. Immunoreactive bands were visualized using an ECL detection kit (Invitrogen, USA) following the manufacturer's instruction. The intensity of protein bands was quantified using ImageLab analysis software. The relative optical density value represents protein expression.

## XVII. Druglikeness and activity cliff

The Lipinski's "rule of five" (RO5) defines physicochemical parameter ranges ( $MW \leq 500$ ,  $\log P \leq 5$ , H-bond donors  $\leq 5$ , H-bond acceptors  $\leq 10$  and rotatable bonds  $\leq 10$ ) associated with orally active drugs.<sup>[10]</sup> Most approved drugs follow at least three rules despite the administration form, and RO5 works as a rule of thumb to evaluate the druglikeness or whether a chemical is likely to be developed as an orally active drug.<sup>[11]</sup> In our study, most sulfone-containing pyrazoles meet four or all RO5 requirements, with only **4p** violates two rules; for the pyrazoles with diphenylphosphine oxides, all compounds follow at least three rules. The property data of representative compounds are listed in Supplementary Table 7. An activity cliff is generally defined as a pair of analogs with similar structures but having a large difference in potency (with a threshold of 10- or 100-fold).<sup>[12]</sup> Compound **4x** is more active than analog **4s** (>10 folds) toward A375 cells, suggesting a key role of the OMe substituent in SAR. Besides, the sulfone-containing pyrazoles were generally more cytotoxic than the pyrazoles with diphenylphosphine oxides toward non-cancer cells L02, and **4x** turned to be the most potent

agent. Hence, in this study **4x** was selected to be investigated thoroughly.

**Supplementary Table 7. IC<sub>50</sub> values and physicochemical properties of representative axial chiral pyrazoles.**

| Compound                                     | <b>4a</b>    | <b>4h</b>   | <b>4s</b>    | <b>4x</b>    | <b>4x'</b> | <b>Celecoxib</b> |
|----------------------------------------------|--------------|-------------|--------------|--------------|------------|------------------|
| A375<br>IC <sub>50</sub> (μM) <sup>[a]</sup> | 10.22 ± 0.33 | 6.51 ± 0.32 | 28.15 ± 1.56 | 2.57 ± 0.004 | 3.6 ± 0.07 | 15.92 ± 0.81     |
| MW                                           | 420.53       | 498.6       | 529.4        | 559.4        | 559.4      | 381.4            |
| log P <sup>[b]</sup>                         | 4.9          | 7.36        | 5.94         | 5.95         | 5.95       | 4.37             |
| H-bond<br>donors                             | 1            | 1           | 1            | 1            | 1          | 1                |
| H-bond<br>acceptors                          | 4            | 4           | 3            | 4            | 4          | 3                |
| Rotatable<br>bonds                           | 4            | 4           | 5            | 6            | 6          | 4                |

<sup>[a]</sup>Data are presented as the mean ± SD from at least three independent experiments; <sup>[b]</sup>Calculated by ChemOffice 2020.

**Supplementary Table 8. IC<sub>50</sub> values of the tested compounds toward A375 cells.**

| Compound  | IC <sub>50</sub> (μM) <sup>[a]</sup> | Compound   | IC <sub>50</sub> (μM) <sup>[a]</sup> |
|-----------|--------------------------------------|------------|--------------------------------------|
| <b>4a</b> | 10.22 ± 0.33                         | <b>4q</b>  | 28.79 ± 1.62                         |
| <b>4c</b> | 27.9 ± 1.83                          | <b>4r</b>  | 14.94 ± 0.67                         |
| <b>4d</b> | 12.49 ± 0.66                         | <b>4s</b>  | 28.15 ± 1.56                         |
| <b>4e</b> | 10.46 ± 0.41                         | <b>4u</b>  | 15.47 ± 0.71                         |
| <b>4f</b> | 13.52 ± 0.55                         | <b>4v</b>  | 25.16 ± 1.28                         |
| <b>4g</b> | 9.36 ± 0.31                          | <b>4w</b>  | 20.43 ± 0.98                         |
| <b>4h</b> | 6.51 ± 0.32                          | <b>4x</b>  | 2.57 ± 0.004                         |
| <b>4i</b> | 7.85 ± 0.35                          | <b>4y</b>  | 17.73 ± 0.99                         |
| <b>4k</b> | 12.51 ± 0.33                         | <b>4z</b>  | 15.1 ± 0.84                          |
| <b>4l</b> | 8.91 ± 0.28                          | <b>4aa</b> | 8.19 ± 0.47                          |
| <b>4n</b> | 11.11 ± 0.48                         |            |                                      |

<sup>[a]</sup>Data are presented as the mean values ± SD from at least three independent experiments.

**Supplementary Table 9. IC<sub>50</sub> values of 4x toward different cell lines.**

| Cell line  | IC <sub>50</sub> (μM) <sup>[a]</sup> |
|------------|--------------------------------------|
| A375       | 2.57 ± 0.004                         |
| A549       | 2.98 ± 0.4                           |
| Hela       | 7.24 ± 0.14                          |
| MCF-7      | 8.66 ± 0.97                          |
| MIA Paca-2 | 11.93 ± 1.2                          |
| MDA-MB-231 | 13.96 ± 0.76                         |
| L02        | 25.01 ± 1.47                         |

<sup>[a]</sup>Data are presented as the mean values ± SD from at least three independent experiments.

## Statistical analysis

All assays, with established cell lines were repeated three times. All data are expressed as mean ± SD. The statistical analysis was performed by the Student's t-test, and if appropriate, by a one-way ANOVA test, using the statistical software GraphPad Prism 8.

## XVIII. Supplementary References

- [1] J. Liu; Y. Liu, *Org. Lett.* **2012**, *14*, 4742-4745.
- [2] Y. Aota, Y. Maeda, T. Kano, K. Maruoka, *Chem. Eur. J.* **2019**, *25*, 15755-15758.
- [3] L. Ye, W. He, L. Zhang, *Angew. Chem. Int. Ed.* **2011**, *50*, 3236-3239; *Angew. Chem.* **2011**, *123*, 3294–3297.
- [4] P. Shi, Y. Tu, D. Zhang, C. Wang, K.-N. Truong, K. Rissanen, C. Bolm, *Adv. Synth. Catal.* **2021**, *363*, 2552-2556.
- [5] (a) G. Liu, T. Owens, T. Tang, J. Ellman, *J. Org. Chem.* 1998, *64*, 1278-1284. (b) M. Robak, M. Herbage, J. Ellman, *Chem. Rev.* 2010, *110*, 3600–3740. (c) G. Borg, D. Cogan, J. Ellman, *Tetrahedron Lett.* 1999, *40*, 6709-6712. (d) J. Colyer, J. Tedrow, T. Soukup, M. Faul, *J. Org. Chem.* 2006, *71*, 6859–6862. (e) C. Malapit, D. Caldwell, I. Luvaga, J. Reeves, I. Volchkov, N. Gonnella, Z. Han, C. Busacca, A. Howell, C. Senanayake, *Angew. Chem. Int. Ed.* 2017, *56*, 6999-7002. (f) Y. Gui, S. Tian, *Org. Lett.* 2017, *19*, 1554-1557.
- [6] M. Zora, A. Kivrak, C. Yazici, *J. Org. Chem.* **2011**, *76*, 6726-6742.
- [7] Z. Xia, J. Hu, Z. Shen, X. Wan, Q. Yao, Y. Lai, J.-M. Gao, W. Xie, *Org. Lett.* **2016**, *18*, 80-83.
- [8] J. Qian, Y. Liu, J. Zhu, B. Jiang, Z. Xu, *Org. Lett.* **2011**, *13*, 4220-4223.
- [9] F. Li, J. Nie, L. Sun, Y. Zheng, J. A. Ma, *Angew. Chem., Int. Ed.* **2013**, *52*, 6255-6258; *Angew. Chem.* **2013**, *125*, 6375-6378.
- [10] C. A. Lipinski, *Drug Discov. Today* **2004**, *1*, 337-341.
- [11] (a) W. P. Walters, *Expert Opin. Drug Dis.* **2012**, *7*, 99-107; (b) R. Roskoski, *Pharmacol. Res.* **2020**, *152*, 104609.
- [12] (a) D. Stumpfe, J. R. Bajorath, *J. Med. Chem.* **2012**, *55*, 2932-2942; (b) D. Stumpfe, H. Hu, J. R. Bajorath, *ACS Omega* **2019**, *4*, 14360-14368.
